# Supplementary material for: Millimeter-Wave Spectroscopy of Methylfuran Isomers: Local vs. Global Treatments of the Internal Rotation
Source: MDPI journal article supplement (doi:10.3390/molecules27113591), 2022-06-02
Supplement: s1 [file s1]

# Supporting Informations - table S1

Table S1: Molecular constants in the RAM system of 2-methylfuran obtained by a global fit using program BELGI-C<sub>s</sub>.

| Operator <sup>a</sup>                            | Constant <sup>b</sup> | Unit             | Present work <sup>c</sup>      |
|--------------------------------------------------|-----------------------|------------------|--------------------------------|
| $P_a^2$                                          | A                     | cm <sup>-1</sup> | 0.29308980(67)                 |
| $P_b^2$                                          | B                     | cm <sup>-1</sup> | 0.11841455(81)                 |
| $P_c^2$                                          | C                     | cm <sup>-1</sup> | 0.08558655(30)                 |
| $\{P_a, P_b\}$                                   | D <sub>ab</sub>       | cm <sup>-1</sup> | -0.005714(10)                  |
| $-P^4$                                           | $\Delta_J$            | cm <sup>-1</sup> | 0. 877042(31)*10 <sup>-8</sup> |
| $-P^2 P_a^2$                                     | $\Delta_{JK}$         | cm <sup>-1</sup> | 0.4673(24)*10 <sup>-7</sup>    |
| $-P_a^4$                                         | $\Delta_K$            | cm <sup>-1</sup> | 0.35765(32)*10 <sup>-7</sup>   |
| $-2P^2(P_b^2 - P_c^2)$                           | $\delta_J$            | cm <sup>-1</sup> | 0.238514(17)*10 <sup>-7</sup>  |
| $-\{P_a^2, (P_b^2 - P_c^2)\}$                    | $\delta_K$            | cm <sup>-1</sup> | 0.35765(32)*10 <sup>-7</sup>   |
| $P_\alpha^2$                                     | F                     | cm <sup>-1</sup> | 5.64 <sup>fixed</sup>          |
| $(1/2)(1 - \cos(3\alpha))$                       | V <sub>3</sub>        | cm <sup>-1</sup> | 420.3157(35)                   |
| $(1/2)(1 - \cos(6\alpha))$                       | V <sub>6</sub>        | cm <sup>-1</sup> | -9.010(11)                     |
| $P_a P_\gamma$                                   | $\rho$                | unitless         | 0.0551544(10)                  |
| $(1 - \cos 3\alpha)P_a^2$                        | k <sub>5</sub>        | cm <sup>-1</sup> | 0.1363(14)*10 <sup>-3</sup>    |
| $(1 - \cos 3\alpha)P^2$                          | F <sub>v</sub>        | cm <sup>-1</sup> | -0.168(25)*10 <sup>-3</sup>    |
| $(1 - \cos 3\alpha)(P_b^2 - P_c^2)$              | c <sub>2</sub>        | cm <sup>-1</sup> | -0.48350(37)*10 <sup>-4</sup>  |
| $P_\alpha^2 \{P_a, P_b\}$                        | $\Delta_{ab}$         | cm <sup>-1</sup> | -0.5554(40)*10 <sup>-5</sup>   |
| $P_a P_\alpha P^2$                               | L <sub>v</sub>        | cm <sup>-1</sup> | 0.1226(71)*10 <sup>-6</sup>    |
| $P_\alpha^2 P^2$                                 | G <sub>v</sub>        | cm <sup>-1</sup> | -0.1087(56)*10 <sup>-5</sup>   |
| $P_\alpha^4$                                     | k <sub>4</sub>        | cm <sup>-1</sup> | -0.2702(27)*10 <sup>-3</sup>   |
| $(1 - \cos 6\alpha)P^2$                          | N <sub>v</sub>        | cm <sup>-1</sup> | 0.296(20)*10 <sup>-4</sup>     |
| $P_a^6$                                          | H <sub>K</sub>        | cm <sup>-1</sup> | 0.35(10)*10 <sup>-13</sup>     |
| $N_{\nu t=0}/N_{\nu t=1}/N_{tot}$                |                       |                  | 14152/ 3742/ 17894             |
| $\sigma_{\nu t=0}/\sigma_{\nu t=1}/\sigma_{tot}$ |                       | kHz              | 107.3/ 114.3/ 108.8            |

<sup>a</sup> All constants refer to a rho-axis system, therefore the inertia tensor is not diagonal and the constants cannot be directly compared to those of a principal axis system. P<sub>a</sub>, P<sub>b</sub>, P<sub>c</sub> are the components of the overall rotation angular momentum, P<sub>γ</sub> is the angular momentum of the internal rotor rotating around the internal rotor axis by an angle γ. {u,v} is the anti commutator uv + vu.

<sup>b</sup> The product of the parameter and operator from a given row yields the term actually used in the vibration-rotation-torsion Hamiltonian, except for F, ρ and A, which occur in the Hamiltonian in the form  $F(P_\gamma - \rho P_a)^2 + AP_a^2$ .

$N_{\nu t=0}/N_{\nu t=1}/N_{tot}$  are the numbers of  $\nu_t = 0$  transitions,  $\nu_t = 1$  transitions and the total number of transitions.

$\sigma_{\nu t=0}/\sigma_{\nu t=1}/\sigma_{tot}$  are the respective standard deviations.

<sup>c</sup> Values of the parameters from the present fit. Statistical uncertainties are shown as one standard uncertainty in the last digit.
