# Supplementary material for: Millimeter-Wave Spectroscopy of Methylfuran Isomers: Local vs. Global Treatments of the Internal Rotation
Source: MDPI journal article supplement (doi:10.3390/molecules27113591), 2022-06-02
Supplement: s1 [file s1]

Supporting Informations - Line list of 2-methylfuran  
Millimeter-wave spectroscopy of methylfuran isomers: local vs  
global treatments of the internal rotation

Jonas Bruckhuisen, Sathapana Chawananon, Isabelle Kleiner, Anthony Roucou,  
Guillaume Dhont, Colwyn Bracquart, Pierre Asselin and Arnaud Cuisset



Table S3: Line list of the rotational transitions frequencies ( $\nu_{Obs.}$ ) of 2-methylfuran measured by Finneran *et al.* (I.A. Finneran, S.T. Shipman, S.L. Widicus Weaver, J. Mol. Spectrosc. 280 (2012), 27-33.) fitted globally for the ground and excited torsional states with an accuracy of 100 kHz using the BELGI-C<sub>s</sub> code.

| $J'$        | $K'_a$ | $K'_c$ | $J''$       | $K''_a$ | $K''_c$ | Sym. | $v_{tCH_3}$ | $\nu_{Obs.}$<br>MHz | $\nu_{Obs.} - \nu_{Calc.}$<br>MHz | $E_{low}$<br>cm <sup>-1</sup> |
|-------------|--------|--------|-------------|---------|---------|------|-------------|---------------------|-----------------------------------|-------------------------------|
| upper level |        |        | lower level |         |         |      |             |                     |                                   |                               |
| 30          | 9      | 21     | 30          | 9       | 22      | A    | 0           | 8737.845            | -0.060                            | 179.6836                      |
| 15          | 7      | 9      | 14          | 8       | 6       | A    | 0           | 8746.202            | -0.029                            | 101.0577                      |
| 30          | 9      | 21     | 30          | 9       | 22      | E    | 0           | 8761.228            | 0.042                             | 179.6904                      |
| 15          | 7      | 8      | 14          | 8       | 6       | E    | 0           | 8780.521            | 0.211                             | 101.0704                      |
| 15          | 7      | 8      | 14          | 8       | 7       | A    | 0           | 8781.616            | -0.010                            | 101.0577                      |
| 15          | 10     | 6      | 16          | 9       | 8       | E    | 0           | 8803.152            | -0.012                            | 110.6801                      |
| 15          | 7      | 9      | 14          | 8       | 7       | E    | 0           | 8812.984            | 0.014                             | 101.0595                      |
| 15          | 10     | 5      | 16          | 9       | 8       | A    | 0           | 8852.627            | -0.043                            | 110.6798                      |
| 26          | 13     | 14     | 25          | 14      | 11      | A    | 0           | 8922.112            | -0.022                            | 171.4832                      |
| 26          | 13     | 13     | 25          | 14      | 11      | E    | 0           | 8963.929            | 0.059                             | 171.4897                      |
| 26          | 13     | 14     | 25          | 14      | 12      | E    | 0           | 8967.258            | -0.023                            | 171.4761                      |
| 37          | 19     | 19     | 36          | 20      | 16      | A    | 0           | 9166.467            | 0.004                             | 280.5063                      |
| 37          | 19     | 18     | 36          | 20      | 17      | A    | 0           | 9166.467            | 0.004                             | 280.5063                      |
| 37          | 19     | 18     | 36          | 20      | 16      | E    | 0           | 9215.813            | -0.050                            | 280.5037                      |
| 46          | 27     | 20     | 47          | 26      | 21      | A    | 0           | 9218.190            | -0.033                            | 428.0984                      |
| 46          | 27     | 19     | 47          | 26      | 22      | A    | 0           | 9218.190            | -0.033                            | 428.0984                      |
| 48          | 25     | 24     | 47          | 26      | 22      | E    | 0           | 9433.880            | -0.086                            | 428.0859                      |
| 48          | 25     | 24     | 47          | 26      | 21      | A    | 0           | 9445.063            | -0.033                            | 428.0984                      |
| 48          | 25     | 23     | 47          | 26      | 22      | A    | 0           | 9445.063            | -0.033                            | 428.0984                      |
| 35          | 21     | 14     | 36          | 20      | 16      | E    | 0           | 9455.353            | -0.036                            | 280.5037                      |
| 48          | 25     | 23     | 47          | 26      | 21      | E    | 0           | 9480.695            | 0.061                             | 428.0882                      |
| 35          | 21     | 15     | 36          | 20      | 17      | E    | 0           | 9488.381            | 0.017                             | 280.4935                      |
| 35          | 21     | 15     | 36          | 20      | 16      | A    | 0           | 9503.377            | 0.049                             | 280.5063                      |
| 35          | 21     | 14     | 36          | 20      | 17      | A    | 0           | 9503.377            | 0.049                             | 280.5063                      |
| 59          | 31     | 28     | 58          | 32      | 26      | E    | 0           | 9705.930            | -0.160                            | 614.2165                      |
| 24          | 15     | 9      | 25          | 14      | 11      | E    | 0           | 9715.696            | -0.055                            | 171.4897                      |
| 24          | 15     | 10     | 25          | 14      | 12      | E    | 0           | 9718.993            | 0.061                             | 171.4761                      |
| 59          | 31     | 29     | 58          | 32      | 26      | A    | 0           | 9743.654            | 0.053                             | 614.2232                      |
| 59          | 31     | 28     | 58          | 32      | 27      | A    | 0           | 9743.654            | 0.053                             | 614.2232                      |
| 59          | 31     | 29     | 58          | 32      | 27      | E    | 0           | 9750.214            | -0.276                            | 614.2101                      |
| 24          | 15     | 10     | 25          | 14      | 11      | A    | 0           | 9760.001            | 0.004                             | 171.4832                      |
| 24          | 15     | 9      | 25          | 14      | 12      | A    | 0           | 9760.001            | 0.004                             | 171.4832                      |
| 13          | 4      | 9      | 13          | 4       | 10      | A    | 0           | 9837.935            | 0.013                             | 89.1446                       |
| 13          | 4      | 9      | 13          | 4       | 10      | E    | 0           | 9846.783            | 0.014                             | 89.1553                       |
| 17          | 8      | 10     | 16          | 9       | 7       | A    | 0           | 9895.986            | -0.057                            | 110.6798                      |
| 17          | 8      | 9      | 16          | 9       | 8       | A    | 0           | 9907.765            | -0.039                            | 110.6798                      |
| 13          | 9      | 5      | 14          | 8       | 7       | E    | 0           | 9919.189            | 0.019                             | 101.0595                      |
| 17          | 8      | 9      | 16          | 9       | 7       | E    | 0           | 9922.670            | 0.011                             | 110.6919                      |
| 13          | 9      | 4      | 14          | 8       | 6       | E    | 0           | 9947.425            | -0.007                            | 101.0704                      |
| 17          | 8      | 10     | 16          | 9       | 8       | E    | 0           | 9952.734            | 0.027                             | 110.6801                      |
| 28          | 14     | 15     | 27          | 15      | 12      | A    | 0           | 10073.075           | -0.022                            | 187.9188                      |
| 28          | 14     | 15     | 27          | 15      | 13      | E    | 0           | 10115.414           | -0.045                            | 187.9104                      |
| 28          | 14     | 14     | 27          | 15      | 12      | E    | 0           | 10117.649           | 0.031                             | 187.9239                      |
| 39          | 20     | 19     | 38          | 21      | 18      | A    | 0           | 10320.531           | -0.035                            | 303.7510                      |
| 39          | 20     | 20     | 38          | 21      | 17      | A    | 0           | 10320.531           | -0.035                            | 303.7510                      |
| 44          | 26     | 18     | 45          | 25      | 20      | E    | 0           | 10326.562           | -0.060                            | 399.2435                      |
| 39          | 20     | 20     | 38          | 21      | 18      | E    | 0           | 10336.620           | -0.035                            | 303.7379                      |
| 44          | 26     | 18     | 45          | 25      | 21      | A    | 0           | 10361.330           | -0.001                            | 399.2527                      |
| 44          | 26     | 19     | 45          | 25      | 20      | A    | 0           | 10361.330           | -0.001                            | 399.2527                      |
| 39          | 20     | 19     | 38          | 21      | 17      | E    | 0           | 10369.183           | 0.065                             | 303.7470                      |
| 50          | 26     | 25     | 49          | 27      | 23      | E    | 0           | 10584.868           | 0.014                             | 458.1346                      |
| 33          | 20     | 13     | 34          | 19      | 15      | E    | 0           | 10591.757           | -0.050                            | 258.4640                      |
| 50          | 26     | 24     | 49          | 27      | 23      | A    | 0           | 10601.115           | -0.000                            | 458.1465                      |
| 50          | 26     | 25     | 49          | 27      | 22      | A    | 0           | 10601.115           | -0.000                            | 458.1465                      |
| 50          | 26     | 24     | 49          | 27      | 22      | E    | 0           | 10632.736           | 0.082                             | 458.1354                      |
| 34          | 10     | 24     | 34          | 10      | 25      | E    | 0           | 10634.867           | 0.038                             | 210.5414                      |
| 33          | 20     | 13     | 34          | 19      | 16      | A    | 0           | 10640.610           | -0.040                            | 258.4650                      |
| 33          | 20     | 14     | 34          | 19      | 15      | A    | 0           | 10640.610           | -0.040                            | 258.4650                      |
| 10          | 3      | 7      | 10          | 3       | 8       | A    | 0           | 10807.700           | 0.022                             | 80.2755                       |
| 22          | 14     | 9      | 23          | 13      | 11      | E    | 0           | 10843.973           | 0.010                             | 156.2462                      |
| 22          | 14     | 8      | 23          | 13      | 10      | E    | 0           | 10846.247           | -0.022                            | 156.2598                      |
| 61          | 32     | 29     | 60          | 33      | 27      | E    | 0           | 10860.323           | 0.155                             | 651.0621                      |
| 22          | 14     | 8      | 23          | 13      | 11      | A    | 0           | 10887.815           | 0.020                             | 156.2520                      |
| 22          | 14     | 9      | 23          | 13      | 10      | A    | 0           | 10887.815           | 0.021                             | 156.2520                      |
| 64          | 37     | 28     | 65          | 36      | 29      | A    | 0           | 10898.691           | -0.011                            | 755.1714                      |
| 64          | 37     | 27     | 65          | 36      | 30      | A    | 0           | 10898.691           | -0.011                            | 755.1714                      |
| 61          | 32     | 29     | 60          | 33      | 28      | A    | 0           | 10900.533           | -0.029                            | 651.0674                      |
| 61          | 32     | 30     | 60          | 33      | 27      | A    | 0           | 10900.533           | -0.029                            | 651.0674                      |
| 11          | 8      | 4      | 12          | 7       | 6       | E    | 0           | 11027.206           | -0.057                            | 92.6439                       |
| 19          | 9      | 11     | 18          | 10      | 8       | A    | 0           | 11042.112           | -0.012                            | 121.5068                      |
| 19          | 9      | 10     | 18          | 10      | 9       | A    | 0           | 11045.941           | -0.017                            | 121.5068                      |
| 20          | 6      | 14     | 20          | 6       | 15      | A    | 0           | 11052.363           | 0.152                             | 117.8265                      |
| 11          | 8      | 3      | 12          | 7       | 5       | E    | 0           | 11059.747           | -0.026                            | 92.6537                       |
| 19          | 9      | 10     | 18          | 10      | 8       | E    | 0           | 11069.593           | -0.107                            | 121.5180                      |
| 11          | 8      | 4      | 12          | 7       | 5       | A    | 0           | 11074.886           | 0.029                             | 92.6405                       |
| 11          | 8      | 3      | 12          | 7       | 6       | A    | 0           | 11076.254           | 0.040                             | 92.6405                       |
| 19          | 9      | 11     | 18          | 10      | 9       | E    | 0           | 11095.079           | -0.024                            | 121.5055                      |
| 27          | 8      | 19     | 27          | 8       | 20      | A    | 0           | 11166.415           | 0.019                             | 158.2935                      |
| 27          | 8      | 19     | 27          | 8       | 20      | E    | 0           | 11189.580           | 0.060                             | 158.3012                      |
| 30          | 15     | 16     | 29          | 16      | 13      | A    | 0           | 11225.172           | -0.025                            | 205.5587                      |
| 30          | 15     | 15     | 29          | 16      | 14      | A    | 0           | 11225.172           | -0.026                            | 205.5587                      |
| 53          | 31     | 22     | 54          | 30      | 24      | E    | 0           | 11242.194           | 0.053                             | 544.1289                      |
| 30          | 15     | 16     | 29          | 16      | 14      | E    | 0           | 11264.228           | -0.030                            | 205.5491                      |
| 30          | 15     | 15     | 29          | 16      | 13      | E    | 0           | 11272.103           | 0.160                             | 205.5623                      |
| 10          | 4      | 7      | 9           | 5       | 4       | E    | 0           | 11415.721           | -0.048                            | 81.2964                       |
| 42          | 25     | 17     | 43          | 24      | 19      | E    | 0           | 11464.289           | -0.056                            | 371.6014                      |
| 41          | 21     | 21     | 40          | 22      | 18      | A    | 0           | 11475.574           | -0.001                            | 328.1991                      |
| 41          | 21     | 20     | 40          | 22      | 19      | A    | 0           | 11475.574           | -0.001                            | 328.1991                      |
| 41          | 21     | 21     | 40          | 22      | 19      | E    | 0           | 11486.299           | -0.072                            | 328.1857                      |
| 10          | 4      | 7      | 9           | 5       | 4       | A    | 0           | 11493.139           | 0.026                             | 81.2833                       |
| 42          | 25     | 18     | 43          | 24      | 19      | A    | 0           | 11502.572           | -0.107                            | 371.6095                      |
| 42          | 25     | 17     | 43          | 24      | 20      | A    | 0           | 11502.572           | -0.107                            | 371.6095                      |
| 42          | 25     | 18     | 43          | 24      | 20      | E    | 0           | 11509.577           | 0.084                             | 371.5962                      |
| 41          | 21     | 20     | 40          | 22      | 18      | E    | 0           | 11522.732           | 0.053                             | 328.1937                      |
| 10          | 4      | 7      | 9           | 5       | 5       | E    | 0           | 11641.392           | 0.013                             | 81.2889                       |
| 31          | 19     | 12     | 32          | 18      | 14      | E    | 0           | 11726.175           | -0.028                            | 237.6279                      |
| 52          | 27     | 26     | 51          | 28      | 23      | E    | 0           | 11736.618           | -0.051                            | 489.3856                      |
| 31          | 19     | 13     | 32          | 18      | 15      | E    | 0           | 11750.484           | 0.076                             | 237.6158                      |
| 52          | 27     | 26     | 51          | 28      | 23      | A    | 0           | 11757.832           | 0.003                             | 489.3967                      |
| 52          | 27     | 25     | 51          | 28      | 24      | A    | 0           | 11757.832           | 0.003                             | 489.3967                      |
| 31          | 19     | 13     | 32          | 18      | 14      | A    | 0           | 11775.380           | 0.044                             | 237.6273                      |
| 31          | 19     | 12     | 32          | 18      | 15      | A    | 0           | 11775.380           | 0.044                             | 237.6273                      |
| 52          | 27     | 25     | 51          | 28      | 24      | E    | 0           | 11785.064           | 0.064                             | 489.3849                      |
| 20          | 13     | 8      | 21          | 12      | 10      | E    | 0           | 11964.921           | -0.192                            | 142.2208                      |
| 20          | 13     | 7      | 21          | 12      | 9       | E    | 0           | 11972.767           | -0.106                            | 142.2343                      |
| 63          | 33     | 31     | 62          | 34      | 28      | A    | 0           | 12057.987           | -0.022                            | 689.1123                      |
| 63          | 33     | 30     | 62          | 34      | 29      | A    | 0           | 12057.987           | -0.022                            | 689.1123                      |
| 62          | 36     | 27     | 63          | 35      | 29      | E    | 0           | 12060.713           | 0.063                             | 715.1264                      |
| 2           | 0      | 2      | 1           | 0       | 1       | A    | 0           | 12093.572           | -0.012                            | 67.4541                       |



| $J'$ | $K'_a$ | $K'_c$ | $J''$ | $K''_a$ | $K''_c$ | Sym. | $v_{tCH_3}$ | $\nu_{Obs.}$ | $\nu_{Obs.} - \nu_{Calc.}$ | $E_{low}$ |
|------|--------|--------|-------|---------|---------|------|-------------|--------------|----------------------------|-----------|
| 21   | 10     | 12     | 20    | 11      | 9       | A    | 0           | 12188.484    | 0.027                      | 133.5386  |
| 21   | 10     | 11     | 20    | 11      | 10      | A    | 0           | 12189.641    | -0.047                     | 133.5386  |
| 21   | 10     | 11     | 20    | 11      | 9       | E    | 0           | 12219.448    | 0.046                      | 133.5488  |
| 21   | 10     | 12     | 20    | 11      | 10      | E    | 0           | 12239.750    | 0.042                      | 133.5357  |
| 51   | 30     | 22     | 52    | 29      | 24      | E    | 0           | 12334.971    | -0.084                     | 510.8851  |
| 32   | 16     | 16     | 31    | 17      | 15      | A    | 0           | 12378.311    | -0.017                     | 224.4026  |
| 32   | 16     | 17     | 31    | 17      | 14      | A    | 0           | 12378.311    | -0.017                     | 224.4026  |
| 51   | 30     | 21     | 52    | 29      | 23      | E    | 0           | 12382.682    | 0.267                      | 510.8873  |
| 32   | 16     | 17     | 31    | 17      | 15      | E    | 0           | 12413.567    | -0.048                     | 224.3920  |
| 32   | 16     | 16     | 31    | 17      | 14      | E    | 0           | 12426.754    | 0.045                      | 224.4047  |
| 40   | 24     | 16     | 41    | 23      | 18      | E    | 0           | 12600.424    | -0.159                     | 345.1623  |
| 43   | 22     | 21     | 42    | 23      | 20      | A    | 0           | 12631.315    | -0.097                     | 353.8503  |
| 43   | 22     | 22     | 42    | 23      | 19      | A    | 0           | 12631.315    | -0.097                     | 353.8503  |
| 43   | 22     | 22     | 42    | 23      | 20      | E    | 0           | 12636.786    | -0.021                     | 353.8369  |
| 40   | 24     | 16     | 41    | 23      | 19      | A    | 0           | 12642.066    | -0.009                     | 345.1691  |
| 40   | 24     | 17     | 41    | 23      | 18      | A    | 0           | 12642.066    | -0.009                     | 345.1691  |
| 40   | 24     | 17     | 41    | 23      | 19      | E    | 0           | 12643.596    | 0.089                      | 345.1557  |
| 43   | 22     | 21     | 42    | 23      | 19      | E    | 0           | 12676.529    | 0.041                      | 353.8435  |
| 29   | 18     | 11     | 30    | 17      | 13      | E    | 0           | 12858.262    | 0.017                      | 217.9956  |
| 29   | 18     | 12     | 30    | 17      | 14      | E    | 0           | 12877.734    | 0.165                      | 217.9829  |
| 54   | 28     | 26     | 53    | 29      | 24      | E    | 0           | 12889.337    | -0.064                     | 521.8387  |
| 29   | 18     | 11     | 30    | 17      | 14      | A    | 0           | 12907.056    | 0.006                      | 217.9935  |
| 29   | 18     | 12     | 30    | 17      | 13      | A    | 0           | 12907.056    | 0.006                      | 217.9935  |
| 12   | 5      | 8      | 11    | 6       | 5       | E    | 0           | 12949.825    | -0.005                     | 87.7177   |
| 18   | 12     | 7      | 19    | 11      | 9       | E    | 0           | 13081.588    | 0.026                      | 129.4001  |
| 18   | 12     | 6      | 19    | 11      | 8       | E    | 0           | 13094.577    | -0.096                     | 129.4132  |
| 17   | 5      | 12     | 17    | 5       | 13      | E    | 0           | 13143.288    | 0.004                      | 103.8221  |
| 60   | 35     | 26     | 61    | 34      | 27      | A    | 0           | 13191.200    | -0.049                     | 676.3062  |
| 60   | 35     | 25     | 61    | 34      | 28      | A    | 0           | 13191.200    | -0.049                     | 676.3062  |
| 65   | 34     | 32     | 64    | 35      | 30      | E    | 0           | 13206.910    | -0.196                     | 728.3455  |
| 12   | 5      | 8      | 11    | 6       | 5       | E    | 0           | 13210.372    | 0.027                      | 87.7090   |
| 10   | 4      | 6      | 9     | 5       | 5       | A    | 0           | 13229.549    | -0.010                     | 81.2820   |
| 23   | 11     | 12     | 22    | 12      | 11      | A    | 0           | 13336.317    | -0.185                     | 146.7750  |
| 10   | 4      | 6      | 9     | 5       | 5       | E    | 0           | 13350.338    | 0.068                      | 81.2889   |
| 23   | 11     | 12     | 22    | 12      | 10      | E    | 0           | 13370.980    | 0.058                      | 146.7841  |
| 23   | 11     | 13     | 22    | 12      | 11      | E    | 0           | 13385.846    | -0.044                     | 146.7707  |
| 49   | 29     | 21     | 50    | 28      | 23      | E    | 0           | 13472.646    | -0.036                     | 478.8469  |
| 49   | 29     | 21     | 50    | 28      | 22      | A    | 0           | 13493.961    | 0.027                      | 478.8588  |
| 49   | 29     | 20     | 50    | 28      | 23      | A    | 0           | 13493.961    | 0.027                      | 478.8588  |
| 34   | 17     | 18     | 33    | 18      | 15      | A    | 0           | 13532.363    | -0.038                     | 244.4504  |
| 34   | 17     | 17     | 33    | 18      | 16      | A    | 0           | 13532.363    | -0.038                     | 244.4504  |
| 34   | 17     | 18     | 33    | 18      | 16      | E    | 0           | 13563.424    | -0.066                     | 244.4390  |
| 34   | 17     | 17     | 33    | 18      | 15      | E    | 0           | 13581.849    | 0.037                      | 244.4510  |
| 12   | 5      | 7      | 11    | 6       | 5       | E    | 0           | 13657.411    | 0.208                      | 87.7177   |
| 38   | 23     | 15     | 39    | 22      | 17      | E    | 0           | 13735.140    | -0.023                     | 319.9262  |
| 12   | 5      | 7      | 11    | 6       | 6       | A    | 0           | 13750.867    | -0.056                     | 87.7039   |
| 38   | 23     | 16     | 39    | 22      | 18      | E    | 0           | 13775.374    | 0.057                      | 319.9183  |
| 38   | 23     | 16     | 39    | 22      | 17      | A    | 0           | 13779.288    | -0.014                     | 319.9317  |
| 38   | 23     | 15     | 39    | 22      | 18      | A    | 0           | 13779.288    | -0.014                     | 319.9317  |
| 45   | 23     | 22     | 44    | 24      | 20      | E    | 0           | 13830.521    | 0.018                      | 380.6964  |
| 24   | 7      | 17     | 24    | 7       | 18      | A    | 0           | 13855.000    | 0.041                      | 139.1435  |
| 24   | 7      | 17     | 24    | 7       | 18      | E    | 0           | 13877.165    | 0.006                      | 139.1521  |
| 12   | 5      | 7      | 11    | 6       | 6       | E    | 0           | 13917.654    | -0.064                     | 87.7090   |
| 27   | 17     | 10     | 28    | 16      | 12      | E    | 0           | 13987.496    | -0.035                     | 199.5673  |
| 27   | 17     | 11     | 28    | 16      | 13      | E    | 0           | 14001.764    | 0.041                      | 199.5541  |
| 27   | 17     | 11     | 28    | 16      | 12      | A    | 0           | 14035.389    | -0.001                     | 199.5637  |
| 27   | 17     | 10     | 28    | 16      | 13      | A    | 0           | 14035.389    | -0.001                     | 199.5637  |
| 56   | 29     | 27     | 55    | 30      | 25      | E    | 0           | 14043.064    | 0.022                      | 555.4936  |
| 16   | 11     | 6      | 17    | 10      | 8       | E    | 0           | 14192.532    | 0.313                      | 117.7842  |
| 16   | 11     | 5      | 17    | 10      | 7       | E    | 0           | 14210.467    | -0.037                     | 117.7967  |
| 16   | 11     | 5      | 17    | 10      | 8       | A    | 0           | 14240.899    | 0.006                      | 117.7855  |
| 14   | 6      | 9      | 13    | 7       | 6       | A    | 0           | 14363.216    | -0.085                     | 95.3307   |
| 58   | 34     | 24     | 59    | 33      | 26      | E    | 0           | 14379.434    | 0.062                      | 638.6690  |
| 25   | 12     | 14     | 24    | 13      | 11      | A    | 0           | 14485.262    | 0.029                      | 161.2160  |
| 25   | 12     | 13     | 24    | 13      | 11      | E    | 0           | 14523.799    | 0.048                      | 161.2239  |
| 25   | 12     | 14     | 24    | 13      | 12      | E    | 0           | 14533.172    | -0.048                     | 161.2103  |
| 14   | 6      | 8      | 13    | 7       | 6       | E    | 0           | 14548.690    | -0.135                     | 95.3438   |
| 47   | 28     | 20     | 48    | 27      | 21      | E    | 0           | 14608.963    | 0.028                      | 448.0109  |
| 14   | 6      | 8      | 13    | 7       | 7       | A    | 0           | 14614.810    | -0.037                     | 95.3305   |
| 47   | 28     | 19     | 48    | 27      | 22      | A    | 0           | 14634.891    | -0.023                     | 448.0221  |
| 47   | 28     | 20     | 48    | 27      | 21      | A    | 0           | 14634.891    | -0.023                     | 448.0221  |
| 47   | 28     | 19     | 48    | 27      | 22      | E    | 0           | 14657.302    | 0.063                      | 448.0101  |
| 36   | 18     | 18     | 35    | 19      | 17      | A    | 0           | 14687.344    | 0.001                      | 265.7021  |
| 36   | 18     | 19     | 35    | 19      | 16      | A    | 0           | 14687.344    | 0.001                      | 265.7021  |
| 36   | 18     | 19     | 35    | 19      | 17      | E    | 0           | 14713.815    | -0.049                     | 265.6899  |
| 36   | 18     | 18     | 35    | 19      | 16      | E    | 0           | 14737.175    | 0.012                      | 265.7011  |
| 42   | 12     | 30     | 42    | 12      | 31      | E    | 0           | 14850.597    | -0.036                     | 283.5014  |
| 36   | 22     | 14     | 37    | 21      | 16      | E    | 0           | 14867.798    | -0.081                     | 295.8934  |
| 14   | 4      | 10     | 14    | 4       | 11      | A    | 0           | 14889.608    | -0.052                     | 92.0409   |
| 36   | 22     | 15     | 37    | 21      | 17      | E    | 0           | 14904.942    | 0.193                      | 295.8843  |
| 36   | 22     | 14     | 37    | 21      | 17      | A    | 0           | 14914.105    | -0.011                     | 295.8975  |
| 36   | 22     | 15     | 37    | 21      | 16      | A    | 0           | 14914.105    | -0.011                     | 295.8975  |
| 47   | 24     | 24     | 46    | 25      | 22      | E    | 0           | 14939.806    | -0.025                     | 408.7483  |
| 47   | 24     | 23     | 46    | 25      | 22      | A    | 0           | 14945.259    | -0.028                     | 408.7613  |
| 47   | 24     | 24     | 46    | 25      | 21      | A    | 0           | 14945.259    | -0.028                     | 408.7613  |
| 47   | 24     | 23     | 46    | 25      | 21      | E    | 0           | 14984.703    | 0.009                      | 408.7521  |
| 25   | 16     | 9      | 26    | 15      | 11      | E    | 0           | 15113.475    | -0.091                     | 182.3430  |
| 25   | 16     | 10     | 26    | 15      | 12      | E    | 0           | 15122.586    | 0.143                      | 182.3295  |
| 14   | 10     | 5      | 15    | 9       | 7       | E    | 0           | 15295.598    | -0.004                     | 107.3730  |
| 14   | 10     | 4      | 15    | 9       | 6       | E    | 0           | 15319.043    | 0.229                      | 107.3848  |
| 14   | 10     | 4      | 15    | 9       | 7       | A    | 0           | 15344.679    | 0.010                      | 107.3727  |
| 69   | 36     | 33     | 68    | 37      | 32      | A    | 0           | 15532.826    | 0.066                      | 810.4487  |
| 69   | 36     | 34     | 68    | 37      | 31      | A    | 0           | 15532.826    | 0.067                      | 810.4487  |
| 16   | 7      | 10     | 15    | 8       | 7       | A    | 0           | 15551.559    | 0.082                      | 104.1621  |
| 16   | 7      | 9      | 15    | 8       | 7       | E    | 0           | 15616.963    | 0.009                      | 104.1748  |
| 27   | 13     | 15     | 26    | 14      | 12      | A    | 0           | 15635.716    | -0.005                     | 176.8615  |
| 27   | 13     | 14     | 26    | 14      | 12      | E    | 0           | 15677.598    | 0.053                      | 176.8680  |
| 27   | 13     | 15     | 26    | 14      | 13      | E    | 0           | 15681.392    | -0.032                     | 176.8544  |
| 45   | 27     | 18     | 46    | 26      | 20      | E    | 0           | 15743.638    | -0.069                     | 418.3772  |
| 45   | 27     | 19     | 46    | 26      | 20      | A    | 0           | 15774.101    | -0.007                     | 418.3875  |
| 45   | 27     | 18     | 46    | 26      | 21      | A    | 0           | 15774.101    | -0.007                     | 418.3875  |
| 45   | 27     | 19     | 46    | 26      | 21      | E    | 0           | 15791.638    | 0.062                      | 418.3749  |
| 38   | 19     | 20     | 37    | 20      | 17      | A    | 0           | 15843.092    | 0.005                      | 288.1573  |
| 38   | 19     | 19     | 37    | 20      | 18      | A    | 0           | 15843.092    | 0.005                      | 288.1573  |
| 38   | 19     | 20     | 37    | 20      | 18      | E    | 0           | 15864.662    | -0.069                     | 288.1446  |
| 38   | 19     | 19     | 37    | 20      | 17      | E    | 0           | 15892.727    | 0.032                      | 288.1548  |
| 34   | 21     | 13     | 35    | 20      | 15      | E    | 0           | 15998.456    | -0.022                     | 273.0640  |
| 34   | 21     | 14     | 35    | 20      | 16      | E    | 0           | 16031.665    | 0.072                      | 273.0538  |
| 34   | 21     | 14     | 35    | 20      | 15      | A    | 0           | 16046.198    | -0.038                     | 273.0666  |
| 34   | 21     | 13     | 35    | 20      | 16      | A    | 0           | 16046.198    | -0.038                     | 273.0666  |
| 49   | 25     | 25     | 48    | 26      | 23      | E    | 0           | 16092.374    | -0.054                     | 438.0081  |
| 49   | 25     | 25     | 48    | 26      | 22      | A    | 0           | 16103.219    | 0.024                      | 438.0206  |
| 49   | 25     | 24     | 48    | 26      | 23      | A    | 0           | 16103.219    | 0.024                      | 438.0206  |
| 49   | 25     | 24     | 48    | 26      | 22      | E    | 0           | 16138.961    | -0.078                     | 438.0104  |
| 35   | 10     | 25     | 35    | 10      | 26      | E    | 0           | 16153.972    | 0.028                      | 217.9781  |
| 23   | 15     | 8      | 24    | 14      | 10      | E    | 0           | 16235.710    | -0.032                     | 166.3229  |



| $J'$ | $K'_a$ | $K'_c$ | $J''$ | $K''_a$ | $K''_c$ | Sym. | $v_{tCH_3}$ | $\nu_{Obs.}$ | $\nu_{Obs.} - \nu_{Calc.}$ | $E_{low}$ |
|------|--------|--------|-------|---------|---------|------|-------------|--------------|----------------------------|-----------|
| 23   | 15     | 9      | 24    | 14      | 11      | E    | 0           | 16239.254    | 0.063                      | 166.3093  |
| 23   | 15     | 9      | 24    | 14      | 10      | A    | 0           | 16279.910    | 0.001                      | 166.3165  |
| 23   | 15     | 8      | 24    | 14      | 11      | A    | 0           | 16279.910    | 0.001                      | 166.3165  |
| 60   | 31     | 29     | 59    | 32      | 27      | E    | 0           | 16353.040    | 0.026                      | 626.4076  |
| 60   | 31     | 30     | 59    | 32      | 28      | E    | 0           | 16397.484    | -0.039                     | 626.4013  |
| 12   | 9      | 3      | 13    | 8       | 5       | E    | 0           | 16417.464    | -0.020                     | 98.1776   |
| 12   | 9      | 3      | 13    | 8       | 6       | A    | 0           | 16438.477    | -0.035                     | 98.1648   |
| 21   | 6      | 15     | 21    | 6       | 16      | A    | 0           | 16603.624    | -0.031                     | 122.2331  |
| 54   | 32     | 23     | 55    | 31      | 25      | E    | 0           | 16615.858    | 0.076                      | 567.0000  |
| 54   | 32     | 22     | 55    | 31      | 25      | A    | 0           | 16621.315    | -0.050                     | 567.0131  |
| 54   | 32     | 23     | 55    | 31      | 24      | A    | 0           | 16621.315    | -0.050                     | 567.0131  |
| 21   | 6      | 15     | 21    | 6       | 16      | E    | 0           | 16623.735    | 0.052                      | 122.2425  |
| 54   | 32     | 22     | 55    | 31      | 24      | E    | 0           | 16659.835    | 0.079                      | 567.0052  |
| 18   | 8      | 11     | 17    | 9       | 8       | A    | 0           | 16701.689    | -0.018                     | 114.1986  |
| 18   | 8      | 10     | 17    | 9       | 9       | A    | 0           | 16731.501    | -0.029                     | 114.1986  |
| 18   | 8      | 10     | 17    | 9       | 8       | E    | 0           | 16737.801    | 0.022                      | 114.2106  |
| 18   | 8      | 11     | 17    | 9       | 9       | E    | 0           | 16767.657    | 0.004                      | 114.1989  |
| 29   | 14     | 16     | 28    | 15      | 14      | E    | 0           | 16830.324    | 0.002                      | 193.7029  |
| 29   | 14     | 15     | 28    | 15      | 13      | E    | 0           | 16832.080    | 0.023                      | 193.7164  |
| 28   | 8      | 20     | 28    | 8       | 21      | A    | 0           | 16843.189    | 0.038                      | 164.2143  |
| 28   | 8      | 20     | 28    | 8       | 21      | E    | 0           | 16871.954    | 0.040                      | 164.2221  |
| 43   | 26     | 17     | 44    | 25      | 19      | E    | 0           | 16876.773    | -0.094                     | 389.9461  |
| 43   | 26     | 17     | 44    | 25      | 20      | A    | 0           | 16911.418    | 0.091                      | 389.9554  |
| 43   | 26     | 18     | 44    | 25      | 19      | A    | 0           | 16911.418    | 0.091                      | 389.9554  |
| 43   | 26     | 18     | 44    | 25      | 20      | E    | 0           | 16923.788    | 0.089                      | 389.9423  |
| 40   | 20     | 20     | 39    | 21      | 19      | A    | 0           | 16999.575    | 0.001                      | 311.8160  |
| 40   | 20     | 21     | 39    | 21      | 18      | A    | 0           | 16999.575    | 0.001                      | 311.8160  |
| 40   | 20     | 21     | 39    | 21      | 19      | E    | 0           | 17016.053    | -0.044                     | 311.8029  |
| 40   | 20     | 20     | 39    | 21      | 18      | E    | 0           | 17048.413    | 0.059                      | 311.8120  |
| 32   | 20     | 12     | 33    | 19      | 14      | E    | 0           | 17126.614    | -0.047                     | 251.4382  |
| 32   | 20     | 13     | 33    | 19      | 15      | E    | 0           | 17155.673    | 0.079                      | 251.4270  |
| 32   | 20     | 12     | 33    | 19      | 15      | A    | 0           | 17175.550    | 0.210                      | 251.4392  |
| 32   | 20     | 13     | 33    | 19      | 14      | A    | 0           | 17175.550    | 0.210                      | 251.4392  |
| 51   | 26     | 25     | 50    | 27      | 24      | A    | 0           | 17261.588    | -0.082                     | 468.4823  |
| 51   | 26     | 26     | 50    | 27      | 23      | A    | 0           | 17261.588    | -0.082                     | 468.4823  |
| 51   | 26     | 25     | 50    | 27      | 23      | E    | 0           | 17293.605    | 0.076                      | 468.4712  |
| 21   | 14     | 8      | 22    | 13      | 10      | E    | 0           | 17351.294    | 0.017                      | 151.4935  |
| 21   | 14     | 7      | 22    | 13      | 9       | E    | 0           | 17353.214    | -0.083                     | 151.5072  |
| 21   | 14     | 7      | 22    | 13      | 10      | A    | 0           | 17394.770    | 0.006                      | 151.4993  |
| 21   | 14     | 8      | 22    | 13      | 9       | A    | 0           | 17394.770    | 0.006                      | 151.4993  |
| 63   | 37     | 27     | 64    | 36      | 28      | A    | 0           | 17460.554    | -0.052                     | 741.7504  |
| 63   | 37     | 26     | 64    | 36      | 29      | A    | 0           | 17460.554    | -0.052                     | 741.7504  |
| 62   | 32     | 30     | 61    | 33      | 28      | E    | 0           | 17509.174    | -0.150                     | 663.6663  |
| 62   | 32     | 30     | 61    | 33      | 29      | A    | 0           | 17549.469    | -0.014                     | 663.6716  |
| 62   | 32     | 31     | 61    | 33      | 28      | A    | 0           | 17549.469    | -0.014                     | 663.6716  |
| 62   | 32     | 31     | 61    | 33      | 29      | E    | 0           | 17551.643    | 0.168                      | 663.6587  |
| 52   | 31     | 22     | 53    | 30      | 23      | A    | 0           | 17762.027    | 0.069                      | 532.9844  |
| 52   | 31     | 21     | 53    | 30      | 24      | A    | 0           | 17762.027    | 0.069                      | 532.9844  |
| 11   | 4      | 8      | 10    | 5       | 5       | E    | 0           | 17792.367    | 0.003                      | 83.3709   |
| 52   | 31     | 21     | 53    | 30      | 23      | E    | 0           | 17797.543    | 0.508                      | 532.9793  |
| 20   | 9      | 11     | 19    | 10      | 10      | A    | 0           | 17851.596    | -0.071                     | 125.4399  |
| 20   | 9      | 11     | 19    | 10      | 9       | E    | 0           | 17872.385    | 0.018                      | 125.4511  |
| 20   | 9      | 12     | 19    | 10      | 10      | E    | 0           | 17898.528    | 0.038                      | 125.4387  |
| 31   | 15     | 17     | 30    | 16      | 14      | A    | 0           | 17940.222    | -0.002                     | 211.7653  |
| 31   | 15     | 17     | 30    | 16      | 15      | E    | 0           | 17979.737    | -0.066                     | 211.7557  |
| 31   | 15     | 16     | 30    | 16      | 14      | E    | 0           | 17987.145    | 0.044                      | 211.7689  |
| 41   | 25     | 16     | 42    | 24      | 18      | E    | 0           | 18008.424    | 0.164                      | 362.7177  |
| 41   | 25     | 17     | 42    | 24      | 18      | A    | 0           | 18046.336    | -0.025                     | 362.7258  |
| 41   | 25     | 16     | 42    | 24      | 19      | A    | 0           | 18046.336    | -0.025                     | 362.7258  |
| 41   | 25     | 17     | 42    | 24      | 19      | E    | 0           | 18053.317    | -0.144                     | 362.7125  |
| 42   | 21     | 22     | 41    | 22      | 19      | A    | 0           | 18156.745    | -0.004                     | 336.6780  |
| 42   | 21     | 21     | 41    | 22      | 20      | A    | 0           | 18156.745    | -0.004                     | 336.6780  |
| 42   | 21     | 22     | 41    | 22      | 20      | E    | 0           | 18167.913    | -0.057                     | 336.6646  |
| 42   | 21     | 21     | 41    | 22      | 19      | E    | 0           | 18204.230    | 0.130                      | 336.6726  |
| 30   | 19     | 11     | 31    | 18      | 13      | E    | 0           | 18252.029    | -0.036                     | 231.0160  |
| 30   | 19     | 12     | 31    | 18      | 14      | E    | 0           | 18276.465    | 0.019                      | 231.0040  |
| 41   | 16     | 26     | 40    | 17      | 24      | E    | 0           | 75036.095    | 0.004                      | 291.6644  |
| 12   | 5      | 7      | 11    | 5       | 6       | E    | 1           | 75038.251    | -0.085                     | 214.1224  |
| 41   | 16     | 25     | 40    | 17      | 23      | E    | 0           | 75044.426    | 0.029                      | 291.6768  |
| 24   | 7      | 18     | 24    | 6       | 19      | E    | 0           | 75138.393    | -0.002                     | 136.6458  |
| 24   | 7      | 18     | 24    | 6       | 19      | A    | 0           | 75157.338    | 0.029                      | 136.6366  |
| 18   | 3      | 16     | 18    | 2       | 17      | A    | 1           | 75187.642    | 0.028                      | 229.4750  |
| 42   | 11     | 31     | 42    | 10      | 32      | A    | 0           | 75238.403    | -0.026                     | 278.6898  |
| 42   | 11     | 31     | 42    | 10      | 32      | E    | 0           | 75240.264    | 0.002                      | 278.6970  |
| 18   | 2      | 16     | 18    | 1       | 17      | E    | 0           | 75263.149    | 0.026                      | 100.7820  |
| 18   | 2      | 16     | 18    | 1       | 17      | A    | 0           | 75273.990    | 0.050                      | 100.7708  |
| 18   | 2      | 16     | 18    | 1       | 17      | E    | 1           | 75301.894    | -0.008                     | 229.1145  |
| 12   | 5      | 7      | 11    | 5       | 6       | A    | 0           | 75314.342    | -0.003                     | 85.6503   |
| 54   | 23     | 32     | 53    | 24      | 29      | A    | 0           | 75318.349    | -0.023                     | 472.1217  |
| 54   | 23     | 31     | 53    | 24      | 30      | A    | 0           | 75318.349    | -0.023                     | 472.1217  |
| 28   | 9      | 19     | 28    | 8       | 20      | E    | 0           | 75413.889    | -0.037                     | 164.7849  |
| 12   | 2      | 10     | 11    | 2       | 9       | E    | 1           | 75421.412    | -0.045                     | 210.5768  |
| 20   | 3      | 17     | 20    | 2       | 18      | A    | 1           | 75423.272    | 0.078                      | 239.4784  |
| 12   | 2      | 10     | 11    | 2       | 9       | E    | 0           | 75432.986    | 0.011                      | 82.2421   |
| 12   | 2      | 10     | 11    | 2       | 9       | A    | 0           | 75435.765    | 0.006                      | 82.2305   |
| 28   | 9      | 19     | 28    | 8       | 20      | A    | 0           | 75458.047    | 0.014                      | 164.7762  |
| 18   | 3      | 16     | 18    | 2       | 17      | E    | 0           | 75516.513    | 0.014                      | 100.7824  |
| 18   | 3      | 16     | 18    | 2       | 17      | A    | 0           | 75528.013    | 0.022                      | 100.7712  |
| 22   | 8      | 14     | 22    | 7       | 15      | E    | 0           | 75536.962    | -0.026                     | 129.4252  |
| 25   | 7      | 19     | 24    | 8       | 16      | E    | 0           | 75542.562    | -0.004                     | 141.8981  |
| 22   | 8      | 14     | 22    | 7       | 15      | A    | 0           | 75546.573    | 0.035                      | 129.4161  |
| 18   | 3      | 16     | 18    | 2       | 17      | E    | 1           | 75559.993    | -0.022                     | 229.1149  |
| 20   | 3      | 17     | 20    | 2       | 18      | E    | 0           | 75683.362    | 0.041                      | 110.8023  |
| 20   | 3      | 17     | 20    | 2       | 18      | A    | 0           | 75690.837    | 0.055                      | 110.7916  |
| 43   | 17     | 27     | 42    | 18      | 25      | E    | 0           | 76040.560    | -0.010                     | 315.4362  |
| 43   | 17     | 26     | 42    | 18      | 24      | E    | 0           | 76054.664    | 0.022                      | 315.4480  |
| 10   | 3      | 8      | 9     | 2       | 7       | E    | 0           | 76237.950    | -0.010                     | 77.7437   |
| 10   | 3      | 8      | 9     | 2       | 7       | A    | 0           | 76251.134    | 0.012                      | 77.7320   |
| 20   | 4      | 17     | 20    | 3       | 18      | A    | 1           | 76426.775    | 0.078                      | 239.4809  |
| 20   | 4      | 17     | 20    | 3       | 18      | E    | 0           | 76733.238    | 0.032                      | 110.8049  |
| 20   | 4      | 17     | 20    | 3       | 18      | A    | 0           | 76743.393    | 0.029                      | 110.7942  |
| 20   | 4      | 17     | 20    | 3       | 18      | E    | 1           | 76746.197    | -0.023                     | 239.1380  |
| 33   | 10     | 23     | 33    | 9       | 24      | E    | 0           | 76967.194    | -0.043                     | 200.9766  |
| 33   | 10     | 23     | 33    | 9       | 24      | A    | 0           | 77020.561    | -0.002                     | 200.9683  |
| 45   | 18     | 28     | 44    | 19      | 26      | E    | 0           | 77064.736    | 0.001                      | 340.4116  |
| 45   | 18     | 27     | 44    | 19      | 25      | E    | 0           | 77084.321    | 0.050                      | 340.4227  |
| 12   | 4      | 8      | 11    | 4       | 7       | A    | 0           | 77413.967    | 0.001                      | 84.0657   |
| 12   | 4      | 8      | 11    | 4       | 7       | E    | 0           | 77414.958    | 0.014                      | 84.0766   |
| 25   | 5      | 20     | 25    | 4       | 21      | A    | 0           | 77503.316    | 0.022                      | 139.0087  |
| 25   | 5      | 20     | 25    | 4       | 21      | E    | 0           | 77507.395    | 0.043                      | 139.0182  |
| 21   | 8      | 14     | 21    | 7       | 14      | E    | 0           | 77615.515    | -0.096                     | 124.7122  |
| 22   | 5      | 18     | 22    | 4       | 19      | E    | 1           | 77654.080    | -0.052                     | 250.2199  |
| 22   | 5      | 18     | 22    | 4       | 19      | E    | 0           | 77678.694    | 0.024                      | 121.8869  |
| 22   | 5      | 18     | 22    | 4       | 19      | A    | 0           | 77688.182    | 0.036                      | 121.8768  |
| 25   | 7      | 19     | 25    | 6       | 20      | E    | 0           | 77745.338    | 0.006                      | 141.8247  |
| 25   | 7      | 19     | 25    | 6       | 20      | A    | 0           | 77761.539    | 0.025                      | 141.8155  |



| $J'$ | $K'_a$ | $K'_c$ | $J''$ | $K''_a$ | $K''_c$ | Sym. | $v_{tCH_3}$ | $\nu_{Obs.}$ | $\nu_{Obs.} - \nu_{Calc.}$ | $E_{low}$ |
|------|--------|--------|-------|---------|---------|------|-------------|--------------|----------------------------|-----------|
| 44   | 12     | 32     | 44    | 11      | 33      | E    | 0           | 77966.279    | -0.045                     | 300.4739  |
| 38   | 11     | 27     | 38    | 10      | 28      | E    | 0           | 77989.184    | -0.025                     | 242.9660  |
| 44   | 12     | 32     | 44    | 11      | 33      | A    | 0           | 77996.678    | -0.014                     | 300.4667  |
| 38   | 11     | 27     | 38    | 10      | 28      | A    | 0           | 78043.489    | 0.006                      | 242.9581  |
| 21   | 8      | 13     | 21    | 7       | 14      | A    | 0           | 78052.622    | 0.022                      | 124.7032  |
| 13   | 3      | 11     | 12    | 3       | 10      | E    | 0           | 78359.606    | 0.001                      | 84.9558   |
| 13   | 3      | 11     | 12    | 3       | 10      | A    | 0           | 78360.824    | 0.011                      | 84.9446   |
| 32   | 11     | 21     | 31    | 12      | 19      | E    | 0           | 78462.060    | 0.212                      | 197.3702  |
| 45   | 12     | 33     | 45    | 11      | 34      | E    | 0           | 78561.003    | -0.001                     | 310.3969  |
| 45   | 12     | 33     | 45    | 11      | 34      | A    | 0           | 78573.528    | -0.025                     | 310.3899  |
| 11   | 3      | 9      | 10    | 2       | 8       | A    | 0           | 78760.633    | 0.004                      | 79.8884   |
| 24   | 6      | 19     | 24    | 5       | 20      | E    | 0           | 78850.426    | 0.022                      | 134.0156  |
| 24   | 6      | 19     | 24    | 5       | 20      | A    | 0           | 78860.831    | 0.023                      | 134.0060  |
| 14   | 1      | 13     | 13    | 2       | 12      | A    | 1           | 79023.819    | 0.015                      | 214.5549  |
| 14   | 1      | 13     | 13    | 2       | 12      | E    | 1           | 79058.625    | -0.032                     | 214.1874  |
| 14   | 1      | 13     | 13    | 2       | 12      | E    | 0           | 79070.439    | -0.003                     | 85.8529   |
| 14   | 1      | 13     | 13    | 2       | 12      | A    | 0           | 79071.337    | -0.007                     | 85.8415   |
| 14   | 1      | 13     | 13    | 1       | 12      | E    | 1           | 79362.912    | 0.009                      | 214.1773  |
| 15   | 0      | 15     | 14    | 1       | 14      | A    | 1           | 79403.668    | 0.027                      | 215.0754  |
| 15   | 1      | 15     | 14    | 1       | 14      | A    | 1           | 79405.500    | 0.022                      | 215.0754  |
| 15   | 0      | 15     | 14    | 0       | 14      | A    | 1           | 79407.485    | 0.012                      | 215.0753  |
| 15   | 1      | 15     | 14    | 0       | 14      | A    | 1           | 79409.332    | 0.022                      | 215.0753  |
| 15   | 0      | 15     | 14    | 1       | 14      | E    | 1           | 79417.420    | -0.022                     | 214.6974  |
| 15   | 1      | 15     | 14    | 1       | 14      | E    | 1           | 79419.371    | -0.044                     | 214.6974  |
| 15   | 0      | 15     | 14    | 0       | 14      | E    | 1           | 79421.521    | -0.011                     | 214.6973  |
| 15   | 1      | 15     | 14    | 0       | 14      | E    | 1           | 79423.501    | -0.002                     | 214.6973  |
| 15   | 0      | 15     | 14    | 1       | 14      | E    | 0           | 79434.701    | -0.021                     | 86.3650   |
| 15   | 0      | 15     | 14    | 1       | 14      | A    | 0           | 79435.154    | 0.010                      | 86.3533   |
| 15   | 1      | 15     | 14    | 1       | 14      | E    | 0           | 79436.641    | -0.014                     | 86.3650   |
| 15   | 1      | 15     | 14    | 1       | 14      | A    | 0           | 79437.123    | 0.040                      | 86.3533   |
| 15   | 0      | 15     | 14    | 0       | 14      | E    | 0           | 79438.719    | -0.023                     | 86.3649   |
| 15   | 0      | 15     | 14    | 0       | 14      | A    | 0           | 79439.166    | -0.010                     | 86.3532   |
| 15   | 1      | 15     | 14    | 0       | 14      | E    | 0           | 79440.651    | -0.025                     | 86.3649   |
| 15   | 1      | 15     | 14    | 0       | 14      | A    | 0           | 79441.121    | 0.006                      | 86.3532   |
| 14   | 2      | 13     | 13    | 1       | 12      | A    | 1           | 79469.008    | 0.053                      | 214.5453  |
| 14   | 2      | 13     | 13    | 1       | 12      | E    | 0           | 79533.406    | 0.019                      | 85.8428   |
| 14   | 2      | 13     | 13    | 1       | 12      | A    | 0           | 79535.313    | 0.005                      | 85.8314   |
| 28   | 6      | 22     | 28    | 5       | 23      | A    | 0           | 79568.217    | 0.019                      | 158.3724  |
| 28   | 6      | 22     | 28    | 5       | 23      | E    | 0           | 79578.904    | 0.038                      | 158.3814  |
| 43   | 12     | 31     | 43    | 11      | 32      | E    | 0           | 79799.119    | -0.051                     | 290.7362  |
| 24   | 8      | 17     | 24    | 7       | 18      | E    | 0           | 79912.100    | 0.325                      | 139.1521  |
| 23   | 8      | 16     | 23    | 7       | 17      | A    | 0           | 79992.950    | 0.004                      | 134.0836  |
| 40   | 10     | 30     | 40    | 9       | 31      | A    | 0           | 80115.725    | -0.057                     | 257.7720  |
| 40   | 10     | 30     | 40    | 9       | 31      | E    | 0           | 80139.224    | 0.014                      | 257.7791  |
| 22   | 8      | 15     | 22    | 7       | 16      | E    | 0           | 80271.812    | -0.105                     | 129.2426  |
| 25   | 8      | 18     | 25    | 7       | 19      | E    | 0           | 80276.337    | 0.000                      | 144.4180  |
| 25   | 8      | 18     | 25    | 7       | 19      | A    | 0           | 80307.695    | 0.021                      | 144.4093  |
| 19   | 3      | 17     | 19    | 2       | 18      | E    | 0           | 80508.791    | 0.017                      | 104.2820  |
| 19   | 3      | 17     | 19    | 2       | 18      | A    | 0           | 80521.171    | 0.058                      | 104.2708  |
| 19   | 3      | 17     | 19    | 2       | 18      | E    | 1           | 80558.087    | -0.036                     | 232.6139  |
| 21   | 3      | 18     | 21    | 2       | 19      | A    | 1           | 80818.891    | 0.097                      | 243.4852  |
| 26   | 7      | 20     | 26    | 6       | 21      | E    | 0           | 80937.686    | -0.007                     | 147.1849  |
| 13   | 6      | 7      | 12    | 6       | 6       | E    | 0           | 81031.258    | 0.033                      | 90.2061   |
| 21   | 3      | 18     | 21    | 2       | 19      | E    | 0           | 81115.406    | 0.017                      | 114.8120  |
| 21   | 3      | 18     | 21    | 2       | 19      | E    | 1           | 81121.176    | -0.059                     | 243.1446  |
| 21   | 3      | 18     | 21    | 2       | 19      | A    | 0           | 81124.482    | 0.015                      | 114.8014  |
| 26   | 8      | 19     | 26    | 7       | 20      | E    | 0           | 81138.196    | -0.032                     | 149.8846  |
| 13   | 5      | 9      | 12    | 5       | 8       | A    | 0           | 81337.324    | -0.003                     | 88.1401   |
| 19   | 8      | 11     | 19    | 7       | 12      | A    | 0           | 81345.234    | 0.022                      | 116.0067  |
| 13   | 5      | 9      | 12    | 5       | 8       | E    | 0           | 81346.905    | 0.001                      | 88.1496   |
| 12   | 3      | 10     | 11    | 2       | 9       | E    | 0           | 81355.285    | -0.039                     | 82.2421   |
| 14   | 2      | 12     | 13    | 3       | 11      | A    | 0           | 81357.985    | -0.004                     | 87.5585   |
| 14   | 2      | 12     | 13    | 3       | 11      | E    | 0           | 81361.006    | -0.014                     | 87.5696   |
| 12   | 3      | 10     | 11    | 2       | 9       | A    | 0           | 81366.490    | -0.009                     | 82.2305   |
| 21   | 4      | 18     | 21    | 3       | 19      | A    | 1           | 81401.265    | 0.074                      | 243.4865  |
| 20   | 8      | 13     | 20    | 7       | 14      | A    | 0           | 81501.159    | 0.026                      | 120.1788  |
| 21   | 4      | 18     | 21    | 3       | 19      | E    | 0           | 81726.923    | 0.021                      | 114.8134  |
| 46   | 12     | 34     | 46    | 11      | 35      | A    | 0           | 81735.681    | -0.121                     | 320.4769  |
| 21   | 4      | 18     | 21    | 3       | 19      | A    | 0           | 81737.723    | 0.043                      | 114.8028  |
| 21   | 4      | 18     | 21    | 3       | 19      | E    | 1           | 81745.872    | -0.063                     | 243.1460  |
| 15   | 3      | 12     | 14    | 4       | 11      | A    | 0           | 82021.352    | -0.034                     | 92.0409   |
| 15   | 3      | 12     | 14    | 4       | 11      | E    | 0           | 82035.935    | 0.024                      | 92.0516   |
| 13   | 5      | 8      | 12    | 5       | 7       | E    | 0           | 82085.889    | 0.223                      | 88.1732   |
| 13   | 5      | 8      | 12    | 5       | 7       | A    | 0           | 82093.162    | -0.009                     | 88.1625   |
| 32   | 10     | 22     | 32    | 9       | 23      | E    | 0           | 82100.572    | -0.038                     | 193.7155  |
| 32   | 10     | 22     | 32    | 9       | 23      | A    | 0           | 82152.460    | 0.007                      | 193.7074  |
| 19   | 8      | 12     | 19    | 7       | 13      | A    | 0           | 82162.565    | 0.016                      | 115.9771  |
| 42   | 16     | 27     | 41    | 17      | 25      | E    | 0           | 82368.244    | -0.025                     | 300.2157  |
| 42   | 16     | 26     | 41    | 17      | 24      | E    | 0           | 82375.796    | 0.044                      | 300.2281  |
| 18   | 8      | 10     | 18    | 7       | 11      | A    | 0           | 82395.402    | 0.028                      | 112.0083  |
| 19   | 5      | 14     | 18    | 6       | 13      | A    | 0           | 82459.816    | -0.013                     | 109.6336  |
| 18   | 8      | 10     | 18    | 7       | 11      | E    | 0           | 82465.921    | -0.003                     | 112.0182  |
| 23   | 5      | 19     | 23    | 4       | 20      | E    | 1           | 82522.972    | -0.069                     | 254.7385  |
| 23   | 5      | 19     | 23    | 4       | 20      | E    | 0           | 82539.263    | 0.024                      | 126.4059  |
| 23   | 5      | 19     | 23    | 4       | 20      | A    | 0           | 82548.828    | 0.031                      | 126.3959  |
| 27   | 8      | 20     | 27    | 7       | 21      | E    | 0           | 82572.330    | -0.013                     | 155.5469  |
| 27   | 8      | 20     | 27    | 7       | 21      | A    | 0           | 82595.593    | 0.017                      | 155.5384  |
| 18   | 8      | 11     | 18    | 7       | 12      | E    | 0           | 82663.007    | -0.045                     | 112.0009  |
| 18   | 8      | 11     | 18    | 7       | 12      | A    | 0           | 82799.618    | 0.013                      | 111.9938  |
| 37   | 11     | 26     | 37    | 10      | 27      | E    | 0           | 83013.433    | -0.065                     | 234.5613  |
| 37   | 11     | 26     | 37    | 10      | 27      | A    | 0           | 83072.869    | 0.023                      | 234.5535  |
| 17   | 8      | 9      | 17    | 7       | 10      | A    | 0           | 83192.080    | 0.039                      | 108.2353  |
| 17   | 8      | 9      | 17    | 7       | 10      | E    | 0           | 83239.924    | -0.020                     | 108.2462  |
| 17   | 8      | 10     | 17    | 7       | 11      | E    | 0           | 83267.192    | -0.008                     | 108.2346  |
| 18   | 1      | 17     | 18    | 0       | 18      | A    | 1           | 83282.270    | -0.055                     | 226.6967  |
| 25   | 6      | 20     | 25    | 5       | 21      | E    | 0           | 83315.578    | 0.017                      | 139.0455  |
| 25   | 6      | 20     | 25    | 5       | 21      | A    | 0           | 83325.148    | 0.033                      | 139.0361  |
| 44   | 17     | 28     | 43    | 18      | 26      | E    | 0           | 83325.835    | -0.002                     | 324.4005  |
| 44   | 17     | 27     | 43    | 18      | 25      | E    | 0           | 83339.242    | 0.053                      | 324.4123  |
| 17   | 8      | 10     | 17    | 7       | 11      | A    | 0           | 83380.380    | 0.012                      | 108.2286  |
| 26   | 9      | 17     | 26    | 8       | 18      | E    | 0           | 83566.768    | -0.036                     | 152.8260  |
| 26   | 9      | 17     | 26    | 8       | 18      | A    | 0           | 83588.862    | 0.017                      | 152.8177  |
| 42   | 12     | 30     | 42    | 11      | 31      | E    | 0           | 83642.782    | -0.033                     | 281.2068  |
| 18   | 1      | 17     | 18    | 0       | 18      | E    | 0           | 83680.658    | 0.016                      | 97.9907   |
| 18   | 2      | 17     | 18    | 1       | 18      | E    | 0           | 83691.945    | 0.035                      | 97.9908   |
| 18   | 1      | 17     | 18    | 0       | 18      | A    | 0           | 83695.308    | 0.053                      | 97.9791   |
| 42   | 12     | 30     | 42    | 11      | 31      | A    | 0           | 83700.824    | 0.014                      | 281.1995  |
| 48   | 13     | 35     | 48    | 12      | 36      | E    | 0           | 83705.463    | -0.016                     | 344.2577  |
| 18   | 2      | 17     | 18    | 1       | 18      | A    | 0           | 83706.620    | 0.062                      | 97.9791   |
| 14   | 3      | 12     | 13    | 3       | 11      | A    | 1           | 83721.009    | 0.008                      | 216.2636  |
| 48   | 13     | 35     | 48    | 12      | 36      | A    | 0           | 83734.961    | -0.025                     | 344.2511  |
| 18   | 1      | 17     | 18    | 0       | 18      | E    | 1           | 83760.308    | 0.017                      | 226.3205  |
| 18   | 2      | 17     | 18    | 1       | 18      | E    | 1           | 83771.829    | 0.001                      | 226.3205  |
| 14   | 3      | 12     | 13    | 3       | 11      | E    | 0           | 83786.192    | -0.000                     | 87.5696   |
| 14   | 3      | 12     | 13    | 3       | 11      | A    | 0           | 83787.692    | 0.011                      | 87.5585   |
| 14   | 3      | 12     | 13    | 3       | 11      | E    | 1           | 83792.052    | -0.021                     | 215.9041  |



| $J'$ | $K'_a$ | $K'_c$ | $J''$ | $K''_a$ | $K''_c$ | Sym. | $v_{tCH_3}$ | $\nu_{Obs.}$ | $\nu_{Obs.} - \nu_{Calc.}$ | $E_{low}$ |
|------|--------|--------|-------|---------|---------|------|-------------|--------------|----------------------------|-----------|
| 16   | 8      | 9      | 16    | 7       | 10      | E    | 0           | 83804.571    | -0.013                     | 104.6857  |
| 16   | 8      | 8      | 16    | 7       | 9       | A    | 0           | 83806.766    | 0.053                      | 104.6838  |
| 16   | 8      | 8      | 16    | 7       | 9       | E    | 0           | 83826.409    | -0.023                     | 104.6958  |
| 16   | 8      | 9      | 16    | 7       | 10      | A    | 0           | 83889.001    | 0.006                      | 104.6809  |
| 26   | 5      | 21     | 26    | 4       | 22      | E    | 1           | 84119.392    | -0.191                     | 272.5624  |
| 15   | 1      | 14     | 14    | 2       | 13      | A    | 1           | 84245.730    | 0.014                      | 217.1961  |
| 26   | 5      | 21     | 26    | 4       | 22      | A    | 0           | 84248.935    | 0.030                      | 144.2223  |
| 26   | 5      | 21     | 26    | 4       | 22      | E    | 0           | 84249.796    | 0.037                      | 144.2317  |
| 15   | 8      | 8      | 15    | 7       | 9       | E    | 0           | 84256.454    | 0.005                      | 101.3535  |
| 13   | 3      | 11     | 12    | 2       | 10      | E    | 0           | 84281.934    | -0.018                     | 84.7582   |
| 15   | 1      | 14     | 14    | 2       | 13      | E    | 1           | 84284.531    | -0.023                     | 216.8300  |
| 15   | 8      | 7      | 15    | 7       | 8       | A    | 0           | 84287.633    | 0.020                      | 101.3506  |
| 15   | 8      | 7      | 15    | 7       | 8       | E    | 0           | 84288.024    | 0.002                      | 101.3633  |
| 13   | 3      | 11     | 12    | 2       | 10      | A    | 0           | 84291.546    | -0.006                     | 84.7468   |
| 15   | 1      | 14     | 14    | 2       | 13      | E    | 0           | 84297.121    | -0.005                     | 88.4958   |
| 15   | 1      | 14     | 14    | 2       | 13      | A    | 0           | 84298.222    | -0.005                     | 88.4844   |
| 46   | 18     | 29     | 45    | 19      | 27      | E    | 0           | 84309.876    | 0.002                      | 349.7890  |
| 15   | 8      | 8      | 15    | 7       | 9       | A    | 0           | 84321.106    | 0.002                      | 101.3494  |
| 15   | 2      | 14     | 14    | 2       | 13      | A    | 1           | 84327.159    | 0.005                      | 217.1961  |
| 46   | 18     | 28     | 45    | 19      | 26      | E    | 0           | 84328.816    | 0.034                      | 349.8000  |
| 15   | 2      | 14     | 14    | 2       | 13      | E    | 1           | 84371.005    | -0.023                     | 216.8300  |
| 15   | 2      | 14     | 14    | 2       | 13      | E    | 0           | 84382.276    | -0.005                     | 88.4958   |
| 15   | 2      | 14     | 14    | 2       | 13      | A    | 0           | 84383.592    | -0.004                     | 88.4844   |
| 15   | 1      | 14     | 14    | 1       | 13      | A    | 1           | 84400.803    | 0.005                      | 217.1909  |
| 17   | 4      | 13     | 16    | 5       | 12      | A    | 0           | 84409.836    | -0.001                     | 100.2619  |
| 17   | 4      | 13     | 16    | 5       | 12      | E    | 0           | 84437.048    | 0.039                      | 100.2720  |
| 15   | 1      | 14     | 14    | 1       | 13      | E    | 1           | 84448.210    | -0.012                     | 216.8245  |
| 15   | 1      | 14     | 14    | 1       | 13      | E    | 0           | 84458.750    | -0.004                     | 88.4904   |
| 15   | 1      | 14     | 14    | 1       | 13      | A    | 0           | 84460.226    | -0.005                     | 88.4790   |
| 15   | 2      | 14     | 14    | 1       | 13      | A    | 1           | 84482.245    | 0.011                      | 217.1909  |
| 16   | 0      | 16     | 15    | 1       | 15      | A    | 1           | 84534.101    | 0.021                      | 217.7241  |
| 15   | 2      | 14     | 14    | 1       | 13      | E    | 1           | 84534.666    | -0.030                     | 216.8245  |
| 16   | 0      | 16     | 15    | 0       | 15      | A    | 1           | 84535.928    | 0.011                      | 217.7240  |
| 16   | 1      | 16     | 15    | 0       | 15      | A    | 1           | 84536.811    | 0.018                      | 217.7240  |
| 15   | 2      | 14     | 14    | 1       | 13      | E    | 0           | 84543.909    | 0.000                      | 88.4904   |
| 15   | 2      | 14     | 14    | 1       | 13      | A    | 0           | 84545.581    | -0.020                     | 88.4790   |
| 16   | 0      | 16     | 15    | 1       | 15      | E    | 1           | 84547.827    | -0.019                     | 217.3465  |
| 16   | 1      | 16     | 15    | 1       | 15      | E    | 1           | 84548.770    | -0.020                     | 217.3465  |
| 16   | 0      | 16     | 15    | 0       | 15      | E    | 1           | 84549.802    | -0.015                     | 217.3465  |
| 16   | 1      | 16     | 15    | 0       | 15      | E    | 1           | 84550.737    | -0.021                     | 217.3465  |
| 16   | 0      | 16     | 15    | 1       | 15      | E    | 0           | 84566.439    | -0.031                     | 89.0148   |
| 16   | 0      | 16     | 15    | 1       | 15      | A    | 0           | 84566.905    | 0.013                      | 89.0030   |
| 16   | 1      | 16     | 15    | 1       | 15      | E    | 0           | 84567.378    | -0.015                     | 89.0148   |
| 16   | 1      | 16     | 15    | 1       | 15      | A    | 0           | 84567.831    | 0.012                      | 89.0030   |
| 16   | 0      | 16     | 15    | 0       | 15      | E    | 0           | 84568.374    | -0.029                     | 89.0147   |
| 16   | 0      | 16     | 15    | 0       | 15      | A    | 0           | 84568.827    | -0.004                     | 89.0030   |
| 16   | 1      | 16     | 15    | 0       | 15      | E    | 0           | 84569.306    | -0.021                     | 89.0147   |
| 16   | 1      | 16     | 15    | 0       | 15      | A    | 0           | 84569.767    | 0.009                      | 89.0030   |
| 28   | 8      | 21     | 28    | 7       | 22      | E    | 0           | 84622.399    | 0.006                      | 161.3994  |
| 49   | 13     | 36     | 49    | 12      | 37      | E    | 0           | 84624.877    | -0.020                     | 98.2368   |
| 14   | 8      | 7      | 14    | 7       | 8       | A    | 0           | 84650.999    | -0.034                     | 355.0585  |
| 14   | 8      | 6      | 14    | 7       | 7       | E    | 0           | 84657.555    | -0.023                     | 98.2465   |
| 27   | 7      | 21     | 27    | 6       | 22      | E    | 0           | 84662.368    | 0.013                      | 152.7229  |
| 27   | 7      | 21     | 27    | 6       | 22      | A    | 0           | 84674.107    | 0.019                      | 152.7139  |
| 14   | 8      | 7      | 14    | 7       | 8       | A    | 0           | 84679.464    | -0.012                     | 98.2331   |
| 13   | 4      | 9      | 12    | 4       | 8       | A    | 0           | 84687.223    | 0.007                      | 86.6479   |
| 13   | 4      | 9      | 12    | 4       | 8       | E    | 0           | 84688.740    | -0.009                     | 86.6589   |
| 31   | 10     | 22     | 30    | 11      | 19      | A    | 0           | 84826.471    | -0.023                     | 186.7043  |
| 13   | 8      | 6      | 13    | 7       | 9       | E    | 0           | 84920.567    | -0.004                     | 95.3340   |
| 13   | 8      | 5      | 13    | 7       | 6       | E    | 0           | 84952.925    | -0.038                     | 95.3438   |
| 20   | 2      | 18     | 20    | 1       | 19      | A    | 1           | 85062.410    | 0.009                      | 236.6411  |
| 13   | 3      | 10     | 12    | 3       | 9       | E    | 1           | 85097.432    | -0.022                     | 214.0294  |
| 13   | 3      | 10     | 12    | 3       | 9       | A    | 1           | 85101.501    | 0.031                      | 214.3907  |
| 20   | 3      | 18     | 20    | 2       | 19      | A    | 1           | 85132.926    | -0.002                     | 236.6412  |
| 14   | 2      | 12     | 13    | 2       | 11      | A    | 1           | 85146.507    | 0.020                      | 216.1379  |
| 12   | 8      | 5      | 12    | 7       | 6       | E    | 0           | 85154.723    | 0.002                      | 92.6439   |
| 13   | 3      | 10     | 12    | 3       | 9       | E    | 0           | 85170.490    | -0.022                     | 85.6920   |
| 13   | 3      | 10     | 12    | 3       | 9       | A    | 0           | 85171.686    | 0.013                      | 85.6806   |
| 12   | 8      | 4      | 12    | 7       | 5       | E    | 0           | 85186.689    | -0.026                     | 92.6537   |
| 14   | 2      | 12     | 13    | 2       | 11      | E    | 1           | 85244.329    | -0.018                     | 215.7743  |
| 14   | 2      | 12     | 13    | 2       | 11      | E    | 0           | 85245.092    | -0.020                     | 87.4400   |
| 14   | 2      | 12     | 13    | 2       | 11      | A    | 0           | 85248.458    | 0.003                      | 87.4287   |
| 48   | 19     | 30     | 47    | 20      | 28      | E    | 0           | 85315.340    | 0.005                      | 376.3810  |
| 11   | 8      | 4      | 11    | 7       | 5       | E    | 0           | 85337.390    | 0.018                      | 90.1652   |
| 48   | 19     | 29     | 47    | 20      | 27      | E    | 0           | 85339.483    | 0.048                      | 376.3911  |
| 47   | 13     | 34     | 47    | 12      | 35      | E    | 0           | 85346.326    | -0.023                     | 333.6314  |
| 11   | 8      | 3      | 11    | 7       | 4       | E    | 0           | 85369.027    | -0.012                     | 90.1751   |
| 47   | 13     | 34     | 47    | 12      | 35      | A    | 0           | 85393.480    | -0.010                     | 333.6246  |
| 20   | 2      | 18     | 20    | 1       | 19      | E    | 0           | 85434.231    | 0.025                      | 107.9525  |
| 20   | 2      | 18     | 20    | 1       | 19      | A    | 0           | 85447.241    | 0.046                      | 107.9414  |
| 10   | 8      | 3      | 10    | 7       | 4       | E    | 0           | 85477.198    | -0.045                     | 87.8967   |
| 20   | 3      | 18     | 20    | 2       | 19      | A    | 0           | 85521.902    | 0.054                      | 107.9415  |
| 10   | 8      | 3      | 10    | 7       | 4       | A    | 0           | 85524.545    | 0.004                      | 87.8934   |
| 24   | 7      | 17     | 23    | 8       | 16      | A    | 0           | 85553.905    | -0.020                     | 136.7519  |
| 20   | 3      | 18     | 20    | 2       | 19      | E    | 1           | 85563.728    | -0.018                     | 236.2839  |
| 24   | 7      | 17     | 23    | 8       | 16      | E    | 0           | 85623.177    | 0.059                      | 136.7590  |
| 61   | 26     | 36     | 60    | 27      | 34      | E    | 0           | 85664.550    | 0.022                      | 583.5202  |
| 61   | 26     | 35     | 60    | 27      | 34      | A    | 0           | 85675.545    | 0.005                      | 583.5317  |
| 61   | 26     | 36     | 60    | 27      | 33      | A    | 0           | 85675.545    | 0.005                      | 583.5317  |
| 33   | 11     | 23     | 32    | 12      | 20      | A    | 0           | 85787.523    | -0.013                     | 204.0709  |
| 22   | 3      | 19     | 22    | 2       | 20      | A    | 1           | 86085.115    | 0.089                      | 247.6623  |
| 24   | 4      | 20     | 24    | 3       | 21      | E    | 1           | 86210.566    | -0.077                     | 259.4242  |
| 24   | 4      | 20     | 24    | 3       | 21      | E    | 0           | 86251.245    | 0.033                      | 131.0922  |
| 24   | 4      | 20     | 24    | 3       | 21      | A    | 0           | 86257.520    | 0.050                      | 131.0823  |
| 50   | 20     | 30     | 49    | 21      | 29      | A    | 0           | 86315.411    | -0.016                     | 404.1886  |
| 14   | 10     | 4      | 13    | 10      | 3       | A    | 0           | 86388.940    | 0.034                      | 105.0030  |
| 14   | 10     | 5      | 13    | 10      | 4       | A    | 0           | 86388.940    | 0.034                      | 105.0030  |
| 14   | 10     | 4      | 13    | 10      | 3       | E    | 0           | 86388.940    | -0.112                     | 105.0141  |
| 14   | 10     | 5      | 13    | 10      | 4       | E    | 0           | 86389.446    | 0.042                      | 105.0016  |
| 22   | 3      | 19     | 22    | 2       | 20      | E    | 0           | 86414.136    | 0.025                      | 118.9921  |
| 22   | 4      | 19     | 22    | 3       | 20      | A    | 1           | 86416.018    | 0.098                      | 247.6630  |
| 22   | 3      | 19     | 22    | 2       | 20      | A    | 0           | 86424.623    | 0.039                      | 118.9816  |
| 22   | 3      | 19     | 22    | 2       | 20      | E    | 1           | 86430.214    | -0.039                     | 247.3242  |
| 28   | 8      | 21     | 27    | 9       | 18      | A    | 0           | 86492.049    | -0.028                     | 161.3293  |
| 28   | 8      | 21     | 27    | 9       | 18      | E    | 0           | 86506.246    | 0.025                      | 161.3366  |
| 14   | 9      | 5      | 13    | 9       | 4       | A    | 0           | 86528.393    | 0.025                      | 101.3902  |
| 14   | 9      | 5      | 13    | 9       | 4       | E    | 0           | 86528.393    | -0.087                     | 101.4022  |
| 14   | 9      | 6      | 13    | 9       | 5       | E    | 0           | 86529.023    | -0.006                     | 101.3904  |
| 35   | 12     | 24     | 34    | 13      | 21      | A    | 0           | 86554.784    | -0.080                     | 222.6450  |
| 25   | 9      | 16     | 25    | 8       | 17      | A    | 0           | 86590.414    | 0.011                      | 147.2281  |
| 25   | 9      | 16     | 25    | 8       | 17      | E    | 0           | 86592.033    | -0.038                     | 147.2363  |
| 14   | 8      | 6      | 13    | 8       | 5       | A    | 0           | 86725.791    | -0.138                     | 98.1648   |
| 14   | 8      | 6      | 13    | 8       | 5       | E    | 0           | 86725.791    | -0.027                     | 98.1776   |
| 14   | 8      | 7      | 13    | 8       | 6       | E    | 0           | 86726.676    | -0.007                     | 98.1666   |
| 35   | 12     | 24     | 34    | 13      | 22      | E    | 0           | 86730.230    | -0.049                     | 222.6398  |
| 22   | 4      | 19     | 22    | 3       | 20      | E    | 0           | 86762.792    | 0.028                      | 118.9928  |



| $J'$ | $K'_a$ | $K'_c$ | $J''$ | $K''_a$ | $K''_c$ | Sym. | $v_{tCH_3}$ | $\nu_{Obs.}$ | $\nu_{Obs.} - \nu_{Calc.}$ | $E_{low}$ |
|------|--------|--------|-------|---------|---------|------|-------------|--------------|----------------------------|-----------|
| 14   | 4      | 11     | 13    | 4       | 10      | A    | 1           | 86771.588    | 0.011                      | 217.8399  |
| 22   | 4      | 19     | 22    | 3       | 20      | A    | 0           | 86774.319    | 0.042                      | 118.9823  |
| 33   | 11     | 22     | 32    | 12      | 21      | A    | 0           | 86782.526    | -0.021                     | 204.0694  |
| 63   | 27     | 37     | 62    | 28      | 34      | A    | 0           | 86786.314    | -0.016                     | 619.3290  |
| 63   | 27     | 36     | 62    | 28      | 35      | A    | 0           | 86786.314    | -0.016                     | 619.3290  |
| 22   | 4      | 19     | 22    | 3       | 20      | E    | 1           | 86787.486    | -0.049                     | 247.3250  |
| 29   | 6      | 23     | 29    | 5       | 24      | E    | 1           | 86803.657    | -0.245                     | 292.6170  |
| 14   | 4      | 11     | 13    | 4       | 10      | E    | 0           | 86827.185    | -0.031                     | 89.1553   |
| 14   | 4      | 11     | 13    | 4       | 10      | A    | 0           | 86827.615    | 0.030                      | 89.1446   |
| 35   | 12     | 23     | 34    | 13      | 21      | E    | 0           | 86860.553    | 0.140                      | 222.6529  |
| 35   | 12     | 23     | 34    | 13      | 22      | A    | 0           | 86937.154    | -0.006                     | 222.6444  |
| 31   | 10     | 21     | 31    | 9       | 22      | E    | 0           | 86998.891    | -0.044                     | 186.7160  |
| 14   | 7      | 8      | 13    | 7       | 7       | A    | 0           | 87016.898    | 0.040                      | 95.3305   |
| 29   | 6      | 23     | 29    | 5       | 24      | A    | 0           | 87017.771    | 0.021                      | 164.2807  |
| 14   | 7      | 7      | 13    | 7       | 6       | E    | 0           | 87021.203    | 0.000                      | 95.3438   |
| 14   | 7      | 8      | 13    | 7       | 7       | E    | 0           | 87022.361    | 0.003                      | 95.3340   |
| 29   | 6      | 23     | 29    | 5       | 24      | E    | 0           | 87024.989    | 0.028                      | 164.2895  |
| 31   | 10     | 21     | 31    | 9       | 22      | A    | 0           | 87044.275    | 0.025                      | 186.7082  |
| 24   | 5      | 20     | 24    | 4       | 21      | A    | 1           | 87210.841    | 0.195                      | 259.7470  |
| 37   | 13     | 25     | 36    | 14      | 22      | A    | 0           | 87292.956    | -0.040                     | 242.4250  |
| 31   | 10     | 21     | 30    | 11      | 20      | A    | 0           | 87295.960    | -0.026                     | 186.6998  |
| 29   | 8      | 22     | 29    | 7       | 23      | E    | 0           | 87296.498    | 0.005                      | 167.4373  |
| 29   | 8      | 22     | 29    | 7       | 23      | A    | 0           | 87313.157    | 0.022                      | 167.4289  |
| 47   | 12     | 35     | 47    | 11      | 36      | A    | 0           | 87365.822    | -0.059                     | 330.7104  |
| 52   | 21     | 32     | 51    | 22      | 30      | E    | 0           | 87376.190    | -0.008                     | 433.1745  |
| 47   | 12     | 35     | 47    | 11      | 36      | E    | 0           | 87387.262    | -0.012                     | 330.7165  |
| 37   | 13     | 25     | 36    | 14      | 23      | E    | 0           | 87408.159    | -0.004                     | 242.4186  |
| 37   | 13     | 24     | 36    | 14      | 22      | E    | 0           | 87418.641    | 0.035                      | 242.4318  |
| 14   | 6      | 9      | 13    | 6       | 8       | A    | 0           | 87431.155    | 0.009                      | 92.8934   |
| 37   | 13     | 24     | 36    | 14      | 23      | A    | 0           | 87434.675    | 0.009                      | 242.4248  |
| 14   | 6      | 9      | 13    | 6       | 8       | E    | 0           | 87465.184    | 0.007                      | 92.8998   |
| 14   | 3      | 12     | 13    | 2       | 11      | A    | 1           | 87492.277    | 0.021                      | 216.1379  |
| 24   | 5      | 20     | 24    | 4       | 21      | E    | 1           | 87519.144    | -0.077                     | 259.4281  |
| 24   | 5      | 20     | 24    | 4       | 21      | E    | 0           | 87529.286    | 0.022                      | 131.0960  |
| 24   | 5      | 20     | 24    | 4       | 21      | A    | 0           | 87539.201    | 0.038                      | 131.0860  |
| 14   | 6      | 8      | 13    | 6       | 7       | E    | 0           | 87543.494    | -0.034                     | 92.9090   |
| 44   | 11     | 33     | 44    | 10      | 34      | A    | 0           | 87573.157    | -0.053                     | 297.5455  |
| 14   | 6      | 8      | 13    | 6       | 7       | A    | 0           | 87575.834    | -0.002                     | 92.8968   |
| 44   | 11     | 33     | 44    | 10      | 34      | E    | 0           | 87601.673    | -0.003                     | 297.5518  |
| 15   | 2      | 13     | 14    | 3       | 12      | A    | 1           | 87646.470    | 0.003                      | 219.0563  |
| 15   | 2      | 13     | 14    | 3       | 12      | E    | 1           | 87649.152    | -0.055                     | 218.6991  |
| 15   | 2      | 13     | 14    | 3       | 12      | A    | 0           | 87663.075    | -0.005                     | 90.3533   |
| 15   | 2      | 13     | 14    | 3       | 12      | E    | 0           | 87664.376    | -0.001                     | 90.3644   |
| 14   | 3      | 12     | 13    | 2       | 11      | E    | 0           | 87670.265    | -0.019                     | 87.4400   |
| 14   | 3      | 12     | 13    | 2       | 11      | A    | 0           | 87678.153    | 0.007                      | 87.4287   |
| 14   | 3      | 12     | 13    | 2       | 11      | E    | 1           | 87684.087    | 0.021                      | 215.7743  |
| 14   | 5      | 10     | 13    | 5       | 9       | A    | 0           | 87720.425    | 0.003                      | 90.8532   |
| 14   | 5      | 10     | 13    | 5       | 9       | E    | 0           | 87724.858    | 0.001                      | 90.8631   |
| 26   | 6      | 21     | 26    | 5       | 22      | E    | 1           | 88010.008    | -0.071                     | 272.5787  |
| 26   | 6      | 21     | 26    | 5       | 22      | E    | 0           | 88059.111    | 0.012                      | 144.2475  |
| 26   | 6      | 21     | 26    | 5       | 22      | A    | 0           | 88068.240    | 0.028                      | 144.2382  |
| 39   | 14     | 25     | 38    | 15      | 24      | A    | 0           | 88114.913    | 0.028                      | 263.4102  |
| 39   | 14     | 25     | 38    | 15      | 23      | E    | 0           | 88137.136    | 0.036                      | 263.4157  |
| 39   | 14     | 26     | 38    | 15      | 24      | E    | 0           | 88140.333    | 0.011                      | 263.4027  |
| 19   | 1      | 18     | 19    | 0       | 19      | A    | 1           | 88218.710    | -0.062                     | 230.0297  |
| 50   | 13     | 37     | 50    | 12      | 38      | A    | 0           | 88262.364    | -0.061                     | 366.0249  |
| 50   | 13     | 37     | 50    | 12      | 38      | E    | 0           | 88271.707    | -0.007                     | 366.0307  |
| 41   | 10     | 31     | 41    | 9       | 32      | A    | 0           | 88329.348    | -0.050                     | 266.5365  |
| 41   | 10     | 31     | 41    | 9       | 32      | E    | 0           | 88359.754    | 0.004                      | 266.5431  |
| 32   | 7      | 25     | 32    | 6       | 26      | E    | 1           | 88379.287    | -0.286                     | 314.8840  |
| 54   | 22     | 33     | 53    | 23      | 30      | A    | 0           | 88414.535    | -0.009                     | 463.3882  |
| 54   | 22     | 33     | 53    | 23      | 31      | E    | 0           | 88426.427    | 0.034                      | 463.3755  |
| 36   | 11     | 25     | 36    | 10      | 26      | E    | 0           | 88535.373    | -0.055                     | 226.4073  |
| 36   | 11     | 25     | 36    | 10      | 26      | A    | 0           | 88594.532    | 0.007                      | 226.3998  |
| 19   | 1      | 18     | 19    | 0       | 19      | E    | 0           | 88642.048    | 0.014                      | 101.3250  |
| 19   | 2      | 18     | 19    | 1       | 19      | E    | 0           | 88647.714    | 0.019                      | 101.3250  |
| 19   | 1      | 18     | 19    | 0       | 19      | A    | 0           | 88657.634    | 0.044                      | 101.3134  |
| 19   | 2      | 18     | 19    | 1       | 19      | A    | 0           | 88663.319    | 0.048                      | 101.3134  |
| 32   | 7      | 25     | 32    | 6       | 26      | A    | 0           | 88690.572    | 0.012                      | 186.5531  |
| 32   | 7      | 25     | 32    | 6       | 26      | E    | 0           | 88705.158    | 0.031                      | 186.5612  |
| 19   | 1      | 18     | 19    | 0       | 19      | E    | 1           | 88727.600    | 0.016                      | 229.6540  |
| 19   | 2      | 18     | 19    | 1       | 19      | E    | 1           | 88733.420    | 0.023                      | 229.6540  |
| 28   | 7      | 22     | 28    | 6       | 23      | E    | 0           | 88843.632    | 0.001                      | 158.4359  |
| 28   | 7      | 22     | 28    | 6       | 23      | A    | 0           | 88853.777    | -0.004                     | 158.4271  |
| 41   | 12     | 29     | 41    | 11      | 30      | E    | 0           | 88869.091    | -0.030                     | 271.9083  |
| 41   | 15     | 26     | 40    | 16      | 25      | A    | 0           | 88901.453    | 0.038                      | 285.6002  |
| 35   | 8      | 27     | 35    | 7       | 28      | E    | 1           | 88904.073    | -0.369                     | 339.3514  |
| 24   | 9      | 15     | 24    | 8       | 16      | A    | 0           | 88910.250    | 0.006                      | 141.8900  |
| 41   | 12     | 29     | 41    | 11      | 30      | A    | 0           | 88933.855    | 0.013                      | 271.9012  |
| 41   | 15     | 27     | 40    | 16      | 25      | E    | 0           | 88940.769    | 0.000                      | 285.5915  |
| 41   | 15     | 26     | 40    | 16      | 24      | E    | 0           | 88941.450    | 0.045                      | 285.6043  |
| 15   | 3      | 13     | 14    | 3       | 12      | A    | 1           | 89048.170    | 0.000                      | 219.0563  |
| 29   | 9      | 20     | 28    | 10      | 19      | A    | 0           | 89048.810    | -0.042                     | 170.5353  |
| 38   | 9      | 29     | 38    | 8       | 30      | A    | 0           | 89072.453    | -0.015                     | 237.6934  |
| 14   | 5      | 9      | 13    | 5       | 8       | E    | 0           | 89081.601    | 0.017                      | 90.9113   |
| 14   | 5      | 9      | 13    | 5       | 8       | A    | 0           | 89083.421    | 0.007                      | 90.9009   |
| 38   | 9      | 29     | 38    | 8       | 30      | E    | 0           | 89100.202    | 0.019                      | 237.7004  |
| 28   | 9      | 20     | 28    | 8       | 21      | E    | 0           | 89106.332    | -0.024                     | 164.2221  |
| 15   | 3      | 13     | 14    | 3       | 12      | E    | 1           | 89117.520    | -0.026                     | 218.6991  |
| 15   | 3      | 13     | 14    | 3       | 12      | E    | 0           | 89118.865    | -0.002                     | 90.3644   |
| 15   | 3      | 13     | 14    | 3       | 12      | A    | 0           | 89120.590    | -0.003                     | 90.3533   |
| 28   | 9      | 20     | 28    | 8       | 21      | A    | 0           | 89144.558    | 0.017                      | 164.2143  |
| 46   | 13     | 33     | 46    | 12      | 34      | E    | 0           | 89170.649    | -0.023                     | 323.2101  |
| 27   | 9      | 19     | 27    | 8       | 20      | E    | 0           | 89187.233    | -0.018                     | 158.3012  |
| 46   | 13     | 33     | 46    | 12      | 34      | A    | 0           | 89231.605    | 0.010                      | 323.2033  |
| 27   | 9      | 19     | 27    | 8       | 20      | A    | 0           | 89233.219    | 0.009                      | 158.2935  |
| 35   | 8      | 27     | 35    | 7       | 28      | A    | 0           | 89311.423    | -0.009                     | 211.0280  |
| 35   | 8      | 27     | 35    | 7       | 28      | E    | 0           | 89333.360    | 0.026                      | 211.0356  |
| 16   | 1      | 15     | 15    | 2       | 14      | A    | 1           | 89422.787    | 0.022                      | 220.0089  |
| 52   | 14     | 38     | 52    | 13      | 39      | E    | 0           | 89423.797    | -0.003                     | 391.8026  |
| 52   | 14     | 38     | 52    | 13      | 39      | A    | 0           | 89451.762    | -0.027                     | 391.7966  |
| 29   | 9      | 21     | 29    | 8       | 22      | E    | 0           | 89456.963    | -0.021                     | 170.3492  |
| 16   | 1      | 15     | 15    | 2       | 14      | E    | 1           | 89463.955    | -0.029                     | 219.6443  |
| 16   | 2      | 15     | 15    | 2       | 14      | A    | 1           | 89464.876    | -0.014                     | 220.0089  |
| 16   | 1      | 15     | 15    | 2       | 14      | E    | 0           | 89477.482    | 0.009                      | 91.3105   |
| 16   | 1      | 15     | 15    | 2       | 14      | A    | 0           | 89478.685    | -0.003                     | 91.2991   |
| 29   | 9      | 21     | 29    | 8       | 22      | A    | 0           | 89489.709    | 0.014                      | 170.3414  |
| 16   | 1      | 15     | 15    | 1       | 14      | A    | 1           | 89504.205    | 0.004                      | 220.0062  |
| 16   | 2      | 15     | 15    | 2       | 14      | E    | 1           | 89508.962    | -0.027                     | 219.6443  |
| 16   | 2      | 15     | 15    | 2       | 14      | E    | 0           | 89521.666    | -0.001                     | 91.3105   |
| 16   | 2      | 15     | 15    | 2       | 14      | A    | 0           | 89522.990    | -0.013                     | 91.2991   |
| 16   | 2      | 15     | 15    | 1       | 14      | A    | 1           | 89546.339    | 0.012                      | 220.0062  |
| 16   | 1      | 15     | 15    | 1       | 14      | E    | 1           | 89550.438    | -0.020                     | 219.6414  |
| 16   | 1      | 15     | 15    | 1       | 14      | E    | 0           | 89562.616    | -0.012                     | 91.3076   |
| 16   | 1      | 15     | 15    | 1       | 14      | A    | 0           | 89564.054    | -0.003                     | 91.2963   |
| 26   | 9      | 18     | 26    | 8       | 19      | E    | 0           | 89590.784    | -0.025                     | 152.5911  |



| $J'$ | $K'_a$ | $K'_c$ | $J''$ | $K''_a$ | $K''_c$ | Sym. | $v_{tCH_3}$ | $\nu_{Obs.}$ | $\nu_{Obs.} - \nu_{Calc.}$ | $E_{low}$ |
|------|--------|--------|-------|---------|---------|------|-------------|--------------|----------------------------|-----------|
| 16   | 2      | 15     | 15    | 1       | 14      | E    | 1           | 89595.468    | 0.005                      | 219.6414  |
| 16   | 2      | 15     | 15    | 1       | 14      | E    | 0           | 89606.823    | 0.001                      | 91.3076   |
| 16   | 2      | 15     | 15    | 1       | 14      | A    | 0           | 89608.370    | -0.003                     | 91.2963   |
| 26   | 9      | 18     | 26    | 8       | 19      | A    | 0           | 89649.501    | -0.001                     | 152.5834  |
| 17   | 0      | 17     | 16    | 1       | 16      | A    | 1           | 89663.850    | 0.022                      | 220.5438  |
| 17   | 1      | 17     | 16    | 1       | 16      | A    | 1           | 89664.277    | 0.035                      | 220.5438  |
| 17   | 0      | 17     | 16    | 0       | 16      | A    | 1           | 89664.702    | -0.001                     | 220.5438  |
| 17   | 1      | 17     | 16    | 0       | 16      | A    | 1           | 89665.167    | 0.051                      | 220.5438  |
| 17   | 0      | 17     | 16    | 1       | 16      | E    | 1           | 89677.485    | -0.033                     | 220.1668  |
| 17   | 1      | 17     | 16    | 1       | 16      | E    | 1           | 89677.965    | -0.003                     | 220.1668  |
| 17   | 0      | 17     | 16    | 0       | 16      | E    | 1           | 89678.423    | -0.041                     | 220.1667  |
| 17   | 1      | 17     | 16    | 0       | 16      | E    | 1           | 89678.896    | -0.016                     | 220.1667  |
| 17   | 0      | 17     | 16    | 1       | 16      | E    | 0           | 89697.456    | -0.038                     | 91.8356   |
| 17   | 0      | 17     | 16    | 1       | 16      | A    | 0           | 89697.918    | 0.002                      | 91.8239   |
| 17   | 1      | 17     | 16    | 1       | 16      | E    | 0           | 89697.918    | -0.015                     | 91.8356   |
| 17   | 1      | 17     | 16    | 1       | 16      | A    | 0           | 89698.377    | 0.021                      | 91.8239   |
| 17   | 0      | 17     | 16    | 0       | 16      | E    | 0           | 89698.377    | -0.041                     | 91.8356   |
| 17   | 0      | 17     | 16    | 0       | 16      | A    | 0           | 89698.838    | -0.004                     | 91.8239   |
| 17   | 1      | 17     | 16    | 0       | 16      | E    | 0           | 89698.838    | -0.018                     | 91.8356   |
| 17   | 1      | 17     | 16    | 0       | 16      | A    | 0           | 89699.296    | 0.014                      | 91.8239   |
| 43   | 16     | 27     | 42    | 17      | 26      | A    | 0           | 89756.848    | 0.275                      | 308.9945  |
| 15   | 2      | 13     | 14    | 2       | 12      | A    | 1           | 89992.286    | 0.051                      | 218.9780  |
| 21   | 2      | 19     | 21    | 1       | 20      | A    | 1           | 90072.057    | 0.005                      | 240.4807  |
| 15   | 2      | 13     | 14    | 2       | 12      | E    | 1           | 90088.935    | 0.010                      | 218.6177  |
| 15   | 2      | 13     | 14    | 2       | 12      | E    | 0           | 90089.537    | -0.012                     | 90.2835   |
| 15   | 2      | 13     | 14    | 2       | 12      | A    | 0           | 90092.774    | 0.004                      | 90.2723   |
| 21   | 3      | 19     | 21    | 2       | 20      | A    | 1           | 90109.336    | -0.006                     | 240.4808  |
| 25   | 9      | 17     | 25    | 8       | 18      | E    | 0           | 90206.510    | -0.019                     | 147.0957  |
| 25   | 9      | 17     | 25    | 8       | 18      | A    | 0           | 90286.859    | 0.016                      | 147.0881  |
| 30   | 9      | 22     | 30    | 8       | 23      | E    | 0           | 90334.319    | -0.009                     | 176.6771  |
| 30   | 9      | 22     | 30    | 8       | 23      | A    | 0           | 90362.551    | 0.011                      | 176.6694  |
| 23   | 9      | 15     | 23    | 8       | 15      | E    | 0           | 90384.245    | -0.032                     | 136.8034  |
| 30   | 9      | 22     | 29    | 10      | 19      | E    | 0           | 90400.102    | 0.005                      | 176.6749  |
| 21   | 2      | 19     | 21    | 1       | 20      | E    | 0           | 90469.534    | 0.031                      | 111.7943  |
| 21   | 2      | 19     | 21    | 1       | 20      | A    | 0           | 90483.544    | 0.057                      | 111.7832  |
| 27   | 5      | 22     | 27    | 4       | 23      | E    | 1           | 90484.165    | -0.167                     | 277.9422  |
| 21   | 3      | 19     | 21    | 2       | 20      | E    | 0           | 90509.013    | 0.028                      | 111.7943  |
| 21   | 3      | 19     | 21    | 2       | 20      | A    | 0           | 90523.148    | 0.050                      | 111.7833  |
| 21   | 2      | 19     | 21    | 1       | 20      | E    | 1           | 90529.237    | 0.003                      | 240.1249  |
| 30   | 8      | 23     | 30    | 7       | 24      | E    | 0           | 90567.518    | 0.012                      | 173.6561  |
| 21   | 3      | 19     | 21    | 2       | 20      | E    | 1           | 90569.797    | -0.009                     | 240.1249  |
| 30   | 8      | 23     | 30    | 7       | 24      | A    | 0           | 90581.350    | 0.019                      | 173.6479  |
| 27   | 5      | 22     | 27    | 4       | 23      | E    | 0           | 90588.303    | 0.036                      | 149.6117  |
| 27   | 5      | 22     | 27    | 4       | 23      | A    | 0           | 90590.419    | 0.030                      | 149.6025  |
| 58   | 24     | 34     | 57    | 25      | 32      | E    | 0           | 90600.304    | 0.028                      | 527.3889  |
| 23   | 9      | 14     | 23    | 8       | 15      | A    | 0           | 90679.291    | 0.022                      | 136.7951  |
| 45   | 17     | 29     | 44    | 18      | 27      | E    | 0           | 90698.694    | -0.019                     | 333.5822  |
| 45   | 17     | 28     | 44    | 18      | 26      | E    | 0           | 90711.314    | 0.033                      | 333.5940  |
| 53   | 14     | 39     | 53    | 13      | 40      | E    | 0           | 90735.135    | -0.013                     | 403.4932  |
| 23   | 9      | 14     | 23    | 8       | 15      | E    | 0           | 90743.094    | -0.006                     | 136.8034  |
| 22   | 6      | 16     | 21    | 7       | 15      | E    | 0           | 90792.023    | 0.070                      | 124.6066  |
| 51   | 14     | 37     | 51    | 13      | 38      | E    | 0           | 90830.544    | -0.019                     | 380.2883  |
| 51   | 14     | 37     | 51    | 13      | 38      | A    | 0           | 90877.940    | -0.013                     | 380.2821  |
| 24   | 9      | 16     | 24    | 8       | 17      | E    | 0           | 90937.722    | -0.053                     | 141.8177  |
| 16   | 3      | 13     | 15    | 4       | 12      | A    | 0           | 90938.435    | -0.010                     | 95.1317   |
| 14   | 3      | 11     | 13    | 3       | 10      | A    | 1           | 90943.347    | 0.012                      | 217.2294  |
| 16   | 3      | 13     | 15    | 4       | 12      | E    | 0           | 90949.616    | 0.018                      | 95.1424   |
| 14   | 3      | 11     | 13    | 3       | 10      | E    | 1           | 90986.893    | -0.026                     | 216.8679  |
| 14   | 3      | 11     | 13    | 3       | 10      | E    | 0           | 91032.953    | -0.006                     | 88.5330   |
| 14   | 3      | 11     | 13    | 3       | 10      | A    | 0           | 91035.175    | 0.012                      | 88.5216   |
| 24   | 9      | 16     | 24    | 8       | 17      | A    | 0           | 91048.821    | 0.019                      | 141.8103  |
| 23   | 3      | 20     | 23    | 2       | 21      | A    | 1           | 91263.947    | 0.108                      | 252.0100  |
| 30   | 10     | 20     | 30    | 9       | 21      | E    | 0           | 91278.218    | -0.030                     | 179.9826  |
| 30   | 10     | 20     | 30    | 9       | 21      | A    | 0           | 91311.363    | 0.012                      | 179.9750  |
| 15   | 3      | 13     | 14    | 2       | 12      | A    | 1           | 91393.957    | 0.019                      | 218.9780  |
| 3    | 1      | 2      | 3     | 0       | 3       | A    | 1           | 9141.224     | -0.019                     | 197.1841  |
| 15   | 3      | 13     | 14    | 2       | 12      | E    | 0           | 91544.030    | -0.008                     | 90.2835   |
| 15   | 3      | 13     | 14    | 2       | 12      | A    | 0           | 91550.286    | 0.002                      | 90.2723   |
| 15   | 3      | 13     | 14    | 2       | 12      | E    | 1           | 91557.283    | 0.018                      | 218.6177  |
| 23   | 3      | 20     | 23    | 2       | 21      | E    | 0           | 91622.478    | 0.025                      | 123.3428  |
| 23   | 3      | 20     | 23    | 2       | 21      | A    | 0           | 91634.196    | 0.043                      | 123.3324  |
| 23   | 3      | 20     | 23    | 2       | 21      | E    | 1           | 91647.417    | -0.045                     | 251.6744  |
| 31   | 9      | 23     | 31    | 8       | 24      | E    | 0           | 91809.335    | -0.006                     | 183.2005  |
| 25   | 4      | 21     | 25    | 3       | 22      | E    | 1           | 91814.289    | -0.083                     | 264.2864  |
| 23   | 4      | 20     | 23    | 3       | 21      | E    | 0           | 91817.724    | 0.034                      | 123.3432  |
| 23   | 4      | 20     | 23    | 3       | 21      | A    | 0           | 91830.054    | 0.043                      | 123.3328  |
| 31   | 9      | 23     | 31    | 8       | 24      | A    | 0           | 91833.476    | 0.006                      | 183.1928  |
| 25   | 4      | 21     | 25    | 3       | 22      | E    | 0           | 91839.675    | 0.034                      | 135.9548  |
| 14   | 4      | 10     | 13    | 4       | 9       | A    | 1           | 91853.953    | 0.028                      | 218.1721  |
| 23   | 9      | 15     | 23    | 8       | 16      | A    | 0           | 91856.379    | 0.018                      | 136.7519  |
| 14   | 4      | 10     | 13    | 4       | 9       | A    | 0           | 91879.330    | 0.006                      | 89.4728   |
| 14   | 4      | 10     | 13    | 4       | 9       | E    | 0           | 91880.699    | 0.025                      | 89.4838   |
| 3    | 1      | 2      | 3     | 0       | 3       | E    | 0           | 9194.982     | -0.000                     | 68.4646   |
| 3    | 1      | 2      | 3     | 0       | 3       | A    | 0           | 9197.058     | -0.010                     | 68.4526   |
| 22   | 9      | 13     | 22    | 8       | 14      | A    | 0           | 92033.904    | 0.005                      | 131.9361  |
| 22   | 9      | 13     | 22    | 8       | 14      | E    | 0           | 92108.859    | -0.021                     | 131.9448  |
| 25   | 5      | 21     | 25    | 4       | 22      | A    | 1           | 92261.177    | 0.180                      | 264.6040  |
| 15   | 12     | 3      | 14    | 12      | 2       | A    | 0           | 92429.247    | -0.058                     | 116.2589  |
| 15   | 12     | 4      | 14    | 12      | 3       | A    | 0           | 92429.247    | -0.058                     | 116.2589  |
| 22   | 9      | 14     | 22    | 8       | 15      | E    | 0           | 92502.421    | -0.052                     | 131.9201  |
| 15   | 11     | 5      | 14    | 11      | 4       | A    | 0           | 92525.118    | -0.011                     | 111.8793  |
| 15   | 11     | 4      | 14    | 11      | 3       | A    | 0           | 92525.118    | -0.011                     | 111.8793  |
| 15   | 11     | 4      | 14    | 11      | 3       | E    | 0           | 92525.118    | -0.190                     | 111.8894  |
| 15   | 11     | 5      | 14    | 11      | 4       | E    | 0           | 92525.642    | 0.044                      | 111.8763  |
| 49   | 19     | 31     | 48    | 20      | 28      | A    | 0           | 92569.404    | 0.082                      | 386.4002  |
| 25   | 5      | 21     | 25    | 4       | 22      | E    | 1           | 92592.727    | -0.093                     | 264.2885  |
| 25   | 5      | 21     | 25    | 4       | 22      | E    | 0           | 92597.385    | 0.012                      | 135.9568  |
| 49   | 19     | 31     | 48    | 20      | 29      | E    | 0           | 92598.800    | 0.005                      | 386.3883  |
| 25   | 5      | 21     | 25    | 4       | 22      | A    | 0           | 92607.841    | 0.029                      | 135.9470  |
| 22   | 9      | 14     | 22    | 8       | 15      | A    | 0           | 92651.079    | -0.028                     | 131.9137  |
| 15   | 10     | 5      | 14    | 10      | 4       | A    | 0           | 92651.545    | 0.034                      | 107.8846  |
| 15   | 10     | 6      | 14    | 10      | 5       | A    | 0           | 92651.545    | 0.035                      | 107.8846  |
| 15   | 10     | 5      | 14    | 10      | 4       | E    | 0           | 92651.545    | -0.129                     | 107.8958  |
| 15   | 10     | 6      | 14    | 10      | 5       | E    | 0           | 92652.096    | -0.030                     | 107.8832  |
| 15   | 4      | 12     | 14    | 4       | 11      | E    | 0           | 92661.319    | -0.016                     | 92.0516   |
| 15   | 4      | 12     | 14    | 4       | 11      | A    | 0           | 92662.169    | -0.027                     | 92.0409   |
| 27   | 8      | 19     | 26    | 9       | 18      | A    | 0           | 92698.947    | -0.042                     | 155.5738  |
| 27   | 8      | 19     | 26    | 9       | 18      | E    | 0           | 92782.859    | 0.027                      | 155.5796  |
| 15   | 9      | 6      | 14    | 9       | 5       | A    | 0           | 92823.685    | -0.007                     | 104.2765  |
| 15   | 9      | 6      | 14    | 9       | 5       | E    | 0           | 92823.685    | -0.116                     | 104.2885  |
| 15   | 9      | 7      | 14    | 9       | 6       | E    | 0           | 92824.478    | -0.020                     | 104.2767  |
| 22   | 9      | 13     | 22    | 8       | 15      | E    | 0           | 92848.168    | -0.208                     | 131.9201  |
| 27   | 6      | 22     | 27    | 5       | 23      | E    | 1           | 92958.054    | -0.097                     | 277.9514  |
| 8    | 3      | 6      | 7     | 4       | 3       | E    | 0           | 9300.088     | 0.057                      | 76.0805   |
| 27   | 6      | 22     | 27    | 5       | 23      | E    | 0           | 93000.491    | 0.007                      | 149.6207  |
| 27   | 6      | 22     | 27    | 5       | 23      | A    | 0           | 93009.539    | 0.014                      | 149.6115  |



| $J'$ | $K'_a$ | $K'_c$ | $J''$ | $K''_a$ | $K''_c$ | Sym. | $v_{tCH_3}$ | $\nu_{Obs.}$ | $\nu_{Obs.} - \nu_{Calc.}$ | $E_{low}$ |
|------|--------|--------|-------|---------|---------|------|-------------|--------------|----------------------------|-----------|
| 15   | 8      | 8      | 14    | 8       | 7       | A    | 0           | 93067.782    | -0.002                     | 101.0577  |
| 15   | 8      | 7      | 14    | 8       | 6       | E    | 0           | 93068.297    | -0.035                     | 101.0704  |
| 15   | 8      | 7      | 14    | 8       | 6       | A    | 0           | 93068.752    | -0.038                     | 101.0577  |
| 15   | 8      | 8      | 14    | 8       | 7       | E    | 0           | 93069.422    | 0.004                      | 101.0595  |
| 21   | 9      | 12     | 21    | 8       | 13      | A    | 0           | 93086.476    | 0.017                      | 127.3068  |
| 3    | 1      | 2      | 3     | 0       | 3       | E    | 1           | 9312.467     | -0.020                     | 196.8007  |
| 21   | 9      | 12     | 21    | 8       | 13      | E    | 0           | 93149.122    | -0.037                     | 127.3163  |
| 21   | 9      | 13     | 21    | 8       | 14      | E    | 0           | 93259.343    | -0.031                     | 127.3012  |
| 29   | 7      | 23     | 29    | 6       | 24      | E    | 1           | 93308.926    | -0.084                     | 292.6506  |
| 8    | 3      | 6      | 7     | 4       | 3       | A    | 0           | 9337.443     | -0.041                     | 76.0681   |
| 29   | 7      | 23     | 29    | 6       | 24      | E    | 0           | 93393.820    | -0.001                     | 164.3220  |
| 21   | 9      | 13     | 21    | 8       | 14      | A    | 0           | 93394.687    | 0.003                      | 127.2957  |
| 29   | 7      | 23     | 29    | 6       | 24      | A    | 0           | 93402.867    | -0.001                     | 164.3134  |
| 15   | 7      | 9      | 14    | 7       | 8       | A    | 0           | 93426.139    | -0.017                     | 98.2331   |
| 15   | 7      | 9      | 14    | 7       | 8       | E    | 0           | 93437.851    | -0.015                     | 98.2368   |
| 15   | 7      | 8      | 14    | 7       | 7       | A    | 0           | 93448.042    | -0.027                     | 98.2335   |
| 16   | 2      | 14     | 15    | 3       | 13      | A    | 1           | 93492.280    | -0.004                     | 222.0266  |
| 16   | 2      | 14     | 15    | 3       | 13      | E    | 1           | 93517.858    | -0.067                     | 221.6717  |
| 16   | 2      | 14     | 15    | 3       | 13      | A    | 0           | 93533.976    | -0.017                     | 93.3261   |
| 16   | 2      | 14     | 15    | 3       | 13      | E    | 0           | 93533.976    | -0.036                     | 93.3371   |
| 20   | 1      | 19     | 20    | 0       | 20      | E    | 0           | 93598.749    | 0.000                      | 104.8304  |
| 20   | 1      | 19     | 20    | 1       | 20      | E    | 0           | 93598.749    | 0.046                      | 104.8304  |
| 20   | 2      | 19     | 20    | 0       | 20      | E    | 0           | 93601.561    | -0.053                     | 104.8304  |
| 20   | 2      | 19     | 20    | 0       | 20      | E    | 0           | 93601.561    | -0.053                     | 104.8304  |
| 20   | 2      | 19     | 20    | 0       | 20      | E    | 0           | 93601.561    | -0.053                     | 104.8304  |
| 20   | 2      | 19     | 20    | 1       | 20      | E    | 0           | 93601.561    | -0.008                     | 104.8304  |
| 51   | 20     | 31     | 50    | 21      | 29      | E    | 0           | 93614.263    | 0.040                      | 414.6055  |
| 20   | 1      | 19     | 20    | 0       | 20      | A    | 0           | 93615.292    | 0.051                      | 104.8188  |
| 20   | 2      | 19     | 20    | 1       | 20      | A    | 0           | 93618.125    | 0.054                      | 104.8188  |
| 34   | 11     | 24     | 33    | 12      | 21      | A    | 0           | 93621.532    | -0.042                     | 211.0033  |
| 20   | 2      | 19     | 20    | 1       | 20      | E    | 1           | 93692.989    | -0.011                     | 233.1586  |
| 30   | 6      | 24     | 30    | 5       | 25      | E    | 1           | 93831.252    | -0.234                     | 298.6882  |
| 15   | 6      | 10     | 14    | 6       | 9       | A    | 0           | 93898.750    | -0.022                     | 95.8098   |
| 35   | 11     | 24     | 35    | 10      | 25      | E    | 0           | 93912.759    | -0.057                     | 218.5169  |
| 20   | 9      | 11     | 20    | 8       | 12      | A    | 0           | 93919.337    | 0.022                      | 122.9026  |
| 32   | 9      | 24     | 32    | 8       | 25      | E    | 0           | 93920.809    | -0.015                     | 189.9138  |
| 15   | 6      | 10     | 14    | 6       | 9       | E    | 0           | 93926.035    | -0.016                     | 95.8173   |
| 32   | 9      | 24     | 32    | 8       | 25      | A    | 0           | 93941.101    | -0.018                     | 189.9062  |
| 20   | 9      | 11     | 20    | 8       | 12      | E    | 0           | 93954.207    | -0.051                     | 122.9131  |
| 20   | 9      | 12     | 20    | 8       | 13      | E    | 0           | 93958.917    | -0.011                     | 122.9016  |
| 35   | 11     | 24     | 35    | 10      | 25      | A    | 0           | 93966.493    | -0.004                     | 218.5097  |
| 15   | 5      | 11     | 14    | 5       | 10      | A    | 1           | 94005.156    | 0.003                      | 222.4591  |
| 30   | 6      | 24     | 30    | 5       | 25      | A    | 0           | 94015.222    | -0.006                     | 170.3521  |
| 30   | 6      | 24     | 30    | 5       | 25      | E    | 0           | 94018.736    | 0.005                      | 170.3607  |
| 15   | 5      | 11     | 14    | 5       | 10      | A    | 0           | 94049.971    | -0.020                     | 93.7793   |
| 15   | 5      | 11     | 14    | 5       | 10      | E    | 0           | 94052.098    | -0.009                     | 93.7892   |
| 20   | 9      | 12     | 20    | 8       | 13      | A    | 0           | 94065.651    | -0.006                     | 122.8974  |
| 15   | 6      | 9      | 14    | 6       | 8       | E    | 0           | 94177.553    | -0.043                     | 95.8291   |
| 15   | 6      | 9      | 14    | 6       | 8       | A    | 0           | 94202.694    | -0.014                     | 95.8180   |
| 16   | 3      | 14     | 15    | 3       | 13      | A    | 1           | 94303.454    | 0.017                      | 222.0266  |
| 16   | 3      | 14     | 15    | 3       | 13      | E    | 1           | 94373.359    | -0.060                     | 221.6717  |
| 31   | 8      | 24     | 31    | 7       | 25      | E    | 0           | 94378.029    | -0.006                     | 180.0524  |
| 16   | 3      | 14     | 15    | 3       | 13      | E    | 0           | 94378.681    | -0.022                     | 93.3371   |
| 16   | 3      | 14     | 15    | 3       | 13      | A    | 0           | 94380.596    | -0.018                     | 93.3261   |
| 31   | 8      | 24     | 31    | 7       | 25      | A    | 0           | 94389.481    | 0.004                      | 180.0443  |
| 36   | 12     | 25     | 35    | 13      | 22      | A    | 0           | 94397.094    | -0.039                     | 229.9870  |
| 51   | 13     | 38     | 51    | 12      | 39      | A    | 0           | 94399.066    | -0.085                     | 377.1333  |
| 51   | 13     | 38     | 51    | 12      | 39      | E    | 0           | 94425.211    | -0.047                     | 377.1386  |
| 7    | 5      | 3      | 6     | 4       | 3       | E    | 0           | 94440.482    | -0.035                     | 74.6266   |
| 7    | 5      | 3      | 6     | 4       | 2       | A    | 0           | 94464.570    | -0.024                     | 74.6195   |
| 7    | 5      | 2      | 6     | 4       | 2       | E    | 0           | 94479.736    | -0.031                     | 74.6328   |
| 7    | 5      | 2      | 6     | 4       | 3       | A    | 0           | 94496.502    | 0.022                      | 74.6185   |
| 45   | 13     | 32     | 45    | 12      | 33      | E    | 0           | 94554.824    | -0.064                     | 313.0174  |
| 19   | 9      | 10     | 19    | 8       | 11      | A    | 0           | 94589.425    | 0.040                      | 118.7201  |
| 50   | 14     | 36     | 50    | 13      | 37      | E    | 0           | 94590.351    | -0.020                     | 368.9751  |
| 53   | 21     | 33     | 52    | 22      | 31      | E    | 0           | 94591.982    | 0.012                      | 444.0075  |
| 17   | 2      | 16     | 16    | 2       | 15      | A    | 1           | 94596.909    | 0.019                      | 222.9931  |
| 19   | 9      | 10     | 19    | 8       | 11      | E    | 0           | 94598.334    | -0.052                     | 118.7318  |
| 36   | 12     | 25     | 35    | 13      | 23      | E    | 0           | 94612.664    | -0.034                     | 229.9816  |
| 17   | 1      | 16     | 16    | 1       | 15      | A    | 1           | 94617.455    | -0.048                     | 222.9917  |
| 17   | 1      | 16     | 16    | 2       | 15      | E    | 1           | 94617.884    | -0.033                     | 222.6300  |
| 45   | 13     | 32     | 45    | 12      | 33      | A    | 0           | 94624.232    | -0.009                     | 313.0108  |
| 17   | 1      | 16     | 16    | 2       | 15      | E    | 0           | 94632.453    | -0.028                     | 94.2966   |
| 17   | 1      | 16     | 16    | 2       | 15      | A    | 0           | 94633.727    | -0.033                     | 94.2853   |
| 17   | 2      | 16     | 16    | 1       | 15      | A    | 1           | 94639.021    | 0.005                      | 222.9917  |
| 17   | 2      | 16     | 16    | 2       | 15      | E    | 1           | 94641.003    | -0.038                     | 222.6300  |
| 50   | 14     | 36     | 50    | 13      | 37      | A    | 0           | 94653.380    | -0.005                     | 368.9690  |
| 17   | 2      | 16     | 16    | 2       | 15      | A    | 0           | 94656.437    | -0.033                     | 94.2853   |
| 17   | 1      | 16     | 16    | 1       | 15      | E    | 1           | 94662.908    | -0.014                     | 222.6285  |
| 17   | 1      | 16     | 16    | 1       | 15      | E    | 0           | 94676.658    | -0.018                     | 94.2951   |
| 17   | 1      | 16     | 16    | 1       | 15      | A    | 0           | 94678.046    | -0.028                     | 94.2838   |
| 17   | 2      | 16     | 16    | 1       | 15      | E    | 1           | 94685.991    | -0.055                     | 222.6285  |
| 17   | 2      | 16     | 16    | 1       | 15      | E    | 0           | 94699.287    | -0.034                     | 94.2951   |
| 17   | 2      | 16     | 16    | 1       | 15      | A    | 0           | 94700.760    | -0.024                     | 94.2838   |
| 40   | 12     | 28     | 40    | 11      | 29      | E    | 0           | 94742.991    | -0.048                     | 262.8603  |
| 18   | 0      | 18     | 17    | 1       | 17      | A    | 1           | 94793.298    | 0.052                      | 223.5347  |
| 18   | 1      | 18     | 17    | 0       | 17      | A    | 1           | 94793.850    | -0.005                     | 223.5347  |
| 29   | 10     | 19     | 29    | 9       | 20      | A    | 0           | 94806.026    | -0.003                     | 173.5056  |
| 18   | 0      | 18     | 17    | 1       | 17      | E    | 1           | 94806.823    | -0.018                     | 223.1581  |
| 18   | 1      | 18     | 17    | 0       | 17      | E    | 1           | 94807.465    | -0.038                     | 223.1581  |
| 40   | 12     | 28     | 40    | 11      | 29      | A    | 0           | 94808.817    | 0.001                      | 262.8535  |
| 54   | 14     | 40     | 54    | 13      | 41      | A    | 0           | 94826.818    | -0.081                     | 415.3326  |
| 18   | 0      | 18     | 17    | 1       | 17      | E    | 0           | 94828.137    | -0.037                     | 94.8276   |
| 18   | 1      | 18     | 17    | 1       | 17      | E    | 0           | 94828.137    | -0.244                     | 94.8276   |
| 18   | 0      | 18     | 17    | 1       | 17      | A    | 0           | 94828.674    | 0.081                      | 94.8159   |
| 18   | 1      | 18     | 17    | 1       | 17      | A    | 0           | 94828.674    | -0.127                     | 94.8159   |
| 18   | 0      | 18     | 17    | 0       | 17      | E    | 0           | 94828.674    | 0.061                      | 94.8276   |
| 18   | 1      | 18     | 17    | 0       | 17      | E    | 0           | 94828.674    | -0.146                     | 94.8276   |
| 18   | 0      | 18     | 17    | 0       | 17      | A    | 0           | 94829.225    | 0.192                      | 94.8159   |
| 18   | 1      | 18     | 17    | 0       | 17      | A    | 0           | 94829.225    | -0.015                     | 94.8159   |
| 54   | 14     | 40     | 54    | 13      | 41      | E    | 0           | 94840.289    | -0.032                     | 415.3378  |
| 20   | 5      | 15     | 19    | 6       | 14      | A    | 0           | 94845.299    | 0.010                      | 113.6253  |
| 20   | 5      | 15     | 19    | 6       | 14      | E    | 0           | 94883.597    | 0.027                      | 113.6347  |
| 16   | 2      | 14     | 15    | 2       | 13      | A    | 1           | 94894.018    | 0.031                      | 221.9799  |
| 16   | 2      | 14     | 15    | 2       | 13      | E    | 1           | 94986.247    | -0.018                     | 221.6227  |
| 16   | 2      | 14     | 15    | 2       | 13      | E    | 0           | 94988.475    | -0.026                     | 93.2886   |
| 16   | 2      | 14     | 15    | 2       | 13      | A    | 0           | 94991.494    | -0.012                     | 93.2774   |
| 22   | 2      | 20     | 22    | 1       | 21      | A    | 1           | 95063.075    | -0.006                     | 244.4913  |
| 48   | 12     | 36     | 48    | 11      | 37      | A    | 0           | 95068.901    | -0.091                     | 341.0799  |
| 38   | 13     | 26     | 37    | 14      | 23      | A    | 0           | 95069.566    | -0.057                     | 250.1776  |
| 22   | 3      | 20     | 22    | 2       | 21      | A    | 1           | 95082.546    | -0.018                     | 244.4914  |
| 18   | 9      | 10     | 18    | 8       | 11      | E    | 0           | 95099.495    | -0.021                     | 114.7582  |
| 48   | 12     | 36     | 48    | 11      | 37      | E    | 0           | 95102.485    | -0.032                     | 341.0854  |
| 18   | 9      | 9      | 18    | 8       | 10      | E    | 0           | 95128.047    | -0.049                     | 114.7689  |
| 56   | 15     | 41     | 56    | 14      | 42      | E    | 0           | 95133.676    | -0.033                     | 443.1077  |
| 18   | 9      | 9      | 18    | 8       | 10      | A    | 0           | 95135.169    | 0.050                      | 114.7567  |



| $J'$ | $K'_a$ | $K'_c$ | $J''$ | $K''_a$ | $K''_c$ | Sym. | $v_{tCH_3}$ | $\nu_{Obs.}$ | $\nu_{Obs.} - \nu_{Calc.}$ | $E_{low}$ |
|------|--------|--------|-------|---------|---------|------|-------------|--------------|----------------------------|-----------|
| 56   | 15     | 41     | 56    | 14      | 42      | A    | 0           | 95159.543    | -0.044                     | 443.1023  |
| 18   | 9      | 10     | 18    | 8       | 11      | A    | 0           | 95163.057    | -0.033                     | 114.7557  |
| 38   | 13     | 25     | 37    | 14      | 24      | A    | 0           | 95342.103    | -0.023                     | 250.1772  |
| 34   | 11     | 23     | 33    | 12      | 22      | A    | 0           | 95423.699    | -0.037                     | 211.0001  |
| 18   | 4      | 14     | 17    | 5       | 13      | A    | 0           | 95436.432    | -0.018                     | 103.8120  |
| 18   | 4      | 14     | 17    | 5       | 13      | E    | 0           | 95460.331    | 0.016                      | 103.8221  |
| 22   | 2      | 20     | 22    | 1       | 21      | E    | 0           | 95485.535    | 0.001                      | 115.8071  |
| 22   | 2      | 20     | 22    | 1       | 21      | A    | 0           | 95500.520    | 0.044                      | 115.7961  |
| 22   | 3      | 20     | 22    | 2       | 21      | E    | 0           | 95506.249    | 0.015                      | 115.8071  |
| 22   | 3      | 20     | 22    | 2       | 21      | A    | 0           | 95521.289    | 0.042                      | 115.7961  |
| 17   | 9      | 9      | 17    | 8       | 10      | E    | 0           | 95538.616    | -0.025                     | 111.0121  |
| 22   | 2      | 20     | 22    | 1       | 21      | E    | 1           | 95551.316    | -0.030                     | 244.1370  |
| 17   | 9      | 8      | 17    | 8       | 9       | E    | 0           | 95567.571    | -0.050                     | 111.0228  |
| 17   | 9      | 8      | 17    | 8       | 9       | A    | 0           | 95582.707    | 0.065                      | 111.0103  |
| 17   | 9      | 9      | 17    | 8       | 10      | A    | 0           | 95593.751    | -0.036                     | 111.0099  |
| 55   | 22     | 34     | 54    | 23      | 31      | A    | 0           | 95601.392    | -0.030                     | 474.6341  |
| 34   | 11     | 23     | 33    | 12      | 22      | E    | 0           | 95641.186    | -0.107                     | 210.9982  |
| 55   | 22     | 33     | 54    | 23      | 31      | E    | 0           | 95650.925    | 0.143                      | 474.6282  |
| 16   | 3      | 14     | 15    | 2       | 13      | A    | 1           | 95705.147    | 0.007                      | 221.9799  |
| 40   | 14     | 27     | 39    | 15      | 24      | A    | 0           | 95754.241    | -0.048                     | 271.5742  |
| 16   | 3      | 14     | 15    | 2       | 13      | E    | 0           | 95833.170    | -0.022                     | 93.2886   |
| 16   | 3      | 14     | 15    | 2       | 13      | A    | 0           | 95838.111    | -0.016                     | 93.2774   |
| 16   | 3      | 14     | 15    | 2       | 13      | E    | 1           | 95841.738    | -0.020                     | 221.6227  |
| 40   | 14     | 27     | 39    | 15      | 25      | E    | 0           | 95852.635    | -0.023                     | 271.5668  |
| 40   | 14     | 26     | 39    | 15      | 25      | A    | 0           | 95854.719    | -0.035                     | 271.5740  |
| 40   | 14     | 26     | 39    | 15      | 24      | E    | 0           | 95857.001    | 0.058                      | 271.5797  |
| 32   | 8      | 25     | 31    | 9       | 22      | E    | 0           | 95865.319    | -0.041                     | 186.7160  |
| 16   | 9      | 8      | 16    | 8       | 9       | E    | 0           | 95903.113    | -0.015                     | 107.4811  |
| 16   | 9      | 7      | 16    | 8       | 8       | E    | 0           | 95931.638    | -0.053                     | 107.4919  |
| 16   | 9      | 7      | 16    | 8       | 8       | A    | 0           | 95950.402    | 0.151                      | 107.4793  |
| 16   | 9      | 8      | 16    | 8       | 9       | A    | 0           | 95954.323    | -0.062                     | 107.4791  |
| 33   | 7      | 26     | 33    | 6       | 27      | E    | 1           | 96142.948    | -0.289                     | 321.6522  |
| 15   | 9      | 7      | 15    | 8       | 8       | E    | 0           | 96203.224    | -0.056                     | 104.1640  |
| 15   | 9      | 6      | 15    | 8       | 7       | E    | 0           | 96231.331    | -0.050                     | 104.1748  |
| 45   | 11     | 34     | 45    | 10      | 35      | A    | 0           | 96261.867    | -0.079                     | 307.1790  |
| 55   | 15     | 40     | 55    | 14      | 41      | E    | 0           | 96266.225    | -0.027                     | 430.7060  |
| 9    | 3      | 6      | 8     | 2       | 7       | E    | 0           | 96280.612    | -0.021                     | 75.2529   |
| 9    | 3      | 6      | 8     | 2       | 7       | A    | 0           | 96286.602    | 0.016                      | 75.2413   |
| 45   | 11     | 34     | 45    | 10      | 35      | E    | 0           | 96297.410    | -0.021                     | 307.1847  |
| 15   | 5      | 10     | 14    | 5       | 9       | A    | 0           | 96299.462    | -0.015                     | 93.8724   |
| 15   | 5      | 10     | 14    | 5       | 9       | E    | 0           | 96300.400    | -0.011                     | 93.8827   |
| 55   | 15     | 40     | 55    | 14      | 41      | A    | 0           | 96313.101    | -0.031                     | 430.7003  |
| 10   | 4      | 7      | 9     | 3       | 6       | E    | 0           | 96315.662    | -0.034                     | 78.4645   |
| 10   | 4      | 7      | 9     | 3       | 6       | A    | 0           | 96339.399    | -0.014                     | 78.4531   |
| 15   | 3      | 12     | 14    | 3       | 11      | A    | 1           | 96376.302    | 0.001                      | 220.2629  |
| 24   | 3      | 21     | 24    | 2       | 22      | A    | 1           | 96385.932    | 0.090                      | 256.5284  |
| 33   | 7      | 26     | 33    | 6       | 27      | A    | 0           | 96423.231    | -0.017                     | 193.3213  |
| 33   | 7      | 26     | 33    | 6       | 27      | E    | 0           | 96433.824    | 0.013                      | 193.3292  |
| 14   | 9      | 6      | 14    | 8       | 7       | E    | 0           | 96448.194    | -0.006                     | 101.0595  |
| 15   | 3      | 12     | 14    | 3       | 11      | E    | 0           | 96482.108    | -0.028                     | 219.9029  |
| 31   | 8      | 24     | 30    | 9       | 21      | E    | 0           | 96469.175    | -0.033                     | 179.9826  |
| 14   | 9      | 5      | 14    | 8       | 6       | E    | 0           | 96475.854    | -0.058                     | 101.0704  |
| 24   | 4      | 21     | 24    | 3       | 22      | A    | 1           | 96485.395    | 0.085                      | 256.5286  |
| 15   | 3      | 12     | 14    | 3       | 11      | E    | 0           | 96486.507    | -0.019                     | 91.5695   |
| 15   | 3      | 12     | 14    | 3       | 11      | A    | 0           | 96489.810    | -0.021                     | 91.5582   |
| 28   | 5      | 23     | 28    | 4       | 24      | E    | 1           | 96506.306    | -0.152                     | 283.4896  |
| 42   | 15     | 27     | 41    | 16      | 26      | A    | 0           | 96525.480    | 0.016                      | 294.1758  |
| 42   | 15     | 28     | 41    | 16      | 26      | E    | 0           | 96556.621    | 0.001                      | 294.1673  |
| 42   | 15     | 27     | 41    | 16      | 25      | E    | 0           | 96557.292    | 0.028                      | 294.1801  |
| 28   | 5      | 23     | 28    | 4       | 24      | E    | 0           | 96587.364    | 0.018                      | 155.1596  |
| 28   | 5      | 23     | 28    | 4       | 24      | A    | 0           | 96592.010    | -0.003                     | 155.1505  |
| 57   | 23     | 35     | 56    | 24      | 32      | A    | 0           | 96642.850    | -0.030                     | 506.4504  |
| 13   | 9      | 5      | 13    | 8       | 6       | E    | 0           | 96645.849    | -0.004                     | 98.1666   |
| 57   | 23     | 35     | 56    | 24      | 33      | E    | 0           | 96649.870    | 0.013                      | 506.4378  |
| 33   | 9      | 25     | 33    | 8       | 26      | E    | 0           | 96671.591    | -0.017                     | 196.8119  |
| 13   | 9      | 4      | 13    | 8       | 5       | E    | 0           | 96673.194    | -0.056                     | 98.1776   |
| 33   | 9      | 25     | 33    | 8       | 26      | A    | 0           | 96688.325    | -0.014                     | 196.8045  |
| 13   | 9      | 5      | 13    | 8       | 6       | A    | 0           | 96694.114    | -0.055                     | 98.1648   |
| 32   | 10     | 22     | 31    | 11      | 21      | A    | 0           | 96762.807    | -0.050                     | 193.2200  |
| 24   | 3      | 21     | 24    | 2       | 22      | E    | 0           | 96769.904    | 0.012                      | 127.8643  |
| 24   | 3      | 21     | 24    | 2       | 22      | A    | 0           | 96782.728    | 0.029                      | 127.8539  |
| 24   | 3      | 21     | 24    | 2       | 22      | E    | 1           | 96802.602    | -0.053                     | 256.1952  |
| 12   | 9      | 4      | 12    | 8       | 5       | E    | 0           | 96803.222    | -0.021                     | 95.4843   |
| 12   | 9      | 3      | 12    | 8       | 4       | E    | 0           | 96830.321    | -0.069                     | 95.4953   |
| 12   | 9      | 4      | 12    | 8       | 5       | A    | 0           | 96851.309    | -0.003                     | 95.4826   |
| 24   | 4      | 21     | 24    | 3       | 22      | E    | 0           | 96877.551    | 0.010                      | 127.8645  |
| 24   | 4      | 21     | 24    | 3       | 22      | A    | 0           | 96890.745    | 0.033                      | 127.8541  |
| 24   | 4      | 21     | 24    | 3       | 22      | E    | 1           | 96913.575    | -0.056                     | 256.1954  |
| 11   | 9      | 3      | 11    | 8       | 4       | E    | 0           | 96926.548    | -0.019                     | 93.0117   |
| 26   | 4      | 22     | 26    | 3       | 23      | A    | 1           | 96934.709    | 0.189                      | 269.6306  |
| 11   | 9      | 2      | 11    | 8       | 3       | E    | 0           | 96953.451    | -0.068                     | 93.0227   |
| 9    | 4      | 5      | 8     | 3       | 6       | E    | 0           | 96973.826    | -0.006                     | 76.3907   |
| 11   | 9      | 3      | 11    | 8       | 4       | A    | 0           | 96974.472    | 0.003                      | 93.0099   |
| 9    | 4      | 5      | 8     | 3       | 6       | A    | 0           | 96977.244    | 0.002                      | 76.3795   |
| 31   | 9      | 23     | 30    | 10      | 20      | A    | 0           | 96988.320    | -0.032                     | 183.0208  |
| 31   | 9      | 23     | 30    | 10      | 20      | E    | 0           | 97000.333    | 0.032                      | 183.0273  |
| 10   | 9      | 1      | 10    | 8       | 2       | E    | 0           | 97048.133    | -0.010                     | 90.7589   |
| 10   | 9      | 2      | 10    | 8       | 3       | A    | 0           | 97069.125    | 0.007                      | 90.7462   |
| 26   | 4      | 22     | 26    | 3       | 23      | E    | 1           | 97253.883    | -0.108                     | 269.3183  |
| 26   | 4      | 22     | 26    | 3       | 23      | E    | 0           | 97266.637    | 0.019                      | 140.9873  |
| 26   | 4      | 22     | 26    | 3       | 23      | A    | 0           | 97276.318    | 0.021                      | 140.9775  |
| 44   | 16     | 29     | 43    | 17      | 27      | E    | 0           | 97332.520    | -0.027                     | 317.9726  |
| 44   | 16     | 28     | 43    | 17      | 26      | E    | 0           | 97338.337    | 0.040                      | 317.9849  |
| 42   | 10     | 32     | 42    | 9       | 33      | A    | 0           | 97407.025    | -0.066                     | 275.4406  |
| 42   | 10     | 32     | 42    | 9       | 33      | E    | 0           | 97439.750    | -0.003                     | 275.4468  |
| 28   | 10     | 18     | 28    | 9       | 19      | A    | 0           | 97561.431    | 0.006                      | 167.2932  |
| 28   | 10     | 18     | 28    | 9       | 19      | E    | 0           | 97578.133    | -0.064                     | 167.3004  |
| 26   | 5      | 22     | 26    | 4       | 23      | E    | 0           | 97706.762    | 0.010                      | 140.9884  |
| 26   | 5      | 22     | 26    | 4       | 23      | E    | 1           | 97707.529    | -0.079                     | 269.3195  |
| 26   | 5      | 22     | 26    | 4       | 23      | A    | 0           | 97717.900    | 0.029                      | 140.9786  |
| 59   | 24     | 35     | 58    | 25      | 33      | E    | 0           | 97740.195    | 0.019                      | 539.4606  |
| 36   | 8      | 28     | 36    | 7       | 29      | A    | 0           | 97747.226    | -0.026                     | 218.4998  |
| 36   | 8      | 28     | 36    | 7       | 29      | E    | 0           | 97765.832    | 0.014                      | 218.5071  |
| 39   | 9      | 30     | 39    | 8       | 31      | A    | 0           | 98016.539    | -0.055                     | 245.8768  |
| 28   | 6      | 23     | 28    | 5       | 24      | E    | 1           | 98034.522    | -0.102                     | 283.4949  |
| 39   | 9      | 30     | 39    | 8       | 31      | E    | 0           | 98043.043    | -0.001                     | 245.8835  |
| 28   | 6      | 23     | 28    | 5       | 24      | E    | 0           | 98071.925    | 0.009                      | 155.1646  |
| 21   | 2      | 20     | 21    | 1       | 21      | A    | 1           | 98080.459    | -0.098                     | 237.2091  |
| 28   | 6      | 23     | 28    | 5       | 24      | A    | 0           | 98081.199    | 0.011                      | 155.1555  |
| 32   | 10     | 23     | 32    | 9       | 24      | E    | 0           | 98104.010    | -0.030                     | 193.0466  |
| 32   | 10     | 23     | 32    | 9       | 24      | A    | 0           | 98143.117    | -0.004                     | 193.0397  |
| 30   | 7      | 24     | 30    | 6       | 25      | E    | 1           | 98147.325    | -0.097                     | 298.7080  |
| 46   | 17     | 30     | 45    | 18      | 28      | E    | 0           | 98166.060    | -0.018                     | 342.9822  |
| 46   | 17     | 29     | 45    | 18      | 27      | E    | 0           | 98177.807    | 0.006                      | 342.9940  |
| 25   | 7      | 18     | 24    | 8       | 17      | A    | 0           | 98178.864    | -0.053                     | 141.8103  |
| 31   | 10     | 22     | 31    | 9       | 23      | E    | 0           | 98218.146    | -0.039                     | 186.2629  |



| $J'$ | $K'_a$ | $K'_c$ | $J''$ | $K''_a$ | $K''_c$ | Sym. | $v_{tCH_3}$ | $\nu_{Obs.}$ | $\nu_{Obs.} - \nu_{Calc.}$ | $E_{low}$ |
|------|--------|--------|-------|---------|---------|------|-------------|--------------|----------------------------|-----------|
| 30   | 7      | 24     | 30    | 6       | 25      | E    | 0           | 98223.828    | -0.001                     | 170.3797  |
| 30   | 7      | 24     | 30    | 6       | 25      | A    | 0           | 98232.242    | -0.001                     | 170.3712  |
| 25   | 7      | 18     | 24    | 8       | 17      | E    | 0           | 98243.048    | 0.056                      | 141.8177  |
| 31   | 10     | 22     | 31    | 9       | 23      | A    | 0           | 98264.215    | 0.003                      | 186.2560  |
| 16   | 4      | 13     | 15    | 4       | 12      | E    | 0           | 98355.356    | -0.019                     | 95.1424   |
| 16   | 4      | 13     | 15    | 4       | 12      | A    | 0           | 98356.672    | -0.023                     | 95.1317   |
| 33   | 10     | 24     | 33    | 9       | 25      | E    | 0           | 98452.625    | -0.033                     | 200.0366  |
| 33   | 10     | 24     | 33    | 9       | 25      | A    | 0           | 98486.394    | -0.006                     | 200.0297  |
| 21   | 1      | 20     | 21    | 0       | 21      | E    | 0           | 98552.034    | -0.000                     | 108.5069  |
| 21   | 2      | 20     | 21    | 1       | 21      | E    | 0           | 98553.439    | 0.011                      | 108.5069  |
| 21   | 1      | 20     | 21    | 0       | 21      | A    | 0           | 98569.508    | 0.053                      | 108.4953  |
| 21   | 2      | 20     | 21    | 1       | 21      | A    | 0           | 98570.910    | 0.055                      | 108.4953  |
| 32   | 8      | 25     | 32    | 7       | 26      | E    | 0           | 98649.064    | -0.002                     | 186.6232  |
| 21   | 2      | 20     | 21    | 1       | 21      | E    | 1           | 98650.520    | -0.010                     | 236.8343  |
| 32   | 8      | 25     | 32    | 7       | 26      | A    | 0           | 98658.625    | -0.008                     | 186.6153  |
| 16   | 12     | 4      | 15    | 12      | 3       | A    | 0           | 98663.388    | 0.003                      | 119.3420  |
| 16   | 12     | 5      | 15    | 12      | 4       | A    | 0           | 98663.388    | 0.003                      | 119.3420  |
| 16   | 12     | 5      | 15    | 12      | 4       | E    | 0           | 98663.829    | -0.000                     | 119.3375  |
| 30   | 10     | 21     | 30    | 9       | 22      | E    | 0           | 98687.098    | -0.035                     | 179.6904  |
| 34   | 11     | 23     | 34    | 10      | 24      | E    | 0           | 98701.555    | -0.066                     | 210.8962  |
| 30   | 10     | 21     | 30    | 9       | 22      | A    | 0           | 98743.706    | -0.006                     | 179.6836  |
| 34   | 11     | 23     | 34    | 10      | 24      | A    | 0           | 98744.689    | -0.004                     | 210.8893  |
| 16   | 11     | 6      | 15    | 11      | 5       | E    | 0           | 98780.403    | 0.056                      | 114.9626  |
| 15   | 4      | 11     | 14    | 4       | 10      | A    | 0           | 98839.214    | -0.012                     | 92.5375   |
| 15   | 4      | 11     | 14    | 4       | 10      | E    | 0           | 98839.871    | -0.005                     | 92.5486   |
| 16   | 10     | 6      | 15    | 10      | 5       | A    | 0           | 98933.561    | 0.019                      | 110.9751  |
| 16   | 10     | 6      | 15    | 10      | 5       | E    | 0           | 98933.561    | -0.161                     | 110.9863  |
| 16   | 10     | 7      | 15    | 10      | 6       | E    | 0           | 98934.272    | -0.019                     | 110.9737  |
| 17   | 3      | 14     | 16    | 4       | 13      | A    | 0           | 99000.821    | -0.019                     | 98.4126   |
| 17   | 3      | 14     | 16    | 4       | 13      | E    | 0           | 99008.544    | -0.005                     | 98.4232   |
| 48   | 18     | 31     | 47    | 19      | 29      | E    | 0           | 99045.003    | -0.006                     | 369.1958  |
| 17   | 2      | 15     | 16    | 3       | 14      | A    | 1           | 99049.516    | -0.009                     | 225.1722  |
| 48   | 18     | 30     | 47    | 19      | 28      | E    | 0           | 99062.497    | 0.006                      | 369.2068  |
| 17   | 2      | 15     | 16    | 3       | 14      | E    | 1           | 99092.491    | -0.052                     | 224.8197  |
| 17   | 2      | 15     | 16    | 3       | 14      | E    | 0           | 99107.858    | -0.020                     | 96.4852   |
| 17   | 2      | 15     | 16    | 3       | 14      | A    | 0           | 99108.708    | -0.028                     | 96.4743   |
| 16   | 9      | 7      | 15    | 9       | 6       | A    | 0           | 99143.584    | -0.030                     | 107.3727  |
| 16   | 9      | 7      | 15    | 9       | 6       | E    | 0           | 99143.584    | -0.112                     | 107.3848  |
| 16   | 9      | 8      | 15    | 9       | 7       | E    | 0           | 99144.547    | -0.017                     | 107.3730  |
| 34   | 10     | 25     | 34    | 9       | 26      | E    | 0           | 99356.549    | -0.023                     | 207.2272  |
| 34   | 10     | 25     | 34    | 9       | 26      | A    | 0           | 99385.606    | -0.017                     | 207.2204  |
| 29   | 10     | 20     | 29    | 9       | 21      | E    | 0           | 99398.917    | -0.022                     | 173.3331  |
| 11   | 4      | 8      | 10    | 3       | 7       | E    | 0           | 99441.451    | -0.045                     | 80.6474   |
| 16   | 8      | 9      | 15    | 8       | 8       | A    | 0           | 99441.959    | 0.032                      | 104.1621  |
| 16   | 8      | 8      | 15    | 8       | 7       | E    | 0           | 99443.373    | -0.013                     | 104.1748  |
| 16   | 8      | 8      | 15    | 8       | 7       | A    | 0           | 99444.693    | -0.060                     | 104.1621  |
| 16   | 8      | 9      | 15    | 8       | 8       | E    | 0           | 99444.693    | -0.022                     | 104.1640  |
| 11   | 4      | 8      | 10    | 3       | 7       | A    | 0           | 99463.453    | -0.004                     | 80.6360   |
| 29   | 10     | 20     | 29    | 9       | 21      | A    | 0           | 99473.084    | -0.003                     | 173.3265  |
| 17   | 3      | 15     | 16    | 3       | 14      | A    | 1           | 99506.967    | -0.022                     | 225.1722  |
| 17   | 3      | 15     | 16    | 3       | 14      | E    | 1           | 99578.123    | -0.047                     | 224.8197  |
| 17   | 3      | 15     | 16    | 3       | 14      | E    | 0           | 99585.881    | -0.022                     | 96.4852   |
| 17   | 3      | 15     | 16    | 3       | 14      | A    | 0           | 99587.916    | -0.033                     | 96.4743   |
| 27   | 10     | 17     | 27    | 9       | 18      | A    | 0           | 99701.267    | -0.002                     | 161.3293  |
| 18   | 1      | 17     | 17    | 2       | 16      | A    | 1           | 99715.100    | -0.009                     | 226.1485  |
| 18   | 2      | 17     | 17    | 2       | 16      | A    | 1           | 99725.966    | -0.008                     | 226.1485  |
| 18   | 1      | 17     | 17    | 1       | 16      | A    | 1           | 99736.621    | -0.001                     | 226.1478  |
| 18   | 2      | 17     | 17    | 1       | 16      | A    | 1           | 99747.478    | -0.010                     | 226.1478  |
| 6    | 6      | 1      | 5     | 5       | 1       | E    | 0           | 99752.486    | -0.028                     | 75.1025   |
| 18   | 1      | 17     | 17    | 2       | 16      | E    | 1           | 99758.273    | -0.036                     | 225.7869  |
| 18   | 2      | 17     | 17    | 2       | 16      | E    | 1           | 99769.995    | -0.065                     | 225.7869  |
| 18   | 1      | 17     | 17    | 2       | 16      | E    | 0           | 99774.052    | -0.025                     | 97.4539   |
| 18   | 1      | 17     | 17    | 2       | 16      | A    | 0           | 99775.361    | -0.027                     | 97.4427   |
| 18   | 1      | 17     | 17    | 1       | 16      | E    | 1           | 99781.407    | -0.026                     | 225.7861  |
| 18   | 2      | 17     | 17    | 2       | 16      | E    | 0           | 99785.534    | -0.018                     | 97.4539   |
| 18   | 2      | 17     | 17    | 2       | 16      | A    | 0           | 99786.875    | -0.023                     | 97.4427   |
| 6    | 6      | 0      | 5     | 5       | 0       | E    | 0           | 99790.808    | -0.045                     | 75.1100   |
| 18   | 2      | 17     | 17    | 1       | 16      | E    | 1           | 99793.141    | -0.043                     | 225.7861  |
| 6    | 6      | 0      | 5     | 5       | 1       | A    | 0           | 99796.087    | -0.006                     | 75.0962   |
| 18   | 1      | 17     | 17    | 1       | 16      | E    | 0           | 99796.701    | -0.021                     | 97.4532   |
| 18   | 1      | 17     | 17    | 1       | 16      | A    | 0           | 99798.072    | -0.026                     | 97.4419   |
| 18   | 2      | 17     | 17    | 1       | 16      | E    | 0           | 99808.170    | -0.027                     | 97.4532   |
| 18   | 2      | 17     | 17    | 1       | 16      | A    | 0           | 99809.581    | -0.027                     | 97.4419   |
| 17   | 2      | 15     | 16    | 2       | 14      | A    | 1           | 99860.674    | -0.004                     | 225.1452  |
| 16   | 7      | 10     | 15    | 7       | 9       | A    | 0           | 99874.003    | -0.033                     | 101.3494  |
| 16   | 7      | 10     | 15    | 7       | 9       | E    | 0           | 99896.567    | -0.013                     | 101.3535  |
| 16   | 7      | 9      | 15    | 7       | 8       | E    | 0           | 99904.942    | -0.035                     | 101.3633  |
| 54   | 15     | 39     | 54    | 14      | 40      | E    | 0           | 99917.678    | -0.026                     | 418.5013  |
| 16   | 7      | 9      | 15    | 7       | 8       | A    | 0           | 99925.623    | -0.030                     | 101.3506  |
| 17   | 2      | 15     | 16    | 2       | 14      | E    | 1           | 99947.982    | -0.054                     | 224.7911  |
| 17   | 2      | 15     | 16    | 2       | 14      | E    | 0           | 99952.550    | -0.019                     | 96.4570   |
| 17   | 2      | 15     | 16    | 2       | 14      | A    | 0           | 99955.335    | -0.022                     | 96.4460   |
| 19   | 1      | 19     | 18    | 1       | 18      | E    | 0           | 99958.637    | -0.144                     | 97.9908   |
| 19   | 0      | 19     | 18    | 1       | 18      | E    | 0           | 99958.638    | -0.046                     | 97.9908   |
| 19   | 0      | 19     | 18    | 1       | 18      | A    | 0           | 99959.016    | -0.084                     | 97.9791   |
| 19   | 1      | 19     | 18    | 0       | 18      | E    | 0           | 99959.016    | 0.028                      | 97.9907   |
| 19   | 1      | 19     | 18    | 0       | 18      | A    | 0           | 99959.390    | -0.015                     | 97.9791   |
| 54   | 15     | 39     | 54    | 14      | 40      | A    | 0           | 99981.942    | -0.012                     | 418.4957  |
| 34   | 9      | 26     | 34    | 8       | 27      | E    | 0           | 100029.478   | -0.020                     | 203.8906  |
| 23   | 2      | 21     | 23    | 1       | 22      | A    | 1           | 100041.040   | -0.011                     | 248.6730  |
| 34   | 9      | 26     | 34    | 8       | 27      | A    | 0           | 100043.027   | -0.012                     | 203.8833  |
| 23   | 3      | 21     | 23    | 2       | 22      | A    | 1           | 100051.113   | -0.011                     | 248.6730  |
| 49   | 14     | 35     | 49    | 13      | 36      | E    | 0           | 100088.991   | -0.043                     | 357.8881  |
| 49   | 14     | 35     | 49    | 13      | 36      | A    | 0           | 100162.198   | -0.002                     | 357.8821  |
| 28   | 10     | 19     | 28    | 9       | 20      | E    | 0           | 100250.406   | -0.040                     | 167.1944  |
| 16   | 5      | 12     | 15    | 5       | 11      | A    | 0           | 100295.117   | -0.027                     | 96.9164   |
| 16   | 5      | 12     | 15    | 5       | 11      | E    | 0           | 100296.050   | 0.003                      | 96.9265   |
| 17   | 3      | 15     | 16    | 2       | 14      | A    | 1           | 100318.144   | 0.002                      | 225.1452  |
| 28   | 10     | 19     | 28    | 9       | 20      | A    | 0           | 100351.936   | -0.014                     | 167.1879  |
| 16   | 6      | 11     | 15    | 6       | 10      | A    | 0           | 100380.028   | -0.022                     | 98.9419   |
| 16   | 6      | 11     | 15    | 6       | 10      | E    | 0           | 100394.949   | -0.019                     | 98.9503   |
| 31   | 6      | 25     | 31    | 5       | 26      | E    | 1           | 100411.334   | -0.204                     | 304.9246  |
| 17   | 3      | 15     | 16    | 2       | 14      | E    | 0           | 100430.563   | -0.029                     | 96.4570   |
| 17   | 3      | 15     | 16    | 2       | 14      | E    | 1           | 100433.642   | -0.021                     | 224.7911  |
| 17   | 3      | 15     | 16    | 2       | 14      | A    | 0           | 100434.545   | -0.025                     | 96.4460   |
| 23   | 2      | 21     | 23    | 1       | 22      | E    | 0           | 100488.071   | 0.009                      | 119.9909  |
| 23   | 3      | 21     | 23    | 2       | 22      | E    | 0           | 100498.809   | 0.008                      | 119.9909  |
| 23   | 2      | 21     | 23    | 1       | 22      | A    | 0           | 100503.979   | 0.042                      | 119.9800  |
| 23   | 3      | 21     | 23    | 2       | 22      | A    | 0           | 100514.751   | 0.036                      | 119.9800  |
| 8    | 5      | 4      | 7     | 4       | 3       | A    | 0           | 100516.586   | -0.022                     | 76.0681   |
| 8    | 5      | 4      | 7     | 4       | 3       | E    | 0           | 100547.757   | 0.041                      | 76.0735   |
| 23   | 2      | 21     | 23    | 1       | 22      | E    | 1           | 100559.630   | -0.042                     | 248.3201  |
| 8    | 5      | 3      | 7     | 4       | 3       | E    | 0           | 100561.334   | -0.031                     | 76.0805   |
| 39   | 12     | 27     | 39    | 11      | 28      | E    | 0           | 100574.727   | -0.057                     | 254.0775  |
| 8    | 5      | 3      | 7     | 4       | 4       | A    | 0           | 100633.313   | 0.029                      | 76.0645   |
| 39   | 12     | 27     | 39    | 11      | 28      | A    | 0           | 100636.220   | 0.002                      | 254.0710  |



| $J'$ | $K'_a$ | $K'_c$ | $J''$ | $K''_a$ | $K''_c$ | Sym. | $v_{tCH_3}$ | $\nu_{Obs.}$ | $\nu_{Obs.} - \nu_{Calc.}$ | $E_{low}$ |
|------|--------|--------|-------|---------|---------|------|-------------|--------------|----------------------------|-----------|
| 44   | 13     | 31     | 44    | 12      | 32      | E    | 0           | 100744.216   | -0.051                     | 303.0746  |
| 44   | 13     | 31     | 44    | 12      | 32      | A    | 0           | 100816.047   | -0.005                     | 303.0684  |
| 60   | 16     | 44     | 60    | 15      | 45      | E    | 0           | 100846.306   | -0.025                     | 498.1719  |
| 60   | 16     | 44     | 60    | 15      | 45      | A    | 0           | 100869.522   | -0.064                     | 498.1670  |
| 35   | 10     | 26     | 35    | 9       | 27      | E    | 0           | 100882.605   | -0.018                     | 214.6130  |
| 52   | 20     | 33     | 51    | 21      | 31      | E    | 0           | 100904.930   | -0.011                     | 425.2338  |
| 35   | 10     | 26     | 35    | 9       | 27      | A    | 0           | 100907.224   | -0.033                     | 214.6062  |
| 65   | 27     | 39     | 64    | 28      | 36      | A    | 0           | 100910.480   | -0.046                     | 645.7337  |
| 65   | 27     | 38     | 64    | 28      | 37      | A    | 0           | 100910.480   | -0.046                     | 645.7337  |
| 16   | 6      | 10     | 15    | 6       | 9       | E    | 0           | 100961.151   | -0.014                     | 98.9705   |
| 16   | 6      | 10     | 15    | 6       | 9       | A    | 0           | 100973.353   | -0.011                     | 98.9603   |
| 27   | 10     | 18     | 27    | 9       | 19      | E    | 0           | 101163.089   | -0.014                     | 161.2762  |
| 27   | 10     | 18     | 27    | 9       | 19      | A    | 0           | 101295.857   | -0.008                     | 161.2700  |
| 26   | 10     | 16     | 26    | 9       | 17      | A    | 0           | 101367.463   | 0.006                      | 155.6059  |
| 26   | 10     | 16     | 26    | 9       | 17      | E    | 0           | 101439.134   | -0.073                     | 155.6135  |
| 16   | 3      | 13     | 15    | 3       | 12      | A    | 1           | 101447.957   | 0.011                      | 223.4777  |
| 58   | 15     | 43     | 58    | 14      | 44      | E    | 0           | 101454.121   | -0.037                     | 468.4034  |
| 25   | 3      | 22     | 25    | 2       | 23      | A    | 1           | 101463.844   | 0.088                      | 261.2176  |
| 55   | 14     | 41     | 55    | 13      | 42      | A    | 0           | 101481.249   | -0.113                     | 427.3153  |
| 55   | 14     | 41     | 55    | 13      | 42      | E    | 0           | 101512.120   | -0.049                     | 427.3199  |
| 25   | 4      | 22     | 25    | 3       | 23      | A    | 1           | 101518.868   | 0.104                      | 261.2177  |
| 16   | 3      | 13     | 15    | 3       | 12      | E    | 1           | 101567.089   | -0.020                     | 223.1206  |
| 16   | 3      | 13     | 15    | 3       | 12      | E    | 0           | 101574.998   | -0.023                     | 94.7880   |
| 16   | 3      | 13     | 15    | 3       | 12      | A    | 0           | 101579.230   | -0.025                     | 94.7768   |
| 59   | 16     | 43     | 59    | 15      | 44      | E    | 0           | 101666.476   | -0.015                     | 484.8834  |
| 59   | 16     | 43     | 59    | 15      | 44      | A    | 0           | 101712.099   | -0.049                     | 484.8783  |
| 54   | 21     | 34     | 53    | 22      | 31      | A    | 0           | 101854.678   | -0.004                     | 455.0700  |
| 25   | 3      | 22     | 25    | 2       | 23      | E    | 0           | 101875.790   | 0.007                      | 132.5566  |
| 12   | 4      | 9      | 11    | 3       | 8       | E    | 0           | 101886.491   | -0.043                     | 83.0597   |
| 25   | 3      | 22     | 25    | 2       | 23      | A    | 0           | 101889.648   | 0.033                      | 132.5463  |
| 12   | 4      | 9      | 11    | 3       | 8       | A    | 0           | 101907.848   | -0.004                     | 83.0482   |
| 25   | 3      | 22     | 25    | 2       | 23      | E    | 1           | 101915.397   | -0.066                     | 260.8868  |
| 25   | 4      | 22     | 25    | 3       | 23      | E    | 0           | 101934.352   | 0.010                      | 132.5567  |
| 25   | 4      | 22     | 25    | 3       | 23      | A    | 0           | 101948.408   | 0.024                      | 132.5464  |
| 25   | 4      | 22     | 25    | 3       | 23      | E    | 1           | 101975.943   | -0.065                     | 260.8869  |
| 26   | 10     | 17     | 26    | 9       | 18      | E    | 0           | 102087.668   | -0.034                     | 155.5796  |
| 37   | 12     | 26     | 36    | 13      | 23      | E    | 0           | 102204.667   | 0.036                      | 237.5590  |
| 27   | 4      | 23     | 27    | 3       | 24      | A    | 1           | 102218.557   | 0.205                      | 274.8294  |
| 26   | 10     | 17     | 26    | 9       | 18      | A    | 0           | 102240.301   | -0.006                     | 155.5738  |
| 29   | 5      | 24     | 29    | 4       | 25      | E    | 1           | 102266.151   | -0.137                     | 289.2058  |
| 29   | 5      | 24     | 29    | 4       | 25      | E    | 0           | 102328.199   | 0.005                      | 160.8672  |
| 29   | 5      | 24     | 29    | 4       | 25      | A    | 0           | 102334.971   | 0.006                      | 160.8672  |
| 27   | 4      | 23     | 27    | 3       | 24      | E    | 1           | 102579.361   | -0.102                     | 274.5205  |
| 27   | 4      | 23     | 27    | 3       | 24      | E    | 0           | 102581.639   | 0.010                      | 146.1900  |
| 27   | 4      | 23     | 27    | 3       | 24      | A    | 0           | 102592.671   | 0.025                      | 146.1804  |
| 52   | 13     | 39     | 52    | 12      | 40      | E    | 0           | 102607.996   | -0.107                     | 388.3740  |
| 52   | 13     | 39     | 52    | 12      | 40      | E    | 0           | 102646.539   | -0.041                     | 388.3787  |
| 25   | 10     | 15     | 25    | 9       | 16      | A    | 0           | 102682.791   | 0.000                      | 150.1164  |
| 33   | 11     | 22     | 33    | 10      | 23      | E    | 0           | 102704.140   | -0.070                     | 203.5440  |
| 33   | 11     | 22     | 33    | 10      | 23      | A    | 0           | 102730.193   | -0.003                     | 203.5374  |
| 25   | 10     | 15     | 25    | 9       | 16      | E    | 0           | 102753.917   | -0.056                     | 150.1247  |
| 27   | 5      | 23     | 27    | 4       | 24      | E    | 0           | 102832.871   | 0.003                      | 146.1906  |
| 27   | 5      | 23     | 27    | 4       | 24      | E    | 1           | 102839.103   | -0.097                     | 274.5211  |
| 27   | 5      | 23     | 27    | 4       | 24      | A    | 0           | 102844.788   | 0.030                      | 146.1809  |
| 39   | 13     | 27     | 38    | 14      | 24      | A    | 0           | 102976.229   | -0.032                     | 258.1520  |
| 25   | 10     | 16     | 25    | 9       | 17      | E    | 0           | 102990.202   | -0.021                     | 150.1047  |
| 22   | 1      | 21     | 22    | 0       | 22      | A    | 1           | 103005.140   | -0.107                     | 241.0555  |
| 22   | 2      | 21     | 22    | 1       | 22      | A    | 1           | 103005.748   | -0.138                     | 241.0555  |
| 36   | 10     | 27     | 36    | 9       | 28      | E    | 0           | 103064.520   | -0.028                     | 222.1882  |
| 36   | 10     | 27     | 36    | 9       | 28      | A    | 0           | 103084.944   | -0.022                     | 222.1815  |
| 25   | 10     | 16     | 25    | 9       | 17      | A    | 0           | 103140.883   | 0.009                      | 150.0998  |
| 39   | 13     | 27     | 38    | 14      | 25      | E    | 0           | 103171.338   | -0.045                     | 258.1456  |
| 29   | 6      | 24     | 29    | 5       | 25      | E    | 1           | 103188.080   | -0.105                     | 289.2087  |
| 29   | 6      | 24     | 29    | 5       | 25      | E    | 0           | 103220.703   | 0.003                      | 160.8789  |
| 29   | 6      | 24     | 29    | 5       | 25      | A    | 0           | 103230.443   | 0.008                      | 160.8700  |
| 31   | 7      | 25     | 31    | 6       | 26      | E    | 0           | 103251.893   | 0.003                      | 176.6082  |
| 31   | 7      | 25     | 31    | 6       | 26      | A    | 0           | 103260.090   | 0.005                      | 176.5999  |
| 33   | 8      | 26     | 33    | 7       | 27      | E    | 0           | 103290.532   | -0.009                     | 193.3665  |
| 33   | 8      | 26     | 33    | 7       | 27      | A    | 0           | 103298.763   | -0.011                     | 193.3588  |
| 25   | 10     | 15     | 25    | 9       | 17      | E    | 0           | 103353.707   | -0.047                     | 150.1047  |
| 39   | 13     | 26     | 38    | 14      | 24      | E    | 0           | 103395.344   | 0.042                      | 258.1586  |
| 34   | 7      | 27     | 34    | 6       | 28      | E    | 1           | 103412.036   | -0.250                     | 328.5819  |
| 7    | 2      | 6      | 6     | 3       | 3       | A    | 0           | 10347.064    | -0.016                     | 73.3142   |
| 39   | 13     | 26     | 38    | 14      | 25      | A    | 0           | 103486.777   | -0.030                     | 258.1512  |
| 22   | 1      | 21     | 22    | 0       | 22      | E    | 0           | 103502.674   | -0.002                     | 112.3546  |
| 22   | 1      | 21     | 22    | 1       | 22      | E    | 0           | 103502.674   | 0.008                      | 112.3546  |
| 22   | 2      | 21     | 22    | 0       | 22      | E    | 0           | 103503.366   | -0.004                     | 112.3546  |
| 22   | 2      | 21     | 22    | 0       | 22      | E    | 0           | 103503.366   | -0.004                     | 112.3546  |
| 22   | 2      | 21     | 22    | 0       | 22      | E    | 0           | 103503.366   | -0.004                     | 112.3546  |
| 22   | 2      | 21     | 22    | 1       | 22      | E    | 0           | 103503.366   | 0.005                      | 112.3546  |
| 7    | 2      | 6      | 6     | 3       | 3       | E    | 0           | 10351.164    | -0.004                     | 73.3256   |
| 22   | 1      | 21     | 22    | 0       | 22      | A    | 0           | 103521.083   | 0.060                      | 112.3430  |
| 22   | 2      | 21     | 22    | 1       | 22      | A    | 0           | 103521.758   | 0.048                      | 112.3430  |
| 41   | 14     | 28     | 40    | 15      | 25      | A    | 0           | 103576.399   | -0.035                     | 279.9589  |
| 22   | 1      | 21     | 22    | 0       | 22      | E    | 1           | 103605.362   | -0.004                     | 240.6811  |
| 22   | 2      | 21     | 22    | 1       | 22      | E    | 1           | 103606.071   | -0.003                     | 240.6811  |
| 37   | 12     | 25     | 36    | 13      | 24      | A    | 0           | 103642.344   | -0.029                     | 237.5495  |
| 34   | 7      | 27     | 34    | 6       | 28      | A    | 0           | 103654.366   | -0.016                     | 200.2513  |
| 34   | 7      | 27     | 34    | 6       | 28      | E    | 0           | 103660.745   | 0.006                      | 200.2589  |
| 16   | 5      | 11     | 15    | 5       | 10      | A    | 0           | 103689.616   | -0.041                     | 97.0846   |
| 16   | 5      | 11     | 15    | 5       | 10      | E    | 0           | 103691.883   | -0.023                     | 97.0950   |
| 41   | 14     | 28     | 40    | 15      | 26      | E    | 0           | 103707.488   | -0.029                     | 279.9516  |
| 24   | 10     | 14     | 24    | 9       | 15      | A    | 0           | 103740.377   | 0.012                      | 144.8557  |
| 41   | 14     | 27     | 40    | 15      | 25      | E    | 0           | 103740.934   | -0.116                     | 279.9645  |
| 24   | 10     | 14     | 24    | 9       | 15      | E    | 0           | 103789.793   | -0.055                     | 144.8650  |
| 13   | 4      | 10     | 12    | 3       | 9       | E    | 0           | 103826.766   | -0.104                     | 85.6920   |
| 17   | 4      | 14     | 16    | 4       | 13      | A    | 1           | 103833.389   | 0.005                      | 227.1013  |
| 24   | 10     | 15     | 24    | 9       | 16      | E    | 0           | 103842.923   | -0.031                     | 144.8511  |
| 23   | 6      | 17     | 22    | 7       | 16      | A    | 0           | 103844.665   | -0.033                     | 129.2340  |
| 13   | 4      | 10     | 12    | 3       | 9       | A    | 0           | 103847.682   | -0.014                     | 85.6806   |
| 58   | 23     | 36     | 57    | 24      | 33      | A    | 0           | 103862.172   | -0.038                     | 518.3256  |
| 23   | 6      | 17     | 22    | 7       | 16      | E    | 0           | 103894.805   | 0.036                      | 129.2426  |
| 17   | 4      | 14     | 16    | 4       | 13      | E    | 0           | 103915.460   | -0.014                     | 98.4232   |
| 17   | 4      | 14     | 16    | 4       | 13      | A    | 0           | 103917.208   | -0.010                     | 98.4126   |
| 35   | 9      | 27     | 35    | 8       | 28      | E    | 0           | 103932.737   | -0.029                     | 211.1462  |
| 17   | 4      | 14     | 16    | 4       | 13      | E    | 1           | 103935.430   | -0.039                     | 226.7561  |
| 35   | 9      | 27     | 35    | 8       | 28      | A    | 0           | 103943.584   | -0.017                     | 211.1390  |
| 24   | 10     | 15     | 24    | 9       | 16      | A    | 0           | 103970.794   | -0.002                     | 144.8474  |
| 24   | 10     | 14     | 24    | 9       | 16      | E    | 0           | 104206.980   | -0.361                     | 144.8511  |
| 49   | 12     | 37     | 49    | 11      | 38      | A    | 0           | 104223.397   | -0.091                     | 351.5819  |
| 49   | 12     | 37     | 49    | 11      | 38      | E    | 0           | 104263.930   | -0.022                     | 351.5869  |
| 43   | 15     | 28     | 42    | 16      | 27      | A    | 0           | 104289.290   | 0.014                      | 302.9715  |
| 43   | 15     | 28     | 42    | 16      | 26      | E    | 0           | 104306.300   | 0.045                      | 302.9758  |
| 18   | 2      | 16     | 17    | 3       | 15      | A    | 1           | 104423.210   | -0.007                     | 228.4914  |
| 18   | 2      | 16     | 17    | 3       | 15      | E    | 1           | 104478.155   | -0.038                     | 228.1413  |
| 18   | 2      | 16     | 17    | 3       | 15      | E    | 0           | 104492.747   | 0.015                      | 99.8070   |



| $J'$ | $K'_a$ | $K'_c$ | $J''$ | $K''_a$ | $K''_c$ | Sym. | $v_{tCH_3}$ | $\nu_{Obs.}$ | $\nu_{Obs.} - \nu_{Calc.}$ | $E_{low}$ |
|------|--------|--------|-------|---------|---------|------|-------------|--------------|----------------------------|-----------|
| 18   | 2      | 16     | 17    | 3       | 15      | A    | 0           | 104494.171   | 0.014                      | 99.7962   |
| 23   | 10     | 13     | 23    | 9       | 14      | A    | 0           | 104606.109   | 0.056                      | 139.8199  |
| 23   | 10     | 14     | 23    | 9       | 15      | E    | 0           | 104619.046   | 0.016                      | 139.8183  |
| 23   | 10     | 13     | 23    | 9       | 14      | E    | 0           | 104626.515   | -0.056                     | 139.8303  |
| 35   | 11     | 24     | 34    | 12      | 23      | A    | 0           | 104632.908   | -0.117                     | 218.1539  |
| 18   | 3      | 16     | 17    | 3       | 15      | A    | 1           | 104675.838   | 0.020                      | 228.4914  |
| 23   | 10     | 14     | 23    | 9       | 15      | A    | 0           | 104717.010   | 0.001                      | 139.8159  |
| 18   | 3      | 16     | 17    | 3       | 15      | E    | 1           | 104748.042   | -0.015                     | 228.1413  |
| 10   | 4      | 6      | 9     | 3       | 7       | E    | 0           | 104755.319   | -0.006                     | 78.2400   |
| 18   | 3      | 16     | 17    | 3       | 15      | E    | 0           | 104757.580   | -0.003                     | 99.8070   |
| 18   | 3      | 16     | 17    | 3       | 15      | A    | 0           | 104759.705   | -0.013                     | 99.7962   |
| 10   | 4      | 6      | 9     | 3       | 7       | A    | 0           | 104763.519   | 0.011                      | 78.2287   |
| 19   | 1      | 18     | 18    | 2       | 17      | A    | 1           | 104848.280   | 0.002                      | 229.4750  |
| 19   | 2      | 18     | 18    | 2       | 17      | A    | 1           | 104853.728   | 0.016                      | 229.4750  |
| 19   | 1      | 18     | 18    | 1       | 17      | A    | 1           | 104859.151   | 0.008                      | 229.4747  |
| 19   | 2      | 18     | 18    | 1       | 17      | A    | 1           | 104864.609   | 0.032                      | 229.4747  |
| 18   | 2      | 16     | 17    | 2       | 15      | A    | 1           | 104880.672   | -0.009                     | 228.4762  |
| 60   | 24     | 37     | 59    | 25      | 34      | A    | 0           | 104889.281   | -0.001                     | 551.7567  |
| 19   | 1      | 18     | 18    | 2       | 17      | E    | 1           | 104891.708   | -0.038                     | 229.1149  |
| 19   | 2      | 18     | 18    | 2       | 17      | E    | 1           | 104897.680   | 0.020                      | 229.1149  |
| 19   | 1      | 18     | 18    | 1       | 17      | E    | 1           | 104903.442   | -0.056                     | 229.1145  |
| 19   | 1      | 18     | 18    | 2       | 17      | E    | 0           | 104908.793   | -0.014                     | 100.7824  |
| 19   | 2      | 18     | 18    | 1       | 17      | E    | 1           | 104909.392   | -0.019                     | 229.1145  |
| 19   | 1      | 18     | 18    | 2       | 17      | A    | 0           | 104910.107   | -0.025                     | 100.7712  |
| 19   | 2      | 18     | 18    | 2       | 17      | E    | 0           | 104914.545   | -0.021                     | 100.7824  |
| 19   | 2      | 18     | 18    | 2       | 17      | A    | 0           | 104915.899   | -0.010                     | 100.7712  |
| 19   | 1      | 18     | 18    | 1       | 17      | E    | 0           | 104920.259   | -0.023                     | 100.7820  |
| 19   | 1      | 18     | 18    | 1       | 17      | A    | 0           | 104921.626   | -0.016                     | 100.7708  |
| 19   | 2      | 18     | 18    | 1       | 17      | E    | 0           | 104926.024   | -0.017                     | 100.7820  |
| 19   | 2      | 18     | 18    | 1       | 17      | A    | 0           | 104927.406   | -0.014                     | 100.7708  |
| 18   | 2      | 16     | 17    | 2       | 15      | E    | 0           | 104970.732   | -0.024                     | 99.7911   |
| 18   | 2      | 16     | 17    | 2       | 15      | A    | 0           | 104973.363   | -0.007                     | 99.7802   |
| 24   | 3      | 22     | 24    | 2       | 23      | A    | 1           | 105014.671   | 0.051                      | 253.0257  |
| 20   | 0      | 20     | 19    | 0       | 19      | A    | 1           | 105051.737   | -0.022                     | 230.0297  |
| 20   | 0      | 20     | 19    | 1       | 19      | A    | 1           | 105051.737   | 0.069                      | 230.0298  |
| 20   | 1      | 20     | 19    | 0       | 19      | A    | 1           | 105051.737   | -0.065                     | 230.0297  |
| 20   | 1      | 20     | 19    | 1       | 19      | A    | 1           | 105051.737   | 0.026                      | 230.0298  |
| 20   | 0      | 20     | 19    | 0       | 19      | E    | 1           | 105065.099   | -0.050                     | 229.6540  |
| 20   | 0      | 20     | 19    | 1       | 19      | E    | 1           | 105065.099   | 0.050                      | 229.6540  |
| 20   | 1      | 20     | 19    | 0       | 19      | E    | 1           | 105065.099   | -0.097                     | 229.6540  |
| 20   | 1      | 20     | 19    | 1       | 19      | E    | 1           | 105065.099   | 0.003                      | 229.6540  |
| 20   | 0      | 20     | 19    | 0       | 19      | E    | 0           | 105089.148   | -0.052                     | 101.3250  |
| 20   | 0      | 20     | 19    | 1       | 19      | E    | 0           | 105089.148   | 0.045                      | 101.3250  |
| 20   | 1      | 20     | 19    | 0       | 19      | E    | 0           | 105089.148   | -0.098                     | 101.3250  |
| 20   | 1      | 20     | 19    | 1       | 19      | E    | 0           | 105089.148   | -0.000                     | 101.3250  |
| 20   | 0      | 20     | 19    | 0       | 19      | A    | 0           | 105089.571   | -0.042                     | 101.3134  |
| 20   | 0      | 20     | 19    | 1       | 19      | A    | 0           | 105089.571   | 0.055                      | 101.3134  |
| 20   | 1      | 20     | 19    | 0       | 19      | A    | 0           | 105089.571   | -0.088                     | 101.3134  |
| 20   | 1      | 20     | 19    | 1       | 19      | A    | 0           | 105089.571   | 0.10                       | 101.3134  |
| 28   | 8      | 20     | 27    | 9       | 19      | A    | 0           | 105113.353   | -0.078                     | 161.2700  |
| 18   | 3      | 16     | 17    | 2       | 15      | A    | 1           | 105133.294   | 0.012                      | 228.4762  |
| 58   | 16     | 42     | 58    | 15      | 43      | E    | 0           | 105167.020   | -0.013                     | 471.7876  |
| 28   | 8      | 20     | 27    | 9       | 19      | E    | 0           | 105189.125   | 0.048                      | 161.2762  |
| 58   | 16     | 42     | 58    | 15      | 43      | A    | 0           | 105231.649   | -0.025                     | 471.7824  |
| 18   | 3      | 16     | 17    | 2       | 15      | E    | 0           | 105235.601   | -0.006                     | 99.7911   |
| 17   | 10     | 7      | 16    | 10      | 6       | A    | 0           | 105236.552   | 0.028                      | 114.2752  |
| 17   | 10     | 7      | 16    | 10      | 6       | E    | 0           | 105236.552   | -0.169                     | 114.2864  |
| 17   | 10     | 8      | 16    | 10      | 7       | E    | 0           | 105237.416   | -0.008                     | 114.2738  |
| 18   | 3      | 16     | 17    | 2       | 15      | A    | 0           | 105238.909   | -0.022                     | 99.7802   |
| 22   | 10     | 13     | 22    | 9       | 14      | E    | 0           | 105300.925   | -0.022                     | 135.0057  |
| 22   | 10     | 12     | 22    | 9       | 13      | E    | 0           | 105323.330   | -0.030                     | 135.0172  |
| 22   | 10     | 12     | 22    | 9       | 13      | A    | 0           | 105324.982   | -0.020                     | 135.0060  |
| 22   | 10     | 13     | 22    | 9       | 14      | A    | 0           | 105376.019   | -0.012                     | 135.0042  |
| 16   | 4      | 12     | 15    | 4       | 11      | E    | 0           | 105461.271   | -0.025                     | 95.8455   |
| 16   | 4      | 12     | 15    | 4       | 11      | A    | 0           | 105461.706   | 0.003                      | 95.8345   |
| 24   | 2      | 22     | 24    | 1       | 23      | E    | 0           | 105480.727   | 0.018                      | 124.3458  |
| 14   | 4      | 11     | 13    | 3       | 10      | E    | 0           | 105483.535   | -0.039                     | 88.5330   |
| 24   | 3      | 22     | 24    | 2       | 23      | E    | 0           | 105486.259   | 0.031                      | 124.3458  |
| 53   | 15     | 38     | 53    | 14      | 39      | E    | 0           | 105487.867   | -0.005                     | 406.5197  |
| 17   | 9      | 9      | 16    | 9       | 8       | E    | 0           | 105491.339   | -0.008                     | 110.6801  |
| 24   | 2      | 22     | 24    | 1       | 23      | A    | 0           | 105497.540   | 0.041                      | 124.3349  |
| 24   | 3      | 22     | 24    | 2       | 23      | A    | 0           | 105503.077   | 0.038                      | 124.3349  |
| 14   | 4      | 11     | 13    | 3       | 10      | A    | 0           | 105503.615   | 0.007                      | 88.5216   |
| 24   | 2      | 22     | 24    | 1       | 23      | E    | 1           | 105557.854   | -0.039                     | 252.6742  |
| 24   | 3      | 22     | 24    | 2       | 23      | E    | 1           | 105563.566   | -0.047                     | 252.6742  |
| 53   | 15     | 38     | 53    | 14      | 39      | A    | 0           | 105563.980   | -0.001                     | 406.5143  |
| 47   | 17     | 31     | 46    | 18      | 29      | E    | 0           | 105735.645   | -0.008                     | 352.6012  |
| 37   | 8      | 29     | 37    | 7       | 30      | A    | 0           | 105742.498   | -0.017                     | 226.1285  |
| 47   | 17     | 30     | 46    | 18      | 28      | E    | 0           | 105746.530   | 0.026                      | 352.6129  |
| 46   | 11     | 35     | 46    | 10      | 36      | A    | 0           | 105749.175   | -0.079                     | 316.9495  |
| 37   | 8      | 29     | 37    | 7       | 30      | E    | 0           | 105756.540   | 0.012                      | 226.1355  |
| 46   | 11     | 35     | 46    | 10      | 36      | E    | 0           | 105786.691   | -0.021                     | 316.9548  |
| 19   | 4      | 15     | 18    | 5       | 14      | A    | 0           | 105795.375   | -0.009                     | 107.5622  |
| 19   | 4      | 15     | 18    | 5       | 14      | E    | 0           | 105815.169   | 0.022                      | 107.5722  |
| 17   | 8      | 10     | 16    | 8       | 9       | A    | 0           | 105850.574   | -0.001                     | 107.4791  |
| 17   | 8      | 9      | 16    | 8       | 8       | E    | 0           | 105854.346   | -0.004                     | 107.4919  |
| 17   | 8      | 10     | 16    | 8       | 9       | E    | 0           | 105855.822   | -0.013                     | 107.4811  |
| 17   | 8      | 9      | 16    | 8       | 8       | A    | 0           | 105857.868   | -0.040                     | 107.4793  |
| 38   | 12     | 26     | 38    | 11      | 27      | E    | 0           | 105860.899   | -0.050                     | 245.5674  |
| 21   | 10     | 12     | 21    | 9       | 13      | E    | 0           | 105888.652   | -0.002                     | 130.4119  |
| 7    | 6      | 2      | 6     | 5       | 2       | E    | 0           | 105898.466   | -0.024                     | 76.3356   |
| 37   | 10     | 28     | 37    | 9       | 29      | E    | 0           | 105899.770   | -0.015                     | 229.9478  |
| 37   | 10     | 28     | 37    | 9       | 29      | A    | 0           | 105916.243   | -0.020                     | 229.9412  |
| 21   | 10     | 11     | 21    | 9       | 12      | A    | 0           | 105928.061   | 0.033                      | 130.4118  |
| 7    | 6      | 1      | 6     | 5       | 1       | E    | 0           | 105936.821   | -0.053                     | 76.3431   |
| 7    | 6      | 1      | 6     | 5       | 2       | A    | 0           | 105942.085   | -0.205                     | 76.3293   |
| 21   | 10     | 12     | 21    | 9       | 13      | A    | 0           | 105950.380   | 0.005                      | 130.4110  |
| 18   | 3      | 15     | 17    | 4       | 14      | A    | 0           | 106240.909   | -0.003                     | 101.8789  |
| 18   | 3      | 15     | 17    | 4       | 14      | E    | 0           | 106245.532   | 0.013                      | 101.8894  |
| 17   | 3      | 14     | 16    | 3       | 13      | A    | 1           | 106277.733   | 0.031                      | 226.8616  |
| 17   | 7      | 11     | 16    | 7       | 10      | A    | 0           | 106359.202   | -0.001                     | 104.6809  |
| 20   | 10     | 11     | 20    | 9       | 12      | E    | 0           | 106390.924   | -0.024                     | 126.0357  |
| 17   | 7      | 11     | 16    | 7       | 10      | E    | 0           | 106393.222   | 0.002                      | 104.6857  |
| 17   | 3      | 14     | 16    | 3       | 13      | E    | 0           | 106414.302   | -0.023                     | 98.1762   |
| 20   | 10     | 10     | 20    | 9       | 11      | E    | 0           | 106415.782   | -0.052                     | 126.0473  |
| 17   | 3      | 14     | 16    | 3       | 13      | A    | 0           | 106419.088   | -0.002                     | 98.1651   |
| 17   | 5      | 13     | 16    | 5       | 12      | A    | 0           | 106428.230   | 0.032                      | 100.2619  |
| 17   | 5      | 13     | 16    | 5       | 12      | E    | 0           | 106428.230   | -0.068                     | 100.2720  |
| 20   | 10     | 10     | 20    | 9       | 11      | A    | 0           | 106436.651   | 0.094                      | 126.0354  |
| 17   | 7      | 10     | 16    | 7       | 9       | E    | 0           | 106440.832   | -0.005                     | 104.6958  |
| 9    | 5      | 5      | 8     | 4       | 4       | A    | 0           | 106443.525   | 0.006                      | 77.7314   |
| 20   | 10     | 11     | 20    | 9       | 12      | A    | 0           | 106445.806   | -0.032                     | 126.0351  |
| 17   | 7      | 10     | 16    | 7       | 9       | A    | 0           | 106472.575   | -0.006                     | 104.6838  |
| 26   | 3      | 23     | 26    | 2       | 24      | A    | 1           | 106515.717   | 0.108                      | 266.0776  |
| 26   | 4      | 23     | 26    | 3       | 24      | A    | 1           | 106545.206   | 0.129                      | 266.0777  |
| 48   | 14     | 34     | 48    | 13      | 35      | E    | 0           | 106557.125   | -0.031                     | 347.0498  |



| $J'$ | $K'_a$ | $K'_c$ | $J''$ | $K''_a$ | $K''_c$ | Sym. | $v_{tCH_3}$ | $\nu_{Obs.}$ | $\nu_{Obs.} - \nu_{Calc.}$ | $E_{low}$ |
|------|--------|--------|-------|---------|---------|------|-------------|--------------|----------------------------|-----------|
| 49   | 18     | 31     | 48    | 19      | 29      | E    | 0           | 106563.849   | -0.022                     | 379.2377  |
| 64   | 17     | 47     | 64    | 16      | 48      | E    | 0           | 106571.687   | 0.002                      | 556.9939  |
| 64   | 17     | 47     | 64    | 16      | 48      | A    | 0           | 106591.835   | -0.064                     | 556.9895  |
| 32   | 6      | 26     | 32    | 5       | 27      | E    | 1           | 106613.022   | -0.155                     | 311.3277  |
| 48   | 14     | 34     | 48    | 13      | 35      | A    | 0           | 106634.205   | 0.013                      | 347.0442  |
| 43   | 10     | 33     | 43    | 9       | 34      | A    | 0           | 106702.361   | -0.059                     | 284.4885  |
| 15   | 4      | 12     | 14    | 3       | 11      | A    | 1           | 106728.242   | 0.028                      | 220.2629  |
| 43   | 10     | 33     | 43    | 9       | 34      | E    | 0           | 106733.318   | -0.006                     | 284.4943  |
| 32   | 6      | 26     | 32    | 5       | 27      | E    | 0           | 106739.177   | 0.010                      | 183.0008  |
| 32   | 6      | 26     | 32    | 5       | 27      | A    | 0           | 106741.940   | 0.005                      | 182.9926  |
| 40   | 9      | 31     | 40    | 8       | 32      | A    | 0           | 106753.312   | -0.045                     | 254.2111  |
| 40   | 9      | 31     | 40    | 8       | 32      | E    | 0           | 106775.927   | 0.014                      | 254.2174  |
| 9    | 5      | 4      | 8     | 4       | 5       | A    | 0           | 106790.179   | 0.017                      | 77.7211   |
| 19   | 10     | 10     | 19    | 9       | 11      | E    | 0           | 106818.071   | -0.012                     | 121.8756  |
| 19   | 10     | 9      | 19    | 9       | 10      | E    | 0           | 106842.421   | -0.032                     | 121.8872  |
| 17   | 6      | 12     | 16    | 6       | 11      | A    | 0           | 106854.053   | -0.007                     | 102.2902  |
| 17   | 6      | 12     | 16    | 6       | 11      | E    | 0           | 106861.487   | -0.010                     | 102.2991  |
| 19   | 10     | 10     | 19    | 9       | 11      | A    | 0           | 106869.605   | -0.077                     | 121.8751  |
| 36   | 11     | 26     | 36    | 10      | 27      | E    | 0           | 106932.853   | -0.021                     | 225.6261  |
| 26   | 3      | 23     | 26    | 2       | 24      | E    | 0           | 106952.617   | 0.022                      | 137.4197  |
| 26   | 3      | 23     | 26    | 2       | 24      | A    | 0           | 106967.458   | 0.062                      | 137.4095  |
| 36   | 11     | 26     | 36    | 10      | 27      | A    | 0           | 106972.595   | 0.001                      | 225.6200  |
| 26   | 4      | 23     | 26    | 3       | 24      | E    | 0           | 106984.077   | 0.006                      | 137.4198  |
| 26   | 4      | 23     | 26    | 3       | 24      | E    | 1           | 106998.472   | -0.091                     | 265.7493  |
| 26   | 4      | 23     | 26    | 3       | 24      | A    | 0           | 106999.058   | 0.067                      | 137.4095  |
| 43   | 13     | 30     | 43    | 12      | 31      | E    | 0           | 107005.094   | -0.036                     | 293.3980  |
| 26   | 4      | 23     | 26    | 3       | 24      | E    | 1           | 107031.163   | -0.038                     | 265.7493  |
| 63   | 17     | 46     | 63    | 16      | 47      | E    | 0           | 107043.209   | -0.006                     | 542.8194  |
| 35   | 11     | 25     | 35    | 10      | 26      | E    | 0           | 107068.664   | -0.034                     | 217.9781  |
| 43   | 13     | 30     | 43    | 12      | 31      | A    | 0           | 107073.653   | -0.001                     | 293.3922  |
| 63   | 17     | 46     | 63    | 16      | 47      | A    | 0           | 107086.946   | -0.057                     | 542.8147  |
| 35   | 11     | 25     | 35    | 10      | 26      | A    | 0           | 107114.800   | -0.002                     | 217.9721  |
| 33   | 10     | 23     | 32    | 11      | 22      | A    | 0           | 107128.848   | -0.023                     | 199.9640  |
| 15   | 4      | 12     | 14    | 3       | 11      | A    | 0           | 107130.647   | 0.006                      | 91.5582   |
| 21   | 5      | 16     | 20    | 6       | 15      | E    | 0           | 107147.309   | 0.037                      | 117.8359  |
| 18   | 10     | 9      | 18    | 9       | 10      | E    | 0           | 107179.509   | 0.002                      | 117.9304  |
| 18   | 10     | 8      | 18    | 9       | 9       | E    | 0           | 107203.317   | -0.050                     | 117.9421  |
| 37   | 11     | 27     | 37    | 10      | 28      | E    | 0           | 107290.326   | -0.033                     | 233.4802  |
| 37   | 11     | 27     | 37    | 10      | 28      | A    | 0           | 107324.770   | -0.004                     | 233.4742  |
| 17   | 10     | 8      | 17    | 9       | 9       | E    | 0           | 107483.531   | -0.002                     | 114.1989  |
| 17   | 10     | 7      | 17    | 9       | 8       | E    | 0           | 107596.934   | -0.021                     | 114.2106  |
| 17   | 10     | 8      | 17    | 9       | 9       | A    | 0           | 107532.543   | -0.203                     | 114.1986  |
| 34   | 11     | 24     | 34    | 10      | 25      | E    | 0           | 107590.949   | -0.005                     | 210.5414  |
| 34   | 11     | 24     | 34    | 10      | 25      | A    | 0           | 107646.025   | 0.008                      | 210.5355  |
| 16   | 10     | 7      | 16    | 9       | 8       | E    | 0           | 107737.447   | -0.008                     | 110.6801  |
| 16   | 10     | 6      | 16    | 9       | 7       | E    | 0           | 107760.484   | -0.030                     | 110.6798  |
| 16   | 10     | 7      | 16    | 9       | 8       | A    | 0           | 107786.166   | -0.042                     | 110.6798  |
| 28   | 4      | 24     | 28    | 3       | 25      | E    | 0           | 107819.302   | 0.013                      | 151.5631  |
| 28   | 4      | 24     | 28    | 3       | 25      | E    | 1           | 107825.823   | -0.086                     | 279.8930  |
| 28   | 4      | 24     | 28    | 3       | 25      | A    | 0           | 107831.517   | 0.036                      | 151.5536  |
| 30   | 5      | 25     | 30    | 4       | 26      | E    | 1           | 107835.908   | -0.125                     | 295.0912  |
| 30   | 5      | 25     | 30    | 4       | 26      | E    | 0           | 107882.691   | 0.011                      | 166.7621  |
| 30   | 5      | 25     | 30    | 4       | 26      | A    | 0           | 107891.205   | 0.021                      | 166.7532  |
| 17   | 6      | 11     | 16    | 6       | 10      | E    | 0           | 107928.715   | 0.003                      | 102.3383  |
| 17   | 6      | 11     | 16    | 6       | 10      | A    | 0           | 107932.777   | -0.003                     | 102.3284  |
| 15   | 10     | 6      | 15    | 9       | 7       | E    | 0           | 107947.726   | -0.002                     | 107.3730  |
| 28   | 5      | 24     | 28    | 4       | 25      | E    | 0           | 107960.570   | 0.019                      | 151.5634  |
| 15   | 10     | 5      | 15    | 9       | 6       | E    | 0           | 107970.440   | -0.047                     | 107.3848  |
| 28   | 5      | 24     | 28    | 4       | 25      | E    | 1           | 107972.300   | -0.092                     | 279.8933  |
| 28   | 5      | 24     | 28    | 4       | 25      | A    | 0           | 107973.326   | 0.062                      | 151.5539  |
| 15   | 10     | 6      | 15    | 9       | 7       | A    | 0           | 107996.183   | 0.004                      | 107.3727  |
| 34   | 8      | 27     | 34    | 7       | 28      | E    | 1           | 108105.396   | -0.091                     | 328.6050  |
| 14   | 10     | 4      | 14    | 9       | 5       | E    | 0           | 108142.569   | -0.046                     | 104.2885  |
| 14   | 10     | 5      | 14    | 9       | 6       | A    | 0           | 108168.343   | 0.013                      | 104.2765  |
| 34   | 8      | 27     | 34    | 7       | 28      | E    | 0           | 108211.794   | -0.007                     | 200.2811  |
| 34   | 8      | 27     | 34    | 7       | 28      | A    | 0           | 108219.210   | -0.009                     | 200.2735  |
| 38   | 11     | 28     | 38    | 10      | 29      | E    | 0           | 108230.810   | -0.029                     | 241.5348  |
| 13   | 10     | 4      | 13    | 9       | 5       | E    | 0           | 108259.699   | -0.027                     | 101.3904  |
| 38   | 11     | 28     | 38    | 10      | 29      | A    | 0           | 108260.339   | -0.009                     | 241.5288  |
| 13   | 10     | 3      | 13    | 9       | 4       | E    | 0           | 108281.995   | -0.048                     | 101.4022  |
| 36   | 9      | 28     | 36    | 8       | 29      | E    | 0           | 108299.061   | -0.004                     | 218.5757  |
| 32   | 7      | 26     | 32    | 6       | 27      | E    | 1           | 108340.910   | -0.126                     | 311.3343  |
| 30   | 6      | 25     | 30    | 5       | 26      | E    | 1           | 108381.172   | -0.099                     | 295.0928  |
| 33   | 11     | 23     | 33    | 10      | 24      | E    | 0           | 108386.778   | -0.017                     | 203.3206  |
| 12   | 10     | 2      | 12    | 9       | 3       | E    | 0           | 108393.367   | -0.038                     | 98.7252   |
| 30   | 6      | 25     | 30    | 5       | 26      | E    | 0           | 108408.824   | 0.014                      | 166.7636  |
| 32   | 7      | 26     | 32    | 6       | 27      | E    | 0           | 108409.172   | 0.008                      | 183.0070  |
| 32   | 7      | 26     | 32    | 6       | 27      | A    | 0           | 108417.495   | 0.009                      | 182.9989  |
| 30   | 6      | 25     | 30    | 5       | 26      | A    | 0           | 108419.193   | 0.019                      | 166.7548  |
| 12   | 10     | 2      | 12    | 9       | 3       | A    | 0           | 108419.193   | 0.026                      | 98.7132   |
| 12   | 10     | 3      | 12    | 9       | 4       | A    | 0           | 108419.193   | 0.026                      | 98.7132   |
| 31   | 11     | 20     | 31    | 10      | 21      | A    | 0           | 108441.751   | 0.003                      | 189.6117  |
| 23   | 1      | 22     | 23    | 0       | 23      | E    | 0           | 108451.215   | 0.019                      | 116.3734  |
| 23   | 2      | 22     | 23    | 1       | 23      | E    | 0           | 108451.557   | 0.027                      | 116.3734  |
| 33   | 11     | 23     | 33    | 10      | 24      | A    | 0           | 108456.139   | 0.009                      | 203.3148  |
| 23   | 1      | 22     | 23    | 0       | 23      | A    | 0           | 108470.526   | 0.061                      | 116.3618  |
| 23   | 2      | 22     | 23    | 1       | 23      | A    | 0           | 108470.881   | 0.082                      | 116.3618  |
| 31   | 11     | 20     | 31    | 10      | 21      | E    | 0           | 108475.139   | -0.062                     | 189.6180  |
| 23   | 1      | 22     | 23    | 0       | 23      | E    | 1           | 108559.422   | -0.030                     | 244.6989  |
| 23   | 2      | 22     | 23    | 1       | 23      | E    | 1           | 108559.806   | 0.008                      | 244.6989  |
| 59   | 15     | 44     | 59    | 14      | 45      | A    | 0           | 108617.025   | -0.111                     | 481.2552  |
| 16   | 4      | 13     | 15    | 3       | 12      | A    | 1           | 108633.875   | 0.023                      | 223.4777  |
| 59   | 15     | 44     | 59    | 14      | 45      | E    | 0           | 108652.482   | -0.025                     | 481.2591  |
| 16   | 4      | 13     | 15    | 3       | 12      | E    | 0           | 108980.765   | -0.033                     | 94.7880   |
| 16   | 4      | 13     | 15    | 3       | 12      | A    | 0           | 108997.493   | -0.013                     | 94.7768   |
| 18   | 4      | 15     | 17    | 4       | 14      | A    | 1           | 109265.989   | 0.001                      | 230.5648  |
| 32   | 11     | 22     | 32    | 10      | 23      | E    | 0           | 109348.847   | 0.003                      | 196.3190  |
| 38   | 10     | 29     | 38    | 9       | 30      | E    | 0           | 109351.033   | -0.004                     | 237.8873  |
| 18   | 4      | 15     | 17    | 4       | 14      | E    | 0           | 109355.951   | 0.014                      | 101.8894  |
| 18   | 4      | 15     | 17    | 4       | 14      | A    | 0           | 109358.055   | -0.001                     | 101.8789  |
| 38   | 10     | 29     | 38    | 9       | 30      | A    | 0           | 109363.977   | -0.008                     | 237.8808  |
| 32   | 11     | 22     | 32    | 10      | 23      | A    | 0           | 109441.217   | -0.002                     | 196.3134  |
| 19   | 2      | 17     | 18    | 3       | 16      | A    | 1           | 109685.819   | 0.002                      | 231.9830  |
| 19   | 2      | 17     | 18    | 3       | 16      | E    | 0           | 109762.673   | -0.006                     | 103.3014  |
| 19   | 2      | 17     | 18    | 3       | 16      | A    | 0           | 109764.444   | -0.010                     | 103.2906  |
| 39   | 11     | 29     | 39    | 10      | 30      | E    | 0           | 109816.837   | -0.028                     | 249.7840  |
| 19   | 3      | 17     | 18    | 3       | 16      | A    | 1           | 109822.862   | 0.013                      | 231.9830  |
| 39   | 11     | 29     | 39    | 10      | 30      | A    | 0           | 109841.627   | -0.006                     | 249.7781  |
| 19   | 3      | 17     | 18    | 3       | 16      | E    | 1           | 109895.756   | -0.011                     | 231.6353  |
| 19   | 3      | 17     | 18    | 3       | 16      | E    | 0           | 109906.838   | -0.002                     | 103.3014  |
| 19   | 3      | 17     | 18    | 3       | 16      | A    | 0           | 109909.024   | -0.007                     | 103.2906  |
| 19   | 2      | 17     | 18    | 2       | 16      | A    | 1           | 109938.425   | 0.008                      | 231.9746  |
| 25   | 2      | 23     | 25    | 1       | 24      | A    | 1           | 109970.559   | -0.003                     | 257.5494  |
| 25   | 3      | 23     | 25    | 2       | 24      | A    | 1           | 109973.184   | 0.001                      | 257.5494  |
| 20   | 1      | 19     | 19    | 2       | 18      | A    | 1           | 109978.238   | 0.006                      | 232.9726  |
| 20   | 2      | 19     | 19    | 2       | 18      | A    | 1           | 109980.941   | 0.015                      | 232.9726  |



| $J'$ | $K'_a$ | $K'_c$ | $J''$ | $K''_a$ | $K''_c$ | Sym. | $v_{tCH_3}$ | $\nu_{Obs.}$ | $\nu_{Obs.} - \nu_{Calc.}$ | $E_{low}$ |
|------|--------|--------|-------|---------|---------|------|-------------|--------------|----------------------------|-----------|
| 20   | 1      | 19     | 19    | 1       | 18      | A    | 1           | 109983.667   | 0.001                      | 232.9724  |
| 20   | 2      | 19     | 19    | 1       | 18      | A    | 1           | 109986.349   | -0.012                     | 232.9724  |
| 20   | 2      | 19     | 19    | 2       | 18      | E    | 1           | 110024.669   | -0.029                     | 232.6139  |
| 19   | 2      | 17     | 18    | 2       | 16      | A    | 0           | 110029.999   | -0.017                     | 103.2817  |
| 20   | 2      | 19     | 19    | 1       | 18      | E    | 1           | 110030.598   | -0.014                     | 232.6137  |
| 20   | 1      | 19     | 19    | 2       | 18      | E    | 0           | 110040.155   | -0.002                     | 104.2820  |
| 20   | 1      | 19     | 19    | 2       | 18      | A    | 0           | 110041.481   | -0.006                     | 104.2708  |
| 20   | 2      | 19     | 19    | 2       | 18      | E    | 0           | 110043.008   | -0.014                     | 104.2820  |
| 20   | 2      | 19     | 19    | 2       | 18      | A    | 0           | 110044.349   | -0.013                     | 104.2708  |
| 20   | 1      | 19     | 19    | 1       | 18      | E    | 0           | 110045.903   | -0.012                     | 104.2818  |
| 20   | 1      | 19     | 19    | 1       | 18      | A    | 0           | 110047.245   | -0.019                     | 104.2707  |
| 20   | 2      | 19     | 19    | 1       | 18      | E    | 0           | 110048.760   | -0.021                     | 104.2818  |
| 20   | 2      | 19     | 19    | 1       | 18      | A    | 0           | 110050.121   | -0.019                     | 104.2707  |
| 19   | 3      | 17     | 18    | 2       | 16      | A    | 1           | 110075.405   | -0.045                     | 231.9746  |
| 19   | 3      | 17     | 18    | 2       | 16      | E    | 1           | 110165.620   | -0.012                     | 231.6263  |
| 19   | 3      | 17     | 18    | 2       | 16      | E    | 0           | 110171.698   | 0.007                      | 103.2925  |
| 19   | 3      | 17     | 18    | 2       | 16      | A    | 0           | 110174.578   | -0.014                     | 103.2817  |
| 21   | 0      | 21     | 20    | 0       | 20      | A    | 1           | 110180.832   | 0.012                      | 233.5339  |
| 21   | 0      | 21     | 20    | 1       | 20      | A    | 1           | 110180.832   | 0.055                      | 233.5339  |
| 21   | 1      | 21     | 20    | 0       | 20      | A    | 1           | 110180.832   | -0.007                     | 233.5339  |
| 21   | 1      | 21     | 20    | 1       | 20      | A    | 1           | 110180.832   | 0.035                      | 233.5339  |
| 21   | 0      | 21     | 20    | 0       | 20      | E    | 1           | 110194.030   | -0.065                     | 233.1586  |
| 21   | 0      | 21     | 20    | 1       | 20      | E    | 1           | 110194.030   | -0.018                     | 233.1586  |
| 21   | 1      | 21     | 20    | 0       | 20      | E    | 1           | 110194.030   | -0.087                     | 233.1586  |
| 21   | 1      | 21     | 20    | 1       | 20      | E    | 1           | 110194.030   | -0.040                     | 233.1586  |
| 21   | 0      | 21     | 20    | 0       | 20      | E    | 0           | 110219.474   | -0.034                     | 104.8304  |
| 21   | 1      | 21     | 20    | 1       | 20      | E    | 0           | 110219.474   | -0.010                     | 104.8304  |
| 21   | 0      | 21     | 20    | 0       | 20      | A    | 0           | 110219.908   | -0.010                     | 104.8188  |
| 21   | 0      | 21     | 20    | 1       | 20      | A    | 0           | 110219.908   | 0.035                      | 104.8188  |
| 21   | 1      | 21     | 20    | 0       | 20      | A    | 0           | 110219.908   | -0.032                     | 104.8188  |
| 21   | 1      | 21     | 20    | 1       | 20      | A    | 0           | 110219.908   | 0.014                      | 104.8188  |
| 37   | 12     | 25     | 37    | 11      | 26      | E    | 0           | 110349.559   | -0.049                     | 237.3303  |
| 62   | 17     | 45     | 62    | 16      | 46      | E    | 0           | 110351.561   | -0.003                     | 528.8330  |
| 37   | 12     | 25     | 37    | 11      | 26      | A    | 0           | 110386.951   | 0.005                      | 237.3245  |
| 31   | 11     | 31     | 31    | 10      | 22      | E    | 0           | 110388.658   | -0.021                     | 189.5391  |
| 35   | 7      | 28     | 35    | 6       | 29      | A    | 0           | 110399.981   | -0.014                     | 207.3455  |
| 35   | 7      | 28     | 35    | 6       | 29      | E    | 0           | 110402.549   | 0.003                      | 207.3529  |
| 62   | 17     | 45     | 62    | 16      | 46      | A    | 0           | 110415.748   | -0.035                     | 528.8283  |
| 30   | 11     | 30     | 30    | 10      | 20      | A    | 0           | 110426.089   | 0.019                      | 183.0208  |
| 25   | 2      | 23     | 25    | 1       | 24      | E    | 0           | 110465.814   | 0.009                      | 128.8718  |
| 25   | 3      | 23     | 25    | 2       | 24      | E    | 0           | 110468.633   | 0.015                      | 128.8718  |
| 25   | 3      | 23     | 25    | 1       | 24      | A    | 0           | 110483.552   | 0.056                      | 128.8609  |
| 25   | 3      | 23     | 25    | 2       | 24      | A    | 0           | 110486.384   | 0.064                      | 128.8609  |
| 31   | 11     | 31     | 31    | 10      | 22      | A    | 0           | 110511.856   | -0.000                     | 189.5338  |
| 25   | 2      | 23     | 25    | 1       | 24      | E    | 1           | 110548.354   | -0.029                     | 257.1993  |
| 25   | 3      | 23     | 25    | 2       | 24      | E    | 1           | 110551.295   | -0.011                     | 257.1993  |
| 57   | 16     | 41     | 57    | 15      | 42      | E    | 0           | 110766.240   | -0.001                     | 458.9116  |
| 57   | 16     | 41     | 57    | 15      | 42      | A    | 0           | 110844.395   | 0.004                      | 458.9067  |
| 18   | 3      | 15     | 17    | 3       | 14      | A    | 1           | 111014.089   | 0.062                      | 230.4067  |
| 17   | 4      | 14     | 16    | 3       | 13      | A    | 1           | 11019.308    | 0.018                      | 226.8616  |
| 17   | 5      | 12     | 16    | 5       | 11      | A    | 0           | 111121.995   | -0.002                     | 100.5433  |
| 17   | 5      | 12     | 16    | 5       | 11      | E    | 0           | 111124.571   | 0.015                      | 100.5538  |
| 18   | 3      | 15     | 17    | 3       | 14      | E    | 0           | 111152.420   | -0.024                     | 101.7258  |
| 18   | 3      | 15     | 17    | 3       | 14      | A    | 0           | 111157.282   | -0.008                     | 101.7149  |
| 18   | 3      | 15     | 17    | 3       | 14      | E    | 1           | 111158.385   | -0.009                     | 230.0581  |
| 18   | 12     | 6      | 17    | 12      | 5       | A    | 0           | 111174.868   | 0.003                      | 126.1325  |
| 18   | 12     | 7      | 17    | 12      | 6       | A    | 0           | 111174.868   | 0.003                      | 126.1325  |
| 18   | 12     | 7      | 17    | 12      | 6       | E    | 0           | 111175.524   | 0.014                      | 126.1281  |
| 17   | 4      | 14     | 16    | 3       | 13      | E    | 0           | 111321.203   | -0.048                     | 98.1762   |
| 17   | 4      | 14     | 16    | 3       | 13      | A    | 0           | 111335.455   | -0.013                     | 98.1651   |
| 18   | 11     | 8      | 17    | 11      | 7       | A    | 0           | 111341.298   | 0.027                      | 121.7647  |
| 18   | 11     | 7      | 17    | 11      | 6       | A    | 0           | 111341.298   | 0.026                      | 121.7647  |
| 18   | 11     | 8      | 17    | 11      | 7       | E    | 0           | 111342.116   | 0.015                      | 121.7617  |
| 30   | 11     | 20     | 30    | 10      | 21      | E    | 0           | 111447.903   | 0.008                      | 182.9822  |
| 27   | 3      | 24     | 27    | 2       | 25      | A    | 1           | 111547.252   | 0.130                      | 271.1086  |
| 30   | 11     | 20     | 30    | 10      | 21      | A    | 0           | 111597.760   | 0.003                      | 182.9773  |
| 17   | 4      | 13     | 16    | 4       | 12      | E    | 0           | 111678.236   | -0.012                     | 99.3633   |
| 17   | 4      | 13     | 16    | 4       | 12      | A    | 0           | 111679.970   | -0.002                     | 99.3523   |
| 26   | 7      | 19     | 25    | 8       | 18      | E    | 0           | 111732.854   | 0.038                      | 147.0957  |
| 31   | 9      | 22     | 30    | 10      | 21      | A    | 0           | 111849.464   | -0.030                     | 182.9773  |
| 18   | 9      | 10     | 17    | 9       | 9       | A    | 0           | 111865.284   | 0.017                      | 114.1986  |
| 18   | 9      | 10     | 17    | 9       | 9       | E    | 0           | 111867.175   | 0.005                      | 114.1989  |
| 42   | 14     | 28     | 41    | 15      | 27      | A    | 0           | 111894.695   | -0.019                     | 288.5650  |
| 40   | 13     | 27     | 39    | 14      | 26      | A    | 0           | 111933.837   | -0.015                     | 266.3477  |
| 31   | 9      | 22     | 30    | 10      | 21      | E    | 0           | 111937.153   | 0.050                      | 182.9822  |
| 27   | 3      | 24     | 27    | 2       | 25      | E    | 0           | 112008.365   | 0.025                      | 142.4538  |
| 29   | 11     | 18     | 29    | 10      | 19      | A    | 0           | 112010.117   | 0.013                      | 176.6680  |
| 27   | 3      | 24     | 27    | 2       | 25      | A    | 0           | 112024.107   | 0.037                      | 142.4436  |
| 27   | 4      | 24     | 27    | 3       | 25      | E    | 0           | 112025.109   | 0.029                      | 142.4538  |
| 8    | 6      | 3      | 7     | 5       | 3       | E    | 0           | 112034.467   | -0.024                     | 77.7768   |
| 27   | 4      | 24     | 27    | 3       | 25      | A    | 0           | 112040.916   | 0.041                      | 142.4437  |
| 27   | 3      | 24     | 27    | 2       | 25      | E    | 1           | 112060.070   | -0.051                     | 270.7826  |
| 8    | 6      | 2      | 7     | 5       | 2       | E    | 0           | 112072.932   | -0.024                     | 77.7843   |
| 27   | 4      | 24     | 27    | 3       | 25      | E    | 1           | 112077.513   | -0.015                     | 270.7826  |
| 8    | 6      | 2      | 7     | 5       | 3       | A    | 0           | 112079.577   | 0.089                      | 77.7705   |
| 29   | 11     | 18     | 29    | 10      | 19      | E    | 0           | 112082.913   | -0.066                     | 176.6749  |
| 40   | 11     | 30     | 40    | 10      | 31      | A    | 0           | 112097.144   | -0.033                     | 258.2163  |
| 10   | 5      | 6      | 9     | 4       | 5       | A    | 0           | 112138.288   | 0.011                      | 79.6143   |
| 61   | 24     | 38     | 60    | 25      | 35      | A    | 0           | 112139.167   | -0.025                     | 564.2613  |
| 44   | 15     | 30     | 43    | 16      | 28      | E    | 0           | 112188.297   | -0.012                     | 311.9801  |
| 52   | 15     | 37     | 52    | 14      | 38      | E    | 0           | 112197.693   | -0.014                     | 394.7855  |
| 44   | 15     | 29     | 43    | 16      | 27      | E    | 0           | 112206.657   | 0.032                      | 311.9927  |
| 44   | 15     | 29     | 43    | 16      | 28      | A    | 0           | 112213.880   | -0.006                     | 311.9883  |
| 53   | 13     | 40     | 53    | 12      | 41      | A    | 0           | 112217.442   | -0.110                     | 399.7443  |
| 53   | 13     | 40     | 53    | 12      | 41      | E    | 0           | 112262.693   | -0.028                     | 399.7485  |
| 52   | 15     | 37     | 52    | 14      | 38      | A    | 0           | 112279.172   | 0.011                      | 394.7804  |
| 18   | 8      | 10     | 17    | 8       | 9       | E    | 0           | 112305.402   | 0.002                      | 111.0228  |
| 18   | 8      | 11     | 17    | 8       | 10      | E    | 0           | 112306.294   | 0.000                      | 111.0121  |
| 18   | 8      | 10     | 17    | 8       | 9       | A    | 0           | 112313.681   | -0.021                     | 111.0103  |
| 67   | 18     | 49     | 67    | 17      | 50      | E    | 0           | 112407.372   | -0.017                     | 604.5127  |
| 18   | 5      | 14     | 17    | 5       | 13      | E    | 0           | 112427.525   | -0.019                     | 103.8221  |
| 18   | 5      | 14     | 17    | 5       | 13      | A    | 0           | 112428.102   | 0.000                      | 103.8120  |
| 29   | 11     | 19     | 29    | 10      | 20      | E    | 0           | 112490.091   | -0.011                     | 176.6487  |
| 33   | 6      | 27     | 33    | 5       | 28      | E    | 1           | 112523.434   | -0.125                     | 317.8988  |
| 33   | 6      | 27     | 33    | 5       | 28      | E    | 0           | 112626.677   | 0.013                      | 189.5723  |
| 33   | 6      | 27     | 33    | 5       | 28      | A    | 0           | 112631.786   | 0.013                      | 189.5643  |
| 38   | 12     | 26     | 37    | 13      | 25      | A    | 0           | 112645.582   | -0.020                     | 245.3368  |
| 29   | 11     | 19     | 29    | 10      | 20      | A    | 0           | 112648.760   | 0.003                      | 176.6445  |
| 46   | 16     | 31     | 45    | 17      | 28      | A    | 0           | 112685.487   | -0.031                     | 336.6169  |
| 46   | 16     | 31     | 45    | 17      | 29      | E    | 0           | 112757.409   | -0.002                     | 336.6076  |
| 46   | 16     | 30     | 45    | 17      | 28      | E    | 0           | 112763.709   | 0.013                      | 336.6198  |
| 19   | 3      | 16     | 18    | 4       | 15      | E    | 1           | 112765.292   | -0.076                     | 233.8709  |
| 42   | 13     | 29     | 42    | 12      | 30      | E    | 0           | 112775.743   | -0.048                     | 283.9968  |
| 19   | 3      | 16     | 18    | 4       | 15      | A    | 0           | 112793.865   | -0.022                     | 105.5267  |
| 19   | 3      | 16     | 18    | 4       | 15      | E    | 0           | 112795.990   | -0.004                     | 105.5372  |
| 42   | 13     | 29     | 42    | 12      | 30      | A    | 0           | 112836.098   | -0.003                     | 283.9914  |



| $J'$ | $K'_a$ | $K'_c$ | $J''$ | $K''_a$ | $K''_c$ | Sym. | $v_{tCH_3}$ | $\nu_{Obs.}$ | $\nu_{Obs.} - \nu_{Calc.}$ | $E_{low}$ |
|------|--------|--------|-------|---------|---------|------|-------------|--------------|----------------------------|-----------|
| 18   | 7      | 12     | 17    | 7       | 11      | A    | 0           | 112876.723   | -0.002                     | 108.2286  |
| 18   | 7      | 12     | 17    | 7       | 11      | E    | 0           | 112910.446   | 0.004                      | 108.2346  |
| 29   | 4      | 25     | 29    | 3       | 26      | E    | 0           | 113002.852   | 0.025                      | 157.1068  |
| 29   | 4      | 25     | 29    | 3       | 26      | A    | 0           | 113016.110   | 0.027                      | 157.0974  |
| 29   | 4      | 25     | 29    | 3       | 26      | E    | 1           | 113016.928   | -0.058                     | 285.4359  |
| 10   | 5      | 5      | 9     | 4       | 6       | A    | 0           | 113021.122   | 0.018                      | 79.5886   |
| 1    | 1      | 1      | 0     | 0       | 0       | A    | 1           | 113033.654   | 0.109                      | 195.9825  |
| 37   | 9      | 29     | 37    | 8       | 30      | E    | 0           | 113036.034   | -0.009                     | 226.1773  |
| 37   | 9      | 29     | 37    | 8       | 30      | A    | 0           | 113043.172   | -0.019                     | 226.1705  |
| 18   | 7      | 11     | 17    | 7       | 10      | E    | 0           | 113079.472   | 0.052                      | 108.2462  |
| 29   | 5      | 25     | 29    | 4       | 26      | E    | 0           | 113081.221   | 0.015                      | 157.1069  |
| 29   | 5      | 25     | 29    | 4       | 26      | A    | 0           | 113094.795   | 0.029                      | 157.0975  |
| 29   | 5      | 25     | 29    | 4       | 26      | E    | 1           | 113098.433   | -0.070                     | 285.4361  |
| 18   | 7      | 11     | 17    | 7       | 10      | A    | 0           | 113110.384   | 0.015                      | 108.2353  |
| 38   | 8      | 30     | 38    | 7       | 31      | A    | 0           | 113190.194   | -0.040                     | 233.9177  |
| 38   | 8      | 30     | 38    | 7       | 31      | E    | 0           | 113199.547   | -0.015                     | 233.9244  |
| 47   | 14     | 33     | 47    | 13      | 34      | E    | 0           | 113221.071   | -0.060                     | 336.4783  |
| 35   | 8      | 28     | 35    | 7       | 29      | E    | 1           | 113225.830   | -0.095                     | 335.6893  |
| 31   | 5      | 26     | 31    | 4       | 27      | E    | 1           | 113271.229   | -0.106                     | 301.1462  |
| 18   | 6      | 13     | 17    | 6       | 12      | A    | 0           | 113293.888   | -0.012                     | 105.8545  |
| 31   | 5      | 26     | 31    | 4       | 27      | E    | 0           | 113305.759   | 0.031                      | 172.8178  |
| 31   | 5      | 26     | 31    | 4       | 27      | A    | 0           | 113315.688   | 0.004                      | 172.8091  |
| 35   | 8      | 28     | 35    | 7       | 29      | E    | 0           | 113330.005   | -0.017                     | 207.3659  |
| 35   | 8      | 28     | 35    | 7       | 29      | A    | 0           | 113337.063   | -0.026                     | 207.3585  |
| 39   | 10     | 30     | 39    | 9       | 31      | E    | 0           | 113352.221   | -0.032                     | 246.0030  |
| 28   | 11     | 17     | 28    | 10      | 18      | E    | 0           | 113357.966   | -0.068                     | 170.5553  |
| 39   | 10     | 30     | 39    | 9       | 31      | A    | 0           | 113362.162   | -0.042                     | 245.9967  |
| 24   | 1      | 23     | 24    | 0       | 24      | E    | 0           | 113398.042   | 0.086                      | 120.5633  |
| 24   | 2      | 23     | 24    | 1       | 24      | E    | 0           | 113398.042   | -0.076                     | 120.5633  |
| 24   | 1      | 23     | 24    | 0       | 24      | A    | 0           | 113418.271   | 0.129                      | 120.5517  |
| 24   | 2      | 23     | 24    | 1       | 24      | A    | 0           | 113418.271   | -0.033                     | 120.5517  |
| 28   | 11     | 18     | 28    | 10      | 19      | E    | 0           | 113487.967   | -0.023                     | 170.5384  |
| 1    | 1      | 1      | 0     | 0       | 0       | E    | 0           | 11355.741    | -0.037                     | 67.2623   |
| 33   | 7      | 27     | 33    | 6       | 28      | E    | 1           | 113577.674   | -0.122                     | 317.9025  |
| 1    | 1      | 1      | 0     | 0       | 0       | A    | 0           | 11358.701    | -0.024                     | 67.2503   |
| 31   | 6      | 26     | 31    | 5       | 27      | E    | 1           | 113588.292   | -0.097                     | 301.1471  |
| 35   | 10     | 26     | 34    | 11      | 23      | E    | 0           | 113608.308   | -0.004                     | 214.1886  |
| 31   | 6      | 26     | 31    | 5       | 27      | E    | 0           | 113610.705   | -0.004                     | 172.8186  |
| 11   | 4      | 7      | 10    | 3       | 8       | E    | 0           | 113617.352   | -0.014                     | 80.2867   |
| 31   | 6      | 26     | 31    | 5       | 27      | A    | 0           | 113621.808   | 0.004                      | 172.8099  |
| 11   | 4      | 7      | 10    | 3       | 8       | A    | 0           | 113626.023   | -0.011                     | 80.2755   |
| 28   | 11     | 18     | 28    | 10      | 19      | A    | 0           | 113632.884   | -0.015                     | 170.5353  |
| 33   | 7      | 27     | 33    | 6       | 28      | E    | 0           | 113642.007   | -0.009                     | 189.5759  |
| 33   | 7      | 27     | 33    | 6       | 28      | A    | 0           | 113650.716   | -0.013                     | 189.5678  |
| 18   | 4      | 15     | 17    | 3       | 14      | A    | 1           | 114007.589   | 0.013                      | 230.4067  |
| 36   | 12     | 24     | 36    | 11      | 25      | E    | 0           | 114009.445   | -0.077                     | 229.3605  |
| 36   | 12     | 24     | 36    | 11      | 25      | A    | 0           | 114024.573   | -0.014                     | 229.3550  |
| 50   | 18     | 38     | 50    | 11      | 39      | E    | 0           | 114145.509   | -0.042                     | 362.2232  |
| 50   | 18     | 38     | 49    | 19      | 39      | E    | 0           | 114148.376   | -0.056                     | 389.4770  |
| 65   | 26     | 39     | 64    | 27      | 38      | A    | 0           | 114178.075   | -0.118                     | 635.5534  |
| 65   | 26     | 40     | 64    | 27      | 37      | A    | 0           | 114178.075   | -0.118                     | 635.5534  |
| 18   | 4      | 15     | 17    | 3       | 14      | E    | 0           | 114262.815   | -0.047                     | 101.7258  |
| 18   | 4      | 15     | 17    | 3       | 14      | A    | 0           | 114274.398   | -0.036                     | 101.7149  |
| 18   | 4      | 15     | 17    | 3       | 14      | E    | 1           | 114304.743   | 0.050                      | 230.0581  |
| 27   | 11     | 16     | 27    | 10      | 17      | A    | 0           | 114363.211   | -0.003                     | 164.6549  |
| 27   | 11     | 16     | 27    | 10      | 17      | E    | 0           | 114396.283   | -0.077                     | 164.6639  |
| 27   | 11     | 17     | 27    | 10      | 18      | E    | 0           | 114416.525   | -0.039                     | 164.6506  |
| 27   | 11     | 17     | 27    | 10      | 18      | A    | 0           | 114532.880   | -0.019                     | 164.6488  |
| 36   | 11     | 25     | 35    | 12      | 24      | A    | 0           | 114606.554   | -0.053                     | 225.5321  |
| 19   | 4      | 16     | 18    | 4       | 15      | E    | 1           | 114694.898   | -0.040                     | 233.8709  |
| 19   | 4      | 16     | 18    | 4       | 15      | E    | 0           | 114696.520   | -0.037                     | 105.5372  |
| 19   | 4      | 16     | 18    | 4       | 15      | A    | 0           | 114699.032   | 0.042                      | 105.5267  |
| 20   | 2      | 18     | 19    | 3       | 17      | A    | 1           | 114883.871   | -0.010                     | 235.6463  |
| 26   | 2      | 24     | 26    | 1       | 25      | A    | 1           | 114925.835   | -0.024                     | 262.2441  |
| 26   | 3      | 24     | 26    | 2       | 25      | A    | 1           | 114927.169   | -0.010                     | 262.2441  |
| 52   | 19     | 34     | 51    | 20      | 32      | E    | 0           | 114939.342   | 0.095                      | 417.7181  |
| 20   | 3      | 18     | 19    | 3       | 17      | A    | 1           | 114957.093   | -0.011                     | 235.6463  |
| 20   | 2      | 18     | 19    | 3       | 17      | E    | 0           | 114965.561   | -0.027                     | 106.9675  |
| 20   | 2      | 18     | 19    | 3       | 17      | A    | 0           | 114967.547   | -0.022                     | 106.9567  |
| 41   | 9      | 32     | 41    | 8       | 33      | A    | 0           | 114991.886   | -0.056                     | 262.7008  |
| 41   | 11     | 31     | 41    | 10      | 32      | E    | 0           | 115003.153   | -0.008                     | 266.8439  |
| 41   | 9      | 32     | 41    | 8       | 33      | E    | 0           | 115009.418   | 0.008                      | 262.7068  |
| 41   | 11     | 31     | 41    | 10      | 32      | A    | 0           | 115019.053   | -0.025                     | 266.8383  |
| 20   | 2      | 18     | 19    | 2       | 17      | A    | 1           | 115020.932   | 0.018                      | 235.6418  |
| 20   | 3      | 18     | 19    | 3       | 17      | E    | 1           | 115030.277   | -0.045                     | 235.3010  |
| 20   | 3      | 18     | 19    | 3       | 17      | E    | 0           | 115042.870   | -0.009                     | 106.9675  |
| 20   | 3      | 18     | 19    | 3       | 17      | A    | 0           | 115045.090   | -0.007                     | 106.9567  |
| 20   | 3      | 18     | 19    | 2       | 17      | A    | 1           | 115094.150   | 0.014                      | 235.6418  |
| 21   | 1      | 20     | 20    | 2       | 19      | A    | 1           | 115106.707   | 0.011                      | 236.6412  |
| 21   | 2      | 20     | 20    | 2       | 19      | A    | 1           | 115108.013   | -0.009                     | 236.6412  |
| 21   | 1      | 20     | 20    | 1       | 19      | A    | 1           | 115109.336   | -0.054                     | 236.6411  |
| 20   | 2      | 18     | 19    | 2       | 17      | E    | 0           | 115109.764   | 0.015                      | 106.9627  |
| 21   | 2      | 20     | 20    | 1       | 19      | A    | 1           | 115110.728   | 0.012                      | 236.6411  |
| 20   | 2      | 18     | 19    | 2       | 17      | A    | 0           | 115112.136   | -0.010                     | 106.9519  |
| 21   | 1      | 20     | 20    | 2       | 19      | E    | 1           | 115150.114   | -0.024                     | 236.2839  |
| 21   | 2      | 20     | 20    | 2       | 19      | E    | 1           | 115151.577   | -0.023                     | 236.2839  |
| 21   | 1      | 20     | 20    | 2       | 19      | E    | 0           | 115169.932   | 0.005                      | 107.9526  |
| 21   | 1      | 20     | 20    | 2       | 19      | A    | 0           | 115171.273   | 0.016                      | 107.9415  |
| 21   | 2      | 20     | 20    | 2       | 19      | E    | 0           | 115171.273   | -0.069                     | 107.9526  |
| 21   | 2      | 20     | 20    | 2       | 19      | A    | 0           | 115172.727   | 0.049                      | 107.9415  |
| 21   | 1      | 20     | 20    | 1       | 19      | E    | 0           | 115172.727   | -0.067                     | 107.9525  |
| 21   | 1      | 20     | 20    | 1       | 19      | A    | 0           | 115174.179   | 0.046                      | 107.9414  |
| 21   | 2      | 20     | 20    | 1       | 19      | E    | 0           | 115174.179   | -0.029                     | 107.9525  |
| 21   | 2      | 20     | 20    | 1       | 19      | A    | 0           | 115175.547   | -0.006                     | 107.9414  |
| 20   | 3      | 18     | 19    | 2       | 17      | E    | 0           | 115187.029   | -0.011                     | 106.9627  |
| 20   | 3      | 18     | 19    | 2       | 17      | A    | 0           | 115189.670   | -0.004                     | 106.9519  |
| 26   | 11     | 16     | 26    | 10      | 17      | E    | 0           | 115253.488   | 0.000                      | 158.9848  |
| 20   | 4      | 16     | 19    | 5       | 15      | A    | 0           | 115256.416   | -0.005                     | 111.5077  |
| 26   | 11     | 15     | 26    | 10      | 16      | A    | 0           | 115259.549   | 0.031                      | 158.9871  |
| 26   | 11     | 15     | 26    | 10      | 16      | E    | 0           | 115265.875   | -0.048                     | 158.9971  |
| 20   | 4      | 16     | 19    | 5       | 15      | E    | 0           | 115271.579   | 0.030                      | 111.5177  |
| 22   | 0      | 22     | 21    | 0       | 21      | A    | 1           | 115309.882   | 0.024                      | 237.2091  |
| 22   | 0      | 22     | 21    | 1       | 21      | A    | 1           | 115309.882   | 0.044                      | 237.2091  |
| 22   | 1      | 22     | 21    | 0       | 21      | A    | 1           | 115309.882   | 0.015                      | 237.2091  |
| 22   | 1      | 22     | 21    | 1       | 21      | A    | 1           | 115309.882   | 0.035                      | 237.2091  |
| 22   | 0      | 22     | 21    | 0       | 21      | E    | 1           | 115322.983   | -0.038                     | 236.8343  |
| 22   | 0      | 22     | 21    | 1       | 21      | E    | 1           | 115322.983   | -0.016                     | 236.8343  |
| 22   | 1      | 22     | 21    | 0       | 21      | E    | 1           | 115322.983   | -0.048                     | 236.8343  |
| 22   | 1      | 22     | 21    | 1       | 21      | E    | 1           | 115322.983   | -0.026                     | 236.8343  |
| 26   | 11     | 16     | 26    | 10      | 17      | A    | 0           | 115342.117   | -0.000                     | 158.9842  |
| 22   | 0      | 22     | 21    | 0       | 21      | E    | 0           | 115349.753   | -0.043                     | 108.5069  |
| 22   | 0      | 22     | 21    | 1       | 21      | E    | 0           | 115349.753   | -0.022                     | 108.5069  |
| 22   | 1      | 22     | 21    | 0       | 21      | E    | 0           | 115349.753   | -0.053                     | 108.5069  |
| 22   | 1      | 22     | 21    | 1       | 21      | E    | 0           | 115349.753   | -0.032                     | 108.5069  |
| 22   | 0      | 22     | 21    | 0       | 21      | A    | 0           | 115350.207   | 0.004                      | 108.4953  |
| 22   | 0      | 22     | 21    | 1       | 21      | A    | 0           | 115350.207   | 0.025                      | 108.4953  |



| $J'$ | $K'_a$ | $K'_c$ | $J''$ | $K''_a$ | $K''_c$ | Sym. | $v_{tCH_3}$ | $\nu_{Obs.}$ | $\nu_{Obs.} - \nu_{Calc.}$ | $E_{low}$ |
|------|--------|--------|-------|---------|---------|------|-------------|--------------|----------------------------|-----------|
| 22   | 1      | 22     | 21    | 0       | 21      | A    | 0           | 115350.207   | -0.006                     | 108.4953  |
| 22   | 1      | 22     | 21    | 1       | 21      | A    | 0           | 115350.207   | 0.016                      | 108.4953  |
| 26   | 2      | 24     | 26    | 1       | 25      | E    | 0           | 115444.929   | 0.023                      | 133.5689  |
| 26   | 3      | 24     | 26    | 2       | 25      | E    | 0           | 115446.364   | 0.035                      | 133.5689  |
| 26   | 2      | 24     | 26    | 1       | 25      | A    | 0           | 115463.553   | 0.067                      | 133.5581  |
| 26   | 3      | 24     | 26    | 2       | 25      | A    | 0           | 115464.977   | 0.061                      | 133.5581  |
| 26   | 2      | 24     | 26    | 1       | 25      | E    | 1           | 115532.700   | -0.022                     | 261.8955  |
| 26   | 3      | 24     | 26    | 2       | 25      | E    | 1           | 115534.199   | -0.005                     | 261.8955  |
| 40   | 12     | 29     | 40    | 11      | 30      | E    | 0           | 115614.902   | -0.024                     | 261.9606  |
| 40   | 12     | 29     | 40    | 11      | 30      | A    | 0           | 115654.976   | -0.012                     | 261.9555  |
| 44   | 10     | 34     | 44    | 9       | 35      | A    | 0           | 115719.698   | -0.061                     | 293.6856  |
| 44   | 10     | 34     | 44    | 9       | 35      | E    | 0           | 115746.198   | -0.006                     | 293.6910  |
| 39   | 12     | 28     | 39    | 11      | 29      | E    | 0           | 115761.703   | -0.023                     | 253.4471  |
| 19   | 3      | 16     | 18    | 3       | 15      | A    | 1           | 115771.274   | 0.012                      | 234.1097  |
| 19   | 3      | 16     | 18    | 3       | 15      | E    | 0           | 115906.408   | -0.003                     | 105.4334  |
| 19   | 3      | 16     | 18    | 3       | 15      | A    | 0           | 115911.026   | -0.006                     | 105.4227  |
| 19   | 3      | 16     | 18    | 3       | 15      | E    | 1           | 115911.661   | -0.006                     | 233.7660  |
| 61   | 17     | 44     | 61    | 16      | 45      | E    | 0           | 115937.813   | 0.001                      | 515.0628  |
| 25   | 11     | 14     | 25    | 10      | 15      | E    | 0           | 116010.775   | -0.044                     | 153.5522  |
| 61   | 17     | 44     | 61    | 16      | 45      | A    | 0           | 116017.080   | -0.018                     | 515.0583  |
| 25   | 11     | 14     | 25    | 10      | 15      | A    | 0           | 116022.335   | 0.045                      | 153.5415  |
| 41   | 12     | 30     | 41    | 11      | 31      | A    | 0           | 116025.978   | -0.021                     | 270.6749  |
| 25   | 11     | 15     | 25    | 10      | 16      | A    | 0           | 116060.909   | -0.004                     | 153.5402  |
| 69   | 28     | 41     | 68    | 29      | 40      | A    | 0           | 116264.395   | 0.003                      | 711.6502  |
| 69   | 28     | 42     | 68    | 29      | 39      | A    | 0           | 116264.395   | 0.003                      | 711.6502  |
| 38   | 12     | 27     | 38    | 11      | 28      | E    | 0           | 116326.078   | -0.016                     | 245.1450  |
| 38   | 12     | 27     | 38    | 11      | 28      | A    | 0           | 116379.948   | -0.001                     | 245.1400  |
| 28   | 3      | 25     | 28    | 2       | 26      | A    | 1           | 116563.440   | 0.131                      | 276.3104  |
| 36   | 7      | 29     | 36    | 6       | 30      | E    | 1           | 116565.295   | -0.139                     | 342.9354  |
| 28   | 4      | 25     | 28    | 3       | 26      | A    | 1           | 116571.630   | 0.122                      | 276.3104  |
| 24   | 11     | 14     | 24    | 10      | 15      | E    | 0           | 116634.314   | 0.004                      | 148.3149  |
| 56   | 21     | 36     | 55    | 22      | 34      | E    | 0           | 116653.213   | 0.021                      | 477.8108  |
| 24   | 11     | 13     | 24    | 10      | 14      | E    | 0           | 116655.101   | -0.041                     | 148.3271  |
| 24   | 11     | 13     | 24    | 10      | 14      | A    | 0           | 116676.501   | 0.059                      | 148.3161  |
| 56   | 21     | 35     | 55    | 22      | 33      | E    | 0           | 116684.433   | 0.020                      | 477.8188  |
| 24   | 11     | 14     | 24    | 10      | 15      | A    | 0           | 116693.732   | -0.019                     | 148.3155  |
| 37   | 11     | 27     | 36    | 12      | 24      | E    | 0           | 116787.147   | 0.043                      | 233.1634  |
| 35   | 12     | 23     | 35    | 11      | 24      | A    | 0           | 116924.892   | 0.013                      | 221.6441  |
| 35   | 12     | 23     | 35    | 11      | 24      | E    | 0           | 116940.661   | -0.058                     | 221.6495  |
| 42   | 12     | 31     | 42    | 11      | 32      | E    | 0           | 116977.367   | -0.018                     | 279.5995  |
| 42   | 12     | 31     | 42    | 11      | 32      | A    | 0           | 117006.965   | -0.021                     | 279.5944  |
| 28   | 3      | 25     | 28    | 2       | 26      | E    | 0           | 117048.256   | 0.030                      | 147.6588  |
| 28   | 4      | 25     | 28    | 3       | 26      | E    | 0           | 117057.074   | 0.031                      | 147.6588  |
| 28   | 3      | 25     | 28    | 3       | 26      | A    | 0           | 117064.911   | 0.059                      | 147.6487  |
| 28   | 4      | 25     | 28    | 3       | 26      | A    | 0           | 117073.759   | 0.052                      | 147.6487  |
| 28   | 3      | 25     | 28    | 2       | 26      | E    | 1           | 117105.498   | -0.039                     | 275.9867  |
| 28   | 4      | 25     | 28    | 3       | 26      | E    | 1           | 117114.603   | -0.040                     | 275.9868  |
| 24   | 6      | 18     | 23    | 7       | 17      | A    | 0           | 117135.436   | -0.014                     | 154.0836  |
| 23   | 11     | 13     | 23    | 10      | 14      | E    | 0           | 117193.150   | 0.002                      | 143.3080  |
| 12   | 26     | 37     | 11    | 27      | 13      | E    | 0           | 117194.589   | -0.011                     | 237.0590  |
| 23   | 11     | 12     | 23    | 10      | 13      | E    | 0           | 117213.542   | -0.049                     | 143.3203  |
| 23   | 11     | 12     | 23    | 10      | 13      | A    | 0           | 117239.804   | 0.058                      | 143.3092  |
| 23   | 11     | 13     | 23    | 10      | 14      | A    | 0           | 117247.128   | -0.031                     | 143.3089  |
| 37   | 12     | 26     | 37    | 11      | 27      | A    | 0           | 117260.139   | -0.003                     | 237.0542  |
| 19   | 13     | 7      | 18    | 13      | 6       | A    | 0           | 117302.298   | -0.007                     | 134.5911  |
| 19   | 13     | 6      | 18    | 13      | 5       | A    | 0           | 117302.298   | -0.007                     | 134.5911  |
| 19   | 13     | 7      | 18    | 13      | 6       | E    | 0           | 117302.908   | -0.000                     | 134.5852  |
| 18   | 4      | 14     | 17    | 4       | 13      | A    | 1           | 117329.521   | 0.026                      | 231.7690  |
| 7    | 7      | 1      | 6     | 6       | 1       | E    | 0           | 117335.077   | -0.001                     | 78.4299   |
| 7    | 7      | 0      | 6     | 6       | 0       | E    | 0           | 117369.891   | -0.023                     | 78.4387   |
| 11   | 5      | 7      | 10    | 4       | 6       | E    | 0           | 117377.605   | -0.036                     | 81.7342   |
| 7    | 7      | 0      | 6     | 6       | 1       | A    | 0           | 117380.563   | 0.024                      | 78.4251   |
| 18   | 4      | 14     | 17    | 4       | 13      | E    | 1           | 117400.486   | -0.003                     | 231.4202  |
| 4    | 1      | 3      | 3     | 2       | 2       | A    | 0           | 117444.432   | -0.056                     | 69.2386   |
| 11   | 5      | 7      | 10    | 4       | 6       | A    | 0           | 117440.448   | 0.017                      | 81.7233   |
| 18   | 4      | 14     | 17    | 4       | 13      | E    | 0           | 117451.618   | 0.013                      | 103.0885  |
| 19   | 12     | 7      | 18    | 12      | 6       | A    | 0           | 117454.224   | -0.010                     | 129.8409  |
| 19   | 12     | 8      | 18    | 12      | 7       | A    | 0           | 117454.224   | -0.010                     | 129.8409  |
| 18   | 4      | 14     | 17    | 4       | 13      | A    | 0           | 117454.837   | 0.027                      | 103.0775  |
| 4    | 1      | 3      | 3     | 2       | 2       | E    | 0           | 11754.971    | -0.018                     | 69.2501   |
| 58   | 22     | 37     | 57    | 23      | 34      | A    | 0           | 117545.522   | 0.012                      | 509.6741  |
| 19   | 4      | 16     | 18    | 3       | 15      | A    | 1           | 117593.453   | 0.037                      | 234.1097  |
| 19   | 11     | 9      | 18    | 11      | 8       | E    | 0           | 117651.657   | 0.047                      | 125.4757  |
| 22   | 11     | 12     | 22    | 10      | 13      | E    | 0           | 117677.154   | 0.007                      | 138.5181  |
| 56   | 16     | 40     | 56    | 15      | 41      | E    | 0           | 117680.369   | -0.007                     | 446.2810  |
| 22   | 11     | 11     | 22    | 10      | 12      | E    | 0           | 117696.964   | -0.042                     | 138.5304  |
| 22   | 11     | 11     | 22    | 10      | 12      | A    | 0           | 117725.503   | 0.099                      | 138.5193  |
| 22   | 11     | 12     | 22    | 10      | 13      | A    | 0           | 117728.388   | -0.039                     | 138.5192  |
| 41   | 13     | 28     | 41    | 12      | 29      | E    | 0           | 117748.136   | -0.049                     | 274.8726  |
| 25   | 1      | 24     | 25    | 0       | 25      | A    | 1           | 117771.998   | -0.118                     | 253.6209  |
| 25   | 2      | 24     | 25    | 1       | 25      | A    | 1           | 117771.998   | -0.190                     | 253.6209  |
| 41   | 13     | 28     | 41    | 12      | 29      | A    | 0           | 117795.511   | -0.001                     | 274.8677  |
| 19   | 4      | 16     | 18    | 3       | 15      | E    | 0           | 117806.959   | -0.014                     | 105.4334  |
| 19   | 4      | 16     | 18    | 3       | 15      | A    | 0           | 117816.129   | -0.005                     | 105.4227  |
| 40   | 10     | 31     | 40    | 9       | 32      | E    | 0           | 117817.810   | -0.004                     | 254.2921  |
| 19   | 4      | 16     | 18    | 3       | 15      | E    | 1           | 117841.276   | 0.039                      | 233.7660  |
| 60   | 15     | 45     | 60    | 14      | 46      | E    | 0           | 117877.286   | -0.018                     | 494.2399  |
| 38   | 9      | 30     | 38    | 8       | 31      | E    | 0           | 118051.584   | 0.003                      | 233.9495  |
| 38   | 9      | 30     | 38    | 8       | 31      | A    | 0           | 118057.743   | -0.010                     | 233.9429  |
| 21   | 11     | 11     | 21    | 10      | 12      | E    | 0           | 118094.985   | 0.008                      | 133.9440  |
| 21   | 11     | 10     | 21    | 10      | 11      | E    | 0           | 118114.252   | -0.041                     | 133.9564  |
| 30   | 4      | 26     | 30    | 3       | 27      | E    | 0           | 118147.584   | 0.026                      | 162.8211  |
| 9    | 6      | 4      | 8     | 5       | 4       | E    | 0           | 118152.193   | -0.006                     | 79.4274   |
| 30   | 4      | 26     | 30    | 3       | 27      | A    | 0           | 118161.840   | 0.043                      | 162.8118  |
| 30   | 4      | 26     | 30    | 3       | 27      | E    | 1           | 118168.257   | -0.068                     | 291.1495  |
| 9    | 6      | 4      | 8     | 5       | 3       | A    | 0           | 118189.682   | -0.027                     | 79.4213   |
| 30   | 5      | 26     | 30    | 4       | 27      | E    | 0           | 118190.561   | 0.026                      | 162.8212  |
| 9    | 6      | 3      | 8     | 5       | 4       | A    | 0           | 118201.877   | 0.072                      | 79.4209   |
| 30   | 5      | 26     | 30    | 4       | 27      | A    | 0           | 118204.990   | 0.042                      | 162.8119  |
| 30   | 5      | 26     | 30    | 4       | 27      | E    | 1           | 118213.086   | -0.068                     | 291.1496  |
| 34   | 6      | 28     | 34    | 5       | 29      | E    | 1           | 118220.583   | -0.112                     | 324.6385  |
| 36   | 12     | 25     | 36    | 11      | 26      | E    | 0           | 118256.922   | -0.006                     | 229.1930  |
| 19   | 9      | 11     | 18    | 9       | 10      | A    | 0           | 118271.725   | 0.027                      | 117.9300  |
| 19   | 9      | 10     | 18    | 9       | 9       | E    | 0           | 118273.074   | 0.007                      | 117.9421  |
| 19   | 9      | 10     | 18    | 9       | 9       | A    | 0           | 118274.070   | -0.032                     | 117.9301  |
| 19   | 9      | 11     | 18    | 9       | 10      | E    | 0           | 118274.604   | -0.007                     | 117.9304  |
| 19   | 5      | 15     | 18    | 5       | 14      | E    | 0           | 118281.586   | 0.000                      | 107.5722  |
| 19   | 5      | 15     | 18    | 5       | 14      | A    | 0           | 118282.750   | -0.000                     | 107.5622  |
| 34   | 6      | 28     | 34    | 5       | 29      | E    | 0           | 118305.778   | 0.016                      | 196.3127  |
| 34   | 6      | 28     | 34    | 5       | 29      | A    | 0           | 118312.791   | 0.020                      | 196.3048  |
| 36   | 12     | 25     | 36    | 11      | 26      | A    | 0           | 118341.312   | 0.003                      | 229.1883  |
| 25   | 1      | 24     | 25    | 0       | 25      | A    | 0           | 118364.438   | 0.119                      | 124.9127  |
| 25   | 2      | 24     | 25    | 1       | 25      | A    | 0           | 118364.438   | 0.041                      | 124.9127  |
| 18   | 5      | 13     | 17    | 5       | 12      | A    | 0           | 118422.218   | -0.002                     | 104.2499  |
| 18   | 5      | 13     | 17    | 5       | 12      | E    | 0           | 118424.277   | 0.006                      | 104.2605  |
| 20   | 11     | 10     | 20    | 10      | 11      | E    | 0           | 118454.266   | 0.006                      | 129.5845  |



| $J'$ | $K'_a$ | $K'_c$ | $J''$ | $K''_a$ | $K''_c$ | Sym. | $v_{tCH_3}$ | $\nu_{Obs.}$ | $\nu_{Obs.} - \nu_{Calc.}$ | $E_{low}$ |
|------|--------|--------|-------|---------|---------|------|-------------|--------------|----------------------------|-----------|
| 25   | 1      | 24     | 25    | 0       | 25      | E    | 1           | 118462.477   | 0.058                      | 253.2478  |
| 25   | 2      | 24     | 25    | 1       | 25      | E    | 1           | 118462.477   | -0.024                     | 253.2478  |
| 20   | 11     | 9      | 20    | 10      | 10      | E    | 0           | 118473.044   | -0.059                     | 129.5969  |
| 60   | 23     | 38     | 59    | 24      | 35      | A    | 0           | 118485.846   | -0.004                     | 542.7276  |
| 60   | 23     | 38     | 59    | 24      | 36      | E    | 0           | 118495.590   | 0.069                      | 542.7153  |
| 20   | 11     | 10     | 20    | 10      | 11      | A    | 0           | 118503.161   | -0.186                     | 129.5857  |
| 42   | 11     | 32     | 42    | 10      | 33      | E    | 0           | 118552.995   | -0.014                     | 275.6450  |
| 42   | 11     | 32     | 42    | 10      | 33      | A    | 0           | 118565.061   | -0.031                     | 275.6395  |
| 36   | 8      | 29     | 36    | 7       | 30      | E    | 0           | 118575.595   | 0.008                      | 214.6205  |
| 36   | 8      | 29     | 36    | 7       | 30      | A    | 0           | 118582.668   | -0.016                     | 214.6133  |
| 32   | 5      | 27     | 32    | 4       | 28      | E    | 1           | 118611.761   | -0.093                     | 307.3713  |
| 43   | 12     | 32     | 43    | 11      | 33      | E    | 0           | 118631.343   | -0.016                     | 288.7130  |
| 32   | 5      | 27     | 32    | 4       | 28      | E    | 0           | 118636.301   | 0.019                      | 179.0435  |
| 29   | 8      | 21     | 28    | 9       | 20      | A    | 0           | 118647.504   | -0.466                     | 167.1879  |
| 32   | 5      | 27     | 32    | 4       | 28      | A    | 0           | 118647.504   | 0.019                      | 179.0349  |
| 43   | 12     | 32     | 43    | 11      | 33      | A    | 0           | 118655.885   | -0.029                     | 288.7080  |
| 29   | 8      | 21     | 28    | 9       | 20      | E    | 0           | 118720.868   | 0.066                      | 167.1944  |
| 34   | 10     | 24     | 33    | 11      | 23      | E    | 0           | 118723.309   | 0.029                      | 206.9360  |
| 19   | 11     | 9      | 19    | 10      | 10      | E    | 0           | 118761.722   | 0.015                      | 125.4387  |
| 19   | 8      | 12     | 18    | 8       | 11      | A    | 0           | 118779.532   | -0.011                     | 114.7557  |
| 19   | 11     | 8      | 19    | 10      | 9       | E    | 0           | 118780.043   | -0.107                     | 125.4511  |
| 32   | 6      | 27     | 32    | 5       | 28      | E    | 1           | 118793.437   | -0.082                     | 307.3717  |
| 19   | 8      | 12     | 18    | 8       | 11      | E    | 0           | 118799.007   | -0.004                     | 114.7582  |
| 19   | 8      | 11     | 18    | 8       | 10      | E    | 0           | 118802.772   | -0.005                     | 114.7689  |
| 19   | 8      | 11     | 18    | 8       | 10      | A    | 0           | 118819.825   | -0.010                     | 114.7567  |
| 32   | 6      | 27     | 32    | 5       | 28      | A    | 0           | 118822.417   | 0.033                      | 179.0354  |
| 20   | 3      | 17     | 19    | 4       | 16      | A    | 0           | 118831.911   | 0.010                      | 109.3526  |
| 20   | 3      | 17     | 19    | 4       | 16      | E    | 0           | 118832.146   | -0.014                     | 109.3630  |
| 34   | 7      | 28     | 34    | 6       | 29      | E    | 1           | 118851.712   | -0.090                     | 324.6406  |
| 22   | 5      | 17     | 21    | 6       | 16      | A    | 0           | 118894.965   | -0.008                     | 122.2331  |
| 34   | 7      | 28     | 34    | 6       | 29      | E    | 0           | 118911.589   | 0.014                      | 196.3146  |
| 34   | 7      | 28     | 34    | 6       | 29      | A    | 0           | 118920.877   | 0.014                      | 196.3067  |
| 22   | 5      | 17     | 21    | 6       | 16      | E    | 0           | 118925.668   | 0.039                      | 122.2425  |
| 41   | 13     | 29     | 40    | 14      | 26      | E    | 0           | 119004.190   | -0.024                     | 274.7772  |
| 18   | 11     | 8      | 18    | 10      | 9       | E    | 0           | 119023.307   | 0.023                      | 121.5055  |
| 18   | 11     | 7      | 18    | 10      | 8       | E    | 0           | 119041.339   | -0.049                     | 121.5180  |
| 18   | 11     | 8      | 18    | 10      | 9       | A    | 0           | 119071.531   | -0.001                     | 121.5068  |
| 41   | 13     | 29     | 40    | 14      | 26      | A    | 0           | 119120.584   | -0.015                     | 274.7714  |
| 34   | 12     | 22     | 34    | 11      | 23      | A    | 0           | 119233.942   | 0.006                      | 214.1831  |
| 51   | 15     | 36     | 51    | 14      | 37      | E    | 0           | 119237.838   | -0.020                     | 383.3181  |
| 17   | 11     | 7      | 17    | 10      | 8       | E    | 0           | 119244.336   | 0.008                      | 117.7842  |
| 17   | 11     | 6      | 17    | 10      | 7       | E    | 0           | 119262.114   | -0.033                     | 117.7967  |
| 34   | 12     | 22     | 34    | 11      | 23      | E    | 0           | 119282.227   | -0.077                     | 214.1885  |
| 17   | 11     | 7      | 17    | 10      | 8       | A    | 0           | 119292.322   | 0.015                      | 117.7855  |
| 51   | 15     | 36     | 51    | 14      | 37      | A    | 0           | 119318.333   | 0.017                      | 383.3135  |
| 19   | 7      | 13     | 18    | 7       | 12      | A    | 0           | 119416.595   | -0.004                     | 111.9938  |
| 35   | 12     | 24     | 35    | 11      | 25      | E    | 0           | 119417.253   | 0.004                      | 221.5495  |
| 11   | 5      | 6      | 10    | 4       | 7       | A    | 0           | 119427.891   | 0.022                      | 81.6666   |
| 16   | 11     | 6      | 16    | 10      | 7       | E    | 0           | 119429.655   | 0.011                      | 114.2738  |
| 19   | 7      | 13     | 18    | 7       | 12      | E    | 0           | 119438.509   | 0.011                      | 112.0009  |
| 16   | 11     | 5      | 16    | 10      | 6       | E    | 0           | 119447.192   | -0.034                     | 114.2864  |
| 46   | 14     | 32     | 46    | 13      | 33      | E    | 0           | 119462.434   | -0.035                     | 326.1845  |
| 16   | 11     | 6      | 16    | 10      | 7       | A    | 0           | 119477.428   | 0.020                      | 114.2752  |
| 35   | 12     | 24     | 35    | 11      | 25      | A    | 0           | 119529.402   | 0.011                      | 221.5450  |
| 4    | 1      | 3      | 4     | 0       | 4       | A    | 1           | 119533.580   | -0.007                     | 197.9607  |
| 46   | 14     | 32     | 46    | 13      | 33      | A    | 0           | 119530.149   | 0.009                      | 326.1798  |
| 15   | 11     | 5      | 15    | 10      | 6       | E    | 0           | 119583.600   | 0.012                      | 110.9737  |
| 15   | 11     | 4      | 15    | 10      | 5       | E    | 0           | 119600.932   | -0.041                     | 110.9863  |
| 43   | 14     | 30     | 42    | 15      | 27      | A    | 0           | 119619.223   | -0.004                     | 297.3956  |
| 15   | 11     | 5      | 15    | 10      | 6       | A    | 0           | 119631.200   | 0.026                      | 110.9751  |
| 15   | 11     | 4      | 15    | 10      | 5       | A    | 0           | 119631.200   | 0.027                      | 110.9751  |
| 19   | 6      | 14     | 18    | 6       | 13      | A    | 0           | 119669.079   | -0.006                     | 109.6336  |
| 19   | 6      | 14     | 18    | 6       | 13      | E    | 0           | 119671.083   | 0.004                      | 109.6429  |
| 14   | 11     | 4      | 14    | 10      | 5       | E    | 0           | 119710.134   | 0.019                      | 107.8832  |
| 14   | 11     | 3      | 14    | 10      | 4       | E    | 0           | 119727.293   | -0.045                     | 107.8958  |
| 14   | 11     | 4      | 14    | 10      | 5       | A    | 0           | 119757.583   | 0.029                      | 107.8846  |
| 14   | 11     | 3      | 14    | 10      | 4       | A    | 0           | 119757.583   | 0.029                      | 107.8846  |
| 13   | 11     | 3      | 13    | 10      | 4       | E    | 0           | 119812.855   | 0.023                      | 105.0016  |
| 13   | 11     | 2      | 13    | 10      | 3       | E    | 0           | 119829.882   | -0.041                     | 105.0141  |
| 43   | 14     | 30     | 42    | 15      | 28      | E    | 0           | 119830.902   | -0.053                     | 297.3881  |
| 19   | 7      | 12     | 18    | 7       | 11      | E    | 0           | 119851.464   | -0.002                     | 112.0182  |
| 19   | 7      | 12     | 18    | 7       | 11      | A    | 0           | 119869.996   | -0.000                     | 112.0083  |
| 27   | 2      | 25     | 27    | 1       | 26      | A    | 1           | 119876.395   | 0.000                      | 267.1099  |
| 27   | 3      | 25     | 27    | 2       | 26      | A    | 1           | 119877.036   | -0.020                     | 267.1099  |
| 12   | 11     | 2      | 12    | 10      | 3       | E    | 0           | 119895.040   | 0.013                      | 102.3282  |
| 12   | 11     | 1      | 12    | 10      | 2       | E    | 0           | 119911.959   | -0.054                     | 102.3408  |
| 12   | 11     | 2      | 12    | 10      | 3       | A    | 0           | 119942.278   | 0.029                      | 102.3296  |
| 12   | 11     | 1      | 12    | 10      | 2       | A    | 0           | 119942.278   | 0.029                      | 102.3296  |
| 20   | 4      | 17     | 19    | 4       | 16      | E    | 1           | 119953.708   | -0.026                     | 237.6968  |
| 20   | 4      | 17     | 19    | 4       | 16      | E    | 0           | 119959.327   | -0.008                     | 109.3630  |
| 20   | 4      | 17     | 19    | 4       | 16      | A    | 0           | 119962.004   | -0.006                     | 109.3526  |
| 11   | 11     | 0      | 11    | 10      | 1       | E    | 0           | 119976.549   | -0.053                     | 99.8752   |
| 21   | 2      | 19     | 20    | 3       | 18      | A    | 1           | 120045.827   | 0.007                      | 239.4809  |
| 4    | 1      | 3      | 4     | 0       | 4       | E    | 0           | 12008.040    | -0.018                     | 69.2417   |
| 21   | 3      | 19     | 20    | 3       | 18      | A    | 1           | 120084.447   | 0.011                      | 239.4809  |
| 4    | 1      | 3      | 4     | 0       | 4       | A    | 0           | 12009.952    | 0.024                      | 69.2298   |
| 21   | 2      | 19     | 20    | 3       | 18      | E    | 1           | 120115.597   | -0.028                     | 239.1380  |
| 39   | 8      | 31     | 39    | 7       | 32      | A    | 0           | 120117.700   | -0.021                     | 241.8701  |
| 21   | 2      | 19     | 20    | 2       | 18      | A    | 1           | 120119.059   | 0.017                      | 239.4784  |
| 39   | 8      | 31     | 39    | 7       | 32      | E    | 0           | 120122.874   | 0.011                      | 241.8766  |
| 21   | 2      | 19     | 20    | 3       | 18      | E    | 0           | 120130.795   | -0.006                     | 110.8049  |
| 21   | 2      | 19     | 20    | 3       | 18      | A    | 0           | 120132.890   | -0.006                     | 110.7942  |
| 21   | 3      | 19     | 20    | 2       | 18      | A    | 1           | 120157.662   | 0.004                      | 239.4784  |
| 21   | 3      | 19     | 20    | 3       | 18      | E    | 0           | 120171.685   | -0.013                     | 110.8049  |
| 21   | 3      | 19     | 20    | 3       | 18      | A    | 0           | 120173.921   | -0.007                     | 110.7942  |
| 21   | 2      | 19     | 20    | 2       | 18      | E    | 0           | 120208.081   | -0.009                     | 110.8023  |
| 21   | 2      | 19     | 20    | 2       | 18      | A    | 0           | 120210.411   | -0.013                     | 110.7916  |
| 45   | 15     | 31     | 44    | 16      | 29      | E    | 0           | 120219.472   | -0.012                     | 321.2193  |
| 22   | 1      | 21     | 21    | 2       | 20      | A    | 1           | 120234.543   | 0.015                      | 240.4808  |
| 22   | 2      | 21     | 21    | 2       | 20      | A    | 1           | 120235.177   | 0.001                      | 240.4808  |
| 22   | 1      | 21     | 21    | 1       | 20      | A    | 1           | 120235.880   | 0.026                      | 240.4807  |
| 22   | 2      | 21     | 21    | 1       | 20      | A    | 1           | 120236.481   | -0.021                     | 240.4807  |
| 21   | 3      | 19     | 20    | 2       | 18      | E    | 0           | 120248.978   | -0.010                     | 110.8023  |
| 21   | 3      | 19     | 20    | 2       | 18      | A    | 0           | 120251.444   | -0.012                     | 110.7916  |
| 22   | 1      | 21     | 21    | 2       | 20      | E    | 1           | 120277.826   | -0.010                     | 240.1249  |
| 22   | 2      | 21     | 21    | 2       | 20      | E    | 1           | 120278.514   | -0.040                     | 240.1249  |
| 22   | 1      | 21     | 21    | 1       | 20      | E    | 1           | 120279.282   | -0.015                     | 240.1249  |
| 22   | 2      | 21     | 21    | 1       | 20      | E    | 1           | 120279.991   | -0.024                     | 240.1249  |
| 57   | 14     | 43     | 57    | 13      | 44      | E    | 0           | 120295.895   | -0.032                     | 451.6683  |
| 22   | 1      | 21     | 21    | 2       | 20      | E    | 0           | 120299.013   | -0.011                     | 111.7943  |
| 22   | 2      | 21     | 21    | 2       | 20      | E    | 0           | 120299.711   | -0.007                     | 111.7943  |
| 22   | 1      | 21     | 21    | 2       | 20      | A    | 0           | 120300.359   | 0.008                      | 111.7833  |
| 22   | 1      | 21     | 21    | 1       | 20      | E    | 0           | 120300.359   | -0.080                     | 111.7943  |
| 22   | 2      | 21     | 21    | 2       | 20      | A    | 0           | 120301.095   | 0.048                      | 111.7833  |
| 22   | 1      | 21     | 21    | 1       | 20      | A    | 0           | 120301.747   | -0.024                     | 111.7832  |
| 22   | 2      | 21     | 21    | 1       | 20      | A    | 0           | 120302.450   | -0.017                     | 111.7832  |



| $J'$ | $K'_a$ | $K'_c$ | $J''$ | $K''_a$ | $K''_c$ | Sym. | $v_{tCH_3}$ | $\nu_{Obs.}$ | $\nu_{Obs.} - \nu_{Calc.}$ | $E_{low}$ |
|------|--------|--------|-------|---------|---------|------|-------------|--------------|----------------------------|-----------|
| 27   | 2      | 25     | 27    | 1       | 26      | E    | 0           | 120419.125   | 0.036                      | 138.4370  |
| 27   | 3      | 25     | 27    | 2       | 26      | E    | 0           | 120419.843   | 0.038                      | 138.4370  |
| 64   | 25     | 40     | 63    | 26      | 38      | E    | 0           | 120428.751   | -0.111                     | 612.4290  |
| 64   | 25     | 40     | 63    | 26      | 37      | A    | 0           | 120430.695   | -0.007                     | 612.4407  |
| 23   | 0      | 23     | 22    | 0       | 22      | A    | 1           | 120438.881   | 0.020                      | 241.0555  |
| 23   | 0      | 23     | 22    | 1       | 22      | A    | 1           | 120438.881   | 0.029                      | 241.0555  |
| 23   | 1      | 23     | 22    | 0       | 22      | A    | 1           | 120438.881   | 0.016                      | 241.0555  |
| 23   | 1      | 23     | 22    | 1       | 22      | A    | 1           | 120438.881   | 0.025                      | 241.0555  |
| 23   | 0      | 23     | 22    | 0       | 22      | E    | 1           | 120451.881   | -0.032                     | 240.6811  |
| 23   | 1      | 23     | 22    | 1       | 22      | E    | 1           | 120451.881   | -0.027                     | 240.6811  |
| 23   | 0      | 23     | 22    | 0       | 22      | E    | 0           | 120480.006   | -0.044                     | 112.3546  |
| 23   | 0      | 23     | 22    | 1       | 22      | E    | 0           | 120480.006   | -0.034                     | 112.3546  |
| 23   | 1      | 23     | 22    | 0       | 22      | E    | 0           | 120480.006   | -0.049                     | 112.3546  |
| 23   | 1      | 23     | 22    | 1       | 22      | E    | 0           | 120480.006   | -0.039                     | 112.3546  |
| 23   | 0      | 23     | 22    | 0       | 22      | A    | 0           | 120480.467   | 0.013                      | 112.3430  |
| 23   | 0      | 23     | 22    | 1       | 22      | A    | 0           | 120480.467   | 0.023                      | 112.3430  |
| 23   | 1      | 23     | 22    | 0       | 22      | A    | 0           | 120480.467   | 0.008                      | 112.3430  |
| 23   | 1      | 23     | 22    | 1       | 22      | A    | 0           | 120480.467   | 0.018                      | 112.3430  |
| 27   | 2      | 25     | 27    | 1       | 26      | E    | 1           | 120512.005   | -0.003                     | 266.7627  |
| 27   | 3      | 25     | 27    | 2       | 26      | E    | 1           | 120512.732   | -0.023                     | 266.7627  |
| 70   | 19     | 51     | 70    | 18      | 52      | E    | 0           | 120574.353   | -0.018                     | 654.1966  |
| 47   | 16     | 32     | 46    | 17      | 29      | A    | 0           | 120575.998   | -0.046                     | 346.2659  |
| 20   | 3      | 17     | 19    | 3       | 16      | A    | 1           | 120602.600   | 0.019                      | 237.9714  |
| 34   | 12     | 23     | 34    | 11      | 24      | E    | 0           | 120606.684   | 0.049                      | 214.1303  |
| 70   | 19     | 51     | 70    | 18      | 52      | A    | 0           | 120635.468   | -0.066                     | 654.1926  |
| 47   | 16     | 32     | 46    | 17      | 30      | E    | 0           | 120668.444   | 0.003                      | 346.2567  |
| 20   | 3      | 17     | 19    | 3       | 16      | E    | 0           | 120732.704   | -0.019                     | 109.2996  |
| 20   | 3      | 17     | 19    | 3       | 16      | A    | 0           | 120736.995   | -0.008                     | 109.2891  |
| 34   | 12     | 23     | 34    | 11      | 24      | A    | 0           | 120748.661   | 0.007                      | 214.1262  |
| 41   | 13     | 28     | 40    | 14      | 27      | A    | 0           | 120777.478   | 0.013                      | 274.7682  |
| 4    | 1      | 3      | 4     | 0       | 4       | E    | 1           | 12083.049    | -0.039                     | 197.5775  |
| 44   | 12     | 33     | 44    | 11      | 34      | E    | 0           | 120976.405   | -0.020                     | 298.0148  |
| 65   | 18     | 47     | 65    | 17      | 48      | E    | 0           | 121015.308   | -0.006                     | 574.9724  |
| 33   | 12     | 21     | 33    | 11      | 22      | A    | 0           | 121092.435   | 0.012                      | 206.9641  |
| 65   | 18     | 47     | 65    | 17      | 48      | A    | 0           | 121094.814   | -0.037                     | 574.9683  |
| 49   | 17     | 33     | 48    | 18      | 30      | A    | 0           | 121155.510   | -0.029                     | 372.5097  |
| 33   | 12     | 21     | 33    | 11      | 22      | E    | 0           | 121160.637   | -0.069                     | 206.9698  |
| 49   | 17     | 32     | 48    | 18      | 31      | A    | 0           | 121190.284   | 0.005                      | 372.5096  |
| 49   | 17     | 33     | 48    | 18      | 31      | E    | 0           | 121217.225   | 0.005                      | 372.4996  |
| 49   | 17     | 32     | 48    | 18      | 30      | E    | 0           | 121227.401   | 0.059                      | 372.5112  |
| 9    | 7      | 3      | 10    | 6       | 5       | E    | 0           | 12124.255    | -0.324                     | 85.4332   |
| 29   | 3      | 26     | 29    | 2       | 27      | A    | 1           | 121567.636   | 0.125                      | 281.6832  |
| 29   | 4      | 26     | 29    | 3       | 27      | A    | 1           | 121571.909   | 0.133                      | 281.6832  |
| 9    | 7      | 2      | 10    | 6       | 4       | E    | 0           | 12160.407    | -0.461                     | 85.4419   |
| 70   | 18     | 52     | 70    | 17      | 53      | E    | 0           | 121622.361   | 0.087                      | 650.1397  |
| 20   | 4      | 17     | 19    | 3       | 16      | A    | 1           | 121679.328   | 0.023                      | 237.9714  |
| 9    | 7      | 3      | 10    | 6       | 4       | A    | 0           | 12169.308    | -0.025                     | 85.4284   |
| 9    | 7      | 2      | 10    | 6       | 5       | A    | 0           | 12173.359    | 0.067                      | 85.4282   |
| 33   | 12     | 22     | 33    | 11      | 23      | E    | 0           | 121783.647   | 0.039                      | 206.9360  |
| 40   | 13     | 27     | 40    | 12      | 28      | E    | 0           | 121851.496   | -0.034                     | 266.0206  |
| 20   | 4      | 17     | 19    | 3       | 16      | E    | 0           | 121859.889   | -0.007                     | 109.2996  |
| 20   | 4      | 17     | 19    | 3       | 16      | A    | 0           | 121867.107   | -0.004                     | 109.2891  |
| 40   | 13     | 27     | 40    | 12      | 28      | A    | 0           | 121879.796   | 0.004                      | 266.0160  |
| 20   | 4      | 17     | 19    | 3       | 16      | E    | 1           | 121883.325   | 0.022                      | 237.6324  |
| 33   | 12     | 22     | 33    | 11      | 23      | A    | 0           | 121943.377   | 0.003                      | 206.9325  |
| 29   | 3      | 26     | 29    | 2       | 27      | E    | 0           | 122075.748   | 0.035                      | 153.0348  |
| 29   | 4      | 26     | 29    | 3       | 27      | E    | 0           | 122080.342   | 0.024                      | 153.0348  |
| 29   | 3      | 26     | 29    | 2       | 27      | A    | 0           | 122093.276   | 0.061                      | 153.0248  |
| 29   | 4      | 26     | 29    | 3       | 27      | A    | 0           | 122097.892   | 0.053                      | 153.0248  |
| 12   | 5      | 8      | 11    | 4       | 7       | E    | 0           | 122106.820   | -0.042                     | 84.0766   |
| 29   | 3      | 26     | 29    | 2       | 27      | E    | 1           | 122138.040   | -0.037                     | 281.3618  |
| 29   | 4      | 26     | 29    | 3       | 27      | E    | 1           | 122142.851   | -0.041                     | 281.3619  |
| 12   | 5      | 8      | 11    | 4       | 7       | A    | 0           | 122148.702   | 0.020                      | 84.0657   |
| 39   | 12     | 27     | 38    | 13      | 26      | A    | 0           | 122287.215   | -0.026                     | 253.3488  |
| 39   | 12     | 27     | 38    | 13      | 26      | E    | 0           | 122454.779   | -0.216                     | 253.3476  |
| 54   | 13     | 41     | 54    | 12      | 42      | A    | 0           | 122472.975   | -0.111                     | 411.2473  |
| 54   | 13     | 41     | 54    | 12      | 42      | E    | 0           | 122519.219   | -0.039                     | 411.2510  |
| 19   | 6      | 13     | 18    | 6       | 12      | A    | 0           | 122529.570   | -0.000                     | 109.7686  |
| 19   | 6      | 13     | 18    | 6       | 12      | E    | 0           | 122532.121   | 0.019                      | 109.7783  |
| 32   | 12     | 20     | 32    | 11      | 21      | A    | 0           | 122614.226   | 0.008                      | 199.9810  |
| 37   | 7      | 30     | 37    | 6       | 31      | E    | 1           | 122619.808   | -0.125                     | 350.3622  |
| 19   | 4      | 15     | 18    | 4       | 14      | A    | 1           | 122634.047   | 0.019                      | 235.6827  |
| 42   | 9      | 33     | 42    | 8       | 34      | A    | 0           | 122640.284   | -0.039                     | 271.3498  |
| 43   | 11     | 33     | 43    | 10      | 34      | E    | 0           | 122656.189   | -0.016                     | 284.6216  |
| 41   | 10     | 32     | 41    | 9       | 33      | A    | 0           | 122658.982   | -0.021                     | 262.7468  |
| 43   | 11     | 33     | 43    | 10      | 34      | A    | 0           | 122665.000   | -0.035                     | 284.6163  |
| 32   | 12     | 20     | 32    | 11      | 21      | E    | 0           | 122680.672   | -0.053                     | 199.9874  |
| 19   | 4      | 15     | 18    | 4       | 14      | E    | 1           | 122759.914   | -0.015                     | 235.3363  |
| 37   | 7      | 30     | 37    | 6       | 31      | E    | 0           | 122767.884   | 0.012                      | 222.0404  |
| 37   | 7      | 30     | 37    | 6       | 31      | A    | 0           | 122771.066   | -0.004                     | 222.0333  |
| 19   | 4      | 15     | 18    | 4       | 14      | E    | 0           | 122782.364   | -0.010                     | 107.0063  |
| 19   | 4      | 15     | 18    | 4       | 14      | A    | 0           | 122787.022   | -0.014                     | 106.9954  |
| 32   | 12     | 21     | 32    | 11      | 22      | E    | 0           | 122920.301   | 0.002                      | 199.9665  |
| 60   | 17     | 43     | 60    | 16      | 44      | E    | 0           | 123018.434   | -0.009                     | 501.5358  |
| 32   | 12     | 21     | 32    | 11      | 22      | A    | 0           | 123076.525   | 0.005                      | 199.9640  |
| 39   | 9      | 31     | 39    | 8       | 32      | E    | 1           | 123123.181   | -0.057                     | 370.2087  |
| 20   | 16     | 4      | 19    | 16      | 3       | A    | 0           | 123226.564   | -0.056                     | 155.0564  |
| 20   | 16     | 5      | 19    | 16      | 4       | A    | 0           | 123226.564   | -0.056                     | 155.0564  |
| 20   | 16     | 5      | 19    | 16      | 4       | E    | 0           | 123226.976   | 0.008                      | 155.0466  |
| 39   | 9      | 31     | 39    | 8       | 32      | E    | 0           | 123261.983   | 0.004                      | 241.8914  |
| 31   | 4      | 27     | 31    | 3       | 28      | E    | 0           | 123263.576   | 0.024                      | 168.7062  |
| 39   | 9      | 31     | 39    | 8       | 32      | A    | 0           | 123267.668   | -0.011                     | 241.8850  |
| 31   | 4      | 27     | 31    | 3       | 28      | A    | 0           | 123278.758   | 0.043                      | 168.6969  |
| 31   | 5      | 27     | 31    | 4       | 28      | E    | 0           | 123286.866   | -0.001                     | 168.7062  |
| 31   | 4      | 27     | 31    | 3       | 28      | E    | 1           | 123290.168   | -0.059                     | 297.0337  |
| 31   | 5      | 27     | 31    | 4       | 28      | A    | 0           | 123302.171   | 0.041                      | 168.6970  |
| 26   | 1      | 25     | 26    | 0       | 26      | A    | 0           | 123309.288   | 0.093                      | 129.4449  |
| 26   | 2      | 25     | 26    | 1       | 26      | A    | 0           | 123309.288   | 0.055                      | 129.4449  |
| 31   | 5      | 27     | 31    | 4       | 28      | E    | 1           | 123314.553   | -0.065                     | 297.0338  |
| 20   | 15     | 6      | 19    | 15      | 5       | A    | 0           | 123319.393   | -0.041                     | 149.1539  |
| 20   | 15     | 5      | 19    | 15      | 4       | A    | 0           | 123319.393   | -0.041                     | 149.1539  |
| 20   | 15     | 6      | 19    | 15      | 5       | E    | 0           | 123319.857   | -0.022                     | 149.1453  |
| 26   | 1      | 25     | 26    | 0       | 26      | E    | 1           | 123411.795   | 0.026                      | 257.7789  |
| 26   | 2      | 25     | 26    | 1       | 26      | E    | 1           | 123411.795   | -0.013                     | 257.7789  |
| 8    | 7      | 2      | 7     | 6       | 2       | E    | 0           | 123482.312   | -0.000                     | 79.8679   |
| 8    | 7      | 1      | 7     | 6       | 1       | E    | 0           | 123517.166   | -0.017                     | 79.8767   |
| 8    | 7      | 1      | 7     | 6       | 2       | A    | 0           | 123527.792   | -0.002                     | 79.8631   |
| 20   | 13     | 8      | 19    | 13      | 7       | A    | 0           | 123573.070   | -0.020                     | 138.5039  |
| 20   | 13     | 7      | 19    | 13      | 6       | A    | 0           | 123573.070   | -0.020                     | 138.5039  |
| 20   | 13     | 8      | 19    | 13      | 7       | E    | 0           | 123573.822   | 0.020                      | 138.4980  |
| 21   | 4      | 17     | 20    | 5       | 16      | A    | 0           | 123726.697   | -0.010                     | 115.6435  |
| 21   | 4      | 17     | 20    | 5       | 16      | E    | 0           | 123737.209   | 0.015                      | 115.6535  |
| 20   | 12     | 8      | 19    | 12      | 7       | A    | 0           | 123750.712   | -0.022                     | 133.7588  |
| 20   | 12     | 9      | 19    | 12      | 8       | A    | 0           | 123750.712   | -0.021                     | 133.7588  |
| 20   | 12     | 8      | 19    | 12      | 7       | E    | 0           | 123751.135   | 0.063                      | 133.7678  |
| 20   | 12     | 9      | 19    | 12      | 8       | E    | 0           | 123751.643   | 0.007                      | 133.7544  |



| $J'$ | $K'_a$ | $K'_c$ | $J''$ | $K''_a$ | $K''_c$ | Sym. | $v_{tCH_3}$ | $\nu_{Obs.}$ | $\nu_{Obs.} - \nu_{Calc.}$ | $E_{low}$ |
|------|--------|--------|-------|---------|---------|------|-------------|--------------|----------------------------|-----------|
| 35   | 6      | 29     | 35    | 5       | 30      | E    | 1           | 123764.964   | -0.092                     | 331.5474  |
| 37   | 8      | 30     | 37    | 7       | 31      | E    | 1           | 123795.060   | -0.086                     | 350.3667  |
| 35   | 6      | 29     | 35    | 5       | 30      | E    | 0           | 123835.969   | 0.012                      | 203.2222  |
| 35   | 6      | 29     | 35    | 5       | 30      | A    | 0           | 123844.544   | 0.016                      | 203.2145  |
| 21   | 4      | 17     | 20    | 5       | 16      | A    | 1           | 123852.845   | -0.016                     | 244.3096  |
| 12   | 4      | 8      | 11    | 3       | 9       | E    | 0           | 123876.936   | 0.010                      | 82.5268   |
| 31   | 12     | 19     | 31    | 11      | 20      | A    | 0           | 123883.644   | 0.010                      | 193.2289  |
| 33   | 5      | 28     | 33    | 4       | 29      | E    | 1           | 123884.653   | -0.087                     | 313.7664  |
| 37   | 8      | 30     | 37    | 7       | 31      | E    | 0           | 123894.222   | 0.012                      | 222.0446  |
| 33   | 5      | 28     | 33    | 4       | 29      | E    | 0           | 123900.921   | 0.019                      | 185.4395  |
| 37   | 8      | 30     | 37    | 7       | 31      | A    | 0           | 123901.633   | 0.005                      | 222.0376  |
| 33   | 5      | 28     | 33    | 4       | 29      | A    | 0           | 123913.221   | 0.015                      | 185.4310  |
| 31   | 12     | 19     | 31    | 11      | 20      | E    | 0           | 123928.353   | -0.073                     | 193.2363  |
| 20   | 11     | 10     | 19    | 11      | 9       | A    | 0           | 123980.810   | -0.019                     | 129.4030  |
| 20   | 11     | 10     | 19    | 11      | 9       | E    | 0           | 123981.980   | -0.009                     | 129.4001  |
| 33   | 6      | 28     | 33    | 5       | 29      | E    | 1           | 123987.402   | -0.080                     | 313.7667  |
| 20   | 5      | 16     | 19    | 5       | 15      | E    | 0           | 123988.260   | -0.002                     | 111.5177  |
| 20   | 5      | 16     | 19    | 5       | 15      | A    | 0           | 123989.997   | -0.005                     | 111.5077  |
| 31   | 12     | 20     | 31    | 11      | 21      | E    | 0           | 123993.586   | 0.048                      | 193.2213  |
| 33   | 6      | 28     | 33    | 5       | 29      | A    | 0           | 124011.875   | 0.031                      | 185.4312  |
| 45   | 12     | 34     | 45    | 11      | 35      | A    | 0           | 124014.091   | -0.052                     | 307.4948  |
| 51   | 12     | 39     | 51    | 11      | 40      | A    | 0           | 124042.011   | -0.097                     | 372.9957  |
| 51   | 12     | 39     | 51    | 11      | 40      | E    | 0           | 124081.194   | -0.031                     | 372.9997  |
| 31   | 12     | 20     | 31    | 11      | 21      | A    | 0           | 124126.591   | 0.002                      | 193.2200  |
| 35   | 7      | 29     | 35    | 6       | 30      | E    | 1           | 124136.652   | -0.081                     | 331.5485  |
| 57   | 21     | 37     | 56    | 22      | 35      | E    | 0           | 124159.566   | 0.038                      | 489.5152  |
| 44   | 13     | 32     | 44    | 12      | 33      | E    | 0           | 124167.952   | -0.023                     | 302.0501  |
| 45   | 10     | 35     | 45    | 9       | 36      | A    | 0           | 124183.578   | -0.061                     | 303.0366  |
| 35   | 7      | 29     | 35    | 6       | 30      | E    | 0           | 124191.606   | 0.004                      | 203.2233  |
| 35   | 7      | 29     | 35    | 6       | 30      | A    | 0           | 124201.602   | 0.018                      | 203.2156  |
| 45   | 10     | 35     | 45    | 9       | 36      | E    | 0           | 124204.473   | -0.011                     | 303.0417  |
| 44   | 13     | 32     | 44    | 12      | 33      | A    | 0           | 124208.049   | -0.021                     | 302.0459  |
| 10   | 6      | 5      | 9     | 5       | 5       | E    | 0           | 124242.020   | -0.014                     | 81.2889   |
| 10   | 6      | 5      | 9     | 5       | 4       | A    | 0           | 124263.192   | -0.004                     | 81.2833   |
| 10   | 6      | 4      | 9     | 5       | 4       | E    | 0           | 124277.732   | -0.006                     | 81.2964   |
| 20   | 10     | 11     | 19    | 10      | 10      | E    | 0           | 124289.453   | 0.017                      | 125.4387  |
| 10   | 6      | 4      | 9     | 5       | 5       | A    | 0           | 124305.368   | 0.028                      | 81.2820   |
| 43   | 13     | 31     | 43    | 12      | 32      | E    | 0           | 124315.769   | -0.021                     | 292.6701  |
| 43   | 13     | 31     | 43    | 12      | 32      | A    | 0           | 124361.630   | -0.017                     | 292.6659  |
| 21   | 3      | 18     | 20    | 4       | 17      | A    | 1           | 124437.924   | 0.007                      | 242.0302  |
| 21   | 3      | 18     | 20    | 4       | 17      | E    | 1           | 124490.606   | -0.035                     | 241.6980  |
| 21   | 3      | 18     | 20    | 4       | 17      | E    | 0           | 124512.980   | -0.004                     | 113.3644  |
| 21   | 3      | 18     | 20    | 4       | 17      | A    | 0           | 124513.997   | -0.004                     | 113.3541  |
| 45   | 13     | 33     | 45    | 12      | 34      | E    | 0           | 124572.399   | -0.017                     | 311.6357  |
| 45   | 13     | 33     | 45    | 12      | 34      | A    | 0           | 124607.087   | -0.024                     | 311.6315  |
| 48   | 11     | 37     | 48    | 10      | 38      | A    | 0           | 124654.358   | -0.078                     | 336.9219  |
| 48   | 11     | 37     | 48    | 10      | 38      | E    | 0           | 124684.559   | -0.015                     | 336.9264  |
| 20   | 9      | 12     | 19    | 9       | 11      | A    | 0           | 124711.635   | 0.006                      | 121.8751  |
| 20   | 9      | 11     | 19    | 9       | 10      | E    | 0           | 124714.822   | 0.002                      | 121.8872  |
| 20   | 9      | 12     | 19    | 9       | 11      | E    | 0           | 124716.578   | 0.006                      | 121.8756  |
| 20   | 9      | 11     | 19    | 9       | 10      | A    | 0           | 124717.565   | 0.001                      | 121.8753  |
| 28   | 2      | 26     | 28    | 1       | 27      | A    | 1           | 124822.869   | -0.060                     | 272.1468  |
| 28   | 3      | 26     | 28    | 2       | 27      | A    | 1           | 124823.270   | 0.012                      | 272.1468  |
| 42   | 13     | 30     | 42    | 12      | 31      | E    | 0           | 124911.810   | -0.018                     | 283.5014  |
| 45   | 14     | 31     | 45    | 13      | 32      | E    | 0           | 124915.457   | -0.040                     | 316.1714  |
| 30   | 12     | 18     | 30    | 11      | 19      | A    | 0           | 124960.286   | 0.018                      | 186.7043  |
| 42   | 13     | 30     | 42    | 12      | 31      | A    | 0           | 124964.589   | -0.014                     | 283.4974  |
| 45   | 14     | 31     | 45    | 13      | 32      | A    | 0           | 124971.606   | 0.004                      | 316.1672  |
| 30   | 12     | 18     | 30    | 11      | 19      | E    | 0           | 124976.500   | -0.049                     | 186.7128  |
| 30   | 12     | 19     | 30    | 11      | 20      | E    | 0           | 124980.406   | -0.001                     | 186.6997  |
| 8    | 3      | 5      | 7     | 4       | 4       | A    | 0           | 13215.224    | -0.005                     | 76.0645   |
| 6    | 2      | 4      | 5     | 3       | 3       | A    | 0           | 13257.415    | -0.051                     | 72.0506   |
| 8    | 2      | 7      | 7     | 3       | 4       | A    | 0           | 13418.087    | 0.002                      | 74.7937   |
| 3    | 0      | 3      | 2     | 1       | 2       | A    | 0           | 13446.143    | 0.001                      | 68.0041   |
| 3    | 0      | 3      | 2     | 1       | 2       | E    | 0           | 13448.462    | 0.000                      | 68.0160   |
| 3    | 0      | 3      | 2     | 1       | 2       | A    | 1           | 13484.113    | 0.005                      | 196.7344  |
| 26   | 0      | 26     | 25    | 0       | 25      | A    | 1           | 135825.665   | 0.093                      | 253.6209  |
| 26   | 0      | 26     | 25    | 1       | 25      | A    | 1           | 135825.665   | 0.094                      | 253.6209  |
| 26   | 1      | 26     | 25    | 0       | 25      | A    | 1           | 135825.665   | 0.093                      | 253.6209  |
| 26   | 1      | 26     | 25    | 1       | 25      | A    | 1           | 135825.665   | 0.094                      | 253.6209  |
| 26   | 0      | 26     | 25    | 0       | 25      | E    | 1           | 135838.273   | -0.028                     | 253.2478  |
| 26   | 1      | 26     | 25    | 1       | 25      | E    | 1           | 135838.273   | -0.028                     | 253.2478  |
| 3    | 0      | 3      | 2     | 1       | 2       | E    | 1           | 13596.449    | 0.002                      | 196.3471  |
| 26   | 1      | 25     | 25    | 1       | 24      | A    | 1           | 140745.011   | -0.025                     | 257.5494  |
| 26   | 1      | 25     | 25    | 2       | 24      | A    | 1           | 140745.011   | 0.048                      | 257.5494  |
| 26   | 2      | 25     | 25    | 1       | 24      | A    | 1           | 140745.011   | -0.060                     | 257.5494  |
| 26   | 2      | 25     | 25    | 2       | 24      | A    | 1           | 140745.011   | 0.013                      | 257.5494  |
| 26   | 1      | 25     | 25    | 1       | 24      | E    | 1           | 140787.598   | -0.053                     | 257.1993  |
| 26   | 1      | 25     | 25    | 2       | 24      | E    | 1           | 140787.598   | 0.030                      | 257.1993  |
| 26   | 2      | 25     | 25    | 1       | 24      | E    | 1           | 140787.598   | -0.092                     | 257.1993  |
| 26   | 2      | 25     | 25    | 2       | 24      | E    | 1           | 140787.598   | -0.010                     | 257.1993  |
| 27   | 0      | 27     | 26    | 0       | 26      | A    | 1           | 140954.348   | -0.006                     | 258.1516  |
| 27   | 0      | 27     | 26    | 1       | 26      | A    | 1           | 140954.348   | -0.006                     | 258.1516  |
| 27   | 1      | 27     | 26    | 0       | 26      | A    | 1           | 140954.348   | -0.007                     | 258.1516  |
| 27   | 1      | 27     | 26    | 1       | 26      | A    | 1           | 140954.348   | -0.006                     | 258.1516  |
| 27   | 0      | 27     | 26    | 0       | 26      | E    | 1           | 140966.918   | -0.060                     | 257.7789  |
| 27   | 0      | 27     | 26    | 1       | 26      | E    | 1           | 140966.918   | -0.060                     | 257.7789  |
| 27   | 1      | 27     | 26    | 0       | 26      | E    | 1           | 140966.918   | -0.060                     | 257.7789  |
| 27   | 1      | 27     | 26    | 1       | 26      | E    | 1           | 140966.918   | -0.060                     | 257.7789  |
| 5    | 2      | 3      | 5     | 1       | 4       | A    | 1           | 14185.700    | -0.029                     | 199.4372  |
| 4    | 2      | 2      | 4     | 1       | 3       | A    | 1           | 14200.428    | -0.023                     | 198.3594  |
| 5    | 2      | 3      | 5     | 1       | 4       | E    | 0           | 14306.415    | -0.007                     | 70.7208   |
| 5    | 2      | 3      | 5     | 1       | 4       | A    | 0           | 14311.508    | -0.007                     | 70.7090   |
| 4    | 2      | 2      | 4     | 1       | 3       | E    | 0           | 14334.766    | 0.015                      | 69.6422   |
| 4    | 2      | 2      | 4     | 1       | 3       | A    | 0           | 14339.955    | 0.011                      | 69.6304   |
| 41   | 7      | 34     | 41    | 6       | 35      | E    | 1           | 145060.006   | -0.132                     | 381.7546  |
| 39   | 6      | 33     | 39    | 5       | 34      | E    | 1           | 145106.724   | -0.108                     | 360.8802  |
| 47   | 15     | 33     | 47    | 14      | 34      | E    | 0           | 145498.020   | 0.011                      | 340.0750  |
| 25   | 3      | 22     | 24    | 4       | 21      | A    | 1           | 145551.740   | 0.041                      | 259.7470  |
| 47   | 15     | 33     | 47    | 14      | 34      | A    | 0           | 145580.670   | -0.019                     | 340.0732  |
| 24   | 5      | 20     | 23    | 5       | 19      | E    | 1           | 145587.347   | -0.015                     | 257.4912  |
| 54   | 14     | 41     | 54    | 13      | 42      | E    | 0           | 145589.927   | 0.016                      | 411.4748  |
| 24   | 5      | 20     | 23    | 5       | 19      | E    | 0           | 145594.166   | 0.018                      | 129.1591  |
| 25   | 4      | 22     | 24    | 4       | 21      | A    | 1           | 145609.471   | 0.070                      | 259.7470  |
| 25   | 3      | 22     | 24    | 4       | 21      | E    | 1           | 145646.639   | -0.058                     | 259.4281  |
| 25   | 3      | 22     | 24    | 4       | 21      | E    | 0           | 145663.310   | -0.028                     | 131.0960  |
| 25   | 3      | 22     | 24    | 4       | 21      | A    | 0           | 145666.187   | -0.004                     | 131.0860  |
| 23   | 8      | 15     | 22    | 8       | 14      | A    | 0           | 145671.000   | 0.019                      | 131.9361  |
| 26   | 2      | 24     | 25    | 3       | 23      | A    | 1           | 145697.591   | -0.048                     | 261.2177  |
| 26   | 3      | 24     | 25    | 3       | 23      | A    | 1           | 145699.089   | 0.094                      | 261.2177  |
| 26   | 2      | 24     | 25    | 2       | 23      | A    | 1           | 145700.448   | 0.115                      | 261.2176  |
| 26   | 3      | 24     | 25    | 2       | 23      | A    | 1           | 145701.678   | -0.010                     | 261.2176  |
| 25   | 4      | 22     | 24    | 3       | 21      | A    | 1           | 145716.203   | 0.023                      | 259.7434  |
| 25   | 4      | 22     | 24    | 4       | 21      | E    | 0           | 145724.870   | 0.082                      | 131.0960  |
| 25   | 4      | 22     | 24    | 4       | 21      | A    | 0           | 145727.880   | 0.017                      | 131.0860  |
| 26   | 2      | 24     | 25    | 3       | 23      | E    | 1           | 145768.955   | -0.029                     | 260.8869  |



| $J'$ | $K'_a$ | $K'_c$ | $J''$ | $K''_a$ | $K''_c$ | Sym. | $v_{tCH_3}$ | $\nu_{Obs.}$ | $\nu_{Obs.} - \nu_{Calc.}$ | $E_{low}$ |
|------|--------|--------|-------|---------|---------|------|-------------|--------------|----------------------------|-----------|
| 26   | 3      | 24     | 25    | 3       | 23      | E    | 1           | 145770.414   | -0.093                     | 260.8869  |
| 26   | 2      | 24     | 25    | 2       | 23      | E    | 1           | 145771.953   | -0.037                     | 260.8868  |
| 26   | 3      | 24     | 25    | 2       | 23      | E    | 1           | 145773.474   | -0.039                     | 260.8868  |
| 25   | 3      | 22     | 24    | 3       | 21      | E    | 0           | 145776.718   | 0.049                      | 131.0922  |
| 25   | 3      | 22     | 24    | 3       | 21      | A    | 0           | 145779.906   | -0.003                     | 131.0823  |
| 26   | 2      | 24     | 25    | 3       | 23      | E    | 0           | 145790.664   | -0.029                     | 132.5567  |
| 26   | 2      | 24     | 25    | 3       | 23      | A    | 0           | 145792.888   | 0.009                      | 132.5464  |
| 26   | 3      | 24     | 25    | 2       | 23      | E    | 0           | 145795.031   | -0.015                     | 132.5566  |
| 26   | 3      | 24     | 25    | 2       | 23      | A    | 0           | 145797.242   | -0.007                     | 132.5463  |
| 25   | 4      | 22     | 24    | 3       | 21      | E    | 1           | 145827.085   | -0.028                     | 259.4242  |
| 25   | 4      | 22     | 24    | 3       | 21      | E    | 0           | 145838.114   | -0.006                     | 131.0922  |
| 25   | 4      | 22     | 24    | 3       | 21      | A    | 0           | 145841.538   | -0.043                     | 131.0823  |
| 27   | 1      | 26     | 26    | 1       | 25      | A    | 1           | 145872.739   | 0.044                      | 262.2441  |
| 27   | 1      | 26     | 26    | 2       | 25      | A    | 1           | 145872.739   | 0.079                      | 262.2441  |
| 27   | 2      | 26     | 26    | 1       | 25      | A    | 1           | 145872.739   | 0.027                      | 262.2441  |
| 27   | 2      | 26     | 26    | 2       | 25      | A    | 1           | 145872.739   | 0.062                      | 262.2441  |
| 27   | 1      | 26     | 26    | 1       | 25      | E    | 1           | 145915.105   | -0.024                     | 261.8955  |
| 27   | 1      | 26     | 26    | 2       | 25      | E    | 1           | 145915.105   | 0.015                      | 261.8955  |
| 27   | 2      | 26     | 26    | 1       | 25      | E    | 1           | 145915.105   | -0.043                     | 261.8955  |
| 27   | 2      | 26     | 26    | 2       | 25      | E    | 1           | 145915.105   | -0.004                     | 261.8955  |
| 27   | 1      | 26     | 26    | 1       | 25      | E    | 0           | 145943.397   | 0.018                      | 133.5689  |
| 27   | 2      | 26     | 26    | 2       | 25      | E    | 0           | 145943.397   | 0.038                      | 133.5689  |
| 27   | 1      | 26     | 26    | 1       | 25      | A    | 0           | 145944.631   | -0.050                     | 133.5581  |
| 27   | 1      | 26     | 26    | 2       | 25      | A    | 0           | 145944.631   | -0.012                     | 133.5581  |
| 27   | 2      | 26     | 26    | 1       | 25      | A    | 0           | 145944.631   | -0.068                     | 133.5581  |
| 27   | 2      | 26     | 26    | 2       | 25      | A    | 0           | 145944.631   | -0.030                     | 133.5581  |
| 48   | 10     | 38     | 48    | 9       | 39      | A    | 0           | 146050.996   | -0.059                     | 332.0501  |
| 48   | 10     | 38     | 48    | 9       | 39      | E    | 0           | 146057.606   | 0.028                      | 332.0544  |
| 28   | 0      | 28     | 27    | 0       | 27      | A    | 1           | 146083.095   | 0.028                      | 262.8533  |
| 28   | 0      | 28     | 27    | 1       | 27      | A    | 1           | 146083.095   | 0.028                      | 262.8533  |
| 28   | 1      | 28     | 27    | 0       | 27      | A    | 1           | 146083.095   | 0.028                      | 262.8533  |
| 28   | 1      | 28     | 27    | 1       | 27      | A    | 1           | 146083.095   | 0.028                      | 262.8533  |
| 28   | 0      | 28     | 27    | 0       | 27      | E    | 1           | 146095.542   | -0.045                     | 262.4811  |
| 28   | 1      | 28     | 27    | 1       | 27      | E    | 1           | 146095.542   | -0.045                     | 262.4811  |
| 28   | 0      | 28     | 27    | 0       | 27      | A    | 0           | 146130.714   | -0.202                     | 134.1482  |
| 28   | 0      | 28     | 27    | 1       | 27      | A    | 0           | 146130.714   | -0.201                     | 134.1482  |
| 28   | 1      | 28     | 27    | 0       | 27      | A    | 0           | 146130.714   | -0.202                     | 134.1482  |
| 28   | 1      | 28     | 27    | 1       | 27      | A    | 0           | 146130.714   | -0.202                     | 134.1482  |
| 28   | 0      | 28     | 27    | 0       | 27      | E    | 0           | 146130.714   | -0.187                     | 134.1597  |
| 28   | 1      | 28     | 27    | 1       | 27      | E    | 0           | 146130.714   | 0.187                      | 134.1597  |
| 56   | 19     | 37     | 55    | 20      | 35      | E    | 0           | 146134.997   | -0.195                     | 462.5798  |
| 24   | 4      | 20     | 23    | 4       | 19      | E    | 0           | 146512.437   | 0.118                      | 129.0821  |
| 24   | 4      | 20     | 23    | 4       | 19      | A    | 0           | 146517.908   | 0.034                      | 129.0722  |
| 24   | 4      | 20     | 23    | 4       | 19      | E    | 1           | 146519.817   | 0.069                      | 257.4125  |
| 48   | 15     | 33     | 47    | 16      | 32      | E    | 0           | 146531.302   | -0.235                     | 350.2818  |
| 35   | 14     | 22     | 35    | 13      | 23      | E    | 0           | 147039.005   | 0.008                      | 229.9816  |
| 35   | 14     | 21     | 35    | 13      | 22      | E    | 0           | 147045.703   | -0.067                     | 229.9946  |
| 46   | 15     | 32     | 46    | 14      | 33      | E    | 0           | 147048.625   | -0.018                     | 330.0594  |
| 45   | 15     | 30     | 45    | 14      | 31      | A    | 0           | 147049.710   | 0.047                      | 320.3358  |
| 35   | 14     | 21     | 35    | 13      | 22      | A    | 0           | 147071.845   | -0.018                     | 229.9870  |
| 35   | 14     | 22     | 35    | 13      | 23      | A    | 0           | 147103.448   | -0.045                     | 229.9858  |
| 56   | 15     | 42     | 56    | 14      | 43      | E    | 0           | 147130.527   | -0.003                     | 439.9373  |
| 14   | 6      | 9      | 13    | 5       | 8       | A    | 0           | 147165.350   | 0.026                      | 90.9009   |
| 34   | 3      | 31     | 34    | 2       | 32      | E    | 1           | 147175.863   | 0.051                      | 310.8015  |
| 34   | 4      | 31     | 34    | 3       | 32      | E    | 1           | 147175.863   | -0.119                     | 310.8015  |
| 10   | 8      | 3      | 9     | 7       | 3       | E    | 0           | 147208.450   | -0.012                     | 85.8376   |
| 10   | 8      | 2      | 9     | 7       | 3       | A    | 0           | 147255.285   | 0.034                      | 85.8343   |
| 31   | 1      | 30     | 31    | 0       | 31      | A    | 1           | 147273.857   | -0.298                     | 283.3710  |
| 31   | 2      | 30     | 31    | 1       | 31      | A    | 1           | 147273.857   | -0.299                     | 283.3710  |
| 24   | 5      | 20     | 23    | 4       | 19      | A    | 1           | 147669.862   | 0.081                      | 257.7303  |
| 34   | 14     | 21     | 34    | 13      | 22      | E    | 0           | 147902.950   | -0.101                     | 222.6398  |
| 24   | 5      | 20     | 23    | 4       | 19      | E    | 0           | 147903.781   | 0.077                      | 129.0821  |
| 34   | 14     | 20     | 34    | 13      | 21      | E    | 0           | 147909.977   | -0.046                     | 222.6529  |
| 24   | 5      | 20     | 23    | 4       | 19      | A    | 0           | 147913.306   | 0.022                      | 129.0722  |
| 34   | 14     | 20     | 34    | 13      | 21      | A    | 0           | 147943.766   | 0.066                      | 222.6450  |
| 12   | 7      | 6      | 11    | 6       | 6       | E    | 0           | 147945.076   | 0.084                      | 87.7090   |
| 34   | 14     | 21     | 34    | 13      | 22      | A    | 0           | 147958.858   | -0.121                     | 222.6444  |
| 12   | 7      | 5      | 11    | 6       | 5       | E    | 0           | 147980.112   | -0.026                     | 87.7177   |
| 12   | 7      | 6      | 11    | 6       | 5       | A    | 0           | 147983.322   | 0.001                      | 87.7043   |
| 31   | 1      | 30     | 31    | 0       | 31      | E    | 0           | 147992.060   | 0.016                      | 154.6840  |
| 31   | 2      | 30     | 31    | 1       | 31      | E    | 0           | 147992.060   | 0.015                      | 154.6840  |
| 12   | 7      | 5      | 11    | 6       | 6       | A    | 0           | 147997.924   | 0.039                      | 87.7039   |
| 5    | 2      | 3      | 5     | 1       | 4       | E    | 1           | 14801.149    | 0.085                      | 199.0581  |
| 48   | 11     | 38     | 48    | 10      | 39      | E    | 1           | 148064.584   | 0.133                      | 460.3632  |
| 3    | 2      | 1      | 3     | 1       | 2       | A    | 1           | 14825.255    | -0.034                     | 197.4891  |
| 48   | 11     | 38     | 48    | 10      | 39      | E    | 0           | 148280.565   | -0.041                     | 332.0651  |
| 48   | 11     | 38     | 48    | 10      | 39      | A    | 0           | 148282.791   | -0.051                     | 332.0609  |
| 51   | 16     | 35     | 51    | 15      | 36      | E    | 0           | 148578.894   | 0.030                      | 387.2954  |
| 36   | 4      | 32     | 36    | 3       | 33      | E    | 0           | 148586.170   | -0.001                     | 200.6935  |
| 36   | 5      | 32     | 36    | 4       | 33      | E    | 0           | 148587.228   | 0.095                      | 200.6935  |
| 36   | 4      | 32     | 36    | 3       | 33      | A    | 0           | 148605.503   | 0.029                      | 200.6848  |
| 36   | 5      | 32     | 36    | 4       | 33      | A    | 0           | 148606.545   | 0.103                      | 200.6848  |
| 45   | 15     | 31     | 45    | 14      | 32      | E    | 0           | 148608.310   | 0.063                      | 320.2723  |
| 25   | 5      | 20     | 24    | 6       | 19      | A    | 0           | 148617.273   | 0.001                      | 136.6366  |
| 51   | 16     | 35     | 51    | 15      | 36      | A    | 0           | 148619.359   | -0.012                     | 387.2935  |
| 33   | 14     | 20     | 33    | 13      | 21      | E    | 0           | 148679.314   | 0.029                      | 215.5192  |
| 33   | 14     | 19     | 33    | 13      | 20      | E    | 0           | 148685.579   | -0.099                     | 215.5323  |
| 23   | 5      | 18     | 22    | 5       | 17      | E    | 0           | 149087.688   | -0.040                     | 126.2094  |
| 9    | 3      | 7      | 8     | 4       | 4       | A    | 0           | 14909.549    | -0.021                     | 77.7314   |
| 23   | 5      | 18     | 22    | 5       | 17      | A    | 0           | 149093.938   | 0.081                      | 126.1990  |
| 24   | 12     | 12     | 23    | 12      | 11      | A    | 0           | 149130.869   | 0.017                      | 151.5368  |
| 24   | 12     | 13     | 23    | 12      | 12      | E    | 0           | 149132.458   | 0.006                      | 151.5325  |
| 56   | 16     | 41     | 56    | 15      | 42      | E    | 0           | 149187.781   | -0.017                     | 444.8451  |
| 56   | 16     | 41     | 56    | 15      | 42      | A    | 0           | 149226.109   | -0.100                     | 444.8433  |
| 55   | 16     | 40     | 55    | 15      | 41      | E    | 0           | 149284.842   | -0.027                     | 432.8612  |
| 44   | 15     | 29     | 44    | 14      | 30      | A    | 0           | 149303.670   | 0.162                      | 310.7511  |
| 44   | 15     | 29     | 44    | 14      | 30      | E    | 0           | 149355.112   | -0.067                     | 310.7536  |
| 32   | 14     | 19     | 32    | 13      | 20      | E    | 0           | 149376.351   | 0.012                      | 208.6185  |
| 32   | 14     | 18     | 32    | 13      | 19      | E    | 0           | 149382.030   | -0.013                     | 208.6317  |
| 32   | 14     | 18     | 32    | 13      | 19      | A    | 0           | 149421.627   | 0.073                      | 208.6237  |
| 32   | 14     | 19     | 32    | 13      | 20      | A    | 0           | 149424.738   | -0.066                     | 208.6236  |
| 46   | 10     | 37     | 46    | 9       | 38      | E    | 0           | 149502.866   | -0.003                     | 307.5939  |
| 46   | 10     | 37     | 46    | 9       | 38      | A    | 0           | 149507.481   | -0.018                     | 307.5890  |
| 33   | 2      | 31     | 33    | 1       | 32      | A    | 1           | 149511.792   | -0.118                     | 299.8965  |
| 33   | 3      | 31     | 33    | 2       | 32      | A    | 1           | 149511.792   | -0.127                     | 299.8965  |
| 38   | 5      | 33     | 38    | 4       | 34      | E    | 0           | 149690.278   | 0.024                      | 219.9763  |
| 24   | 6      | 19     | 23    | 6       | 18      | E    | 0           | 149693.530   | 0.047                      | 131.6526  |
| 38   | 5      | 33     | 38    | 4       | 34      | E    | 1           | 149701.433   | -0.123                     | 348.2985  |
| 3    | 2      | 1      | 3     | 1       | 2       | E    | 0           | 14971.188    | 0.006                      | 68.7713   |
| 38   | 6      | 33     | 38    | 5       | 34      | A    | 0           | 149711.830   | 0.049                      | 219.9685  |
| 57   | 16     | 42     | 57    | 15      | 43      | E    | 0           | 149725.815   | -0.042                     | 457.0331  |
| 24   | 6      | 19     | 23    | 6       | 18      | E    | 1           | 149731.313   | -0.921                     | 259.9803  |
| 3    | 2      | 1      | 3     | 1       | 2       | A    | 0           | 14974.537    | -0.000                     | 68.7594   |
| 57   | 16     | 42     | 57    | 15      | 43      | A    | 0           | 149758.527   | -0.066                     | 457.0312  |
| 25   | 4      | 21     | 24    | 5       | 20      | A    | 1           | 149883.737   | 0.021                      | 262.6560  |
| 54   | 16     | 39     | 54    | 15      | 40      | E    | 0           | 149919.284   | 0.056                      | 421.0877  |



| $J'$ | $K'_a$ | $K'_c$ | $J''$ | $K''_a$ | $K''_c$ | Sym. | $v_{tCH_3}$ | $\nu_{Obs.}$ | $\nu_{Obs.} - \nu_{Calc.}$ | $E_{low}$ |
|------|--------|--------|-------|---------|---------|------|-------------|--------------|----------------------------|-----------|
| 25   | 4      | 21     | 24    | 5       | 20      | E    | 1           | 149941.829   | -0.018                     | 262.3474  |
| 54   | 16     | 39     | 54    | 15      | 40      | A    | 0           | 149968.548   | -0.038                     | 421.0861  |
| 25   | 4      | 21     | 24    | 5       | 20      | E    | 0           | 149973.701   | -0.012                     | 134.0156  |
| 25   | 4      | 21     | 24    | 5       | 20      | A    | 0           | 149974.808   | 0.023                      | 134.0060  |
| 31   | 14     | 18     | 31    | 13      | 19      | E    | 0           | 150001.911   | 0.010                      | 201.9367  |
| 31   | 14     | 17     | 31    | 13      | 18      | E    | 0           | 150006.911   | -0.044                     | 201.9500  |
| 55   | 14     | 42     | 55    | 13      | 43      | E    | 0           | 150015.364   | -0.026                     | 423.0373  |
| 55   | 14     | 42     | 55    | 13      | 43      | A    | 0           | 150019.785   | -0.107                     | 423.0347  |
| 44   | 8      | 36     | 44    | 7       | 37      | E    | 0           | 150036.843   | 0.008                      | 284.1370  |
| 44   | 8      | 36     | 44    | 7       | 37      | A    | 0           | 150043.196   | -0.134                     | 284.1315  |
| 31   | 14     | 17     | 31    | 13      | 18      | A    | 0           | 150047.483   | 0.119                      | 201.9420  |
| 31   | 14     | 18     | 31    | 13      | 19      | A    | 0           | 150048.680   | -0.112                     | 201.9419  |
| 24   | 10     | 14     | 23    | 10      | 13      | E    | 0           | 150099.940   | 0.031                      | 143.3203  |
| 24   | 10     | 15     | 23    | 10      | 14      | E    | 0           | 150101.923   | 0.037                      | 143.3080  |
| 24   | 10     | 14     | 23    | 10      | 13      | A    | 0           | 150104.652   | 0.057                      | 143.3092  |
| 44   | 15     | 30     | 44    | 14      | 31      | E    | 0           | 150136.088   | 0.015                      | 310.7143  |
| 44   | 9      | 36     | 44    | 8       | 37      | E    | 1           | 150176.083   | 0.077                      | 412.4505  |
| 33   | 2      | 31     | 33    | 1       | 32      | E    | 0           | 150194.133   | -0.003                     | 171.2387  |
| 33   | 3      | 31     | 33    | 2       | 32      | E    | 0           | 150194.133   | -0.013                     | 171.2387  |
| 33   | 2      | 31     | 33    | 1       | 32      | A    | 0           | 150218.863   | 0.122                      | 171.2281  |
| 33   | 3      | 31     | 33    | 2       | 32      | A    | 0           | 150218.863   | 0.112                      | 171.2281  |
| 9    | 2      | 8      | 8     | 3       | 5       | A    | 0           | 15025.827    | 0.310                      | 76.5054   |
| 44   | 15     | 30     | 44    | 14      | 31      | A    | 0           | 150289.382   | 0.036                      | 310.7139  |
| 44   | 9      | 36     | 44    | 8       | 37      | E    | 0           | 150300.482   | 0.033                      | 284.1379  |
| 44   | 9      | 36     | 44    | 8       | 37      | A    | 0           | 150308.145   | 0.008                      | 284.1324  |
| 9    | 2      | 8      | 8     | 3       | 5       | E    | 0           | 15031.380    | -0.031                     | 76.5167   |
| 33   | 2      | 31     | 33    | 1       | 32      | E    | 1           | 150315.341   | 0.005                      | 299.5577  |
| 33   | 3      | 31     | 33    | 2       | 32      | E    | 1           | 150315.341   | -0.006                     | 299.5577  |
| 40   | 6      | 34     | 40    | 5       | 35      | E    | 1           | 150324.815   | -0.049                     | 368.6385  |
| 40   | 7      | 34     | 40    | 6       | 35      | E    | 1           | 150346.625   | -0.081                     | 368.6386  |
| 40   | 6      | 34     | 40    | 5       | 35      | E    | 0           | 150356.511   | 0.091                      | 240.3181  |
| 40   | 6      | 34     | 40    | 5       | 35      | A    | 0           | 150370.261   | 0.034                      | 240.3111  |
| 40   | 7      | 34     | 40    | 6       | 35      | E    | 0           | 150377.012   | 0.003                      | 240.3182  |
| 40   | 7      | 34     | 40    | 6       | 35      | A    | 0           | 150390.887   | -0.031                     | 240.3112  |
| 42   | 7      | 35     | 42    | 6       | 36      | E    | 1           | 150432.332   | -0.058                     | 390.0260  |
| 57   | 15     | 43     | 57    | 14      | 44      | E    | 0           | 150468.337   | -0.090                     | 452.0140  |
| 57   | 15     | 43     | 57    | 14      | 44      | A    | 0           | 150479.727   | -0.075                     | 452.0118  |
| 6    | 2      | 4      | 6     | 1       | 5       | A    | 1           | 15051.737    | -0.021                     | 200.7143  |
| 42   | 7      | 35     | 42    | 6       | 36      | E    | 0           | 150512.947   | 0.008                      | 261.7087  |
| 42   | 8      | 35     | 42    | 7       | 36      | E    | 1           | 150514.896   | -0.053                     | 390.0262  |
| 42   | 7      | 35     | 42    | 6       | 36      | A    | 0           | 150523.407   | -0.028                     | 261.7025  |
| 30   | 14     | 17     | 30    | 13      | 18      | E    | 0           | 150562.798   | 0.047                      | 195.4726  |
| 30   | 14     | 16     | 30    | 13      | 17      | E    | 0           | 150567.212   | -0.007                     | 195.4860  |
| 42   | 8      | 35     | 42    | 7       | 36      | E    | 0           | 150590.678   | -0.156                     | 261.7089  |
| 54   | 12     | 42     | 54    | 11      | 43      | A    | 0           | 150593.515   | -0.129                     | 406.2240  |
| 42   | 8      | 35     | 42    | 7       | 36      | A    | 0           | 150601.671   | -0.029                     | 261.7027  |
| 54   | 12     | 42     | 54    | 11      | 43      | E    | 0           | 150614.540   | 0.022                      | 406.2270  |
| 53   | 13     | 41     | 53    | 12      | 42      | E    | 1           | 150628.810   | 0.383                      | 523.3273  |
| 25   | 5      | 21     | 24    | 5       | 20      | A    | 1           | 150659.730   | -0.023                     | 262.6560  |
| 26   | 3      | 23     | 25    | 4       | 22      | A    | 1           | 150694.358   | -0.125                     | 264.6040  |
| 26   | 4      | 23     | 25    | 4       | 22      | A    | 1           | 150725.345   | 0.038                      | 264.6040  |
| 26   | 3      | 23     | 25    | 3       | 22      | A    | 1           | 150752.209   | 0.024                      | 264.6021  |
| 26   | 4      | 23     | 25    | 3       | 22      | A    | 1           | 150782.984   | -0.025                     | 264.6021  |
| 26   | 3      | 23     | 25    | 4       | 22      | E    | 1           | 150791.500   | -0.040                     | 264.2885  |
| 25   | 5      | 21     | 24    | 5       | 20      | E    | 0           | 150792.939   | 0.043                      | 134.0156  |
| 25   | 5      | 21     | 24    | 5       | 20      | A    | 0           | 150796.487   | -0.025                     | 134.0060  |
| 26   | 3      | 23     | 25    | 4       | 22      | E    | 0           | 150808.919   | -0.027                     | 135.9568  |
| 26   | 3      | 23     | 25    | 4       | 22      | A    | 0           | 150811.903   | 0.012                      | 135.9470  |
| 27   | 2      | 25     | 26    | 3       | 24      | A    | 1           | 150821.890   | 0.015                      | 266.0777  |
| 27   | 3      | 25     | 26    | 2       | 24      | A    | 1           | 150823.997   | 0.088                      | 266.0776  |
| 26   | 4      | 23     | 25    | 4       | 22      | E    | 1           | 150825.619   | -0.082                     | 264.2885  |
| 24   | 9      | 16     | 23    | 9       | 15      | A    | 0           | 150840.324   | 0.040                      | 139.8159  |
| 26   | 4      | 23     | 25    | 4       | 22      | E    | 0           | 150841.826   | -0.057                     | 135.9568  |
| 26   | 4      | 23     | 25    | 4       | 22      | A    | 0           | 150844.910   | -0.043                     | 135.9470  |
| 26   | 3      | 23     | 25    | 3       | 22      | E    | 1           | 150855.068   | -0.023                     | 264.2864  |
| 26   | 3      | 23     | 25    | 3       | 22      | E    | 0           | 150870.391   | -0.006                     | 135.9548  |
| 26   | 3      | 23     | 25    | 3       | 22      | A    | 0           | 150873.533   | -0.030                     | 135.9449  |
| 24   | 9      | 16     | 23    | 9       | 15      | E    | 0           | 150878.027   | 0.066                      | 139.8183  |
| 26   | 4      | 23     | 25    | 3       | 22      | E    | 1           | 150889.234   | -0.017                     | 264.2864  |
| 27   | 2      | 25     | 26    | 3       | 24      | E    | 1           | 150892.829   | -0.064                     | 265.7493  |
| 27   | 3      | 25     | 26    | 2       | 24      | E    | 1           | 150895.048   | -0.135                     | 265.7493  |
| 26   | 4      | 23     | 25    | 3       | 22      | E    | 0           | 150903.329   | -0.005                     | 135.9548  |
| 26   | 4      | 23     | 25    | 3       | 22      | A    | 0           | 150906.630   | 0.004                      | 135.9449  |
| 27   | 2      | 25     | 26    | 3       | 24      | E    | 0           | 150916.057   | -0.044                     | 137.4198  |
| 27   | 3      | 25     | 26    | 2       | 24      | A    | 0           | 150920.475   | -0.007                     | 137.4095  |
| 53   | 16     | 38     | 53    | 15      | 39      | E    | 0           | 150977.720   | -0.023                     | 409.5304  |
| 28   | 1      | 27     | 27    | 1       | 26      | A    | 1           | 151000.394   | -0.011                     | 267.1099  |
| 28   | 1      | 27     | 27    | 2       | 26      | A    | 1           | 151000.394   | 0.005                      | 267.1099  |
| 28   | 2      | 27     | 27    | 1       | 26      | A    | 1           | 151000.394   | -0.019                     | 267.1099  |
| 28   | 2      | 27     | 27    | 2       | 26      | A    | 1           | 151000.394   | -0.002                     | 267.1099  |
| 28   | 1      | 27     | 27    | 1       | 26      | E    | 1           | 151042.633   | -0.033                     | 266.7627  |
| 28   | 1      | 27     | 27    | 2       | 26      | E    | 1           | 151042.633   | -0.014                     | 266.7627  |
| 28   | 2      | 27     | 27    | 1       | 26      | E    | 1           | 151042.633   | -0.042                     | 266.7627  |
| 28   | 2      | 27     | 27    | 2       | 26      | E    | 1           | 151042.633   | -0.023                     | 266.7627  |
| 56   | 17     | 39     | 56    | 16      | 40      | E    | 0           | 151062.675   | -0.024                     | 450.2064  |
| 29   | 14     | 16     | 29    | 13      | 17      | E    | 0           | 151064.887   | 0.001                      | 189.2253  |
| 29   | 14     | 15     | 29    | 13      | 16      | E    | 0           | 151068.787   | -0.047                     | 189.2387  |
| 28   | 1      | 27     | 27    | 1       | 26      | E    | 0           | 151072.338   | 0.008                      | 138.4370  |
| 28   | 2      | 27     | 27    | 2       | 26      | E    | 0           | 151072.338   | 0.018                      | 138.4370  |
| 28   | 1      | 27     | 27    | 1       | 26      | A    | 0           | 151073.592   | -0.035                     | 138.4262  |
| 28   | 1      | 27     | 27    | 2       | 26      | A    | 0           | 151073.592   | -0.017                     | 138.4262  |
| 28   | 2      | 27     | 27    | 1       | 26      | A    | 0           | 151073.592   | -0.044                     | 138.4262  |
| 28   | 2      | 27     | 27    | 2       | 26      | A    | 0           | 151073.592   | -0.026                     | 138.4262  |
| 29   | 14     | 15     | 29    | 13      | 16      | A    | 0           | 151109.948   | 0.129                      | 189.2307  |
| 29   | 14     | 16     | 29    | 13      | 17      | A    | 0           | 151109.948   | -0.118                     | 189.2307  |
| 25   | 4      | 21     | 24    | 4       | 20      | A    | 1           | 151206.629   | 0.081                      | 262.6119  |
| 29   | 0      | 29     | 28    | 0       | 28      | A    | 1           | 151211.761   | 0.055                      | 267.7261  |
| 29   | 0      | 29     | 28    | 1       | 28      | A    | 1           | 151211.761   | 0.055                      | 267.7261  |
| 29   | 1      | 29     | 28    | 0       | 28      | A    | 1           | 151211.761   | 0.054                      | 267.7261  |
| 29   | 1      | 29     | 28    | 1       | 28      | A    | 1           | 151211.761   | 0.055                      | 267.7261  |
| 29   | 0      | 29     | 28    | 0       | 28      | E    | 1           | 151224.096   | -0.026                     | 267.3543  |
| 29   | 0      | 29     | 28    | 1       | 28      | E    | 1           | 151224.096   | -0.026                     | 267.3543  |
| 29   | 1      | 29     | 28    | 0       | 28      | E    | 1           | 151224.096   | -0.026                     | 267.3543  |
| 29   | 1      | 29     | 28    | 1       | 28      | E    | 1           | 151224.096   | -0.026                     | 267.3543  |
| 29   | 0      | 29     | 28    | 0       | 28      | A    | 0           | 151260.601   | -0.208                     | 139.0226  |
| 29   | 0      | 29     | 28    | 1       | 28      | A    | 0           | 151260.601   | -0.208                     | 139.0226  |
| 29   | 1      | 29     | 28    | 0       | 28      | A    | 0           | 151260.601   | -0.208                     | 139.0226  |
| 29   | 1      | 29     | 28    | 1       | 28      | A    | 0           | 151260.601   | -0.208                     | 139.0226  |
| 29   | 0      | 29     | 28    | 0       | 28      | E    | 0           | 151260.601   | 0.178                      | 139.0341  |
| 29   | 1      | 29     | 28    | 1       | 28      | E    | 0           | 151260.601   | 0.178                      | 139.0341  |
| 35   | 3      | 32     | 35    | 2       | 33      | A    | 1           | 151434.564   | 0.163                      | 317.5098  |
| 35   | 4      | 32     | 35    | 3       | 33      | A    | 1           | 151434.564   | 0.090                      | 317.5098  |
| 28   | 14     | 15     | 28    | 13      | 16      | E    | 0           | 151513.677   | 0.021                      | 183.1939  |
| 28   | 14     | 14     | 28    | 13      | 15      | E    | 0           | 151517.107   | -0.037                     | 183.2073  |
| 57   | 13     | 44     | 57    | 12      | 45      | E    | 0           | 151522.874   | -0.121                     | 446.6141  |
| 28   | 14     | 15     | 28    | 13      | 16      | A    | 0           | 151558.254   | -0.039                     | 183.1994  |



| $J'$ | $K'_a$ | $K'_c$ | $J''$ | $K''_a$ | $K''_c$ | Sym. | $v_{tCH_3}$ | $\nu_{Obs.}$ | $\nu_{Obs.} - \nu_{Calc.}$ | $E_{low}$ |
|------|--------|--------|-------|---------|---------|------|-------------|--------------|----------------------------|-----------|
| 6    | 2      | 4      | 6     | 1       | 5       | E    | 0           | 15156.518    | -0.009                     | 71.9989   |
| 6    | 2      | 4      | 6     | 1       | 5       | A    | 0           | 15160.899    | 0.047                      | 71.9871   |
| 24   | 8      | 17     | 23    | 8       | 16      | E    | 0           | 151657.735   | 0.000                      | 136.7590  |
| 24   | 7      | 18     | 23    | 7       | 17      | A    | 0           | 151691.823   | -0.087                     | 134.0836  |
| 24   | 7      | 18     | 23    | 7       | 17      | E    | 0           | 151692.867   | 0.073                      | 134.0922  |
| 4    | 2      | 2      | 4     | 1       | 3       | E    | 1           | 15176.867    | 0.190                      | 197.9806  |
| 43   | 15     | 29     | 43    | 14      | 30      | A    | 0           | 151764.834   | -0.030                     | 301.3856  |
| 27   | 14     | 14     | 27    | 13      | 15      | E    | 0           | 151913.773   | -0.092                     | 177.3774  |
| 27   | 14     | 13     | 27    | 13      | 14      | E    | 0           | 151916.973   | 0.030                      | 177.3909  |
| 15   | 6      | 10     | 14    | 5       | 9       | E    | 0           | 151922.304   | -0.052                     | 93.8827   |
| 27   | 14     | 13     | 27    | 13      | 14      | A    | 0           | 151958.031   | 0.011                      | 177.3830  |
| 15   | 6      | 10     | 14    | 5       | 9       | A    | 0           | 151980.682   | 0.002                      | 93.8724   |
| 25   | 5      | 21     | 24    | 4       | 20      | A    | 1           | 151982.664   | 0.079                      | 262.6119  |
| 35   | 3      | 32     | 35    | 2       | 33      | E    | 0           | 152076.924   | 0.106                      | 188.8816  |
| 35   | 4      | 32     | 35    | 3       | 33      | E    | 0           | 152076.924   | 0.026                      | 188.8816  |
| 23   | 6      | 17     | 22    | 6       | 16      | A    | 0           | 152082.621   | 0.030                      | 127.6250  |
| 23   | 6      | 17     | 22    | 6       | 16      | E    | 0           | 152083.752   | -0.018                     | 127.6351  |
| 35   | 3      | 32     | 35    | 2       | 33      | A    | 0           | 152099.358   | 0.094                      | 188.8720  |
| 35   | 4      | 32     | 35    | 3       | 33      | A    | 0           | 152099.358   | 0.012                      | 188.8720  |
| 35   | 3      | 32     | 35    | 2       | 33      | E    | 1           | 152165.601   | -0.075                     | 317.2024  |
| 35   | 4      | 32     | 35    | 3       | 33      | E    | 1           | 152165.601   | -0.161                     | 317.2024  |
| 25   | 5      | 21     | 24    | 4       | 20      | E    | 0           | 152184.274   | -0.007                     | 133.9692  |
| 32   | 1      | 31     | 32    | 0       | 32      | A    | 1           | 152188.002   | -0.308                     | 288.9281  |
| 32   | 2      | 31     | 32    | 1       | 32      | A    | 1           | 152188.002   | -0.308                     | 288.9281  |
| 25   | 5      | 21     | 24    | 4       | 20      | A    | 0           | 152191.943   | 0.020                      | 133.9595  |
| 25   | 5      | 21     | 24    | 4       | 20      | E    | 1           | 152209.248   | -0.042                     | 262.2999  |
| 26   | 14     | 13     | 26    | 13      | 14      | E    | 0           | 152269.885   | 0.035                      | 171.7752  |
| 26   | 14     | 12     | 26    | 13      | 13      | E    | 0           | 152272.517   | -0.052                     | 171.7887  |
| 50   | 16     | 34     | 50    | 15      | 35      | E    | 0           | 152280.969   | -0.089                     | 376.3311  |
| 50   | 16     | 34     | 50    | 15      | 35      | A    | 0           | 152298.523   | 0.006                      | 376.3295  |
| 26   | 14     | 13     | 26    | 13      | 14      | A    | 0           | 152313.676   | 0.014                      | 171.7808  |
| 52   | 16     | 37     | 52    | 15      | 38      | E    | 0           | 152343.138   | 0.004                      | 398.1942  |
| 52   | 16     | 37     | 52    | 15      | 38      | A    | 0           | 152406.571   | -0.045                     | 398.1930  |
| 49   | 10     | 39     | 49    | 9       | 40      | A    | 0           | 152462.026   | -0.043                     | 342.0490  |
| 49   | 10     | 39     | 49    | 9       | 40      | E    | 0           | 152465.465   | -0.014                     | 342.0531  |
| 9    | 9      | 0      | 8     | 8       | 0       | E    | 0           | 152526.214   | -0.003                     | 86.8551   |
| 9    | 9      | 1      | 8     | 8       | 0       | A    | 0           | 152547.157   | 0.002                      | 86.8424   |
| 9    | 9      | 0      | 8     | 8       | 1       | A    | 0           | 152547.157   | 0.002                      | 86.8424   |
| 25   | 14     | 12     | 25    | 13      | 13      | E    | 0           | 152585.580   | 0.019                      | 166.3864  |
| 25   | 14     | 11     | 25    | 13      | 12      | E    | 0           | 152587.922   | -0.040                     | 166.3999  |
| 25   | 14     | 11     | 25    | 13      | 12      | A    | 0           | 152629.034   | -0.004                     | 166.3921  |
| 47   | 14     | 34     | 46    | 15      | 31      | E    | 0           | 152635.842   | 0.044                      | 334.9836  |
| 24   | 8      | 16     | 23    | 8       | 15      | E    | 0           | 152735.144   | 0.033                      | 136.8034  |
| 24   | 8      | 16     | 23    | 8       | 15      | A    | 0           | 152739.180   | -0.128                     | 136.7951  |
| 42   | 15     | 27     | 42    | 14      | 28      | A    | 0           | 152837.815   | 0.003                      | 292.2974  |
| 24   | 14     | 11     | 24    | 13      | 12      | E    | 0           | 152864.639   | 0.036                      | 161.2103  |
| 24   | 14     | 10     | 24    | 13      | 11      | E    | 0           | 152866.691   | -0.034                     | 161.2239  |
| 42   | 15     | 27     | 42    | 14      | 28      | E    | 0           | 152881.112   | -0.065                     | 292.3013  |
| 24   | 14     | 10     | 24    | 13      | 11      | A    | 0           | 152907.804   | 0.012                      | 161.2160  |
| 24   | 14     | 11     | 24    | 13      | 12      | A    | 0           | 152907.804   | 0.011                      | 161.2160  |
| 32   | 1      | 31     | 32    | 0       | 32      | E    | 0           | 152930.712   | 0.071                      | 160.2428  |
| 32   | 2      | 31     | 32    | 1       | 32      | E    | 0           | 152930.712   | 0.071                      | 160.2428  |
| 32   | 1      | 31     | 32    | 0       | 32      | A    | 0           | 152958.135   | 0.048                      | 160.2313  |
| 32   | 2      | 31     | 32    | 1       | 32      | A    | 0           | 152958.135   | 0.048                      | 160.2313  |
| 59   | 16     | 44     | 59    | 15      | 45      | E    | 0           | 152962.372   | -0.027                     | 481.9951  |
| 59   | 16     | 44     | 59    | 15      | 45      | A    | 0           | 152983.265   | -0.076                     | 481.9934  |
| 42   | 15     | 28     | 42    | 14      | 29      | E    | 0           | 153007.207   | 0.029                      | 292.2843  |
| 32   | 1      | 31     | 32    | 0       | 32      | E    | 1           | 153086.420   | 0.005                      | 288.5579  |
| 32   | 2      | 31     | 32    | 1       | 32      | E    | 1           | 153086.420   | 0.004                      | 288.5579  |
| 23   | 14     | 10     | 23    | 13      | 11      | E    | 0           | 153110.315   | 0.030                      | 156.2462  |
| 23   | 14     | 9      | 23    | 13      | 10      | E    | 0           | 153112.110   | -0.053                     | 156.2598  |
| 42   | 15     | 28     | 42    | 14      | 29      | A    | 0           | 153147.595   | -0.055                     | 292.2859  |
| 23   | 14     | 9      | 23    | 13      | 10      | A    | 0           | 153153.233   | 0.012                      | 156.2520  |
| 23   | 14     | 10     | 23    | 13      | 11      | A    | 0           | 153153.233   | 0.011                      | 156.2520  |
| 49   | 15     | 35     | 48    | 16      | 32      | A    | 0           | 153271.790   | -0.035                     | 360.4326  |
| 22   | 14     | 9      | 22    | 13      | 10      | E    | 0           | 153325.686   | 0.025                      | 151.4935  |
| 22   | 14     | 8      | 22    | 13      | 9       | E    | 0           | 153327.297   | -0.027                     | 151.5072  |
| 11   | 8      | 4      | 10    | 7       | 4       | E    | 0           | 153343.101   | -0.012                     | 87.8967   |
| 22   | 14     | 8      | 22    | 13      | 9       | A    | 0           | 153368.381   | 0.006                      | 151.4993  |
| 22   | 14     | 9      | 22    | 13      | 10      | A    | 0           | 153368.381   | 0.006                      | 151.4993  |
| 11   | 8      | 3      | 10    | 7       | 3       | E    | 0           | 153374.091   | -0.055                     | 87.9066   |
| 11   | 8      | 3      | 10    | 7       | 4       | A    | 0           | 153389.952   | -0.020                     | 87.8934   |
| 21   | 14     | 8      | 21    | 13      | 9       | E    | 0           | 153513.664   | 0.112                      | 146.9516  |
| 21   | 14     | 7      | 21    | 13      | 8       | E    | 0           | 153514.951   | -0.078                     | 146.9653  |
| 21   | 14     | 7      | 21    | 13      | 8       | A    | 0           | 153556.081   | 0.012                      | 146.9575  |
| 21   | 14     | 8      | 21    | 13      | 9       | A    | 0           | 153556.081   | 0.012                      | 146.9575  |
| 29   | 7      | 22     | 28    | 8       | 21      | A    | 0           | 153650.852   | -0.026                     | 164.2143  |
| 20   | 14     | 7      | 20    | 13      | 8       | E    | 0           | 153676.613   | 0.040                      | 142.6200  |
| 20   | 14     | 6      | 20    | 13      | 7       | E    | 0           | 153677.835   | -0.056                     | 142.6336  |
| 24   | 5      | 19     | 23    | 5       | 18      | A    | 1           | 153700.390   | 0.053                      | 259.8319  |
| 29   | 7      | 22     | 28    | 8       | 21      | E    | 0           | 153702.362   | 0.044                      | 164.2221  |
| 20   | 14     | 6      | 20    | 13      | 7       | A    | 0           | 153718.954   | 0.034                      | 142.6258  |
| 20   | 14     | 7      | 20    | 13      | 8       | A    | 0           | 153718.954   | 0.034                      | 142.6258  |
| 19   | 14     | 6      | 19    | 13      | 7       | E    | 0           | 153817.143   | -0.015                     | 138.4980  |
| 19   | 14     | 5      | 19    | 13      | 6       | E    | 0           | 153818.283   | -0.054                     | 138.5117  |
| 49   | 11     | 39     | 49    | 10      | 40      | E    | 0           | 153857.984   | 0.011                      | 342.0594  |
| 19   | 14     | 5      | 19    | 13      | 6       | A    | 0           | 153859.309   | -0.047                     | 138.5039  |
| 19   | 14     | 6      | 19    | 13      | 7       | A    | 0           | 153859.309   | -0.047                     | 138.5039  |
| 49   | 11     | 39     | 49    | 10      | 40      | A    | 0           | 153860.372   | 0.022                      | 342.0553  |
| 51   | 16     | 36     | 51    | 15      | 37      | E    | 0           | 153903.992   | 0.028                      | 387.0830  |
| 24   | 5      | 19     | 23    | 5       | 18      | E    | 0           | 153910.574   | -0.003                     | 131.1825  |
| 24   | 5      | 19     | 23    | 5       | 18      | A    | 0           | 153918.063   | 0.045                      | 131.1723  |
| 18   | 14     | 5      | 18    | 13      | 6       | E    | 0           | 153937.524   | -0.045                     | 134.5852  |
| 18   | 14     | 4      | 18    | 13      | 5       | E    | 0           | 153938.574   | -0.056                     | 134.5989  |
| 51   | 16     | 36     | 51    | 15      | 37      | A    | 0           | 153979.527   | 0.120                      | 387.0820  |
| 13   | 7      | 7      | 12    | 6       | 7       | E    | 0           | 153992.965   | 0.017                      | 90.1973   |
| 13   | 7      | 6      | 12    | 6       | 7       | A    | 0           | 154059.165   | 0.041                      | 90.1918   |
| 17   | 14     | 3      | 17    | 13      | 4       | A    | 0           | 154081.865   | -0.007                     | 130.8870  |
| 17   | 14     | 4      | 17    | 13      | 5       | A    | 0           | 154081.865   | -0.007                     | 130.8870  |
| 57   | 19     | 39     | 56    | 20      | 36      | A    | 0           | 154146.636   | 0.075                      | 474.3488  |
| 16   | 14     | 2      | 16    | 13      | 3       | A    | 0           | 154168.121   | 0.099                      | 127.3912  |
| 16   | 14     | 3      | 16    | 13      | 4       | A    | 0           | 154168.121   | 0.099                      | 127.3912  |
| 27   | 6      | 21     | 26    | 7       | 20      | A    | 0           | 154188.410   | 0.016                      | 149.8761  |
| 27   | 6      | 21     | 26    | 7       | 20      | E    | 0           | 154219.239   | -0.016                     | 149.8846  |
| 41   | 15     | 26     | 41    | 14      | 27      | A    | 0           | 154261.233   | -0.005                     | 283.4200  |
| 41   | 15     | 26     | 41    | 14      | 27      | E    | 0           | 154279.096   | -0.077                     | 283.4249  |
| 41   | 15     | 27     | 41    | 14      | 28      | E    | 0           | 154315.246   | 0.057                      | 283.4109  |
| 47   | 9      | 38     | 47    | 8       | 39      | E    | 1           | 154335.998   | 0.031                      | 445.3709  |
| 6    | 2      | 4      | 6     | 1       | 5       | E    | 1           | 15438.553    | 0.015                      | 200.3354  |
| 41   | 15     | 27     | 41    | 14      | 28      | A    | 0           | 154428.408   | -0.063                     | 283.4139  |
| 34   | 2      | 32     | 34    | 1       | 33      | A    | 1           | 154443.095   | -0.023                     | 305.9596  |
| 34   | 3      | 32     | 34    | 2       | 33      | A    | 1           | 154443.095   | -0.027                     | 305.9596  |
| 58   | 15     | 44     | 58    | 14      | 45      | E    | 0           | 154448.842   | 0.030                      | 464.2667  |
| 58   | 15     | 44     | 58    | 14      | 45      | A    | 0           | 154455.521   | -0.055                     | 464.2647  |
| 47   | 9      | 38     | 47    | 8       | 39      | E    | 0           | 154534.418   | -0.001                     | 317.0661  |
| 47   | 9      | 38     | 47    | 8       | 39      | A    | 0           | 154537.389   | -0.072                     | 317.0615  |



| $J'$ | $K'_a$ | $K'_c$ | $J''$ | $K''_a$ | $K''_c$ | Sym. | $v_{tCH_3}$ | $\nu_{Obs.}$ | $\nu_{Obs.} - \nu_{Calc.}$ | $E_{low}$ |
|------|--------|--------|-------|---------|---------|------|-------------|--------------|----------------------------|-----------|
| 39   | 5      | 34     | 39    | 4       | 35      | E    | 0           | 154785.453   | 0.039                      | 227.3956  |
| 39   | 6      | 34     | 39    | 5       | 35      | E    | 0           | 154788.034   | 0.062                      | 227.3956  |
| 39   | 5      | 34     | 39    | 4       | 35      | E    | 1           | 154800.533   | -0.075                     | 355.7166  |
| 39   | 5      | 34     | 39    | 4       | 35      | A    | 0           | 154803.022   | 0.142                      | 227.3878  |
| 39   | 6      | 34     | 39    | 5       | 35      | A    | 0           | 154805.479   | 0.029                      | 227.3878  |
| 25   | 14     | 11     | 24    | 14      | 10      | A    | 0           | 154895.616   | -0.062                     | 166.3165  |
| 25   | 14     | 12     | 24    | 14      | 11      | A    | 0           | 154895.616   | -0.062                     | 166.3165  |
| 25   | 14     | 12     | 24    | 14      | 11      | E    | 0           | 154896.973   | 0.121                      | 166.3093  |
| 47   | 10     | 38     | 47    | 9       | 39      | E    | 0           | 155020.152   | -0.036                     | 317.0679  |
| 47   | 10     | 38     | 47    | 9       | 39      | A    | 0           | 155025.351   | -0.045                     | 317.0633  |
| 25   | 6      | 20     | 24    | 6       | 19      | A    | 1           | 155130.890   | 0.060                      | 265.2759  |
| 34   | 2      | 32     | 34    | 1       | 33      | E    | 0           | 155148.324   | 0.029                      | 177.3044  |
| 34   | 3      | 32     | 34    | 2       | 33      | E    | 0           | 155148.324   | 0.024                      | 177.3044  |
| 25   | 6      | 20     | 24    | 6       | 19      | E    | 0           | 155258.082   | 0.028                      | 136.6458  |
| 25   | 6      | 20     | 24    | 6       | 19      | A    | 0           | 155260.817   | -0.001                     | 136.6366  |
| 34   | 2      | 32     | 34    | 1       | 33      | E    | 1           | 155273.827   | -0.037                     | 305.6222  |
| 34   | 3      | 32     | 34    | 2       | 33      | E    | 1           | 155273.827   | -0.042                     | 305.6222  |
| 49   | 16     | 33     | 49    | 15      | 34      | A    | 0           | 155317.277   | -0.033                     | 365.6238  |
| 15   | 6      | 9      | 14    | 5       | 10      | A    | 0           | 155323.342   | 0.055                      | 93.7793   |
| 49   | 16     | 33     | 49    | 15      | 34      | E    | 0           | 155328.528   | -0.077                     | 365.6252  |
| 15   | 6      | 9      | 14    | 5       | 10      | E    | 0           | 155331.642   | 0.017                      | 93.7892   |
| 26   | 4      | 22     | 25    | 5       | 21      | A    | 1           | 155368.036   | 0.030                      | 267.6815  |
| 45   | 8      | 37     | 45    | 7       | 38      | E    | 1           | 155418.684   | -0.084                     | 421.4055  |
| 26   | 4      | 22     | 25    | 5       | 21      | E    | 1           | 155452.722   | 0.011                      | 267.3770  |
| 26   | 4      | 22     | 25    | 5       | 21      | E    | 0           | 155478.201   | 0.010                      | 139.0455  |
| 26   | 4      | 22     | 25    | 5       | 21      | A    | 0           | 155480.366   | -0.010                     | 139.0361  |
| 40   | 15     | 25     | 40    | 14      | 26      | E    | 0           | 155511.147   | -0.006                     | 274.7772  |
| 41   | 6      | 35     | 41    | 5       | 36      | E    | 1           | 155514.550   | -0.057                     | 376.5672  |
| 41   | 7      | 35     | 41    | 6       | 36      | E    | 1           | 155526.630   | -0.006                     | 376.5672  |
| 25   | 12     | 14     | 24    | 12      | 13      | A    | 0           | 155530.770   | 0.035                      | 156.5112  |
| 25   | 12     | 14     | 24    | 12      | 13      | E    | 0           | 155532.619   | 0.002                      | 156.5070  |
| 41   | 6      | 35     | 41    | 5       | 36      | E    | 0           | 155541.563   | 0.015                      | 248.2479  |
| 45   | 8      | 37     | 45    | 7       | 38      | E    | 0           | 155547.849   | -0.022                     | 293.0942  |
| 41   | 7      | 35     | 41    | 6       | 36      | E    | 0           | 155552.823   | -0.032                     | 248.2480  |
| 45   | 8      | 37     | 45    | 7       | 38      | A    | 0           | 155555.499   | -0.068                     | 293.0889  |
| 41   | 6      | 35     | 41    | 5       | 36      | A    | 0           | 155556.226   | 0.074                      | 248.2411  |
| 41   | 7      | 35     | 41    | 6       | 36      | A    | 0           | 155567.477   | -0.040                     | 248.2411  |
| 45   | 9      | 37     | 45    | 8       | 38      | E    | 1           | 155582.096   | -0.047                     | 421.4061  |
| 40   | 15     | 26     | 40    | 14      | 27      | A    | 0           | 155605.402   | -0.031                     | 274.7682  |
| 52   | 11     | 41     | 52    | 10      | 42      | A    | 0           | 155641.668   | -0.093                     | 378.7271  |
| 52   | 11     | 41     | 52    | 10      | 42      | E    | 0           | 155650.599   | -0.108                     | 378.7304  |
| 50   | 16     | 35     | 50    | 15      | 36      | A    | 0           | 155656.551   | -0.027                     | 376.1988  |
| 45   | 9      | 37     | 45    | 8       | 38      | A    | 0           | 155710.120   | -0.070                     | 293.0894  |
| 60   | 16     | 45     | 60    | 15      | 46      | A    | 0           | 155715.780   | -0.074                     | 494.7551  |
| 43   | 7      | 36     | 43    | 6       | 37      | E    | 1           | 155753.006   | -0.078                     | 398.4671  |
| 43   | 8      | 36     | 43    | 7       | 37      | E    | 1           | 155759.957   | 0.014                      | 398.4672  |
| 26   | 5      | 22     | 25    | 5       | 21      | A    | 1           | 155814.636   | 0.033                      | 267.6815  |
| 27   | 3      | 24     | 26    | 4       | 23      | A    | 1           | 155823.949   | 0.028                      | 269.6317  |
| 43   | 7      | 36     | 43    | 6       | 37      | E    | 0           | 155827.167   | 0.007                      | 270.1510  |
| 43   | 7      | 36     | 43    | 6       | 37      | A    | 0           | 155838.581   | 0.011                      | 270.1449  |
| 27   | 4      | 24     | 26    | 4       | 23      | A    | 1           | 155840.240   | 0.025                      | 269.6317  |
| 27   | 3      | 24     | 26    | 3       | 23      | A    | 1           | 155854.740   | -0.003                     | 269.6306  |
| 27   | 4      | 24     | 26    | 3       | 23      | A    | 1           | 155871.146   | 0.107                      | 269.6306  |
| 43   | 8      | 36     | 43    | 7       | 37      | A    | 0           | 155882.854   | -0.016                     | 270.1451  |
| 27   | 3      | 24     | 26    | 4       | 23      | E    | 1           | 155921.812   | -0.001                     | 269.3195  |
| 27   | 3      | 24     | 26    | 4       | 23      | E    | 0           | 155940.349   | -0.022                     | 140.9884  |
| 27   | 3      | 24     | 26    | 4       | 23      | A    | 0           | 155943.353   | -0.003                     | 140.9786  |
| 28   | 2      | 26     | 27    | 3       | 25      | A    | 1           | 155946.263   | 0.002                      | 271.1086  |
| 28   | 3      | 26     | 27    | 2       | 25      | A    | 1           | 155947.289   | 0.013                      | 271.1086  |
| 26   | 5      | 22     | 25    | 5       | 21      | E    | 0           | 155951.236   | -0.026                     | 139.0455  |
| 26   | 5      | 22     | 25    | 5       | 21      | A    | 0           | 155954.957   | -0.056                     | 139.0361  |
| 27   | 3      | 24     | 26    | 3       | 23      | E    | 1           | 155956.047   | 0.073                      | 269.3183  |
| 27   | 4      | 24     | 26    | 4       | 23      | E    | 0           | 155957.844   | 0.001                      | 140.9884  |
| 27   | 4      | 24     | 26    | 4       | 23      | A    | 0           | 155960.878   | -0.020                     | 140.9786  |
| 27   | 3      | 24     | 26    | 3       | 23      | E    | 0           | 155973.199   | -0.109                     | 140.9873  |
| 27   | 4      | 24     | 26    | 3       | 23      | E    | 1           | 155974.231   | 0.084                      | 269.3183  |
| 27   | 3      | 24     | 26    | 3       | 23      | A    | 0           | 155976.407   | -0.011                     | 140.9775  |
| 27   | 4      | 24     | 26    | 3       | 23      | E    | 0           | 155990.828   | 0.047                      | 140.9873  |
| 27   | 4      | 24     | 26    | 3       | 23      | A    | 0           | 155993.996   | 0.035                      | 140.9775  |
| 25   | 11     | 15     | 24    | 11      | 14      | A    | 0           | 155999.156   | 0.055                      | 152.2080  |
| 25   | 11     | 14     | 24    | 11      | 13      | A    | 0           | 156000.461   | -0.164                     | 152.2080  |
| 25   | 11     | 14     | 24    | 11      | 13      | E    | 0           | 156000.461   | 0.064                      | 152.2183  |
| 25   | 11     | 15     | 24    | 11      | 14      | E    | 0           | 156002.204   | -0.025                     | 152.2054  |
| 28   | 2      | 26     | 27    | 3       | 25      | E    | 0           | 156041.663   | 0.018                      | 142.4538  |
| 28   | 3      | 26     | 27    | 3       | 25      | E    | 0           | 156041.663   | -0.348                     | 142.4538  |
| 28   | 2      | 26     | 27    | 2       | 25      | E    | 0           | 156042.705   | 0.327                      | 142.4538  |
| 28   | 3      | 26     | 27    | 2       | 25      | E    | 0           | 156042.705   | -0.038                     | 142.4538  |
| 28   | 2      | 26     | 27    | 3       | 25      | A    | 0           | 156043.837   | 0.025                      | 142.4437  |
| 28   | 3      | 26     | 27    | 2       | 25      | A    | 0           | 156044.890   | -0.025                     | 142.4436  |
| 16   | 6      | 11     | 15    | 5       | 10      | A    | 0           | 156061.256   | 0.002                      | 97.0846   |
| 29   | 1      | 28     | 28    | 1       | 27      | A    | 1           | 156128.148   | 0.009                      | 272.1468  |
| 29   | 1      | 28     | 28    | 2       | 27      | A    | 1           | 156128.148   | 0.017                      | 272.1468  |
| 29   | 2      | 28     | 28    | 1       | 27      | A    | 1           | 156128.148   | 0.005                      | 272.1468  |
| 29   | 2      | 28     | 28    | 2       | 27      | A    | 1           | 156128.148   | 0.013                      | 272.1468  |
| 26   | 4      | 22     | 25    | 4       | 21      | A    | 1           | 156144.119   | 0.075                      | 267.6556  |
| 29   | 1      | 28     | 28    | 1       | 27      | E    | 1           | 156170.177   | -0.056                     | 271.8009  |
| 29   | 1      | 28     | 28    | 2       | 27      | E    | 1           | 156170.177   | -0.047                     | 271.8009  |
| 29   | 2      | 28     | 28    | 1       | 27      | E    | 1           | 156170.177   | -0.060                     | 271.8009  |
| 29   | 2      | 28     | 28    | 2       | 27      | E    | 1           | 156170.177   | -0.051                     | 271.8009  |
| 29   | 1      | 28     | 28    | 1       | 27      | E    | 0           | 156201.319   | 0.009                      | 143.4763  |
| 29   | 2      | 28     | 28    | 2       | 27      | E    | 0           | 156201.319   | 0.014                      | 143.4763  |
| 29   | 1      | 28     | 28    | 1       | 27      | A    | 0           | 156202.554   | -0.048                     | 143.4655  |
| 29   | 1      | 28     | 28    | 2       | 27      | A    | 0           | 156202.554   | -0.039                     | 143.4655  |
| 29   | 2      | 28     | 28    | 1       | 27      | A    | 0           | 156202.554   | -0.052                     | 143.4655  |
| 29   | 2      | 28     | 28    | 2       | 27      | A    | 0           | 156202.554   | -0.043                     | 143.4655  |
| 26   | 4      | 22     | 25    | 4       | 21      | E    | 1           | 156294.703   | -0.006                     | 267.3490  |
| 30   | 0      | 30     | 29    | 0       | 29      | A    | 1           | 156340.297   | 0.030                      | 272.7700  |
| 30   | 0      | 30     | 29    | 1       | 29      | A    | 1           | 156340.297   | 0.030                      | 272.7700  |
| 30   | 1      | 30     | 29    | 0       | 29      | A    | 1           | 156340.297   | 0.030                      | 272.7700  |
| 30   | 1      | 30     | 29    | 1       | 29      | A    | 1           | 156340.297   | 0.030                      | 272.7700  |
| 30   | 0      | 30     | 29    | 0       | 29      | E    | 1           | 156352.546   | -0.035                     | 272.3986  |
| 30   | 1      | 30     | 29    | 1       | 29      | E    | 1           | 156352.546   | -0.035                     | 272.3986  |
| 30   | 0      | 30     | 29    | 0       | 29      | A    | 0           | 156390.427   | -0.197                     | 144.0681  |
| 30   | 0      | 30     | 29    | 1       | 29      | A    | 0           | 156390.427   | -0.196                     | 144.0681  |
| 30   | 1      | 30     | 29    | 0       | 29      | A    | 0           | 156390.427   | -0.197                     | 144.0681  |
| 30   | 1      | 30     | 29    | 1       | 29      | A    | 0           | 156390.427   | -0.197                     | 144.0681  |
| 30   | 0      | 30     | 29    | 1       | 29      | E    | 0           | 156390.427   | 0.186                      | 144.0796  |
| 30   | 1      | 30     | 29    | 0       | 29      | E    | 0           | 156390.427   | 0.186                      | 144.0796  |
| 36   | 3      | 33     | 36    | 2       | 34      | A    | 1           | 156394.468   | 0.110                      | 324.0794  |
| 36   | 4      | 33     | 36    | 3       | 34      | A    | 1           | 156394.468   | 0.074                      | 324.0794  |
| 26   | 5      | 21     | 25    | 6       | 20      | A    | 0           | 156404.124   | -0.041                     | 141.8155  |
| 26   | 5      | 21     | 25    | 6       | 20      | E    | 0           | 156412.404   | 0.015                      | 141.8247  |
| 26   | 5      | 21     | 25    | 6       | 20      | A    | 1           | 156470.833   | -0.043                     | 270.4505  |
| 24   | 7      | 17     | 23    | 7       | 16      | A    | 0           | 156596.347   | -0.057                     | 134.3822  |
| 24   | 7      | 17     | 23    | 7       | 16      | E    | 0           | 156601.421   | -0.055                     | 134.3914  |
| 39   | 15     | 25     | 39    | 14      | 26      | E    | 0           | 156611.882   | -0.066                     | 266.3427  |



| $J'$ | $K'_a$ | $K'_c$ | $J''$ | $K''_a$ | $K''_c$ | Sym. | $v_{tCH_3}$ | $\nu_{Obs.}$ | $\nu_{Obs.} - \nu_{Calc.}$ | $E_{low}$ |
|------|--------|--------|-------|---------|---------|------|-------------|--------------|----------------------------|-----------|
| 39   | 15     | 24     | 39    | 14      | 25      | E    | 0           | 156612.930   | 0.009                      | 266.3557  |
| 25   | 10     | 16     | 24    | 10      | 15      | A    | 0           | 156631.956   | 0.018                      | 148.3155  |
| 39   | 15     | 24     | 39    | 14      | 25      | A    | 0           | 156636.123   | 0.017                      | 266.3494  |
| 25   | 10     | 15     | 24    | 10      | 14      | E    | 0           | 156644.625   | -0.093                     | 148.3271  |
| 25   | 10     | 16     | 24    | 10      | 15      | E    | 0           | 156645.629   | 0.055                      | 148.3149  |
| 25   | 10     | 15     | 24    | 10      | 14      | A    | 0           | 156654.717   | -0.059                     | 148.3161  |
| 39   | 15     | 25     | 39    | 14      | 26      | A    | 0           | 156681.246   | -0.012                     | 266.3477  |
| 26   | 5      | 22     | 25    | 4       | 21      | E    | 0           | 156770.455   | 0.009                      | 139.0182  |
| 26   | 5      | 22     | 25    | 4       | 21      | A    | 0           | 156776.753   | 0.014                      | 139.0087  |
| 26   | 5      | 22     | 25    | 4       | 21      | E    | 1           | 156782.485   | -0.003                     | 267.3490  |
| 36   | 3      | 33     | 36    | 2       | 34      | E    | 0           | 157058.533   | 0.058                      | 195.4546  |
| 36   | 4      | 33     | 36    | 3       | 34      | E    | 0           | 157058.533   | 0.018                      | 195.4546  |
| 36   | 3      | 33     | 36    | 2       | 34      | A    | 0           | 157081.781   | 0.072                      | 195.4451  |
| 36   | 4      | 33     | 36    | 3       | 34      | A    | 0           | 157081.781   | 0.032                      | 195.4451  |
| 33   | 1      | 32     | 33    | 0       | 33      | A    | 1           | 157101.435   | -0.378                     | 294.6562  |
| 33   | 2      | 32     | 33    | 1       | 33      | A    | 1           | 157101.435   | -0.378                     | 294.6562  |
| 36   | 3      | 33     | 36    | 2       | 34      | E    | 1           | 157151.116   | -0.060                     | 323.7742  |
| 36   | 4      | 33     | 36    | 3       | 34      | E    | 1           | 157151.116   | -0.103                     | 323.7742  |
| 2    | 2      | 0      | 2     | 1       | 1       | A    | 1           | 15718.657    | -0.017                     | 196.8320  |
| 60   | 17     | 44     | 60    | 16      | 45      | E    | 0           | 157349.535   | -0.007                     | 499.9503  |
| 49   | 16     | 34     | 49    | 15      | 35      | A    | 0           | 157361.718   | -0.016                     | 365.5452  |
| 59   | 17     | 43     | 59    | 16      | 44      | E    | 0           | 157413.362   | -0.051                     | 487.0974  |
| 59   | 17     | 43     | 59    | 16      | 44      | A    | 0           | 157456.150   | -0.026                     | 487.0964  |
| 25   | 9      | 17     | 24    | 9       | 16      | A    | 0           | 157461.810   | -0.049                     | 144.8474  |
| 25   | 9      | 17     | 24    | 9       | 16      | E    | 0           | 157498.286   | -0.019                     | 144.8511  |
| 38   | 15     | 24     | 38    | 14      | 25      | E    | 0           | 157603.198   | 0.030                      | 258.1456  |
| 38   | 15     | 23     | 38    | 14      | 24      | E    | 0           | 157605.431   | -0.029                     | 258.1586  |
| 38   | 15     | 23     | 38    | 14      | 24      | A    | 0           | 157638.748   | 0.055                      | 258.1520  |
| 38   | 15     | 24     | 38    | 14      | 25      | A    | 0           | 157661.234   | -0.026                     | 258.1512  |
| 65   | 19     | 46     | 65    | 18      | 47      | E    | 0           | 157679.094   | -0.071                     | 579.0090  |
| 25   | 9      | 16     | 24    | 9       | 15      | E    | 0           | 157680.589   | -0.005                     | 144.8650  |
| 25   | 9      | 16     | 24    | 9       | 15      | A    | 0           | 157712.410   | 0.058                      | 144.8557  |
| 65   | 19     | 46     | 65    | 18      | 47      | A    | 0           | 157763.474   | -0.069                     | 579.0076  |
| 48   | 16     | 32     | 48    | 15      | 33      | A    | 0           | 157825.802   | -0.023                     | 355.1681  |
| 48   | 16     | 32     | 48    | 15      | 33      | E    | 0           | 157863.907   | -0.130                     | 355.1695  |
| 25   | 7      | 19     | 24    | 7       | 18      | A    | 0           | 157865.031   | 0.007                      | 139.1435  |
| 25   | 7      | 19     | 24    | 7       | 18      | E    | 0           | 157865.031   | 0.041                      | 139.1521  |
| 33   | 1      | 32     | 33    | 0       | 33      | E    | 0           | 157868.648   | 0.059                      | 165.9728  |
| 33   | 2      | 32     | 33    | 1       | 33      | E    | 0           | 157868.648   | 0.058                      | 165.9728  |
| 5    | 1      | 4      | 5     | 0       | 5       | A    | 1           | 15787.548    | -0.015                     | 198.9106  |
| 60   | 18     | 42     | 60    | 17      | 43      | E    | 0           | 157875.258   | 0.040                      | 505.6392  |
| 33   | 1      | 32     | 33    | 0       | 33      | A    | 0           | 157897.029   | 0.095                      | 165.9613  |
| 33   | 2      | 32     | 33    | 1       | 33      | A    | 0           | 157897.029   | 0.095                      | 165.9613  |
| 52   | 12     | 41     | 52    | 11      | 42      | A    | 0           | 157971.158   | -0.265                     | 378.7388  |
| 52   | 12     | 41     | 52    | 11      | 42      | E    | 0           | 157971.158   | 0.115                      | 378.7421  |
| 33   | 1      | 32     | 33    | 0       | 33      | E    | 1           | 158029.374   | -0.003                     | 294.2864  |
| 33   | 2      | 32     | 33    | 1       | 33      | E    | 1           | 158029.374   | -0.003                     | 294.2864  |
| 58   | 17     | 42     | 58    | 16      | 43      | E    | 0           | 158043.244   | -0.011                     | 474.4544  |
| 58   | 17     | 42     | 58    | 16      | 43      | A    | 0           | 158043.244   | -0.039                     | 474.4535  |
| 55   | 12     | 43     | 55    | 11      | 44      | A    | 0           | 158132.164   | -0.109                     | 417.6140  |
| 55   | 12     | 43     | 55    | 11      | 44      | E    | 0           | 158147.811   | -0.029                     | 417.6167  |
| 25   | 8      | 18     | 24    | 8       | 17      | A    | 0           | 158223.779   | -0.040                     | 141.8103  |
| 25   | 8      | 18     | 24    | 8       | 17      | E    | 0           | 158229.563   | 0.012                      | 141.8177  |
| 25   | 5      | 20     | 24    | 5       | 19      | A    | 1           | 158286.920   | 0.088                      | 264.9588  |
| 5    | 1      | 4      | 5     | 0       | 5       | E    | 0           | 15844.731    | 0.001                      | 70.1923   |
| 5    | 1      | 4      | 5     | 0       | 5       | A    | 0           | 15846.377    | 0.005                      | 70.1804   |
| 37   | 15     | 23     | 37    | 14      | 24      | E    | 0           | 158500.372   | 0.006                      | 250.1713  |
| 37   | 15     | 22     | 37    | 14      | 23      | E    | 0           | 158502.283   | -0.042                     | 250.1844  |
| 25   | 5      | 20     | 24    | 5       | 19      | E    | 0           | 158506.661   | 0.003                      | 136.3164  |
| 25   | 5      | 20     | 24    | 5       | 19      | A    | 0           | 158514.618   | -0.065                     | 136.3064  |
| 25   | 5      | 20     | 24    | 5       | 19      | E    | 1           | 158527.354   | 0.008                      | 264.6412  |
| 37   | 15     | 22     | 37    | 14      | 23      | A    | 0           | 158541.054   | 0.055                      | 250.1776  |
| 37   | 15     | 23     | 37    | 14      | 24      | A    | 0           | 158551.904   | -0.077                     | 250.1772  |
| 50   | 10     | 40     | 50    | 9       | 41      | A    | 0           | 158598.585   | -0.098                     | 352.2141  |
| 50   | 10     | 40     | 50    | 9       | 41      | E    | 0           | 158599.720   | 0.057                      | 352.2180  |
| 38   | 4      | 34     | 38    | 3       | 35      | E    | 0           | 158640.409   | 0.148                      | 214.6846  |
| 38   | 5      | 34     | 38    | 4       | 35      | E    | 0           | 158640.409   | -0.108                     | 214.6846  |
| 10   | 9      | 2      | 9     | 8       | 2       | E    | 0           | 158647.846   | -0.020                     | 88.6923   |
| 38   | 4      | 34     | 38    | 3       | 35      | A    | 0           | 158661.250   | 0.170                      | 214.6761  |
| 38   | 5      | 34     | 38    | 4       | 35      | A    | 0           | 158661.250   | -0.088                     | 214.6761  |
| 10   | 9      | 1      | 9     | 8       | 1       | E    | 0           | 158674.357   | -0.036                     | 88.7033   |
| 24   | 6      | 18     | 23    | 6       | 17      | E    | 0           | 158677.139   | -0.120                     | 132.7081  |
| 24   | 6      | 18     | 23    | 6       | 17      | A    | 0           | 158678.191   | 0.071                      | 132.6979  |
| 10   | 9      | 2      | 9     | 8       | 1       | A    | 0           | 158695.325   | 0.017                      | 88.6906   |
| 10   | 9      | 1      | 9     | 8       | 2       | A    | 0           | 158695.325   | 0.017                      | 88.6906   |
| 38   | 4      | 34     | 38    | 3       | 35      | E    | 1           | 158697.464   | 0.060                      | 343.0049  |
| 38   | 5      | 34     | 38    | 4       | 35      | E    | 1           | 158697.464   | -0.213                     | 343.0049  |
| 2    | 2      | 0      | 2     | 1       | 1       | A    | 0           | 15873.604    | -0.009                     | 68.1020   |
| 67   | 16     | 51     | 67    | 15      | 52      | E    | 0           | 158738.651   | 0.070                      | 595.1114  |
| 2    | 2      | 0      | 2     | 1       | 1       | E    | 0           | 15882.238    | 0.036                      | 68.1138   |
| 48   | 16     | 33     | 48    | 15      | 34      | E    | 0           | 158895.881   | 0.058                      | 355.1218  |
| 5    | 1      | 4      | 5     | 0       | 5       | E    | 1           | 15894.624    | -0.013                     | 198.5279  |
| 59   | 15     | 45     | 59    | 14      | 46      | E    | 0           | 158985.301   | -0.018                     | 476.6919  |
| 59   | 15     | 45     | 59    | 14      | 46      | A    | 0           | 158988.091   | -0.120                     | 476.6901  |
| 48   | 16     | 33     | 48    | 15      | 34      | A    | 0           | 159038.122   | -0.005                     | 355.1220  |
| 57   | 17     | 41     | 57    | 16      | 42      | E    | 0           | 159126.696   | -0.005                     | 462.0274  |
| 61   | 16     | 46     | 61    | 15      | 47      | E    | 0           | 159150.406   | -0.014                     | 507.6979  |
| 61   | 16     | 46     | 61    | 15      | 47      | A    | 0           | 159160.212   | -0.100                     | 507.6965  |
| 57   | 17     | 41     | 57    | 16      | 42      | A    | 0           | 159180.049   | -0.127                     | 462.0267  |
| 17   | 6      | 12     | 16    | 5       | 11      | E    | 0           | 159186.479   | -0.024                     | 100.5538  |
| 17   | 6      | 12     | 16    | 5       | 11      | A    | 0           | 159225.675   | 0.017                      | 100.5433  |
| 50   | 11     | 40     | 50    | 10      | 41      | E    | 1           | 159243.467   | 0.149                      | 480.5169  |
| 36   | 15     | 22     | 36    | 14      | 23      | E    | 0           | 159312.425   | 0.021                      | 242.4186  |
| 36   | 15     | 21     | 36    | 14      | 22      | E    | 0           | 159313.620   | -0.059                     | 242.4318  |
| 36   | 15     | 21     | 36    | 14      | 22      | A    | 0           | 159355.223   | 0.096                      | 242.4250  |
| 36   | 15     | 22     | 36    | 14      | 23      | A    | 0           | 159360.273   | -0.052                     | 242.4248  |
| 35   | 2      | 33     | 35    | 1       | 34      | A    | 1           | 159372.516   | -0.107                     | 312.1937  |
| 35   | 3      | 33     | 35    | 2       | 34      | A    | 1           | 159372.516   | -0.109                     | 312.1937  |
| 50   | 11     | 40     | 50    | 10      | 41      | E    | 0           | 159457.915   | -0.027                     | 352.2216  |
| 50   | 11     | 40     | 50    | 10      | 41      | A    | 0           | 159460.637   | -0.066                     | 352.2178  |
| 12   | 8      | 5      | 11    | 7       | 5       | E    | 0           | 159464.826   | -0.003                     | 90.1652   |
| 12   | 8      | 4      | 11    | 7       | 4       | E    | 0           | 159495.977   | -0.004                     | 90.1751   |
| 12   | 8      | 4      | 11    | 7       | 5       | A    | 0           | 159511.738   | -0.160                     | 90.1618   |
| 58   | 13     | 45     | 58    | 12      | 46      | A    | 0           | 159805.901   | -0.141                     | 458.7033  |
| 58   | 13     | 45     | 58    | 12      | 46      | E    | 0           | 159829.384   | -0.012                     | 458.7054  |
| 40   | 5      | 35     | 40    | 4       | 36      | E    | 0           | 159867.031   | 0.005                      | 234.9855  |
| 40   | 6      | 35     | 40    | 5       | 36      | E    | 0           | 159868.397   | 0.017                      | 234.9855  |
| 40   | 5      | 35     | 40    | 4       | 36      | A    | 0           | 159885.397   | 0.170                      | 234.9779  |
| 40   | 6      | 35     | 40    | 5       | 36      | A    | 0           | 159886.713   | 0.125                      | 234.9779  |
| 47   | 16     | 31     | 47    | 15      | 32      | A    | 0           | 159945.891   | -0.043                     | 344.9557  |
| 14   | 7      | 8      | 13    | 6       | 7       | A    | 0           | 159977.855   | 0.007                      | 92.8968   |
| 47   | 16     | 31     | 47    | 15      | 32      | E    | 0           | 159997.826   | -0.106                     | 344.9574  |
| 14   | 7      | 8      | 13    | 6       | 8       | E    | 0           | 159999.002   | 0.020                      | 92.8998   |
| 14   | 7      | 7      | 13    | 6       | 7       | E    | 0           | 160015.874   | -0.033                     | 92.9090   |
| 25   | 8      | 17     | 24    | 8       | 16      | A    | 0           | 160032.131   | -0.061                     | 141.8900  |
| 25   | 8      | 17     | 24    | 8       | 16      | E    | 0           | 160033.199   | 0.056                      | 141.8981  |



| $J'$ | $K'_a$ | $K'_c$ | $J''$ | $K''_a$ | $K''_c$ | Sym. | $v_{tCH_3}$ | $\nu_{Obs.}$ | $\nu_{Obs.} - \nu_{Calc.}$ | $E_{low}$ |
|------|--------|--------|-------|---------|---------|------|-------------|--------------|----------------------------|-----------|
| 54   | 17     | 37     | 54    | 16      | 38      | E    | 0           | 160053.154   | -0.061                     | 426.2441  |
| 54   | 17     | 37     | 54    | 16      | 38      | A    | 0           | 160083.359   | -0.032                     | 426.2433  |
| 35   | 15     | 20     | 35    | 14      | 21      | A    | 0           | 160090.776   | 0.103                      | 234.8927  |
| 35   | 2      | 33     | 35    | 1       | 34      | E    | 0           | 160100.717   | 0.033                      | 183.5412  |
| 35   | 3      | 33     | 35    | 2       | 34      | E    | 0           | 160100.717   | 0.030                      | 183.5412  |
| 35   | 2      | 33     | 35    | 1       | 34      | A    | 0           | 160127.050   | 0.090                      | 183.5308  |
| 35   | 3      | 33     | 35    | 2       | 34      | A    | 0           | 160127.050   | 0.087                      | 183.5308  |
| 57   | 14     | 44     | 57    | 13      | 45      | A    | 0           | 160141.495   | -0.198                     | 446.6700  |
| 57   | 14     | 44     | 57    | 13      | 45      | E    | 0           | 160142.435   | 0.043                      | 446.6722  |
| 64   | 15     | 49     | 64    | 14      | 50      | E    | 0           | 160214.399   | -0.011                     | 547.4612  |
| 48   | 9      | 39     | 48    | 8       | 40      | E    | 0           | 160230.457   | -0.008                     | 326.7097  |
| 48   | 9      | 39     | 48    | 8       | 40      | A    | 0           | 160234.948   | -0.043                     | 326.7053  |
| 48   | 10     | 39     | 48    | 9       | 40      | E    | 1           | 160354.834   | 0.105                      | 455.0143  |
| 47   | 16     | 32     | 47    | 15      | 33      | E    | 0           | 160493.891   | 0.036                      | 344.9283  |
| 48   | 10     | 39     | 48    | 9       | 40      | E    | 0           | 160519.835   | -0.028                     | 326.7107  |
| 48   | 10     | 39     | 48    | 9       | 40      | A    | 0           | 160525.801   | 0.065                      | 326.7063  |
| 56   | 17     | 40     | 56    | 16      | 41      | E    | 0           | 160545.425   | 0.006                      | 449.8214  |
| 26   | 6      | 21     | 25    | 6       | 20      | A    | 1           | 160557.036   | -0.019                     | 270.4505  |
| 56   | 17     | 40     | 56    | 16      | 41      | A    | 0           | 160605.460   | -0.032                     | 449.8209  |
| 26   | 17     | 10     | 25    | 17      | 9       | A    | 0           | 160609.493   | -0.115                     | 189.1076  |
| 26   | 17     | 9      | 25    | 17      | 8       | A    | 0           | 160609.493   | -0.115                     | 189.1076  |
| 26   | 17     | 10     | 25    | 17      | 9       | E    | 0           | 160610.323   | 0.010                      | 189.0969  |
| 47   | 16     | 32     | 47    | 15      | 33      | A    | 0           | 160647.135   | -0.026                     | 344.9292  |
| 42   | 6      | 36     | 42    | 5       | 37      | E    | 1           | 160680.752   | -0.098                     | 384.6662  |
| 27   | 4      | 23     | 26    | 5       | 22      | A    | 1           | 160691.996   | 0.018                      | 272.8789  |
| 26   | 6      | 21     | 25    | 6       | 20      | E    | 0           | 160694.736   | -0.065                     | 141.8247  |
| 26   | 6      | 21     | 25    | 6       | 20      | A    | 0           | 160698.098   | -0.011                     | 141.8155  |
| 42   | 6      | 36     | 42    | 5       | 37      | E    | 0           | 160703.825   | 0.056                      | 256.3482  |
| 34   | 15     | 19     | 34    | 14      | 20      | E    | 0           | 160712.113   | 0.012                      | 227.5866  |
| 42   | 7      | 36     | 42    | 5       | 37      | A    | 0           | 160719.091   | -0.036                     | 256.3415  |
| 42   | 7      | 36     | 42    | 6       | 37      | A    | 0           | 160725.337   | 0.017                      | 256.3415  |
| 34   | 15     | 19     | 34    | 14      | 20      | A    | 0           | 160755.467   | -0.045                     | 227.5798  |
| 34   | 15     | 20     | 34    | 14      | 21      | A    | 0           | 160756.406   | -0.173                     | 227.5798  |
| 26   | 16     | 10     | 25    | 16      | 9       | A    | 0           | 160778.929   | -0.095                     | 182.8436  |
| 26   | 16     | 11     | 25    | 16      | 10      | A    | 0           | 160778.929   | -0.095                     | 182.8436  |
| 26   | 16     | 11     | 25    | 16      | 10      | E    | 0           | 160779.837   | -0.062                     | 182.8339  |
| 27   | 4      | 23     | 26    | 5       | 22      | E    | 1           | 160793.602   | -0.065                     | 272.5787  |
| 27   | 4      | 23     | 26    | 5       | 22      | E    | 0           | 160815.245   | -0.003                     | 144.2475  |
| 27   | 4      | 23     | 26    | 5       | 22      | A    | 0           | 160818.097   | -0.034                     | 144.2382  |
| 46   | 8      | 38     | 46    | 7       | 39      | E    | 1           | 160865.557   | 0.040                      | 430.5307  |
| 28   | 3      | 25     | 27    | 4       | 24      | A    | 1           | 160946.827   | -0.004                     | 274.8299  |
| 46   | 9      | 38     | 46    | 8       | 39      | E    | 1           | 160960.158   | 0.011                      | 430.5310  |
| 28   | 4      | 25     | 27    | 3       | 24      | A    | 1           | 160971.680   | 0.018                      | 274.8294  |
| 26   | 15     | 12     | 25    | 15      | 11      | A    | 0           | 160983.902   | -0.058                     | 176.9681  |
| 26   | 15     | 11     | 25    | 15      | 10      | A    | 0           | 160983.902   | -0.058                     | 176.9681  |
| 46   | 8      | 38     | 46    | 7       | 39      | E    | 0           | 160986.209   | 0.011                      | 302.2207  |
| 46   | 8      | 38     | 46    | 7       | 39      | A    | 0           | 160994.917   | -0.007                     | 302.2156  |
| 44   | 7      | 37     | 44    | 6       | 38      | E    | 1           | 161032.907   | -0.052                     | 407.0781  |
| 28   | 3      | 25     | 27    | 4       | 24      | E    | 1           | 161044.833   | -0.014                     | 274.5211  |
| 28   | 4      | 25     | 27    | 4       | 24      | E    | 1           | 161054.439   | 0.013                      | 274.5211  |
| 44   | 8      | 37     | 44    | 7       | 38      | E    | 1           | 161059.269   | -0.040                     | 407.0781  |
| 28   | 3      | 25     | 27    | 3       | 24      | E    | 1           | 161063.063   | 0.043                      | 274.5205  |
| 28   | 3      | 25     | 27    | 4       | 24      | E    | 0           | 161064.772   | -0.018                     | 146.1906  |
| 28   | 3      | 25     | 27    | 4       | 24      | A    | 0           | 161067.793   | 0.004                      | 146.1809  |
| 28   | 4      | 25     | 27    | 3       | 24      | E    | 1           | 161072.590   | -0.009                     | 274.5205  |
| 28   | 4      | 25     | 27    | 4       | 24      | E    | 0           | 161073.958   | -0.015                     | 146.1906  |
| 46   | 9      | 38     | 46    | 8       | 39      | E    | 0           | 161075.074   | 0.001                      | 302.2210  |
| 28   | 4      | 25     | 27    | 4       | 24      | A    | 0           | 161076.992   | -0.018                     | 146.1809  |
| 28   | 3      | 25     | 27    | 3       | 24      | E    | 0           | 161082.352   | 0.089                      | 146.1900  |
| 46   | 9      | 38     | 46    | 8       | 39      | A    | 0           | 161084.092   | -0.144                     | 302.2158  |
| 28   | 3      | 25     | 27    | 3       | 24      | A    | 0           | 161085.302   | -0.029                     | 146.1804  |
| 27   | 5      | 23     | 26    | 5       | 22      | A    | 0           | 161087.795   | 0.009                      | 144.2382  |
| 28   | 4      | 25     | 27    | 3       | 24      | E    | 0           | 161091.417   | -0.029                     | 146.1900  |
| 28   | 4      | 25     | 27    | 3       | 24      | A    | 0           | 161094.535   | -0.017                     | 146.1804  |
| 44   | 7      | 37     | 44    | 6       | 38      | E    | 0           | 161101.680   | 0.001                      | 278.7632  |
| 44   | 7      | 37     | 44    | 6       | 38      | A    | 0           | 161113.910   | -0.010                     | 278.7574  |
| 44   | 8      | 37     | 44    | 7       | 38      | E    | 0           | 161126.440   | 0.046                      | 278.7633  |
| 29   | 2      | 27     | 28    | 2       | 26      | E    | 0           | 161167.687   | -0.124                     | 147.6588  |
| 29   | 3      | 27     | 28    | 3       | 26      | E    | 0           | 161167.687   | 0.061                      | 147.6588  |
| 29   | 2      | 27     | 28    | 2       | 26      | A    | 0           | 161169.912   | -0.057                     | 147.6487  |
| 29   | 2      | 27     | 28    | 3       | 26      | A    | 0           | 161169.912   | 0.310                      | 147.6487  |
| 29   | 3      | 27     | 28    | 2       | 26      | A    | 0           | 161169.912   | -0.239                     | 147.6487  |
| 29   | 3      | 27     | 28    | 3       | 26      | A    | 0           | 161169.912   | 0.128                      | 147.6487  |
| 26   | 14     | 12     | 25    | 14      | 11      | A    | 0           | 161235.930   | 0.134                      | 171.4832  |
| 26   | 14     | 13     | 25    | 14      | 12      | A    | 0           | 161235.930   | 0.134                      | 171.4832  |
| 26   | 14     | 13     | 25    | 14      | 12      | E    | 0           | 161237.206   | 0.075                      | 171.4761  |
| 30   | 1      | 29     | 29    | 1       | 28      | A    | 1           | 161255.877   | 0.000                      | 277.3546  |
| 30   | 1      | 29     | 29    | 2       | 28      | A    | 1           | 161255.877   | 0.004                      | 277.3546  |
| 30   | 2      | 29     | 29    | 1       | 28      | A    | 1           | 161255.877   | -0.001                     | 277.3546  |
| 30   | 2      | 29     | 29    | 2       | 28      | A    | 1           | 161255.877   | 0.002                      | 277.3546  |
| 27   | 4      | 23     | 26    | 4       | 22      | E    | 1           | 161281.476   | 0.031                      | 272.5624  |
| 27   | 4      | 23     | 26    | 4       | 22      | E    | 0           | 161288.342   | 0.023                      | 144.2317  |
| 27   | 4      | 23     | 26    | 4       | 22      | A    | 0           | 161292.698   | -0.070                     | 144.2223  |
| 30   | 1      | 29     | 29    | 1       | 28      | E    | 1           | 161297.798   | -0.010                     | 277.0102  |
| 30   | 1      | 29     | 29    | 2       | 28      | E    | 1           | 161297.798   | -0.005                     | 277.0102  |
| 30   | 2      | 29     | 29    | 1       | 28      | E    | 1           | 161297.798   | -0.012                     | 277.0102  |
| 30   | 2      | 29     | 29    | 2       | 28      | E    | 1           | 161297.798   | -0.007                     | 277.0102  |
| 33   | 15     | 18     | 33    | 14      | 19      | E    | 0           | 161312.488   | -0.138                     | 220.4919  |
| 33   | 15     | 19     | 33    | 14      | 20      | E    | 0           | 161313.417   | 0.129                      | 220.4786  |
| 30   | 1      | 29     | 29    | 1       | 28      | E    | 0           | 161330.311   | 0.014                      | 148.6866  |
| 30   | 2      | 29     | 29    | 2       | 28      | E    | 0           | 161330.311   | 0.016                      | 148.6866  |
| 30   | 1      | 29     | 29    | 1       | 28      | A    | 0           | 161331.558   | -0.026                     | 148.6759  |
| 30   | 1      | 29     | 29    | 2       | 28      | A    | 0           | 161331.558   | -0.022                     | 148.6759  |
| 30   | 2      | 29     | 29    | 1       | 28      | A    | 0           | 161331.558   | -0.028                     | 148.6759  |
| 30   | 2      | 29     | 29    | 2       | 28      | A    | 0           | 161331.558   | -0.024                     | 148.6759  |
| 37   | 3      | 34     | 37    | 2       | 35      | A    | 1           | 161350.816   | 0.135                      | 330.8199  |
| 37   | 4      | 34     | 37    | 3       | 35      | A    | 1           | 161350.816   | 0.117                      | 330.8199  |
| 33   | 15     | 18     | 33    | 14      | 19      | A    | 0           | 161356.513   | 0.209                      | 220.4852  |
| 27   | 5      | 23     | 26    | 4       | 22      | A    | 1           | 161391.414   | 0.032                      | 272.8640  |
| 31   | 0      | 31     | 30    | 0       | 30      | A    | 1           | 161468.789   | 0.043                      | 277.9850  |
| 31   | 0      | 31     | 30    | 1       | 30      | A    | 1           | 161468.789   | 0.043                      | 277.9850  |
| 31   | 1      | 31     | 30    | 0       | 30      | A    | 1           | 161468.789   | 0.043                      | 277.9850  |
| 31   | 1      | 31     | 30    | 1       | 30      | A    | 1           | 161468.789   | 0.043                      | 277.9850  |
| 31   | 0      | 31     | 30    | 0       | 30      | E    | 1           | 161480.928   | -0.029                     | 277.6140  |
| 31   | 1      | 31     | 30    | 1       | 30      | E    | 1           | 161480.928   | -0.029                     | 277.6140  |
| 31   | 0      | 31     | 30    | 0       | 30      | A    | 0           | 161520.156   | -0.201                     | 149.2847  |
| 31   | 0      | 31     | 30    | 1       | 30      | A    | 0           | 161520.156   | -0.201                     | 149.2847  |
| 31   | 1      | 31     | 30    | 0       | 30      | A    | 0           | 161520.156   | -0.201                     | 149.2847  |
| 31   | 1      | 31     | 30    | 1       | 30      | A    | 0           | 161520.156   | -0.201                     | 149.2847  |
| 31   | 0      | 31     | 30    | 0       | 30      | E    | 0           | 161520.156   | 0.178                      | 149.2963  |
| 31   | 1      | 31     | 30    | 1       | 30      | E    | 0           | 161520.156   | 0.178                      | 149.2963  |
| 26   | 13     | 14     | 25    | 13      | 13      | A    | 0           | 161551.120   | -0.056                     | 166.3921  |
| 27   | 5      | 23     | 26    | 4       | 22      | E    | 0           | 161557.017   | -0.014                     | 144.2317  |
| 27   | 5      | 23     | 26    | 4       | 22      | A    | 0           | 161562.412   | -0.011                     | 144.2223  |
| 3    | 2      | 1      | 3     | 1       | 2       | E    | 1           | 16165.707    | 0.204                      | 197.1113  |
| 46   | 16     | 30     | 46    | 15      | 31      | A    | 0           | 161769.330   | -0.031                     | 334.9812  |



| $J'$ | $K'_a$ | $K'_c$ | $J''$ | $K''_a$ | $K''_c$ | Sym. | $v_{tCH_3}$ | $\nu_{Obs.}$ | $\nu_{Obs.} - \nu_{Calc.}$ | $E_{low}$ |
|------|--------|--------|-------|---------|---------|------|-------------|--------------|----------------------------|-----------|
| 46   | 16     | 30     | 46    | 15      | 31      | E    | 0           | 161815.999   | -0.085                     | 334.9836  |
| 32   | 15     | 17     | 32    | 14      | 18      | E    | 0           | 161854.993   | -0.034                     | 213.6146  |
| 32   | 15     | 18     | 32    | 14      | 19      | E    | 0           | 161856.218   | 0.005                      | 213.6012  |
| 55   | 13     | 43     | 55    | 12      | 44      | A    | 0           | 161881.219   | -0.040                     | 417.6349  |
| 55   | 13     | 43     | 55    | 12      | 44      | E    | 0           | 161882.424   | -0.028                     | 417.6375  |
| 32   | 15     | 18     | 32    | 14      | 19      | A    | 0           | 161898.913   | -0.085                     | 213.6079  |
| 26   | 12     | 15     | 25    | 12      | 14      | A    | 0           | 161955.560   | 0.062                      | 161.6992  |
| 26   | 12     | 15     | 25    | 12      | 14      | E    | 0           | 161957.689   | -0.004                     | 161.6950  |
| 46   | 16     | 31     | 46    | 15      | 32      | E    | 0           | 162019.704   | -0.003                     | 334.9644  |
| 37   | 3      | 34     | 37    | 2       | 35      | E    | 0           | 162036.406   | 0.058                      | 202.1987  |
| 37   | 4      | 34     | 37    | 3       | 35      | E    | 0           | 162036.406   | 0.038                      | 202.1987  |
| 37   | 3      | 34     | 37    | 2       | 35      | A    | 0           | 162060.404   | 0.046                      | 202.1892  |
| 37   | 4      | 34     | 37    | 3       | 35      | A    | 0           | 162060.404   | 0.026                      | 202.1892  |
| 37   | 3      | 34     | 37    | 2       | 35      | E    | 1           | 162132.707   | -0.041                     | 330.5169  |
| 37   | 4      | 34     | 37    | 3       | 35      | E    | 1           | 162132.707   | -0.062                     | 330.5169  |
| 46   | 16     | 31     | 46    | 15      | 32      | A    | 0           | 162165.361   | -0.014                     | 334.9664  |
| 53   | 11     | 42     | 53    | 10      | 43      | A    | 0           | 162166.825   | -0.089                     | 389.5841  |
| 53   | 11     | 42     | 53    | 10      | 43      | E    | 0           | 162172.629   | 0.008                      | 389.5872  |
| 55   | 17     | 39     | 55    | 16      | 40      | E    | 0           | 162185.399   | -0.001                     | 437.8408  |
| 16   | 5      | 11     | 15    | 4       | 12      | E    | 0           | 162228.352   | 0.023                      | 95.1424   |
| 16   | 6      | 10     | 15    | 5       | 11      | E    | 0           | 162240.699   | 0.016                      | 96.9265   |
| 16   | 6      | 10     | 15    | 5       | 11      | A    | 0           | 162246.682   | 0.024                      | 96.9164   |
| 31   | 15     | 16     | 31    | 14      | 17      | E    | 0           | 162344.237   | -0.052                     | 206.9537  |
| 31   | 15     | 17     | 31    | 14      | 18      | E    | 0           | 162345.981   | 0.038                      | 206.9402  |
| 31   | 15     | 17     | 31    | 14      | 18      | A    | 0           | 162388.144   | -0.027                     | 206.9470  |
| 26   | 11     | 16     | 25    | 11      | 15      | A    | 0           | 162488.942   | 0.057                      | 157.4115  |
| 26   | 11     | 15     | 25    | 11      | 14      | E    | 0           | 162491.343   | 0.090                      | 157.4219  |
| 26   | 11     | 15     | 25    | 11      | 14      | A    | 0           | 162492.376   | -0.041                     | 157.4116  |
| 26   | 11     | 16     | 25    | 11      | 15      | E    | 0           | 162493.390   | 0.055                      | 157.4091  |
| 19   | 6      | 14     | 18    | 5       | 13      | E    | 0           | 162606.398   | -0.090                     | 108.2107  |
| 19   | 6      | 14     | 18    | 5       | 13      | A    | 0           | 162644.440   | 0.016                      | 108.2001  |
| 30   | 15     | 15     | 30    | 14      | 16      | E    | 0           | 162784.851   | -0.048                     | 200.5083  |
| 30   | 15     | 16     | 30    | 14      | 17      | E    | 0           | 162786.991   | 0.019                      | 200.4948  |
| 34   | 1      | 33     | 34    | 0       | 34      | E    | 0           | 162805.928   | -0.004                     | 171.8738  |
| 34   | 2      | 33     | 34    | 1       | 34      | E    | 0           | 162805.928   | -0.004                     | 171.8738  |
| 30   | 15     | 15     | 30    | 14      | 16      | A    | 0           | 162828.706   | 0.008                      | 200.5017  |
| 34   | 1      | 33     | 34    | 0       | 34      | A    | 0           | 162835.272   | 0.098                      | 171.8623  |
| 34   | 2      | 33     | 34    | 1       | 34      | A    | 0           | 162835.272   | 0.098                      | 171.8623  |
| 54   | 17     | 37     | 53    | 18      | 36      | A    | 0           | 162841.456   | -0.142                     | 426.1512  |
| 32   | 8      | 24     | 31    | 9       | 23      | A    | 0           | 162883.924   | -0.006                     | 186.2560  |
| 34   | 1      | 33     | 34    | 0       | 34      | E    | 1           | 162971.808   | 0.126                      | 300.1860  |
| 34   | 2      | 33     | 34    | 1       | 34      | E    | 1           | 162971.808   | 0.126                      | 300.1860  |
| 39   | 4      | 35     | 39    | 3       | 36      | A    | 1           | 163016.935   | 0.407                      | 350.5263  |
| 39   | 5      | 35     | 39    | 4       | 36      | A    | 1           | 163016.935   | 0.288                      | 350.5263  |
| 26   | 5      | 21     | 25    | 5       | 20      | E    | 0           | 163039.780   | -0.002                     | 141.6036  |
| 26   | 5      | 21     | 25    | 5       | 20      | A    | 1           | 163047.722   | 0.009                      | 141.5939  |
| 26   | 5      | 21     | 25    | 5       | 20      | E    | 1           | 163063.119   | -0.009                     | 269.9291  |
| 22   | 6      | 17     | 21    | 5       | 16      | E    | 0           | 163081.584   | -0.074                     | 121.4099  |
| 22   | 6      | 17     | 21    | 5       | 16      | A    | 0           | 163117.385   | 0.004                      | 121.3994  |
| 20   | 6      | 15     | 19    | 5       | 14      | E    | 0           | 163120.238   | -0.053                     | 112.3948  |
| 20   | 6      | 15     | 19    | 5       | 14      | A    | 0           | 163158.292   | 0.001                      | 112.3841  |
| 21   | 6      | 16     | 20    | 5       | 15      | E    | 0           | 163173.200   | -0.054                     | 116.7996  |
| 29   | 15     | 14     | 29    | 14      | 15      | E    | 0           | 163180.840   | -0.086                     | 194.2778  |
| 29   | 15     | 15     | 29    | 14      | 16      | E    | 0           | 163183.406   | 0.033                      | 194.2643  |
| 21   | 6      | 16     | 20    | 5       | 15      | A    | 0           | 163210.679   | 0.040                      | 116.7890  |
| 23   | 6      | 18     | 22    | 5       | 17      | A    | 0           | 163213.612   | -0.054                     | 126.1990  |
| 29   | 15     | 15     | 29    | 14      | 16      | A    | 0           | 163224.719   | 0.001                      | 194.2712  |
| 59   | 18     | 41     | 59    | 17      | 42      | E    | 0           | 163226.062   | -0.038                     | 492.6351  |
| 26   | 10     | 17     | 25    | 10      | 16      | E    | 0           | 163230.816   | 0.005                      | 153.5400  |
| 26   | 10     | 16     | 25    | 10      | 15      | E    | 0           | 163236.332   | 0.182                      | 153.5522  |
| 62   | 16     | 47     | 62    | 15      | 48      | A    | 0           | 163249.778   | -0.077                     | 520.8131  |
| 26   | 10     | 16     | 25    | 10      | 15      | A    | 0           | 163255.172   | -0.017                     | 153.5415  |
| 2    | 1      | 2      | 1     | 0       | 1       | E    | 1           | 16326.308    | -0.007                     | 195.8025  |
| 59   | 18     | 41     | 59    | 17      | 42      | A    | 0           | 163283.010   | -0.010                     | 492.6345  |
| 27   | 5      | 22     | 26    | 6       | 21      | A    | 1           | 163330.974   | -0.010                     | 275.8061  |
| 27   | 5      | 22     | 26    | 6       | 21      | A    | 0           | 163340.250   | -0.058                     | 147.1758  |
| 27   | 5      | 22     | 26    | 6       | 21      | E    | 0           | 163344.431   | 0.016                      | 147.1849  |
| 45   | 16     | 29     | 45    | 15      | 30      | A    | 0           | 163362.386   | -0.014                     | 325.2408  |
| 45   | 16     | 29     | 45    | 15      | 30      | E    | 0           | 163388.278   | -0.001                     | 325.2441  |
| 53   | 17     | 36     | 53    | 16      | 37      | E    | 0           | 163404.700   | -0.065                     | 414.6619  |
| 53   | 17     | 36     | 53    | 16      | 37      | A    | 0           | 163409.611   | -0.017                     | 414.6613  |
| 45   | 16     | 30     | 45    | 15      | 31      | E    | 0           | 163458.030   | -0.033                     | 325.2294  |
| 28   | 15     | 13     | 28    | 14      | 14      | E    | 0           | 163536.016   | -0.064                     | 188.2614  |
| 28   | 15     | 14     | 28    | 14      | 15      | E    | 0           | 163538.874   | 0.014                      | 188.2478  |
| 28   | 15     | 13     | 28    | 14      | 14      | A    | 0           | 163579.820   | -0.018                     | 188.2548  |
| 45   | 16     | 30     | 45    | 15      | 31      | A    | 0           | 163580.905   | 0.045                      | 325.2327  |
| 53   | 12     | 42     | 53    | 11      | 43      | A    | 0           | 163633.748   | -0.274                     | 389.5910  |
| 53   | 12     | 42     | 53    | 11      | 43      | E    | 0           | 163633.748   | 0.199                      | 389.5940  |
| 39   | 4      | 35     | 39    | 3       | 36      | E    | 0           | 163656.502   | 0.089                      | 221.9366  |
| 39   | 5      | 35     | 39    | 4       | 36      | E    | 0           | 163656.502   | -0.043                     | 221.9366  |
| 39   | 4      | 35     | 39    | 3       | 36      | A    | 0           | 163678.090   | 0.120                      | 221.9281  |
| 39   | 5      | 35     | 39    | 4       | 36      | A    | 0           | 163678.090   | -0.012                     | 221.9281  |
| 39   | 4      | 35     | 39    | 3       | 36      | E    | 1           | 163716.886   | -0.001                     | 350.2556  |
| 39   | 5      | 35     | 39    | 4       | 36      | E    | 1           | 163716.886   | -0.141                     | 350.2556  |
| 24   | 6      | 19     | 23    | 5       | 18      | E    | 0           | 163786.524   | -0.050                     | 131.1825  |
| 24   | 6      | 19     | 23    | 5       | 18      | A    | 0           | 163815.447   | 0.017                      | 131.1723  |
| 27   | 15     | 12     | 27    | 14      | 13      | E    | 0           | 163853.681   | -0.076                     | 182.4583  |
| 27   | 15     | 13     | 27    | 14      | 14      | E    | 0           | 163856.836   | 0.003                      | 182.4447  |
| 26   | 7      | 20     | 25    | 7       | 19      | E    | 0           | 163887.089   | -0.073                     | 144.4180  |
| 26   | 7      | 20     | 25    | 7       | 19      | A    | 0           | 163888.118   | 0.063                      | 144.4093  |
| 27   | 15     | 13     | 27    | 14      | 14      | A    | 0           | 163897.506   | 0.014                      | 182.4518  |
| 27   | 15     | 12     | 27    | 14      | 13      | A    | 0           | 163897.506   | 0.015                      | 182.4518  |
| 54   | 17     | 38     | 54    | 16      | 39      | A    | 0           | 164028.776   | -0.056                     | 426.0885  |
| 26   | 9      | 18     | 25    | 9       | 17      | A    | 0           | 164108.235   | -0.014                     | 150.0998  |
| 26   | 9      | 18     | 25    | 9       | 17      | E    | 0           | 164133.314   | -0.018                     | 150.1047  |
| 26   | 15     | 11     | 26    | 14      | 12      | E    | 0           | 164137.025   | -0.057                     | 176.8680  |
| 26   | 15     | 12     | 26    | 14      | 13      | E    | 0           | 164140.442   | 0.021                      | 176.8544  |
| 26   | 15     | 12     | 26    | 14      | 13      | A    | 0           | 164180.801   | 0.008                      | 176.8615  |
| 64   | 17     | 48     | 64    | 16      | 49      | E    | 0           | 164209.689   | 0.008                      | 553.3302  |
| 25   | 7      | 18     | 24    | 7       | 17      | A    | 0           | 164272.920   | 0.084                      | 139.6057  |
| 25   | 7      | 18     | 24    | 7       | 17      | E    | 0           | 164277.586   | -0.023                     | 139.6150  |
| 36   | 2      | 34     | 36    | 1       | 35      | A    | 1           | 164300.433   | -0.144                     | 318.5989  |
| 36   | 3      | 34     | 36    | 2       | 35      | A    | 1           | 164300.433   | -0.145                     | 318.5989  |
| 2    | 1      | 2      | 1     | 0       | 1       | A    | 1           | 16433.505    | 0.008                      | 196.1862  |
| 25   | 15     | 10     | 25    | 14      | 11      | E    | 0           | 164388.886   | -0.054                     | 171.4897  |
| 25   | 15     | 11     | 25    | 14      | 12      | E    | 0           | 164392.567   | 0.056                      | 171.4761  |
| 25   | 15     | 11     | 25    | 14      | 12      | A    | 0           | 164432.644   | 0.016                      | 171.4832  |
| 25   | 15     | 10     | 25    | 14      | 11      | A    | 0           | 164432.644   | 0.016                      | 171.4832  |
| 64   | 19     | 45     | 64    | 18      | 46      | E    | 0           | 164506.405   | -0.036                     | 564.8258  |
| 28   | 6      | 22     | 27    | 7       | 21      | A    | 0           | 164531.001   | -0.109                     | 155.5384  |
| 51   | 10     | 41     | 51    | 9       | 42      | A    | 0           | 164532.744   | 0.007                      | 362.5462  |
| 26   | 9      | 17     | 25    | 9       | 16      | E    | 0           | 164550.931   | 0.016                      | 150.1247  |
| 28   | 6      | 22     | 27    | 7       | 21      | E    | 0           | 164554.619   | 0.035                      | 155.5469  |
| 26   | 9      | 17     | 25    | 9       | 16      | A    | 0           | 164570.516   | -0.006                     | 150.1164  |
| 24   | 15     | 9      | 24    | 14      | 10      | E    | 0           | 164611.922   | -0.086                     | 166.3229  |
| 24   | 15     | 10     | 24    | 14      | 11      | E    | 0           | 164615.846   | 0.062                      | 166.3093  |



| $J'$ | $K'_a$ | $K'_c$ | $J''$ | $K''_a$ | $K''_c$ | Sym. | $v_{tCH_3}$ | $\nu_{Obs.}$ | $\nu_{Obs.} - \nu_{Calc.}$ | $E_{low}$ |
|------|--------|--------|-------|---------|---------|------|-------------|--------------|----------------------------|-----------|
| 24   | 15     | 10     | 24    | 14      | 11      | A    | 0           | 164655.687   | 0.012                      | 166.3165  |
| 24   | 15     | 9      | 24    | 14      | 10      | A    | 0           | 164655.687   | 0.012                      | 166.3165  |
| 26   | 8      | 19     | 25    | 8       | 18      | A    | 0           | 164745.563   | -0.027                     | 147.0881  |
| 26   | 8      | 19     | 25    | 8       | 18      | E    | 0           | 164749.033   | -0.019                     | 147.0957  |
| 25   | 6      | 19     | 24    | 6       | 18      | E    | 0           | 164763.726   | -0.010                     | 138.0010  |
| 25   | 6      | 19     | 24    | 6       | 18      | A    | 0           | 164766.896   | -0.020                     | 137.9908  |
| 44   | 16     | 28     | 44    | 15      | 29      | A    | 0           | 164772.037   | -0.078                     | 315.7313  |
| 44   | 16     | 28     | 44    | 15      | 29      | E    | 0           | 164773.074   | 0.030                      | 315.7355  |
| 11   | 9      | 3      | 10    | 8       | 3       | E    | 0           | 164792.441   | 0.004                      | 90.7479   |
| 44   | 16     | 29     | 44    | 15      | 30      | E    | 0           | 164793.715   | -0.050                     | 315.7223  |
| 23   | 15     | 8      | 23    | 14      | 9       | E    | 0           | 164808.757   | -0.015                     | 161.3671  |
| 23   | 15     | 9      | 23    | 14      | 10      | E    | 0           | 164812.750   | 0.022                      | 161.3534  |
| 11   | 9      | 2      | 10    | 8       | 2       | E    | 0           | 164818.995   | -0.011                     | 90.7589   |
| 11   | 9      | 3      | 10    | 8       | 2       | A    | 0           | 164839.922   | 0.030                      | 90.7462   |
| 11   | 9      | 2      | 10    | 8       | 3       | A    | 0           | 164839.922   | 0.029                      | 90.7462   |
| 51   | 11     | 41     | 51    | 10      | 42      | E    | 1           | 164842.276   | 0.191                      | 490.8457  |
| 23   | 15     | 9      | 23    | 14      | 10      | A    | 0           | 164852.429   | 0.012                      | 161.3606  |
| 23   | 15     | 8      | 23    | 14      | 9       | A    | 0           | 164852.429   | 0.012                      | 161.3606  |
| 2    | 1      | 2      | 1     | 0       | 1       | E    | 0           | 16487.376    | 0.014                      | 67.4660   |
| 44   | 16     | 29     | 44    | 15      | 30      | A    | 0           | 164889.832   | -0.019                     | 315.7270  |
| 2    | 1      | 2      | 1     | 0       | 1       | A    | 0           | 16489.919    | -0.004                     | 67.4541   |
| 41   | 5      | 36     | 41    | 4       | 37      | E    | 1           | 164958.610   | -0.165                     | 371.0648  |
| 41   | 6      | 36     | 41    | 5       | 37      | E    | 1           | 164959.564   | 0.026                      | 371.0648  |
| 22   | 15     | 7      | 22    | 14      | 8       | E    | 0           | 164981.509   | -0.038                     | 156.6216  |
| 22   | 15     | 8      | 22    | 14      | 9       | E    | 0           | 164985.676   | 0.015                      | 156.6079  |
| 22   | 15     | 8      | 22    | 14      | 9       | A    | 0           | 165025.234   | 0.062                      | 156.6151  |
| 22   | 15     | 7      | 22    | 14      | 8       | A    | 0           | 165025.234   | 0.062                      | 156.6151  |
| 36   | 2      | 34     | 36    | 1       | 35      | E    | 0           | 165051.524   | 0.068                      | 189.9491  |
| 51   | 11     | 41     | 51    | 10      | 42      | E    | 0           | 165053.373   | -0.025                     | 362.5519  |
| 51   | 11     | 41     | 51    | 10      | 42      | A    | 0           | 165056.624   | -0.077                     | 362.5483  |
| 36   | 2      | 34     | 36    | 1       | 35      | A    | 0           | 165078.658   | 0.098                      | 189.9387  |
| 21   | 15     | 6      | 21    | 14      | 7       | E    | 0           | 165132.456   | -0.042                     | 152.0860  |
| 25   | 6      | 20     | 24    | 5       | 19      | E    | 0           | 165133.996   | -0.054                     | 136.3164  |
| 21   | 15     | 7      | 21    | 14      | 8       | E    | 0           | 165136.841   | 0.093                      | 152.0723  |
| 25   | 6      | 20     | 24    | 5       | 19      | A    | 0           | 165158.240   | 0.010                      | 136.3064  |
| 56   | 12     | 44     | 56    | 11      | 45      | A    | 0           | 165160.019   | -0.108                     | 429.1658  |
| 56   | 12     | 44     | 56    | 11      | 45      | E    | 0           | 165171.375   | -0.047                     | 429.1682  |
| 21   | 15     | 7      | 21    | 14      | 8       | A    | 0           | 165176.110   | 0.006                      | 152.0796  |
| 21   | 15     | 6      | 21    | 14      | 7       | A    | 0           | 165176.110   | 0.006                      | 152.0796  |
| 36   | 2      | 34     | 36    | 1       | 35      | E    | 1           | 165185.492   | 0.007                      | 318.2642  |
| 36   | 3      | 34     | 36    | 2       | 35      | E    | 1           | 165185.492   | 0.006                      | 318.2642  |
| 20   | 15     | 5      | 20    | 14      | 6       | E    | 0           | 165263.568   | -0.077                     | 147.7598  |
| 20   | 15     | 6      | 20    | 14      | 7       | E    | 0           | 165268.052   | 0.039                      | 147.7461  |
| 20   | 15     | 6      | 20    | 14      | 7       | A    | 0           | 165307.239   | 0.006                      | 147.7534  |
| 20   | 15     | 5      | 20    | 14      | 6       | A    | 0           | 165307.239   | 0.006                      | 147.7534  |
| 19   | 15     | 4      | 19    | 14      | 5       | E    | 0           | 165376.825   | -0.057                     | 143.6425  |
| 19   | 15     | 5      | 19    | 14      | 6       | E    | 0           | 165381.298   | -0.055                     | 143.6288  |
| 19   | 15     | 5      | 19    | 14      | 6       | A    | 0           | 165420.451   | -0.002                     | 143.6361  |
| 19   | 15     | 4      | 19    | 14      | 5       | A    | 0           | 165420.451   | -0.002                     | 143.6361  |
| 64   | 18     | 47     | 64    | 17      | 48      | E    | 0           | 165436.040   | -0.021                     | 558.8076  |
| 63   | 18     | 46     | 63    | 17      | 47      | E    | 0           | 165459.275   | -0.011                     | 545.0853  |
| 18   | 15     | 3      | 18    | 14      | 4       | E    | 0           | 165473.891   | -0.090                     | 139.7337  |
| 18   | 15     | 4      | 18    | 14      | 5       | E    | 0           | 165478.554   | 0.016                      | 139.7200  |
| 63   | 18     | 46     | 63    | 17      | 47      | A    | 0           | 165500.675   | -0.060                     | 545.0849  |
| 18   | 15     | 4      | 18    | 14      | 5       | A    | 0           | 165517.553   | 0.017                      | 139.7273  |
| 18   | 15     | 3      | 18    | 14      | 4       | A    | 0           | 165517.553   | 0.017                      | 139.7273  |
| 17   | 15     | 2      | 17    | 14      | 3       | E    | 0           | 165556.396   | -0.208                     | 136.0330  |
| 17   | 15     | 3      | 17    | 14      | 4       | E    | 0           | 165561.284   | 0.049                      | 136.0193  |
| 13   | 8      | 6      | 12    | 7       | 6       | E    | 0           | 165568.297   | -0.004                     | 92.6439   |
| 13   | 8      | 5      | 12    | 7       | 5       | E    | 0           | 165599.570   | -0.051                     | 92.6537   |
| 17   | 15     | 3      | 17    | 14      | 4       | A    | 0           | 165600.149   | 0.007                      | 136.0266  |
| 17   | 15     | 2      | 17    | 14      | 3       | A    | 0           | 165600.149   | 0.007                      | 136.0266  |
| 13   | 8      | 6      | 12    | 7       | 5       | A    | 0           | 165614.601   | 0.073                      | 92.6405   |
| 13   | 8      | 5      | 12    | 7       | 6       | A    | 0           | 165615.942   | -0.063                     | 92.6405   |
| 58   | 14     | 45     | 58    | 13      | 46      | A    | 0           | 165642.327   | -0.097                     | 458.7394  |
| 58   | 14     | 45     | 58    | 13      | 46      | E    | 0           | 165644.570   | -0.032                     | 458.7414  |
| 49   | 9      | 40     | 49    | 8       | 41      | E    | 1           | 165650.161   | 0.092                      | 464.8239  |
| 16   | 15     | 2      | 16    | 14      | 3       | A    | 0           | 165670.037   | 0.209                      | 132.5336  |
| 16   | 15     | 1      | 16    | 14      | 2       | A    | 0           | 165670.037   | 0.209                      | 132.5336  |
| 53   | 17     | 37     | 53    | 16      | 38      | E    | 0           | 165741.728   | 0.036                      | 414.5665  |
| 49   | 9      | 40     | 49    | 8       | 41      | E    | 0           | 165821.804   | -0.026                     | 336.5219  |
| 43   | 7      | 37     | 43    | 6       | 38      | E    | 1           | 165830.665   | -0.037                     | 392.9357  |
| 53   | 17     | 37     | 53    | 16      | 38      | A    | 0           | 165846.429   | 0.051                      | 414.5669  |
| 43   | 6      | 37     | 43    | 5       | 38      | E    | 0           | 165846.429   | -0.101                     | 264.6189  |
| 43   | 6      | 37     | 43    | 5       | 38      | A    | 0           | 165862.675   | 0.069                      | 264.6124  |
| 43   | 7      | 37     | 43    | 6       | 38      | A    | 0           | 165866.014   | 0.059                      | 264.6124  |
| 27   | 6      | 22     | 26    | 6       | 21      | A    | 1           | 165878.844   | 0.022                      | 275.8061  |
| 15   | 7      | 8      | 14    | 6       | 8       | E    | 0           | 165910.216   | -0.050                     | 95.8291   |
| 28   | 4      | 24     | 27    | 5       | 23      | A    | 1           | 165919.641   | 0.012                      | 278.2475  |
| 15   | 7      | 9      | 14    | 6       | 9       | E    | 0           | 165971.630   | -0.043                     | 95.8173   |
| 49   | 10     | 40     | 49    | 9       | 41      | E    | 0           | 165992.210   | -0.033                     | 336.5224  |
| 49   | 10     | 40     | 49    | 9       | 41      | A    | 0           | 165998.732   | -0.086                     | 336.5182  |
| 43   | 16     | 27     | 43    | 15      | 28      | E    | 0           | 166012.965   | -0.045                     | 306.4551  |
| 43   | 16     | 28     | 43    | 15      | 29      | E    | 0           | 166019.129   | 0.003                      | 306.4423  |
| 27   | 6      | 22     | 26    | 6       | 21      | E    | 0           | 166025.275   | -0.070                     | 147.1849  |
| 27   | 6      | 22     | 26    | 6       | 21      | A    | 0           | 166029.148   | 0.050                      | 147.1758  |
| 28   | 4      | 24     | 27    | 5       | 23      | E    | 0           | 166051.210   | -0.001                     | 149.6207  |
| 28   | 4      | 24     | 27    | 5       | 23      | A    | 0           | 166054.480   | -0.032                     | 149.6115  |
| 28   | 5      | 24     | 27    | 5       | 23      | A    | 1           | 166060.699   | 0.008                      | 278.2475  |
| 29   | 3      | 26     | 28    | 4       | 25      | A    | 1           | 166066.928   | 0.017                      | 280.1988  |
| 29   | 4      | 26     | 28    | 4       | 25      | A    | 1           | 166071.370   | 0.027                      | 280.1988  |
| 29   | 3      | 26     | 28    | 3       | 25      | A    | 1           | 166075.438   | -0.008                     | 280.1985  |
| 29   | 4      | 26     | 28    | 3       | 25      | A    | 1           | 166079.893   | 0.015                      | 280.1985  |
| 43   | 16     | 28     | 43    | 15      | 29      | A    | 0           | 166093.837   | -0.031                     | 306.4480  |
| 65   | 18     | 48     | 65    | 17      | 49      | E    | 0           | 166099.384   | 0.045                      | 572.7326  |
| 15   | 7      | 8      | 14    | 6       | 9       | A    | 0           | 166110.232   | 0.006                      | 95.8098   |
| 29   | 3      | 26     | 28    | 4       | 25      | E    | 1           | 166164.586   | -0.066                     | 279.8933  |
| 29   | 4      | 26     | 28    | 4       | 25      | E    | 1           | 166169.601   | -0.057                     | 279.8933  |
| 28   | 4      | 24     | 27    | 4       | 23      | A    | 1           | 166172.505   | 0.070                      | 278.2390  |
| 29   | 3      | 26     | 28    | 3       | 25      | E    | 1           | 166174.199   | -0.031                     | 279.8930  |
| 29   | 4      | 26     | 28    | 3       | 25      | E    | 1           | 166179.001   | -0.235                     | 279.8930  |
| 29   | 3      | 26     | 28    | 4       | 25      | E    | 0           | 166186.108   | -0.007                     | 151.5634  |
| 29   | 3      | 26     | 28    | 4       | 25      | A    | 0           | 166189.090   | -0.020                     | 151.5539  |
| 29   | 4      | 26     | 28    | 4       | 25      | E    | 0           | 166190.960   | 0.059                      | 151.5634  |
| 29   | 4      | 26     | 28    | 4       | 25      | A    | 0           | 166193.929   | 0.012                      | 151.5539  |
| 30   | 2      | 28     | 29    | 2       | 27      | A    | 1           | 166195.950   | -0.049                     | 281.6832  |
| 30   | 2      | 28     | 29    | 3       | 27      | A    | 1           | 166195.950   | 0.118                      | 281.6832  |
| 30   | 3      | 28     | 29    | 2       | 27      | A    | 1           | 166195.950   | -0.130                     | 281.6832  |
| 30   | 3      | 28     | 29    | 3       | 27      | A    | 1           | 166195.950   | 0.036                      | 281.6832  |
| 29   | 3      | 26     | 28    | 3       | 25      | A    | 0           | 166198.237   | -0.094                     | 151.5536  |
| 29   | 4      | 26     | 28    | 3       | 25      | E    | 0           | 166200.137   | 0.053                      | 151.5631  |
| 29   | 4      | 26     | 28    | 3       | 25      | A    | 0           | 166203.125   | -0.013                     | 151.5536  |
| 28   | 5      | 24     | 27    | 5       | 23      | A    | 0           | 166205.527   | 0.011                      | 149.6115  |
| 47   | 8      | 39     | 47    | 7       | 40      | E    | 1           | 166254.231   | 0.118                      | 439.8253  |
| 30   | 2      | 28     | 29    | 2       | 27      | E    | 1           | 166265.902   | -0.078                     | 281.3618  |
| 30   | 2      | 28     | 29    | 3       | 27      | E    | 1           | 166265.902   | 0.113                      | 281.3619  |



| $J'$ | $K'_a$ | $K'_c$ | $J''$ | $K''_a$ | $K''_c$ | Sym. | $v_{tCH_3}$ | $\nu_{Obs.}$ | $\nu_{Obs.} - \nu_{Calc.}$ | $E_{low}$ |
|------|--------|--------|-------|---------|---------|------|-------------|--------------|----------------------------|-----------|
| 30   | 3      | 28     | 29    | 2       | 27      | E    | 1           | 166265.902   | -0.172                     | 281.3618  |
| 30   | 3      | 28     | 29    | 3       | 27      | E    | 1           | 166265.902   | 0.018                      | 281.3619  |
| 45   | 7      | 38     | 45    | 6       | 39      | E    | 1           | 166279.575   | -0.019                     | 415.8591  |
| 30   | 2      | 28     | 29    | 2       | 27      | E    | 0           | 166293.642   | -0.069                     | 153.0348  |
| 30   | 3      | 28     | 29    | 3       | 27      | E    | 0           | 166293.642   | 0.023                      | 153.0348  |
| 30   | 2      | 28     | 29    | 2       | 27      | A    | 0           | 166295.798   | -0.059                     | 153.0248  |
| 30   | 2      | 28     | 29    | 3       | 27      | A    | 0           | 166295.798   | 0.123                      | 153.0248  |
| 30   | 3      | 28     | 29    | 2       | 27      | A    | 0           | 166295.798   | -0.149                     | 153.0248  |
| 30   | 3      | 28     | 29    | 3       | 27      | A    | 0           | 166295.798   | 0.033                      | 153.0248  |
| 38   | 3      | 35     | 38    | 2       | 36      | A    | 1           | 166303.785   | 0.056                      | 337.7314  |
| 38   | 4      | 35     | 38    | 3       | 36      | A    | 1           | 166303.785   | 0.047                      | 337.7314  |
| 47   | 9      | 39     | 47    | 8       | 40      | E    | 1           | 166308.362   | -0.019                     | 439.8254  |
| 28   | 4      | 24     | 27    | 4       | 23      | E    | 1           | 166309.468   | 0.002                      | 277.9422  |
| 28   | 5      | 24     | 27    | 4       | 23      | A    | 1           | 166313.526   | 0.029                      | 278.2390  |
| 28   | 4      | 24     | 27    | 4       | 23      | E    | 0           | 166319.858   | -0.064                     | 149.6117  |
| 28   | 4      | 24     | 27    | 4       | 23      | A    | 0           | 166324.121   | -0.046                     | 149.6025  |
| 45   | 7      | 38     | 45    | 6       | 39      | E    | 0           | 166343.830   | -0.000                     | 287.5456  |
| 47   | 8      | 39     | 47    | 7       | 40      | E    | 0           | 166368.078   | -0.014                     | 311.5166  |
| 45   | 8      | 38     | 45    | 7       | 39      | A    | 0           | 166370.639   | -0.014                     | 287.5399  |
| 47   | 8      | 39     | 47    | 7       | 40      | A    | 0           | 166377.695   | -0.029                     | 311.5117  |
| 31   | 1      | 30     | 30    | 1       | 29      | A    | 1           | 166383.609   | 0.009                      | 282.7335  |
| 31   | 1      | 30     | 30    | 2       | 29      | A    | 1           | 166383.609   | 0.011                      | 282.7335  |
| 31   | 2      | 30     | 30    | 1       | 29      | A    | 1           | 166383.609   | 0.009                      | 282.7335  |
| 31   | 2      | 30     | 30    | 2       | 29      | A    | 1           | 166383.609   | 0.010                      | 282.7335  |
| 47   | 9      | 39     | 47    | 8       | 40      | E    | 0           | 166418.846   | -0.064                     | 311.5168  |
| 31   | 1      | 30     | 30    | 1       | 29      | E    | 1           | 166425.346   | -0.026                     | 282.3905  |
| 31   | 1      | 30     | 30    | 2       | 29      | E    | 1           | 166425.346   | -0.024                     | 282.3905  |
| 31   | 2      | 30     | 30    | 1       | 29      | E    | 1           | 166425.346   | -0.027                     | 282.3905  |
| 31   | 2      | 30     | 30    | 2       | 29      | E    | 1           | 166425.346   | -0.025                     | 282.3905  |
| 47   | 9      | 39     | 47    | 8       | 40      | A    | 0           | 166428.756   | -0.046                     | 311.5118  |
| 31   | 1      | 30     | 30    | 2       | 29      | E    | 0           | 166459.290   | 0.018                      | 154.0680  |
| 31   | 2      | 30     | 30    | 1       | 29      | E    | 0           | 166459.290   | 0.015                      | 154.0680  |
| 31   | 1      | 30     | 30    | 1       | 29      | A    | 0           | 166460.517   | -0.040                     | 154.0573  |
| 31   | 1      | 30     | 30    | 2       | 29      | A    | 0           | 166460.517   | -0.038                     | 154.0573  |
| 31   | 2      | 30     | 30    | 1       | 29      | A    | 0           | 166460.517   | -0.040                     | 154.0573  |
| 31   | 2      | 30     | 30    | 2       | 29      | A    | 0           | 166460.517   | -0.038                     | 154.0573  |
| 28   | 5      | 24     | 27    | 4       | 23      | E    | 1           | 166465.494   | -0.035                     | 277.9422  |
| 28   | 5      | 24     | 27    | 4       | 23      | E    | 0           | 166470.370   | 0.002                      | 149.6117  |
| 28   | 5      | 24     | 27    | 4       | 23      | A    | 0           | 166475.170   | -0.000                     | 149.6025  |
| 32   | 0      | 32     | 31    | 0       | 31      | A    | 1           | 166597.164   | 0.026                      | 283.3710  |
| 32   | 0      | 32     | 31    | 1       | 31      | A    | 1           | 166597.164   | 0.026                      | 283.3710  |
| 32   | 1      | 32     | 31    | 0       | 31      | A    | 1           | 166597.164   | 0.026                      | 283.3710  |
| 32   | 1      | 32     | 31    | 1       | 31      | A    | 1           | 166597.164   | 0.026                      | 283.3710  |
| 32   | 0      | 32     | 31    | 0       | 31      | E    | 1           | 166609.221   | -0.028                     | 283.0004  |
| 32   | 1      | 32     | 31    | 1       | 31      | E    | 1           | 166609.221   | -0.028                     | 283.0004  |
| 32   | 0      | 32     | 31    | 0       | 31      | A    | 0           | 166649.800   | -0.206                     | 154.6725  |
| 32   | 0      | 32     | 31    | 1       | 31      | A    | 0           | 166649.800   | -0.206                     | 154.6725  |
| 32   | 1      | 32     | 31    | 0       | 31      | A    | 0           | 166649.800   | -0.206                     | 154.6725  |
| 32   | 1      | 32     | 31    | 1       | 31      | A    | 0           | 166649.800   | -0.206                     | 154.6725  |
| 32   | 0      | 32     | 31    | 0       | 31      | E    | 0           | 166649.800   | 0.171                      | 154.6840  |
| 32   | 1      | 32     | 31    | 1       | 31      | E    | 0           | 166649.800   | 0.171                      | 154.6840  |
| 27   | 18     | 9      | 26    | 18      | 8       | A    | 0           | 166731.057   | -0.156                     | 201.1112  |
| 27   | 18     | 10     | 26    | 18      | 9       | A    | 0           | 166731.057   | -0.156                     | 201.1112  |
| 27   | 18     | 9      | 26    | 18      | 8       | E    | 0           | 166731.804   | 0.022                      | 201.1116  |
| 27   | 17     | 11     | 26    | 17      | 10      | A    | 0           | 166890.151   | -0.132                     | 194.4650  |
| 27   | 17     | 10     | 26    | 17      | 9       | A    | 0           | 166890.151   | -0.132                     | 194.4650  |
| 27   | 17     | 11     | 26    | 17      | 10      | E    | 0           | 166891.092   | 0.004                      | 194.4542  |
| 26   | 6      | 21     | 25    | 5       | 20      | A    | 1           | 166908.053   | 0.122                      | 270.2387  |
| 35   | 1      | 34     | 35    | 0       | 35      | A    | 1           | 166926.570   | -0.452                     | 306.6257  |
| 35   | 2      | 34     | 35    | 1       | 35      | A    | 1           | 166926.570   | -0.452                     | 306.6257  |
| 38   | 3      | 35     | 38    | 2       | 36      | E    | 0           | 167010.863   | 0.061                      | 209.1138  |
| 38   | 4      | 35     | 38    | 3       | 36      | E    | 0           | 167010.863   | 0.051                      | 209.1138  |
| 38   | 3      | 35     | 38    | 2       | 36      | A    | 0           | 167035.660   | 0.079                      | 209.1044  |
| 38   | 4      | 35     | 38    | 3       | 36      | A    | 0           | 167035.660   | 0.069                      | 209.1044  |
| 38   | 3      | 35     | 38    | 2       | 36      | E    | 1           | 167110.727   | -0.038                     | 337.4307  |
| 38   | 4      | 35     | 38    | 3       | 36      | E    | 1           | 167110.727   | -0.048                     | 337.4307  |
| 42   | 16     | 26     | 42    | 15      | 27      | E    | 0           | 167134.059   | -0.047                     | 297.4009  |
| 42   | 16     | 27     | 42    | 15      | 28      | E    | 0           | 167136.824   | -0.017                     | 297.3881  |
| 42   | 16     | 26     | 42    | 15      | 27      | A    | 0           | 167165.685   | 0.023                      | 297.3956  |
| 61   | 18     | 44     | 61    | 17      | 45      | E    | 0           | 167176.816   | 0.029                      | 518.2751  |
| 42   | 16     | 27     | 42    | 15      | 28      | A    | 0           | 167197.490   | -0.044                     | 297.3944  |
| 27   | 15     | 13     | 26    | 15      | 12      | A    | 0           | 167310.409   | -0.068                     | 182.3379  |
| 27   | 15     | 12     | 26    | 15      | 11      | A    | 0           | 167310.409   | -0.068                     | 182.3379  |
| 26   | 6      | 21     | 25    | 5       | 20      | E    | 0           | 167322.178   | -0.015                     | 141.6036  |
| 26   | 6      | 21     | 25    | 5       | 20      | A    | 0           | 167341.665   | 0.008                      | 141.5939  |
| 27   | 5      | 22     | 26    | 5       | 21      | A    | 1           | 167417.288   | 0.126                      | 275.6698  |
| 59   | 13     | 46     | 59    | 12      | 47      | A    | 0           | 167472.108   | -0.106                     | 470.9535  |
| 59   | 13     | 46     | 59    | 12      | 47      | E    | 0           | 167490.082   | -0.024                     | 470.9553  |
| 52   | 17     | 36     | 52    | 16      | 37      | E    | 0           | 167517.417   | 0.029                      | 403.2758  |
| 26   | 8      | 18     | 25    | 8       | 17      | A    | 0           | 167572.078   | -0.002                     | 147.2281  |
| 56   | 13     | 44     | 56    | 12      | 45      | A    | 0           | 167573.482   | -0.117                     | 429.1784  |
| 56   | 13     | 44     | 56    | 12      | 45      | E    | 0           | 167575.071   | -0.039                     | 429.1807  |
| 26   | 8      | 18     | 25    | 8       | 17      | E    | 0           | 167576.212   | 0.028                      | 147.2363  |
| 27   | 14     | 13     | 26    | 14      | 12      | A    | 0           | 167593.690   | -0.087                     | 176.8615  |
| 27   | 14     | 14     | 26    | 14      | 13      | A    | 0           | 167593.690   | -0.086                     | 176.8615  |
| 27   | 14     | 13     | 26    | 14      | 12      | E    | 0           | 167594.526   | 0.038                      | 176.8680  |
| 27   | 5      | 22     | 26    | 5       | 21      | E    | 0           | 167626.871   | 0.044                      | 147.0420  |
| 27   | 5      | 22     | 26    | 5       | 21      | A    | 0           | 167634.237   | -0.014                     | 147.0326  |
| 52   | 17     | 36     | 52    | 16      | 37      | A    | 0           | 167645.934   | 0.059                      | 403.2767  |
| 58   | 18     | 40     | 58    | 17      | 41      | E    | 0           | 167652.547   | -0.038                     | 479.9082  |
| 58   | 18     | 40     | 58    | 17      | 41      | A    | 0           | 167693.099   | -0.012                     | 479.9081  |
| 35   | 1      | 34     | 35    | 0       | 35      | E    | 0           | 167742.759   | 0.053                      | 177.9459  |
| 35   | 2      | 34     | 35    | 1       | 35      | E    | 0           | 167742.759   | 0.053                      | 177.9459  |
| 63   | 16     | 48     | 63    | 15      | 49      | E    | 0           | 167893.273   | -0.023                     | 534.1025  |
| 35   | 1      | 34     | 35    | 0       | 35      | E    | 1           | 167913.414   | 0.049                      | 306.2567  |
| 35   | 2      | 34     | 35    | 1       | 35      | E    | 1           | 167913.414   | 0.049                      | 306.2567  |
| 27   | 13     | 15     | 26    | 13      | 14      | A    | 0           | 167949.350   | -0.033                     | 171.7808  |
| 27   | 13     | 14     | 26    | 13      | 13      | E    | 0           | 167950.267   | 0.153                      | 171.7887  |
| 27   | 13     | 15     | 26    | 13      | 14      | E    | 0           | 167951.252   | -0.022                     | 171.7752  |
| 40   | 4      | 36     | 40    | 3       | 37      | A    | 1           | 168006.597   | 0.401                      | 357.9448  |
| 40   | 5      | 36     | 40    | 4       | 37      | A    | 1           | 168006.597   | 0.341                      | 357.9448  |
| 41   | 16     | 25     | 41    | 15      | 26      | E    | 0           | 168152.227   | -0.052                     | 288.5711  |
| 41   | 16     | 26     | 41    | 15      | 27      | E    | 0           | 168154.811   | -0.002                     | 288.5583  |
| 41   | 16     | 25     | 41    | 15      | 26      | A    | 0           | 168191.103   | 0.037                      | 288.5656  |
| 41   | 16     | 26     | 41    | 15      | 27      | A    | 0           | 168206.997   | -0.065                     | 288.5650  |
| 51   | 17     | 34     | 51    | 16      | 35      | A    | 0           | 168521.817   | -0.025                     | 392.2509  |
| 51   | 17     | 34     | 51    | 16      | 35      | E    | 0           | 168564.114   | -0.103                     | 392.2515  |
| 60   | 18     | 43     | 60    | 17      | 44      | E    | 0           | 168640.654   | 0.028                      | 505.1989  |
| 40   | 4      | 36     | 40    | 3       | 37      | E    | 0           | 168666.400   | 0.066                      | 229.3594  |
| 40   | 5      | 36     | 40    | 4       | 37      | E    | 0           | 168666.400   | -0.001                     | 229.3594  |
| 40   | 4      | 36     | 40    | 3       | 37      | A    | 0           | 168688.711   | 0.098                      | 229.3511  |
| 40   | 5      | 36     | 40    | 4       | 37      | A    | 0           | 168688.711   | 0.030                      | 229.3511  |
| 60   | 18     | 43     | 60    | 17      | 44      | A    | 0           | 168697.621   | -0.049                     | 505.1990  |
| 40   | 4      | 36     | 40    | 3       | 37      | E    | 1           | 168729.899   | -0.040                     | 357.6771  |
| 40   | 5      | 36     | 40    | 4       | 37      | E    | 1           | 168729.899   | -0.112                     | 357.6771  |
| 62   | 14     | 48     | 62    | 13      | 49      | E    | 0           | 169000.731   | -0.009                     | 514.9421  |



| $J'$ | $K'_a$ | $K'_c$ | $J''$ | $K''_a$ | $K''_c$ | Sym. | $v_{tCH_3}$ | $\nu_{Obs.}$ | $\nu_{Obs.} - \nu_{Calc.}$ | $E_{low}$ |
|------|--------|--------|-------|---------|---------|------|-------------|--------------|----------------------------|-----------|
| 27   | 11     | 16     | 26    | 11      | 15      | E    | 0           | 169016.867   | 0.058                      | 162.8420  |
| 27   | 11     | 17     | 26    | 11      | 16      | E    | 0           | 169018.962   | -0.078                     | 162.8293  |
| 27   | 11     | 16     | 26    | 11      | 15      | A    | 0           | 169020.042   | 0.049                      | 162.8318  |
| 68   | 16     | 52     | 68    | 15      | 53      | E    | 0           | 169055.052   | 0.016                      | 609.4866  |
| 40   | 16     | 24     | 40    | 15      | 25      | E    | 0           | 169078.786   | -0.031                     | 279.9645  |
| 40   | 16     | 25     | 40    | 15      | 26      | E    | 0           | 169081.951   | 0.014                      | 279.9516  |
| 40   | 16     | 25     | 40    | 15      | 26      | A    | 0           | 169129.174   | -0.095                     | 279.9586  |
| 37   | 2      | 35     | 37    | 1       | 36      | A    | 1           | 169226.935   | -0.174                     | 325.1751  |
| 37   | 3      | 35     | 37    | 2       | 36      | A    | 1           | 169226.935   | -0.174                     | 325.1751  |
| 54   | 12     | 43     | 54    | 11      | 44      | E    | 0           | 169314.467   | -0.141                     | 400.6135  |
| 54   | 12     | 43     | 54    | 11      | 44      | A    | 0           | 169315.426   | 0.002                      | 400.6107  |
| 61   | 15     | 47     | 61    | 14      | 48      | A    | 0           | 169320.130   | -0.046                     | 502.0485  |
| 61   | 15     | 47     | 61    | 14      | 48      | E    | 0           | 169322.565   | -0.034                     | 502.0499  |
| 51   | 17     | 35     | 51    | 16      | 36      | A    | 0           | 169384.358   | -0.019                     | 392.2182  |
| 28   | 5      | 23     | 27    | 6       | 22      | A    | 1           | 169571.645   | -0.012                     | 281.3392  |
| 28   | 5      | 23     | 27    | 6       | 22      | E    | 1           | 169579.778   | -0.083                     | 281.0522  |
| 28   | 5      | 23     | 27    | 6       | 22      | A    | 0           | 169636.979   | -0.022                     | 152.7139  |
| 28   | 5      | 23     | 27    | 6       | 22      | E    | 0           | 169638.091   | 0.019                      | 152.7229  |
| 67   | 18     | 50     | 67    | 17      | 51      | E    | 0           | 169704.213   | -0.002                     | 601.1635  |
| 67   | 18     | 50     | 67    | 17      | 51      | A    | 0           | 169722.184   | -0.109                     | 601.1630  |
| 27   | 7      | 21     | 26    | 7       | 20      | E    | 0           | 169750.003   | -0.003                     | 149.8846  |
| 27   | 7      | 21     | 26    | 7       | 20      | A    | 0           | 169751.736   | 0.009                      | 149.8761  |
| 27   | 10     | 18     | 26    | 10      | 17      | A    | 0           | 169821.364   | 0.003                      | 158.9842  |
| 27   | 10     | 18     | 26    | 10      | 17      | E    | 0           | 169855.951   | -0.013                     | 158.9848  |
| 17   | 6      | 11     | 16    | 5       | 12      | E    | 0           | 169873.347   | -0.000                     | 100.2720  |
| 17   | 6      | 11     | 16    | 5       | 12      | A    | 0           | 169884.341   | 0.048                      | 100.2619  |
| 27   | 10     | 17     | 26    | 10      | 16      | E    | 0           | 169886.438   | 0.066                      | 158.9971  |
| 27   | 10     | 17     | 26    | 10      | 16      | A    | 0           | 169916.439   | 0.141                      | 158.9871  |
| 39   | 16     | 23     | 39    | 15      | 24      | E    | 0           | 169922.674   | -0.024                     | 271.5797  |
| 39   | 16     | 24     | 39    | 15      | 25      | E    | 0           | 169926.547   | 0.004                      | 271.5668  |
| 7    | 2      | 5      | 7     | 1       | 6       | A    | 1           | 16994.087    | -0.007                     | 202.1801  |
| 27   | 6      | 22     | 26    | 5       | 21      | A    | 1           | 169965.130   | 0.129                      | 275.6698  |
| 39   | 16     | 23     | 39    | 15      | 24      | A    | 0           | 169967.322   | 0.083                      | 271.5742  |
| 39   | 16     | 24     | 39    | 15      | 25      | A    | 0           | 169970.878   | -0.100                     | 271.5740  |
| 42   | 5      | 37     | 42    | 4       | 38      | E    | 0           | 169996.344   | 0.203                      | 250.6777  |
| 42   | 6      | 37     | 42    | 5       | 38      | E    | 0           | 169996.344   | -0.169                     | 250.6777  |
| 37   | 2      | 35     | 37    | 1       | 36      | E    | 0           | 170000.790   | 0.045                      | 196.5281  |
| 37   | 3      | 35     | 37    | 2       | 36      | E    | 0           | 170000.790   | 0.044                      | 196.5281  |
| 42   | 5      | 37     | 42    | 4       | 38      | A    | 0           | 170015.962   | -0.212                     | 250.6704  |
| 42   | 6      | 37     | 42    | 5       | 38      | A    | 0           | 170015.962   | -0.163                     | 250.6704  |
| 10   | 10     | 1      | 9     | 9       | 1       | E    | 0           | 170081.684   | -0.007                     | 91.9310   |
| 10   | 10     | 0      | 9     | 9       | 0       | E    | 0           | 170103.480   | 0.013                      | 91.9428   |
| 10   | 10     | 0      | 9     | 9       | 1       | A    | 0           | 170129.199   | 0.020                      | 91.9308   |
| 10   | 10     | 1      | 9     | 9       | 0       | A    | 0           | 170129.199   | 0.020                      | 91.9308   |
| 37   | 2      | 35     | 37    | 1       | 36      | E    | 1           | 170138.836   | -0.034                     | 324.8417  |
| 37   | 3      | 35     | 37    | 2       | 36      | E    | 1           | 170138.836   | -0.034                     | 324.8417  |
| 63   | 19     | 44     | 63    | 18      | 45      | E    | 0           | 170283.851   | -0.022                     | 550.9338  |
| 27   | 6      | 22     | 26    | 5       | 21      | E    | 0           | 170307.737   | -0.018                     | 147.0420  |
| 52   | 10     | 42     | 52    | 9       | 43      | E    | 0           | 170314.293   | -0.025                     | 373.0494  |
| 52   | 10     | 42     | 52    | 9       | 43      | A    | 0           | 170316.712   | -0.050                     | 373.0460  |
| 27   | 6      | 22     | 26    | 5       | 21      | A    | 0           | 170322.989   | -0.052                     | 147.0326  |
| 26   | 6      | 20     | 25    | 6       | 19      | E    | 0           | 170323.797   | 0.061                      | 143.4969  |
| 26   | 6      | 20     | 25    | 6       | 19      | A    | 0           | 170329.301   | 0.003                      | 143.4869  |
| 63   | 19     | 44     | 63    | 18      | 45      | A    | 0           | 170346.537   | -0.030                     | 550.9337  |
| 59   | 18     | 42     | 59    | 17      | 43      | E    | 0           | 170351.798   | 0.002                      | 492.3481  |
| 27   | 6      | 22     | 26    | 5       | 21      | E    | 1           | 170398.037   | 0.111                      | 275.3683  |
| 52   | 11     | 42     | 52    | 10      | 43      | E    | 1           | 170420.378   | 0.229                      | 501.3427  |
| 50   | 17     | 33     | 50    | 16      | 34      | A    | 0           | 170539.045   | -0.045                     | 381.4096  |
| 35   | 9      | 26     | 34    | 10      | 25      | A    | 0           | 170570.144   | -0.040                     | 210.5355  |
| 50   | 17     | 33     | 50    | 16      | 34      | E    | 0           | 170584.717   | -0.086                     | 381.4106  |
| 52   | 11     | 42     | 52    | 10      | 43      | E    | 0           | 170627.284   | -0.049                     | 373.0506  |
| 52   | 11     | 42     | 52    | 10      | 43      | A    | 0           | 170631.196   | -0.070                     | 373.0472  |
| 35   | 9      | 26     | 34    | 10      | 25      | E    | 0           | 170649.460   | 0.048                      | 210.5414  |
| 38   | 16     | 22     | 38    | 15      | 23      | E    | 0           | 170691.471   | -0.043                     | 263.4157  |
| 55   | 17     | 39     | 54    | 18      | 36      | A    | 0           | 170693.855   | 0.056                      | 437.5591  |
| 38   | 16     | 23     | 38    | 15      | 24      | E    | 0           | 170696.056   | -0.002                     | 263.4027  |
| 38   | 16     | 22     | 38    | 15      | 23      | A    | 0           | 170737.061   | 0.094                      | 263.4102  |
| 38   | 16     | 23     | 38    | 15      | 24      | A    | 0           | 170738.579   | -0.126                     | 263.4102  |
| 27   | 9      | 19     | 26    | 9       | 18      | A    | 0           | 170765.835   | 0.033                      | 155.5738  |
| 27   | 9      | 19     | 26    | 9       | 18      | E    | 0           | 170780.562   | -0.001                     | 155.5796  |
| 7    | 2      | 5      | 7     | 1       | 6       | E    | 0           | 17081.438    | -0.012                     | 73.4661   |
| 7    | 2      | 5      | 7     | 1       | 6       | A    | 0           | 17084.659    | -0.002                     | 73.4543   |
| 50   | 17     | 34     | 50    | 16      | 35      | E    | 0           | 170889.113   | 0.061                      | 381.3885  |
| 59   | 19     | 40     | 58    | 20      | 39      | A    | 0           | 170926.727   | -0.074                     | 498.5576  |
| 12   | 9      | 4      | 11    | 8       | 4       | E    | 0           | 170930.714   | 0.014                      | 93.0117   |
| 12   | 9      | 3      | 11    | 8       | 3       | E    | 0           | 170957.297   | -0.035                     | 93.0227   |
| 12   | 9      | 3      | 11    | 8       | 4       | A    | 0           | 170978.190   | 0.006                      | 93.0099   |
| 44   | 6      | 38     | 44    | 5       | 39      | A    | 0           | 170989.238   | 0.009                      | 273.0538  |
| 44   | 7      | 38     | 44    | 6       | 39      | A    | 0           | 170991.122   | 0.094                      | 273.0538  |
| 50   | 17     | 34     | 50    | 16      | 35      | A    | 0           | 171034.762   | -0.033                     | 381.3910  |
| 29   | 4      | 25     | 28    | 5       | 24      | A    | 1           | 171091.594   | 0.024                      | 283.7866  |
| 28   | 6      | 23     | 27    | 6       | 22      | A    | 1           | 171119.686   | 0.039                      | 281.3392  |
| 29   | 5      | 25     | 28    | 5       | 24      | A    | 1           | 171169.253   | -0.031                     | 283.7866  |
| 50   | 9      | 41     | 50    | 8       | 42      | E    | 1           | 171170.625   | 0.040                      | 474.8034  |
| 27   | 8      | 20     | 26    | 8       | 19      | A    | 0           | 171182.098   | 0.004                      | 152.5834  |
| 27   | 8      | 20     | 26    | 8       | 19      | E    | 0           | 171184.106   | -0.015                     | 152.5911  |
| 30   | 3      | 27     | 29    | 4       | 26      | A    | 1           | 171186.094   | 0.017                      | 285.7384  |
| 30   | 4      | 27     | 29    | 4       | 26      | A    | 1           | 171188.451   | 0.090                      | 285.7384  |
| 30   | 3      | 27     | 29    | 3       | 26      | A    | 1           | 171190.568   | 0.059                      | 285.7382  |
| 30   | 4      | 27     | 29    | 3       | 26      | A    | 1           | 171192.769   | -0.025                     | 285.7382  |
| 29   | 4      | 25     | 28    | 5       | 24      | E    | 1           | 171209.254   | 0.009                      | 283.4949  |
| 29   | 4      | 25     | 28    | 5       | 24      | E    | 0           | 171228.374   | -0.018                     | 155.1646  |
| 29   | 4      | 25     | 28    | 5       | 24      | A    | 0           | 171231.879   | -0.051                     | 155.1555  |
| 39   | 3      | 36     | 39    | 2       | 37      | A    | 1           | 171253.860   | 0.048                      | 344.8139  |
| 39   | 4      | 36     | 39    | 3       | 37      | A    | 1           | 171253.860   | 0.044                      | 344.8139  |
| 28   | 6      | 23     | 27    | 6       | 22      | E    | 1           | 171264.062   | -0.029                     | 281.0522  |
| 28   | 6      | 23     | 27    | 6       | 22      | E    | 0           | 171273.131   | 0.043                      | 152.7229  |
| 28   | 6      | 23     | 27    | 6       | 22      | A    | 0           | 171277.050   | -0.129                     | 152.7139  |
| 30   | 3      | 27     | 29    | 4       | 26      | E    | 1           | 171283.294   | -0.040                     | 285.4361  |
| 30   | 4      | 27     | 29    | 4       | 26      | E    | 1           | 171285.871   | -0.058                     | 285.4361  |
| 30   | 3      | 27     | 29    | 3       | 26      | E    | 1           | 171288.289   | -0.050                     | 285.4359  |
| 30   | 4      | 27     | 29    | 3       | 26      | E    | 1           | 171290.837   | -0.098                     | 285.4359  |
| 30   | 3      | 27     | 29    | 4       | 26      | E    | 0           | 171306.386   | -0.006                     | 157.1069  |
| 30   | 3      | 27     | 29    | 4       | 26      | A    | 0           | 171309.298   | -0.076                     | 157.0975  |
| 30   | 4      | 27     | 29    | 3       | 26      | E    | 0           | 171313.670   | 0.018                      | 157.1068  |
| 30   | 4      | 27     | 29    | 3       | 26      | A    | 0           | 171316.646   | -0.021                     | 157.0974  |
| 59   | 14     | 46     | 59    | 13      | 47      | A    | 0           | 171317.941   | -0.122                     | 470.9755  |
| 31   | 2      | 29     | 30    | 2       | 28      | A    | 1           | 171321.088   | -0.011                     | 287.2269  |
| 31   | 2      | 29     | 30    | 3       | 28      | A    | 1           | 171321.088   | 0.071                      | 287.2269  |
| 31   | 3      | 29     | 30    | 2       | 28      | A    | 1           | 171321.088   | -0.051                     | 287.2269  |
| 31   | 3      | 29     | 30    | 3       | 28      | A    | 1           | 171321.088   | 0.031                      | 287.2269  |
| 50   | 9      | 41     | 50    | 8       | 42      | E    | 0           | 171333.387   | -0.053                     | 346.5029  |
| 57   | 18     | 39     | 57    | 17      | 40      | A    | 0           | 171334.447   | 0.050                      | 467.4483  |
| 50   | 9      | 41     | 50    | 8       | 42      | A    | 0           | 171340.167   | -0.056                     | 346.4988  |
| 29   | 4      | 25     | 28    | 4       | 24      | E    | 1           | 171365.314   | 0.007                      | 283.4896  |
| 29   | 4      | 25     | 28    | 4       | 24      | E    | 0           | 171378.824   | -0.014                     | 155.1596  |



| $J'$ | $K'_a$ | $K'_c$ | $J''$ | $K''_a$ | $K''_c$ | Sym. | $v_{tCH_3}$ | $\nu_{Obs.}$ | $\nu_{Obs.} - \nu_{Calc.}$ | $E_{low}$ |
|------|--------|--------|-------|---------|---------|------|-------------|--------------|----------------------------|-----------|
| 29   | 4      | 25     | 28    | 4       | 24      | A    | 0           | 171382.939   | 0.005                      | 155.1505  |
| 31   | 2      | 29     | 30    | 2       | 28      | E    | 1           | 171390.668   | -0.056                     | 286.9079  |
| 31   | 2      | 29     | 30    | 3       | 28      | E    | 1           | 171390.668   | 0.039                      | 286.9079  |
| 31   | 3      | 29     | 30    | 2       | 28      | E    | 1           | 171390.668   | -0.102                     | 286.9079  |
| 31   | 3      | 29     | 30    | 3       | 28      | E    | 1           | 171390.668   | -0.008                     | 286.9079  |
| 37   | 16     | 21     | 37    | 15      | 22      | E    | 0           | 171391.832   | -0.034                     | 255.4715  |
| 37   | 16     | 22     | 37    | 15      | 23      | E    | 0           | 171397.077   | 0.026                      | 255.4584  |
| 31   | 2      | 29     | 30    | 2       | 28      | E    | 0           | 171419.923   | -0.045                     | 158.5817  |
| 31   | 3      | 29     | 30    | 3       | 28      | E    | 0           | 171419.923   | 0.000                      | 158.5817  |
| 31   | 2      | 29     | 30    | 2       | 28      | A    | 0           | 171422.058   | -0.047                     | 158.5718  |
| 31   | 2      | 29     | 30    | 3       | 28      | A    | 0           | 171422.058   | 0.043                      | 158.5718  |
| 31   | 3      | 29     | 30    | 2       | 28      | A    | 0           | 171422.058   | -0.091                     | 158.5718  |
| 31   | 3      | 29     | 30    | 3       | 28      | A    | 0           | 171422.058   | -0.001                     | 158.5718  |
| 50   | 10     | 41     | 50    | 9       | 42      | E    | 0           | 171432.667   | -0.065                     | 346.5032  |
| 50   | 10     | 41     | 50    | 9       | 42      | A    | 0           | 171439.899   | -0.116                     | 346.4992  |
| 29   | 5      | 25     | 28    | 4       | 24      | E    | 1           | 171451.829   | -0.000                     | 283.4896  |
| 29   | 5      | 25     | 28    | 4       | 24      | E    | 0           | 171462.014   | 0.012                      | 155.1596  |
| 29   | 5      | 25     | 28    | 4       | 24      | A    | 0           | 171466.436   | 0.014                      | 155.1505  |
| 46   | 7      | 39     | 46    | 6       | 40      | E    | 1           | 171498.449   | -0.018                     | 424.8101  |
| 16   | 7      | 10     | 15    | 6       | 9       | A    | 0           | 171499.570   | 0.075                      | 98.9603   |
| 46   | 8      | 39     | 46    | 7       | 40      | E    | 1           | 171506.554   | -0.038                     | 424.8102  |
| 32   | 1      | 31     | 31    | 1       | 30      | A    | 1           | 171511.220   | -0.073                     | 288.2835  |
| 32   | 1      | 31     | 31    | 2       | 30      | A    | 1           | 171511.220   | -0.072                     | 288.2835  |
| 32   | 2      | 31     | 31    | 1       | 30      | A    | 1           | 171511.220   | -0.073                     | 288.2835  |
| 32   | 2      | 31     | 31    | 2       | 30      | A    | 1           | 171511.220   | -0.073                     | 288.2835  |
| 32   | 1      | 31     | 31    | 1       | 30      | E    | 1           | 171552.862   | -0.049                     | 287.9419  |
| 32   | 1      | 31     | 31    | 2       | 30      | E    | 1           | 171552.862   | -0.048                     | 287.9419  |
| 32   | 2      | 31     | 31    | 1       | 30      | E    | 1           | 171552.862   | -0.050                     | 287.9419  |
| 32   | 2      | 31     | 31    | 2       | 30      | E    | 1           | 171552.862   | -0.049                     | 287.9419  |
| 46   | 7      | 39     | 46    | 6       | 40      | E    | 0           | 171558.901   | -0.029                     | 296.4981  |
| 27   | 9      | 18     | 26    | 9       | 17      | A    | 0           | 171582.529   | 0.043                      | 155.6059  |
| 32   | 1      | 31     | 31    | 1       | 30      | E    | 0           | 171588.249   | 0.023                      | 159.6205  |
| 32   | 2      | 31     | 31    | 2       | 30      | E    | 0           | 171588.249   | 0.024                      | 159.6205  |
| 32   | 1      | 31     | 31    | 1       | 30      | A    | 0           | 171589.486   | -0.018                     | 159.6098  |
| 32   | 1      | 31     | 31    | 2       | 30      | A    | 0           | 171589.486   | -0.017                     | 159.6098  |
| 32   | 2      | 31     | 31    | 1       | 30      | A    | 0           | 171589.486   | -0.019                     | 159.6098  |
| 32   | 2      | 31     | 31    | 2       | 30      | A    | 0           | 171589.486   | -0.018                     | 159.6098  |
| 48   | 8      | 40     | 48    | 7       | 41      | E    | 1           | 171596.447   | 0.103                      | 449.2894  |
| 48   | 9      | 40     | 48    | 8       | 41      | E    | 1           | 171627.187   | 0.005                      | 449.2895  |
| 16   | 7      | 9      | 15    | 6       | 9       | E    | 0           | 171637.617   | -0.029                     | 98.9705   |
| 14   | 8      | 7      | 13    | 7       | 7       | E    | 0           | 171647.274   | 0.020                      | 95.3340   |
| 14   | 8      | 6      | 13    | 7       | 6       | E    | 0           | 171678.710   | -0.071                     | 95.3438   |
| 14   | 8      | 7      | 13    | 7       | 6       | A    | 0           | 171691.839   | -0.061                     | 95.3307   |
| 48   | 8      | 40     | 48    | 7       | 41      | E    | 0           | 171704.898   | -0.031                     | 320.9822  |
| 26   | 7      | 19     | 25    | 7       | 18      | E    | 0           | 171719.454   | 0.079                      | 145.0948  |
| 33   | 0      | 33     | 32    | 0       | 32      | A    | 1           | 171725.515   | 0.074                      | 288.9281  |
| 33   | 0      | 33     | 32    | 1       | 32      | A    | 1           | 171725.515   | 0.074                      | 288.9281  |
| 33   | 1      | 33     | 32    | 0       | 32      | A    | 1           | 171725.515   | 0.074                      | 288.9281  |
| 33   | 1      | 33     | 32    | 1       | 32      | A    | 1           | 171725.515   | 0.074                      | 288.9281  |
| 33   | 0      | 33     | 32    | 0       | 32      | E    | 1           | 171737.441   | -0.011                     | 288.5579  |
| 33   | 1      | 33     | 32    | 1       | 32      | E    | 1           | 171737.441   | -0.011                     | 288.5579  |
| 33   | 0      | 33     | 32    | 0       | 32      | A    | 0           | 171779.360   | -0.206                     | 160.2313  |
| 33   | 0      | 33     | 32    | 1       | 32      | A    | 0           | 171779.360   | -0.206                     | 160.2313  |
| 33   | 1      | 33     | 32    | 0       | 32      | A    | 0           | 171779.360   | -0.206                     | 160.2313  |
| 33   | 1      | 33     | 32    | 1       | 32      | A    | 0           | 171779.360   | -0.206                     | 160.2313  |
| 33   | 0      | 33     | 32    | 0       | 32      | E    | 0           | 171779.360   | 0.168                      | 160.2428  |
| 33   | 1      | 33     | 32    | 1       | 32      | E    | 0           | 171779.360   | 0.168                      | 160.2428  |
| 57   | 12     | 45     | 57    | 11      | 46      | A    | 0           | 171793.378   | -0.121                     | 440.8812  |
| 57   | 12     | 45     | 57    | 11      | 46      | E    | 0           | 171801.428   | -0.031                     | 440.8834  |
| 36   | 1      | 35     | 36    | 0       | 36      | A    | 1           | 171838.304   | -0.488                     | 312.8670  |
| 36   | 2      | 35     | 36    | 1       | 36      | A    | 1           | 171838.304   | -0.488                     | 312.8670  |
| 39   | 3      | 36     | 39    | 2       | 37      | E    | 0           | 171982.154   | 0.000                      | 216.1999  |
| 39   | 4      | 36     | 39    | 3       | 37      | E    | 0           | 171982.154   | -0.004                     | 216.1999  |
| 39   | 3      | 36     | 39    | 2       | 37      | A    | 0           | 172007.796   | 0.103                      | 216.1906  |
| 39   | 4      | 36     | 39    | 3       | 37      | A    | 0           | 172007.796   | 0.098                      | 216.1906  |
| 36   | 16     | 20     | 36    | 15      | 21      | E    | 0           | 172029.508   | -0.072                     | 247.7459  |
| 36   | 16     | 21     | 36    | 15      | 22      | E    | 0           | 172035.326   | -0.018                     | 247.7327  |
| 36   | 16     | 21     | 36    | 15      | 22      | A    | 0           | 172075.777   | -0.155                     | 247.7405  |
| 39   | 3      | 36     | 39    | 2       | 37      | E    | 1           | 172085.500   | -0.046                     | 344.5154  |
| 39   | 4      | 36     | 39    | 3       | 37      | E    | 1           | 172085.500   | -0.051                     | 344.5154  |
| 28   | 5      | 23     | 27    | 5       | 22      | A    | 1           | 172119.549   | 0.053                      | 281.2543  |
| 16   | 7      | 9      | 15    | 6       | 10      | A    | 0           | 172137.135   | 0.028                      | 98.9419   |
| 58   | 18     | 41     | 58    | 17      | 42      | E    | 0           | 172205.205   | 0.069                      | 479.7262  |
| 58   | 18     | 41     | 58    | 17      | 42      | A    | 0           | 172280.352   | -0.027                     | 479.7269  |
| 49   | 17     | 32     | 49    | 16      | 33      | A    | 0           | 172303.757   | -0.019                     | 370.8046  |
| 28   | 5      | 23     | 27    | 5       | 22      | E    | 0           | 172319.002   | 0.001                      | 152.6334  |
| 28   | 5      | 23     | 27    | 5       | 22      | A    | 0           | 172325.766   | -0.025                     | 152.6243  |
| 28   | 5      | 23     | 27    | 5       | 22      | E    | 1           | 172331.599   | 0.006                      | 280.9604  |
| 49   | 17     | 32     | 49    | 16      | 33      | E    | 0           | 172335.364   | -0.096                     | 370.8064  |
| 7    | 2      | 5      | 7     | 1       | 6       | E    | 1           | 17245.898    | -0.034                     | 201.8020  |
| 49   | 17     | 33     | 49    | 16      | 34      | E    | 0           | 172453.016   | -0.009                     | 370.7906  |
| 49   | 17     | 33     | 49    | 16      | 34      | A    | 0           | 172582.408   | -0.031                     | 370.7942  |
| 35   | 16     | 19     | 35    | 15      | 20      | E    | 0           | 172609.778   | -0.067                     | 240.2382  |
| 35   | 16     | 20     | 35    | 15      | 21      | E    | 0           | 172616.097   | -0.036                     | 240.2249  |
| 35   | 16     | 19     | 35    | 15      | 20      | A    | 0           | 172655.949   | 0.061                      | 240.2328  |
| 36   | 1      | 35     | 36    | 0       | 36      | A    | 0           | 172710.092   | 0.115                      | 184.1777  |
| 36   | 2      | 35     | 36    | 1       | 36      | A    | 0           | 172710.092   | 0.115                      | 184.1777  |
| 41   | 4      | 37     | 41    | 3       | 38      | A    | 1           | 172990.809   | 0.333                      | 365.5342  |
| 41   | 5      | 37     | 41    | 4       | 38      | A    | 1           | 172990.809   | 0.302                      | 365.5342  |
| 64   | 16     | 49     | 64    | 15      | 50      | E    | 0           | 172993.684   | -0.017                     | 547.5597  |
| 28   | 18     | 10     | 27    | 18      | 9       | A    | 0           | 173005.237   | -0.114                     | 206.6727  |
| 28   | 18     | 11     | 27    | 18      | 10      | A    | 0           | 173005.237   | -0.114                     | 206.6727  |
| 28   | 18     | 11     | 27    | 18      | 10      | E    | 0           | 173006.093   | 0.003                      | 206.6611  |
| 34   | 16     | 18     | 34    | 15      | 19      | E    | 0           | 173137.261   | -0.061                     | 232.9474  |
| 34   | 16     | 19     | 34    | 15      | 20      | E    | 0           | 173144.085   | 0.001                      | 232.9341  |
| 34   | 16     | 19     | 34    | 15      | 20      | A    | 0           | 173183.400   | -0.013                     | 232.9421  |
| 57   | 13     | 45     | 57    | 12      | 46      | A    | 0           | 173320.214   | -0.083                     | 440.8887  |
| 57   | 13     | 45     | 57    | 12      | 46      | E    | 0           | 173321.853   | 0.094                      | 440.8908  |
| 28   | 16     | 12     | 27    | 16      | 11      | A    | 0           | 173395.302   | -0.043                     | 193.7798  |
| 28   | 16     | 13     | 27    | 16      | 12      | A    | 0           | 173395.302   | -0.043                     | 193.7798  |
| 28   | 16     | 13     | 27    | 16      | 12      | E    | 0           | 173396.351   | -0.117                     | 193.7702  |
| 67   | 19     | 49     | 67    | 18      | 50      | E    | 0           | 173429.643   | 0.049                      | 606.8242  |
| 68   | 19     | 50     | 68    | 18      | 51      | E    | 0           | 173454.062   | -0.035                     | 621.4161  |
| 33   | 16     | 17     | 33    | 15      | 18      | E    | 0           | 173616.159   | -0.065                     | 225.8728  |
| 33   | 16     | 18     | 33    | 15      | 19      | E    | 0           | 173623.421   | 0.010                      | 225.8594  |
| 29   | 6      | 23     | 28    | 7       | 22      | A    | 0           | 173649.685   | 0.009                      | 161.3910  |
| 28   | 15     | 14     | 27    | 15      | 13      | A    | 0           | 173652.919   | -0.020                     | 187.9188  |
| 28   | 15     | 13     | 27    | 15      | 12      | A    | 0           | 173652.919   | -0.020                     | 187.9188  |
| 28   | 15     | 13     | 27    | 15      | 12      | E    | 0           | 173653.738   | 0.040                      | 187.9239  |
| 28   | 15     | 14     | 27    | 15      | 13      | E    | 0           | 173654.350   | 0.031                      | 187.9104  |
| 33   | 16     | 17     | 33    | 15      | 18      | A    | 0           | 173662.229   | 0.009                      | 225.8675  |
| 29   | 6      | 23     | 28    | 7       | 22      | E    | 0           | 173666.030   | 0.031                      | 161.3994  |
| 28   | 6      | 23     | 27    | 5       | 22      | A    | 1           | 173667.581   | 0.096                      | 281.2543  |
| 41   | 4      | 37     | 41    | 3       | 38      | E    | 0           | 173670.678   | 0.035                      | 236.9532  |
| 41   | 5      | 37     | 41    | 4       | 38      | E    | 0           | 173670.680   | 0.002                      | 236.9532  |
| 41   | 4      | 37     | 41    | 3       | 38      | A    | 0           | 173693.725   | 0.091                      | 236.9450  |



| $J'$ | $K'_a$ | $K'_c$ | $J''$ | $K''_a$ | $K''_c$ | Sym. | $v_{tCH_3}$ | $\nu_{Obs.}$ | $\nu_{Obs.} - \nu_{Calc.}$ | $E_{low}$ |
|------|--------|--------|-------|---------|---------|------|-------------|--------------|----------------------------|-----------|
| 41   | 5      | 37     | 41    | 4       | 38      | A    | 0           | 173693.725   | 0.057                      | 236.9450  |
| 41   | 4      | 37     | 41    | 3       | 38      | E    | 1           | 173737.292   | 0.100                      | 365.2695  |
| 41   | 5      | 37     | 41    | 4       | 38      | E    | 1           | 173737.292   | 0.063                      | 365.2695  |
| 48   | 17     | 31     | 48    | 16      | 32      | A    | 0           | 173868.246   | -0.027                     | 360.4326  |
| 48   | 17     | 31     | 48    | 16      | 32      | E    | 0           | 173876.548   | -0.100                     | 360.4353  |
| 48   | 17     | 32     | 48    | 16      | 33      | E    | 0           | 173917.453   | 0.003                      | 360.4220  |
| 28   | 6      | 23     | 27    | 5       | 22      | E    | 0           | 173953.997   | -0.020                     | 152.6334  |
| 28   | 6      | 23     | 27    | 5       | 22      | A    | 0           | 173965.970   | 0.001                      | 152.6243  |
| 28   | 14     | 14     | 27    | 14      | 13      | A    | 0           | 173970.549   | -0.044                     | 182.4518  |
| 28   | 14     | 15     | 27    | 14      | 14      | A    | 0           | 173970.549   | -0.041                     | 182.4518  |
| 28   | 14     | 14     | 27    | 14      | 13      | E    | 0           | 173971.455   | 0.080                      | 182.4583  |
| 28   | 14     | 15     | 27    | 14      | 14      | E    | 0           | 173972.369   | 0.077                      | 182.4447  |
| 28   | 6      | 23     | 27    | 5       | 22      | E    | 1           | 174015.890   | 0.069                      | 280.9604  |
| 48   | 17     | 32     | 48    | 16      | 33      | A    | 0           | 174021.528   | -0.023                     | 360.4269  |
| 32   | 16     | 16     | 32    | 15      | 17      | E    | 0           | 174050.340   | -0.039                     | 219.0135  |
| 32   | 16     | 17     | 32    | 15      | 18      | E    | 0           | 174057.970   | 0.023                      | 219.0001  |
| 32   | 16     | 16     | 32    | 15      | 17      | A    | 0           | 174096.326   | -0.005                     | 219.0082  |
| 57   | 18     | 40     | 57    | 17      | 41      | E    | 0           | 174112.730   | 0.032                      | 467.3353  |
| 38   | 2      | 36     | 38    | 1       | 37      | A    | 1           | 174152.122   | -0.210                     | 331.9223  |
| 38   | 3      | 36     | 38    | 2       | 37      | A    | 1           | 174152.122   | -0.210                     | 331.9223  |
| 57   | 18     | 40     | 57    | 17      | 41      | A    | 0           | 174204.503   | -0.036                     | 467.3363  |
| 28   | 13     | 16     | 27    | 13      | 15      | E    | 0           | 174372.496   | -0.004                     | 177.3774  |
| 43   | 5      | 38     | 43    | 4       | 39      | A    | 1           | 174415.963   | -0.784                     | 387.3281  |
| 55   | 11     | 44     | 55    | 10      | 45      | A    | 0           | 174432.136   | -0.108                     | 411.7956  |
| 55   | 11     | 44     | 55    | 10      | 45      | E    | 0           | 174433.426   | -0.055                     | 411.7982  |
| 31   | 16     | 15     | 31    | 15      | 16      | E    | 0           | 174443.229   | -0.052                     | 212.3689  |
| 31   | 16     | 16     | 31    | 15      | 17      | E    | 0           | 174451.233   | 0.038                      | 212.3555  |
| 31   | 16     | 15     | 31    | 15      | 16      | A    | 0           | 174489.173   | -0.017                     | 212.3637  |
| 60   | 13     | 47     | 60    | 12      | 48      | A    | 0           | 174613.473   | -0.142                     | 483.3647  |
| 60   | 13     | 47     | 60    | 12      | 48      | E    | 0           | 174627.097   | -0.036                     | 483.3662  |
| 30   | 16     | 14     | 30    | 15      | 15      | E    | 0           | 174798.103   | -0.039                     | 205.9383  |
| 30   | 16     | 15     | 30    | 15      | 16      | E    | 0           | 174806.402   | 0.038                      | 205.9248  |
| 30   | 16     | 14     | 30    | 15      | 15      | A    | 0           | 174843.997   | -0.012                     | 205.9331  |
| 30   | 16     | 15     | 30    | 15      | 16      | A    | 0           | 174843.997   | -0.013                     | 205.9331  |
| 28   | 12     | 17     | 27    | 12      | 16      | A    | 0           | 174886.434   | 0.045                      | 172.7189  |
| 28   | 12     | 16     | 27    | 12      | 15      | A    | 0           | 174887.626   | 0.073                      | 172.7189  |
| 28   | 12     | 16     | 27    | 12      | 15      | E    | 0           | 174887.626   | -0.117                     | 172.7281  |
| 28   | 12     | 17     | 27    | 12      | 16      | E    | 0           | 174889.641   | -0.007                     | 172.7149  |
| 62   | 15     | 48     | 62    | 14      | 49      | A    | 0           | 174917.874   | -0.165                     | 514.9785  |
| 62   | 15     | 48     | 62    | 14      | 49      | E    | 0           | 174921.913   | -0.067                     | 514.9796  |
| 38   | 2      | 36     | 38    | 1       | 37      | E    | 0           | 174948.713   | 0.042                      | 203.2781  |
| 38   | 3      | 36     | 38    | 2       | 37      | E    | 0           | 174948.713   | 0.042                      | 203.2781  |
| 38   | 2      | 36     | 38    | 1       | 37      | A    | 0           | 174977.493   | 0.076                      | 203.2678  |
| 38   | 3      | 36     | 38    | 2       | 37      | A    | 0           | 174977.493   | 0.076                      | 203.2678  |
| 55   | 12     | 44     | 55    | 11      | 45      | E    | 0           | 174987.204   | -0.008                     | 411.8005  |
| 55   | 12     | 44     | 55    | 11      | 45      | A    | 0           | 174988.427   | -0.107                     | 411.7979  |
| 17   | 5      | 12     | 16    | 4       | 13      | E    | 0           | 174997.557   | 0.047                      | 98.4232   |
| 17   | 5      | 12     | 16    | 4       | 13      | A    | 0           | 174999.417   | 0.036                      | 98.4126   |
| 43   | 5      | 38     | 43    | 4       | 39      | E    | 0           | 175046.271   | 0.107                      | 258.7890  |
| 43   | 6      | 38     | 43    | 5       | 39      | E    | 0           | 175046.271   | -0.087                     | 258.7890  |
| 43   | 5      | 38     | 43    | 4       | 39      | A    | 0           | 175066.572   | 0.123                      | 258.7728  |
| 43   | 6      | 38     | 43    | 5       | 39      | A    | 0           | 175066.572   | -0.072                     | 258.7728  |
| 43   | 5      | 38     | 43    | 4       | 39      | E    | 1           | 175073.776   | 0.017                      | 387.0958  |
| 43   | 6      | 38     | 43    | 5       | 39      | E    | 1           | 175073.776   | -0.191                     | 387.0958  |
| 62   | 19     | 43     | 62    | 18      | 44      | E    | 0           | 175085.263   | -0.049                     | 537.3233  |
| 38   | 2      | 36     | 38    | 1       | 37      | E    | 1           | 175090.766   | -0.034                     | 331.5903  |
| 38   | 3      | 36     | 38    | 2       | 37      | E    | 1           | 175090.766   | -0.035                     | 331.5903  |
| 29   | 16     | 13     | 29    | 15      | 14      | E    | 0           | 175117.809   | -0.112                     | 199.7210  |
| 29   | 16     | 14     | 29    | 15      | 15      | E    | 0           | 175126.447   | 0.026                      | 199.7075  |
| 29   | 16     | 13     | 29    | 15      | 14      | A    | 0           | 175163.756   | 0.008                      | 199.7158  |
| 29   | 16     | 14     | 29    | 15      | 15      | A    | 0           | 175163.756   | 0.008                      | 199.7158  |
| 27   | 6      | 21     | 26    | 6       | 20      | A    | 1           | 175165.891   | 0.083                      | 277.8098  |
| 65   | 19     | 47     | 65    | 18      | 48      | A    | 0           | 175185.261   | -0.030                     | 578.2735  |
| 47   | 17     | 30     | 47    | 16      | 31      | E    | 0           | 175256.479   | 0.009                      | 350.2943  |
| 47   | 17     | 30     | 47    | 16      | 31      | A    | 0           | 175269.822   | -0.016                     | 350.2909  |
| 47   | 17     | 31     | 47    | 16      | 32      | E    | 0           | 175271.745   | -0.000                     | 350.2818  |
| 27   | 8      | 19     | 26    | 8       | 18      | A    | 0           | 175326.288   | -0.028                     | 152.8177  |
| 27   | 8      | 19     | 26    | 8       | 18      | E    | 0           | 175332.283   | 0.013                      | 152.8260  |
| 47   | 17     | 31     | 47    | 16      | 32      | A    | 0           | 175352.350   | 0.009                      | 350.2878  |
| 29   | 5      | 24     | 28    | 6       | 23      | A    | 1           | 175381.314   | 0.003                      | 287.0472  |
| 27   | 6      | 21     | 26    | 6       | 20      | E    | 1           | 175384.356   | -0.002                     | 277.4972  |
| 27   | 6      | 21     | 26    | 6       | 20      | E    | 0           | 175393.960   | -0.087                     | 149.1783  |
| 27   | 6      | 21     | 26    | 6       | 20      | A    | 0           | 175401.727   | 0.009                      | 149.1685  |
| 28   | 16     | 12     | 28    | 15      | 13      | E    | 0           | 175405.266   | -0.089                     | 193.7164  |
| 28   | 16     | 13     | 28    | 15      | 14      | E    | 0           | 175414.109   | 0.007                      | 193.7029  |
| 29   | 5      | 24     | 28    | 6       | 23      | E    | 1           | 175440.834   | -0.075                     | 286.7649  |
| 28   | 16     | 12     | 28    | 15      | 13      | A    | 0           | 175451.067   | -0.076                     | 193.7113  |
| 28   | 16     | 13     | 28    | 15      | 14      | A    | 0           | 175451.067   | -0.076                     | 193.7113  |
| 28   | 7      | 22     | 27    | 7       | 21      | E    | 0           | 175454.326   | -0.037                     | 155.5469  |
| 28   | 7      | 22     | 27    | 7       | 21      | A    | 0           | 175456.822   | -0.049                     | 155.5384  |
| 29   | 5      | 24     | 28    | 6       | 23      | E    | 0           | 175484.634   | -0.036                     | 158.4359  |
| 29   | 5      | 24     | 28    | 6       | 23      | A    | 0           | 175485.745   | 0.038                      | 158.4271  |
| 28   | 11     | 18     | 27    | 11      | 17      | A    | 0           | 175570.941   | 0.036                      | 168.4692  |
| 28   | 11     | 17     | 27    | 11      | 16      | E    | 0           | 175580.484   | -0.008                     | 168.4798  |
| 28   | 11     | 18     | 27    | 11      | 17      | E    | 0           | 175582.310   | 0.022                      | 168.4671  |
| 28   | 11     | 17     | 27    | 11      | 16      | A    | 0           | 175587.664   | -0.019                     | 168.4697  |
| 27   | 16     | 11     | 27    | 15      | 12      | E    | 0           | 175662.859   | -0.127                     | 187.9239  |
| 27   | 16     | 12     | 27    | 15      | 13      | E    | 0           | 175671.980   | 0.027                      | 187.9104  |
| 27   | 16     | 11     | 27    | 15      | 12      | A    | 0           | 175708.732   | -0.005                     | 187.9188  |
| 27   | 16     | 12     | 27    | 15      | 13      | A    | 0           | 175708.732   | -0.005                     | 187.9188  |
| 26   | 16     | 10     | 26    | 15      | 11      | E    | 0           | 175893.138   | -0.041                     | 182.3430  |
| 26   | 16     | 11     | 26    | 15      | 12      | E    | 0           | 175902.412   | 0.069                      | 182.3295  |
| 26   | 16     | 10     | 26    | 15      | 11      | A    | 0           | 175938.899   | 0.001                      | 182.3379  |
| 26   | 16     | 11     | 26    | 15      | 12      | A    | 0           | 175938.899   | 0.001                      | 182.3379  |
| 53   | 10     | 43     | 53    | 9       | 44      | E    | 0           | 175984.458   | 0.050                      | 383.7170  |
| 53   | 10     | 43     | 53    | 9       | 44      | A    | 0           | 175988.060   | -0.032                     | 383.7138  |
| 45   | 6      | 39     | 45    | 5       | 40      | E    | 1           | 176069.983   | -0.088                     | 409.9860  |
| 45   | 7      | 39     | 45    | 6       | 40      | E    | 1           | 176071.089   | -0.009                     | 409.9860  |
| 25   | 16     | 9      | 25    | 15      | 10      | E    | 0           | 176098.090   | -0.057                     | 176.9732  |
| 45   | 6      | 39     | 45    | 5       | 40      | A    | 0           | 176101.019   | -0.056                     | 281.6658  |
| 45   | 7      | 39     | 45    | 6       | 40      | A    | 0           | 176102.096   | 0.061                      | 281.6658  |
| 25   | 16     | 10     | 25    | 15      | 11      | E    | 0           | 176107.511   | 0.027                      | 176.9596  |
| 56   | 18     | 39     | 56    | 17      | 40      | A    | 0           | 176122.247   | -0.030                     | 455.1782  |
| 25   | 16     | 9      | 25    | 15      | 10      | A    | 0           | 176143.840   | 0.007                      | 176.9681  |
| 25   | 16     | 10     | 25    | 15      | 11      | A    | 0           | 176143.840   | 0.007                      | 176.9681  |
| 53   | 11     | 43     | 53    | 10      | 44      | E    | 0           | 176170.099   | -0.041                     | 383.7176  |
| 53   | 11     | 43     | 53    | 10      | 44      | A    | 0           | 176174.713   | -0.028                     | 383.7145  |
| 40   | 3      | 37     | 40    | 2       | 38      | A    | 1           | 176201.271   | 0.077                      | 352.0673  |
| 40   | 4      | 37     | 40    | 3       | 38      | A    | 1           | 176201.271   | 0.075                      | 352.0673  |
| 11   | 10     | 2      | 10    | 9       | 2       | E    | 0           | 176229.970   | 0.030                      | 93.9842   |
| 30   | 4      | 26     | 29    | 5       | 25      | A    | 1           | 176232.604   | 0.014                      | 289.4962  |
| 11   | 10     | 1      | 10    | 9       | 1       | E    | 0           | 176251.692   | -0.050                     | 93.9961   |
| 11   | 10     | 1      | 10    | 9       | 2       | A    | 0           | 176277.444   | 0.012                      | 93.9841   |
| 11   | 10     | 2      | 10    | 9       | 1       | A    | 0           | 176277.444   | 0.012                      | 93.9841   |
| 24   | 16     | 8      | 24    | 15      | 9       | E    | 0           | 176279.912   | -0.042                     | 171.8138  |
| 24   | 16     | 9      | 24    | 15      | 10      | E    | 0           | 176289.522   | 0.078                      | 171.8003  |



| $J'$ | $K'_a$ | $K'_c$ | $J''$ | $K''_a$ | $K''_c$ | Sym. | $v_{tCH_3}$ | $\nu_{Obs.}$ | $\nu_{Obs.} - \nu_{Calc.}$ | $E_{low}$ |
|------|--------|--------|-------|---------|---------|------|-------------|--------------|----------------------------|-----------|
| 29   | 6      | 24     | 28    | 6       | 23      | A    | 1           | 176301.778   | 0.051                      | 287.0472  |
| 31   | 3      | 28     | 30    | 3       | 27      | A    | 1           | 176307.461   | -0.096                     | 291.4485  |
| 31   | 4      | 28     | 30    | 3       | 27      | A    | 1           | 176308.572   | -0.154                     | 291.4485  |
| 30   | 4      | 26     | 29    | 4       | 25      | A    | 1           | 176310.291   | -0.013                     | 289.4936  |
| 24   | 16     | 8      | 24    | 15      | 9       | A    | 0           | 176325.586   | -0.025                     | 171.8088  |
| 24   | 16     | 9      | 24    | 15      | 10      | A    | 0           | 176325.586   | -0.025                     | 171.8088  |
| 30   | 4      | 26     | 29    | 5       | 25      | E    | 0           | 176372.732   | -0.011                     | 160.8789  |
| 30   | 4      | 26     | 29    | 5       | 25      | A    | 0           | 176376.408   | 0.003                      | 160.8700  |
| 30   | 5      | 26     | 29    | 5       | 25      | E    | 1           | 176400.564   | -0.016                     | 289.2087  |
| 31   | 3      | 28     | 30    | 4       | 27      | E    | 1           | 176401.928   | -0.015                     | 291.1496  |
| 31   | 4      | 28     | 30    | 4       | 27      | E    | 1           | 176403.278   | -0.002                     | 291.1496  |
| 31   | 3      | 28     | 30    | 3       | 27      | E    | 1           | 176404.566   | 0.027                      | 291.1495  |
| 31   | 4      | 28     | 30    | 3       | 27      | E    | 1           | 176405.840   | -0.036                     | 291.1495  |
| 30   | 5      | 26     | 29    | 5       | 25      | E    | 0           | 176418.216   | 0.021                      | 160.8789  |
| 30   | 5      | 26     | 29    | 5       | 25      | A    | 0           | 176422.088   | 0.045                      | 160.8700  |
| 31   | 3      | 28     | 30    | 4       | 27      | E    | 0           | 176426.628   | -0.005                     | 162.8212  |
| 31   | 4      | 28     | 30    | 4       | 27      | E    | 0           | 176427.869   | -0.035                     | 162.8212  |
| 31   | 3      | 28     | 30    | 4       | 27      | A    | 0           | 176429.533   | -0.066                     | 162.8119  |
| 31   | 4      | 28     | 30    | 3       | 27      | E    | 0           | 176430.527   | 0.149                      | 162.8211  |
| 31   | 3      | 28     | 30    | 3       | 27      | A    | 0           | 176432.114   | 0.028                      | 162.8118  |
| 31   | 4      | 28     | 30    | 3       | 27      | A    | 0           | 176433.347   | -0.016                     | 162.8118  |
| 30   | 4      | 26     | 29    | 4       | 25      | E    | 1           | 176439.546   | -0.133                     | 289.2058  |
| 23   | 16     | 7      | 23    | 15      | 8       | E    | 0           | 176440.542   | 0.002                      | 166.8645  |
| 32   | 2      | 30     | 31    | 2       | 29      | A    | 1           | 176446.436   | -0.027                     | 292.9415  |
| 32   | 2      | 30     | 31    | 3       | 29      | A    | 1           | 176446.436   | 0.013                      | 292.9415  |
| 32   | 3      | 30     | 31    | 2       | 29      | A    | 1           | 176446.436   | -0.046                     | 292.9415  |
| 32   | 3      | 30     | 31    | 3       | 29      | A    | 1           | 176446.436   | -0.006                     | 292.9415  |
| 23   | 16     | 8      | 23    | 15      | 9       | E    | 0           | 176450.241   | 0.076                      | 166.8509  |
| 30   | 4      | 26     | 29    | 4       | 25      | E    | 0           | 176455.901   | -0.007                     | 160.8762  |
| 29   | 6      | 24     | 28    | 6       | 23      | A    | 0           | 176464.701   | 0.034                      | 158.4271  |
| 28   | 10     | 19     | 27    | 10      | 18      | A    | 0           | 176470.845   | -0.059                     | 164.6488  |
| 23   | 16     | 7      | 23    | 15      | 8       | A    | 0           | 176486.112   | -0.057                     | 166.8595  |
| 23   | 16     | 8      | 23    | 15      | 9       | A    | 0           | 176486.112   | -0.057                     | 166.8595  |
| 30   | 5      | 26     | 29    | 4       | 25      | E    | 0           | 176501.358   | -0.001                     | 160.8762  |
| 30   | 5      | 26     | 29    | 4       | 25      | A    | 0           | 176505.477   | -0.055                     | 160.8672  |
| 46   | 17     | 29     | 46    | 16      | 30      | E    | 0           | 176506.585   | 0.027                      | 340.3812  |
| 28   | 10     | 19     | 27    | 10      | 18      | E    | 0           | 176510.815   | -0.046                     | 164.6506  |
| 32   | 2      | 30     | 31    | 2       | 29      | E    | 1           | 176515.688   | -0.059                     | 292.6249  |
| 32   | 2      | 30     | 31    | 3       | 29      | E    | 1           | 176515.688   | -0.013                     | 292.6249  |
| 32   | 3      | 30     | 31    | 2       | 29      | E    | 1           | 176515.688   | -0.082                     | 292.6249  |
| 32   | 3      | 30     | 31    | 3       | 29      | E    | 1           | 176515.688   | -0.036                     | 292.6249  |
| 46   | 17     | 29     | 46    | 16      | 30      | A    | 0           | 176535.221   | 0.019                      | 340.3773  |
| 32   | 2      | 30     | 31    | 2       | 29      | E    | 0           | 176546.482   | -0.021                     | 164.2997  |
| 32   | 2      | 30     | 31    | 3       | 29      | E    | 0           | 176546.482   | 0.023                      | 164.2997  |
| 32   | 3      | 30     | 31    | 2       | 29      | E    | 0           | 176546.482   | -0.043                     | 164.2997  |
| 32   | 3      | 30     | 31    | 3       | 29      | E    | 0           | 176546.482   | 0.001                      | 164.2997  |
| 32   | 2      | 30     | 31    | 2       | 29      | A    | 0           | 176548.601   | -0.028                     | 164.2898  |
| 32   | 2      | 30     | 31    | 3       | 29      | A    | 0           | 176548.601   | 0.016                      | 164.2898  |
| 32   | 3      | 30     | 31    | 2       | 29      | A    | 0           | 176548.601   | -0.050                     | 164.2898  |
| 32   | 3      | 30     | 31    | 3       | 29      | A    | 0           | 176548.601   | -0.006                     | 164.2898  |
| 46   | 17     | 30     | 46    | 16      | 31      | A    | 0           | 176578.606   | -0.047                     | 340.3757  |
| 22   | 16     | 6      | 22    | 15      | 7       | E    | 0           | 176581.672   | -0.053                     | 162.1248  |
| 22   | 16     | 7      | 22    | 15      | 8       | E    | 0           | 176591.476   | 0.010                      | 162.1112  |
| 28   | 10     | 18     | 27    | 10      | 17      | E    | 0           | 176618.864   | 0.047                      | 164.6639  |
| 22   | 16     | 6      | 22    | 15      | 7       | A    | 0           | 176627.247   | -0.079                     | 162.1198  |
| 22   | 16     | 7      | 22    | 15      | 8       | A    | 0           | 176627.247   | -0.079                     | 162.1198  |
| 33   | 1      | 32     | 32    | 1       | 31      | A    | 1           | 176638.959   | 0.015                      | 294.0045  |
| 33   | 1      | 32     | 32    | 2       | 31      | A    | 1           | 176638.959   | 0.015                      | 294.0045  |
| 33   | 2      | 32     | 32    | 1       | 31      | A    | 1           | 176638.959   | 0.015                      | 294.0045  |
| 33   | 2      | 32     | 32    | 2       | 31      | A    | 1           | 176638.959   | 0.015                      | 294.0045  |
| 28   | 10     | 18     | 27    | 10      | 17      | A    | 0           | 176653.415   | -0.002                     | 164.6549  |
| 33   | 1      | 32     | 32    | 1       | 31      | E    | 1           | 176680.382   | -0.031                     | 293.6643  |
| 33   | 1      | 32     | 32    | 2       | 31      | E    | 1           | 176680.382   | -0.031                     | 293.6643  |
| 33   | 2      | 32     | 32    | 1       | 31      | E    | 1           | 176680.382   | -0.032                     | 293.6643  |
| 33   | 2      | 32     | 32    | 2       | 31      | E    | 1           | 176680.382   | -0.031                     | 293.6643  |
| 51   | 10     | 42     | 51    | 9       | 43      | E    | 1           | 176688.390   | 0.186                      | 484.9521  |
| 47   | 7      | 40     | 47    | 6       | 41      | E    | 1           | 176693.636   | -0.019                     | 433.9314  |
| 47   | 8      | 40     | 47    | 7       | 41      | E    | 1           | 176698.100   | -0.016                     | 433.9314  |
| 21   | 16     | 5      | 21    | 15      | 6       | E    | 0           | 176705.152   | -0.063                     | 157.5942  |
| 21   | 16     | 6      | 21    | 15      | 7       | E    | 0           | 176715.099   | 0.039                      | 157.5806  |
| 33   | 1      | 32     | 32    | 1       | 31      | E    | 0           | 176717.151   | 0.012                      | 165.3440  |
| 33   | 2      | 32     | 32    | 2       | 31      | E    | 0           | 176717.151   | 0.012                      | 165.3440  |
| 33   | 1      | 32     | 32    | 1       | 31      | A    | 0           | 176718.376   | -0.036                     | 165.3335  |
| 33   | 1      | 32     | 32    | 2       | 31      | A    | 0           | 176718.376   | -0.036                     | 165.3335  |
| 33   | 2      | 32     | 32    | 2       | 31      | A    | 0           | 176718.376   | -0.036                     | 165.3335  |
| 47   | 7      | 40     | 47    | 6       | 41      | A    | 0           | 176765.326   | -0.014                     | 305.6154  |
| 47   | 8      | 40     | 47    | 7       | 41      | A    | 0           | 176769.505   | -0.006                     | 305.6154  |
| 63   | 14     | 49     | 63    | 13      | 50      | E    | 0           | 176780.181   | -0.008                     | 528.0523  |
| 51   | 9      | 42     | 51    | 8       | 43      | E    | 0           | 176782.662   | -0.023                     | 356.6530  |
| 51   | 9      | 42     | 51    | 8       | 43      | A    | 0           | 176790.338   | -0.024                     | 356.6492  |
| 20   | 16     | 4      | 20    | 15      | 5       | E    | 0           | 176812.518   | -0.105                     | 153.2724  |
| 51   | 10     | 42     | 51    | 9       | 43      | A    | 0           | 176847.914   | -0.043                     | 356.6493  |
| 34   | 0      | 34     | 33    | 0       | 33      | A    | 1           | 176853.698   | 0.047                      | 294.6562  |
| 34   | 0      | 34     | 33    | 1       | 33      | A    | 1           | 176853.698   | 0.047                      | 294.6562  |
| 34   | 1      | 34     | 33    | 0       | 33      | A    | 1           | 176853.698   | 0.047                      | 294.6562  |
| 34   | 1      | 34     | 33    | 1       | 33      | A    | 1           | 176853.698   | 0.047                      | 294.6562  |
| 20   | 16     | 4      | 20    | 15      | 5       | A    | 0           | 176858.175   | -0.001                     | 153.2674  |
| 20   | 16     | 5      | 20    | 15      | 6       | A    | 0           | 176858.175   | -0.001                     | 153.2674  |
| 34   | 0      | 34     | 33    | 0       | 33      | E    | 1           | 176865.536   | -0.026                     | 294.2864  |
| 34   | 0      | 34     | 33    | 1       | 33      | E    | 1           | 176865.536   | -0.026                     | 294.2864  |
| 34   | 1      | 34     | 33    | 0       | 33      | E    | 1           | 176865.536   | -0.026                     | 294.2864  |
| 34   | 1      | 34     | 33    | 1       | 33      | E    | 1           | 176865.536   | -0.026                     | 294.2864  |
| 17   | 7      | 11     | 16    | 6       | 10      | A    | 0           | 176885.328   | -0.005                     | 102.3284  |
| 49   | 8      | 41     | 49    | 7       | 42      | E    | 1           | 176900.678   | 0.082                      | 458.9232  |
| 19   | 16     | 3      | 19    | 15      | 4       | E    | 0           | 176905.446   | -0.012                     | 149.1589  |
| 34   | 0      | 34     | 33    | 0       | 33      | A    | 0           | 176908.856   | -0.177                     | 165.9613  |
| 34   | 0      | 34     | 33    | 1       | 33      | A    | 0           | 176908.856   | -0.177                     | 165.9613  |
| 34   | 1      | 34     | 33    | 0       | 33      | A    | 0           | 176908.856   | -0.177                     | 165.9613  |
| 34   | 1      | 34     | 33    | 1       | 33      | A    | 0           | 176908.856   | -0.177                     | 165.9613  |
| 34   | 0      | 34     | 33    | 0       | 33      | E    | 0           | 176908.856   | 0.194                      | 165.9728  |
| 34   | 1      | 34     | 33    | 1       | 33      | E    | 0           | 176908.856   | 0.194                      | 165.9728  |
| 19   | 16     | 4      | 19    | 15      | 5       | E    | 0           | 176915.504   | 0.037                      | 149.1453  |
| 49   | 9      | 41     | 49    | 8       | 42      | E    | 1           | 176918.056   | 0.083                      | 458.9232  |
| 29   | 5      | 24     | 28    | 5       | 23      | A    | 1           | 176929.331   | 0.029                      | 286.9955  |
| 40   | 3      | 37     | 40    | 2       | 38      | A    | 0           | 176977.094   | 0.124                      | 223.4477  |
| 40   | 4      | 37     | 40    | 3       | 38      | A    | 0           | 176977.094   | 0.121                      | 223.4477  |
| 18   | 16     | 2      | 18    | 15      | 3       | E    | 0           | 176985.076   | -0.068                     | 145.2533  |
| 49   | 8      | 41     | 49    | 7       | 42      | E    | 0           | 177004.781   | -0.031                     | 330.6176  |
| 49   | 8      | 41     | 49    | 7       | 42      | A    | 0           | 177015.982   | -0.013                     | 330.6130  |
| 49   | 9      | 41     | 49    | 8       | 42      | E    | 0           | 177020.961   | -0.029                     | 330.6177  |
| 40   | 3      | 37     | 40    | 2       | 38      | E    | 1           | 177057.293   | -0.076                     | 351.7711  |
| 40   | 4      | 37     | 40    | 3       | 38      | E    | 1           | 177057.293   | -0.078                     | 351.7711  |
| 13   | 9      | 5      | 12    | 8       | 5       | E    | 0           | 177059.439   | 0.006                      | 95.4843   |
| 60   | 14     | 47     | 60    | 13      | 48      | A    | 0           | 177097.809   | -0.142                     | 483.3780  |
| 60   | 14     | 47     | 60    | 13      | 48      | E    | 0           | 177101.287   | -0.056                     | 483.3795  |
| 13   | 9      | 4      | 12    | 8       | 5       | A    | 0           | 177106.971   | -0.002                     | 95.4826   |



| $J'$ | $K'_a$ | $K'_c$ | $J''$ | $K''_a$ | $K''_c$ | Sym. | $v_{tCH_3}$ | $\nu_{Obs.}$ | $\nu_{Obs.} - \nu_{Calc.}$ | $E_{low}$ |
|------|--------|--------|-------|---------|---------|------|-------------|--------------|----------------------------|-----------|
| 29   | 5      | 24     | 28    | 5       | 23      | E    | 0           | 177119.657   | -0.028                     | 158.3814  |
| 29   | 5      | 24     | 28    | 5       | 23      | E    | 1           | 177124.903   | -0.234                     | 286.7088  |
| 29   | 5      | 24     | 28    | 5       | 23      | A    | 0           | 177125.938   | 0.053                      | 158.3724  |
| 33   | 8      | 25     | 32    | 9       | 24      | A    | 0           | 177393.555   | -0.024                     | 193.0397  |
| 28   | 9      | 20     | 27    | 9       | 19      | A    | 0           | 177414.814   | -0.006                     | 161.2700  |
| 28   | 9      | 20     | 27    | 9       | 19      | E    | 0           | 177423.427   | -0.092                     | 161.2762  |
| 33   | 8      | 25     | 32    | 9       | 24      | E    | 0           | 177453.313   | 0.099                      | 193.0466  |
| 28   | 8      | 21     | 27    | 8       | 20      | A    | 0           | 177503.455   | -0.034                     | 158.2935  |
| 28   | 8      | 21     | 27    | 8       | 20      | E    | 0           | 177504.417   | 0.003                      | 158.3012  |
| 45   | 17     | 28     | 45    | 16      | 29      | E    | 0           | 177645.980   | -0.075                     | 330.6942  |
| 45   | 17     | 29     | 45    | 16      | 30      | E    | 0           | 177653.170   | -0.005                     | 330.6817  |
| 45   | 17     | 28     | 45    | 16      | 29      | A    | 0           | 177683.960   | 0.037                      | 330.6900  |
| 15   | 8      | 8      | 14    | 7       | 8       | E    | 0           | 177694.301   | -0.014                     | 98.2368   |
| 45   | 17     | 29     | 45    | 16      | 30      | A    | 0           | 177706.236   | -0.071                     | 330.6892  |
| 15   | 8      | 7      | 14    | 7       | 7       | E    | 0           | 177725.922   | 0.012                      | 98.2465   |
| 15   | 8      | 8      | 14    | 7       | 7       | A    | 0           | 177734.190   | -0.036                     | 98.2335   |
| 15   | 8      | 7      | 14    | 7       | 8       | A    | 0           | 177748.793   | 0.078                      | 98.2331   |
| 29   | 6      | 24     | 28    | 5       | 23      | A    | 1           | 177849.817   | 0.099                      | 286.9955  |
| 55   | 18     | 38     | 55    | 17      | 39      | A    | 0           | 177986.233   | -0.029                     | 443.2528  |
| 29   | 6      | 24     | 28    | 5       | 23      | E    | 0           | 178095.334   | -0.022                     | 158.3814  |
| 29   | 6      | 24     | 28    | 5       | 23      | A    | 0           | 178104.861   | 0.016                      | 158.3724  |
| 17   | 7      | 10     | 16    | 6       | 11      | A    | 0           | 178229.663   | 0.025                      | 102.2902  |
| 63   | 19     | 45     | 63    | 18      | 46      | E    | 0           | 178411.449   | -0.067                     | 550.6044  |
| 65   | 16     | 50     | 65    | 15      | 51      | A    | 0           | 178436.808   | -0.097                     | 561.1834  |
| 65   | 16     | 50     | 65    | 15      | 51      | E    | 0           | 178440.970   | -0.028                     | 561.1841  |
| 63   | 19     | 45     | 63    | 18      | 46      | A    | 0           | 178471.488   | -0.051                     | 550.6054  |
| 69   | 16     | 53     | 69    | 15      | 54      | E    | 0           | 178543.291   | 0.004                      | 624.0094  |
| 18   | 6      | 12     | 17    | 5       | 13      | E    | 0           | 178563.638   | 0.008                      | 103.8221  |
| 18   | 6      | 12     | 17    | 5       | 13      | A    | 0           | 178574.475   | 0.010                      | 103.8120  |
| 42   | 4      | 38     | 42    | 3       | 39      | E    | 0           | 178669.888   | 0.014                      | 244.7180  |
| 42   | 5      | 38     | 42    | 4       | 39      | E    | 0           | 178669.888   | -0.003                     | 244.7180  |
| 44   | 17     | 27     | 44    | 16      | 28      | E    | 0           | 178687.637   | -0.106                     | 321.2318  |
| 42   | 4      | 38     | 42    | 3       | 39      | A    | 0           | 178693.624   | 0.060                      | 244.7098  |
| 42   | 5      | 38     | 42    | 4       | 39      | A    | 0           | 178693.624   | 0.043                      | 244.7098  |
| 44   | 17     | 28     | 44    | 16      | 29      | E    | 0           | 178695.179   | -0.023                     | 321.2193  |
| 31   | 7      | 24     | 30    | 8       | 23      | A    | 0           | 178729.075   | -0.037                     | 176.6694  |
| 44   | 17     | 27     | 44    | 16      | 28      | A    | 0           | 178730.728   | 0.021                      | 321.2275  |
| 42   | 4      | 38     | 42    | 3       | 39      | E    | 1           | 178739.117   | -0.067                     | 373.0328  |
| 42   | 5      | 38     | 42    | 4       | 39      | E    | 1           | 178739.117   | -0.085                     | 373.0328  |
| 44   | 17     | 28     | 44    | 16      | 29      | A    | 0           | 178741.921   | -0.062                     | 321.2271  |
| 31   | 7      | 24     | 30    | 8       | 23      | E    | 0           | 178765.481   | -0.039                     | 176.6771  |
| 27   | 7      | 20     | 26    | 7       | 19      | A    | 0           | 178766.630   | 0.081                      | 150.8131  |
| 27   | 7      | 20     | 26    | 7       | 19      | E    | 0           | 178767.950   | 0.047                      | 150.8227  |
| 28   | 9      | 19     | 27    | 9       | 18      | E    | 0           | 178792.070   | 0.009                      | 161.3366  |
| 28   | 9      | 19     | 27    | 9       | 18      | A    | 0           | 178793.236   | -0.025                     | 161.3293  |
| 61   | 19     | 42     | 61    | 18      | 43      | E    | 0           | 179067.210   | -0.069                     | 523.9838  |
| 39   | 2      | 37     | 39    | 1       | 38      | A    | 1           | 179076.099   | -0.245                     | 338.8405  |
| 39   | 3      | 37     | 39    | 2       | 38      | A    | 1           | 179076.099   | -0.245                     | 338.8405  |
| 61   | 19     | 42     | 61    | 18      | 43      | A    | 0           | 179098.144   | -0.031                     | 523.9846  |
| 29   | 19     | 11     | 28    | 19      | 10      | A    | 0           | 179123.238   | -0.182                     | 219.4667  |
| 29   | 19     | 10     | 28    | 19      | 9       | A    | 0           | 179123.238   | -0.182                     | 219.4667  |
| 29   | 19     | 11     | 28    | 19      | 10      | E    | 0           | 179124.172   | 0.078                      | 219.4543  |
| 54   | 18     | 36     | 54    | 17      | 37      | A    | 0           | 179155.824   | -0.013                     | 431.5831  |
| 54   | 18     | 36     | 54    | 17      | 37      | E    | 0           | 179196.097   | -0.080                     | 431.5829  |
| 29   | 18     | 11     | 28    | 18      | 10      | A    | 0           | 179290.383   | -0.134                     | 212.4436  |
| 29   | 18     | 12     | 28    | 18      | 11      | A    | 0           | 179290.383   | -0.134                     | 212.4436  |
| 29   | 18     | 12     | 28    | 18      | 11      | E    | 0           | 179291.352   | -0.001                     | 212.4319  |
| 29   | 17     | 13     | 28    | 17      | 12      | A    | 0           | 179488.054   | -0.083                     | 205.8086  |
| 29   | 17     | 12     | 28    | 17      | 11      | A    | 0           | 179488.054   | -0.083                     | 205.8086  |
| 29   | 17     | 13     | 28    | 17      | 12      | E    | 0           | 179489.064   | -0.103                     | 205.7979  |
| 54   | 18     | 37     | 54    | 17      | 38      | E    | 0           | 179625.012   | 0.028                      | 431.5571  |
| 43   | 17     | 26     | 43    | 16      | 27      | E    | 0           | 179641.299   | -0.073                     | 311.9927  |
| 43   | 17     | 27     | 43    | 16      | 28      | E    | 0           | 179649.595   | 0.067                      | 311.9801  |
| 43   | 17     | 26     | 43    | 16      | 27      | A    | 0           | 179686.979   | -0.000                     | 311.9885  |
| 43   | 17     | 27     | 43    | 16      | 28      | A    | 0           | 179692.454   | -0.077                     | 311.9883  |
| 29   | 16     | 13     | 28    | 16      | 12      | A    | 0           | 179724.711   | -0.040                     | 199.5637  |
| 29   | 16     | 14     | 28    | 16      | 13      | A    | 0           | 179724.711   | -0.040                     | 199.5637  |
| 54   | 18     | 37     | 54    | 17      | 38      | A    | 0           | 179765.668   | -0.038                     | 431.5600  |
| 28   | 6      | 22     | 27    | 6       | 21      | A    | 1           | 179833.399   | 0.086                      | 283.6527  |
| 39   | 2      | 37     | 39    | 1       | 38      | E    | 0           | 179895.375   | 0.043                      | 210.1992  |
| 39   | 3      | 37     | 39    | 2       | 38      | E    | 0           | 179895.375   | 0.043                      | 210.1992  |
| 39   | 2      | 37     | 39    | 1       | 38      | A    | 0           | 179925.010   | 0.117                      | 210.1889  |
| 39   | 3      | 37     | 39    | 2       | 38      | A    | 0           | 179925.010   | 0.117                      | 210.1889  |
| 29   | 15     | 15     | 28    | 15      | 14      | A    | 0           | 180012.086   | -0.061                     | 193.7113  |
| 29   | 15     | 14     | 28    | 15      | 13      | A    | 0           | 180012.086   | -0.061                     | 193.7113  |
| 29   | 15     | 14     | 28    | 15      | 13      | E    | 0           | 180013.110   | 0.127                      | 193.7164  |
| 29   | 15     | 15     | 28    | 15      | 14      | E    | 0           | 180013.799   | 0.103                      | 193.7029  |
| 39   | 2      | 37     | 39    | 1       | 38      | E    | 1           | 180041.341   | -0.038                     | 338.5099  |
| 39   | 3      | 37     | 39    | 2       | 38      | E    | 1           | 180041.341   | -0.038                     | 338.5099  |
| 28   | 6      | 22     | 27    | 6       | 21      | E    | 0           | 180085.366   | 0.031                      | 155.0288  |
| 44   | 5      | 39     | 44    | 4       | 40      | E    | 0           | 180087.892   | 0.059                      | 267.0531  |
| 44   | 6      | 39     | 44    | 5       | 40      | E    | 0           | 180087.892   | -0.041                     | 267.0531  |
| 28   | 6      | 22     | 27    | 6       | 21      | A    | 0           | 180094.422   | -0.022                     | 155.0192  |
| 44   | 5      | 39     | 44    | 4       | 40      | A    | 0           | 180108.847   | 0.071                      | 267.0460  |
| 44   | 6      | 39     | 44    | 5       | 40      | A    | 0           | 180108.847   | -0.030                     | 267.0460  |
| 44   | 5      | 39     | 44    | 4       | 40      | E    | 1           | 180117.847   | -0.013                     | 395.3675  |
| 44   | 6      | 39     | 44    | 5       | 40      | E    | 1           | 180117.847   | -0.121                     | 395.3675  |
| 62   | 19     | 44     | 62    | 18      | 45      | E    | 0           | 180351.323   | -0.006                     | 537.1121  |
| 29   | 14     | 16     | 28    | 14      | 15      | A    | 0           | 180367.259   | -0.011                     | 188.2548  |
| 29   | 14     | 15     | 28    | 14      | 14      | E    | 0           | 180368.227   | 0.090                      | 188.2614  |
| 29   | 14     | 16     | 28    | 14      | 15      | E    | 0           | 180369.197   | 0.014                      | 188.2478  |
| 62   | 19     | 44     | 62    | 18      | 45      | A    | 0           | 180419.500   | -0.022                     | 537.1134  |
| 42   | 17     | 25     | 42    | 16      | 26      | E    | 0           | 180514.974   | -0.039                     | 302.9758  |
| 42   | 17     | 26     | 42    | 16      | 27      | E    | 0           | 180523.894   | -0.006                     | 302.9632  |
| 42   | 17     | 25     | 42    | 16      | 26      | A    | 0           | 180561.998   | 0.083                      | 302.9716  |
| 42   | 17     | 26     | 42    | 16      | 27      | A    | 0           | 180564.432   | -0.152                     | 302.9715  |
| 56   | 12     | 45     | 56    | 11      | 46      | E    | 0           | 180634.426   | -0.026                     | 423.1554  |
| 56   | 12     | 45     | 56    | 11      | 46      | A    | 0           | 180636.267   | -0.103                     | 423.1530  |
| 63   | 15     | 49     | 63    | 14      | 50      | A    | 0           | 180685.254   | -0.062                     | 528.0744  |
| 63   | 15     | 49     | 63    | 14      | 50      | E    | 0           | 180690.114   | -0.030                     | 528.0754  |
| 29   | 13     | 17     | 28    | 13      | 16      | A    | 0           | 180815.510   | 0.013                      | 183.1994  |
| 29   | 13     | 16     | 28    | 13      | 15      | E    | 0           | 180816.567   | 0.121                      | 183.2073  |
| 29   | 13     | 17     | 28    | 13      | 16      | E    | 0           | 180817.899   | -0.054                     | 183.1939  |
| 29   | 7      | 23     | 28    | 7       | 22      | A    | 1           | 180861.996   | 0.040                      | 290.0001  |
| 30   | 5      | 25     | 29    | 6       | 24      | A    | 1           | 180906.665   | -0.011                     | 292.9280  |
| 30   | 5      | 25     | 29    | 6       | 24      | E    | 1           | 181000.960   | -0.044                     | 292.6506  |
| 29   | 7      | 23     | 28    | 7       | 22      | E    | 0           | 181010.454   | -0.077                     | 161.3994  |
| 29   | 7      | 23     | 28    | 7       | 22      | A    | 0           | 181013.752   | -0.002                     | 161.3910  |
| 29   | 7      | 23     | 28    | 7       | 22      | E    | 1           | 181017.552   | -0.055                     | 289.7250  |
| 30   | 5      | 25     | 29    | 6       | 24      | E    | 0           | 181034.729   | 0.005                      | 164.3220  |
| 30   | 5      | 25     | 29    | 6       | 24      | A    | 0           | 181037.148   | -0.005                     | 164.3134  |
| 53   | 18     | 35     | 53    | 17      | 36      | A    | 0           | 181094.406   | -0.043                     | 420.1121  |
| 53   | 18     | 35     | 53    | 17      | 36      | E    | 0           | 181128.617   | -0.062                     | 420.1125  |
| 41   | 3      | 38     | 41    | 2       | 39      | A    | 1           | 181146.183   | 0.075                      | 359.4918  |
| 41   | 4      | 38     | 41    | 3       | 39      | A    | 1           | 181146.183   | 0.074                      | 359.4918  |
| 41   | 17     | 24     | 41    | 16      | 25      | E    | 0           | 181315.595   | -0.023                     | 294.1801  |



| $J'$ | $K'_a$ | $K'_c$ | $J''$ | $K''_a$ | $K''_c$ | Sym. | $v_{tCH_3}$ | $\nu_{Obs.}$ | $\nu_{Obs.} - \nu_{Calc.}$ | $E_{low}$ |
|------|--------|--------|-------|---------|---------|------|-------------|--------------|----------------------------|-----------|
| 41   | 17     | 25     | 41    | 16      | 26      | E    | 0           | 181325.176   | -0.016                     | 294.1673  |
| 61   | 13     | 48     | 61    | 12      | 49      | A    | 0           | 181349.502   | -0.108                     | 495.9387  |
| 31   | 4      | 27     | 30    | 5       | 26      | A    | 1           | 181357.317   | 0.007                      | 295.3761  |
| 54   | 10     | 44     | 54    | 9       | 45      | E    | 1           | 181362.045   | 0.201                      | 522.8415  |
| 41   | 17     | 24     | 41    | 16      | 25      | A    | 0           | 181363.177   | 0.070                      | 294.1759  |
| 41   | 17     | 25     | 41    | 16      | 26      | A    | 0           | 181364.319   | -0.040                     | 294.1758  |
| 29   | 12     | 18     | 28    | 12      | 17      | A    | 0           | 181396.299   | 0.024                      | 178.5525  |
| 31   | 4      | 27     | 30    | 4       | 26      | A    | 1           | 181399.654   | 0.016                      | 295.3747  |
| 31   | 5      | 27     | 30    | 4       | 26      | A    | 1           | 181422.471   | 0.013                      | 295.3747  |
| 32   | 3      | 29     | 31    | 4       | 28      | A    | 1           | 181424.919   | 0.002                      | 297.3295  |
| 32   | 4      | 29     | 31    | 3       | 28      | A    | 1           | 181426.692   | 0.012                      | 297.3295  |
| 53   | 18     | 36     | 53    | 17      | 37      | A    | 0           | 181442.989   | -0.025                     | 420.0990  |
| 30   | 6      | 25     | 29    | 6       | 24      | A    | 1           | 181444.116   | 0.107                      | 292.9280  |
| 31   | 4      | 27     | 30    | 5       | 26      | E    | 1           | 181479.044   | 0.027                      | 295.0928  |
| 31   | 4      | 27     | 30    | 5       | 26      | E    | 0           | 181499.651   | 0.001                      | 166.7636  |
| 31   | 4      | 27     | 30    | 5       | 26      | A    | 0           | 181503.391   | 0.025                      | 166.7548  |
| 31   | 5      | 27     | 30    | 5       | 26      | E    | 1           | 181504.881   | 0.137                      | 295.0928  |
| 32   | 3      | 29     | 31    | 4       | 28      | E    | 1           | 181520.898   | -0.062                     | 297.0338  |
| 32   | 4      | 29     | 31    | 3       | 28      | E    | 1           | 181523.058   | 0.078                      | 297.0337  |
| 31   | 5      | 27     | 30    | 5       | 26      | E    | 0           | 181524.260   | 0.024                      | 166.7636  |
| 31   | 4      | 27     | 30    | 4       | 26      | E    | 1           | 181526.437   | -0.004                     | 295.0912  |
| 31   | 4      | 27     | 30    | 4       | 26      | E    | 0           | 181545.083   | -0.018                     | 166.7621  |
| 32   | 3      | 29     | 31    | 4       | 28      | E    | 0           | 181547.304   | 0.006                      | 168.7062  |
| 31   | 4      | 27     | 30    | 4       | 26      | A    | 0           | 181549.125   | 0.121                      | 166.7532  |
| 32   | 4      | 29     | 31    | 3       | 28      | E    | 0           | 181549.125   | -0.092                     | 168.7062  |
| 32   | 3      | 29     | 31    | 4       | 28      | A    | 0           | 181550.259   | 0.013                      | 168.6970  |
| 54   | 10     | 44     | 54    | 9       | 45      | E    | 0           | 181568.184   | -0.047                     | 394.5530  |
| 31   | 5      | 27     | 30    | 4       | 26      | E    | 0           | 181569.670   | -0.017                     | 166.7621  |
| 33   | 2      | 31     | 32    | 2       | 30      | A    | 1           | 181572.002   | -0.028                     | 298.8271  |
| 33   | 2      | 31     | 32    | 3       | 30      | A    | 1           | 181572.002   | -0.008                     | 298.8271  |
| 33   | 3      | 31     | 32    | 2       | 30      | A    | 1           | 181572.002   | -0.037                     | 298.8271  |
| 33   | 3      | 31     | 32    | 3       | 30      | A    | 1           | 181572.002   | -0.018                     | 298.8271  |
| 30   | 6      | 25     | 29    | 6       | 24      | E    | 0           | 181606.319   | 0.015                      | 164.3220  |
| 30   | 6      | 25     | 29    | 6       | 24      | A    | 0           | 181610.767   | -0.013                     | 164.3134  |
| 33   | 2      | 31     | 32    | 2       | 30      | E    | 1           | 181640.959   | -0.028                     | 298.5128  |
| 33   | 2      | 31     | 32    | 3       | 30      | E    | 1           | 181640.959   | -0.006                     | 298.5128  |
| 33   | 3      | 31     | 32    | 2       | 30      | E    | 1           | 181640.959   | -0.039                     | 298.5128  |
| 33   | 3      | 31     | 32    | 3       | 30      | E    | 1           | 181640.959   | -0.017                     | 298.5128  |
| 30   | 6      | 24     | 29    | 7       | 23      | A    | 0           | 181649.516   | 0.003                      | 167.4289  |
| 30   | 6      | 24     | 29    | 7       | 23      | E    | 0           | 181659.602   | -0.033                     | 167.4373  |
| 33   | 2      | 31     | 32    | 2       | 30      | E    | 0           | 181673.240   | -0.012                     | 170.1887  |
| 33   | 3      | 31     | 32    | 3       | 30      | E    | 0           | 181673.240   | 0.009                      | 170.1887  |
| 33   | 3      | 31     | 32    | 2       | 30      | E    | 0           | 181673.240   | -0.022                     | 170.1887  |
| 33   | 3      | 31     | 32    | 3       | 30      | E    | 0           | 181673.240   | -0.001                     | 170.1887  |
| 33   | 2      | 31     | 32    | 2       | 30      | A    | 0           | 181675.354   | -0.014                     | 170.1789  |
| 33   | 2      | 31     | 32    | 3       | 30      | A    | 0           | 181675.354   | 0.008                      | 170.1789  |
| 33   | 3      | 31     | 32    | 2       | 30      | A    | 0           | 181675.354   | -0.024                     | 170.1789  |
| 33   | 3      | 31     | 32    | 3       | 30      | A    | 0           | 181675.354   | -0.003                     | 170.1789  |
| 18   | 7      | 12     | 17    | 6       | 11      | E    | 0           | 181749.582   | 0.003                      | 105.9384  |
| 34   | 1      | 33     | 33    | 1       | 32      | A    | 1           | 181766.549   | 0.006                      | 299.8965  |
| 34   | 1      | 33     | 33    | 2       | 32      | A    | 1           | 181766.549   | 0.006                      | 299.8965  |
| 34   | 2      | 33     | 33    | 1       | 32      | A    | 1           | 181766.549   | 0.006                      | 299.8965  |
| 34   | 2      | 33     | 33    | 2       | 32      | A    | 1           | 181766.549   | 0.006                      | 299.8965  |
| 34   | 1      | 33     | 33    | 1       | 32      | E    | 1           | 181807.840   | -0.025                     | 299.5577  |
| 34   | 1      | 33     | 33    | 2       | 32      | E    | 1           | 181807.840   | -0.025                     | 299.5577  |
| 34   | 2      | 33     | 33    | 1       | 32      | E    | 1           | 181807.840   | -0.026                     | 299.5577  |
| 34   | 2      | 33     | 33    | 2       | 32      | E    | 1           | 181807.840   | -0.025                     | 299.5577  |
| 18   | 7      | 12     | 17    | 6       | 11      | A    | 0           | 181829.272   | -0.008                     | 105.9286  |
| 34   | 1      | 33     | 33    | 1       | 32      | E    | 0           | 181846.022   | 0.018                      | 171.2387  |
| 34   | 2      | 33     | 33    | 2       | 32      | E    | 0           | 181846.022   | 0.018                      | 171.2387  |
| 34   | 1      | 33     | 33    | 1       | 32      | A    | 0           | 181847.242   | -0.031                     | 171.2281  |
| 34   | 1      | 33     | 33    | 2       | 32      | A    | 0           | 181847.242   | -0.030                     | 171.2281  |
| 34   | 2      | 33     | 33    | 1       | 32      | A    | 0           | 181847.242   | -0.031                     | 171.2281  |
| 34   | 2      | 33     | 33    | 2       | 32      | A    | 0           | 181847.242   | -0.030                     | 171.2281  |
| 48   | 7      | 41     | 48    | 6       | 42      | E    | 1           | 181868.278   | -0.011                     | 443.2229  |
| 48   | 8      | 41     | 48    | 7       | 42      | E    | 1           | 181870.713   | -0.008                     | 443.2229  |
| 41   | 3      | 38     | 41    | 2       | 39      | E    | 0           | 181916.659   | 0.049                      | 230.8851  |
| 41   | 4      | 38     | 41    | 3       | 39      | E    | 0           | 181916.659   | 0.048                      | 230.8851  |
| 41   | 3      | 38     | 41    | 2       | 39      | A    | 0           | 181943.659   | 0.010                      | 230.8760  |
| 41   | 4      | 38     | 41    | 3       | 39      | A    | 0           | 181943.659   | 0.008                      | 230.8760  |
| 35   | 0      | 35     | 34    | 0       | 34      | A    | 1           | 181981.800   | 0.036                      | 300.5554  |
| 35   | 0      | 35     | 34    | 1       | 34      | A    | 1           | 181981.800   | 0.036                      | 300.5554  |
| 35   | 1      | 35     | 34    | 0       | 34      | A    | 1           | 181981.800   | 0.036                      | 300.5554  |
| 35   | 1      | 35     | 34    | 1       | 34      | A    | 1           | 181981.800   | 0.036                      | 300.5554  |
| 35   | 0      | 35     | 34    | 0       | 34      | E    | 1           | 181993.547   | -0.029                     | 300.1860  |
| 35   | 0      | 35     | 34    | 1       | 34      | E    | 1           | 181993.547   | -0.029                     | 300.1860  |
| 35   | 1      | 35     | 34    | 0       | 34      | E    | 1           | 181993.547   | -0.029                     | 300.1860  |
| 35   | 1      | 35     | 34    | 1       | 34      | E    | 1           | 181993.547   | -0.029                     | 300.1860  |
| 30   | 5      | 25     | 29    | 5       | 24      | E    | 1           | 182009.331   | -0.092                     | 292.6170  |
| 30   | 5      | 25     | 29    | 5       | 24      | E    | 0           | 182010.401   | 0.007                      | 164.2895  |
| 30   | 5      | 25     | 29    | 5       | 24      | A    | 0           | 182016.124   | 0.011                      | 164.2807  |
| 41   | 3      | 38     | 41    | 2       | 39      | E    | 1           | 182026.366   | -0.106                     | 359.1978  |
| 41   | 4      | 38     | 41    | 3       | 39      | E    | 1           | 182026.366   | -0.107                     | 359.1978  |
| 52   | 9      | 43     | 52    | 8       | 44      | E    | 1           | 182031.481   | 0.141                      | 495.2695  |
| 35   | 0      | 35     | 34    | 0       | 34      | A    | 0           | 182038.197   | -0.207                     | 171.8623  |
| 35   | 0      | 35     | 34    | 1       | 34      | A    | 0           | 182038.197   | -0.207                     | 171.8623  |
| 35   | 1      | 35     | 34    | 0       | 34      | A    | 0           | 182038.197   | -0.207                     | 171.8623  |
| 35   | 1      | 35     | 34    | 1       | 34      | A    | 0           | 182038.197   | -0.207                     | 171.8623  |
| 35   | 0      | 35     | 34    | 0       | 34      | E    | 0           | 182038.197   | 0.161                      | 171.8738  |
| 35   | 1      | 35     | 34    | 1       | 34      | E    | 0           | 182038.197   | 0.161                      | 171.8738  |
| 40   | 17     | 23     | 40    | 16      | 24      | E    | 0           | 182049.218   | -0.071                     | 285.6043  |
| 40   | 17     | 24     | 40    | 16      | 25      | E    | 0           | 182059.509   | 0.018                      | 285.5915  |
| 52   | 10     | 43     | 52    | 9       | 44      | E    | 1           | 182066.728   | 0.150                      | 495.2696  |
| 29   | 11     | 19     | 28    | 11      | 18      | A    | 0           | 182166.783   | -0.062                     | 174.3256  |
| 50   | 8      | 42     | 50    | 7       | 43      | E    | 1           | 182173.061   | 0.082                      | 468.7268  |
| 52   | 9      | 43     | 52    | 8       | 44      | E    | 0           | 182181.837   | 0.017                      | 366.9724  |
| 29   | 11     | 19     | 28    | 11      | 18      | E    | 0           | 182185.928   | 0.063                      | 174.3239  |
| 29   | 11     | 18     | 28    | 11      | 17      | E    | 0           | 182187.099   | 0.001                      | 174.3365  |
| 52   | 9      | 43     | 52    | 8       | 44      | A    | 0           | 182190.233   | -0.052                     | 366.9688  |
| 29   | 11     | 18     | 28    | 11      | 17      | A    | 0           | 182201.358   | -0.028                     | 174.3267  |
| 50   | 9      | 42     | 50    | 8       | 43      | A    | 0           | 182294.537   | -0.047                     | 340.4185  |
| 66   | 20     | 46     | 66    | 19      | 47      | E    | 0           | 182356.423   | -0.054                     | 598.4889  |
| 12   | 10     | 3      | 11    | 9       | 3       | E    | 0           | 182375.344   | -0.034                     | 96.2448   |
| 12   | 10     | 2      | 11    | 9       | 2       | E    | 0           | 182397.181   | -0.037                     | 96.2567   |
| 12   | 10     | 2      | 11    | 9       | 3       | A    | 0           | 182422.898   | 0.017                      | 96.2447   |
| 12   | 10     | 3      | 11    | 9       | 2       | A    | 0           | 182422.898   | 0.017                      | 96.2447   |
| 61   | 19     | 43     | 61    | 18      | 44      | A    | 0           | 182444.656   | 0.024                      | 523.8532  |
| 30   | 6      | 25     | 29    | 5       | 24      | E    | 0           | 182581.927   | -0.049                     | 164.2895  |
| 30   | 6      | 25     | 29    | 5       | 24      | A    | 0           | 182589.722   | -0.019                     | 164.2807  |
| 30   | 6      | 25     | 29    | 5       | 24      | E    | 1           | 182602.102   | 0.017                      | 292.6170  |
| 39   | 17     | 22     | 39    | 16      | 23      | E    | 0           | 182721.369   | -0.072                     | 277.2477  |
| 39   | 17     | 23     | 39    | 16      | 24      | E    | 0           | 182732.206   | -0.009                     | 277.2349  |
| 39   | 17     | 22     | 39    | 16      | 23      | A    | 0           | 182769.328   | 0.108                      | 277.2437  |
| 52   | 18     | 34     | 52    | 17      | 35      | A    | 0           | 182815.147   | -0.003                     | 408.8761  |
| 52   | 18     | 34     | 52    | 17      | 35      | E    | 0           | 182830.167   | -0.037                     | 408.8773  |
| 52   | 18     | 35     | 52    | 17      | 36      | E    | 0           | 182899.707   | -0.003                     | 408.8636  |



| $J'$ | $K'_a$ | $K'_c$ | $J''$ | $K''_a$ | $K''_c$ | Sym. | $v_{tCH_3}$ | $\nu_{Obs.}$ | $\nu_{Obs.} - \nu_{Calc.}$ | $E_{low}$ |
|------|--------|--------|-------|---------|---------|------|-------------|--------------|----------------------------|-----------|
| 61   | 14     | 48     | 61    | 13      | 49      | A    | 0           | 182927.475   | -0.132                     | 495.9467  |
| 61   | 14     | 48     | 61    | 13      | 49      | E    | 0           | 182930.925   | -0.059                     | 495.9480  |
| 43   | 4      | 39     | 43    | 3       | 40      | A    | 1           | 182945.256   | 0.376                      | 381.2257  |
| 43   | 5      | 39     | 43    | 4       | 40      | A    | 1           | 182945.256   | 0.368                      | 381.2257  |
| 29   | 10     | 20     | 28    | 10      | 19      | A    | 0           | 183151.069   | 0.081                      | 170.5353  |
| 14   | 9      | 6      | 13    | 8       | 6       | E    | 0           | 183174.881   | -0.001                     | 98.1666   |
| 28   | 8      | 20     | 27    | 8       | 19      | A    | 0           | 183180.205   | -0.039                     | 158.6659  |
| 29   | 10     | 20     | 28    | 10      | 19      | E    | 0           | 183183.729   | -0.024                     | 170.5384  |
| 28   | 8      | 20     | 27    | 8       | 19      | E    | 0           | 183186.808   | 0.000                      | 158.6745  |
| 14   | 9      | 5      | 13    | 8       | 5       | E    | 0           | 183201.658   | -0.071                     | 98.1776   |
| 14   | 9      | 5      | 13    | 8       | 6       | A    | 0           | 183222.510   | -0.030                     | 98.1648   |
| 38   | 17     | 21     | 38    | 16      | 22      | E    | 0           | 183336.889   | -0.035                     | 269.1094  |
| 38   | 17     | 22     | 38    | 16      | 23      | E    | 0           | 183348.214   | -0.005                     | 269.0965  |
| 38   | 17     | 21     | 38    | 16      | 22      | A    | 0           | 183384.713   | 0.029                      | 269.1054  |
| 29   | 10     | 19     | 28    | 10      | 18      | E    | 0           | 183462.149   | -0.004                     | 170.5553  |
| 29   | 10     | 19     | 28    | 10      | 18      | A    | 0           | 183488.749   | -0.011                     | 170.5475  |
| 43   | 4      | 39     | 43    | 3       | 40      | E    | 0           | 183664.485   | -0.003                     | 252.6536  |
| 43   | 5      | 39     | 43    | 4       | 40      | E    | 0           | 183664.485   | -0.011                     | 252.6536  |
| 29   | 8      | 22     | 28    | 8       | 21      | A    | 0           | 183684.653   | -0.043                     | 164.2143  |
| 29   | 8      | 22     | 28    | 8       | 21      | E    | 0           | 183684.653   | 0.023                      | 164.2221  |
| 43   | 4      | 39     | 43    | 3       | 40      | A    | 0           | 183688.930   | 0.066                      | 252.6456  |
| 43   | 5      | 39     | 43    | 4       | 40      | A    | 0           | 183688.930   | 0.057                      | 252.6456  |
| 16   | 8      | 9      | 15    | 7       | 9       | E    | 0           | 183701.141   | -0.023                     | 101.3535  |
| 16   | 8      | 9      | 15    | 7       | 8       | A    | 0           | 183728.061   | -0.024                     | 101.3506  |
| 16   | 8      | 8      | 15    | 7       | 8       | E    | 0           | 183731.388   | -0.020                     | 101.3633  |
| 43   | 4      | 39     | 43    | 3       | 40      | E    | 1           | 183736.312   | -0.071                     | 380.9671  |
| 43   | 5      | 39     | 43    | 4       | 40      | E    | 1           | 183736.312   | -0.080                     | 380.9671  |
| 16   | 8      | 8      | 15    | 7       | 9       | A    | 0           | 183767.372   | 0.060                      | 101.3494  |
| 37   | 17     | 20     | 37    | 16      | 21      | E    | 0           | 183900.063   | -0.045                     | 261.1885  |
| 37   | 17     | 21     | 37    | 16      | 22      | E    | 0           | 183911.960   | 0.087                      | 261.1755  |
| 37   | 17     | 20     | 37    | 16      | 21      | A    | 0           | 183947.817   | 0.003                      | 261.1845  |
| 40   | 2      | 38     | 40    | 1       | 39      | A    | 1           | 183999.013   | -0.217                     | 345.9298  |
| 40   | 3      | 38     | 40    | 2       | 39      | A    | 1           | 183999.013   | -0.217                     | 345.9298  |
| 29   | 9      | 21     | 28    | 9       | 20      | A    | 0           | 184029.813   | -0.036                     | 167.1879  |
| 29   | 9      | 21     | 28    | 9       | 20      | E    | 0           | 184035.258   | -0.001                     | 167.1944  |
| 66   | 16     | 51     | 66    | 15      | 52      | E    | 0           | 184136.855   | -0.025                     | 574.9745  |
| 59   | 12     | 47     | 59    | 11      | 48      | A    | 0           | 184245.552   | -0.103                     | 464.8077  |
| 59   | 12     | 47     | 59    | 11      | 48      | E    | 0           | 184248.995   | -0.055                     | 464.8094  |
| 29   | 6      | 23     | 28    | 6       | 22      | A    | 1           | 184305.415   | 0.125                      | 289.6513  |
| 51   | 18     | 33     | 51    | 17      | 34      | E    | 0           | 184352.229   | -0.017                     | 397.8742  |
| 51   | 18     | 33     | 51    | 17      | 34      | A    | 0           | 184359.317   | -0.015                     | 397.8722  |
| 60   | 19     | 42     | 60    | 18      | 43      | E    | 0           | 184377.161   | 0.006                      | 510.8241  |
| 51   | 18     | 34     | 51    | 17      | 35      | E    | 0           | 184379.931   | 0.000                      | 397.8619  |
| 36   | 17     | 19     | 36    | 16      | 20      | E    | 0           | 184414.897   | -0.053                     | 253.4842  |
| 36   | 17     | 20     | 36    | 16      | 21      | E    | 0           | 184427.117   | -0.027                     | 253.4712  |
| 36   | 17     | 20     | 36    | 16      | 21      | A    | 0           | 184462.601   | -0.009                     | 253.4803  |
| 51   | 18     | 34     | 51    | 17      | 35      | A    | 0           | 184466.395   | -0.023                     | 397.8683  |
| 60   | 19     | 42     | 60    | 18      | 43      | A    | 0           | 184475.809   | -0.025                     | 510.8262  |
| 18   | 7      | 11     | 17    | 6       | 12      | A    | 0           | 184485.934   | -0.013                     | 105.8545  |
| 18   | 7      | 11     | 17    | 6       | 12      | E    | 0           | 184507.812   | -0.034                     | 105.8637  |
| 68   | 20     | 49     | 68    | 19      | 50      | E    | 0           | 184541.160   | -0.022                     | 627.2019  |
| 29   | 6      | 23     | 28    | 6       | 22      | E    | 0           | 184565.774   | -0.006                     | 161.0358  |
| 29   | 6      | 23     | 28    | 6       | 22      | A    | 0           | 184575.451   | 0.014                      | 161.0265  |
| 68   | 20     | 49     | 68    | 19      | 50      | A    | 0           | 184592.862   | -0.022                     | 627.2031  |
| 29   | 6      | 23     | 28    | 6       | 22      | E    | 1           | 184597.565   | 0.069                      | 289.3550  |
| 40   | 2      | 38     | 40    | 1       | 39      | E    | 0           | 184840.843   | 0.025                      | 217.2914  |
| 40   | 3      | 38     | 40    | 2       | 39      | E    | 0           | 184840.843   | 0.025                      | 217.2914  |
| 35   | 17     | 18     | 35    | 16      | 19      | E    | 0           | 184885.046   | -0.014                     | 245.9958  |
| 35   | 17     | 19     | 35    | 16      | 20      | E    | 0           | 184897.639   | -0.002                     | 245.9828  |
| 35   | 17     | 18     | 35    | 16      | 19      | A    | 0           | 184932.628   | -0.005                     | 245.9920  |
| 40   | 2      | 38     | 40    | 1       | 39      | E    | 1           | 184990.662   | -0.033                     | 345.6005  |
| 40   | 3      | 38     | 40    | 2       | 39      | E    | 1           | 184990.662   | -0.033                     | 345.6005  |
| 45   | 5      | 40     | 45    | 4       | 41      | E    | 0           | 185122.002   | 0.044                      | 275.4971  |
| 45   | 6      | 40     | 45    | 5       | 41      | E    | 0           | 185122.002   | -0.007                     | 275.4971  |
| 45   | 5      | 40     | 45    | 4       | 41      | A    | 0           | 185143.610   | 0.065                      | 275.4900  |
| 45   | 6      | 40     | 45    | 5       | 41      | A    | 0           | 185143.610   | 0.013                      | 275.4900  |
| 45   | 5      | 40     | 45    | 4       | 41      | E    | 1           | 185154.157   | -0.026                     | 403.8099  |
| 45   | 6      | 40     | 45    | 5       | 41      | E    | 1           | 185154.157   | -0.082                     | 403.8099  |
| 30   | 20     | 10     | 29    | 20      | 9       | A    | 0           | 185243.773   | -0.085                     | 232.8469  |
| 30   | 20     | 11     | 29    | 20      | 10      | A    | 0           | 185243.773   | -0.085                     | 232.8469  |
| 30   | 20     | 10     | 29    | 20      | 9       | E    | 0           | 185244.571   | 0.058                      | 232.8441  |
| 34   | 17     | 17     | 34    | 16      | 18      | E    | 0           | 185313.745   | 0.003                      | 238.7226  |
| 28   | 7      | 21     | 27    | 7       | 20      | E    | 0           | 185319.481   | -0.131                     | 156.7857  |
| 28   | 7      | 21     | 27    | 7       | 20      | A    | 0           | 185320.818   | -0.020                     | 156.7761  |
| 34   | 17     | 18     | 34    | 16      | 19      | E    | 0           | 185326.672   | -0.003                     | 238.7096  |
| 34   | 17     | 17     | 34    | 16      | 18      | A    | 0           | 185361.237   | -0.011                     | 238.7188  |
| 30   | 19     | 12     | 29    | 19      | 11      | A    | 0           | 185401.895   | -0.100                     | 225.4416  |
| 30   | 19     | 11     | 29    | 19      | 10      | A    | 0           | 185401.895   | -0.100                     | 225.4416  |
| 30   | 19     | 12     | 29    | 19      | 11      | E    | 0           | 185402.820   | 0.062                      | 225.4293  |
| 30   | 18     | 12     | 29    | 18      | 11      | A    | 0           | 185587.064   | -0.109                     | 218.4241  |
| 30   | 18     | 13     | 29    | 18      | 12      | A    | 0           | 185587.064   | -0.109                     | 218.4241  |
| 30   | 18     | 13     | 29    | 18      | 12      | E    | 0           | 185588.064   | -0.052                     | 218.4125  |
| 33   | 17     | 16     | 33    | 16      | 17      | E    | 0           | 185703.973   | -0.062                     | 231.6640  |
| 33   | 17     | 17     | 33    | 16      | 18      | E    | 0           | 185717.298   | 0.013                      | 231.6509  |
| 50   | 18     | 32     | 50    | 17      | 33      | E    | 0           | 185732.047   | -0.075                     | 387.1007  |
| 50   | 18     | 33     | 50    | 17      | 34      | E    | 0           | 185747.023   | -0.028                     | 387.0888  |
| 33   | 17     | 17     | 33    | 16      | 18      | A    | 0           | 185751.505   | 0.026                      | 231.6602  |
| 33   | 17     | 16     | 33    | 16      | 17      | A    | 0           | 185751.505   | 0.027                      | 231.6602  |
| 50   | 18     | 32     | 50    | 17      | 33      | A    | 0           | 185756.709   | 0.009                      | 387.0982  |
| 57   | 11     | 46     | 57    | 10      | 47      | E    | 1           | 185786.944   | 0.358                      | 562.9534  |
| 30   | 17     | 14     | 29    | 17      | 13      | A    | 0           | 185806.305   | -0.093                     | 211.7957  |
| 30   | 17     | 13     | 29    | 17      | 12      | A    | 0           | 185806.305   | -0.093                     | 211.7957  |
| 30   | 17     | 14     | 29    | 17      | 13      | E    | 0           | 185807.383   | -0.172                     | 211.7850  |
| 50   | 18     | 33     | 50    | 17      | 34      | A    | 0           | 185814.246   | -0.029                     | 387.0961  |
| 67   | 15     | 52     | 67    | 14      | 53      | E    | 0           | 186022.706   | 0.039                      | 588.9063  |
| 57   | 11     | 46     | 57    | 10      | 47      | E    | 0           | 186046.990   | -0.016                     | 434.6775  |
| 57   | 11     | 46     | 57    | 10      | 47      | A    | 0           | 186048.462   | -0.097                     | 434.6753  |
| 32   | 17     | 15     | 32    | 16      | 16      | E    | 0           | 186058.699   | -0.047                     | 224.8192  |
| 32   | 17     | 16     | 32    | 16      | 17      | E    | 0           | 186072.338   | 0.054                      | 224.8061  |
| 42   | 3      | 39     | 42    | 2       | 40      | A    | 1           | 186088.842   | 0.086                      | 367.0872  |
| 42   | 4      | 39     | 42    | 3       | 40      | A    | 1           | 186088.842   | 0.086                      | 367.0872  |
| 32   | 17     | 16     | 32    | 16      | 17      | A    | 0           | 186106.086   | -0.044                     | 224.8155  |
| 32   | 17     | 15     | 32    | 16      | 16      | A    | 0           | 186106.086   | -0.043                     | 224.8155  |
| 19   | 7      | 13     | 18    | 6       | 12      | A    | 0           | 186127.484   | -0.025                     | 109.7686  |
| 29   | 9      | 20     | 28    | 9       | 19      | A    | 0           | 186244.119   | -0.037                     | 167.2932  |
| 29   | 9      | 20     | 28    | 9       | 19      | E    | 0           | 186247.478   | 0.095                      | 167.3004  |
| 31   | 5      | 26     | 30    | 6       | 25      | A    | 1           | 186252.559   | 0.001                      | 298.9803  |
| 47   | 7      | 41     | 47    | 6       | 42      | E    | 1           | 186259.211   | -0.105                     | 427.7185  |
| 47   | 6      | 41     | 47    | 5       | 42      | E    | 0           | 186268.288   | 0.102                      | 299.4076  |
| 47   | 7      | 41     | 47    | 6       | 42      | E    | 0           | 186268.288   | -0.165                     | 299.4076  |
| 47   | 6      | 41     | 47    | 5       | 42      | A    | 0           | 186286.975   | 0.111                      | 299.4016  |
| 47   | 7      | 41     | 47    | 6       | 42      | A    | 0           | 186286.975   | -0.157                     | 299.4016  |
| 36   | 9      | 27     | 35    | 10      | 26      | E    | 0           | 186333.431   | 0.065                      | 217.9781  |
| 31   | 5      | 26     | 30    | 6       | 25      | E    | 1           | 186369.011   | -0.069                     | 298.7080  |
| 31   | 17     | 14     | 31    | 16      | 15      | E    | 0           | 186380.410   | -0.065                     | 218.1877  |
| 30   | 15     | 16     | 29    | 15      | 15      | A    | 0           | 186388.885   | -0.059                     | 199.7158  |



| $J'$ | $K'_a$ | $K'_c$ | $J''$ | $K''_a$ | $K''_c$ | Sym. | $v_{tCH_3}$ | $\nu_{Obs.}$ | $\nu_{Obs.} - \nu_{Calc.}$ | $E_{low}$ |
|------|--------|--------|-------|---------|---------|------|-------------|--------------|----------------------------|-----------|
| 30   | 15     | 15     | 29    | 15      | 14      | A    | 0           | 186388.885   | -0.060                     | 199.7158  |
| 30   | 15     | 15     | 29    | 15      | 14      | E    | 0           | 186389.914   | 0.050                      | 199.7210  |
| 30   | 15     | 16     | 29    | 15      | 15      | E    | 0           | 186390.737   | 0.059                      | 199.7075  |
| 31   | 17     | 15     | 31    | 16      | 16      | E    | 0           | 186394.277   | 0.005                      | 218.1746  |
| 31   | 5      | 26     | 30    | 6       | 25      | E    | 0           | 186396.558   | -0.009                     | 170.3797  |
| 31   | 5      | 26     | 30    | 6       | 25      | A    | 0           | 186399.853   | -0.023                     | 170.3712  |
| 31   | 17     | 15     | 31    | 16      | 16      | A    | 0           | 186427.829   | 0.026                      | 218.1840  |
| 31   | 17     | 14     | 31    | 16      | 15      | A    | 0           | 186427.829   | 0.026                      | 218.1840  |
| 67   | 20     | 48     | 67    | 19      | 49      | A    | 0           | 186427.829   | -0.447                     | 612.6106  |
| 30   | 7      | 24     | 29    | 7       | 23      | E    | 0           | 186436.235   | -0.079                     | 167.4373  |
| 30   | 7      | 24     | 29    | 7       | 23      | A    | 0           | 186440.136   | -0.018                     | 167.4289  |
| 59   | 19     | 41     | 59    | 18      | 42      | A    | 0           | 186461.339   | -0.046                     | 498.0330  |
| 32   | 4      | 28     | 31    | 5       | 27      | A    | 1           | 186474.067   | -0.004                     | 301.4263  |
| 32   | 5      | 28     | 31    | 5       | 27      | A    | 1           | 186486.314   | 0.056                      | 301.4263  |
| 32   | 5      | 28     | 31    | 4       | 27      | A    | 1           | 186508.905   | -0.172                     | 301.4256  |
| 33   | 3      | 30     | 32    | 4       | 29      | A    | 1           | 186545.154   | -0.005                     | 303.3812  |
| 33   | 4      | 30     | 32    | 3       | 29      | A    | 1           | 186546.084   | 0.031                      | 303.3812  |
| 64   | 15     | 50     | 64    | 14      | 51      | A    | 0           | 186551.596   | -0.065                     | 541.3361  |
| 64   | 15     | 50     | 64    | 14      | 51      | E    | 0           | 186556.834   | -0.044                     | 541.3368  |
| 31   | 6      | 26     | 30    | 6       | 25      | A    | 1           | 186561.347   | 0.027                      | 298.9803  |
| 32   | 4      | 28     | 31    | 5       | 27      | E    | 1           | 186595.847   | -0.043                     | 301.1471  |
| 32   | 5      | 28     | 31    | 5       | 27      | E    | 1           | 186609.619   | -0.098                     | 301.1471  |
| 32   | 4      | 28     | 31    | 5       | 27      | E    | 0           | 186617.935   | -0.001                     | 172.8186  |
| 32   | 4      | 28     | 31    | 5       | 27      | A    | 0           | 186621.650   | -0.017                     | 172.8099  |
| 32   | 5      | 28     | 31    | 5       | 27      | E    | 0           | 186631.108   | -0.004                     | 172.8186  |
| 32   | 5      | 28     | 31    | 4       | 27      | E    | 1           | 186635.438   | -0.007                     | 301.1462  |
| 33   | 3      | 30     | 32    | 4       | 29      | E    | 1           | 186640.504   | -0.062                     | 303.0887  |
| 33   | 4      | 30     | 32    | 3       | 29      | E    | 1           | 186641.503   | -0.094                     | 303.0887  |
| 32   | 4      | 28     | 31    | 4       | 27      | E    | 0           | 186642.562   | 0.040                      | 172.8178  |
| 32   | 4      | 28     | 31    | 4       | 27      | A    | 0           | 186646.370   | 0.012                      | 172.8091  |
| 32   | 5      | 28     | 31    | 4       | 27      | E    | 0           | 186655.687   | -0.010                     | 172.8178  |
| 32   | 5      | 28     | 31    | 4       | 27      | A    | 0           | 186659.588   | -0.005                     | 172.8091  |
| 65   | 20     | 45     | 65    | 19      | 46      | E    | 0           | 186666.294   | -0.109                     | 584.2686  |
| 33   | 3      | 30     | 32    | 4       | 29      | E    | 0           | 186668.535   | -0.022                     | 174.7620  |
| 33   | 4      | 30     | 32    | 3       | 29      | E    | 0           | 186669.532   | -0.003                     | 174.7620  |
| 33   | 3      | 30     | 32    | 4       | 29      | A    | 0           | 186671.496   | 0.009                      | 174.7529  |
| 33   | 4      | 30     | 32    | 3       | 29      | A    | 0           | 186672.493   | 0.024                      | 174.7528  |
| 30   | 17     | 14     | 30    | 16      | 15      | E    | 0           | 186685.713   | 0.042                      | 211.7557  |
| 34   | 2      | 32     | 33    | 2       | 31      | A    | 1           | 186697.758   | 0.016                      | 304.8837  |
| 34   | 2      | 32     | 33    | 3       | 31      | A    | 1           | 186697.758   | 0.016                      | 304.8837  |
| 34   | 3      | 32     | 33    | 2       | 31      | A    | 1           | 186697.758   | 0.002                      | 304.8837  |
| 34   | 3      | 32     | 33    | 3       | 31      | A    | 1           | 186697.758   | 0.011                      | 304.8837  |
| 31   | 6      | 26     | 30    | 6       | 25      | E    | 1           | 186711.835   | -0.026                     | 298.7080  |
| 30   | 17     | 14     | 30    | 16      | 15      | A    | 0           | 186718.894   | -0.021                     | 211.7653  |
| 30   | 17     | 13     | 30    | 16      | 14      | A    | 0           | 186718.894   | -0.021                     | 211.7653  |
| 31   | 6      | 26     | 30    | 6       | 25      | E    | 0           | 186726.117   | -0.017                     | 170.3797  |
| 31   | 6      | 26     | 30    | 6       | 25      | A    | 0           | 186730.707   | 0.018                      | 170.3712  |
| 34   | 2      | 32     | 33    | 2       | 31      | E    | 1           | 186766.381   | -0.012                     | 304.5717  |
| 34   | 2      | 32     | 33    | 3       | 31      | E    | 1           | 186766.381   | -0.001                     | 304.5717  |
| 34   | 3      | 32     | 33    | 2       | 31      | E    | 1           | 186766.381   | -0.017                     | 304.5717  |
| 34   | 3      | 32     | 33    | 3       | 31      | E    | 1           | 186766.381   | -0.006                     | 304.5717  |
| 30   | 14     | 17     | 29    | 14      | 16      | A    | 0           | 186784.880   | -0.056                     | 194.2712  |
| 30   | 14     | 16     | 29    | 14      | 15      | E    | 0           | 186785.968   | 0.076                      | 194.2778  |
| 30   | 14     | 17     | 29    | 14      | 16      | E    | 0           | 186787.011   | -0.069                     | 194.2643  |
| 31   | 5      | 26     | 30    | 5       | 25      | A    | 1           | 186789.927   | 0.037                      | 298.9624  |
| 34   | 2      | 32     | 33    | 2       | 31      | E    | 0           | 186800.144   | -0.020                     | 176.2486  |
| 34   | 2      | 32     | 33    | 3       | 31      | E    | 0           | 186800.144   | -0.009                     | 176.2486  |
| 34   | 3      | 32     | 33    | 2       | 31      | E    | 0           | 186800.144   | -0.025                     | 176.2486  |
| 34   | 3      | 32     | 33    | 3       | 31      | E    | 0           | 186800.144   | -0.014                     | 176.2486  |
| 34   | 2      | 32     | 33    | 2       | 31      | A    | 0           | 186802.253   | -0.017                     | 176.2389  |
| 34   | 2      | 32     | 33    | 3       | 31      | A    | 0           | 186802.253   | -0.007                     | 176.2389  |
| 34   | 3      | 32     | 33    | 2       | 31      | A    | 0           | 186802.253   | -0.022                     | 176.2389  |
| 34   | 3      | 32     | 33    | 3       | 31      | A    | 0           | 186802.253   | -0.012                     | 176.2389  |
| 42   | 3      | 39     | 42    | 2       | 40      | E    | 0           | 186880.184   | 0.022                      | 238.4843  |
| 42   | 4      | 39     | 42    | 3       | 40      | E    | 0           | 186880.184   | 0.022                      | 238.4843  |
| 55   | 10     | 45     | 55    | 9       | 46      | E    | 1           | 186885.178   | 0.246                      | 533.8443  |
| 35   | 1      | 34     | 34    | 1       | 33      | A    | 1           | 186894.091   | 0.011                      | 305.9596  |
| 35   | 1      | 34     | 34    | 2       | 33      | A    | 1           | 186894.091   | 0.011                      | 305.9596  |
| 35   | 2      | 34     | 34    | 1       | 33      | A    | 1           | 186894.091   | 0.011                      | 305.9596  |
| 35   | 2      | 34     | 34    | 2       | 33      | A    | 1           | 186894.091   | 0.011                      | 305.9596  |
| 42   | 3      | 39     | 42    | 2       | 40      | A    | 0           | 186908.032   | 0.093                      | 238.4752  |
| 42   | 4      | 39     | 42    | 3       | 40      | A    | 0           | 186908.032   | 0.093                      | 238.4752  |
| 35   | 1      | 34     | 34    | 1       | 33      | E    | 1           | 186935.247   | -0.012                     | 305.6222  |
| 35   | 1      | 34     | 34    | 2       | 33      | E    | 1           | 186935.247   | -0.012                     | 305.6222  |
| 35   | 2      | 34     | 34    | 1       | 33      | E    | 1           | 186935.247   | -0.012                     | 305.6222  |
| 35   | 2      | 34     | 34    | 2       | 33      | E    | 1           | 186935.247   | -0.012                     | 305.6222  |
| 29   | 17     | 13     | 29    | 16      | 14      | E    | 0           | 186948.744   | 0.006                      | 205.5491  |
| 55   | 11     | 45     | 55    | 10      | 46      | E    | 1           | 186953.526   | 0.305                      | 533.8445  |
| 31   | 5      | 26     | 30    | 5       | 25      | E    | 1           | 186961.766   | 0.024                      | 298.6882  |
| 31   | 5      | 26     | 30    | 5       | 25      | E    | 0           | 186968.037   | -0.112                     | 170.3607  |
| 31   | 5      | 26     | 30    | 5       | 25      | A    | 0           | 186973.488   | -0.015                     | 170.3521  |
| 35   | 1      | 34     | 34    | 1       | 33      | E    | 0           | 186974.825   | 0.016                      | 177.3044  |
| 35   | 2      | 34     | 34    | 2       | 33      | E    | 0           | 186974.825   | 0.016                      | 177.3044  |
| 35   | 1      | 34     | 34    | 1       | 33      | A    | 0           | 186976.049   | -0.025                     | 177.2939  |
| 35   | 1      | 34     | 34    | 2       | 33      | A    | 0           | 186976.049   | -0.025                     | 177.2939  |
| 35   | 2      | 34     | 34    | 1       | 33      | A    | 0           | 186976.049   | -0.025                     | 177.2939  |
| 35   | 2      | 34     | 34    | 2       | 33      | A    | 0           | 186976.049   | -0.025                     | 177.2939  |
| 29   | 17     | 13     | 29    | 16      | 14      | A    | 0           | 186981.702   | -0.023                     | 205.5587  |
| 29   | 17     | 12     | 29    | 16      | 13      | A    | 0           | 186981.702   | -0.023                     | 205.5587  |
| 49   | 18     | 31     | 49    | 17      | 32      | E    | 0           | 186993.003   | -0.025                     | 376.5549  |
| 49   | 18     | 32     | 49    | 17      | 33      | E    | 0           | 187004.958   | 0.031                      | 376.5430  |
| 49   | 7      | 42     | 49    | 6       | 43      | E    | 1           | 187024.898   | 0.060                      | 452.6847  |
| 49   | 8      | 42     | 49    | 7       | 43      | E    | 1           | 187026.138   | -0.017                     | 452.6847  |
| 49   | 18     | 31     | 49    | 17      | 32      | A    | 0           | 187028.924   | 0.005                      | 376.5521  |
| 49   | 18     | 32     | 49    | 17      | 33      | A    | 0           | 187059.192   | -0.059                     | 376.5510  |
| 31   | 6      | 26     | 30    | 5       | 25      | A    | 1           | 187098.696   | 0.043                      | 298.9624  |
| 36   | 0      | 36     | 35    | 0       | 35      | A    | 1           | 187109.829   | 0.052                      | 306.6257  |
| 36   | 0      | 36     | 35    | 1       | 35      | A    | 1           | 187109.829   | 0.052                      | 306.6257  |
| 36   | 1      | 36     | 35    | 0       | 35      | A    | 1           | 187109.829   | 0.052                      | 306.6257  |
| 36   | 1      | 36     | 35    | 1       | 35      | A    | 1           | 187109.829   | 0.052                      | 306.6257  |
| 36   | 0      | 36     | 35    | 0       | 35      | E    | 1           | 187121.481   | -0.010                     | 306.2567  |
| 36   | 1      | 36     | 35    | 1       | 35      | E    | 1           | 187121.481   | -0.010                     | 306.2567  |
| 36   | 0      | 36     | 35    | 1       | 35      | A    | 0           | 187167.471   | -0.204                     | 177.9345  |
| 36   | 1      | 36     | 35    | 0       | 35      | A    | 0           | 187167.471   | -0.204                     | 177.9345  |
| 36   | 1      | 36     | 35    | 1       | 35      | A    | 0           | 187167.471   | -0.204                     | 177.9345  |
| 36   | 0      | 36     | 35    | 0       | 35      | E    | 0           | 187167.471   | 0.161                      | 177.9459  |
| 36   | 1      | 36     | 35    | 1       | 35      | E    | 0           | 187167.471   | 0.161                      | 177.9459  |
| 28   | 17     | 11     | 28    | 16      | 12      | E    | 0           | 187171.127   | -0.033                     | 199.5673  |
| 28   | 17     | 12     | 28    | 16      | 13      | A    | 0           | 187218.311   | -0.028                     | 199.5637  |
| 28   | 17     | 11     | 28    | 16      | 12      | A    | 0           | 187218.311   | -0.028                     | 199.5637  |
| 70   | 16     | 54     | 70    | 15      | 55      | E    | 0           | 187227.888   | 0.010                      | 638.6845  |
| 30   | 13     | 17     | 29    | 13      | 16      | E    | 0           | 187287.548   | 0.041                      | 189.2387  |
| 30   | 13     | 18     | 29    | 13      | 17      | E    | 0           | 187289.218   | 0.003                      | 189.2253  |
| 31   | 6      | 26     | 30    | 5       | 25      | E    | 0           | 187297.692   | -0.024                     | 170.3607  |
| 31   | 6      | 26     | 30    | 5       | 25      | A    | 0           | 187304.379   | 0.063                      | 170.3521  |
| 27   | 17     | 10     | 27    | 16      | 11      | E    | 0           | 187383.559   | -0.040                     | 193.7834  |



| $J'$ | $K'_a$ | $K'_c$ | $J''$ | $K''_a$ | $K''_c$ | Sym. | $v_{tCH_3}$ | $\nu_{Obs.}$ | $\nu_{Obs.} - \nu_{Calc.}$ | $E_{low}$ |
|------|--------|--------|-------|---------|---------|------|-------------|--------------|----------------------------|-----------|
| 27   | 17     | 11     | 27    | 16      | 12      | E    | 0           | 187398.278   | 0.087                      | 193.7702  |
| 51   | 8      | 43     | 51    | 7       | 44      | E    | 1           | 187418.223   | 0.156                      | 478.7003  |
| 27   | 17     | 11     | 27    | 16      | 12      | A    | 0           | 187430.720   | -0.014                     | 193.7798  |
| 27   | 17     | 10     | 27    | 16      | 11      | A    | 0           | 187430.720   | -0.014                     | 193.7798  |
| 51   | 8      | 43     | 51    | 7       | 44      | A    | 0           | 187528.373   | -0.004                     | 350.3939  |
| 51   | 9      | 43     | 51    | 8       | 44      | A    | 0           | 187533.369   | -0.028                     | 350.3939  |
| 53   | 9      | 44     | 53    | 8       | 45      | E    | 0           | 187539.589   | -0.044                     | 377.4613  |
| 53   | 9      | 44     | 53    | 8       | 45      | A    | 0           | 187548.740   | -0.066                     | 377.4578  |
| 53   | 10     | 44     | 53    | 9       | 45      | E    | 0           | 187558.185   | -0.033                     | 377.4614  |
| 53   | 10     | 44     | 53    | 9       | 45      | A    | 0           | 187567.421   | -0.074                     | 377.4579  |
| 26   | 17     | 9      | 26    | 16      | 10      | E    | 0           | 187573.630   | -0.043                     | 188.2102  |
| 26   | 17     | 10     | 26    | 16      | 11      | E    | 0           | 187588.402   | -0.011                     | 188.1970  |
| 26   | 17     | 10     | 26    | 16      | 11      | A    | 0           | 187620.805   | 0.037                      | 188.2066  |
| 26   | 17     | 9      | 26    | 16      | 10      | A    | 0           | 187620.805   | 0.037                      | 188.2066  |
| 58   | 19     | 39     | 58    | 18      | 40      | A    | 0           | 187627.153   | -0.059                     | 485.5017  |
| 11   | 11     | 1      | 10    | 10      | 1       | E    | 0           | 187663.356   | 0.020                      | 97.6043   |
| 11   | 11     | 0      | 10    | 10      | 0       | E    | 0           | 187680.062   | -0.040                     | 97.6169   |
| 11   | 11     | 1      | 10    | 10      | 0       | A    | 0           | 187710.257   | 0.014                      | 97.6057   |
| 11   | 11     | 0      | 10    | 10      | 1       | A    | 0           | 187710.257   | 0.014                      | 97.6057   |
| 25   | 17     | 8      | 25    | 16      | 9       | E    | 0           | 187743.097   | -0.031                     | 182.8472  |
| 25   | 17     | 9      | 25    | 16      | 10      | E    | 0           | 187758.033   | 0.034                      | 182.8339  |
| 62   | 13     | 49     | 62    | 12      | 50      | A    | 0           | 187779.734   | -0.116                     | 508.6771  |
| 62   | 13     | 49     | 62    | 12      | 50      | E    | 0           | 187787.309   | -0.051                     | 508.6782  |
| 25   | 17     | 9      | 25    | 16      | 10      | A    | 0           | 187790.177   | -0.007                     | 182.8436  |
| 25   | 17     | 8      | 25    | 16      | 9       | A    | 0           | 187790.177   | -0.007                     | 182.8436  |
| 24   | 17     | 7      | 24    | 16      | 8       | E    | 0           | 187893.550   | -0.059                     | 177.6939  |
| 24   | 17     | 8      | 24    | 16      | 9       | E    | 0           | 187908.605   | 0.009                      | 177.6806  |
| 30   | 12     | 19     | 29    | 12      | 18      | A    | 0           | 187938.545   | 0.064                      | 184.6032  |
| 24   | 17     | 8      | 24    | 16      | 9       | A    | 0           | 187940.646   | 0.015                      | 177.6904  |
| 24   | 17     | 7      | 24    | 16      | 8       | A    | 0           | 187940.646   | 0.015                      | 177.6904  |
| 30   | 12     | 18     | 29    | 12      | 17      | E    | 0           | 187942.391   | 0.043                      | 184.6125  |
| 23   | 17     | 6      | 23    | 16      | 7       | E    | 0           | 188026.710   | 0.041                      | 172.7499  |
| 23   | 17     | 7      | 23    | 16      | 8       | E    | 0           | 188041.807   | 0.050                      | 172.7367  |
| 23   | 17     | 7      | 23    | 16      | 8       | A    | 0           | 188073.658   | 0.001                      | 172.7464  |
| 23   | 17     | 6      | 23    | 16      | 7       | A    | 0           | 188073.658   | 0.001                      | 172.7464  |
| 22   | 17     | 5      | 22    | 16      | 6       | E    | 0           | 188143.679   | -0.092                     | 168.0149  |
| 48   | 18     | 30     | 48    | 17      | 31      | E    | 0           | 188149.696   | -0.055                     | 366.2352  |
| 22   | 17     | 6      | 22    | 16      | 7       | E    | 0           | 188158.978   | 0.030                      | 168.0017  |
| 48   | 18     | 31     | 48    | 17      | 32      | E    | 0           | 188161.394   | -0.094                     | 366.2232  |
| 22   | 17     | 6      | 22    | 16      | 7       | A    | 0           | 188190.745   | 0.016                      | 168.0114  |
| 22   | 17     | 5      | 22    | 16      | 6       | A    | 0           | 188190.745   | 0.016                      | 168.0114  |
| 48   | 18     | 30     | 48    | 17      | 31      | A    | 0           | 188192.244   | 0.058                      | 366.2322  |
| 48   | 18     | 31     | 48    | 17      | 32      | A    | 0           | 188207.782   | -0.056                     | 366.2317  |
| 21   | 17     | 4      | 21    | 16      | 5       | E    | 0           | 188246.241   | -0.058                     | 163.4885  |
| 21   | 17     | 5      | 21    | 16      | 6       | E    | 0           | 188261.705   | 0.152                      | 163.4752  |
| 21   | 17     | 5      | 21    | 16      | 6       | A    | 0           | 188293.224   | -0.004                     | 163.4850  |
| 21   | 17     | 4      | 21    | 16      | 5       | A    | 0           | 188293.224   | -0.004                     | 163.4850  |
| 20   | 17     | 3      | 20    | 16      | 4       | E    | 0           | 188335.507   | -0.050                     | 159.1702  |
| 58   | 19     | 40     | 58    | 18      | 41      | A    | 0           | 188366.691   | -0.024                     | 485.4735  |
| 20   | 17     | 4      | 20    | 16      | 5       | A    | 0           | 188382.447   | -0.012                     | 159.1668  |
| 20   | 17     | 3      | 20    | 16      | 4       | A    | 0           | 188382.447   | -0.012                     | 159.1668  |
| 66   | 20     | 47     | 66    | 19      | 48      | E    | 0           | 188391.247   | -0.003                     | 598.2459  |
| 19   | 17     | 3      | 19    | 16      | 4       | A    | 0           | 188459.666   | 0.008                      | 155.0564  |
| 19   | 17     | 2      | 19    | 16      | 3       | A    | 0           | 188459.666   | 0.008                      | 155.0564  |
| 18   | 17     | 1      | 18    | 16      | 2       | E    | 0           | 188479.081   | -0.048                     | 151.1569  |
| 18   | 17     | 2      | 18    | 16      | 3       | E    | 0           | 188494.565   | 0.012                      | 151.1437  |
| 13   | 10     | 4      | 12    | 9       | 4       | E    | 0           | 188515.787   | -0.131                     | 98.7133   |
| 18   | 17     | 2      | 18    | 16      | 3       | A    | 0           | 188525.990   | 0.007                      | 151.1535  |
| 18   | 17     | 1      | 18    | 16      | 2       | A    | 0           | 188525.990   | 0.007                      | 151.1535  |
| 13   | 10     | 3      | 12    | 9       | 3       | E    | 0           | 188537.771   | -0.038                     | 98.7252   |
| 13   | 10     | 3      | 12    | 9       | 4       | A    | 0           | 188563.450   | 0.008                      | 98.7132   |
| 31   | 6      | 25     | 30    | 7       | 24      | E    | 1           | 188632.978   | -0.218                     | 301.9818  |
| 44   | 4      | 40     | 44    | 3       | 41      | E    | 0           | 188654.897   | 0.014                      | 260.7603  |
| 44   | 5      | 40     | 44    | 4       | 41      | E    | 0           | 188654.897   | 0.010                      | 260.7603  |
| 19   | 6      | 13     | 18    | 5       | 14      | E    | 0           | 188668.219   | 0.030                      | 107.5722  |
| 19   | 6      | 13     | 18    | 5       | 14      | A    | 0           | 188676.008   | 0.075                      | 107.5622  |
| 44   | 4      | 40     | 44    | 3       | 41      | A    | 0           | 188680.006   | 0.070                      | 260.7523  |
| 44   | 5      | 40     | 44    | 4       | 41      | A    | 0           | 188680.006   | 0.065                      | 260.7523  |
| 31   | 6      | 25     | 30    | 7       | 24      | A    | 0           | 188733.361   | -0.007                     | 173.6479  |
| 31   | 6      | 25     | 30    | 7       | 24      | E    | 0           | 188738.593   | 0.017                      | 173.6561  |
| 62   | 14     | 49     | 62    | 13      | 50      | A    | 0           | 188767.520   | -0.116                     | 508.6819  |
| 62   | 14     | 49     | 62    | 13      | 50      | E    | 0           | 188770.689   | -0.051                     | 508.6829  |
| 30   | 11     | 20     | 29    | 11      | 19      | A    | 0           | 188800.825   | 0.004                      | 180.4021  |
| 30   | 11     | 20     | 29    | 11      | 19      | E    | 0           | 188830.668   | 0.010                      | 180.4010  |
| 30   | 11     | 19     | 29    | 11      | 18      | E    | 0           | 188844.963   | 0.021                      | 180.4136  |
| 30   | 11     | 19     | 29    | 11      | 18      | A    | 0           | 188869.415   | -0.022                     | 180.4043  |
| 30   | 6      | 24     | 29    | 6       | 23      | E    | 0           | 189004.143   | -0.022                     | 167.1923  |
| 30   | 6      | 24     | 29    | 6       | 23      | A    | 0           | 189013.613   | 0.021                      | 167.1833  |
| 30   | 6      | 24     | 29    | 6       | 23      | E    | 1           | 189037.067   | 0.061                      | 295.5125  |
| 47   | 18     | 29     | 47    | 17      | 30      | E    | 0           | 189213.002   | -0.019                     | 356.1402  |
| 47   | 18     | 30     | 47    | 17      | 31      | E    | 0           | 189225.267   | -0.080                     | 356.1282  |
| 47   | 18     | 29     | 47    | 17      | 30      | A    | 0           | 189259.022   | 0.049                      | 356.1373  |
| 47   | 18     | 30     | 47    | 17      | 31      | A    | 0           | 189266.782   | -0.100                     | 356.1370  |
| 15   | 9      | 7      | 14    | 8       | 7       | E    | 0           | 189272.668   | -0.030                     | 101.0595  |
| 15   | 9      | 6      | 14    | 8       | 6       | E    | 0           | 189299.682   | -0.031                     | 101.0704  |
| 15   | 9      | 7      | 14    | 8       | 6       | A    | 0           | 189320.394   | 0.257                      | 101.0577  |
| 15   | 9      | 6      | 14    | 8       | 7       | A    | 0           | 189320.394   | -0.235                     | 101.0577  |
| 32   | 7      | 25     | 31    | 8       | 24      | A    | 0           | 189430.283   | 0.003                      | 183.1928  |
| 32   | 7      | 25     | 31    | 8       | 24      | E    | 0           | 189457.872   | -0.006                     | 183.2005  |
| 20   | 7      | 14     | 19    | 6       | 13      | E    | 0           | 189511.766   | -0.050                     | 113.8655  |
| 20   | 7      | 14     | 19    | 6       | 13      | A    | 0           | 189560.630   | 0.059                      | 113.8557  |
| 59   | 18     | 41     | 58    | 19      | 40      | A    | 0           | 189597.434   | -0.079                     | 491.7568  |
| 17   | 8      | 10     | 16    | 7       | 9       | A    | 0           | 189653.009   | 0.002                      | 104.6838  |
| 17   | 8      | 10     | 16    | 7       | 10      | E    | 0           | 189660.387   | -0.033                     | 104.6857  |
| 17   | 8      | 9      | 16    | 7       | 9       | E    | 0           | 189680.749   | -0.033                     | 104.6958  |
| 30   | 8      | 23     | 29    | 8       | 22      | E    | 0           | 189707.301   | -0.026                     | 170.3492  |
| 30   | 8      | 23     | 29    | 8       | 22      | A    | 0           | 189708.390   | 0.039                      | 170.3414  |
| 57   | 19     | 38     | 57    | 18      | 39      | A    | 0           | 189742.264   | -0.032                     | 473.1634  |
| 17   | 8      | 9      | 16    | 7       | 10      | A    | 0           | 189751.224   | 0.040                      | 104.6809  |
| 57   | 19     | 38     | 57    | 18      | 39      | E    | 0           | 189775.006   | -0.164                     | 473.1626  |
| 41   | 2      | 39     | 41    | 1       | 40      | E    | 0           | 189785.263   | 0.055                      | 224.5546  |
| 41   | 3      | 39     | 41    | 2       | 40      | E    | 0           | 189785.263   | 0.055                      | 224.5546  |
| 41   | 2      | 39     | 41    | 1       | 40      | A    | 0           | 189816.487   | 0.101                      | 224.5444  |
| 41   | 3      | 39     | 41    | 2       | 40      | A    | 0           | 189816.487   | 0.101                      | 224.5444  |
| 30   | 10     | 21     | 29    | 10      | 20      | A    | 0           | 189851.800   | -0.020                     | 176.6445  |
| 30   | 10     | 21     | 29    | 10      | 20      | E    | 0           | 189872.853   | -0.011                     | 176.6487  |
| 60   | 12     | 48     | 60    | 11      | 49      | E    | 1           | 189878.832   | 0.641                      | 605.2828  |
| 41   | 2      | 39     | 41    | 1       | 40      | E    | 1           | 189938.739   | -0.087                     | 352.8621  |
| 41   | 3      | 39     | 41    | 2       | 40      | E    | 1           | 189938.739   | -0.087                     | 352.8621  |
| 67   | 16     | 52     | 67    | 15      | 53      | A    | 0           | 189989.069   | -0.119                     | 588.9301  |
| 57   | 19     | 39     | 57    | 18      | 40      | E    | 0           | 190041.175   | 0.019                      | 473.1430  |
| 46   | 5      | 41     | 46    | 4       | 42      | E    | 0           | 190149.249   | 0.009                      | 284.1118  |
| 46   | 6      | 41     | 46    | 5       | 42      | E    | 0           | 190149.249   | -0.017                     | 284.1118  |
| 46   | 5      | 41     | 46    | 4       | 42      | A    | 0           | 190171.414   | -0.040                     | 284.1049  |
| 46   | 6      | 41     | 46    | 5       | 42      | A    | 0           | 190171.414   | -0.066                     | 284.1049  |
| 46   | 5      | 41     | 46    | 4       | 42      | E    | 1           | 190183.416   | -0.021                     | 412.4231  |



| $J'$ | $K'_a$ | $K'_c$ | $J''$ | $K''_a$ | $K''_c$ | Sym. | $v_{tCH_3}$ | $\nu_{Obs.}$ | $\nu_{Obs.} - \nu_{Calc.}$ | $E_{low}$ |
|------|--------|--------|-------|---------|---------|------|-------------|--------------|----------------------------|-----------|
| 46   | 6      | 41     | 46    | 5       | 42      | E    | 1           | 190183.416   | -0.049                     | 412.4231  |
| 46   | 18     | 28     | 46    | 17      | 29      | E    | 0           | 190191.433   | -0.042                     | 346.2688  |
| 46   | 18     | 29     | 46    | 17      | 30      | E    | 0           | 190204.526   | -0.009                     | 346.2567  |
| 46   | 18     | 28     | 46    | 17      | 29      | A    | 0           | 190239.267   | 0.065                      | 346.2659  |
| 46   | 18     | 29     | 46    | 17      | 30      | A    | 0           | 190243.025   | -0.090                     | 346.2657  |
| 64   | 20     | 44     | 64    | 19      | 45      | E    | 0           | 190275.455   | -0.063                     | 570.3132  |
| 64   | 20     | 44     | 64    | 19      | 45      | A    | 0           | 190296.886   | -0.067                     | 570.3149  |
| 30   | 10     | 20     | 29    | 10      | 19      | E    | 0           | 190439.540   | 0.009                      | 176.6749  |
| 30   | 10     | 20     | 29    | 10      | 19      | A    | 0           | 190453.500   | 0.028                      | 176.6680  |
| 65   | 20     | 46     | 65    | 19      | 47      | E    | 0           | 190502.580   | -0.013                     | 584.1149  |
| 65   | 20     | 46     | 65    | 19      | 47      | A    | 0           | 190574.090   | -0.026                     | 584.1171  |
| 30   | 9      | 22     | 29    | 9       | 21      | A    | 0           | 190581.219   | 0.024                      | 173.3265  |
| 30   | 9      | 22     | 29    | 9       | 21      | E    | 0           | 190584.682   | 0.011                      | 173.3331  |
| 65   | 14     | 51     | 65    | 13      | 52      | A    | 0           | 190841.593   | -0.100                     | 554.7551  |
| 29   | 8      | 21     | 28    | 8       | 20      | A    | 0           | 190949.372   | 0.013                      | 164.7762  |
| 29   | 8      | 21     | 28    | 8       | 20      | E    | 0           | 190955.226   | -0.019                     | 164.7849  |
| 27   | 7      | 21     | 26    | 6       | 20      | A    | 0           | 190965.125   | 0.073                      | 149.1685  |
| 28   | 7      | 22     | 27    | 6       | 21      | E    | 0           | 190985.072   | -0.043                     | 155.0288  |
| 34   | 8      | 26     | 33    | 9       | 25      | A    | 0           | 191036.519   | -0.018                     | 200.0297  |
| 34   | 8      | 26     | 33    | 9       | 25      | E    | 0           | 191088.036   | 0.027                      | 200.0366  |
| 45   | 18     | 27     | 45    | 17      | 28      | E    | 0           | 191092.400   | -0.053                     | 336.6198  |
| 45   | 18     | 28     | 45    | 17      | 29      | E    | 0           | 191106.256   | 0.024                      | 336.6076  |
| 45   | 18     | 28     | 45    | 17      | 29      | A    | 0           | 191142.763   | -0.143                     | 336.6168  |
| 29   | 7      | 22     | 28    | 7       | 21      | E    | 0           | 191319.649   | 0.075                      | 162.9673  |
| 29   | 7      | 22     | 28    | 7       | 21      | A    | 0           | 191323.602   | -0.032                     | 162.9577  |
| 48   | 6      | 42     | 48    | 5       | 43      | E    | 1           | 191336.735   | 0.047                      | 436.8406  |
| 48   | 7      | 42     | 48    | 6       | 43      | E    | 1           | 191336.735   | -0.105                     | 436.8406  |
| 48   | 6      | 42     | 48    | 5       | 43      | E    | 0           | 191344.160   | 0.066                      | 308.5314  |
| 48   | 7      | 42     | 48    | 6       | 43      | E    | 0           | 191344.160   | -0.074                     | 308.5314  |
| 48   | 6      | 42     | 48    | 5       | 43      | A    | 0           | 191363.433   | 0.066                      | 308.5255  |
| 48   | 7      | 42     | 48    | 6       | 43      | A    | 0           | 191363.433   | -0.075                     | 308.5255  |
| 31   | 21     | 11     | 30    | 21      | 10      | A    | 0           | 191366.119   | -0.044                     | 246.8131  |
| 31   | 21     | 10     | 30    | 21      | 9       | A    | 0           | 191366.119   | -0.044                     | 246.8131  |
| 31   | 21     | 10     | 30    | 21      | 9       | E    | 0           | 191366.778   | -0.044                     | 246.8088  |
| 32   | 5      | 27     | 31    | 6       | 26      | A    | 1           | 191489.425   | -0.017                     | 305.2033  |
| 26   | 7      | 20     | 25    | 6       | 19      | E    | 0           | 191498.448   | -0.080                     | 143.4969  |
| 31   | 20     | 11     | 30    | 20      | 10      | A    | 0           | 191516.482   | -0.107                     | 239.0260  |
| 31   | 20     | 12     | 30    | 20      | 11      | A    | 0           | 191516.482   | -0.107                     | 239.0260  |
| 31   | 20     | 11     | 30    | 20      | 10      | E    | 0           | 191517.399   | 0.085                      | 239.0232  |
| 26   | 7      | 20     | 25    | 6       | 19      | A    | 0           | 191542.634   | 0.012                      | 143.4869  |
| 31   | 7      | 25     | 30    | 7       | 24      | A    | 1           | 191584.544   | 0.069                      | 302.2465  |
| 33   | 4      | 29     | 32    | 5       | 28      | A    | 1           | 191587.500   | 0.028                      | 307.6468  |
| 33   | 5      | 29     | 32    | 5       | 28      | A    | 1           | 191593.934   | 0.029                      | 307.6468  |
| 33   | 4      | 29     | 32    | 4       | 28      | A    | 1           | 191599.624   | -0.034                     | 307.6464  |
| 33   | 5      | 29     | 32    | 4       | 28      | A    | 1           | 191606.209   | 0.097                      | 307.6464  |
| 32   | 5      | 27     | 31    | 6       | 26      | E    | 1           | 191619.333   | -0.022                     | 304.9360  |
| 56   | 19     | 37     | 56    | 18      | 38      | A    | 0           | 191620.766   | -0.062                     | 461.0621  |
| 56   | 19     | 37     | 56    | 18      | 38      | E    | 0           | 191640.619   | -0.025                     | 461.0619  |
| 32   | 5      | 27     | 31    | 6       | 26      | E    | 0           | 191643.504   | -0.005                     | 176.6082  |
| 32   | 5      | 27     | 31    | 6       | 26      | A    | 1           | 191647.334   | -0.013                     | 176.5999  |
| 32   | 6      | 27     | 31    | 6       | 26      | A    | 1           | 191664.384   | -0.026                     | 305.2033  |
| 34   | 3      | 31     | 33    | 3       | 30      | A    | 1           | 191666.234   | -0.082                     | 309.6037  |
| 34   | 3      | 31     | 33    | 4       | 30      | A    | 1           | 191666.234   | 0.218                      | 309.6037  |
| 34   | 4      | 31     | 33    | 3       | 30      | A    | 1           | 191666.234   | -0.233                     | 309.6037  |
| 34   | 4      | 31     | 33    | 4       | 30      | A    | 1           | 191666.234   | 0.067                      | 309.6037  |
| 31   | 19     | 13     | 30    | 19      | 12      | A    | 0           | 191691.083   | -0.093                     | 231.6260  |
| 31   | 19     | 12     | 30    | 19      | 11      | A    | 0           | 191691.083   | -0.093                     | 231.6260  |
| 31   | 19     | 13     | 30    | 19      | 12      | E    | 0           | 191692.075   | 0.040                      | 231.6136  |
| 58   | 11     | 47     | 58    | 10      | 48      | E    | 0           | 191701.791   | 0.043                      | 446.3690  |
| 58   | 11     | 47     | 58    | 10      | 48      | A    | 0           | 191704.211   | -0.116                     | 446.3670  |
| 33   | 4      | 29     | 32    | 5       | 28      | E    | 1           | 191708.799   | -0.022                     | 307.3717  |
| 33   | 5      | 29     | 32    | 5       | 28      | E    | 1           | 191716.169   | -0.021                     | 307.3717  |
| 33   | 4      | 29     | 32    | 4       | 28      | E    | 1           | 191722.738   | 0.090                      | 307.3713  |
| 33   | 5      | 29     | 32    | 4       | 28      | E    | 1           | 191729.986   | -0.030                     | 307.3713  |
| 33   | 4      | 29     | 32    | 5       | 28      | E    | 0           | 191732.513   | 0.020                      | 179.0439  |
| 33   | 4      | 29     | 32    | 5       | 28      | A    | 0           | 191736.220   | 0.004                      | 179.0354  |
| 33   | 5      | 29     | 32    | 5       | 28      | E    | 0           | 191739.478   | -0.015                     | 179.0439  |
| 33   | 5      | 29     | 32    | 5       | 28      | A    | 0           | 191743.218   | -0.032                     | 179.0354  |
| 33   | 4      | 29     | 32    | 4       | 28      | E    | 0           | 191745.651   | -0.017                     | 179.0435  |
| 33   | 4      | 29     | 32    | 4       | 28      | A    | 0           | 191749.344   | -0.107                     | 179.0349  |
| 56   | 19     | 38     | 56    | 18      | 39      | E    | 0           | 191750.456   | 0.163                      | 461.0477  |
| 33   | 5      | 29     | 32    | 4       | 28      | E    | 0           | 191752.663   | -0.006                     | 179.0435  |
| 31   | 7      | 25     | 30    | 7       | 24      | E    | 0           | 191754.172   | -0.022                     | 173.6561  |
| 33   | 5      | 29     | 32    | 4       | 28      | A    | 0           | 191756.474   | -0.011                     | 179.0349  |
| 31   | 7      | 25     | 30    | 7       | 24      | A    | 0           | 191758.523   | -0.008                     | 173.6479  |
| 34   | 3      | 31     | 33    | 3       | 30      | E    | 1           | 191761.018   | -0.124                     | 309.3143  |
| 34   | 3      | 31     | 33    | 4       | 30      | E    | 1           | 191761.018   | 0.224                      | 309.3143  |
| 34   | 4      | 31     | 33    | 3       | 30      | E    | 1           | 191761.018   | -0.300                     | 309.3143  |
| 34   | 4      | 31     | 33    | 4       | 30      | E    | 1           | 191761.018   | 0.048                      | 309.3143  |
| 34   | 3      | 31     | 33    | 3       | 30      | E    | 0           | 191790.677   | -0.091                     | 180.9886  |
| 34   | 3      | 31     | 33    | 4       | 30      | E    | 0           | 191790.677   | 0.237                      | 180.9886  |
| 34   | 4      | 31     | 33    | 3       | 30      | E    | 0           | 191790.677   | -0.257                     | 180.9886  |
| 34   | 4      | 31     | 33    | 4       | 30      | E    | 0           | 191790.677   | 0.072                      | 180.9886  |
| 34   | 3      | 31     | 33    | 4       | 30      | A    | 0           | 191793.587   | 0.237                      | 180.9796  |
| 34   | 4      | 31     | 33    | 4       | 30      | A    | 0           | 191793.587   | 0.070                      | 180.9796  |
| 34   | 3      | 31     | 33    | 3       | 30      | A    | 0           | 191793.588   | -0.093                     | 180.9796  |
| 34   | 4      | 31     | 33    | 3       | 30      | A    | 0           | 191793.588   | -0.260                     | 180.9796  |
| 32   | 5      | 27     | 31    | 5       | 26      | A    | 1           | 191798.272   | 0.068                      | 305.1930  |
| 32   | 6      | 27     | 31    | 6       | 26      | E    | 1           | 191814.849   | 0.001                      | 304.9360  |
| 35   | 2      | 33     | 34    | 2       | 32      | A    | 1           | 191823.575   | -0.010                     | 311.1113  |
| 35   | 2      | 33     | 34    | 3       | 32      | A    | 1           | 191823.575   | -0.006                     | 311.1113  |
| 35   | 3      | 33     | 34    | 2       | 32      | A    | 1           | 191823.575   | -0.013                     | 311.1113  |
| 35   | 3      | 33     | 34    | 3       | 32      | A    | 1           | 191823.575   | -0.008                     | 311.1113  |
| 32   | 6      | 27     | 31    | 6       | 26      | A    | 0           | 191835.527   | 0.045                      | 176.5999  |
| 43   | 3      | 40     | 43    | 2       | 41      | E    | 0           | 191841.525   | 0.011                      | 246.2545  |
| 43   | 4      | 40     | 43    | 3       | 41      | E    | 0           | 191841.525   | 0.010                      | 246.2545  |
| 56   | 19     | 38     | 56    | 18      | 39      | A    | 0           | 191864.791   | -0.010                     | 461.0530  |
| 43   | 3      | 40     | 43    | 2       | 41      | A    | 0           | 191870.114   | 0.091                      | 246.2455  |
| 43   | 4      | 40     | 43    | 3       | 41      | A    | 0           | 191870.114   | 0.091                      | 246.2455  |
| 35   | 2      | 33     | 34    | 2       | 32      | E    | 1           | 191891.901   | -0.022                     | 310.8015  |
| 35   | 2      | 33     | 34    | 3       | 32      | E    | 1           | 191891.901   | -0.016                     | 310.8015  |
| 35   | 3      | 33     | 34    | 2       | 32      | E    | 1           | 191891.901   | -0.024                     | 310.8015  |
| 35   | 3      | 33     | 34    | 3       | 32      | E    | 1           | 191891.901   | -0.019                     | 310.8015  |
| 31   | 18     | 13     | 30    | 18      | 12      | A    | 0           | 191895.785   | -0.014                     | 224.6146  |
| 31   | 18     | 14     | 30    | 18      | 13      | A    | 0           | 191895.785   | -0.014                     | 224.6146  |
| 31   | 18     | 14     | 30    | 18      | 13      | E    | 0           | 191896.812   | -0.045                     | 224.6030  |
| 21   | 7      | 15     | 20    | 6       | 14      | E    | 0           | 191913.474   | -0.061                     | 118.2051  |
| 44   | 18     | 26     | 44    | 17      | 27      | E    | 0           | 191922.338   | -0.020                     | 327.1922  |
| 35   | 2      | 33     | 34    | 2       | 32      | E    | 0           | 191927.181   | -0.016                     | 182.4796  |
| 35   | 3      | 33     | 34    | 3       | 32      | E    | 0           | 191927.181   | -0.014                     | 182.4796  |
| 35   | 2      | 33     | 34    | 2       | 32      | A    | 0           | 191929.287   | -0.008                     | 182.4700  |
| 35   | 2      | 33     | 34    | 3       | 32      | A    | 0           | 191929.287   | -0.003                     | 182.4700  |
| 35   | 3      | 33     | 34    | 2       | 32      | A    | 0           | 191929.287   | -0.011                     | 182.4700  |
| 35   | 3      | 33     | 34    | 3       | 32      | A    | 0           | 191929.287   | -0.006                     | 182.4700  |
| 44   | 18     | 27     | 44    | 17      | 28      | E    | 0           | 191936.804   | -0.002                     | 327.1799  |
| 29   | 7      | 23     | 28    | 6       | 22      | A    | 0           | 191939.512   | -0.003                     | 161.0265  |



| $J'$ | $K'_a$ | $K'_c$ | $J''$ | $K''_a$ | $K''_c$ | Sym. | $v_{tCH_3}$ | $\nu_{Obs.}$ | $\nu_{Obs.} - \nu_{Calc.}$ | $E_{low}$ |
|------|--------|--------|-------|---------|---------|------|-------------|--------------|----------------------------|-----------|
| 43   | 3      | 40     | 43    | 2       | 41      | E    | 1           | 191957.247   | -0.092                     | 374.5640  |
| 43   | 4      | 40     | 43    | 3       | 41      | E    | 1           | 191957.247   | -0.092                     | 374.5640  |
| 21   | 7      | 15     | 20    | 6       | 14      | A    | 0           | 191959.556   | -0.019                     | 118.1952  |
| 32   | 5      | 27     | 31    | 5       | 26      | E    | 1           | 191962.058   | -0.079                     | 304.9246  |
| 44   | 18     | 26     | 44    | 17      | 27      | A    | 0           | 191971.345   | 0.086                      | 327.1893  |
| 44   | 18     | 27     | 44    | 17      | 28      | A    | 0           | 191972.021   | -0.134                     | 327.1893  |
| 32   | 6      | 27     | 31    | 5       | 26      | A    | 1           | 191973.141   | -0.030                     | 305.1930  |
| 32   | 5      | 27     | 31    | 5       | 26      | A    | 0           | 191978.121   | -0.038                     | 176.5889  |
| 36   | 1      | 35     | 35    | 1       | 34      | A    | 1           | 192021.546   | -0.001                     | 312.1937  |
| 36   | 1      | 35     | 35    | 2       | 34      | A    | 1           | 192021.546   | -0.001                     | 312.1937  |
| 36   | 2      | 35     | 35    | 1       | 34      | A    | 1           | 192021.546   | -0.001                     | 312.1937  |
| 36   | 2      | 35     | 35    | 2       | 34      | A    | 1           | 192021.546   | -0.001                     | 312.1937  |
| 36   | 1      | 35     | 35    | 1       | 34      | E    | 1           | 192062.558   | -0.027                     | 311.8577  |
| 36   | 1      | 35     | 35    | 2       | 34      | E    | 1           | 192062.558   | -0.027                     | 311.8577  |
| 36   | 2      | 35     | 35    | 1       | 34      | E    | 1           | 192062.558   | -0.027                     | 311.8577  |
| 36   | 2      | 35     | 35    | 2       | 34      | E    | 1           | 192062.558   | -0.027                     | 311.8577  |
| 36   | 1      | 35     | 35    | 1       | 34      | E    | 0           | 192103.557   | 0.010                      | 183.5412  |
| 36   | 2      | 35     | 35    | 2       | 34      | E    | 0           | 192103.557   | 0.010                      | 183.5412  |
| 36   | 1      | 35     | 35    | 1       | 34      | A    | 0           | 192104.783   | -0.025                     | 183.5308  |
| 36   | 1      | 35     | 35    | 2       | 34      | A    | 0           | 192104.783   | -0.024                     | 183.5308  |
| 36   | 2      | 35     | 35    | 1       | 34      | A    | 0           | 192104.783   | -0.025                     | 183.5308  |
| 36   | 2      | 35     | 35    | 2       | 34      | A    | 0           | 192104.783   | -0.024                     | 183.5308  |
| 31   | 17     | 15     | 30    | 17      | 14      | A    | 0           | 192138.227   | -0.078                     | 217.9935  |
| 31   | 17     | 14     | 30    | 17      | 13      | A    | 0           | 192138.227   | -0.078                     | 217.9935  |
| 32   | 6      | 27     | 31    | 5       | 26      | E    | 1           | 192157.619   | -0.011                     | 304.9246  |
| 32   | 6      | 27     | 31    | 5       | 26      | E    | 0           | 192160.449   | -0.016                     | 176.5973  |
| 32   | 6      | 27     | 31    | 5       | 26      | A    | 0           | 192166.259   | -0.035                     | 176.5889  |
| 37   | 0      | 37     | 36    | 0       | 36      | A    | 1           | 192237.746   | 0.059                      | 312.8670  |
| 37   | 0      | 37     | 36    | 1       | 36      | A    | 1           | 192237.746   | 0.059                      | 312.8670  |
| 37   | 1      | 37     | 36    | 0       | 36      | A    | 1           | 192237.746   | 0.059                      | 312.8670  |
| 37   | 1      | 37     | 36    | 1       | 36      | A    | 1           | 192237.746   | 0.059                      | 312.8670  |
| 37   | 0      | 37     | 36    | 0       | 36      | E    | 1           | 192249.284   | -0.020                     | 312.4984  |
| 37   | 1      | 37     | 36    | 1       | 36      | E    | 1           | 192249.284   | -0.020                     | 312.4984  |
| 37   | 0      | 37     | 36    | 0       | 36      | A    | 0           | 192296.650   | -0.195                     | 184.1777  |
| 37   | 0      | 37     | 36    | 1       | 36      | A    | 0           | 192296.650   | -0.195                     | 184.1777  |
| 37   | 1      | 37     | 36    | 0       | 36      | A    | 0           | 192296.650   | -0.195                     | 184.1777  |
| 37   | 1      | 37     | 36    | 1       | 36      | A    | 0           | 192296.650   | -0.195                     | 184.1777  |
| 37   | 0      | 37     | 36    | 0       | 36      | E    | 0           | 192296.650   | 0.168                      | 184.1892  |
| 37   | 1      | 37     | 36    | 1       | 36      | E    | 0           | 192296.650   | 0.168                      | 184.1892  |
| 25   | 7      | 19     | 24    | 6       | 18      | E    | 0           | 192375.057   | -0.046                     | 138.0010  |
| 25   | 7      | 19     | 24    | 6       | 18      | A    | 0           | 192421.474   | -0.010                     | 137.9908  |
| 31   | 16     | 15     | 30    | 16      | 14      | A    | 0           | 192429.370   | -0.048                     | 211.7653  |
| 31   | 16     | 16     | 30    | 16      | 15      | A    | 0           | 192429.370   | -0.048                     | 211.7653  |
| 31   | 16     | 15     | 30    | 16      | 14      | E    | 0           | 192430.453   | 0.071                      | 211.7689  |
| 31   | 16     | 16     | 30    | 16      | 15      | E    | 0           | 192431.055   | 0.057                      | 211.7557  |
| 65   | 15     | 51     | 65    | 14      | 52      | A    | 0           | 192462.911   | -0.115                     | 554.7635  |
| 65   | 15     | 51     | 65    | 14      | 52      | E    | 0           | 192468.207   | -0.050                     | 554.7640  |
| 64   | 20     | 45     | 64    | 19      | 46      | E    | 0           | 192628.768   | 0.040                      | 570.2179  |
| 52   | 8      | 44     | 52    | 7       | 45      | E    | 1           | 192639.489   | 0.100                      | 488.8438  |
| 52   | 9      | 44     | 52    | 8       | 45      | E    | 1           | 192642.527   | 0.167                      | 488.8438  |
| 43   | 18     | 25     | 43    | 17      | 26      | E    | 0           | 192686.876   | 0.026                      | 317.9849  |
| 43   | 18     | 26     | 43    | 17      | 27      | E    | 0           | 192701.910   | -0.002                     | 317.9726  |
| 64   | 20     | 45     | 64    | 19      | 46      | A    | 0           | 192714.033   | -0.037                     | 570.2204  |
| 54   | 9      | 45     | 54    | 8       | 46      | E    | 1           | 192719.930   | 0.225                      | 516.4130  |
| 54   | 10     | 45     | 54    | 9       | 46      | E    | 1           | 192731.189   | 0.171                      | 516.4131  |
| 52   | 8      | 44     | 52    | 7       | 45      | A    | 0           | 192747.974   | -0.047                     | 360.5394  |
| 52   | 9      | 44     | 52    | 8       | 45      | A    | 0           | 192750.742   | -0.038                     | 360.5394  |
| 31   | 15     | 17     | 30    | 15      | 16      | A    | 0           | 192784.183   | -0.052                     | 205.9331  |
| 31   | 15     | 16     | 30    | 15      | 15      | A    | 0           | 192784.183   | -0.054                     | 205.9331  |
| 31   | 15     | 16     | 30    | 15      | 15      | E    | 0           | 192785.250   | 0.007                      | 205.9383  |
| 31   | 15     | 17     | 30    | 15      | 16      | E    | 0           | 192786.208   | 0.040                      | 205.9248  |
| 54   | 9      | 45     | 54    | 8       | 46      | E    | 0           | 192862.557   | -0.022                     | 388.1198  |
| 24   | 7      | 18     | 23    | 6       | 17      | E    | 0           | 193187.322   | -0.050                     | 132.7081  |
| 31   | 14     | 18     | 30    | 14      | 17      | A    | 0           | 193224.790   | -0.002                     | 200.5017  |
| 31   | 14     | 17     | 30    | 14      | 16      | E    | 0           | 193225.895   | 0.041                      | 200.5083  |
| 31   | 14     | 18     | 30    | 14      | 17      | E    | 0           | 193227.116   | -0.081                     | 200.4948  |
| 22   | 7      | 16     | 21    | 6       | 15      | E    | 0           | 193232.419   | -0.085                     | 122.7970  |
| 24   | 7      | 18     | 23    | 6       | 17      | A    | 0           | 193234.573   | -0.007                     | 132.6979  |
| 31   | 6      | 25     | 30    | 6       | 24      | A    | 1           | 193270.383   | -0.046                     | 302.0950  |
| 22   | 7      | 16     | 21    | 6       | 15      | A    | 0           | 193278.643   | 0.008                      | 122.7869  |
| 55   | 19     | 36     | 55    | 18      | 37      | E    | 0           | 193307.764   | -0.142                     | 449.1954  |
| 55   | 19     | 36     | 55    | 18      | 37      | A    | 0           | 193308.625   | 0.040                      | 449.1948  |
| 55   | 19     | 37     | 55    | 18      | 38      | E    | 0           | 193352.888   | -0.033                     | 449.1833  |
| 42   | 18     | 24     | 42    | 17      | 25      | E    | 0           | 193390.926   | -0.055                     | 308.9972  |
| 42   | 18     | 25     | 42    | 17      | 26      | E    | 0           | 193406.604   | 0.000                      | 308.9848  |
| 42   | 18     | 24     | 42    | 17      | 25      | A    | 0           | 193440.047   | 0.087                      | 308.9945  |
| 55   | 19     | 37     | 55    | 18      | 38      | A    | 0           | 193444.697   | -0.025                     | 449.1898  |
| 31   | 6      | 25     | 30    | 6       | 24      | E    | 0           | 193515.260   | 0.003                      | 173.4968  |
| 31   | 6      | 25     | 30    | 6       | 24      | A    | 0           | 193523.991   | -0.018                     | 173.4881  |
| 31   | 6      | 25     | 30    | 6       | 24      | E    | 1           | 193541.796   | 0.001                      | 301.8181  |
| 23   | 7      | 17     | 22    | 6       | 16      | E    | 0           | 193578.331   | -0.017                     | 127.6351  |
| 23   | 7      | 17     | 22    | 6       | 16      | A    | 0           | 193625.360   | 0.099                      | 127.6250  |
| 45   | 4      | 41     | 45    | 3       | 42      | E    | 0           | 193641.429   | 0.016                      | 269.0379  |
| 45   | 5      | 41     | 45    | 4       | 42      | E    | 0           | 193641.429   | 0.014                      | 269.0379  |
| 45   | 4      | 41     | 45    | 3       | 42      | A    | 0           | 193667.187   | 0.055                      | 269.0300  |
| 45   | 5      | 41     | 45    | 4       | 42      | A    | 0           | 193667.187   | 0.053                      | 269.0300  |
| 45   | 4      | 41     | 45    | 3       | 42      | E    | 1           | 193717.887   | -0.085                     | 397.3482  |
| 45   | 5      | 41     | 45    | 4       | 42      | E    | 1           | 193717.887   | -0.087                     | 397.3482  |
| 30   | 7      | 24     | 29    | 6       | 23      | E    | 0           | 193780.813   | -0.031                     | 167.1923  |
| 31   | 13     | 19     | 30    | 13      | 18      | A    | 0           | 193784.555   | -0.083                     | 195.4779  |
| 30   | 7      | 24     | 29    | 6       | 23      | A    | 0           | 193804.221   | -0.012                     | 167.1833  |
| 12   | 11     | 2      | 11    | 10      | 2       | E    | 0           | 193811.577   | 0.016                      | 99.8626   |
| 12   | 11     | 1      | 11    | 10      | 1       | E    | 0           | 193828.308   | -0.042                     | 99.8752   |
| 12   | 11     | 2      | 11    | 10      | 1       | A    | 0           | 193858.490   | 0.018                      | 99.8641   |
| 12   | 11     | 1      | 11    | 10      | 2       | A    | 0           | 193858.490   | 0.018                      | 99.8641   |
| 30   | 9      | 21     | 29    | 9       | 20      | A    | 0           | 193948.133   | -0.017                     | 173.5056  |
| 30   | 9      | 21     | 29    | 9       | 20      | E    | 0           | 193954.254   | 0.004                      | 173.5130  |
| 41   | 18     | 23     | 41    | 17      | 24      | E    | 0           | 194039.247   | -0.043                     | 300.2281  |
| 41   | 18     | 24     | 41    | 17      | 25      | E    | 0           | 194055.426   | 0.001                      | 300.2157  |
| 41   | 18     | 23     | 41    | 17      | 24      | A    | 0           | 194088.223   | 0.024                      | 300.2255  |
| 69   | 21     | 48     | 69    | 20      | 49      | E    | 0           | 194117.110   | -0.058                     | 648.3021  |
| 69   | 21     | 48     | 69    | 20      | 49      | A    | 0           | 194164.052   | -0.069                     | 648.3038  |
| 31   | 12     | 20     | 30    | 12      | 19      | A    | 0           | 194515.066   | 0.005                      | 190.8721  |
| 31   | 12     | 19     | 30    | 12      | 18      | E    | 0           | 194522.426   | 0.001                      | 190.8816  |
| 31   | 12     | 20     | 30    | 12      | 19      | E    | 0           | 194524.854   | 0.151                      | 190.8686  |
| 31   | 12     | 19     | 30    | 12      | 18      | A    | 0           | 194527.224   | -0.020                     | 190.8725  |
| 63   | 14     | 50     | 63    | 13      | 51      | A    | 0           | 194591.315   | -0.107                     | 521.5836  |
| 63   | 14     | 50     | 63    | 13      | 51      | E    | 0           | 194594.031   | -0.057                     | 521.5844  |
| 40   | 18     | 22     | 40    | 17      | 23      | E    | 0           | 194635.850   | -0.031                     | 291.6768  |
| 14   | 10     | 5      | 13    | 9       | 5       | E    | 0           | 194649.105   | -0.026                     | 101.3904  |
| 40   | 18     | 23     | 40    | 17      | 24      | E    | 0           | 194652.482   | -0.001                     | 291.6644  |
| 14   | 10     | 4      | 13    | 9       | 4       | E    | 0           | 194671.161   | 0.066                      | 101.4022  |
| 40   | 18     | 22     | 40    | 17      | 23      | A    | 0           | 194684.693   | -0.005                     | 291.6743  |
| 14   | 10     | 4      | 13    | 9       | 5       | A    | 0           | 194696.710   | 0.020                      | 101.3902  |
| 42   | 2      | 40     | 42    | 1       | 41      | E    | 0           | 194728.609   | 0.038                      | 231.9889  |
| 42   | 3      | 40     | 42    | 2       | 41      | E    | 0           | 194728.609   | 0.038                      | 231.9889  |



| $J'$ | $K'_a$ | $K'_c$ | $J''$ | $K''_a$ | $K''_c$ | Sym. | $v_{tCH_3}$ | $\nu_{Obs.}$ | $\nu_{Obs.} - \nu_{Calc.}$ | $E_{low}$ |
|------|--------|--------|-------|---------|---------|------|-------------|--------------|----------------------------|-----------|
| 42   | 2      | 40     | 42    | 1       | 41      | A    | 0           | 194760.633   | 0.082                      | 231.9787  |
| 42   | 3      | 40     | 42    | 2       | 41      | A    | 0           | 194760.633   | 0.082                      | 231.9787  |
| 63   | 20     | 44     | 63    | 19      | 45      | A    | 0           | 194817.286   | -0.033                     | 556.5586  |
| 54   | 19     | 35     | 54    | 18      | 36      | E    | 0           | 194818.876   | -0.026                     | 437.5602  |
| 54   | 19     | 35     | 54    | 18      | 36      | A    | 0           | 194838.445   | -0.015                     | 437.5591  |
| 54   | 19     | 36     | 54    | 18      | 37      | E    | 0           | 194842.010   | -0.034                     | 437.5488  |
| 42   | 2      | 40     | 42    | 1       | 41      | E    | 1           | 194885.805   | -0.037                     | 360.2947  |
| 42   | 3      | 40     | 42    | 2       | 41      | E    | 1           | 194885.805   | -0.037                     | 360.2947  |
| 54   | 19     | 36     | 54    | 18      | 37      | A    | 0           | 194912.951   | -0.041                     | 437.5563  |
| 32   | 6      | 26     | 31    | 7       | 25      | E    | 1           | 195052.350   | -0.092                     | 308.3777  |
| 32   | 6      | 26     | 31    | 7       | 25      | A    | 1           | 195058.837   | 0.025                      | 308.6370  |
| 32   | 6      | 26     | 31    | 7       | 25      | A    | 0           | 195129.187   | -0.009                     | 180.0443  |
| 32   | 6      | 26     | 31    | 7       | 25      | E    | 0           | 195130.788   | 0.001                      | 180.0524  |
| 47   | 5      | 42     | 47    | 4       | 43      | E    | 0           | 195170.308   | 0.025                      | 292.8974  |
| 47   | 6      | 42     | 47    | 5       | 43      | E    | 0           | 195170.308   | 0.011                      | 292.8974  |
| 39   | 18     | 21     | 39    | 17      | 22      | E    | 0           | 195184.434   | -0.051                     | 283.3427  |
| 47   | 5      | 42     | 47    | 4       | 43      | A    | 0           | 195193.149   | 0.037                      | 292.8906  |
| 47   | 6      | 42     | 47    | 5       | 43      | A    | 0           | 195193.149   | 0.024                      | 292.8906  |
| 39   | 18     | 22     | 39    | 17      | 23      | E    | 0           | 195201.498   | -0.015                     | 283.3302  |
| 47   | 5      | 42     | 47    | 4       | 43      | E    | 1           | 195206.177   | -0.060                     | 421.2071  |
| 47   | 6      | 42     | 47    | 5       | 43      | E    | 1           | 195206.177   | -0.074                     | 421.2071  |
| 39   | 18     | 21     | 39    | 17      | 22      | A    | 0           | 195233.199   | -0.006                     | 283.3402  |
| 16   | 9      | 8      | 15    | 8       | 8       | E    | 0           | 195347.844   | 0.001                      | 104.1640  |
| 16   | 9      | 7      | 15    | 8       | 7       | E    | 0           | 195375.038   | -0.039                     | 104.1748  |
| 31   | 11     | 21     | 30    | 11      | 20      | A    | 0           | 195472.202   | -0.005                     | 186.6998  |
| 18   | 8      | 11     | 17    | 7       | 10      | A    | 0           | 195476.466   | 0.076                      | 108.2353  |
| 31   | 11     | 21     | 30    | 11      | 20      | E    | 0           | 195511.585   | 0.013                      | 186.6997  |
| 18   | 8      | 10     | 17    | 7       | 10      | E    | 0           | 195545.318   | -0.026                     | 108.2462  |
| 31   | 8      | 24     | 30    | 8       | 23      | E    | 0           | 195564.717   | -0.006                     | 176.6771  |
| 31   | 8      | 24     | 30    | 8       | 23      | A    | 0           | 195566.670   | -0.007                     | 176.6694  |
| 31   | 11     | 20     | 30    | 11      | 19      | E    | 0           | 195570.516   | -0.033                     | 186.7128  |
| 18   | 8      | 11     | 17    | 7       | 11      | E    | 0           | 195573.500   | 0.006                      | 108.2346  |
| 31   | 11     | 20     | 30    | 11      | 19      | A    | 0           | 195603.851   | -0.026                     | 186.7043  |
| 38   | 18     | 20     | 38    | 17      | 21      | E    | 0           | 195688.467   | -0.042                     | 275.2249  |
| 38   | 18     | 20     | 38    | 17      | 21      | A    | 0           | 195737.120   | -0.015                     | 275.2225  |
| 62   | 20     | 42     | 62    | 19      | 43      | A    | 0           | 195959.745   | -0.042                     | 543.1656  |
| 44   | 4      | 41     | 44    | 2       | 42      | A    | 1           | 195967.970   | 0.023                      | 382.7910  |
| 44   | 4      | 41     | 44    | 3       | 42      | A    | 1           | 195967.970   | 0.023                      | 382.7910  |
| 37   | 18     | 19     | 37    | 17      | 20      | E    | 0           | 196151.007   | -0.075                     | 267.3227  |
| 37   | 18     | 20     | 37    | 17      | 21      | E    | 0           | 196168.794   | -0.062                     | 267.3102  |
| 37   | 18     | 19     | 37    | 17      | 20      | A    | 0           | 196199.696   | -0.011                     | 267.3204  |
| 53   | 19     | 34     | 53    | 18      | 35      | E    | 0           | 196201.487   | -0.026                     | 426.1543  |
| 53   | 19     | 35     | 53    | 18      | 36      | E    | 0           | 196218.525   | -0.050                     | 426.1429  |
| 53   | 19     | 34     | 53    | 18      | 35      | A    | 0           | 196234.376   | -0.015                     | 426.1527  |
| 53   | 19     | 35     | 53    | 18      | 36      | A    | 0           | 196274.428   | 0.004                      | 426.1512  |
| 49   | 6      | 43     | 49    | 5       | 44      | E    | 1           | 196404.602   | 0.053                      | 446.1333  |
| 49   | 7      | 43     | 49    | 6       | 44      | E    | 1           | 196404.602   | -0.026                     | 446.1333  |
| 49   | 6      | 43     | 49    | 5       | 44      | E    | 0           | 196410.508   | 0.025                      | 317.8258  |
| 49   | 7      | 43     | 49    | 6       | 44      | E    | 0           | 196410.508   | -0.048                     | 317.8258  |
| 31   | 7      | 25     | 30    | 6       | 24      | E    | 0           | 196530.875   | 0.001                      | 173.4968  |
| 31   | 7      | 25     | 30    | 6       | 24      | A    | 0           | 196549.171   | -0.001                     | 173.4881  |
| 31   | 10     | 22     | 30    | 10      | 21      | A    | 0           | 196558.100   | -0.008                     | 182.9773  |
| 31   | 10     | 22     | 30    | 10      | 21      | E    | 0           | 196570.804   | 0.017                      | 182.9822  |
| 36   | 18     | 18     | 36    | 17      | 19      | E    | 0           | 196575.055   | -0.032                     | 259.6356  |
| 36   | 18     | 19     | 36    | 17      | 20      | E    | 0           | 196593.217   | 0.033                      | 259.6230  |
| 36   | 18     | 18     | 36    | 17      | 19      | A    | 0           | 196623.503   | -0.032                     | 259.6333  |
| 36   | 18     | 19     | 36    | 17      | 20      | A    | 0           | 196623.503   | -0.033                     | 259.6333  |
| 31   | 7      | 25     | 30    | 6       | 24      | E    | 1           | 196653.237   | 0.108                      | 301.8181  |
| 33   | 5      | 28     | 32    | 6       | 27      | A    | 1           | 196662.619   | 0.010                      | 311.5965  |
| 34   | 4      | 30     | 33    | 5       | 29      | A    | 1           | 196699.949   | 0.009                      | 314.0377  |
| 34   | 5      | 30     | 33    | 5       | 29      | A    | 1           | 196703.375   | 0.045                      | 314.0377  |
| 34   | 4      | 30     | 33    | 4       | 29      | A    | 1           | 196706.221   | -0.173                     | 314.0375  |
| 34   | 5      | 30     | 33    | 4       | 29      | A    | 1           | 196709.810   | 0.026                      | 314.0375  |
| 30   | 7      | 23     | 29    | 7       | 22      | E    | 0           | 196759.718   | -0.067                     | 169.3491  |
| 30   | 7      | 23     | 29    | 7       | 22      | A    | 0           | 196766.654   | -0.003                     | 169.3396  |
| 35   | 3      | 32     | 34    | 3       | 31      | A    | 1           | 196787.541   | -0.056                     | 315.9970  |
| 35   | 3      | 32     | 34    | 4       | 31      | A    | 1           | 196787.541   | 0.095                      | 315.9970  |
| 35   | 4      | 32     | 34    | 3       | 31      | A    | 1           | 196787.541   | -0.131                     | 315.9970  |
| 35   | 4      | 32     | 34    | 4       | 31      | A    | 1           | 196787.541   | 0.020                      | 315.9970  |
| 33   | 5      | 28     | 32    | 6       | 27      | E    | 1           | 196799.900   | -0.142                     | 311.3343  |
| 32   | 7      | 26     | 31    | 7       | 25      | A    | 1           | 196811.105   | 0.064                      | 308.6370  |
| 34   | 4      | 30     | 33    | 5       | 29      | E    | 1           | 196820.477   | -0.034                     | 313.7667  |
| 33   | 5      | 28     | 32    | 6       | 27      | E    | 0           | 196822.900   | 0.000                      | 183.0070  |
| 33   | 5      | 28     | 32    | 6       | 27      | A    | 0           | 196827.015   | -0.023                     | 182.9989  |
| 34   | 5      | 30     | 33    | 4       | 29      | E    | 1           | 196831.762   | -0.012                     | 313.7664  |
| 33   | 5      | 28     | 32    | 5       | 27      | A    | 1           | 196837.605   | 0.028                      | 311.5907  |
| 34   | 4      | 30     | 33    | 5       | 29      | E    | 0           | 196845.912   | -0.011                     | 185.4397  |
| 34   | 4      | 30     | 33    | 5       | 29      | A    | 0           | 196849.615   | -0.012                     | 185.4312  |
| 34   | 5      | 30     | 33    | 5       | 29      | E    | 0           | 196849.615   | 0.000                      | 185.4397  |
| 34   | 4      | 30     | 33    | 4       | 29      | A    | 0           | 196856.614   | -0.046                     | 185.4310  |
| 34   | 5      | 30     | 33    | 4       | 29      | E    | 0           | 196856.614   | -0.002                     | 185.4395  |
| 34   | 5      | 30     | 33    | 4       | 29      | A    | 0           | 196860.329   | -0.041                     | 185.4310  |
| 35   | 3      | 32     | 34    | 3       | 31      | E    | 1           | 196881.718   | -0.069                     | 315.7108  |
| 35   | 3      | 32     | 34    | 4       | 31      | E    | 1           | 196881.718   | 0.107                      | 315.7108  |
| 35   | 4      | 32     | 34    | 3       | 31      | E    | 1           | 196881.718   | -0.157                     | 315.7108  |
| 35   | 4      | 32     | 34    | 4       | 31      | E    | 1           | 196881.718   | 0.018                      | 315.7108  |
| 33   | 6      | 28     | 32    | 6       | 27      | E    | 1           | 196910.065   | -0.086                     | 311.3343  |
| 35   | 3      | 32     | 34    | 3       | 31      | E    | 0           | 196913.018   | -0.054                     | 187.3860  |
| 35   | 3      | 32     | 34    | 4       | 31      | E    | 0           | 196913.018   | 0.112                      | 187.3860  |
| 35   | 4      | 32     | 34    | 3       | 31      | E    | 0           | 196913.018   | -0.137                     | 187.3860  |
| 35   | 4      | 32     | 34    | 4       | 31      | E    | 0           | 196913.018   | 0.029                      | 187.3860  |
| 35   | 3      | 32     | 34    | 3       | 31      | A    | 0           | 196915.908   | -0.057                     | 187.3771  |
| 35   | 3      | 32     | 34    | 4       | 31      | A    | 0           | 196915.908   | 0.109                      | 187.3771  |
| 35   | 4      | 32     | 34    | 3       | 31      | A    | 0           | 196915.908   | -0.141                     | 187.3771  |
| 35   | 4      | 32     | 34    | 4       | 31      | A    | 0           | 196915.908   | 0.026                      | 187.3771  |
| 32   | 28     | 4      | 31    | 28      | 3       | E    | 0           | 196915.908   | 0.114                      | 318.4469  |
| 44   | 3      | 41     | 44    | 2       | 42      | E    | 1           | 196919.344   | -0.108                     | 382.5036  |
| 44   | 4      | 41     | 44    | 3       | 42      | E    | 1           | 196919.344   | -0.108                     | 382.5036  |
| 33   | 6      | 28     | 32    | 6       | 27      | E    | 0           | 196928.060   | -0.072                     | 183.0070  |
| 33   | 6      | 28     | 32    | 6       | 27      | A    | 0           | 196932.713   | 0.004                      | 182.9989  |
| 33   | 6      | 28     | 32    | 5       | 27      | A    | 1           | 196935.549   | 0.045                      | 311.5907  |
| 36   | 2      | 34     | 35    | 2       | 33      | A    | 1           | 196949.530   | 0.029                      | 317.5098  |
| 36   | 2      | 34     | 35    | 3       | 33      | A    | 1           | 196949.530   | 0.031                      | 317.5098  |
| 36   | 3      | 34     | 35    | 2       | 33      | A    | 1           | 196949.530   | 0.028                      | 317.5098  |
| 36   | 3      | 34     | 35    | 3       | 33      | A    | 1           | 196949.530   | 0.030                      | 317.5098  |
| 35   | 18     | 17     | 35    | 17      | 18      | E    | 0           | 196963.190   | -0.000                     | 252.1629  |
| 32   | 7      | 26     | 31    | 7       | 25      | E    | 1           | 196975.805   | 0.012                      | 308.3777  |
| 35   | 18     | 18     | 35    | 17      | 19      | E    | 0           | 196981.548   | -0.033                     | 252.1503  |
| 32   | 7      | 26     | 31    | 7       | 25      | A    | 0           | 196992.892   | 0.009                      | 180.0443  |
| 33   | 5      | 28     | 32    | 5       | 27      | E    | 1           | 196995.411   | -0.124                     | 311.3277  |
| 33   | 5      | 28     | 32    | 5       | 27      | E    | 0           | 197010.353   | 0.064                      | 183.0008  |
| 35   | 18     | 17     | 35    | 17      | 18      | A    | 0           | 197011.544   | -0.013                     | 252.1607  |
| 35   | 18     | 18     | 35    | 17      | 19      | A    | 0           | 197011.544   | -0.013                     | 252.1607  |
| 33   | 5      | 28     | 32    | 5       | 27      | A    | 0           | 197015.149   | -0.023                     | 182.9926  |
| 36   | 2      | 34     | 35    | 2       | 33      | E    | 1           | 197017.518   | -0.024                     | 317.2024  |
| 36   | 2      | 34     | 35    | 3       | 33      | E    | 1           | 197017.518   | -0.021                     | 317.2024  |



| $J'$ | $K'_a$ | $K'_c$ | $J''$ | $K''_a$ | $K''_c$ | Sym. | $v_{tCH_3}$ | $\nu_{Obs.}$ | $\nu_{Obs.} - \nu_{Calc.}$ | $E_{low}$ |
|------|--------|--------|-------|---------|---------|------|-------------|--------------|----------------------------|-----------|
| 36   | 3      | 34     | 35    | 2       | 33      | E    | 1           | 197017.518   | -0.025                     | 317.2024  |
| 36   | 3      | 34     | 35    | 3       | 33      | E    | 1           | 197017.518   | -0.023                     | 317.2024  |
| 31   | 9      | 23     | 30    | 9       | 22      | A    | 0           | 197037.562   | -0.046                     | 179.6836  |
| 31   | 9      | 23     | 30    | 9       | 22      | E    | 0           | 197039.780   | 0.044                      | 179.6904  |
| 36   | 2      | 34     | 35    | 2       | 33      | E    | 0           | 197054.307   | -0.013                     | 188.8816  |
| 36   | 3      | 34     | 35    | 3       | 33      | E    | 0           | 197054.307   | -0.012                     | 188.8816  |
| 36   | 2      | 34     | 35    | 2       | 33      | A    | 0           | 197056.356   | -0.052                     | 188.8720  |
| 36   | 2      | 34     | 35    | 3       | 33      | A    | 0           | 197056.356   | -0.050                     | 188.8720  |
| 36   | 3      | 34     | 35    | 2       | 33      | A    | 0           | 197056.356   | -0.054                     | 188.8720  |
| 36   | 3      | 34     | 35    | 3       | 33      | A    | 0           | 197056.356   | -0.051                     | 188.8720  |
| 33   | 6      | 28     | 32    | 5       | 27      | E    | 1           | 197105.602   | -0.042                     | 311.3277  |
| 33   | 6      | 28     | 32    | 5       | 27      | E    | 0           | 197115.526   | 0.005                      | 183.0008  |
| 33   | 6      | 28     | 32    | 5       | 27      | A    | 0           | 197120.820   | -0.024                     | 182.9926  |
| 37   | 1      | 36     | 36    | 1       | 35      | A    | 1           | 197148.936   | 0.002                      | 318.5989  |
| 37   | 1      | 36     | 36    | 2       | 35      | A    | 1           | 197148.936   | 0.002                      | 318.5989  |
| 37   | 2      | 36     | 36    | 1       | 35      | A    | 1           | 197148.936   | 0.002                      | 318.5989  |
| 37   | 2      | 36     | 36    | 2       | 35      | A    | 1           | 197148.936   | 0.002                      | 318.5989  |
| 37   | 1      | 36     | 36    | 1       | 35      | E    | 1           | 197189.811   | -0.025                     | 318.2642  |
| 37   | 1      | 36     | 36    | 2       | 35      | E    | 1           | 197189.811   | -0.025                     | 318.2642  |
| 37   | 2      | 36     | 36    | 1       | 35      | E    | 1           | 197189.811   | -0.025                     | 318.2642  |
| 37   | 2      | 36     | 36    | 2       | 35      | E    | 1           | 197189.811   | -0.025                     | 318.2642  |
| 37   | 1      | 36     | 36    | 1       | 35      | E    | 0           | 197232.231   | 0.021                      | 189.9491  |
| 37   | 2      | 36     | 36    | 2       | 35      | E    | 0           | 197232.231   | 0.021                      | 189.9491  |
| 37   | 1      | 36     | 36    | 1       | 35      | A    | 0           | 197233.443   | -0.023                     | 189.9387  |
| 37   | 1      | 36     | 36    | 2       | 35      | A    | 0           | 197233.443   | -0.023                     | 189.9387  |
| 37   | 2      | 36     | 36    | 1       | 35      | A    | 0           | 197233.443   | -0.023                     | 189.9387  |
| 37   | 2      | 36     | 36    | 2       | 35      | A    | 0           | 197233.443   | -0.023                     | 189.9387  |
| 34   | 18     | 16     | 34    | 17      | 17      | E    | 0           | 197317.817   | -0.049                     | 244.9040  |
| 34   | 18     | 17     | 34    | 17      | 18      | E    | 0           | 197336.539   | 0.016                      | 244.8914  |
| 38   | 0      | 38     | 37    | 0       | 37      | A    | 1           | 197365.563   | 0.072                      | 319.2793  |
| 38   | 0      | 38     | 37    | 1       | 37      | A    | 1           | 197365.563   | 0.072                      | 319.2793  |
| 38   | 1      | 38     | 37    | 0       | 37      | A    | 1           | 197365.563   | 0.072                      | 319.2793  |
| 38   | 1      | 38     | 37    | 1       | 37      | A    | 1           | 197365.563   | 0.072                      | 319.2793  |
| 38   | 0      | 38     | 37    | 0       | 37      | E    | 1           | 197377.004   | -0.006                     | 318.9111  |
| 38   | 0      | 38     | 37    | 1       | 37      | E    | 1           | 197377.004   | -0.006                     | 318.9111  |
| 38   | 1      | 38     | 37    | 0       | 37      | E    | 1           | 197377.004   | -0.006                     | 318.9111  |
| 38   | 1      | 38     | 37    | 1       | 37      | E    | 1           | 197377.004   | -0.006                     | 318.9111  |
| 41   | 1      | 40     | 41    | 0       | 41      | A    | 0           | 197388.556   | 0.142                      | 217.9602  |
| 41   | 2      | 40     | 41    | 1       | 41      | A    | 0           | 197388.556   | 0.142                      | 217.9602  |
| 38   | 0      | 38     | 37    | 0       | 37      | A    | 0           | 197425.716   | -0.191                     | 190.5920  |
| 38   | 0      | 38     | 37    | 1       | 37      | A    | 0           | 197425.716   | -0.191                     | 190.5920  |
| 38   | 1      | 38     | 37    | 0       | 37      | A    | 0           | 197425.716   | -0.191                     | 190.5920  |
| 38   | 1      | 38     | 37    | 1       | 37      | A    | 0           | 197425.716   | -0.191                     | 190.5920  |
| 38   | 0      | 38     | 37    | 0       | 37      | E    | 0           | 197425.716   | 0.169                      | 190.6035  |
| 38   | 1      | 38     | 37    | 1       | 37      | E    | 0           | 197425.716   | 0.169                      | 190.6035  |
| 52   | 19     | 34     | 52    | 18      | 35      | A    | 0           | 197535.192   | -0.084                     | 414.9734  |
| 31   | 10     | 21     | 30    | 10      | 20      | A    | 0           | 197588.175   | -0.025                     | 183.0208  |
| 33   | 18     | 15     | 33    | 17      | 16      | E    | 0           | 197641.396   | -0.023                     | 237.8584  |
| 33   | 18     | 16     | 33    | 17      | 17      | E    | 0           | 197660.363   | 0.046                      | 237.8457  |
| 33   | 18     | 15     | 33    | 17      | 16      | A    | 0           | 197689.623   | -0.014                     | 237.8562  |
| 33   | 18     | 16     | 33    | 17      | 17      | A    | 0           | 197689.623   | -0.014                     | 237.8562  |
| 32   | 20     | 12     | 31    | 20      | 11      | A    | 0           | 197799.038   | -0.120                     | 245.4143  |
| 32   | 20     | 13     | 31    | 20      | 12      | A    | 0           | 197799.038   | -0.120                     | 245.4143  |
| 32   | 20     | 12     | 31    | 20      | 11      | E    | 0           | 197800.015   | 0.056                      | 245.4116  |
| 53   | 8      | 45     | 53    | 7       | 46      | E    | 1           | 197839.876   | 0.133                      | 499.1573  |
| 53   | 9      | 45     | 53    | 8       | 46      | E    | 1           | 197841.498   | 0.128                      | 499.1573  |
| 32   | 18     | 14     | 32    | 17      | 15      | E    | 0           | 197936.002   | 0.001                      | 231.0254  |
| 32   | 18     | 15     | 32    | 17      | 16      | E    | 0           | 197955.158   | 0.040                      | 231.0128  |
| 57   | 10     | 47     | 57    | 9       | 48      | E    | 0           | 197960.742   | -0.038                     | 428.0743  |
| 32   | 18     | 14     | 32    | 17      | 15      | A    | 0           | 197984.146   | -0.007                     | 231.0233  |
| 32   | 18     | 15     | 32    | 17      | 16      | A    | 0           | 197984.146   | -0.007                     | 231.0233  |
| 32   | 19     | 14     | 31    | 19      | 13      | A    | 0           | 197991.309   | -0.075                     | 238.0201  |
| 32   | 19     | 13     | 31    | 19      | 12      | A    | 0           | 197991.309   | -0.075                     | 238.0201  |
| 32   | 19     | 14     | 31    | 19      | 13      | E    | 0           | 197992.354   | 0.007                      | 238.0078  |
| 32   | 6      | 26     | 31    | 6       | 25      | E    | 0           | 198146.394   | -0.010                     | 179.9518  |
| 32   | 6      | 26     | 31    | 6       | 25      | A    | 0           | 198154.322   | -0.038                     | 179.9434  |
| 32   | 6      | 26     | 31    | 6       | 25      | E    | 1           | 198163.718   | -0.058                     | 308.2739  |
| 20   | 7      | 13     | 19    | 6       | 14      | E    | 0           | 198175.050   | -0.019                     | 113.6347  |
| 20   | 7      | 13     | 19    | 6       | 14      | A    | 0           | 198185.219   | -0.003                     | 113.6253  |
| 31   | 18     | 13     | 31    | 17      | 14      | E    | 0           | 198203.569   | -0.059                     | 224.4047  |
| 32   | 18     | 14     | 31    | 18      | 13      | A    | 0           | 198216.864   | -0.028                     | 231.0155  |
| 32   | 18     | 15     | 31    | 18      | 14      | A    | 0           | 198216.864   | -0.028                     | 231.0155  |
| 32   | 18     | 15     | 31    | 18      | 14      | E    | 0           | 198217.973   | -0.100                     | 231.0040  |
| 31   | 18     | 14     | 31    | 17      | 15      | E    | 0           | 198222.981   | 0.038                      | 224.3920  |
| 31   | 18     | 13     | 31    | 17      | 14      | A    | 0           | 198251.683   | -0.034                     | 224.4026  |
| 31   | 18     | 14     | 31    | 17      | 15      | A    | 0           | 198251.683   | -0.034                     | 224.4026  |
| 61   | 20     | 41     | 61    | 19      | 42      | A    | 0           | 198254.146   | -0.021                     | 529.9587  |
| 61   | 20     | 41     | 61    | 19      | 42      | E    | 0           | 198281.710   | -0.071                     | 529.9568  |
| 66   | 15     | 52     | 66    | 14      | 53      | A    | 0           | 198380.314   | -0.115                     | 568.3568  |
| 66   | 15     | 52     | 66    | 14      | 53      | E    | 0           | 198385.372   | -0.044                     | 568.3571  |
| 30   | 8      | 22     | 29    | 8       | 21      | A    | 0           | 198434.374   | -0.003                     | 171.1455  |
| 30   | 8      | 22     | 29    | 8       | 21      | E    | 0           | 198438.442   | -0.009                     | 171.1545  |
| 30   | 18     | 12     | 30    | 17      | 13      | E    | 0           | 198446.159   | -0.033                     | 217.9956  |
| 30   | 18     | 13     | 30    | 17      | 14      | E    | 0           | 198465.708   | 0.023                      | 217.9829  |
| 32   | 17     | 16     | 31    | 17      | 15      | A    | 0           | 198484.425   | -0.032                     | 224.4026  |
| 32   | 17     | 15     | 31    | 17      | 14      | A    | 0           | 198484.425   | -0.032                     | 224.4026  |
| 30   | 18     | 12     | 30    | 17      | 13      | A    | 0           | 198494.215   | -0.008                     | 217.9935  |
| 30   | 18     | 13     | 30    | 17      | 14      | A    | 0           | 198494.215   | -0.008                     | 217.9935  |
| 46   | 4      | 42     | 46    | 3       | 43      | E    | 0           | 198624.404   | 0.019                      | 277.4864  |
| 46   | 5      | 42     | 46    | 4       | 43      | E    | 0           | 198624.404   | 0.018                      | 277.4864  |
| 51   | 19     | 32     | 51    | 18      | 33      | E    | 0           | 198645.894   | -0.015                     | 404.0235  |
| 51   | 19     | 33     | 51    | 18      | 34      | E    | 0           | 198662.219   | -0.020                     | 404.0121  |
| 29   | 18     | 11     | 29    | 17      | 12      | E    | 0           | 198665.423   | -0.049                     | 211.7977  |
| 29   | 18     | 12     | 29    | 17      | 13      | E    | 0           | 198685.163   | 0.039                      | 211.7850  |
| 51   | 19     | 32     | 51    | 18      | 33      | A    | 0           | 198691.470   | 0.022                      | 404.0218  |
| 51   | 19     | 33     | 51    | 18      | 34      | A    | 0           | 198702.214   | -0.138                     | 404.0214  |
| 29   | 18     | 11     | 29    | 17      | 12      | A    | 0           | 198713.421   | -0.027                     | 211.7957  |
| 29   | 18     | 12     | 29    | 17      | 13      | A    | 0           | 198713.421   | -0.027                     | 211.7957  |
| 43   | 2      | 41     | 43    | 1       | 42      | A    | 1           | 198761.483   | -0.354                     | 368.2236  |
| 43   | 3      | 41     | 43    | 2       | 42      | A    | 1           | 198761.483   | -0.354                     | 368.2236  |
| 61   | 20     | 42     | 61    | 19      | 43      | A    | 0           | 198774.624   | -0.063                     | 529.9389  |
| 33   | 7      | 26     | 32    | 8       | 25      | A    | 0           | 198806.017   | 0.077                      | 189.9062  |
| 32   | 16     | 16     | 31    | 16      | 15      | A    | 0           | 198806.017   | -0.113                     | 218.1840  |
| 32   | 16     | 17     | 31    | 16      | 16      | A    | 0           | 198806.017   | -0.112                     | 218.1840  |
| 32   | 16     | 16     | 31    | 16      | 15      | E    | 0           | 198807.112   | -0.073                     | 218.1877  |
| 32   | 16     | 17     | 31    | 16      | 16      | E    | 0           | 198807.877   | -0.009                     | 218.1746  |
| 33   | 7      | 26     | 32    | 8       | 25      | E    | 0           | 198825.141   | -0.003                     | 189.9138  |
| 28   | 18     | 10     | 28    | 17      | 11      | E    | 0           | 198863.087   | -0.057                     | 205.8106  |
| 28   | 18     | 11     | 28    | 17      | 12      | E    | 0           | 198882.966   | 0.028                      | 205.7979  |
| 28   | 18     | 10     | 28    | 17      | 11      | A    | 0           | 198911.065   | -0.003                     | 205.8086  |
| 28   | 18     | 11     | 28    | 17      | 12      | A    | 0           | 198911.065   | -0.003                     | 205.8086  |
| 27   | 18     | 9      | 27    | 17      | 10      | E    | 0           | 199040.698   | -0.092                     | 200.0339  |
| 27   | 18     | 10     | 27    | 17      | 11      | E    | 0           | 199060.761   | 0.050                      | 200.0211  |
| 27   | 18     | 9      | 27    | 17      | 10      | A    | 0           | 199088.656   | -0.010                     | 200.0319  |
| 27   | 18     | 10     | 27    | 17      | 11      | A    | 0           | 199088.656   | -0.010                     | 200.0319  |
| 32   | 15     | 18     | 31    | 15      | 17      | A    | 0           | 199198.932   | -0.051                     | 212.3637  |



| $J'$ | $K'_a$ | $K'_c$ | $J''$ | $K''_a$ | $K''_c$ | Sym. | $v_{tCH_3}$ | $\nu_{Obs.}$ | $\nu_{Obs.} - \nu_{Calc.}$ | $E_{low}$ |
|------|--------|--------|-------|---------|---------|------|-------------|--------------|----------------------------|-----------|
| 32   | 15     | 18     | 31    | 15      | 17      | E    | 0           | 199201.137   | 0.004                      | 212.3555  |
| 26   | 18     | 9      | 26    | 17      | 10      | E    | 0           | 199219.993   | 0.055                      | 194.4542  |
| 26   | 18     | 8      | 26    | 17      | 9       | A    | 0           | 199247.708   | -0.028                     | 194.4650  |
| 26   | 18     | 9      | 26    | 17      | 10      | A    | 0           | 199247.708   | -0.028                     | 194.4650  |
| 25   | 18     | 7      | 25    | 17      | 8       | E    | 0           | 199341.840   | -0.061                     | 189.1096  |
| 25   | 18     | 8      | 25    | 17      | 9       | E    | 0           | 199362.063   | 0.029                      | 189.0969  |
| 25   | 18     | 7      | 25    | 17      | 8       | A    | 0           | 199389.673   | -0.019                     | 189.1076  |
| 25   | 18     | 8      | 25    | 17      | 9       | A    | 0           | 199389.673   | -0.019                     | 189.1076  |
| 24   | 18     | 6      | 24    | 17      | 7       | E    | 0           | 199468.078   | -0.042                     | 183.9613  |
| 24   | 18     | 7      | 24    | 17      | 8       | E    | 0           | 199488.397   | 0.056                      | 183.9486  |
| 24   | 18     | 6      | 24    | 17      | 7       | A    | 0           | 199515.842   | -0.029                     | 183.9594  |
| 24   | 18     | 7      | 24    | 17      | 8       | A    | 0           | 199515.842   | -0.029                     | 183.9594  |
| 23   | 18     | 5      | 23    | 17      | 6       | E    | 0           | 199579.752   | -0.077                     | 179.0218  |
| 23   | 18     | 6      | 23    | 17      | 7       | E    | 0           | 199600.185   | 0.057                      | 179.0091  |
| 23   | 18     | 5      | 23    | 17      | 6       | A    | 0           | 199627.539   | -0.006                     | 179.0199  |
| 23   | 18     | 6      | 23    | 17      | 7       | A    | 0           | 199627.539   | -0.006                     | 179.0199  |
| 43   | 2      | 41     | 43    | 1       | 42      | E    | 0           | 199671.004   | 0.037                      | 239.5942  |
| 43   | 3      | 41     | 43    | 2       | 42      | E    | 0           | 199671.004   | 0.037                      | 239.5942  |
| 22   | 18     | 4      | 22    | 17      | 5       | E    | 0           | 199678.162   | -0.068                     | 174.2907  |
| 32   | 14     | 18     | 31    | 14      | 17      | A    | 0           | 199688.215   | -0.062                     | 206.9470  |
| 32   | 14     | 19     | 31    | 14      | 18      | A    | 0           | 199688.215   | 0.059                      | 206.9470  |
| 32   | 14     | 18     | 31    | 14      | 17      | E    | 0           | 199689.365   | 0.016                      | 206.9537  |
| 32   | 14     | 19     | 31    | 14      | 18      | E    | 0           | 199690.904   | 0.042                      | 206.9402  |
| 22   | 18     | 5      | 22    | 17      | 6       | E    | 0           | 199698.653   | 0.059                      | 174.2780  |
| 43   | 2      | 41     | 43    | 1       | 42      | A    | 0           | 199703.856   | 0.110                      | 239.5841  |
| 43   | 3      | 41     | 43    | 2       | 42      | A    | 0           | 199703.856   | 0.110                      | 239.5841  |
| 22   | 18     | 4      | 22    | 17      | 5       | A    | 0           | 199725.883   | -0.028                     | 174.2888  |
| 22   | 18     | 5      | 22    | 17      | 6       | A    | 0           | 199725.883   | -0.028                     | 174.2888  |
| 50   | 19     | 31     | 50    | 18      | 32      | E    | 0           | 199728.981   | -0.046                     | 393.2961  |
| 50   | 19     | 32     | 50    | 18      | 33      | E    | 0           | 199746.041   | -0.009                     | 393.2846  |
| 21   | 18     | 3      | 21    | 17      | 4       | E    | 0           | 199764.401   | -0.059                     | 169.7677  |
| 50   | 19     | 31     | 50    | 18      | 32      | A    | 0           | 199776.929   | -0.004                     | 393.2944  |
| 50   | 19     | 32     | 50    | 18      | 33      | A    | 0           | 199782.337   | -0.122                     | 393.2942  |
| 21   | 18     | 3      | 21    | 17      | 4       | A    | 0           | 199812.097   | -0.014                     | 169.7658  |
| 21   | 18     | 4      | 21    | 17      | 5       | A    | 0           | 199812.097   | -0.014                     | 169.7658  |
| 43   | 2      | 41     | 43    | 1       | 42      | E    | 1           | 199831.760   | -0.044                     | 367.8984  |
| 43   | 3      | 41     | 43    | 2       | 42      | E    | 1           | 199831.760   | -0.044                     | 367.8984  |
| 13   | 11     | 3      | 12    | 10      | 3       | E    | 0           | 199957.519   | 0.016                      | 102.3282  |
| 13   | 11     | 2      | 12    | 10      | 2       | E    | 0           | 199974.270   | -0.058                     | 102.3408  |
| 32   | 7      | 26     | 31    | 6       | 25      | E    | 0           | 200003.678   | -0.111                     | 179.9518  |
| 13   | 11     | 3      | 12    | 10      | 2       | A    | 0           | 200004.466   | 0.040                      | 102.3296  |
| 13   | 11     | 2      | 12    | 10      | 3       | A    | 0           | 200004.466   | 0.040                      | 102.3296  |
| 32   | 7      | 26     | 31    | 6       | 25      | A    | 0           | 200018.027   | -0.018                     | 179.9434  |
| 48   | 5      | 43     | 48    | 4       | 44      | E    | 0           | 200185.626   | 0.005                      | 301.8539  |
| 48   | 6      | 43     | 48    | 5       | 44      | E    | 0           | 200185.626   | -0.002                     | 301.8539  |
| 48   | 5      | 43     | 48    | 4       | 44      | A    | 0           | 200209.110   | 0.062                      | 301.8472  |
| 48   | 6      | 43     | 48    | 5       | 44      | A    | 0           | 200209.110   | 0.055                      | 301.8472  |
| 48   | 5      | 43     | 48    | 4       | 44      | E    | 1           | 200222.995   | -0.126                     | 430.1619  |
| 48   | 6      | 43     | 48    | 5       | 44      | E    | 1           | 200222.995   | -0.133                     | 430.1619  |
| 69   | 15     | 54     | 69    | 14      | 55      | A    | 0           | 200275.144   | 0.007                      | 617.3286  |
| 60   | 20     | 40     | 60    | 19      | 41      | A    | 0           | 200292.348   | -0.030                     | 516.9910  |
| 32   | 13     | 20     | 31    | 13      | 19      | A    | 0           | 200312.155   | 0.012                      | 201.9419  |
| 32   | 13     | 19     | 31    | 13      | 18      | A    | 0           | 200314.090   | 0.002                      | 201.9420  |
| 32   | 13     | 19     | 31    | 13      | 18      | E    | 0           | 200314.090   | -0.171                     | 201.9500  |
| 32   | 13     | 20     | 31    | 13      | 19      | E    | 0           | 200316.469   | 0.044                      | 201.9367  |
| 60   | 20     | 41     | 60    | 19      | 42      | E    | 0           | 200477.741   | -0.081                     | 516.9743  |
| 20   | 6      | 14     | 19    | 5       | 15      | E    | 0           | 200483.434   | -0.001                     | 111.5177  |
| 20   | 6      | 14     | 19    | 5       | 15      | A    | 0           | 200486.420   | 0.027                      | 111.5077  |
| 60   | 20     | 41     | 60    | 19      | 42      | A    | 0           | 200592.604   | -0.040                     | 516.9796  |
| 49   | 19     | 31     | 49    | 18      | 32      | E    | 0           | 200748.045   | -0.026                     | 382.7808  |
| 15   | 10     | 6      | 14    | 9       | 6       | E    | 0           | 200772.234   | 0.007                      | 104.2767  |
| 49   | 19     | 30     | 49    | 18      | 31      | A    | 0           | 200779.442   | 0.076                      | 382.7907  |
| 49   | 19     | 31     | 49    | 18      | 32      | A    | 0           | 200781.998   | -0.112                     | 382.7906  |
| 15   | 10     | 5      | 14    | 9       | 5       | E    | 0           | 200794.239   | -0.050                     | 104.2885  |
| 15   | 10     | 5      | 14    | 9       | 6       | A    | 0           | 200819.847   | 0.006                      | 104.2765  |
| 68   | 21     | 48     | 68    | 20      | 49      | A    | 0           | 200843.656   | -0.035                     | 633.3605  |
| 45   | 3      | 42     | 45    | 2       | 43      | A    | 1           | 200904.847   | 0.061                      | 390.8994  |
| 45   | 4      | 42     | 45    | 3       | 43      | A    | 1           | 200904.847   | 0.061                      | 390.8994  |
| 33   | 6      | 27     | 32    | 7       | 26      | A    | 1           | 200925.106   | 0.025                      | 315.2020  |
| 33   | 6      | 27     | 32    | 7       | 26      | E    | 1           | 200982.502   | -0.064                     | 314.9481  |
| 33   | 6      | 27     | 32    | 7       | 26      | E    | 0           | 201040.377   | -0.023                     | 186.6232  |
| 33   | 6      | 27     | 32    | 7       | 26      | A    | 0           | 201041.343   | 0.019                      | 186.6153  |
| 32   | 12     | 21     | 31    | 12      | 20      | A    | 0           | 201127.891   | -0.000                     | 197.3605  |
| 32   | 12     | 20     | 31    | 12      | 19      | E    | 0           | 201142.547   | -0.026                     | 197.3702  |
| 32   | 12     | 21     | 31    | 12      | 20      | E    | 0           | 201143.476   | 0.012                      | 197.3573  |
| 19   | 8      | 12     | 18    | 7       | 11      | A    | 0           | 201145.578   | 0.014                      | 112.0083  |
| 32   | 12     | 20     | 31    | 12      | 19      | A    | 0           | 201152.745   | -0.018                     | 197.3612  |
| 32   | 8      | 25     | 31    | 8       | 24      | E    | 0           | 201259.186   | -0.015                     | 183.2005  |
| 32   | 8      | 25     | 31    | 8       | 24      | A    | 0           | 201262.024   | -0.014                     | 183.1928  |
| 19   | 8      | 11     | 18    | 7       | 11      | E    | 0           | 201268.750   | 0.049                      | 112.0182  |
| 67   | 21     | 46     | 67    | 20      | 47      | E    | 0           | 201316.193   | -0.012                     | 618.8941  |
| 67   | 21     | 46     | 67    | 20      | 47      | A    | 0           | 201329.226   | -0.052                     | 618.8966  |
| 17   | 9      | 9      | 16    | 8       | 9       | E    | 0           | 201394.471   | -0.005                     | 107.4811  |
| 17   | 9      | 8      | 16    | 8       | 8       | E    | 0           | 201421.923   | -0.048                     | 107.4919  |
| 31   | 7      | 24     | 30    | 7       | 23      | A    | 1           | 201427.059   | 0.116                      | 304.5161  |
| 17   | 9      | 9      | 16    | 8       | 8       | A    | 0           | 201440.020   | -0.061                     | 107.4793  |
| 17   | 9      | 8      | 16    | 8       | 9       | A    | 0           | 201444.941   | 0.110                      | 107.4791  |
| 19   | 8      | 12     | 18    | 7       | 12      | E    | 0           | 201462.047   | -0.015                     | 112.0009  |
| 50   | 6      | 44     | 50    | 5       | 45      | E    | 1           | 201463.478   | -0.007                     | 455.5967  |
| 50   | 7      | 44     | 50    | 6       | 45      | E    | 1           | 201463.478   | -0.049                     | 455.5967  |
| 50   | 6      | 44     | 50    | 5       | 45      | E    | 0           | 201468.227   | 0.012                      | 327.2910  |
| 50   | 7      | 44     | 50    | 6       | 45      | E    | 0           | 201468.227   | -0.026                     | 327.2910  |
| 50   | 6      | 44     | 50    | 5       | 45      | A    | 0           | 201488.626   | 0.008                      | 327.2853  |
| 50   | 7      | 44     | 50    | 6       | 45      | A    | 0           | 201488.626   | -0.030                     | 327.2853  |
| 19   | 8      | 11     | 18    | 7       | 12      | A    | 0           | 201648.850   | 0.056                      | 111.9938  |
| 48   | 19     | 30     | 48    | 18      | 31      | E    | 0           | 201674.941   | -0.013                     | 372.4996  |
| 31   | 7      | 24     | 30    | 7       | 23      | E    | 0           | 201695.419   | 0.045                      | 175.9123  |
| 31   | 7      | 24     | 30    | 7       | 23      | A    | 0           | 201704.628   | 0.006                      | 175.9030  |
| 48   | 19     | 29     | 48    | 18      | 30      | A    | 0           | 201706.068   | 0.027                      | 372.5097  |
| 48   | 19     | 30     | 48    | 18      | 31      | A    | 0           | 201707.238   | -0.139                     | 372.5096  |
| 45   | 3      | 42     | 45    | 2       | 43      | E    | 0           | 201758.276   | 0.020                      | 262.3080  |
| 45   | 4      | 42     | 45    | 3       | 43      | E    | 0           | 201758.276   | 0.020                      | 262.3080  |
| 34   | 5      | 29     | 33    | 6       | 28      | A    | 1           | 201800.133   | 0.058                      | 318.1598  |
| 35   | 4      | 31     | 34    | 5       | 30      | A    | 1           | 201812.665   | -0.019                     | 320.5990  |
| 35   | 5      | 31     | 34    | 5       | 30      | A    | 1           | 201814.465   | 0.013                      | 320.5990  |
| 35   | 4      | 31     | 34    | 4       | 30      | A    | 1           | 201816.014   | -0.061                     | 320.5989  |
| 35   | 5      | 31     | 34    | 4       | 30      | A    | 1           | 201817.863   | 0.019                      | 320.5989  |
| 34   | 6      | 29     | 33    | 6       | 28      | A    | 1           | 201854.240   | -0.034                     | 318.1598  |
| 31   | 9      | 22     | 30    | 9       | 21      | A    | 0           | 201855.331   | 0.029                      | 179.9750  |
| 31   | 9      | 22     | 30    | 9       | 21      | E    | 0           | 201863.066   | 0.017                      | 179.9826  |
| 45   | 3      | 42     | 45    | 2       | 43      | E    | 1           | 201879.473   | -0.076                     | 390.6142  |
| 45   | 4      | 42     | 45    | 3       | 43      | E    | 1           | 201879.473   | -0.076                     | 390.6142  |
| 34   | 5      | 29     | 33    | 5       | 28      | A    | 1           | 201898.016   | 0.015                      | 318.1565  |
| 36   | 3      | 33     | 35    | 3       | 32      | A    | 1           | 201909.431   | -0.026                     | 322.5611  |
| 36   | 3      | 33     | 35    | 4       | 32      | A    | 1           | 201909.431   | 0.049                      | 322.5612  |
| 36   | 4      | 33     | 35    | 3       | 32      | A    | 1           | 201909.431   | -0.063                     | 322.5611  |



| $J'$ | $K'_a$ | $K'_c$ | $J''$ | $K''_a$ | $K''_c$ | Sym. | $v_{tCH_3}$ | $\nu_{Obs.}$ | $\nu_{Obs.} - \nu_{Calc.}$ | $E_{low}$ |
|------|--------|--------|-------|---------|---------|------|-------------|--------------|----------------------------|-----------|
| 36   | 4      | 33     | 35    | 4       | 32      | A    | 1           | 201909.431   | 0.012                      | 322.5612  |
| 35   | 5      | 31     | 34    | 5       | 30      | E    | 1           | 201934.329   | -0.039                     | 320.3320  |
| 35   | 4      | 31     | 34    | 4       | 30      | E    | 1           | 201936.189   | -0.030                     | 320.3319  |
| 35   | 5      | 31     | 34    | 4       | 30      | E    | 1           | 201938.240   | -0.024                     | 320.3319  |
| 34   | 5      | 29     | 33    | 6       | 28      | E    | 1           | 201941.235   | -0.035                     | 317.9025  |
| 34   | 6      | 29     | 33    | 5       | 28      | A    | 1           | 201952.259   | 0.059                      | 318.1565  |
| 35   | 4      | 31     | 34    | 5       | 30      | E    | 0           | 201959.536   | -0.002                     | 192.0059  |
| 35   | 5      | 31     | 34    | 5       | 30      | E    | 0           | 201961.483   | 0.012                      | 192.0059  |
| 35   | 4      | 31     | 34    | 5       | 30      | A    | 0           | 201963.173   | -0.043                     | 191.9976  |
| 35   | 4      | 31     | 34    | 4       | 30      | E    | 0           | 201963.173   | -0.057                     | 192.0058  |
| 34   | 5      | 29     | 33    | 6       | 28      | E    | 0           | 201964.187   | 0.002                      | 189.5759  |
| 35   | 5      | 31     | 34    | 5       | 30      | A    | 0           | 201965.188   | 0.031                      | 191.9976  |
| 35   | 5      | 31     | 34    | 4       | 30      | E    | 0           | 201965.188   | 0.026                      | 192.0058  |
| 35   | 4      | 31     | 34    | 4       | 30      | A    | 0           | 201966.918   | -0.006                     | 191.9974  |
| 33   | 7      | 27     | 32    | 7       | 26      | A    | 1           | 201978.451   | 0.022                      | 315.2020  |
| 36   | 3      | 33     | 35    | 3       | 32      | E    | 1           | 202002.968   | -0.073                     | 322.2781  |
| 36   | 3      | 33     | 35    | 4       | 32      | E    | 1           | 202002.968   | 0.015                      | 322.2781  |
| 36   | 4      | 33     | 35    | 3       | 32      | E    | 1           | 202002.968   | -0.118                     | 322.2781  |
| 36   | 4      | 33     | 35    | 4       | 32      | E    | 1           | 202002.968   | -0.029                     | 322.2781  |
| 34   | 6      | 29     | 33    | 6       | 28      | E    | 0           | 202022.621   | -0.003                     | 189.5759  |
| 34   | 6      | 29     | 33    | 6       | 28      | A    | 0           | 202027.184   | 0.010                      | 189.5678  |
| 36   | 3      | 33     | 35    | 3       | 32      | E    | 0           | 202035.950   | -0.027                     | 193.9543  |
| 36   | 3      | 33     | 35    | 4       | 32      | E    | 0           | 202035.950   | 0.056                      | 193.9543  |
| 36   | 4      | 33     | 35    | 3       | 32      | E    | 0           | 202035.950   | -0.069                     | 193.9543  |
| 36   | 4      | 33     | 35    | 4       | 32      | E    | 0           | 202035.950   | 0.014                      | 193.9543  |
| 36   | 3      | 33     | 35    | 3       | 32      | A    | 0           | 202038.829   | -0.023                     | 193.9455  |
| 36   | 3      | 33     | 35    | 4       | 32      | A    | 0           | 202038.829   | 0.061                      | 193.9455  |
| 36   | 4      | 33     | 35    | 3       | 32      | A    | 0           | 202038.829   | -0.064                     | 193.9455  |
| 36   | 4      | 33     | 35    | 4       | 32      | A    | 0           | 202038.829   | 0.019                      | 193.9455  |
| 34   | 5      | 29     | 33    | 5       | 28      | E    | 1           | 202051.301   | -0.078                     | 317.8988  |
| 37   | 2      | 35     | 36    | 2       | 34      | A    | 1           | 202075.449   | -0.018                     | 324.0794  |
| 37   | 2      | 35     | 36    | 3       | 34      | A    | 1           | 202075.449   | -0.017                     | 324.0794  |
| 37   | 3      | 35     | 36    | 2       | 34      | A    | 1           | 202075.449   | -0.018                     | 324.0794  |
| 37   | 3      | 35     | 36    | 3       | 34      | A    | 1           | 202075.449   | -0.017                     | 324.0794  |
| 34   | 6      | 29     | 33    | 5       | 28      | E    | 1           | 202112.695   | -0.010                     | 317.8988  |
| 59   | 20     | 39     | 59    | 19      | 40      | A    | 0           | 202124.858   | 0.018                      | 504.2591  |
| 59   | 20     | 39     | 59    | 19      | 40      | E    | 0           | 202129.758   | -0.035                     | 504.2583  |
| 34   | 6      | 29     | 33    | 5       | 28      | A    | 0           | 202132.841   | -0.004                     | 189.5643  |
| 37   | 2      | 35     | 36    | 2       | 34      | E    | 1           | 202143.220   | -0.001                     | 323.7742  |
| 37   | 2      | 35     | 36    | 3       | 34      | E    | 1           | 202143.220   | 0.000                      | 323.7742  |
| 37   | 3      | 35     | 36    | 2       | 34      | E    | 1           | 202143.220   | -0.002                     | 323.7742  |
| 37   | 3      | 35     | 36    | 3       | 34      | E    | 1           | 202143.220   | -0.001                     | 323.7742  |
| 33   | 7      | 27     | 32    | 7       | 26      | E    | 1           | 202146.892   | -0.020                     | 314.9481  |
| 33   | 7      | 27     | 32    | 7       | 26      | E    | 0           | 202160.935   | -0.050                     | 186.6232  |
| 33   | 7      | 27     | 32    | 7       | 26      | A    | 0           | 202166.013   | 0.060                      | 186.6153  |
| 32   | 11     | 22     | 31    | 11      | 21      | A    | 0           | 202177.968   | 0.008                      | 193.2200  |
| 37   | 2      | 35     | 36    | 2       | 34      | E    | 0           | 202181.483   | -0.018                     | 195.4546  |
| 37   | 3      | 35     | 36    | 3       | 34      | E    | 0           | 202181.483   | -0.017                     | 195.4546  |
| 37   | 2      | 35     | 36    | 2       | 34      | A    | 0           | 202183.560   | -0.020                     | 195.4451  |
| 37   | 2      | 35     | 36    | 3       | 34      | A    | 0           | 202183.560   | -0.019                     | 195.4451  |
| 37   | 3      | 35     | 36    | 2       | 34      | A    | 0           | 202183.560   | -0.021                     | 195.4451  |
| 37   | 3      | 35     | 36    | 3       | 34      | A    | 0           | 202183.560   | -0.020                     | 195.4451  |
| 59   | 20     | 40     | 59    | 19      | 41      | E    | 0           | 202199.183   | -0.037                     | 504.2462  |
| 32   | 11     | 22     | 31    | 11      | 21      | E    | 0           | 202216.696   | -0.008                     | 193.2213  |
| 38   | 1      | 37     | 37    | 1       | 36      | A    | 1           | 202276.275   | 0.038                      | 325.1751  |
| 38   | 1      | 37     | 37    | 2       | 36      | A    | 1           | 202276.275   | 0.038                      | 325.1751  |
| 38   | 2      | 37     | 37    | 1       | 36      | A    | 1           | 202276.275   | 0.038                      | 325.1751  |
| 38   | 2      | 37     | 37    | 2       | 36      | A    | 1           | 202276.275   | 0.038                      | 325.1751  |
| 59   | 20     | 40     | 59    | 19      | 41      | A    | 0           | 202294.865   | -0.052                     | 504.2527  |
| 38   | 1      | 37     | 37    | 1       | 36      | E    | 1           | 202316.971   | -0.033                     | 324.8417  |
| 38   | 1      | 37     | 37    | 2       | 36      | E    | 1           | 202316.971   | -0.033                     | 324.8417  |
| 38   | 2      | 37     | 37    | 1       | 36      | E    | 1           | 202316.971   | -0.033                     | 324.8417  |
| 38   | 2      | 37     | 37    | 2       | 36      | E    | 1           | 202316.971   | -0.033                     | 324.8417  |
| 38   | 1      | 37     | 37    | 1       | 36      | E    | 0           | 202360.815   | 0.024                      | 196.5281  |
| 38   | 2      | 37     | 37    | 2       | 36      | E    | 0           | 202360.815   | 0.024                      | 196.5281  |
| 38   | 1      | 37     | 37    | 1       | 36      | A    | 0           | 202362.026   | -0.017                     | 196.5177  |
| 38   | 1      | 37     | 37    | 2       | 36      | A    | 0           | 202362.026   | -0.017                     | 196.5177  |
| 38   | 2      | 37     | 37    | 1       | 36      | A    | 0           | 202362.026   | -0.017                     | 196.5177  |
| 38   | 2      | 37     | 37    | 2       | 36      | A    | 0           | 202362.026   | -0.017                     | 196.5177  |
| 32   | 11     | 21     | 31    | 11      | 20      | E    | 0           | 202390.188   | -0.086                     | 193.2363  |
| 52   | 7      | 45     | 52    | 6       | 46      | E    | 1           | 202404.494   | 0.125                      | 482.0923  |
| 52   | 8      | 45     | 52    | 7       | 46      | E    | 1           | 202404.494   | -0.077                     | 482.0923  |
| 32   | 11     | 21     | 31    | 11      | 20      | A    | 0           | 202422.269   | 0.089                      | 193.2289  |
| 52   | 7      | 45     | 52    | 6       | 46      | E    | 0           | 202452.466   | 0.068                      | 353.7904  |
| 52   | 8      | 45     | 52    | 7       | 46      | E    | 0           | 202452.466   | -0.117                     | 353.7904  |
| 52   | 7      | 45     | 52    | 6       | 46      | A    | 0           | 202469.763   | 0.051                      | 353.7857  |
| 52   | 8      | 45     | 52    | 7       | 46      | A    | 0           | 202469.763   | -0.136                     | 353.7857  |
| 39   | 0      | 39     | 38    | 0       | 38      | A    | 1           | 202493.261   | 0.076                      | 325.8627  |
| 39   | 0      | 39     | 38    | 1       | 38      | A    | 1           | 202493.261   | 0.076                      | 325.8627  |
| 39   | 1      | 39     | 38    | 0       | 38      | A    | 1           | 202493.261   | 0.076                      | 325.8627  |
| 39   | 1      | 39     | 38    | 1       | 38      | A    | 1           | 202493.261   | 0.076                      | 325.8627  |
| 39   | 0      | 39     | 38    | 0       | 38      | E    | 1           | 202504.593   | -0.015                     | 325.4949  |
| 39   | 0      | 39     | 38    | 1       | 38      | E    | 1           | 202504.593   | -0.015                     | 325.4949  |
| 39   | 1      | 39     | 38    | 0       | 38      | E    | 1           | 202504.593   | -0.015                     | 325.4949  |
| 39   | 1      | 39     | 38    | 1       | 38      | E    | 1           | 202504.593   | -0.015                     | 325.4949  |
| 47   | 19     | 28     | 47    | 18      | 29      | E    | 0           | 202513.448   | -0.054                     | 362.4517  |
| 47   | 19     | 29     | 47    | 18      | 30      | E    | 0           | 202532.599   | -0.006                     | 362.4401  |
| 39   | 0      | 39     | 38    | 0       | 38      | A    | 0           | 202554.650   | -0.212                     | 197.1775  |
| 39   | 0      | 39     | 38    | 1       | 38      | A    | 0           | 202554.650   | -0.212                     | 197.1775  |
| 39   | 1      | 39     | 38    | 0       | 38      | A    | 0           | 202554.650   | -0.212                     | 197.1775  |
| 39   | 1      | 39     | 38    | 1       | 38      | A    | 0           | 202554.650   | -0.212                     | 197.1775  |
| 39   | 0      | 39     | 38    | 0       | 38      | E    | 0           | 202554.650   | 0.146                      | 197.1889  |
| 39   | 1      | 39     | 38    | 1       | 38      | E    | 0           | 202554.650   | 0.146                      | 197.1889  |
| 33   | 6      | 27     | 32    | 6       | 26      | A    | 1           | 202677.356   | 0.047                      | 315.1435  |
| 33   | 6      | 27     | 32    | 6       | 26      | E    | 0           | 202897.866   | 0.081                      | 186.5612  |
| 33   | 6      | 27     | 32    | 6       | 26      | A    | 0           | 202904.962   | -0.048                     | 186.5531  |
| 32   | 10     | 23     | 31    | 10      | 22      | A    | 0           | 203248.566   | -0.030                     | 189.5338  |
| 32   | 10     | 23     | 31    | 10      | 22      | E    | 0           | 203256.365   | -0.175                     | 189.5391  |
| 56   | 9      | 47     | 56    | 8       | 48      | E    | 1           | 203284.088   | 0.231                      | 538.2350  |
| 56   | 10     | 47     | 56    | 9       | 48      | E    | 1           | 203287.649   | 0.264                      | 538.2350  |
| 46   | 19     | 27     | 46    | 18      | 28      | E    | 0           | 203306.556   | -0.037                     | 352.6129  |
| 46   | 19     | 28     | 46    | 18      | 29      | E    | 0           | 203326.264   | -0.027                     | 352.6012  |
| 46   | 19     | 27     | 46    | 18      | 28      | A    | 0           | 203356.391   | 0.109                      | 352.6116  |
| 32   | 9      | 24     | 31    | 9       | 23      | A    | 0           | 203369.649   | -0.037                     | 186.2560  |
| 32   | 9      | 24     | 31    | 9       | 23      | E    | 0           | 203370.730   | 0.045                      | 186.2629  |
| 56   | 9      | 47     | 56    | 8       | 48      | A    | 0           | 203433.159   | -0.066                     | 409.9430  |
| 56   | 10     | 47     | 56    | 9       | 48      | A    | 0           | 203436.376   | -0.112                     | 409.9430  |
| 35   | 8      | 27     | 34    | 9       | 26      | A    | 0           | 203462.208   | -0.060                     | 207.2204  |
| 47   | 4      | 43     | 47    | 3       | 44      | E    | 0           | 203604.076   | 0.003                      | 286.1059  |
| 47   | 5      | 43     | 47    | 4       | 44      | E    | 0           | 203604.076   | 0.003                      | 286.1059  |
| 47   | 4      | 43     | 47    | 3       | 44      | A    | 0           | 203631.157   | 0.063                      | 286.0982  |
| 47   | 5      | 43     | 47    | 4       | 44      | A    | 0           | 203631.157   | 0.062                      | 286.0982  |
| 67   | 14     | 53     | 67    | 13      | 54      | A    | 0           | 203644.870   | -0.173                     | 582.1131  |
| 67   | 14     | 53     | 67    | 13      | 54      | E    | 0           | 203652.588   | 0.043                      | 582.1132  |
| 47   | 4      | 43     | 47    | 3       | 44      | E    | 1           | 203684.575   | -0.072                     | 414.4129  |
| 47   | 5      | 43     | 47    | 4       | 44      | E    | 1           | 203684.575   | -0.072                     | 414.4129  |



| $J'$ | $K'_a$ | $K'_c$ | $J''$ | $K''_a$ | $K''_c$ | Sym. | $v_{tCH_3}$ | $\nu_{Obs.}$ | $\nu_{Obs.} - \nu_{Calc.}$ | $E_{low}$ |
|------|--------|--------|-------|---------|---------|------|-------------|--------------|----------------------------|-----------|
| 33   | 7      | 27     | 32    | 6       | 26      | A    | 1           | 203730.749   | 0.091                      | 315.1435  |
| 33   | 22     | 11     | 32    | 22      | 10      | A    | 0           | 203752.681   | -0.047                     | 267.9528  |
| 33   | 22     | 12     | 32    | 22      | 11      | A    | 0           | 203752.681   | -0.047                     | 267.9528  |
| 58   | 20     | 38     | 58    | 19      | 39      | E    | 0           | 203773.834   | -0.038                     | 491.7601  |
| 58   | 20     | 38     | 58    | 19      | 39      | A    | 0           | 203787.804   | -0.035                     | 491.7603  |
| 58   | 20     | 39     | 58    | 19      | 40      | E    | 0           | 203807.877   | 0.018                      | 491.7492  |
| 58   | 20     | 39     | 58    | 19      | 40      | A    | 0           | 203882.409   | -0.045                     | 491.7568  |
| 33   | 21     | 13     | 32    | 21      | 12      | A    | 0           | 203910.048   | -0.293                     | 259.7887  |
| 33   | 21     | 12     | 32    | 21      | 11      | A    | 0           | 203910.048   | -0.293                     | 259.7887  |
| 33   | 21     | 12     | 32    | 21      | 11      | E    | 0           | 203911.182   | 0.037                      | 259.7845  |
| 33   | 7      | 27     | 32    | 6       | 26      | E    | 0           | 204018.351   | -0.019                     | 186.5612  |
| 33   | 7      | 27     | 32    | 6       | 26      | A    | 0           | 204029.640   | 0.001                      | 186.5531  |
| 45   | 19     | 26     | 45    | 18      | 27      | E    | 0           | 204040.462   | -0.031                     | 342.9940  |
| 45   | 19     | 27     | 45    | 18      | 28      | E    | 0           | 204060.722   | -0.016                     | 342.9822  |
| 33   | 7      | 27     | 32    | 6       | 26      | E    | 1           | 204070.261   | -0.002                     | 314.8840  |
| 45   | 19     | 26     | 45    | 18      | 27      | A    | 0           | 204090.148   | 0.052                      | 342.9927  |
| 33   | 20     | 13     | 32    | 20      | 12      | A    | 0           | 204091.806   | -0.132                     | 252.0121  |
| 33   | 20     | 14     | 32    | 20      | 13      | A    | 0           | 204091.806   | -0.132                     | 252.0121  |
| 33   | 20     | 13     | 32    | 20      | 12      | E    | 0           | 204092.874   | 0.057                      | 252.0095  |
| 66   | 21     | 45     | 66    | 20      | 46      | A    | 0           | 204159.141   | -0.112                     | 604.5743  |
| 33   | 19     | 15     | 32    | 19      | 14      | A    | 0           | 204302.994   | -0.058                     | 244.6244  |
| 33   | 19     | 14     | 32    | 19      | 13      | A    | 0           | 204302.994   | -0.058                     | 244.6244  |
| 33   | 19     | 15     | 32    | 19      | 14      | E    | 0           | 204304.084   | -0.041                     | 244.6121  |
| 33   | 18     | 15     | 32    | 18      | 14      | A    | 0           | 204550.926   | -0.040                     | 237.6273  |
| 33   | 18     | 16     | 32    | 18      | 15      | A    | 0           | 204550.926   | -0.040                     | 237.6273  |
| 33   | 18     | 15     | 32    | 18      | 14      | E    | 0           | 204552.114   | 0.123                      | 237.6279  |
| 44   | 2      | 42     | 44    | 1       | 43      | E    | 0           | 204612.511   | 0.060                      | 247.3706  |
| 44   | 3      | 42     | 44    | 2       | 43      | E    | 0           | 204612.511   | 0.060                      | 247.3706  |
| 44   | 2      | 42     | 44    | 1       | 43      | A    | 0           | 204646.152   | 0.128                      | 247.3605  |
| 44   | 3      | 42     | 44    | 2       | 43      | A    | 0           | 204646.152   | 0.128                      | 247.3605  |
| 44   | 19     | 25     | 44    | 18      | 26      | E    | 0           | 204719.400   | -0.063                     | 333.5940  |
| 44   | 19     | 26     | 44    | 18      | 27      | E    | 0           | 204740.211   | 0.001                      | 333.5822  |
| 44   | 19     | 25     | 44    | 18      | 26      | A    | 0           | 204768.944   | -0.003                     | 333.5928  |
| 44   | 2      | 42     | 44    | 1       | 43      | E    | 1           | 204776.746   | -0.019                     | 375.6730  |
| 44   | 3      | 42     | 44    | 2       | 43      | E    | 1           | 204776.746   | -0.019                     | 375.6730  |
| 33   | 17     | 17     | 32    | 17      | 15      | A    | 0           | 204845.451   | -0.030                     | 231.0233  |
| 33   | 17     | 16     | 32    | 17      | 15      | A    | 0           | 204845.451   | -0.030                     | 231.0233  |
| 32   | 10     | 22     | 31    | 10      | 21      | A    | 0           | 204939.083   | 0.004                      | 189.6117  |
| 32   | 10     | 22     | 31    | 10      | 21      | E    | 0           | 204940.608   | -0.000                     | 189.6180  |
| 49   | 5      | 44     | 49    | 4       | 45      | E    | 0           | 205195.701   | -0.016                     | 310.9813  |
| 49   | 6      | 44     | 49    | 5       | 45      | E    | 0           | 205195.701   | -0.020                     | 310.9813  |
| 33   | 16     | 17     | 32    | 16      | 16      | A    | 0           | 205200.119   | -0.014                     | 224.8155  |
| 33   | 16     | 18     | 32    | 16      | 17      | A    | 0           | 205200.119   | -0.013                     | 224.8155  |
| 33   | 16     | 17     | 32    | 16      | 16      | E    | 0           | 205201.229   | -0.054                     | 224.8192  |
| 33   | 16     | 18     | 32    | 16      | 17      | E    | 0           | 205202.146   | 0.068                      | 224.8061  |
| 66   | 21     | 46     | 66    | 20      | 47      | A    | 0           | 205208.610   | -0.023                     | 604.5339  |
| 49   | 5      | 44     | 49    | 4       | 45      | A    | 0           | 205219.752   | 0.021                      | 310.9747  |
| 49   | 6      | 44     | 49    | 5       | 45      | A    | 0           | 205219.752   | -0.023                     | 310.9747  |
| 49   | 5      | 44     | 49    | 4       | 45      | E    | 1           | 205234.467   | -0.095                     | 439.2874  |
| 49   | 6      | 44     | 49    | 5       | 45      | E    | 1           | 205234.467   | -0.099                     | 439.2874  |
| 12   | 12     | 1      | 11    | 11      | 1       | E    | 0           | 205244.579   | 0.009                      | 103.8641  |
| 12   | 12     | 0      | 11    | 11      | 0       | E    | 0           | 205256.051   | -0.052                     | 103.8772  |
| 12   | 12     | 0      | 11    | 11      | 1       | A    | 0           | 205290.289   | 0.017                      | 103.8671  |
| 12   | 12     | 1      | 11    | 11      | 0       | A    | 0           | 205290.289   | 0.017                      | 103.8671  |
| 57   | 20     | 38     | 57    | 19      | 39      | E    | 0           | 205301.817   | 0.030                      | 479.4821  |
| 57   | 20     | 37     | 57    | 19      | 38      | A    | 0           | 205307.728   | -0.030                     | 479.4925  |
| 43   | 19     | 24     | 43    | 18      | 25      | E    | 0           | 205347.333   | -0.031                     | 324.4123  |
| 57   | 20     | 38     | 57    | 19      | 39      | A    | 0           | 205359.459   | 0.003                      | 479.4906  |
| 43   | 19     | 25     | 43    | 18      | 26      | E    | 0           | 205368.569   | -0.003                     | 324.4005  |
| 43   | 19     | 24     | 43    | 18      | 25      | A    | 0           | 205396.694   | -0.026                     | 324.4111  |
| 31   | 8      | 23     | 30    | 8       | 22      | A    | 0           | 205476.262   | 0.077                      | 177.7646  |
| 31   | 8      | 23     | 30    | 8       | 22      | E    | 0           | 205477.682   | 0.051                      | 177.7737  |
| 33   | 15     | 19     | 32    | 15      | 18      | A    | 0           | 205634.194   | -0.034                     | 219.0082  |
| 33   | 15     | 18     | 32    | 15      | 17      | E    | 0           | 205635.400   | -0.038                     | 219.0135  |
| 33   | 15     | 19     | 32    | 15      | 18      | E    | 0           | 205636.629   | 0.014                      | 219.0001  |
| 42   | 19     | 23     | 42    | 18      | 24      | E    | 0           | 205927.661   | -0.059                     | 315.4480  |
| 42   | 19     | 24     | 42    | 18      | 25      | E    | 0           | 205949.371   | 0.021                      | 315.4362  |
| 42   | 19     | 23     | 42    | 18      | 24      | A    | 0           | 205976.928   | -0.019                     | 315.4470  |
| 14   | 11     | 4      | 13    | 10      | 4       | E    | 0           | 206099.517   | -0.002                     | 105.0016  |
| 14   | 11     | 3      | 13    | 10      | 3       | E    | 0           | 206116.357   | -0.032                     | 105.0141  |
| 14   | 11     | 4      | 13    | 10      | 3       | A    | 0           | 206146.504   | 0.044                      | 105.0030  |
| 14   | 11     | 3      | 13    | 10      | 4       | A    | 0           | 206146.504   | 0.044                      | 105.0030  |
| 21   | 7      | 14     | 20    | 6       | 15      | A    | 0           | 206158.168   | 0.019                      | 117.8265  |
| 33   | 14     | 20     | 32    | 14      | 19      | A    | 0           | 206176.594   | 0.132                      | 213.6079  |
| 33   | 14     | 19     | 32    | 14      | 18      | E    | 0           | 206177.827   | -0.012                     | 213.6146  |
| 33   | 14     | 20     | 32    | 14      | 19      | E    | 0           | 206179.533   | -0.007                     | 213.6012  |
| 32   | 7      | 25     | 31    | 7       | 24      | E    | 0           | 206257.058   | -0.023                     | 182.6401  |
| 32   | 7      | 25     | 31    | 7       | 24      | A    | 0           | 206267.823   | -0.022                     | 182.6311  |
| 41   | 19     | 22     | 41    | 18      | 23      | E    | 0           | 206463.698   | -0.055                     | 306.7005  |
| 34   | 6      | 28     | 33    | 7       | 27      | A    | 1           | 206483.649   | -0.000                     | 321.9392  |
| 41   | 19     | 23     | 41    | 18      | 24      | E    | 0           | 206485.777   | 0.006                      | 306.6887  |
| 41   | 19     | 22     | 41    | 18      | 23      | A    | 0           | 206512.844   | -0.012                     | 306.6996  |
| 51   | 6      | 45     | 51    | 5       | 46      | E    | 1           | 206514.186   | -0.073                     | 465.2308  |
| 51   | 7      | 45     | 51    | 6       | 46      | E    | 1           | 206514.186   | -0.095                     | 465.2308  |
| 51   | 6      | 45     | 51    | 5       | 46      | E    | 0           | 206518.032   | -0.006                     | 336.9269  |
| 51   | 7      | 45     | 51    | 6       | 46      | E    | 0           | 206518.032   | -0.025                     | 336.9269  |
| 51   | 6      | 45     | 51    | 5       | 46      | A    | 0           | 206538.968   | -0.012                     | 336.9214  |
| 51   | 7      | 45     | 51    | 6       | 46      | A    | 0           | 206538.968   | -0.032                     | 336.9214  |
| 20   | 8      | 13     | 19    | 7       | 12      | A    | 0           | 206576.798   | 0.015                      | 116.0067  |
| 34   | 6      | 28     | 33    | 7       | 27      | E    | 1           | 206584.099   | -0.070                     | 321.6910  |
| 34   | 6      | 28     | 33    | 7       | 27      | E    | 0           | 206627.924   | -0.007                     | 193.3665  |
| 34   | 6      | 28     | 33    | 7       | 27      | A    | 0           | 206630.504   | -0.017                     | 193.3588  |
| 65   | 21     | 44     | 65    | 20      | 45      | A    | 0           | 206635.984   | -0.055                     | 590.4978  |
| 65   | 21     | 44     | 65    | 20      | 45      | E    | 0           | 206655.029   | -0.068                     | 590.4951  |
| 56   | 20     | 36     | 56    | 19      | 37      | E    | 0           | 206665.440   | -0.026                     | 467.4544  |
| 56   | 20     | 37     | 56    | 19      | 38      | E    | 0           | 206685.718   | -0.034                     | 467.4438  |
| 56   | 20     | 36     | 56    | 19      | 37      | A    | 0           | 206704.164   | 0.026                      | 467.4539  |
| 46   | 3      | 43     | 46    | 2       | 44      | E    | 0           | 206713.946   | 0.032                      | 270.5912  |
| 46   | 4      | 43     | 46    | 3       | 44      | E    | 0           | 206713.946   | 0.032                      | 270.5912  |
| 56   | 20     | 37     | 56    | 19      | 38      | A    | 0           | 206731.864   | -0.020                     | 467.4529  |
| 46   | 3      | 43     | 46    | 2       | 44      | A    | 0           | 206744.551   | -0.023                     | 270.5824  |
| 46   | 4      | 43     | 46    | 3       | 44      | A    | 0           | 206744.551   | -0.023                     | 270.5824  |
| 20   | 8      | 12     | 19    | 7       | 12      | E    | 0           | 206776.146   | -0.036                     | 116.0160  |
| 33   | 8      | 26     | 32    | 8       | 25      | E    | 0           | 206802.438   | -0.023                     | 189.9138  |
| 33   | 8      | 26     | 32    | 8       | 25      | A    | 0           | 206806.100   | 0.008                      | 189.9062  |
| 34   | 7      | 27     | 33    | 8       | 26      | E    | 1           | 206816.832   | -0.218                     | 325.1327  |
| 46   | 3      | 43     | 46    | 2       | 44      | E    | 1           | 206837.706   | -0.053                     | 398.8957  |
| 46   | 4      | 43     | 46    | 3       | 44      | E    | 1           | 206837.706   | -0.053                     | 398.8957  |
| 33   | 13     | 21     | 32    | 13      | 20      | A    | 0           | 206870.859   | 0.024                      | 208.6236  |
| 33   | 13     | 20     | 32    | 13      | 19      | E    | 0           | 206874.095   | -0.108                     | 208.6317  |
| 33   | 13     | 20     | 32    | 13      | 19      | A    | 0           | 206875.043   | 0.015                      | 208.6237  |
| 33   | 13     | 21     | 32    | 13      | 20      | E    | 0           | 206876.640   | 0.046                      | 208.6185  |
| 16   | 10     | 7      | 15    | 9       | 7       | E    | 0           | 206882.050   | 0.031                      | 107.3730  |
| 16   | 10     | 6      | 15    | 9       | 6       | E    | 0           | 206904.178   | -0.031                     | 107.3848  |
| 35   | 5      | 30     | 34    | 6       | 29      | A    | 1           | 206918.615   | 0.017                      | 324.8929  |
| 36   | 4      | 32     | 35    | 5       | 31      | A    | 1           | 206926.218   | -0.029                     | 327.3308  |



| $J'$ | $K'_a$ | $K'_c$ | $J''$ | $K''_a$ | $K''_c$ | Sym. | $v_{tCH_3}$ | $\nu_{Obs.}$ | $\nu_{Obs.} - \nu_{Calc.}$ | $E_{low}$ |
|------|--------|--------|-------|---------|---------|------|-------------|--------------|----------------------------|-----------|
| 36   | 5      | 32     | 35    | 5       | 31      | A    | 1           | 206927.232   | 0.070                      | 327.3308  |
| 36   | 4      | 32     | 35    | 4       | 31      | A    | 1           | 206927.961   | -0.054                     | 327.3308  |
| 16   | 10     | 6      | 15    | 9       | 7       | A    | 0           | 206929.755   | 0.034                      | 107.3727  |
| 35   | 6      | 30     | 34    | 6       | 29      | A    | 1           | 206948.302   | 0.009                      | 324.8929  |
| 40   | 19     | 21     | 40    | 18      | 22      | E    | 0           | 206958.365   | -0.066                     | 298.1692  |
| 35   | 5      | 30     | 34    | 5       | 29      | A    | 1           | 206972.822   | 0.024                      | 324.8911  |
| 40   | 19     | 22     | 40    | 18      | 23      | E    | 0           | 206980.823   | 0.019                      | 298.1573  |
| 34   | 7      | 27     | 33    | 8       | 26      | A    | 0           | 206986.105   | -0.025                     | 196.8045  |
| 34   | 7      | 27     | 33    | 8       | 26      | E    | 0           | 206998.132   | 0.004                      | 196.8119  |
| 35   | 6      | 30     | 34    | 5       | 29      | A    | 1           | 207002.580   | 0.087                      | 324.8911  |
| 40   | 19     | 22     | 40    | 18      | 23      | A    | 0           | 207007.367   | -0.051                     | 298.1683  |
| 40   | 19     | 21     | 40    | 18      | 22      | A    | 0           | 207007.367   | -0.049                     | 298.1683  |
| 37   | 3      | 34     | 36    | 3       | 33      | A    | 1           | 207031.770   | -0.020                     | 329.2961  |
| 37   | 3      | 34     | 36    | 4       | 33      | A    | 1           | 207031.770   | 0.018                      | 329.2961  |
| 37   | 4      | 34     | 36    | 3       | 33      | A    | 1           | 207031.770   | -0.038                     | 329.2961  |
| 37   | 4      | 34     | 36    | 4       | 33      | A    | 1           | 207031.770   | -0.001                     | 329.2961  |
| 36   | 4      | 32     | 35    | 5       | 31      | E    | 1           | 207044.859   | -0.034                     | 327.0679  |
| 36   | 5      | 32     | 35    | 5       | 31      | E    | 1           | 207045.933   | -0.027                     | 327.0679  |
| 36   | 4      | 32     | 35    | 4       | 31      | E    | 1           | 207046.922   | -0.016                     | 327.0678  |
| 36   | 5      | 32     | 35    | 4       | 31      | E    | 1           | 207047.966   | -0.038                     | 327.0678  |
| 35   | 5      | 30     | 34    | 6       | 29      | E    | 1           | 207061.213   | -0.025                     | 324.6406  |
| 36   | 4      | 32     | 35    | 5       | 31      | E    | 0           | 207073.906   | -0.030                     | 198.7426  |
| 36   | 5      | 32     | 35    | 5       | 31      | E    | 0           | 207074.975   | 0.035                      | 198.7426  |
| 36   | 4      | 32     | 35    | 4       | 31      | E    | 0           | 207075.815   | -0.052                     | 198.7425  |
| 36   | 5      | 32     | 35    | 4       | 31      | E    | 0           | 207076.806   | -0.066                     | 198.7425  |
| 36   | 4      | 32     | 35    | 5       | 31      | A    | 0           | 207077.606   | 0.022                      | 198.7344  |
| 36   | 5      | 32     | 35    | 5       | 31      | A    | 0           | 207078.613   | 0.020                      | 198.7344  |
| 36   | 4      | 32     | 35    | 4       | 31      | A    | 0           | 207079.468   | -0.057                     | 198.7343  |
| 36   | 5      | 32     | 35    | 4       | 31      | A    | 0           | 207080.525   | -0.010                     | 198.7343  |
| 35   | 5      | 30     | 34    | 6       | 29      | E    | 0           | 207085.064   | -0.009                     | 196.3146  |
| 35   | 5      | 30     | 34    | 6       | 29      | A    | 0           | 207089.435   | 0.000                      | 196.3067  |
| 35   | 6      | 30     | 34    | 6       | 29      | E    | 1           | 207095.017   | -0.033                     | 324.6406  |
| 34   | 7      | 28     | 33    | 7       | 27      | A    | 1           | 207105.936   | 0.054                      | 321.9392  |
| 35   | 6      | 30     | 34    | 6       | 29      | E    | 0           | 207117.220   | 0.021                      | 196.3146  |
| 35   | 6      | 30     | 34    | 6       | 29      | A    | 0           | 207121.632   | -0.075                     | 196.3067  |
| 37   | 3      | 34     | 36    | 3       | 33      | E    | 1           | 207124.752   | -0.041                     | 329.0162  |
| 37   | 3      | 34     | 36    | 4       | 33      | E    | 1           | 207124.752   | 0.003                      | 329.0162  |
| 37   | 4      | 34     | 36    | 3       | 33      | E    | 1           | 207124.752   | -0.063                     | 329.0162  |
| 37   | 4      | 34     | 36    | 4       | 33      | E    | 1           | 207124.752   | -0.019                     | 329.0162  |
| 35   | 5      | 30     | 34    | 5       | 29      | E    | 0           | 207143.527   | 0.015                      | 196.3127  |
| 35   | 5      | 30     | 34    | 5       | 29      | A    | 0           | 207148.155   | 0.026                      | 196.3048  |
| 35   | 6      | 30     | 34    | 5       | 29      | E    | 1           | 207156.361   | -0.016                     | 324.6385  |
| 37   | 3      | 34     | 36    | 3       | 33      | E    | 0           | 207159.359   | -0.014                     | 200.6935  |
| 37   | 3      | 34     | 36    | 4       | 33      | E    | 0           | 207159.359   | 0.028                      | 200.6935  |
| 37   | 4      | 34     | 36    | 3       | 33      | E    | 0           | 207159.359   | -0.034                     | 200.6935  |
| 37   | 4      | 34     | 36    | 4       | 33      | E    | 0           | 207159.359   | 0.007                      | 200.6935  |
| 37   | 3      | 34     | 36    | 3       | 33      | A    | 0           | 207162.203   | -0.027                     | 200.6848  |
| 37   | 3      | 34     | 36    | 4       | 33      | A    | 0           | 207162.203   | 0.015                      | 200.6848  |
| 37   | 4      | 34     | 36    | 3       | 33      | A    | 0           | 207162.203   | -0.047                     | 200.6848  |
| 37   | 4      | 34     | 36    | 4       | 33      | A    | 0           | 207162.203   | -0.006                     | 200.6848  |
| 35   | 6      | 30     | 34    | 5       | 29      | E    | 0           | 207175.634   | -0.003                     | 196.3127  |
| 35   | 6      | 30     | 34    | 5       | 29      | A    | 0           | 207180.404   | 0.003                      | 196.3048  |
| 38   | 2      | 36     | 37    | 2       | 35      | A    | 1           | 207201.436   | -0.023                     | 330.8199  |
| 38   | 2      | 36     | 37    | 3       | 35      | A    | 1           | 207201.436   | -0.023                     | 330.8199  |
| 38   | 3      | 36     | 37    | 2       | 35      | A    | 1           | 207201.436   | -0.024                     | 330.8199  |
| 38   | 3      | 36     | 37    | 3       | 35      | A    | 1           | 207201.436   | -0.023                     | 330.8199  |
| 65   | 21     | 45     | 65    | 20      | 46      | A    | 0           | 207260.170   | -0.050                     | 590.4740  |
| 38   | 2      | 36     | 37    | 2       | 35      | E    | 1           | 207268.902   | -0.033                     | 330.5169  |
| 38   | 2      | 36     | 37    | 3       | 35      | E    | 1           | 207268.902   | -0.032                     | 330.5169  |
| 38   | 3      | 36     | 37    | 2       | 35      | E    | 1           | 207268.902   | -0.033                     | 330.5169  |
| 38   | 3      | 36     | 37    | 3       | 35      | E    | 1           | 207268.902   | -0.032                     | 330.5169  |
| 34   | 7      | 28     | 33    | 7       | 27      | E    | 1           | 207276.620   | 0.017                      | 321.6910  |
| 34   | 7      | 28     | 33    | 7       | 27      | E    | 0           | 207292.180   | -0.003                     | 193.3665  |
| 34   | 7      | 28     | 33    | 7       | 27      | A    | 0           | 207297.235   | -0.072                     | 193.3588  |
| 38   | 2      | 36     | 37    | 2       | 35      | E    | 0           | 207308.718   | 0.002                      | 202.1987  |
| 38   | 3      | 36     | 37    | 3       | 35      | E    | 0           | 207308.718   | 0.002                      | 202.1987  |
| 38   | 2      | 36     | 37    | 2       | 35      | A    | 0           | 207310.779   | -0.008                     | 202.1892  |
| 38   | 2      | 36     | 37    | 3       | 35      | A    | 0           | 207310.779   | -0.008                     | 202.1892  |
| 38   | 3      | 36     | 37    | 2       | 35      | A    | 0           | 207310.779   | -0.008                     | 202.1892  |
| 38   | 3      | 36     | 37    | 3       | 35      | A    | 0           | 207310.779   | -0.008                     | 202.1892  |
| 39   | 1      | 38     | 38    | 1       | 37      | A    | 1           | 207403.452   | 0.004                      | 331.9223  |
| 39   | 1      | 38     | 38    | 2       | 37      | A    | 1           | 207403.452   | 0.004                      | 331.9223  |
| 39   | 2      | 38     | 38    | 1       | 37      | A    | 1           | 207403.452   | 0.004                      | 331.9223  |
| 39   | 2      | 38     | 38    | 2       | 37      | A    | 1           | 207403.452   | 0.004                      | 331.9223  |
| 18   | 9      | 10     | 17    | 8       | 10      | E    | 0           | 207405.806   | -0.004                     | 111.0121  |
| 39   | 19     | 20     | 39    | 18      | 21      | E    | 0           | 207414.451   | -0.039                     | 289.8533  |
| 18   | 9      | 9      | 17    | 8       | 9       | E    | 0           | 207433.458   | -0.038                     | 111.0228  |
| 39   | 19     | 21     | 39    | 18      | 22      | E    | 0           | 207437.232   | 0.043                      | 289.8414  |
| 39   | 1      | 38     | 38    | 1       | 37      | E    | 1           | 207444.062   | -0.022                     | 331.5903  |
| 39   | 1      | 38     | 38    | 2       | 37      | E    | 1           | 207444.062   | -0.022                     | 331.5903  |
| 39   | 2      | 38     | 38    | 1       | 37      | E    | 1           | 207444.062   | -0.022                     | 331.5903  |
| 39   | 2      | 38     | 38    | 2       | 37      | E    | 1           | 207444.062   | -0.022                     | 331.5903  |
| 18   | 9      | 10     | 17    | 8       | 9       | A    | 0           | 207447.431   | -0.007                     | 111.0103  |
| 18   | 9      | 9      | 17    | 8       | 10      | A    | 0           | 207460.516   | 0.081                      | 111.0099  |
| 39   | 19     | 21     | 39    | 18      | 22      | A    | 0           | 207463.313   | -0.053                     | 289.8525  |
| 39   | 19     | 20     | 39    | 18      | 21      | A    | 0           | 207463.313   | -0.053                     | 289.8525  |
| 39   | 1      | 38     | 38    | 1       | 37      | E    | 0           | 207489.297   | 0.014                      | 203.2781  |
| 39   | 2      | 38     | 38    | 2       | 37      | E    | 0           | 207489.297   | 0.014                      | 203.2781  |
| 39   | 1      | 38     | 38    | 1       | 37      | A    | 0           | 207490.514   | -0.018                     | 203.2678  |
| 39   | 1      | 38     | 38    | 2       | 37      | A    | 0           | 207490.514   | -0.018                     | 203.2678  |
| 39   | 2      | 38     | 38    | 1       | 37      | A    | 0           | 207490.514   | -0.018                     | 203.2678  |
| 39   | 2      | 38     | 38    | 2       | 37      | A    | 0           | 207490.514   | -0.018                     | 203.2678  |
| 34   | 6      | 28     | 33    | 6       | 27      | A    | 1           | 207537.070   | 0.072                      | 321.9041  |
| 53   | 7      | 46     | 53    | 6       | 47      | E    | 0           | 207552.857   | 0.041                      | 363.9358  |
| 53   | 8      | 46     | 53    | 7       | 47      | E    | 0           | 207552.857   | -0.057                     | 363.9358  |
| 53   | 7      | 46     | 53    | 6       | 47      | A    | 0           | 207570.675   | 0.037                      | 363.9312  |
| 53   | 8      | 46     | 53    | 7       | 47      | A    | 0           | 207570.675   | -0.062                     | 363.9312  |
| 40   | 0      | 40     | 39    | 0       | 39      | A    | 1           | 207620.845   | 0.079                      | 332.6172  |
| 40   | 0      | 40     | 39    | 1       | 39      | A    | 1           | 207620.845   | 0.079                      | 332.6172  |
| 40   | 1      | 40     | 39    | 0       | 39      | A    | 1           | 207620.845   | 0.079                      | 332.6172  |
| 40   | 1      | 40     | 39    | 1       | 39      | A    | 1           | 207620.845   | 0.079                      | 332.6172  |
| 40   | 0      | 40     | 39    | 0       | 39      | E    | 1           | 207632.079   | -0.015                     | 332.2497  |
| 40   | 1      | 40     | 39    | 1       | 39      | E    | 1           | 207632.079   | -0.015                     | 332.2497  |
| 40   | 0      | 40     | 39    | 0       | 39      | A    | 0           | 207683.523   | -0.181                     | 203.9340  |
| 40   | 0      | 40     | 39    | 1       | 39      | A    | 0           | 207683.523   | -0.181                     | 203.9340  |
| 40   | 1      | 40     | 39    | 0       | 39      | A    | 0           | 207683.523   | -0.181                     | 203.9340  |
| 40   | 1      | 40     | 39    | 1       | 39      | A    | 0           | 207683.523   | -0.181                     | 203.9340  |
| 40   | 0      | 40     | 39    | 0       | 39      | E    | 0           | 207683.523   | 0.174                      | 203.9454  |
| 40   | 1      | 40     | 39    | 1       | 39      | E    | 0           | 207683.523   | 0.174                      | 203.9454  |
| 34   | 6      | 28     | 33    | 6       | 27      | A    | 0           | 207755.149   | 0.000                      | 193.3213  |
| 48   | 4      | 44     | 48    | 3       | 45      | A    | 1           | 207765.940   | 0.252                      | 423.4455  |
| 48   | 5      | 44     | 48    | 4       | 45      | A    | 1           | 207765.940   | 0.252                      | 423.4455  |
| 33   | 12     | 22     | 32    | 12      | 21      | A    | 0           | 207778.346   | -0.010                     | 204.0694  |
| 33   | 12     | 22     | 32    | 12      | 21      | E    | 0           | 207803.130   | 0.006                      | 204.0667  |
| 33   | 12     | 21     | 32    | 12      | 20      | E    | 0           | 207808.652   | -0.115                     | 204.0796  |
| 33   | 12     | 21     | 32    | 12      | 20      | A    | 0           | 207827.503   | -0.023                     | 204.0709  |



| $J'$ | $K'_a$ | $K'_c$ | $J''$ | $K''_a$ | $K''_c$ | Sym. | $v_{tCH_3}$ | $\nu_{Obs.}$ | $\nu_{Obs.} - \nu_{Calc.}$ | $E_{low}$ |
|------|--------|--------|-------|---------|---------|------|-------------|--------------|----------------------------|-----------|
| 38   | 19     | 20     | 38    | 18      | 21      | E    | 0           | 207857.496   | 0.029                      | 281.7404  |
| 38   | 19     | 20     | 38    | 18      | 21      | A    | 0           | 207883.244   | 0.003                      | 281.7515  |
| 38   | 19     | 19     | 38    | 18      | 20      | A    | 0           | 207883.244   | 0.003                      | 281.7515  |
| 55   | 20     | 35     | 55    | 19      | 36      | E    | 0           | 207947.442   | -0.037                     | 455.6435  |
| 55   | 20     | 36     | 55    | 19      | 37      | E    | 0           | 207967.641   | -0.006                     | 455.6328  |
| 55   | 20     | 35     | 55    | 19      | 36      | A    | 0           | 207991.867   | 0.033                      | 455.6429  |
| 55   | 20     | 36     | 55    | 19      | 37      | A    | 0           | 208006.432   | -0.027                     | 455.6424  |
| 34   | 7      | 28     | 33    | 6       | 27      | A    | 1           | 208159.322   | 0.092                      | 321.9041  |
| 37   | 19     | 18     | 37    | 18      | 19      | E    | 0           | 208220.707   | -0.021                     | 273.8656  |
| 37   | 19     | 19     | 37    | 18      | 20      | E    | 0           | 208244.052   | 0.056                      | 273.8537  |
| 37   | 19     | 19     | 37    | 18      | 20      | A    | 0           | 208269.388   | -0.012                     | 273.8649  |
| 37   | 19     | 18     | 37    | 18      | 19      | A    | 0           | 208269.388   | -0.012                     | 273.8649  |
| 34   | 7      | 28     | 33    | 6       | 27      | E    | 0           | 208412.757   | -0.011                     | 193.3292  |
| 34   | 7      | 28     | 33    | 6       | 27      | A    | 0           | 208421.941   | 0.006                      | 193.3213  |
| 34   | 7      | 28     | 33    | 6       | 27      | E    | 1           | 208440.984   | 0.035                      | 321.6522  |
| 57   | 9      | 48     | 57    | 8       | 49      | E    | 1           | 208528.987   | 0.255                      | 549.4007  |
| 57   | 10     | 48     | 57    | 9       | 49      | E    | 1           | 208530.931   | 0.248                      | 549.4007  |
| 36   | 19     | 17     | 36    | 18      | 18      | E    | 0           | 208575.430   | -0.034                     | 266.1927  |
| 48   | 4      | 44     | 48    | 3       | 45      | E    | 0           | 208580.727   | 0.006                      | 294.8964  |
| 48   | 5      | 44     | 48    | 4       | 45      | E    | 0           | 208580.727   | 0.006                      | 294.8964  |
| 36   | 19     | 18     | 36    | 18      | 19      | E    | 0           | 208598.856   | -0.123                     | 266.1807  |
| 48   | 4      | 44     | 48    | 3       | 45      | A    | 0           | 208608.497   | 0.119                      | 294.8888  |
| 48   | 5      | 44     | 48    | 4       | 45      | A    | 0           | 208608.497   | 0.119                      | 294.8888  |
| 36   | 19     | 18     | 36    | 18      | 19      | A    | 0           | 208624.024   | -0.019                     | 266.1920  |
| 36   | 19     | 17     | 36    | 18      | 18      | A    | 0           | 208624.024   | -0.019                     | 266.1920  |
| 48   | 4      | 44     | 48    | 3       | 45      | E    | 1           | 208662.962   | -0.102                     | 423.2016  |
| 48   | 5      | 44     | 48    | 4       | 45      | E    | 1           | 208662.962   | -0.102                     | 423.2016  |
| 64   | 21     | 43     | 64    | 20      | 44      | A    | 0           | 208835.970   | -0.039                     | 576.6625  |
| 64   | 21     | 43     | 64    | 20      | 44      | E    | 0           | 208855.885   | -0.091                     | 576.6601  |
| 35   | 19     | 16     | 35    | 18      | 17      | E    | 0           | 208900.691   | -0.042                     | 258.7329  |
| 33   | 11     | 23     | 32    | 11      | 22      | A    | 0           | 208911.485   | -0.016                     | 199.9640  |
| 35   | 19     | 17     | 35    | 18      | 18      | E    | 0           | 208924.501   | 0.027                      | 258.7209  |
| 33   | 11     | 23     | 32    | 11      | 22      | E    | 0           | 208939.853   | 0.039                      | 199.9665  |
| 35   | 19     | 17     | 35    | 18      | 18      | A    | 0           | 208949.168   | -0.058                     | 258.7323  |
| 35   | 19     | 16     | 35    | 18      | 17      | A    | 0           | 208949.168   | -0.058                     | 258.7323  |
| 54   | 20     | 34     | 54    | 19      | 35      | E    | 0           | 209135.045   | -0.008                     | 444.0587  |
| 54   | 20     | 35     | 54    | 19      | 36      | E    | 0           | 209155.758   | -0.040                     | 444.0480  |
| 54   | 20     | 34     | 54    | 19      | 35      | A    | 0           | 209182.492   | 0.016                      | 444.0582  |
| 54   | 20     | 35     | 54    | 19      | 36      | A    | 0           | 209189.880   | -0.164                     | 444.0579  |
| 34   | 19     | 15     | 34    | 18      | 16      | E    | 0           | 209198.417   | -0.047                     | 251.4858  |
| 64   | 21     | 44     | 64    | 20      | 45      | A    | 0           | 209200.647   | -0.020                     | 576.6487  |
| 34   | 19     | 16     | 34    | 18      | 17      | E    | 0           | 209222.467   | 0.057                      | 251.4738  |
| 34   | 19     | 16     | 34    | 18      | 17      | A    | 0           | 209246.849   | -0.028                     | 251.4852  |
| 34   | 19     | 15     | 34    | 18      | 16      | A    | 0           | 209246.849   | -0.028                     | 251.4852  |
| 33   | 11     | 22     | 32    | 11      | 21      | E    | 0           | 209328.811   | 0.025                      | 199.9874  |
| 33   | 11     | 22     | 32    | 11      | 21      | A    | 0           | 209349.292   | -0.028                     | 199.9810  |
| 33   | 19     | 14     | 33    | 18      | 15      | E    | 0           | 209470.398   | -0.073                     | 244.4510  |
| 33   | 19     | 15     | 33    | 18      | 16      | E    | 0           | 209494.594   | -0.007                     | 244.4390  |
| 33   | 19     | 15     | 33    | 18      | 16      | A    | 0           | 209518.807   | 0.001                      | 244.4504  |
| 33   | 19     | 14     | 33    | 18      | 15      | A    | 0           | 209518.807   | 0.001                      | 244.4504  |
| 45   | 2      | 43     | 45    | 1       | 44      | E    | 0           | 209553.206   | 0.136                      | 255.3180  |
| 45   | 3      | 43     | 45    | 2       | 44      | E    | 0           | 209553.206   | 0.136                      | 255.3180  |
| 33   | 9      | 25     | 32    | 9       | 24      | A    | 0           | 209553.207   | -0.106                     | 193.0397  |
| 33   | 9      | 25     | 32    | 9       | 24      | E    | 0           | 209553.207   | -0.037                     | 193.0466  |
| 45   | 2      | 43     | 45    | 1       | 44      | A    | 0           | 209587.589   | 0.155                      | 255.3080  |
| 45   | 3      | 43     | 45    | 2       | 44      | A    | 0           | 209587.589   | 0.155                      | 255.3080  |
| 32   | 19     | 13     | 32    | 18      | 14      | E    | 0           | 209718.417   | -0.038                     | 237.6279  |
| 45   | 2      | 43     | 45    | 1       | 44      | E    | 1           | 209720.685   | -0.090                     | 383.6187  |
| 45   | 3      | 43     | 45    | 2       | 44      | E    | 1           | 209720.685   | -0.090                     | 383.6187  |
| 32   | 19     | 14     | 32    | 18      | 15      | E    | 0           | 209742.802   | 0.047                      | 237.6158  |
| 32   | 9      | 23     | 31    | 9       | 22      | A    | 0           | 209830.871   | -0.004                     | 186.7082  |
| 32   | 9      | 23     | 31    | 9       | 22      | E    | 0           | 209838.927   | -0.006                     | 186.7160  |
| 33   | 10     | 24     | 32    | 10      | 23      | A    | 0           | 209896.555   | -0.037                     | 196.3134  |
| 33   | 10     | 24     | 32    | 10      | 23      | E    | 0           | 209901.878   | 0.015                      | 196.3190  |
| 31   | 19     | 12     | 31    | 18      | 13      | E    | 0           | 209943.994   | -0.037                     | 231.0160  |
| 31   | 19     | 13     | 31    | 18      | 14      | E    | 0           | 209968.517   | 0.035                      | 231.0040  |
| 31   | 19     | 13     | 31    | 18      | 14      | A    | 0           | 209992.227   | -0.001                     | 231.0155  |
| 31   | 19     | 12     | 31    | 18      | 13      | A    | 0           | 209992.227   | -0.001                     | 231.0155  |
| 34   | 22     | 12     | 33    | 22      | 11      | A    | 0           | 210023.998   | -0.102                     | 274.7493  |
| 34   | 22     | 13     | 33    | 22      | 12      | A    | 0           | 210023.998   | -0.102                     | 274.7493  |
| 34   | 22     | 12     | 33    | 22      | 11      | E    | 0           | 210024.893   | -0.011                     | 274.7436  |
| 30   | 19     | 11     | 30    | 18      | 12      | E    | 0           | 210148.652   | -0.065                     | 224.6151  |
| 30   | 19     | 12     | 30    | 18      | 13      | E    | 0           | 210173.320   | 0.017                      | 224.6030  |
| 50   | 5      | 45     | 50    | 4       | 46      | E    | 0           | 210200.975   | -0.011                     | 320.2795  |
| 50   | 6      | 45     | 50    | 5       | 46      | E    | 0           | 210200.975   | -0.013                     | 320.2795  |
| 50   | 5      | 45     | 50    | 4       | 46      | A    | 0           | 210225.586   | 0.013                      | 320.2730  |
| 50   | 6      | 45     | 50    | 5       | 46      | A    | 0           | 210225.586   | 0.011                      | 320.2730  |
| 53   | 20     | 33     | 53    | 19      | 34      | E    | 0           | 210236.404   | -0.074                     | 432.6988  |
| 50   | 5      | 45     | 50    | 4       | 46      | E    | 1           | 210240.911   | -0.067                     | 448.5838  |
| 50   | 6      | 45     | 50    | 5       | 46      | E    | 1           | 210240.911   | -0.069                     | 448.5838  |
| 53   | 20     | 34     | 53    | 19      | 35      | E    | 0           | 210257.925   | -0.021                     | 432.6881  |
| 53   | 20     | 33     | 53    | 19      | 34      | A    | 0           | 210285.506   | 0.070                      | 432.6984  |
| 53   | 20     | 34     | 53    | 19      | 35      | A    | 0           | 210289.185   | -0.095                     | 432.6983  |
| 29   | 19     | 10     | 29    | 18      | 11      | E    | 0           | 210333.921   | -0.032                     | 218.4245  |
| 29   | 19     | 11     | 29    | 18      | 12      | E    | 0           | 210358.672   | 0.011                      | 218.4125  |
| 29   | 19     | 11     | 29    | 18      | 12      | A    | 0           | 210382.003   | -0.027                     | 218.4241  |
| 29   | 19     | 10     | 29    | 18      | 11      | A    | 0           | 210382.003   | -0.027                     | 218.4241  |
| 34   | 20     | 14     | 33    | 20      | 13      | A    | 0           | 210395.254   | -0.057                     | 258.8199  |
| 34   | 20     | 15     | 33    | 20      | 14      | A    | 0           | 210395.254   | -0.057                     | 258.8199  |
| 34   | 20     | 14     | 33    | 20      | 13      | E    | 0           | 210396.297   | 0.022                      | 258.8173  |
| 28   | 19     | 9      | 28    | 18      | 10      | E    | 0           | 210501.059   | -0.045                     | 212.4440  |
| 28   | 19     | 10     | 28    | 18      | 11      | E    | 0           | 210525.952   | 0.031                      | 212.4319  |
| 28   | 19     | 10     | 28    | 18      | 11      | A    | 0           | 210549.104   | -0.023                     | 212.4436  |
| 28   | 19     | 9      | 28    | 18      | 10      | A    | 0           | 210549.104   | -0.023                     | 212.4436  |
| 34   | 19     | 16     | 33    | 19      | 15      | A    | 0           | 210626.542   | -0.086                     | 251.4392  |
| 34   | 19     | 15     | 33    | 19      | 14      | A    | 0           | 210626.542   | -0.086                     | 251.4392  |
| 34   | 19     | 16     | 33    | 19      | 15      | E    | 0           | 210627.738   | -0.083                     | 251.4270  |
| 33   | 7      | 26     | 32    | 7       | 25      | A    | 0           | 210637.668   | -0.030                     | 189.5115  |
| 27   | 19     | 8      | 27    | 18      | 9       | E    | 0           | 210651.422   | -0.042                     | 206.6731  |
| 33   | 7      | 26     | 32    | 7       | 25      | E    | 1           | 210669.640   | 0.059                      | 317.8320  |
| 27   | 19     | 9      | 27    | 18      | 10      | E    | 0           | 210676.426   | 0.049                      | 206.6611  |
| 27   | 19     | 9      | 27    | 18      | 10      | A    | 0           | 210699.344   | -0.091                     | 206.6727  |
| 27   | 19     | 8      | 27    | 18      | 9       | A    | 0           | 210699.344   | -0.091                     | 206.6727  |
| 47   | 3      | 44     | 47    | 2       | 45      | A    | 1           | 210773.535   | -0.033                     | 407.6290  |
| 47   | 4      | 44     | 47    | 3       | 45      | A    | 1           | 210773.535   | -0.033                     | 407.6290  |
| 26   | 19     | 7      | 26    | 18      | 8       | E    | 0           | 210786.201   | -0.058                     | 201.1116  |
| 26   | 19     | 8      | 26    | 18      | 9       | E    | 0           | 210811.441   | 0.183                      | 201.0995  |
| 63   | 21     | 42     | 63    | 20      | 43      | A    | 0           | 210814.449   | -0.034                     | 563.0649  |
| 63   | 21     | 42     | 63    | 20      | 43      | E    | 0           | 210823.216   | -0.050                     | 563.0629  |
| 26   | 19     | 8      | 26    | 18      | 9       | A    | 0           | 210834.159   | -0.025                     | 201.1112  |
| 26   | 19     | 7      | 26    | 18      | 8       | A    | 0           | 210834.159   | -0.025                     | 201.1112  |
| 34   | 18     | 16     | 33    | 18      | 15      | A    | 0           | 210898.535   | -0.022                     | 244.4504  |
| 34   | 18     | 17     | 33    | 18      | 16      | A    | 0           | 210898.535   | -0.022                     | 244.4504  |
| 34   | 18     | 16     | 33    | 18      | 15      | E    | 0           | 210899.806   | 0.129                      | 244.4510  |
| 25   | 19     | 6      | 25    | 18      | 7       | E    | 0           | 210906.603   | -0.057                     | 195.7589  |
| 63   | 21     | 43     | 63    | 20      | 44      | E    | 0           | 210926.578   | -0.050                     | 563.0506  |



| $J'$ | $K'_a$ | $K'_c$ | $J''$ | $K''_a$ | $K''_c$ | Sym. | $v_{tCH_3}$ | $\nu_{Obs.}$ | $\nu_{Obs.} - \nu_{Calc.}$ | $E_{low}$ |
|------|--------|--------|-------|---------|---------|------|-------------|--------------|----------------------------|-----------|
| 25   | 19     | 7      | 25    | 18      | 8       | E    | 0           | 210931.888   | 0.154                      | 195.7469  |
| 25   | 19     | 7      | 25    | 18      | 8       | A    | 0           | 210954.470   | -0.070                     | 195.7586  |
| 25   | 19     | 6      | 25    | 18      | 7       | A    | 0           | 210954.470   | -0.070                     | 195.7586  |
| 24   | 19     | 5      | 24    | 18      | 6       | E    | 0           | 211013.762   | -0.010                     | 190.6149  |
| 63   | 21     | 43     | 63    | 20      | 44      | A    | 0           | 211023.814   | -0.017                     | 563.0570  |
| 24   | 19     | 6      | 24    | 18      | 7       | E    | 0           | 211038.958   | 0.045                      | 190.6028  |
| 24   | 19     | 6      | 24    | 18      | 7       | A    | 0           | 211061.614   | 0.004                      | 190.6145  |
| 24   | 19     | 5      | 24    | 18      | 6       | A    | 0           | 211061.614   | 0.004                      | 190.6145  |
| 23   | 19     | 5      | 23    | 18      | 6       | A    | 0           | 211156.397   | -0.054                     | 185.6788  |
| 23   | 19     | 4      | 23    | 18      | 5       | A    | 0           | 211156.397   | -0.054                     | 185.6788  |
| 22   | 19     | 3      | 22    | 18      | 4       | E    | 0           | 211192.245   | -0.052                     | 180.9513  |
| 34   | 17     | 18     | 33    | 17      | 17      | A    | 0           | 211222.007   | -0.032                     | 237.8562  |
| 34   | 17     | 17     | 33    | 17      | 16      | A    | 0           | 211222.007   | -0.032                     | 237.8562  |
| 34   | 17     | 17     | 33    | 17      | 16      | E    | 0           | 211223.200   | -0.030                     | 237.8584  |
| 34   | 17     | 18     | 33    | 17      | 17      | E    | 0           | 211223.835   | 0.029                      | 237.8457  |
| 22   | 19     | 4      | 22    | 18      | 5       | A    | 0           | 211240.108   | 0.046                      | 180.9510  |
| 22   | 19     | 3      | 22    | 18      | 4       | A    | 0           | 211240.108   | 0.046                      | 180.9510  |
| 52   | 20     | 32     | 52    | 19      | 33      | E    | 0           | 211258.819   | -0.024                     | 421.5628  |
| 52   | 20     | 33     | 52    | 19      | 34      | E    | 0           | 211280.967   | -0.060                     | 421.5520  |
| 13   | 12     | 2      | 12    | 11      | 2       | E    | 0           | 211392.704   | 0.025                      | 106.3275  |
| 13   | 12     | 1      | 12    | 11      | 1       | E    | 0           | 211404.171   | -0.066                     | 106.3406  |
| 13   | 12     | 1      | 12    | 11      | 2       | A    | 0           | 211438.421   | 0.032                      | 106.3305  |
| 13   | 12     | 2      | 12    | 11      | 1       | A    | 0           | 211438.421   | 0.032                      | 106.3305  |
| 21   | 8      | 14     | 20    | 7       | 13      | E    | 0           | 211536.094   | -0.061                     | 120.2451  |
| 52   | 6      | 46     | 52    | 5       | 47      | E    | 1           | 211557.528   | -0.010                     | 475.0355  |
| 52   | 7      | 46     | 52    | 6       | 47      | E    | 1           | 211557.528   | -0.021                     | 475.0355  |
| 52   | 6      | 46     | 52    | 5       | 47      | E    | 0           | 211560.613   | 0.001                      | 346.7335  |
| 52   | 7      | 46     | 52    | 6       | 47      | E    | 0           | 211560.613   | -0.009                     | 346.7335  |
| 52   | 6      | 46     | 52    | 5       | 47      | A    | 0           | 211582.093   | 0.015                      | 346.7281  |
| 52   | 7      | 46     | 52    | 6       | 47      | A    | 0           | 211582.093   | 0.005                      | 346.7281  |
| 34   | 16     | 18     | 33    | 16      | 17      | A    | 0           | 211612.230   | -0.038                     | 231.6602  |
| 34   | 16     | 19     | 33    | 16      | 18      | A    | 0           | 211612.230   | -0.036                     | 231.6602  |
| 34   | 16     | 18     | 33    | 16      | 17      | E    | 0           | 211613.419   | -0.104                     | 231.6640  |
| 34   | 16     | 19     | 33    | 16      | 18      | E    | 0           | 211614.385   | -0.033                     | 231.6509  |
| 21   | 8      | 14     | 20    | 7       | 13      | A    | 0           | 211642.801   | 0.024                      | 120.2360  |
| 47   | 3      | 44     | 47    | 3       | 45      | E    | 0           | 211667.946   | 0.025                      | 279.0455  |
| 47   | 4      | 44     | 47    | 3       | 45      | E    | 0           | 211667.946   | 0.025                      | 279.0455  |
| 47   | 3      | 44     | 47    | 2       | 45      | E    | 1           | 211794.091   | -0.107                     | 407.3482  |
| 47   | 4      | 44     | 47    | 3       | 45      | E    | 1           | 211794.091   | -0.107                     | 407.3482  |
| 35   | 6      | 29     | 34    | 7       | 28      | A    | 1           | 211846.529   | 0.051                      | 328.8475  |
| 32   | 8      | 24     | 31    | 8       | 23      | E    | 0           | 211972.264   | -0.107                     | 184.6277  |
| 35   | 6      | 29     | 34    | 7       | 28      | E    | 0           | 212009.365   | -0.090                     | 200.2811  |
| 35   | 6      | 29     | 34    | 7       | 28      | A    | 0           | 212013.073   | -0.026                     | 200.2735  |
| 36   | 5      | 31     | 35    | 6       | 30      | A    | 1           | 212027.919   | 0.032                      | 331.7960  |
| 37   | 4      | 33     | 36    | 5       | 32      | A    | 1           | 212040.863   | 0.046                      | 334.2332  |
| 37   | 5      | 33     | 36    | 4       | 32      | A    | 1           | 212042.191   | -0.013                     | 334.2332  |
| 36   | 6      | 31     | 35    | 6       | 30      | A    | 1           | 212043.984   | -0.022                     | 331.7960  |
| 36   | 5      | 31     | 35    | 5       | 30      | A    | 1           | 212057.665   | 0.083                      | 331.7950  |
| 34   | 15     | 20     | 33    | 15      | 19      | A    | 0           | 212073.708   | 0.007                      | 331.7950  |
| 34   | 15     | 19     | 33    | 15      | 18      | E    | 0           | 212091.097   | 0.000                      | 225.8675  |
| 34   | 15     | 20     | 33    | 15      | 19      | E    | 0           | 212092.403   | -0.021                     | 225.8728  |
|      |        |        |       |         |         |      |             | 212093.708   | -0.037                     | 225.8594  |
| 38   | 3      | 35     | 37    | 3       | 34      | A    | 1           | 212154.489   | -0.020                     | 336.2020  |
| 38   | 3      | 35     | 37    | 4       | 34      | A    | 1           | 212154.489   | -0.001                     | 336.2020  |
| 38   | 4      | 35     | 37    | 3       | 34      | A    | 1           | 212154.489   | -0.029                     | 336.2020  |
| 38   | 4      | 35     | 37    | 4       | 34      | A    | 1           | 212154.489   | -0.011                     | 336.2020  |
| 37   | 5      | 33     | 36    | 4       | 32      | E    | 1           | 212160.148   | 0.071                      | 333.9741  |
| 36   | 5      | 31     | 35    | 6       | 30      | E    | 1           | 212170.573   | -0.022                     | 331.5485  |
| 37   | 4      | 33     | 36    | 5       | 32      | E    | 0           | 212189.283   | -0.053                     | 205.6499  |
| 37   | 5      | 33     | 36    | 4       | 32      | E    | 0           | 212190.784   | -0.076                     | 205.6498  |
| 37   | 4      | 33     | 36    | 5       | 32      | A    | 0           | 212192.932   | -0.022                     | 205.6418  |
| 37   | 5      | 33     | 36    | 4       | 32      | A    | 0           | 212194.470   | -0.016                     | 205.6417  |
| 36   | 5      | 31     | 35    | 6       | 30      | E    | 0           | 212195.777   | -0.096                     | 203.2233  |
| 36   | 5      | 31     | 35    | 6       | 30      | A    | 0           | 212200.227   | -0.023                     | 203.2156  |
| 36   | 5      | 31     | 35    | 5       | 30      | E    | 1           | 212204.359   | -0.047                     | 331.5474  |
| 51   | 20     | 31     | 51    | 19      | 32      | E    | 0           | 212208.355   | 0.005                      | 410.6496  |
| 36   | 6      | 31     | 35    | 6       | 30      | E    | 0           | 212213.384   | 0.013                      | 203.2233  |
| 34   | 8      | 27     | 33    | 8       | 26      | E    | 0           | 212213.384   | -0.058                     | 196.8119  |
| 36   | 6      | 31     | 35    | 6       | 30      | A    | 0           | 212217.789   | -0.043                     | 203.2156  |
| 34   | 8      | 27     | 33    | 8       | 26      | A    | 0           | 212217.789   | 0.036                      | 196.8045  |
| 36   | 6      | 31     | 35    | 5       | 30      | E    | 1           | 212222.852   | -0.024                     | 331.5474  |
| 36   | 5      | 31     | 35    | 5       | 30      | E    | 0           | 212227.922   | -0.077                     | 203.2222  |
| 70   | 22     | 48     | 70    | 21      | 49      | A    | 0           | 212231.243   | 0.690                      | 669.7276  |
| 51   | 20     | 32     | 51    | 19      | 33      | E    | 0           | 212231.243   | 0.037                      | 410.6388  |
| 36   | 5      | 31     | 35    | 5       | 30      | A    | 0           | 212232.492   | -0.031                     | 203.2145  |
| 15   | 11     | 5      | 14    | 10      | 5       | E    | 0           | 212235.745   | 0.031                      | 107.8832  |
| 36   | 6      | 31     | 35    | 5       | 30      | E    | 0           | 212245.516   | 0.019                      | 203.2222  |
| 38   | 3      | 35     | 37    | 3       | 34      | E    | 1           | 212246.910   | -0.041                     | 335.9251  |
| 38   | 3      | 35     | 37    | 4       | 34      | E    | 1           | 212246.910   | -0.019                     | 335.9251  |
| 38   | 4      | 35     | 37    | 3       | 34      | E    | 1           | 212246.910   | -0.052                     | 335.9251  |
| 38   | 4      | 35     | 37    | 4       | 34      | E    | 1           | 212246.910   | -0.030                     | 335.9251  |
| 36   | 6      | 31     | 35    | 5       | 30      | A    | 0           | 212250.093   | -0.011                     | 203.2145  |
| 15   | 11     | 4      | 14    | 10      | 4       | E    | 0           | 212252.596   | -0.050                     | 107.8958  |
| 51   | 20     | 31     | 51    | 19      | 32      | A    | 0           | 212258.240   | 0.008                      | 410.6494  |
| 51   | 20     | 32     | 51    | 19      | 33      | A    | 0           | 212259.090   | -0.079                     | 410.6494  |
| 38   | 3      | 35     | 37    | 3       | 34      | E    | 0           | 212283.104   | -0.066                     | 207.6036  |
| 38   | 4      | 35     | 37    | 4       | 34      | E    | 0           | 212283.104   | -0.056                     | 207.6036  |
| 38   | 3      | 35     | 37    | 3       | 34      | A    | 0           | 212286.006   | -0.005                     | 207.5950  |
| 38   | 3      | 35     | 37    | 4       | 34      | A    | 0           | 212286.006   | 0.016                      | 207.5950  |
| 38   | 4      | 35     | 37    | 3       | 34      | A    | 0           | 212286.006   | -0.015                     | 207.5950  |
| 38   | 4      | 35     | 37    | 4       | 34      | A    | 0           | 212286.006   | 0.006                      | 207.5950  |
| 39   | 2      | 37     | 38    | 2       | 36      | A    | 1           | 212327.445   | -0.014                     | 337.7314  |
| 39   | 2      | 37     | 38    | 3       | 36      | A    | 1           | 212327.445   | -0.014                     | 337.7314  |
| 39   | 3      | 37     | 38    | 3       | 36      | A    | 1           | 212327.445   | -0.014                     | 337.7314  |
| 39   | 2      | 37     | 38    | 2       | 36      | E    | 1           | 212394.628   | -0.034                     | 337.4307  |
| 39   | 2      | 37     | 38    | 3       | 36      | E    | 1           | 212394.628   | -0.034                     | 337.4307  |
| 39   | 3      | 37     | 38    | 2       | 36      | E    | 1           | 212394.628   | -0.034                     | 337.4307  |
| 39   | 3      | 37     | 38    | 3       | 36      | E    | 1           | 212394.628   | -0.034                     | 337.4307  |
| 35   | 7      | 29     | 34    | 7       | 28      | E    | 0           | 212397.218   | -0.007                     | 200.2811  |
| 35   | 7      | 29     | 34    | 7       | 28      | A    | 0           | 212402.411   | -0.017                     | 200.2735  |
| 39   | 2      | 37     | 38    | 2       | 36      | E    | 0           | 212435.935   | -0.009                     | 209.1138  |
| 39   | 3      | 37     | 38    | 3       | 36      | E    | 0           | 212435.935   | -0.009                     | 209.1138  |
| 39   | 2      | 37     | 38    | 2       | 36      | A    | 0           | 212437.993   | -0.014                     | 209.1044  |
| 39   | 2      | 37     | 38    | 3       | 36      | A    | 0           | 212437.993   | -0.014                     | 209.1044  |
| 39   | 3      | 37     | 38    | 2       | 36      | A    | 0           | 212437.993   | -0.014                     | 209.1044  |
| 39   | 3      | 37     | 38    | 3       | 36      | A    | 0           | 212437.993   | -0.014                     | 209.1044  |
| 35   | 6      | 29     | 34    | 6       | 28      | A    | 1           | 212468.761   | 0.050                      | 328.8268  |
| 40   | 1      | 39     | 39    | 1       | 38      | A    | 1           | 212530.571   | 0.011                      | 338.8405  |
| 40   | 1      | 39     | 39    | 2       | 38      | A    | 1           | 212530.571   | 0.011                      | 338.8405  |
| 40   | 2      | 39     | 39    | 1       | 38      | A    | 1           | 212530.571   | 0.011                      | 338.8405  |
| 40   | 2      | 39     | 39    | 2       | 38      | A    | 1           | 212530.571   | 0.011                      | 338.8405  |
| 33   | 10     | 23     | 32    | 10      | 22      | A    | 0           | 212543.945   | -0.028                     | 196.4477  |
| 33   | 10     | 23     | 32    | 10      | 22      | E    | 0           | 212549.438   | -0.007                     | 196.4541  |
| 40   | 1      | 39     | 39    | 1       | 38      | E    | 1           | 212571.064   | -0.004                     | 338.5099  |
| 40   | 1      | 39     | 39    | 2       | 38      | E    | 1           | 212571.064   | -0.004                     | 338.5099  |



| $J'$ | $K'_a$ | $K'_c$ | $J''$ | $K''_a$ | $K''_c$ | Sym. | $v_{tCH_3}$ | $\nu_{Obs.}$ | $\nu_{Obs.} - \nu_{Calc.}$ | $E_{low}$ |
|------|--------|--------|-------|---------|---------|------|-------------|--------------|----------------------------|-----------|
| 40   | 2      | 39     | 39    | 1       | 38      | E    | 1           | 212571.064   | -0.004                     | 338.5099  |
| 40   | 2      | 39     | 39    | 2       | 38      | E    | 1           | 212571.064   | -0.004                     | 338.5099  |
| 54   | 7      | 47     | 54    | 6       | 48      | E    | 1           | 212596.031   | 0.064                      | 502.5495  |
| 54   | 8      | 47     | 54    | 7       | 48      | E    | 1           | 212596.031   | 0.008                      | 502.5495  |
| 62   | 21     | 41     | 62    | 20      | 42      | E    | 0           | 212602.936   | -0.019                     | 549.7007  |
| 62   | 21     | 41     | 62    | 20      | 42      | A    | 0           | 212611.405   | 0.044                      | 549.7021  |
| 40   | 1      | 39     | 39    | 1       | 38      | E    | 0           | 212617.689   | 0.009                      | 210.1992  |
| 40   | 2      | 39     | 39    | 2       | 38      | E    | 0           | 212617.689   | 0.009                      | 210.1992  |
| 40   | 1      | 39     | 39    | 1       | 38      | A    | 0           | 212618.903   | -0.022                     | 210.1889  |
| 40   | 1      | 39     | 39    | 2       | 38      | A    | 0           | 212618.903   | -0.022                     | 210.1889  |
| 40   | 2      | 39     | 39    | 1       | 38      | A    | 0           | 212618.903   | -0.022                     | 210.1889  |
| 40   | 2      | 39     | 39    | 2       | 38      | A    | 0           | 212618.903   | -0.022                     | 210.1889  |
| 54   | 7      | 47     | 54    | 6       | 48      | E    | 0           | 212642.755   | 0.005                      | 374.2517  |
| 54   | 8      | 47     | 54    | 7       | 48      | E    | 0           | 212642.755   | -0.046                     | 374.2517  |
| 54   | 7      | 47     | 54    | 6       | 48      | A    | 0           | 212661.046   | -0.012                     | 374.2472  |
| 54   | 8      | 47     | 54    | 7       | 48      | A    | 0           | 212661.046   | -0.064                     | 374.2472  |
| 35   | 6      | 29     | 34    | 6       | 28      | E    | 0           | 212673.667   | -0.039                     | 200.2589  |
| 35   | 6      | 29     | 34    | 6       | 28      | A    | 0           | 212679.879   | -0.007                     | 200.2513  |
| 34   | 14     | 21     | 33    | 14      | 20      | A    | 0           | 212691.247   | -0.036                     | 220.4852  |
| 34   | 14     | 20     | 33    | 14      | 19      | A    | 0           | 212691.749   | -0.177                     | 220.4852  |
| 34   | 14     | 20     | 33    | 14      | 19      | E    | 0           | 212692.945   | -0.005                     | 220.4919  |
| 34   | 14     | 21     | 33    | 14      | 20      | E    | 0           | 212694.843   | -0.012                     | 220.4786  |
| 62   | 21     | 42     | 62    | 20      | 43      | A    | 0           | 212729.488   | -0.012                     | 549.6976  |
| 41   | 0      | 41     | 40    | 0       | 40      | A    | 1           | 212748.299   | 0.067                      | 339.5427  |
| 41   | 0      | 41     | 40    | 1       | 40      | A    | 1           | 212748.299   | 0.067                      | 339.5427  |
| 41   | 1      | 41     | 40    | 0       | 40      | A    | 1           | 212748.299   | 0.067                      | 339.5427  |
| 41   | 1      | 41     | 40    | 1       | 40      | A    | 1           | 212748.299   | 0.067                      | 339.5427  |
| 41   | 0      | 41     | 40    | 0       | 40      | E    | 1           | 212759.449   | -0.016                     | 339.1756  |
| 41   | 1      | 41     | 40    | 1       | 40      | E    | 1           | 212759.449   | -0.016                     | 339.1756  |
| 41   | 0      | 41     | 40    | 0       | 40      | A    | 0           | 212812.245   | -0.186                     | 210.8615  |
| 41   | 0      | 41     | 40    | 1       | 40      | A    | 0           | 212812.245   | -0.186                     | 210.8615  |
| 41   | 1      | 41     | 40    | 0       | 40      | A    | 0           | 212812.245   | -0.186                     | 210.8615  |
| 41   | 1      | 41     | 40    | 1       | 40      | A    | 0           | 212812.245   | -0.186                     | 210.8615  |
| 41   | 0      | 41     | 40    | 0       | 40      | E    | 0           | 212812.245   | 0.166                      | 210.8729  |
| 41   | 1      | 41     | 40    | 1       | 40      | E    | 0           | 212812.245   | 0.166                      | 210.8729  |
| 35   | 7      | 29     | 34    | 6       | 28      | A    | 1           | 212830.799   | 0.076                      | 328.8268  |
| 17   | 10     | 8      | 16    | 9       | 8       | E    | 0           | 212974.854   | -0.026                     | 110.6801  |
| 17   | 10     | 7      | 16    | 9       | 7       | E    | 0           | 212997.208   | -0.027                     | 110.6919  |
| 17   | 10     | 7      | 16    | 9       | 8       | A    | 0           | 213022.680   | -0.056                     | 110.6798  |
| 35   | 7      | 29     | 34    | 6       | 28      | E    | 0           | 213061.455   | -0.022                     | 200.2589  |
| 35   | 7      | 29     | 34    | 6       | 28      | A    | 0           | 213069.168   | -0.047                     | 200.2513  |
| 35   | 7      | 29     | 34    | 6       | 28      | E    | 1           | 213072.427   | 0.012                      | 328.5819  |
| 50   | 20     | 30     | 50    | 19      | 31      | E    | 0           | 213090.358   | -0.138                     | 399.9583  |
| 50   | 20     | 31     | 50    | 19      | 32      | E    | 0           | 213110.921   | -0.054                     | 399.9474  |
| 50   | 20     | 30     | 50    | 19      | 31      | A    | 0           | 213140.553   | 0.162                      | 399.9582  |
| 56   | 8      | 48     | 56    | 7       | 49      | E    | 1           | 213336.190   | 0.270                      | 531.1189  |
| 56   | 9      | 48     | 56    | 8       | 49      | E    | 1           | 213336.190   | 0.012                      | 531.1189  |
| 19   | 9      | 10     | 18    | 8       | 10      | E    | 0           | 213401.122   | -0.041                     | 114.7689  |
| 19   | 9      | 11     | 18    | 8       | 10      | A    | 0           | 213405.417   | -0.018                     | 114.7567  |
| 56   | 8      | 48     | 56    | 7       | 49      | E    | 0           | 213427.162   | 0.094                      | 402.8268  |
| 56   | 9      | 48     | 56    | 8       | 49      | E    | 0           | 213427.162   | -0.141                     | 402.8268  |
| 19   | 9      | 10     | 18    | 8       | 11      | A    | 0           | 213438.620   | 0.046                      | 114.7557  |
| 56   | 8      | 48     | 56    | 7       | 49      | A    | 0           | 213442.236   | 0.044                      | 402.8234  |
| 56   | 9      | 48     | 56    | 8       | 49      | A    | 0           | 213442.236   | -0.193                     | 402.8234  |
| 34   | 13     | 21     | 33    | 13      | 20      | E    | 0           | 213468.590   | -0.016                     | 215.5323  |
| 46   | 2      | 44     | 46    | 1       | 45      | A    | 1           | 213516.054   | -0.468                     | 392.0566  |
| 46   | 3      | 44     | 46    | 2       | 45      | A    | 1           | 213516.054   | -0.468                     | 392.0566  |
| 49   | 4      | 45     | 49    | 3       | 46      | E    | 0           | 213554.574   | 0.031                      | 303.8578  |
| 49   | 5      | 45     | 49    | 4       | 46      | E    | 0           | 213554.574   | 0.031                      | 303.8578  |
| 49   | 4      | 45     | 49    | 3       | 46      | A    | 0           | 213582.886   | 0.059                      | 303.8503  |
| 49   | 5      | 45     | 49    | 4       | 46      | A    | 0           | 213582.886   | 0.059                      | 303.8503  |
| 49   | 4      | 45     | 49    | 3       | 46      | E    | 1           | 213638.395   | -0.106                     | 432.1612  |
| 49   | 5      | 45     | 49    | 4       | 46      | E    | 1           | 213638.395   | -0.106                     | 432.1612  |
| 21   | 8      | 13     | 20    | 7       | 14      | A    | 0           | 213691.170   | -0.006                     | 120.1788  |
| 58   | 9      | 49     | 58    | 8       | 50      | E    | 1           | 213752.575   | 0.202                      | 560.7362  |
| 58   | 10     | 49     | 58    | 9       | 50      | E    | 1           | 213753.711   | 0.266                      | 560.7362  |
| 60   | 10     | 50     | 60    | 9       | 51      | E    | 1           | 213814.228   | 0.401                      | 591.3938  |
| 60   | 11     | 50     | 60    | 10      | 51      | E    | 1           | 213818.329   | 0.410                      | 591.3938  |
| 49   | 20     | 29     | 49    | 19      | 30      | E    | 0           | 213910.130   | -0.069                     | 389.4880  |
| 49   | 20     | 30     | 49    | 19      | 31      | E    | 0           | 213934.229   | -0.025                     | 389.4770  |
| 49   | 20     | 29     | 49    | 19      | 30      | A    | 0           | 213960.066   | 0.069                      | 389.4880  |
| 35   | 7      | 28     | 34    | 8       | 27      | E    | 1           | 214062.859   | -0.151                     | 332.2110  |
| 35   | 7      | 28     | 34    | 8       | 27      | A    | 0           | 214193.903   | 0.028                      | 203.8833  |
| 61   | 21     | 40     | 61    | 20      | 41      | A    | 0           | 214255.598   | -0.039                     | 536.5717  |
| 61   | 21     | 41     | 61    | 20      | 42      | E    | 0           | 214261.494   | -0.050                     | 536.5608  |
| 61   | 21     | 41     | 61    | 20      | 42      | A    | 0           | 214321.101   | -0.079                     | 536.5693  |
| 34   | 12     | 23     | 33    | 12      | 22      | A    | 0           | 214466.831   | -0.012                     | 211.0001  |
| 36   | 8      | 28     | 35    | 9       | 27      | A    | 0           | 214475.812   | -0.041                     | 214.6062  |
| 46   | 2      | 44     | 46    | 1       | 45      | E    | 0           | 214492.852   | -0.015                     | 263.4365  |
| 46   | 3      | 44     | 46    | 2       | 45      | E    | 0           | 214492.852   | -0.015                     | 263.4365  |
| 34   | 12     | 23     | 33    | 12      | 22      | E    | 0           | 214502.349   | -0.084                     | 210.9982  |
| 36   | 8      | 28     | 35    | 9       | 27      | E    | 0           | 214507.409   | 0.001                      | 214.6130  |
| 46   | 2      | 44     | 46    | 1       | 45      | A    | 0           | 214528.097   | 0.079                      | 263.4265  |
| 46   | 3      | 44     | 46    | 2       | 45      | A    | 0           | 214528.097   | 0.079                      | 263.4265  |
| 34   | 12     | 22     | 33    | 12      | 21      | E    | 0           | 214532.194   | 0.011                      | 211.0113  |
| 34   | 12     | 22     | 33    | 12      | 21      | A    | 0           | 214560.962   | -0.096                     | 211.0033  |
| 46   | 2      | 44     | 46    | 1       | 45      | E    | 1           | 214663.812   | -0.062                     | 391.7353  |
| 46   | 3      | 44     | 46    | 2       | 45      | E    | 1           | 214663.812   | -0.062                     | 391.7353  |
| 48   | 20     | 28     | 48    | 19      | 29      | E    | 0           | 214671.835   | -0.049                     | 379.2377  |
| 48   | 20     | 28     | 48    | 19      | 29      | A    | 0           | 214721.550   | 0.014                      | 379.2378  |
| 34   | 7      | 27     | 33    | 7       | 26      | E    | 0           | 214975.418   | -0.026                     | 196.5459  |
| 34   | 7      | 27     | 33    | 7       | 26      | A    | 0           | 214986.268   | -0.015                     | 196.5376  |
| 36   | 6      | 30     | 35    | 7       | 29      | A    | 1           | 217089.376   | -0.058                     | 335.9261  |
| 39   | 3      | 36     | 38    | 3       | 35      | A    | 1           | 217277.548   | 0.006                      | 343.2787  |
| 39   | 3      | 36     | 38    | 4       | 35      | A    | 1           | 217277.548   | 0.015                      | 343.2787  |
| 39   | 4      | 36     | 38    | 3       | 35      | A    | 1           | 217277.548   | 0.002                      | 343.2787  |
| 39   | 4      | 36     | 38    | 4       | 35      | A    | 1           | 217277.548   | 0.011                      | 343.2787  |
| 37   | 6      | 32     | 36    | 5       | 31      | E    | 1           | 217303.743   | -0.090                     | 338.6257  |
| 39   | 3      | 36     | 38    | 3       | 35      | E    | 1           | 217369.391   | -0.052                     | 343.0049  |
| 39   | 3      | 36     | 38    | 4       | 35      | E    | 1           | 217369.391   | -0.041                     | 343.0049  |
| 39   | 4      | 36     | 38    | 3       | 35      | E    | 1           | 217369.391   | -0.057                     | 343.0049  |
| 39   | 4      | 36     | 38    | 4       | 35      | E    | 1           | 217369.391   | -0.046                     | 343.0049  |
| 39   | 3      | 36     | 38    | 3       | 35      | E    | 0           | 217407.216   | -0.080                     | 214.6846  |
| 39   | 4      | 36     | 38    | 4       | 35      | E    | 0           | 217407.216   | -0.075                     | 214.6846  |
| 39   | 4      | 36     | 38    | 3       | 35      | A    | 0           | 217410.102   | -0.023                     | 214.6761  |
| 40   | 2      | 38     | 39    | 2       | 37      | A    | 1           | 217453.444   | -0.002                     | 344.8139  |
| 40   | 2      | 38     | 39    | 3       | 37      | A    | 1           | 217453.444   | -0.002                     | 344.8139  |
| 40   | 3      | 38     | 39    | 2       | 37      | A    | 1           | 217453.444   | -0.002                     | 344.8139  |
| 40   | 3      | 38     | 39    | 3       | 37      | A    | 1           | 217453.444   | -0.002                     | 344.8139  |
| 40   | 2      | 38     | 39    | 2       | 37      | E    | 1           | 217520.342   | -0.042                     | 344.5154  |
| 40   | 2      | 38     | 39    | 3       | 37      | E    | 1           | 217520.342   | -0.041                     | 344.5154  |
| 40   | 3      | 38     | 39    | 2       | 37      | E    | 1           | 217520.342   | -0.042                     | 344.5154  |
| 40   | 3      | 38     | 39    | 3       | 37      | E    | 1           | 217520.342   | -0.041                     | 344.5154  |
| 40   | 2      | 38     | 39    | 2       | 37      | E    | 0           | 217563.144   | -0.023                     | 216.1999  |
| 40   | 3      | 38     | 39    | 3       | 37      | E    | 0           | 217563.144   | -0.023                     | 216.1999  |
| 40   | 2      | 38     | 39    | 2       | 37      | A    | 0           | 217565.220   | -0.002                     | 216.1906  |



| $J'$ | $K'_a$ | $K'_c$ | $J''$ | $K''_a$ | $K''_c$ | Sym. | $v_{tCH_3}$ | $\nu_{Obs.}$ | $\nu_{Obs.} - \nu_{Calc.}$ | $E_{low}$ |
|------|--------|--------|-------|---------|---------|------|-------------|--------------|----------------------------|-----------|
| 40   | 2      | 38     | 39    | 3       | 37      | A    | 0           | 217565.220   | -0.002                     | 216.1906  |
| 40   | 3      | 38     | 39    | 2       | 37      | A    | 0           | 217565.220   | -0.002                     | 216.1906  |
| 40   | 3      | 38     | 39    | 3       | 37      | A    | 0           | 217565.220   | -0.002                     | 216.1906  |
| 41   | 1      | 40     | 40    | 1       | 39      | A    | 1           | 217657.588   | 0.018                      | 345.9298  |
| 41   | 1      | 40     | 40    | 2       | 39      | A    | 1           | 217657.588   | 0.018                      | 345.9298  |
| 41   | 2      | 40     | 40    | 1       | 39      | A    | 1           | 217657.588   | 0.018                      | 345.9298  |
| 41   | 2      | 40     | 40    | 2       | 39      | A    | 1           | 217657.588   | 0.018                      | 345.9298  |
| 41   | 1      | 40     | 40    | 1       | 39      | E    | 1           | 217698.075   | 0.123                      | 345.6005  |
| 41   | 1      | 40     | 40    | 2       | 39      | E    | 1           | 217698.075   | 0.123                      | 345.6005  |
| 41   | 2      | 40     | 40    | 1       | 39      | E    | 1           | 217698.075   | 0.123                      | 345.6005  |
| 41   | 2      | 40     | 40    | 2       | 39      | E    | 1           | 217698.075   | 0.123                      | 345.6005  |
| 41   | 1      | 40     | 40    | 1       | 39      | E    | 0           | 217745.944   | -0.034                     | 217.2914  |
| 41   | 2      | 40     | 40    | 2       | 39      | E    | 0           | 217745.944   | -0.034                     | 217.2914  |
| 41   | 1      | 40     | 40    | 1       | 39      | A    | 0           | 217747.231   | 0.012                      | 217.2811  |
| 41   | 1      | 40     | 40    | 2       | 39      | A    | 0           | 217747.231   | 0.012                      | 217.2811  |
| 41   | 2      | 40     | 40    | 1       | 39      | A    | 0           | 217747.231   | 0.012                      | 217.2811  |
| 41   | 2      | 40     | 40    | 2       | 39      | A    | 0           | 217747.231   | 0.012                      | 217.2811  |
| 42   | 0      | 42     | 41    | 0       | 41      | A    | 1           | 217875.568   | -0.010                     | 346.6392  |
| 42   | 0      | 42     | 41    | 1       | 41      | A    | 1           | 217875.568   | -0.010                     | 346.6392  |
| 42   | 1      | 42     | 41    | 0       | 41      | A    | 1           | 217875.568   | -0.010                     | 346.6392  |
| 42   | 1      | 42     | 41    | 1       | 41      | A    | 1           | 217875.568   | -0.010                     | 346.6392  |
| 42   | 0      | 42     | 41    | 0       | 41      | E    | 1           | 217886.701   | -0.015                     | 346.2725  |
| 42   | 1      | 42     | 41    | 1       | 41      | E    | 1           | 217886.701   | -0.015                     | 346.2725  |
| 42   | 0      | 42     | 41    | 0       | 41      | A    | 0           | 217940.847   | -0.192                     | 217.9602  |
| 42   | 0      | 42     | 41    | 1       | 41      | A    | 0           | 217940.847   | -0.192                     | 217.9602  |
| 42   | 1      | 42     | 41    | 0       | 41      | A    | 0           | 217940.847   | -0.192                     | 217.9602  |
| 42   | 1      | 42     | 41    | 1       | 41      | A    | 0           | 217940.847   | -0.192                     | 217.9602  |
| 42   | 0      | 42     | 41    | 0       | 41      | E    | 0           | 217940.847   | 0.157                      | 217.9716  |
| 42   | 1      | 42     | 41    | 1       | 41      | E    | 0           | 217940.847   | 0.157                      | 217.9716  |
| 42   | 20     | 23     | 42    | 19      | 24      | E    | 0           | 218252.016   | -0.007                     | 322.3059  |
| 42   | 20     | 22     | 42    | 19      | 23      | A    | 0           | 218273.711   | -0.037                     | 322.3176  |
| 42   | 20     | 23     | 42    | 19      | 24      | A    | 0           | 218273.711   | -0.038                     | 322.3176  |
| 16   | 11     | 6      | 15    | 10      | 6       | E    | 0           | 218363.950   | 0.015                      | 110.9737  |
| 16   | 11     | 5      | 15    | 10      | 5       | E    | 0           | 218380.910   | -0.039                     | 110.9863  |
| 16   | 11     | 6      | 15    | 10      | 5       | A    | 0           | 218410.974   | 0.028                      | 110.9751  |
| 16   | 11     | 5      | 15    | 10      | 6       | A    | 0           | 218410.974   | 0.027                      | 110.9751  |
| 58   | 21     | 37     | 58    | 20      | 38      | E    | 0           | 218416.204   | -0.029                     | 498.5573  |
| 58   | 21     | 37     | 58    | 20      | 38      | A    | 0           | 218462.548   | 0.045                      | 498.5579  |
| 31   | 8      | 24     | 30    | 7       | 23      | E    | 0           | 218494.480   | -0.098                     | 175.9123  |
| 31   | 8      | 24     | 30    | 7       | 23      | A    | 0           | 218542.172   | -0.016                     | 175.9030  |
| 50   | 4      | 46     | 50    | 3       | 47      | A    | 0           | 218554.788   | 0.153                      | 312.9828  |
| 50   | 5      | 46     | 50    | 4       | 47      | A    | 0           | 218554.788   | 0.153                      | 312.9828  |
| 57   | 8      | 49     | 57    | 7       | 50      | E    | 0           | 218562.809   | 0.037                      | 413.8234  |
| 57   | 9      | 49     | 57    | 8       | 50      | E    | 0           | 218562.809   | -0.089                     | 413.8234  |
| 35   | 15     | 21     | 34    | 15      | 20      | A    | 0           | 218570.821   | 0.005                      | 232.9421  |
| 57   | 8      | 49     | 57    | 7       | 50      | A    | 0           | 218578.322   | -0.016                     | 413.8201  |
| 57   | 9      | 49     | 57    | 8       | 50      | A    | 0           | 218578.322   | -0.142                     | 413.8201  |
| 33   | 8      | 26     | 32    | 7       | 25      | E    | 0           | 218603.764   | -0.021                     | 189.5115  |
| 33   | 8      | 26     | 32    | 7       | 25      | A    | 0           | 218637.856   | 0.004                      | 189.5115  |
| 41   | 20     | 21     | 41    | 19      | 22      | E    | 0           | 218675.397   | -0.019                     | 313.5874  |
| 41   | 20     | 22     | 41    | 19      | 23      | E    | 0           | 218703.034   | 0.321                      | 313.5763  |
| 41   | 20     | 21     | 41    | 19      | 22      | A    | 0           | 218723.980   | -0.030                     | 313.5881  |
| 41   | 20     | 22     | 41    | 19      | 23      | A    | 0           | 218723.980   | -0.030                     | 313.5881  |
| 18   | 10     | 9      | 17    | 9       | 9       | E    | 0           | 219046.684   | 0.006                      | 114.1989  |
| 18   | 10     | 8      | 17    | 9       | 8       | E    | 0           | 219069.204   | -0.038                     | 114.2106  |
| 18   | 10     | 9      | 17    | 9       | 8       | A    | 0           | 219094.548   | 0.225                      | 114.1986  |
| 40   | 20     | 20     | 40    | 19      | 21      | A    | 0           | 219140.349   | -0.036                     | 305.0733  |
| 40   | 20     | 21     | 40    | 19      | 22      | A    | 0           | 219140.349   | -0.036                     | 305.0733  |
| 20   | 9      | 12     | 19    | 8       | 12      | E    | 0           | 219291.649   | -0.040                     | 118.7209  |
| 20   | 9      | 11     | 19    | 8       | 11      | E    | 0           | 219313.146   | -0.060                     | 118.7318  |
| 67   | 22     | 45     | 67    | 21      | 46      | A    | 0           | 219383.153   | -0.014                     | 625.6123  |
| 67   | 22     | 45     | 67    | 21      | 46      | E    | 0           | 219392.954   | -0.116                     | 625.6093  |
| 35   | 7      | 28     | 34    | 7       | 27      | E    | 0           | 219415.446   | -0.068                     | 203.7167  |
| 38   | 20     | 18     | 38    | 19      | 19      | E    | 0           | 219831.483   | -0.009                     | 288.6849  |
| 38   | 20     | 19     | 38    | 19      | 20      | E    | 0           | 219859.609   | 0.067                      | 288.6738  |
| 23   | 8      | 16     | 22    | 7       | 15      | E    | 0           | 219861.704   | -0.053                     | 129.4252  |
| 38   | 20     | 18     | 38    | 19      | 19      | A    | 0           | 219879.731   | -0.011                     | 288.6858  |
| 38   | 20     | 19     | 38    | 19      | 20      | A    | 0           | 219879.731   | -0.011                     | 288.6858  |
| 23   | 8      | 16     | 22    | 7       | 15      | A    | 0           | 219921.681   | 0.009                      | 129.4161  |
| 22   | 8      | 14     | 21    | 7       | 15      | A    | 0           | 219982.534   | -0.041                     | 124.5982  |
| 22   | 8      | 14     | 21    | 7       | 15      | E    | 0           | 219992.362   | -0.003                     | 124.6066  |
| 35   | 13     | 23     | 34    | 13      | 22      | A    | 0           | 220089.825   | 0.008                      | 222.6444  |
| 35   | 13     | 22     | 34    | 13      | 21      | E    | 0           | 220100.716   | -0.041                     | 222.6529  |
| 35   | 13     | 23     | 34    | 13      | 22      | E    | 0           | 220102.669   | -0.016                     | 222.6398  |
| 35   | 13     | 22     | 34    | 13      | 21      | A    | 0           | 220107.478   | -0.107                     | 222.6450  |
| 37   | 20     | 17     | 37    | 19      | 18      | E    | 0           | 220158.415   | 0.026                      | 280.8111  |
| 37   | 20     | 18     | 37    | 19      | 19      | E    | 0           | 220186.695   | 0.047                      | 280.7999  |
| 34   | 8      | 27     | 33    | 7       | 26      | E    | 0           | 220190.716   | -0.042                     | 196.5459  |
| 37   | 20     | 17     | 37    | 19      | 18      | A    | 0           | 220206.693   | 0.157                      | 280.8120  |
| 37   | 20     | 18     | 37    | 19      | 19      | A    | 0           | 220206.693   | 0.157                      | 280.8120  |
| 34   | 8      | 27     | 33    | 7       | 26      | A    | 0           | 220217.905   | -0.001                     | 196.5376  |
| 52   | 5      | 47     | 52    | 4       | 48      | A    | 0           | 220224.189   | 0.029                      | 339.3822  |
| 52   | 6      | 47     | 52    | 5       | 48      | A    | 0           | 220224.189   | 0.029                      | 339.3822  |
| 34   | 10     | 24     | 33    | 10      | 23      | A    | 0           | 220404.965   | -0.082                     | 203.5374  |
| 34   | 10     | 24     | 33    | 10      | 23      | E    | 0           | 220413.178   | 0.004                      | 203.5440  |
| 36   | 20     | 16     | 36    | 19      | 17      | E    | 0           | 220458.976   | -0.067                     | 273.1500  |
| 36   | 20     | 17     | 36    | 19      | 18      | E    | 0           | 220487.538   | 0.044                      | 273.1388  |
| 36   | 20     | 16     | 36    | 19      | 17      | A    | 0           | 220507.080   | -0.015                     | 273.1509  |
| 36   | 20     | 17     | 36    | 19      | 18      | A    | 0           | 220507.080   | -0.015                     | 273.1509  |
| 36   | 7      | 29     | 35    | 8       | 28      | A    | 0           | 220672.096   | -0.105                     | 211.1390  |
| 36   | 7      | 29     | 35    | 8       | 28      | E    | 0           | 220674.436   | 0.080                      | 211.1462  |
| 35   | 20     | 15     | 35    | 19      | 16      | E    | 0           | 220734.930   | -0.161                     | 265.7011  |
| 56   | 21     | 35     | 56    | 20      | 36      | E    | 0           | 220736.082   | 0.142                      | 474.3480  |
| 56   | 21     | 36     | 56    | 20      | 37      | E    | 0           | 220761.495   | -0.039                     | 474.3381  |
| 35   | 20     | 16     | 35    | 19      | 17      | E    | 0           | 220763.781   | 0.065                      | 265.6899  |
| 35   | 20     | 15     | 35    | 19      | 16      | A    | 0           | 220783.018   | -0.036                     | 265.7021  |
| 35   | 20     | 16     | 35    | 19      | 17      | A    | 0           | 220783.018   | -0.036                     | 265.7021  |
| 56   | 21     | 35     | 56    | 20      | 36      | A    | 0           | 220785.107   | -0.041                     | 474.3488  |
| 56   | 21     | 36     | 56    | 20      | 37      | A    | 0           | 220787.725   | -0.090                     | 474.3487  |
| 34   | 20     | 14     | 34    | 19      | 15      | E    | 0           | 220988.036   | -0.046                     | 258.4640  |
| 34   | 20     | 15     | 34    | 19      | 16      | E    | 0           | 221016.914   | 0.049                      | 258.4528  |
| 34   | 20     | 14     | 34    | 19      | 15      | A    | 0           | 221035.932   | -0.029                     | 258.4650  |
| 34   | 20     | 15     | 34    | 19      | 16      | A    | 0           | 221035.932   | -0.029                     | 258.4650  |
| 35   | 12     | 24     | 34    | 12      | 23      | A    | 0           | 221191.990   | -0.027                     | 218.1539  |
| 33   | 20     | 13     | 33    | 19      | 14      | E    | 0           | 221219.402   | -0.076                     | 251.4382  |
| 35   | 12     | 24     | 34    | 12      | 23      | E    | 0           | 221233.131   | 0.010                      | 218.1533  |
| 33   | 20     | 14     | 33    | 19      | 15      | E    | 0           | 221248.424   | 0.020                      | 251.4270  |
| 33   | 20     | 13     | 33    | 19      | 14      | A    | 0           | 221267.250   | -0.028                     | 251.4392  |
| 33   | 20     | 14     | 33    | 19      | 15      | A    | 0           | 221267.250   | -0.028                     | 251.4392  |
| 29   | 8      | 22     | 28    | 7       | 21      | E    | 0           | 221301.808   | -0.078                     | 162.9673  |
| 35   | 12     | 23     | 34    | 12      | 22      | E    | 0           | 221333.499   | 0.008                      | 218.1673  |
| 29   | 8      | 22     | 28    | 7       | 21      | A    | 0           | 221357.442   | -0.010                     | 162.9577  |
| 35   | 12     | 23     | 34    | 12      | 22      | A    | 0           | 221367.050   | -0.026                     | 218.1603  |
| 35   | 9      | 27     | 34    | 9       | 26      | E    | 0           | 221418.686   | -0.028                     | 207.2272  |
| 35   | 9      | 27     | 34    | 9       | 26      | A    | 0           | 221420.838   | -0.023                     | 207.2204  |
| 32   | 20     | 12     | 32    | 19      | 13      | E    | 0           | 221430.594   | -0.072                     | 244.6233  |



| $J'$ | $K'_a$ | $K'_c$ | $J''$ | $K''_a$ | $K''_c$ | Sym. | $v_{tCH_3}$ | $\nu_{Obs.}$ | $\nu_{Obs.} - \nu_{Calc.}$ | $E_{low}$ |
|------|--------|--------|-------|---------|---------|------|-------------|--------------|----------------------------|-----------|
| 32   | 20     | 12     | 32    | 19      | 13      | A    | 0           | 221478.378   | -0.013                     | 244.6244  |
| 32   | 20     | 13     | 32    | 19      | 14      | A    | 0           | 221478.378   | -0.013                     | 244.6244  |
| 49   | 3      | 46     | 49    | 2       | 47      | A    | 0           | 221604.203   | 0.074                      | 296.4584  |
| 49   | 4      | 46     | 49    | 3       | 47      | A    | 0           | 221604.203   | 0.074                      | 296.4584  |
| 54   | 6      | 48     | 54    | 5       | 49      | E    | 1           | 221623.994   | 0.089                      | 495.1570  |
| 54   | 7      | 48     | 54    | 6       | 49      | E    | 1           | 221623.994   | 0.086                      | 495.1570  |
| 54   | 6      | 48     | 54    | 5       | 49      | E    | 0           | 221626.280   | 0.010                      | 366.8590  |
| 54   | 7      | 48     | 54    | 6       | 49      | E    | 0           | 221626.280   | 0.008                      | 366.8590  |
| 54   | 6      | 48     | 54    | 5       | 49      | A    | 0           | 221648.746   | 0.012                      | 366.8538  |
| 54   | 7      | 48     | 54    | 6       | 49      | A    | 0           | 221648.746   | 0.009                      | 366.8538  |
| 31   | 20     | 12     | 31    | 19      | 13      | E    | 0           | 221652.210   | 0.079                      | 238.0078  |
| 31   | 20     | 11     | 31    | 19      | 12      | A    | 0           | 221670.578   | -0.039                     | 238.0201  |
| 31   | 20     | 12     | 31    | 19      | 13      | A    | 0           | 221670.578   | -0.039                     | 238.0201  |
| 49   | 3      | 46     | 49    | 2       | 47      | E    | 1           | 221702.019   | -0.137                     | 424.7660  |
| 49   | 4      | 46     | 49    | 3       | 47      | E    | 1           | 221702.019   | -0.137                     | 424.7660  |
| 55   | 21     | 34     | 55    | 20      | 35      | E    | 0           | 221777.774   | -0.054                     | 462.5798  |
| 30   | 20     | 10     | 30    | 19      | 11      | E    | 0           | 221797.571   | -0.042                     | 231.6249  |
| 55   | 21     | 35     | 55    | 20      | 36      | E    | 0           | 221804.064   | -0.047                     | 462.5699  |
| 30   | 20     | 10     | 30    | 19      | 11      | A    | 0           | 221845.098   | -0.106                     | 231.6260  |
| 30   | 20     | 11     | 30    | 19      | 12      | A    | 0           | 221845.098   | -0.106                     | 231.6260  |
| 29   | 20     | 9      | 29    | 19      | 10      | E    | 0           | 221955.777   | -0.034                     | 225.4405  |
| 29   | 20     | 10     | 29    | 19      | 11      | E    | 0           | 221985.247   | 0.070                      | 225.4293  |
| 29   | 20     | 9      | 29    | 19      | 10      | A    | 0           | 222003.310   | -0.032                     | 225.4416  |
| 29   | 20     | 10     | 29    | 19      | 11      | A    | 0           | 222003.310   | -0.032                     | 225.4416  |
| 28   | 20     | 8      | 28    | 19      | 9       | E    | 0           | 222098.629   | -0.055                     | 219.4656  |
| 28   | 20     | 9      | 28    | 19      | 10      | E    | 0           | 222128.116   | -0.017                     | 219.4543  |
| 28   | 20     | 8      | 28    | 19      | 9       | A    | 0           | 222146.128   | -0.032                     | 219.4667  |
| 28   | 20     | 9      | 28    | 19      | 10      | A    | 0           | 222146.128   | -0.032                     | 219.4667  |
| 38   | 5      | 33     | 37    | 6       | 32      | A    | 1           | 222237.952   | 0.003                      | 346.1121  |
| 38   | 6      | 33     | 37    | 6       | 32      | A    | 1           | 222242.611   | 0.030                      | 346.1121  |
| 38   | 5      | 33     | 37    | 5       | 32      | A    | 1           | 222246.619   | -0.005                     | 346.1118  |
| 38   | 6      | 33     | 37    | 5       | 32      | A    | 1           | 222251.274   | 0.017                      | 346.1118  |
| 37   | 6      | 31     | 36    | 7       | 30      | A    | 1           | 222261.758   | 0.037                      | 343.1743  |
| 39   | 4      | 35     | 38    | 4       | 34      | A    | 1           | 222273.130   | -0.075                     | 348.5497  |
| 39   | 4      | 35     | 38    | 5       | 34      | A    | 1           | 222273.130   | 0.166                      | 348.5497  |
| 39   | 5      | 35     | 38    | 4       | 34      | A    | 1           | 222273.130   | -0.198                     | 348.5497  |
| 39   | 5      | 35     | 38    | 5       | 34      | A    | 1           | 222273.130   | 0.044                      | 348.5497  |
| 27   | 20     | 7      | 27    | 19      | 8       | A    | 0           | 222274.665   | -0.069                     | 213.7009  |
| 27   | 20     | 8      | 27    | 19      | 9       | A    | 0           | 222274.665   | -0.069                     | 213.7009  |
| 38   | 5      | 33     | 37    | 6       | 32      | E    | 1           | 222378.716   | -0.088                     | 345.8742  |
| 38   | 6      | 33     | 37    | 6       | 32      | E    | 1           | 222384.226   | 0.047                      | 345.8742  |
| 39   | 4      | 35     | 38    | 4       | 34      | E    | 1           | 222388.780   | -0.147                     | 348.2985  |
| 39   | 4      | 35     | 38    | 5       | 34      | E    | 1           | 222388.780   | 0.138                      | 348.2985  |
| 39   | 5      | 35     | 38    | 4       | 34      | E    | 1           | 222388.780   | -0.293                     | 348.2985  |
| 39   | 5      | 35     | 38    | 5       | 34      | E    | 1           | 222388.780   | -0.008                     | 348.2985  |
| 26   | 20     | 6      | 26    | 19      | 7       | A    | 0           | 222390.137   | 0.045                      | 208.1439  |
| 26   | 20     | 7      | 26    | 19      | 8       | A    | 0           | 222390.137   | 0.045                      | 208.1439  |
| 38   | 6      | 33     | 37    | 5       | 32      | E    | 1           | 222394.146   | -0.037                     | 345.8739  |
| 40   | 3      | 37     | 39    | 3       | 36      | A    | 1           | 222400.818   | -0.011                     | 350.5263  |
| 40   | 3      | 37     | 39    | 4       | 36      | A    | 1           | 222400.818   | -0.006                     | 350.5263  |
| 40   | 4      | 37     | 39    | 3       | 36      | A    | 1           | 222400.818   | -0.013                     | 350.5263  |
| 40   | 4      | 37     | 39    | 4       | 36      | A    | 1           | 222400.818   | -0.009                     | 350.5263  |
| 38   | 5      | 33     | 37    | 6       | 32      | E    | 0           | 222407.738   | -0.006                     | 217.5507  |
| 37   | 6      | 31     | 36    | 7       | 30      | E    | 1           | 222415.748   | 0.095                      | 342.9432  |
| 38   | 6      | 33     | 37    | 6       | 32      | A    | 0           | 222417.216   | 0.049                      | 217.5433  |
| 38   | 5      | 33     | 37    | 5       | 32      | E    | 0           | 222417.216   | 0.022                      | 217.5504  |
| 38   | 6      | 33     | 37    | 5       | 32      | E    | 0           | 222422.162   | -0.097                     | 217.5504  |
| 39   | 4      | 35     | 38    | 4       | 34      | E    | 0           | 222423.424   | -0.026                     | 219.9763  |
| 39   | 5      | 35     | 38    | 5       | 34      | E    | 0           | 222423.424   | 0.104                      | 219.9763  |
| 39   | 4      | 35     | 38    | 4       | 34      | A    | 0           | 222426.863   | -0.147                     | 219.9685  |
| 39   | 4      | 35     | 38    | 5       | 34      | A    | 0           | 222426.863   | 0.121                      | 219.9685  |
| 39   | 5      | 35     | 38    | 4       | 34      | A    | 0           | 222426.863   | -0.284                     | 219.9685  |
| 39   | 5      | 35     | 38    | 5       | 34      | A    | 0           | 222426.863   | -0.016                     | 219.9685  |
| 37   | 6      | 31     | 36    | 7       | 30      | E    | 0           | 222443.512   | -0.049                     | 214.6205  |
| 37   | 6      | 31     | 36    | 7       | 30      | A    | 0           | 222448.197   | -0.009                     | 214.6133  |
| 37   | 6      | 31     | 36    | 6       | 30      | A    | 1           | 222469.646   | 0.125                      | 343.1674  |
| 40   | 3      | 37     | 39    | 3       | 36      | E    | 1           | 222492.143   | -0.063                     | 350.2556  |
| 40   | 3      | 37     | 39    | 4       | 36      | E    | 1           | 222492.143   | -0.057                     | 350.2556  |
| 40   | 4      | 37     | 39    | 3       | 36      | E    | 1           | 222492.143   | -0.065                     | 350.2556  |
| 40   | 4      | 37     | 39    | 4       | 36      | E    | 1           | 222492.143   | -0.060                     | 350.2556  |
| 40   | 3      | 37     | 39    | 3       | 36      | E    | 0           | 222531.678   | -0.013                     | 221.9366  |
| 40   | 4      | 37     | 39    | 4       | 36      | E    | 0           | 222531.678   | -0.010                     | 221.9366  |
| 40   | 3      | 37     | 39    | 3       | 36      | A    | 0           | 222534.483   | -0.015                     | 221.9281  |
| 40   | 3      | 37     | 39    | 4       | 36      | A    | 0           | 222534.483   | -0.010                     | 221.9281  |
| 40   | 4      | 37     | 39    | 3       | 36      | A    | 0           | 222534.483   | -0.018                     | 221.9281  |
| 40   | 4      | 37     | 39    | 4       | 36      | A    | 0           | 222534.483   | -0.013                     | 221.9281  |
| 37   | 7      | 31     | 36    | 7       | 30      | E    | 1           | 222549.290   | -0.055                     | 342.9432  |
| 41   | 2      | 39     | 40    | 2       | 38      | A    | 1           | 222579.392   | -0.014                     | 352.0673  |
| 41   | 2      | 39     | 40    | 3       | 38      | A    | 1           | 222579.392   | -0.014                     | 352.0673  |
| 41   | 3      | 39     | 40    | 2       | 38      | A    | 1           | 222579.392   | -0.014                     | 352.0673  |
| 41   | 3      | 39     | 40    | 3       | 38      | A    | 1           | 222579.392   | -0.014                     | 352.0673  |
| 37   | 7      | 31     | 36    | 6       | 30      | A    | 1           | 222587.412   | 0.040                      | 343.1674  |
| 24   | 8      | 17     | 23    | 7       | 16      | E    | 0           | 222636.032   | -0.061                     | 134.3914  |
| 41   | 2      | 39     | 40    | 2       | 38      | E    | 1           | 222646.064   | -0.019                     | 351.7711  |
| 41   | 2      | 39     | 40    | 3       | 38      | E    | 1           | 222646.064   | -0.019                     | 351.7711  |
| 41   | 3      | 39     | 40    | 2       | 38      | E    | 1           | 222646.064   | -0.019                     | 351.7711  |
| 41   | 3      | 39     | 40    | 3       | 38      | E    | 1           | 222646.064   | -0.019                     | 351.7711  |
| 41   | 2      | 39     | 40    | 2       | 38      | E    | 0           | 222690.352   | -0.016                     | 223.4570  |
| 41   | 3      | 39     | 40    | 3       | 38      | E    | 0           | 222690.352   | -0.016                     | 223.4570  |
| 41   | 2      | 39     | 40    | 2       | 38      | A    | 0           | 222692.402   | -0.013                     | 223.4477  |
| 41   | 2      | 39     | 40    | 3       | 38      | A    | 0           | 222692.402   | -0.013                     | 223.4477  |
| 41   | 3      | 39     | 40    | 2       | 38      | A    | 0           | 222692.402   | -0.013                     | 223.4477  |
| 41   | 3      | 39     | 40    | 3       | 38      | A    | 0           | 222692.402   | -0.013                     | 223.4477  |
| 42   | 1      | 41     | 41    | 1       | 40      | A    | 1           | 222784.509   | 0.037                      | 353.1900  |
| 42   | 1      | 41     | 41    | 2       | 40      | A    | 1           | 222784.509   | 0.037                      | 353.1900  |
| 42   | 2      | 41     | 41    | 1       | 40      | A    | 1           | 222784.509   | 0.037                      | 353.1900  |
| 42   | 2      | 41     | 41    | 2       | 40      | A    | 1           | 222784.509   | 0.037                      | 353.1900  |
| 56   | 7      | 49     | 56    | 6       | 50      | A    | 0           | 222813.849   | 0.013                      | 395.3911  |
| 56   | 8      | 49     | 56    | 7       | 50      | A    | 0           | 222813.849   | -0.001                     | 395.3911  |
| 42   | 1      | 41     | 41    | 1       | 40      | E    | 1           | 222824.728   | -0.003                     | 352.8621  |
| 42   | 1      | 41     | 41    | 2       | 40      | E    | 1           | 222824.728   | -0.003                     | 352.8621  |
| 42   | 2      | 41     | 41    | 1       | 40      | E    | 1           | 222824.728   | -0.003                     | 352.8621  |
| 42   | 2      | 41     | 41    | 2       | 40      | E    | 1           | 222824.728   | -0.003                     | 352.8621  |
| 13   | 13     | 0      | 12    | 12      | 0       | E    | 0           | 222831.380   | -0.069                     | 110.7238  |
| 13   | 13     | 1      | 12    | 12      | 0       | A    | 0           | 222869.202   | 0.010                      | 110.7148  |
| 13   | 13     | 0      | 12    | 12      | 1       | A    | 0           | 222869.202   | 0.010                      | 110.7148  |
| 42   | 1      | 41     | 41    | 1       | 40      | E    | 0           | 222874.131   | -0.039                     | 224.5546  |
| 42   | 2      | 41     | 41    | 2       | 40      | E    | 0           | 222874.131   | -0.039                     | 224.5546  |
| 42   | 1      | 41     | 41    | 1       | 40      | A    | 0           | 222875.412   | 0.005                      | 224.5444  |
| 42   | 1      | 41     | 41    | 2       | 40      | A    | 0           | 222875.412   | 0.005                      | 224.5444  |
| 42   | 2      | 41     | 41    | 1       | 40      | A    | 0           | 222875.412   | 0.005                      | 224.5444  |
| 42   | 2      | 41     | 41    | 2       | 40      | A    | 0           | 222875.412   | 0.005                      | 224.5444  |
| 28   | 8      | 21     | 27    | 7       | 20      | A    | 0           | 222993.559   | -0.035                     | 156.7761  |
| 43   | 0      | 43     | 42    | 0       | 42      | A    | 1           | 223002.876   | 0.073                      | 353.9067  |
| 43   | 0      | 43     | 42    | 1       | 42      | A    | 1           | 223002.876   | 0.073                      | 353.9067  |
| 43   | 1      | 43     | 42    | 0       | 42      | A    | 1           | 223002.876   | 0.073                      | 353.9067  |



| $J'$ | $K'_a$ | $K'_c$ | $J''$ | $K''_a$ | $K''_c$ | Sym. | $v_{tCH_3}$ | $\nu_{Obs.}$ | $\nu_{Obs.} - \nu_{Calc.}$ | $E_{low}$ |
|------|--------|--------|-------|---------|---------|------|-------------|--------------|----------------------------|-----------|
| 43   | 1      | 43     | 42    | 1       | 42      | A    | 1           | 223002.876   | 0.073                      | 353.9067  |
| 43   | 0      | 43     | 42    | 0       | 42      | E    | 1           | 223013.827   | -0.021                     | 353.5404  |
| 43   | 1      | 43     | 42    | 1       | 42      | E    | 1           | 223013.827   | -0.021                     | 353.5404  |
| 36   | 20     | 16     | 35    | 20      | 15      | E    | 0           | 223036.532   | -0.045                     | 273.0640  |
| 43   | 0      | 43     | 42    | 0       | 42      | A    | 0           | 223069.340   | -0.186                     | 225.2299  |
| 43   | 0      | 43     | 42    | 1       | 42      | A    | 0           | 223069.340   | -0.186                     | 225.2299  |
| 43   | 1      | 43     | 42    | 0       | 42      | A    | 0           | 223069.340   | -0.186                     | 225.2299  |
| 43   | 1      | 43     | 42    | 1       | 42      | A    | 0           | 223069.340   | -0.186                     | 225.2299  |
| 43   | 0      | 43     | 42    | 0       | 42      | E    | 0           | 223069.340   | 0.161                      | 225.2413  |
| 43   | 1      | 43     | 42    | 1       | 42      | E    | 0           | 223069.340   | 0.161                      | 225.2413  |
| 51   | 4      | 47     | 51    | 3       | 48      | A    | 0           | 223524.069   | 0.094                      | 322.2862  |
| 51   | 4      | 47     | 51    | 4       | 48      | A    | 0           | 223524.069   | 0.094                      | 322.2862  |
| 51   | 5      | 47     | 51    | 3       | 48      | A    | 0           | 223524.069   | 0.094                      | 322.2862  |
| 51   | 5      | 47     | 51    | 4       | 48      | A    | 0           | 223524.069   | 0.094                      | 322.2862  |
| 36   | 18     | 18     | 35    | 18      | 17      | A    | 0           | 223636.560   | -0.009                     | 258.7323  |
| 36   | 18     | 19     | 35    | 18      | 18      | A    | 0           | 223636.560   | -0.009                     | 258.7323  |
| 53   | 21     | 32     | 53    | 20      | 33      | E    | 0           | 223654.568   | 0.037                      | 439.7116  |
| 58   | 8      | 50     | 58    | 7       | 51      | E    | 0           | 223686.146   | -0.031                     | 424.9904  |
| 58   | 9      | 50     | 58    | 8       | 51      | E    | 0           | 223686.146   | -0.098                     | 424.9904  |
| 53   | 21     | 32     | 53    | 20      | 33      | A    | 0           | 223704.175   | 0.133                      | 439.7128  |
| 15   | 12     | 3      | 14    | 11      | 4       | A    | 0           | 223727.600   | -0.006                     | 111.8793  |
| 15   | 12     | 4      | 14    | 11      | 3       | A    | 0           | 223727.600   | -0.006                     | 111.8793  |
| 36   | 17     | 20     | 35    | 17      | 19      | A    | 0           | 224024.415   | -0.175                     | 252.1607  |
| 36   | 17     | 19     | 35    | 17      | 18      | A    | 0           | 224024.415   | -0.175                     | 252.1607  |
| 36   | 17     | 20     | 35    | 17      | 19      | E    | 0           | 224026.887   | 0.152                      | 252.1503  |
| 17   | 11     | 7      | 16    | 10      | 7       | E    | 0           | 224481.686   | -0.066                     | 114.2738  |
| 36   | 16     | 21     | 35    | 16      | 20      | A    | 0           | 224494.530   | -0.091                     | 245.9920  |
| 17   | 11     | 6      | 16    | 10      | 7       | A    | 0           | 224528.845   | 0.023                      | 114.2752  |
| 52   | 21     | 32     | 52    | 20      | 33      | A    | 0           | 224548.526   | -0.030                     | 428.6110  |
| 36   | 15     | 21     | 35    | 15      | 20      | A    | 0           | 225074.876   | -0.059                     | 240.2328  |
| 36   | 15     | 21     | 35    | 15      | 20      | E    | 0           | 225076.364   | -0.010                     | 240.2382  |
| 36   | 15     | 22     | 35    | 15      | 21      | E    | 0           | 225077.977   | -0.044                     | 240.2249  |
| 19   | 10     | 10     | 18    | 9       | 10      | E    | 0           | 225092.720   | 0.025                      | 117.9304  |
| 21   | 9      | 13     | 20    | 8       | 12      | A    | 0           | 225097.020   | 0.144                      | 122.9026  |
| 19   | 10     | 9      | 18    | 9       | 9       | E    | 0           | 225115.505   | -0.014                     | 117.9421  |
| 19   | 10     | 10     | 18    | 9       | 9       | A    | 0           | 225140.016   | 0.017                      | 117.9301  |
| 19   | 10     | 9      | 18    | 9       | 10      | A    | 0           | 225141.493   | -0.037                     | 117.9300  |
| 21   | 9      | 12     | 20    | 8       | 12      | E    | 0           | 225148.773   | -0.195                     | 122.9133  |
| 34   | 9      | 25     | 33    | 9       | 24      | A    | 0           | 225185.860   | -0.007                     | 200.9683  |
| 53   | 5      | 48     | 53    | 4       | 49      | A    | 0           | 225217.567   | 0.044                      | 349.1931  |
| 53   | 6      | 48     | 53    | 5       | 49      | A    | 0           | 225217.567   | 0.044                      | 349.1931  |
| 53   | 5      | 48     | 53    | 4       | 49      | E    | 1           | 225233.494   | -0.090                     | 477.4979  |
| 53   | 6      | 48     | 53    | 5       | 49      | E    | 1           | 225233.494   | -0.091                     | 477.4979  |
| 21   | 9      | 12     | 20    | 8       | 13      | A    | 0           | 225276.473   | -0.030                     | 122.8974  |
| 50   | 3      | 47     | 50    | 2       | 48      | A    | 1           | 225565.805   | -0.177                     | 434.0057  |
| 50   | 4      | 47     | 50    | 3       | 48      | A    | 1           | 225565.805   | -0.177                     | 434.0057  |
| 36   | 14     | 23     | 35    | 14      | 22      | A    | 0           | 225807.353   | -0.110                     | 234.8927  |
| 36   | 14     | 22     | 35    | 14      | 21      | A    | 0           | 225810.475   | -0.006                     | 234.8927  |
| 36   | 14     | 22     | 35    | 14      | 21      | E    | 0           | 225810.475   | -0.100                     | 234.8996  |
| 36   | 14     | 23     | 35    | 14      | 22      | E    | 0           | 225812.878   | -0.047                     | 234.8863  |
| 50   | 21     | 29     | 50    | 20      | 30      | E    | 0           | 226021.300   | -0.037                     | 407.0663  |
| 50   | 21     | 30     | 50    | 20      | 31      | E    | 0           | 226050.366   | -0.032                     | 407.0562  |
| 36   | 8      | 29     | 35    | 7       | 28      | A    | 0           | 226064.715   | 0.015                      | 211.0280  |
| 50   | 21     | 29     | 50    | 20      | 30      | A    | 0           | 226070.287   | 0.014                      | 407.0678  |
| 50   | 3      | 47     | 50    | 2       | 48      | E    | 0           | 226520.972   | -0.025                     | 305.4343  |
| 50   | 4      | 47     | 50    | 3       | 48      | E    | 0           | 226520.972   | -0.025                     | 305.4343  |
| 50   | 3      | 47     | 50    | 2       | 48      | A    | 0           | 226554.546   | 0.112                      | 305.4257  |
| 50   | 4      | 47     | 50    | 3       | 48      | A    | 0           | 226554.546   | 0.112                      | 305.4257  |
| 55   | 6      | 49     | 55    | 5       | 50      | E    | 1           | 226647.955   | -0.025                     | 505.4738  |
| 55   | 7      | 49     | 55    | 6       | 50      | E    | 1           | 226647.955   | -0.026                     | 505.4738  |
| 23   | 8      | 15     | 22    | 7       | 16      | E    | 0           | 226669.402   | -0.052                     | 129.2426  |
| 55   | 6      | 49     | 55    | 5       | 50      | A    | 0           | 226673.230   | -0.039                     | 377.1729  |
| 55   | 7      | 49     | 55    | 6       | 50      | A    | 0           | 226673.230   | -0.040                     | 377.1729  |
| 49   | 21     | 28     | 49    | 20      | 29      | E    | 0           | 226706.291   | 0.004                      | 396.6233  |
| 36   | 13     | 24     | 35    | 13      | 23      | A    | 0           | 226753.637   | -0.152                     | 229.9858  |
| 49   | 21     | 28     | 49    | 20      | 29      | A    | 0           | 226754.935   | -0.085                     | 396.6249  |
| 36   | 13     | 24     | 35    | 13      | 23      | E    | 0           | 226773.847   | -0.162                     | 229.9816  |
| 36   | 13     | 23     | 35    | 13      | 22      | E    | 0           | 226775.125   | -0.107                     | 229.9946  |
| 39   | 5      | 34     | 38    | 6       | 33      | A    | 1           | 227343.171   | 0.077                      | 353.5253  |
| 39   | 6      | 34     | 38    | 6       | 33      | A    | 1           | 227345.766   | 0.216                      | 353.5253  |
| 39   | 5      | 34     | 38    | 5       | 33      | A    | 1           | 227347.765   | 0.038                      | 353.5251  |
| 39   | 6      | 34     | 38    | 5       | 33      | A    | 1           | 227350.042   | -0.140                     | 353.5251  |
| 40   | 4      | 36     | 39    | 4       | 35      | A    | 1           | 227390.470   | -0.027                     | 355.9639  |
| 40   | 4      | 36     | 39    | 5       | 35      | A    | 1           | 227390.470   | 0.096                      | 355.9639  |
| 40   | 5      | 36     | 39    | 4       | 35      | A    | 1           | 227390.470   | -0.089                     | 355.9639  |
| 40   | 5      | 36     | 39    | 5       | 35      | A    | 1           | 227390.470   | 0.034                      | 355.9639  |
| 38   | 6      | 32     | 37    | 7       | 31      | A    | 1           | 227394.340   | 0.232                      | 350.5921  |
| 38   | 7      | 32     | 37    | 7       | 31      | A    | 1           | 227460.226   | 0.006                      | 350.5921  |
| 39   | 5      | 34     | 38    | 6       | 33      | E    | 1           | 227482.582   | -0.021                     | 353.2922  |
| 39   | 6      | 34     | 38    | 6       | 33      | E    | 1           | 227485.365   | -0.106                     | 353.2922  |
| 39   | 5      | 34     | 38    | 5       | 33      | E    | 1           | 227487.904   | -0.075                     | 353.2920  |
| 39   | 6      | 34     | 38    | 5       | 33      | E    | 1           | 227490.765   | -0.082                     | 353.2920  |
| 40   | 4      | 36     | 39    | 4       | 35      | E    | 1           | 227505.210   | -0.047                     | 355.7166  |
| 40   | 4      | 36     | 39    | 5       | 35      | E    | 1           | 227505.210   | 0.098                      | 355.7166  |
| 40   | 5      | 36     | 39    | 4       | 35      | E    | 1           | 227505.210   | -0.122                     | 355.7166  |
| 40   | 5      | 36     | 39    | 5       | 35      | E    | 1           | 227505.210   | 0.024                      | 355.7166  |
| 38   | 6      | 32     | 37    | 6       | 31      | A    | 1           | 227512.097   | 0.138                      | 350.5882  |
| 39   | 5      | 34     | 38    | 6       | 33      | E    | 0           | 227513.530   | -0.016                     | 224.9696  |
| 39   | 6      | 34     | 38    | 6       | 33      | E    | 0           | 227516.257   | 0.017                      | 224.9696  |
| 39   | 5      | 34     | 38    | 6       | 33      | A    | 0           | 227517.805   | -0.036                     | 224.9623  |
| 39   | 6      | 34     | 38    | 5       | 33      | E    | 0           | 227521.337   | 0.033                      | 224.9694  |
| 39   | 5      | 34     | 38    | 5       | 33      | A    | 0           | 227522.897   | -0.034                     | 224.9621  |
| 41   | 3      | 38     | 40    | 3       | 37      | A    | 1           | 227524.284   | -0.035                     | 357.9448  |
| 41   | 3      | 38     | 40    | 4       | 37      | A    | 1           | 227524.284   | -0.033                     | 357.9448  |
| 41   | 4      | 38     | 40    | 3       | 37      | A    | 1           | 227524.284   | -0.036                     | 357.9448  |
| 41   | 4      | 38     | 40    | 4       | 37      | A    | 1           | 227524.284   | -0.034                     | 357.9448  |
| 39   | 6      | 34     | 38    | 5       | 33      | A    | 0           | 227525.624   | -0.016                     | 224.9621  |
| 40   | 4      | 36     | 39    | 4       | 35      | E    | 0           | 227541.571   | -0.041                     | 227.3956  |
| 40   | 5      | 36     | 39    | 5       | 35      | E    | 0           | 227541.571   | 0.026                      | 227.3956  |
| 40   | 4      | 36     | 39    | 4       | 35      | A    | 0           | 227545.107   | -0.035                     | 227.3878  |
| 40   | 4      | 36     | 39    | 5       | 35      | A    | 0           | 227545.107   | 0.102                      | 227.3878  |
| 40   | 5      | 36     | 39    | 4       | 35      | A    | 0           | 227545.107   | -0.105                     | 227.3878  |
| 40   | 5      | 36     | 39    | 5       | 35      | A    | 0           | 227545.107   | 0.032                      | 227.3878  |
| 38   | 6      | 32     | 37    | 7       | 31      | E    | 1           | 227552.695   | 0.019                      | 350.3667  |
| 52   | 4      | 48     | 52    | 3       | 49      | A    | 1           | 227572.818   | 0.501                      | 460.2978  |
| 52   | 5      | 48     | 52    | 4       | 49      | A    | 1           | 227572.818   | 0.501                      | 460.2978  |
| 38   | 7      | 32     | 37    | 6       | 31      | A    | 1           | 227578.319   | 0.248                      | 350.5882  |
| 38   | 6      | 32     | 37    | 7       | 31      | E    | 0           | 227580.204   | -0.014                     | 222.0446  |
| 38   | 6      | 32     | 37    | 7       | 31      | A    | 0           | 227585.039   | -0.010                     | 222.0376  |
| 41   | 3      | 38     | 40    | 3       | 37      | E    | 1           | 227615.168   | -0.019                     | 357.6771  |
| 41   | 3      | 38     | 40    | 4       | 37      | E    | 1           | 227615.168   | -0.016                     | 357.6771  |
| 41   | 4      | 38     | 40    | 3       | 37      | E    | 1           | 227615.168   | -0.020                     | 357.6771  |
| 41   | 4      | 38     | 40    | 4       | 37      | E    | 1           | 227615.168   | -0.017                     | 357.6771  |
| 38   | 7      | 32     | 37    | 7       | 31      | E    | 1           | 227628.222   | 0.075                      | 350.3667  |
| 38   | 7      | 32     | 37    | 7       | 31      | E    | 0           | 227651.795   | 0.049                      | 222.0446  |
| 41   | 3      | 38     | 40    | 3       | 37      | E    | 0           | 227656.295   | -0.007                     | 229.3594  |



| $J'$ | $K'_a$ | $K'_c$ | $J''$ | $K''_a$ | $K''_c$ | Sym. | $v_{tCH_3}$ | $\nu_{Obs.}$ | $\nu_{Obs.} - \nu_{Calc.}$ | $E_{low}$ |
|------|--------|--------|-------|---------|---------|------|-------------|--------------|----------------------------|-----------|
| 41   | 4      | 38     | 40    | 4       | 37      | E    | 0           | 227656.295   | -0.005                     | 229.3594  |
| 41   | 3      | 38     | 40    | 3       | 37      | A    | 0           | 227659.093   | -0.000                     | 229.3511  |
| 41   | 3      | 38     | 40    | 4       | 37      | A    | 0           | 227659.093   | 0.002                      | 229.3511  |
| 41   | 4      | 38     | 40    | 3       | 37      | A    | 0           | 227659.093   | -0.001                     | 229.3511  |
| 41   | 4      | 38     | 40    | 4       | 37      | A    | 0           | 227659.093   | 0.001                      | 229.3511  |
| 42   | 2      | 40     | 41    | 2       | 39      | A    | 1           | 227705.324   | 0.001                      | 359.4918  |
| 42   | 2      | 40     | 41    | 3       | 39      | A    | 1           | 227705.324   | 0.001                      | 359.4918  |
| 42   | 3      | 40     | 41    | 2       | 39      | A    | 1           | 227705.324   | 0.001                      | 359.4918  |
| 42   | 3      | 40     | 41    | 3       | 39      | A    | 1           | 227705.324   | 0.001                      | 359.4918  |
| 38   | 7      | 32     | 37    | 6       | 31      | E    | 1           | 227761.934   | 0.094                      | 350.3622  |
| 42   | 2      | 40     | 41    | 2       | 39      | E    | 1           | 227771.729   | -0.017                     | 359.1978  |
| 42   | 2      | 40     | 41    | 3       | 39      | E    | 1           | 227771.729   | -0.017                     | 359.1978  |
| 42   | 3      | 40     | 41    | 2       | 39      | E    | 1           | 227771.729   | -0.017                     | 359.1978  |
| 42   | 3      | 40     | 41    | 3       | 39      | E    | 1           | 227771.729   | -0.017                     | 359.1978  |
| 38   | 7      | 32     | 37    | 6       | 31      | E    | 0           | 227778.841   | 0.013                      | 222.0404  |
| 38   | 7      | 32     | 37    | 6       | 31      | A    | 0           | 227784.580   | 0.030                      | 222.0333  |
| 57   | 7      | 50     | 57    | 6       | 51      | E    | 1           | 227810.997   | 0.044                      | 534.5143  |
| 57   | 8      | 50     | 57    | 7       | 51      | E    | 1           | 227810.997   | 0.036                      | 534.5143  |
| 42   | 2      | 40     | 41    | 2       | 39      | E    | 0           | 227817.529   | -0.004                     | 230.8851  |
| 42   | 3      | 40     | 41    | 3       | 39      | E    | 0           | 227817.529   | -0.004                     | 230.8851  |
| 42   | 2      | 40     | 41    | 2       | 39      | A    | 0           | 227819.581   | 0.009                      | 230.8760  |
| 42   | 2      | 40     | 41    | 3       | 39      | A    | 0           | 227819.581   | 0.009                      | 230.8760  |
| 42   | 3      | 40     | 41    | 2       | 39      | A    | 0           | 227819.581   | 0.009                      | 230.8760  |
| 42   | 3      | 40     | 41    | 3       | 39      | A    | 0           | 227819.581   | 0.009                      | 230.8760  |
| 43   | 1      | 42     | 42    | 1       | 41      | A    | 1           | 227911.284   | 0.023                      | 360.6213  |
| 43   | 1      | 42     | 42    | 2       | 41      | A    | 1           | 227911.284   | 0.023                      | 360.6213  |
| 43   | 2      | 42     | 42    | 1       | 41      | A    | 1           | 227911.284   | 0.023                      | 360.6213  |
| 43   | 2      | 42     | 42    | 2       | 41      | A    | 1           | 227911.284   | 0.023                      | 360.6213  |
| 43   | 1      | 42     | 42    | 1       | 41      | E    | 1           | 227951.377   | -0.021                     | 360.2947  |
| 43   | 1      | 42     | 42    | 2       | 41      | E    | 1           | 227951.377   | -0.021                     | 360.2947  |
| 43   | 2      | 42     | 42    | 1       | 41      | E    | 1           | 227951.377   | -0.021                     | 360.2947  |
| 43   | 2      | 42     | 42    | 2       | 41      | E    | 1           | 227951.377   | -0.021                     | 360.2947  |
| 36   | 12     | 25     | 35    | 12      | 24      | E    | 0           | 227985.043   | -0.061                     | 225.5328  |
| 43   | 1      | 42     | 42    | 1       | 41      | E    | 0           | 228002.214   | -0.038                     | 231.9889  |
| 43   | 2      | 42     | 42    | 2       | 41      | E    | 0           | 228002.214   | -0.038                     | 231.9889  |
| 43   | 1      | 42     | 42    | 1       | 41      | A    | 0           | 228003.490   | 0.005                      | 231.9787  |
| 43   | 1      | 42     | 42    | 2       | 41      | A    | 0           | 228003.490   | 0.005                      | 231.9787  |
| 43   | 2      | 42     | 42    | 1       | 41      | A    | 0           | 228003.490   | 0.005                      | 231.9787  |
| 43   | 2      | 42     | 42    | 2       | 41      | A    | 0           | 228003.490   | 0.005                      | 231.9787  |
| 44   | 0      | 44     | 43    | 0       | 43      | A    | 1           | 228129.996   | 0.094                      | 361.3453  |
| 44   | 0      | 44     | 43    | 1       | 43      | A    | 1           | 228129.996   | 0.094                      | 361.3453  |
| 44   | 1      | 44     | 43    | 0       | 43      | A    | 1           | 228129.996   | 0.094                      | 361.3453  |
| 44   | 1      | 44     | 43    | 1       | 43      | A    | 1           | 228129.996   | 0.094                      | 361.3453  |
| 44   | 0      | 44     | 43    | 0       | 43      | E    | 1           | 228140.829   | -0.026                     | 360.9793  |
| 44   | 1      | 44     | 43    | 1       | 43      | E    | 1           | 228140.829   | -0.026                     | 360.9793  |
| 44   | 0      | 44     | 43    | 0       | 43      | A    | 0           | 228197.697   | -0.191                     | 232.6707  |
| 44   | 0      | 44     | 43    | 1       | 43      | A    | 0           | 228197.697   | -0.191                     | 232.6707  |
| 44   | 1      | 44     | 43    | 0       | 43      | A    | 0           | 228197.697   | -0.191                     | 232.6707  |
| 44   | 0      | 44     | 43    | 0       | 43      | E    | 0           | 228197.697   | 0.153                      | 232.6821  |
| 44   | 1      | 44     | 43    | 1       | 43      | E    | 0           | 228197.697   | 0.153                      | 232.6821  |
| 39   | 9      | 30     | 38    | 10      | 29      | A    | 0           | 228366.605   | -0.066                     | 241.5288  |
| 52   | 4      | 48     | 52    | 3       | 49      | E    | 0           | 228460.929   | 0.039                      | 331.7678  |
| 52   | 5      | 48     | 52    | 4       | 49      | E    | 0           | 228460.929   | 0.039                      | 331.7678  |
| 35   | 10     | 25     | 34    | 10      | 24      | E    | 0           | 228463.886   | 0.005                      | 210.8962  |
| 46   | 21     | 25     | 46    | 20      | 26      | E    | 0           | 228493.514   | -0.059                     | 366.6007  |
| 46   | 21     | 26     | 46    | 20      | 27      | E    | 0           | 228524.251   | 0.053                      | 366.5905  |
| 46   | 21     | 26     | 46    | 20      | 27      | A    | 0           | 228541.726   | -0.024                     | 366.6026  |
| 46   | 21     | 25     | 46    | 20      | 26      | A    | 0           | 228541.726   | -0.023                     | 366.6026  |
| 37   | 7      | 30     | 36    | 7       | 29      | E    | 0           | 228694.472   | -0.040                     | 218.5071  |
| 37   | 23     | 15     | 36    | 23      | 14      | A    | 0           | 228698.103   | -0.200                     | 304.9244  |
| 37   | 23     | 14     | 36    | 23      | 13      | A    | 0           | 228698.103   | -0.200                     | 304.9244  |
| 37   | 23     | 14     | 36    | 23      | 13      | E    | 0           | 228699.263   | 0.001                      | 304.9173  |
| 37   | 7      | 30     | 36    | 7       | 29      | A    | 0           | 228702.664   | -0.001                     | 218.4998  |
| 37   | 7      | 30     | 36    | 7       | 29      | E    | 1           | 228704.332   | -0.070                     | 346.8236  |
| 59   | 8      | 51     | 59    | 7       | 52      | E    | 1           | 228706.699   | 0.189                      | 564.6129  |
| 59   | 9      | 51     | 59    | 8       | 52      | E    | 1           | 228706.699   | 0.150                      | 564.6129  |
| 59   | 8      | 51     | 59    | 7       | 52      | A    | 0           | 228814.650   | -0.032                     | 436.3248  |
| 59   | 9      | 51     | 59    | 8       | 52      | A    | 0           | 228814.650   | -0.068                     | 436.3248  |
| 61   | 22     | 39     | 61    | 21      | 40      | E    | 0           | 228879.594   | -0.035                     | 543.7168  |
| 37   | 22     | 16     | 36    | 22      | 15      | E    | 0           | 228893.563   | 0.032                      | 296.3814  |
| 61   | 22     | 40     | 61    | 21      | 41      | E    | 0           | 228907.520   | -0.076                     | 543.7078  |
| 61   | 22     | 39     | 61    | 21      | 40      | A    | 0           | 228926.591   | -0.047                     | 543.7185  |
| 14   | 13     | 2      | 13    | 12      | 2       | E    | 0           | 228973.249   | 0.020                      | 113.3788  |
| 14   | 13     | 1      | 13    | 12      | 1       | E    | 0           | 228979.344   | -0.058                     | 113.3923  |
| 45   | 21     | 24     | 45    | 20      | 25      | E    | 0           | 229009.058   | -0.043                     | 357.0266  |
| 14   | 13     | 2      | 13    | 12      | 1       | A    | 0           | 229017.131   | 0.002                      | 113.3833  |
| 14   | 13     | 1      | 13    | 12      | 2       | A    | 0           | 229017.131   | 0.002                      | 113.3833  |
| 45   | 21     | 25     | 45    | 20      | 26      | E    | 0           | 229040.003   | -0.044                     | 357.0164  |
| 45   | 21     | 25     | 45    | 20      | 26      | A    | 0           | 229057.049   | -0.062                     | 357.0286  |
| 45   | 21     | 24     | 45    | 20      | 25      | A    | 0           | 229057.049   | -0.061                     | 357.0286  |
| 37   | 21     | 17     | 36    | 21      | 16      | A    | 0           | 229115.342   | -0.120                     | 288.2550  |
| 37   | 21     | 16     | 36    | 21      | 15      | A    | 0           | 229115.342   | -0.120                     | 288.2550  |
| 37   | 21     | 16     | 36    | 21      | 15      | E    | 0           | 229116.634   | 0.018                      | 288.2509  |
| 36   | 11     | 26     | 35    | 11      | 25      | A    | 0           | 229137.910   | -0.026                     | 221.5450  |
| 36   | 11     | 26     | 35    | 11      | 25      | E    | 0           | 229145.426   | 0.001                      | 221.5495  |
| 36   | 10     | 27     | 35    | 10      | 26      | A    | 0           | 229280.066   | -0.079                     | 217.9721  |
| 36   | 10     | 27     | 35    | 10      | 26      | E    | 0           | 229281.298   | 0.050                      | 217.9781  |
| 49   | 2      | 47     | 49    | 1       | 48      | E    | 0           | 229307.524   | -0.164                     | 288.8181  |
| 49   | 3      | 47     | 49    | 2       | 48      | E    | 0           | 229307.524   | -0.164                     | 288.8181  |
| 61   | 9      | 52     | 61    | 8       | 53      | E    | 1           | 229315.780   | 0.335                      | 595.7627  |
| 61   | 10     | 52     | 61    | 9       | 53      | E    | 1           | 229315.780   | 0.163                      | 595.7627  |
| 49   | 2      | 47     | 49    | 1       | 48      | A    | 0           | 229345.320   | 0.141                      | 288.8083  |
| 49   | 3      | 47     | 49    | 2       | 48      | A    | 0           | 229345.320   | 0.141                      | 288.8083  |
| 37   | 20     | 17     | 36    | 20      | 16      | A    | 0           | 229372.960   | -0.040                     | 280.5063  |
| 37   | 20     | 18     | 36    | 20      | 17      | A    | 0           | 229372.960   | -0.040                     | 280.5063  |
| 37   | 20     | 18     | 36    | 20      | 17      | E    | 0           | 229374.306   | -0.009                     | 280.4935  |
| 61   | 9      | 52     | 61    | 8       | 53      | A    | 0           | 229465.213   | 0.097                      | 467.4837  |
| 61   | 10     | 52     | 61    | 9       | 53      | A    | 0           | 229465.213   | -0.060                     | 467.4837  |
| 44   | 21     | 24     | 44    | 20      | 25      | E    | 0           | 229519.760   | 0.013                      | 347.6580  |
| 44   | 21     | 24     | 44    | 20      | 25      | A    | 0           | 229536.305   | -0.054                     | 347.6703  |
| 44   | 21     | 23     | 44    | 20      | 24      | A    | 0           | 229536.305   | -0.054                     | 347.6703  |
| 37   | 19     | 19     | 36    | 19      | 18      | A    | 0           | 229673.532   | -0.026                     | 273.1509  |
| 37   | 19     | 18     | 36    | 19      | 17      | A    | 0           | 229673.532   | -0.026                     | 273.1509  |
| 37   | 19     | 18     | 36    | 19      | 17      | E    | 0           | 229674.979   | 0.075                      | 273.1500  |
| 16   | 12     | 5      | 15    | 11      | 5       | E    | 0           | 229820.108   | 0.010                      | 114.9626  |
| 16   | 12     | 4      | 15    | 11      | 4       | E    | 0           | 229831.816   | 0.032                      | 114.9757  |
| 16   | 12     | 4      | 15    | 11      | 5       | A    | 0           | 229865.879   | 0.017                      | 114.9656  |
| 16   | 12     | 5      | 15    | 11      | 4       | A    | 0           | 229865.879   | 0.017                      | 114.9656  |
| 43   | 21     | 22     | 43    | 20      | 23      | E    | 0           | 229933.874   | -0.065                     | 338.5249  |
| 37   | 8      | 30     | 36    | 7       | 29      | E    | 0           | 229947.867   | -0.065                     | 218.5071  |
| 37   | 8      | 30     | 36    | 7       | 29      | A    | 0           | 229960.876   | 0.009                      | 218.4998  |
| 43   | 21     | 23     | 43    | 20      | 24      | E    | 0           | 229965.465   | 0.012                      | 338.5147  |
| 43   | 21     | 23     | 43    | 20      | 24      | A    | 0           | 229981.618   | -0.026                     | 338.5270  |
| 43   | 21     | 22     | 43    | 20      | 23      | A    | 0           | 229981.618   | -0.026                     | 338.5270  |
| 37   | 18     | 19     | 36    | 18      | 18      | A    | 0           | 230028.194   | -0.008                     | 266.1920  |



| $J'$ | $K'_a$ | $K'_c$ | $J''$ | $K''_a$ | $K''_c$ | Sym. | $v_{tCH_3}$ | $\nu_{Obs.}$ | $\nu_{Obs.} - \nu_{Calc.}$ | $E_{low}$ |
|------|--------|--------|-------|---------|---------|------|-------------|--------------|----------------------------|-----------|
| 37   | 18     | 20     | 36    | 18      | 19      | A    | 0           | 230028.194   | -0.008                     | 266.1920  |
| 37   | 18     | 19     | 36    | 18      | 18      | E    | 0           | 230029.816   | 0.175                      | 266.1927  |
| 70   | 23     | 48     | 70    | 22      | 49      | A    | 0           | 230080.268   | 0.030                      | 676.8002  |
| 60   | 22     | 38     | 60    | 21      | 39      | E    | 0           | 230093.758   | -0.011                     | 530.8674  |
| 60   | 22     | 39     | 60    | 21      | 40      | E    | 0           | 230122.359   | -0.068                     | 530.8584  |
| 60   | 22     | 38     | 60    | 21      | 39      | A    | 0           | 230142.076   | 0.059                      | 530.8693  |
| 60   | 22     | 39     | 60    | 21      | 40      | A    | 0           | 230145.510   | -0.121                     | 530.8691  |
| 54   | 5      | 49     | 54    | 4       | 50      | E    | 0           | 230180.518   | -0.015                     | 359.1810  |
| 54   | 6      | 49     | 54    | 5       | 50      | E    | 0           | 230180.518   | -0.015                     | 359.1810  |
| 54   | 5      | 49     | 54    | 4       | 50      | E    | 1           | 230223.216   | -0.010                     | 487.4775  |
| 54   | 6      | 49     | 54    | 5       | 50      | E    | 1           | 230223.216   | -0.010                     | 487.4775  |
| 42   | 21     | 21     | 42    | 20      | 22      | E    | 0           | 230347.316   | -0.095                     | 329.5962  |
| 42   | 21     | 22     | 42    | 20      | 23      | E    | 0           | 230379.161   | -0.013                     | 329.5860  |
| 42   | 21     | 22     | 42    | 20      | 23      | A    | 0           | 230394.940   | -0.034                     | 329.5985  |
| 42   | 21     | 21     | 42    | 20      | 22      | A    | 0           | 230394.940   | -0.034                     | 329.5985  |
| 37   | 17     | 21     | 36    | 17      | 20      | A    | 0           | 230452.112   | -0.007                     | 259.6333  |
| 37   | 17     | 20     | 36    | 17      | 19      | E    | 0           | 230453.500   | -0.145                     | 259.6356  |
| 37   | 17     | 21     | 36    | 17      | 20      | E    | 0           | 230454.580   | 0.109                      | 259.6230  |
| 51   | 3      | 48     | 51    | 2       | 49      | A    | 1           | 230494.166   | -0.076                     | 443.1399  |
| 51   | 4      | 48     | 51    | 3       | 49      | A    | 1           | 230494.166   | -0.076                     | 443.1399  |
| 18   | 11     | 8      | 17    | 10      | 8       | E    | 0           | 230586.447   | 0.018                      | 117.7842  |
| 18   | 11     | 7      | 17    | 10      | 7       | E    | 0           | 230603.597   | -0.078                     | 117.7967  |
| 18   | 11     | 7      | 17    | 10      | 8       | A    | 0           | 230633.588   | 0.009                      | 117.7855  |
| 41   | 21     | 20     | 41    | 20      | 21      | E    | 0           | 230730.646   | -0.159                     | 320.8817  |
| 22   | 9      | 14     | 21    | 8       | 13      | A    | 0           | 230763.107   | -0.211                     | 127.3068  |
| 41   | 21     | 21     | 41    | 20      | 22      | E    | 0           | 230763.107   | 0.309                      | 320.8714  |
| 41   | 21     | 21     | 41    | 20      | 22      | A    | 0           | 230778.201   | -0.036                     | 320.8839  |
| 41   | 21     | 20     | 41    | 20      | 21      | A    | 0           | 230778.201   | -0.036                     | 320.8839  |
| 22   | 9      | 13     | 21    | 8       | 13      | E    | 0           | 230866.770   | -0.040                     | 127.3163  |
| 37   | 16     | 22     | 36    | 16      | 21      | A    | 0           | 230966.861   | -0.007                     | 253.4803  |
| 37   | 16     | 21     | 36    | 16      | 20      | E    | 0           | 230968.347   | -0.140                     | 253.4842  |
| 37   | 16     | 22     | 36    | 16      | 21      | E    | 0           | 230969.666   | -0.075                     | 253.4712  |
| 22   | 9      | 14     | 21    | 8       | 14      | E    | 0           | 230976.118   | -0.059                     | 127.3012  |
| 40   | 21     | 19     | 40    | 20      | 20      | E    | 0           | 231085.854   | -0.038                     | 312.3807  |
| 20   | 10     | 11     | 19    | 9       | 11      | E    | 0           | 231107.521   | 0.001                      | 121.8756  |
| 40   | 21     | 20     | 40    | 20      | 21      | E    | 0           | 231118.163   | 0.066                      | 312.3795  |
| 40   | 21     | 10     | 19    | 9       | 10      | E    | 0           | 231130.630   | -0.023                     | 121.8872  |
| 40   | 21     | 20     | 40    | 20      | 21      | A    | 0           | 231133.177   | -0.023                     | 312.3830  |
| 40   | 21     | 19     | 40    | 20      | 20      | A    | 0           | 231133.177   | -0.023                     | 312.3830  |
| 22   | 9      | 13     | 21    | 8       | 14      | A    | 0           | 231149.300   | 0.003                      | 127.2957  |
| 20   | 10     | 11     | 19    | 9       | 11      | A    | 0           | 231153.676   | -0.005                     | 121.8753  |
| 20   | 10     | 10     | 19    | 9       | 11      | A    | 0           | 231158.030   | 0.122                      | 121.8751  |
| 36   | 11     | 25     | 35    | 11      | 24      | A    | 0           | 231165.643   | 0.045                      | 221.6441  |
| 36   | 11     | 25     | 35    | 11      | 24      | E    | 0           | 231169.699   | -0.000                     | 221.6495  |
| 59   | 22     | 37     | 59    | 21      | 38      | E    | 0           | 231227.841   | -0.013                     | 518.2431  |
| 59   | 22     | 38     | 59    | 21      | 39      | E    | 0           | 231257.134   | -0.071                     | 518.2341  |
| 59   | 22     | 37     | 59    | 21      | 38      | A    | 0           | 231276.678   | 0.075                      | 518.2451  |
| 59   | 22     | 38     | 59    | 21      | 39      | A    | 0           | 231278.284   | -0.163                     | 518.2451  |
| 39   | 21     | 18     | 39    | 20      | 19      | E    | 0           | 231414.317   | -0.024                     | 304.0929  |
| 39   | 21     | 19     | 39    | 20      | 20      | E    | 0           | 231446.765   | 0.026                      | 304.0826  |
| 39   | 21     | 19     | 39    | 20      | 20      | A    | 0           | 231461.515   | -0.017                     | 304.0953  |
| 39   | 21     | 18     | 39    | 20      | 19      | A    | 0           | 231461.515   | -0.017                     | 304.0953  |
| 51   | 3      | 48     | 51    | 2       | 49      | E    | 0           | 231469.366   | 0.052                      | 314.5726  |
| 51   | 4      | 48     | 51    | 3       | 49      | E    | 0           | 231469.366   | 0.052                      | 314.5726  |
| 51   | 3      | 48     | 51    | 2       | 49      | A    | 0           | 231503.598   | 0.166                      | 314.5641  |
| 51   | 4      | 48     | 51    | 3       | 49      | A    | 0           | 231503.598   | 0.166                      | 314.5641  |
| 37   | 15     | 23     | 36    | 15      | 22      | A    | 0           | 231604.354   | 0.061                      | 247.7405  |
| 37   | 15     | 22     | 36    | 15      | 21      | E    | 0           | 231606.236   | 0.035                      | 247.7459  |
| 37   | 15     | 23     | 36    | 15      | 22      | E    | 0           | 231608.024   | -0.011                     | 247.7327  |
| 56   | 6      | 50     | 56    | 5       | 51      | E    | 1           | 231666.510   | -0.043                     | 515.9613  |
| 56   | 7      | 50     | 56    | 6       | 51      | E    | 1           | 231666.510   | -0.044                     | 515.9613  |
| 56   | 6      | 50     | 56    | 5       | 51      | E    | 0           | 231669.083   | -0.018                     | 387.6676  |
| 56   | 7      | 50     | 56    | 6       | 51      | E    | 0           | 231669.083   | -0.018                     | 387.6676  |
| 56   | 6      | 50     | 56    | 5       | 51      | A    | 0           | 231692.488   | -0.018                     | 387.6627  |
| 56   | 7      | 50     | 56    | 6       | 51      | A    | 0           | 231692.488   | -0.019                     | 387.6627  |
| 38   | 21     | 17     | 38    | 20      | 18      | E    | 0           | 231717.689   | -0.035                     | 296.0177  |
| 38   | 21     | 18     | 38    | 20      | 19      | E    | 0           | 231750.323   | 0.023                      | 296.0075  |
| 38   | 21     | 18     | 38    | 20      | 19      | A    | 0           | 231764.786   | -0.019                     | 296.0202  |
| 38   | 21     | 17     | 38    | 20      | 18      | A    | 0           | 231764.786   | -0.019                     | 296.0202  |
| 69   | 23     | 46     | 69    | 22      | 47      | E    | 0           | 231783.503   | -0.057                     | 661.9455  |
| 69   | 23     | 46     | 69    | 22      | 47      | A    | 0           | 231797.925   | -0.015                     | 661.9485  |
| 69   | 23     | 47     | 69    | 22      | 48      | A    | 0           | 231898.574   | -0.074                     | 661.9447  |
| 37   | 21     | 16     | 37    | 20      | 17      | E    | 0           | 231997.464   | -0.065                     | 288.1548  |
| 37   | 21     | 17     | 37    | 20      | 18      | E    | 0           | 232030.303   | 0.037                      | 288.1446  |
| 37   | 21     | 17     | 37    | 20      | 18      | A    | 0           | 232044.479   | -0.027                     | 288.1573  |
| 37   | 21     | 16     | 37    | 20      | 17      | A    | 0           | 232044.479   | -0.027                     | 288.1573  |
| 38   | 7      | 31     | 37    | 8       | 30      | A    | 1           | 232094.748   | 0.034                      | 354.7138  |
| 38   | 8      | 30     | 37    | 9       | 29      | E    | 1           | 232188.281   | -0.153                     | 358.2619  |
| 38   | 7      | 31     | 37    | 8       | 30      | E    | 1           | 232198.064   | -0.020                     | 354.4960  |
| 35   | 9      | 26     | 34    | 9       | 25      | A    | 0           | 232203.123   | 0.066                      | 208.4797  |
| 35   | 9      | 26     | 34    | 9       | 25      | E    | 0           | 232204.590   | 0.088                      | 208.4882  |
| 38   | 7      | 31     | 37    | 8       | 30      | E    | 0           | 232253.640   | 0.023                      | 226.1773  |
| 36   | 21     | 15     | 36    | 20      | 16      | E    | 0           | 232255.043   | -0.121                     | 280.5037  |
| 38   | 7      | 31     | 37    | 8       | 30      | A    | 0           | 232256.301   | 0.017                      | 226.1705  |
| 36   | 21     | 16     | 36    | 20      | 17      | E    | 0           | 232287.991   | -0.058                     | 280.4935  |
| 36   | 21     | 16     | 36    | 20      | 17      | A    | 0           | 232302.007   | -0.038                     | 280.5063  |
| 36   | 21     | 15     | 36    | 20      | 16      | A    | 0           | 232302.007   | -0.038                     | 280.5063  |
| 38   | 8      | 30     | 37    | 9       | 29      | A    | 0           | 232403.357   | 0.029                      | 229.9412  |
| 37   | 14     | 24     | 36    | 14      | 23      | A    | 0           | 232412.520   | -0.117                     | 242.4248  |
| 37   | 14     | 23     | 36    | 14      | 22      | A    | 0           | 232418.798   | -0.093                     | 242.4250  |
| 37   | 14     | 24     | 36    | 14      | 23      | E    | 0           | 232420.083   | 0.011                      | 242.4186  |
| 36   | 8      | 28     | 35    | 8       | 27      | E    | 0           | 232422.089   | 0.003                      | 214.0154  |
| 36   | 8      | 28     | 35    | 8       | 27      | A    | 0           | 232434.455   | 0.011                      | 214.0071  |
| 40   | 5      | 35     | 39    | 6       | 34      | A    | 1           | 232449.453   | -0.015                     | 361.1087  |
| 40   | 6      | 35     | 39    | 6       | 34      | A    | 1           | 232450.710   | -0.052                     | 361.1087  |
| 40   | 5      | 35     | 39    | 5       | 34      | A    | 1           | 232451.905   | -0.019                     | 361.1086  |
| 40   | 6      | 35     | 39    | 5       | 34      | A    | 1           | 232453.214   | -0.003                     | 361.1086  |
| 35   | 21     | 14     | 35    | 20      | 15      | E    | 0           | 232491.878   | -0.088                     | 273.0640  |
| 39   | 6      | 33     | 38    | 7       | 32      | A    | 1           | 232505.263   | 0.045                      | 358.1793  |
| 41   | 4      | 37     | 40    | 4       | 36      | A    | 1           | 232508.551   | -0.048                     | 363.5488  |
| 41   | 4      | 37     | 40    | 5       | 36      | A    | 1           | 232508.551   | 0.014                      | 363.5489  |
| 41   | 5      | 37     | 40    | 4       | 36      | A    | 1           | 232508.551   | -0.079                     | 363.5488  |
| 41   | 5      | 37     | 40    | 5       | 36      | A    | 1           | 232508.551   | -0.017                     | 363.5489  |
| 35   | 21     | 15     | 35    | 20      | 16      | E    | 0           | 232525.012   | 0.028                      | 273.0538  |
| 35   | 21     | 15     | 35    | 20      | 16      | A    | 0           | 232538.804   | 0.049                      | 273.0666  |
| 35   | 21     | 14     | 35    | 20      | 15      | A    | 0           | 232538.804   | 0.049                      | 273.0666  |
| 39   | 7      | 33     | 38    | 7       | 32      | A    | 1           | 232541.939   | -0.000                     | 358.1793  |
| 39   | 6      | 33     | 38    | 6       | 32      | A    | 1           | 232571.358   | 0.028                      | 358.1771  |
| 40   | 5      | 35     | 39    | 6       | 34      | E    | 1           | 232587.425   | -0.120                     | 360.8803  |
| 40   | 5      | 35     | 39    | 5       | 34      | E    | 1           | 232590.451   | 0.039                      | 360.8802  |
| 40   | 6      | 35     | 39    | 5       | 34      | E    | 1           | 232591.914   | -0.018                     | 360.8802  |
| 39   | 7      | 33     | 38    | 6       | 32      | A    | 1           | 232608.080   | 0.028                      | 358.1771  |
| 40   | 5      | 35     | 39    | 6       | 34      | E    | 0           | 232620.509   | -0.021                     | 232.5587  |
| 40   | 5      | 35     | 39    | 5       | 34      | E    | 0           | 232623.466   | 0.243                      | 232.5586  |
| 40   | 5      | 35     | 39    | 6       | 34      | A    | 0           | 232624.722   | -0.060                     | 232.5516  |
| 40   | 6      | 35     | 39    | 5       | 34      | E    | 0           | 232624.722   | 0.076                      | 232.5586  |



| $J'$ | $K'_a$ | $K'_c$ | $J''$ | $K''_a$ | $K''_c$ | Sym. | $v_{tCH_3}$ | $\nu_{Obs.}$ | $\nu_{Obs.} - \nu_{Calc.}$ | $E_{low}$ |
|------|--------|--------|-------|---------|---------|------|-------------|--------------|----------------------------|-----------|
| 40   | 6      | 35     | 39    | 6       | 34      | A    | 0           | 232626.188   | -0.025                     | 232.5516  |
| 37   | 9      | 29     | 36    | 9       | 28      | E    | 0           | 232626.188   | -0.055                     | 222.1882  |
| 40   | 5      | 35     | 39    | 5       | 34      | A    | 0           | 232627.547   | 0.058                      | 232.5515  |
| 40   | 6      | 35     | 39    | 5       | 34      | A    | 0           | 232628.915   | -0.007                     | 232.5515  |
| 37   | 9      | 29     | 36    | 9       | 28      | A    | 0           | 232630.262   | 0.040                      | 222.1815  |
| 42   | 3      | 39     | 41    | 3       | 38      | A    | 1           | 232647.941   | -0.030                     | 365.5342  |
| 42   | 3      | 39     | 41    | 4       | 38      | A    | 1           | 232647.941   | -0.028                     | 365.5342  |
| 42   | 4      | 39     | 41    | 3       | 38      | A    | 1           | 232647.941   | -0.030                     | 365.5342  |
| 42   | 4      | 39     | 41    | 4       | 38      | A    | 1           | 232647.941   | -0.029                     | 365.5342  |
| 41   | 4      | 37     | 40    | 4       | 36      | E    | 0           | 232660.582   | -0.028                     | 234.9855  |
| 41   | 5      | 37     | 40    | 5       | 36      | E    | 0           | 232660.582   | 0.006                      | 234.9855  |
| 41   | 4      | 37     | 40    | 4       | 36      | A    | 0           | 232664.081   | -0.033                     | 234.9779  |
| 41   | 4      | 37     | 40    | 5       | 36      | A    | 0           | 232664.081   | 0.037                      | 234.9779  |
| 41   | 5      | 37     | 40    | 4       | 36      | A    | 0           | 232664.081   | -0.068                     | 234.9779  |
| 41   | 5      | 37     | 40    | 5       | 36      | A    | 0           | 232664.081   | 0.001                      | 234.9779  |
| 39   | 6      | 33     | 38    | 7       | 32      | E    | 1           | 232665.434   | -0.085                     | 357.9595  |
| 39   | 6      | 33     | 38    | 7       | 32      | E    | 0           | 232694.000   | 0.163                      | 229.6383  |
| 39   | 6      | 33     | 38    | 7       | 32      | A    | 0           | 232698.747   | -0.001                     | 229.6314  |
| 39   | 7      | 33     | 38    | 7       | 32      | E    | 1           | 232707.805   | 0.105                      | 357.9595  |
| 34   | 21     | 13     | 34    | 20      | 14      | E    | 0           | 232709.231   | 0.026                      | 265.8353  |
| 39   | 7      | 33     | 38    | 7       | 32      | E    | 0           | 232733.687   | -0.012                     | 229.6383  |
| 42   | 3      | 39     | 41    | 3       | 38      | E    | 1           | 232738.343   | 0.001                      | 365.2695  |
| 42   | 3      | 39     | 41    | 4       | 38      | E    | 1           | 232738.343   | 0.003                      | 365.2695  |
| 42   | 4      | 39     | 41    | 3       | 38      | E    | 1           | 232738.343   | 0.001                      | 365.2695  |
| 42   | 4      | 39     | 41    | 4       | 38      | E    | 1           | 232738.343   | 0.002                      | 365.2695  |
| 39   | 6      | 33     | 38    | 6       | 32      | E    | 1           | 232740.983   | -0.007                     | 357.9570  |
| 34   | 21     | 14     | 34    | 20      | 15      | E    | 0           | 232742.430   | 0.087                      | 265.8251  |
| 34   | 21     | 14     | 34    | 20      | 15      | A    | 0           | 232755.856   | -0.051                     | 265.8379  |
| 34   | 21     | 13     | 34    | 20      | 14      | A    | 0           | 232755.856   | -0.051                     | 265.8379  |
| 39   | 6      | 33     | 38    | 6       | 32      | A    | 0           | 232770.597   | -0.009                     | 229.6290  |
| 42   | 3      | 39     | 41    | 3       | 38      | E    | 0           | 232781.067   | -0.018                     | 236.9532  |
| 42   | 4      | 39     | 41    | 4       | 38      | E    | 0           | 232781.067   | -0.017                     | 236.9532  |
| 42   | 3      | 39     | 41    | 3       | 38      | A    | 0           | 232783.809   | -0.052                     | 236.9450  |
| 42   | 3      | 39     | 41    | 4       | 38      | A    | 0           | 232783.809   | -0.051                     | 236.9450  |
| 42   | 4      | 39     | 41    | 3       | 38      | A    | 0           | 232783.809   | -0.053                     | 236.9450  |
| 42   | 4      | 39     | 41    | 4       | 38      | A    | 0           | 232783.809   | -0.052                     | 236.9450  |
| 39   | 7      | 33     | 38    | 6       | 32      | E    | 0           | 232805.221   | -0.007                     | 229.6359  |
| 39   | 7      | 33     | 38    | 6       | 32      | A    | 0           | 232810.615   | -0.044                     | 229.6290  |
| 43   | 2      | 41     | 42    | 2       | 40      | A    | 1           | 232831.161   | -0.023                     | 367.0872  |
| 43   | 2      | 41     | 42    | 3       | 40      | A    | 1           | 232831.161   | -0.023                     | 367.0872  |
| 43   | 3      | 41     | 42    | 2       | 40      | A    | 1           | 232831.161   | -0.023                     | 367.0872  |
| 43   | 3      | 41     | 42    | 3       | 40      | A    | 1           | 232831.161   | -0.023                     | 367.0872  |
| 58   | 7      | 51     | 58    | 6       | 52      | E    | 1           | 232866.284   | 0.053                      | 545.5103  |
| 58   | 8      | 51     | 58    | 7       | 52      | E    | 1           | 232866.284   | 0.049                      | 545.5103  |
| 43   | 2      | 41     | 42    | 2       | 40      | E    | 1           | 232897.340   | -0.020                     | 366.7954  |
| 43   | 2      | 41     | 42    | 3       | 40      | E    | 1           | 232897.340   | -0.020                     | 366.7954  |
| 43   | 3      | 41     | 42    | 2       | 40      | E    | 1           | 232897.340   | -0.020                     | 366.7954  |
| 43   | 3      | 41     | 42    | 3       | 40      | E    | 1           | 232897.340   | -0.020                     | 366.7954  |
| 58   | 7      | 51     | 58    | 6       | 52      | E    | 0           | 232913.872   | -0.048                     | 417.2212  |
| 58   | 8      | 51     | 58    | 7       | 52      | E    | 0           | 232913.872   | -0.051                     | 417.2212  |
| 58   | 7      | 51     | 58    | 6       | 52      | A    | 0           | 232933.916   | -0.068                     | 417.2174  |
| 58   | 8      | 51     | 58    | 7       | 52      | A    | 0           | 232933.916   | -0.072                     | 417.2174  |
| 33   | 21     | 13     | 33    | 20      | 14      | E    | 0           | 232941.348   | 0.015                      | 258.8070  |
| 43   | 2      | 41     | 42    | 2       | 40      | E    | 0           | 232944.651   | 0.003                      | 238.4843  |
| 43   | 3      | 41     | 42    | 3       | 40      | E    | 0           | 232944.651   | 0.003                      | 238.4843  |
| 43   | 2      | 41     | 42    | 2       | 40      | A    | 0           | 232946.667   | -0.012                     | 238.4752  |
| 43   | 2      | 41     | 42    | 3       | 40      | A    | 0           | 232946.667   | -0.012                     | 238.4752  |
| 43   | 3      | 41     | 42    | 2       | 40      | A    | 0           | 232946.667   | -0.012                     | 238.4752  |
| 43   | 3      | 41     | 42    | 3       | 40      | A    | 0           | 232946.667   | -0.012                     | 238.4752  |
| 38   | 8      | 31     | 37    | 8       | 30      | E    | 1           | 232984.245   | 0.013                      | 354.4960  |
| 38   | 8      | 31     | 37    | 8       | 30      | E    | 0           | 233004.025   | 0.039                      | 226.1773  |
| 38   | 8      | 31     | 37    | 8       | 30      | A    | 0           | 233009.879   | 0.208                      | 226.1705  |
| 44   | 1      | 43     | 43    | 1       | 42      | A    | 1           | 233037.950   | 0.018                      | 368.2236  |
| 44   | 1      | 43     | 43    | 2       | 42      | A    | 1           | 233037.950   | 0.018                      | 368.2236  |
| 44   | 2      | 43     | 43    | 1       | 42      | A    | 1           | 233037.950   | 0.018                      | 368.2236  |
| 44   | 2      | 43     | 43    | 2       | 42      | A    | 1           | 233037.950   | 0.018                      | 368.2236  |
| 44   | 1      | 43     | 43    | 1       | 42      | E    | 1           | 233077.917   | -0.033                     | 367.8984  |
| 44   | 1      | 43     | 43    | 2       | 42      | E    | 1           | 233077.917   | -0.033                     | 367.8984  |
| 44   | 2      | 43     | 43    | 1       | 42      | E    | 1           | 233077.917   | -0.033                     | 367.8984  |
| 44   | 2      | 43     | 43    | 2       | 42      | E    | 1           | 233077.917   | -0.033                     | 367.8984  |
| 32   | 21     | 11     | 32    | 20      | 12      | E    | 0           | 233089.734   | -0.024                     | 252.0095  |
| 32   | 21     | 12     | 32    | 20      | 13      | E    | 0           | 233123.190   | 0.086                      | 251.9992  |
| 44   | 1      | 43     | 43    | 1       | 42      | E    | 0           | 233130.187   | -0.032                     | 239.5942  |
| 44   | 2      | 43     | 43    | 2       | 42      | E    | 0           | 233130.187   | -0.032                     | 239.5942  |
| 44   | 1      | 43     | 43    | 1       | 42      | A    | 0           | 233131.462   | 0.013                      | 239.5841  |
| 44   | 1      | 43     | 43    | 2       | 42      | A    | 0           | 233131.462   | 0.013                      | 239.5841  |
| 44   | 2      | 43     | 43    | 1       | 42      | A    | 0           | 233131.462   | 0.013                      | 239.5841  |
| 44   | 2      | 43     | 43    | 2       | 42      | A    | 0           | 233131.462   | 0.013                      | 239.5841  |
| 32   | 21     | 12     | 32    | 20      | 13      | A    | 0           | 233136.215   | -0.090                     | 252.0121  |
| 32   | 21     | 11     | 32    | 20      | 12      | A    | 0           | 233136.215   | -0.090                     | 252.0121  |
| 45   | 0      | 45     | 44    | 0       | 44      | A    | 1           | 233256.941   | 0.067                      | 368.9549  |
| 45   | 0      | 45     | 44    | 1       | 44      | A    | 1           | 233256.941   | 0.067                      | 368.9549  |
| 45   | 1      | 45     | 44    | 0       | 44      | A    | 1           | 233256.941   | 0.067                      | 368.9549  |
| 45   | 1      | 45     | 44    | 1       | 44      | A    | 1           | 233256.941   | 0.067                      | 368.9549  |
| 45   | 0      | 45     | 44    | 0       | 44      | E    | 1           | 233267.719   | -0.014                     | 368.5893  |
| 45   | 1      | 45     | 44    | 1       | 44      | E    | 1           | 233267.719   | -0.014                     | 368.5893  |
| 57   | 22     | 35     | 57    | 21      | 36      | E    | 0           | 233279.183   | -0.022                     | 493.6658  |
| 31   | 21     | 11     | 31    | 20      | 12      | E    | 0           | 233288.796   | 0.044                      | 245.4013  |
| 31   | 21     | 11     | 31    | 20      | 12      | A    | 0           | 233301.755   | -0.040                     | 245.4143  |
| 31   | 21     | 10     | 31    | 20      | 11      | A    | 0           | 233301.755   | -0.040                     | 245.4143  |
| 45   | 0      | 45     | 44    | 0       | 44      | A    | 0           | 233325.936   | -0.186                     | 240.2826  |
| 45   | 0      | 45     | 44    | 1       | 44      | A    | 0           | 233325.936   | -0.186                     | 240.2826  |
| 45   | 1      | 45     | 44    | 0       | 44      | A    | 0           | 233325.936   | -0.186                     | 240.2826  |
| 45   | 1      | 45     | 44    | 1       | 44      | A    | 0           | 233325.936   | -0.186                     | 240.2826  |
| 45   | 0      | 45     | 44    | 0       | 44      | E    | 0           | 233325.936   | 0.155                      | 240.2939  |
| 45   | 1      | 45     | 44    | 1       | 44      | E    | 0           | 233325.936   | 0.155                      | 240.2939  |
| 57   | 22     | 35     | 57    | 21      | 36      | A    | 0           | 233328.111   | 0.145                      | 493.6681  |
| 30   | 21     | 9      | 30    | 20      | 10      | E    | 0           | 233405.773   | -0.037                     | 239.0232  |
| 53   | 4      | 49     | 53    | 3       | 50      | E    | 0           | 233425.221   | 0.068                      | 341.4131  |
| 53   | 5      | 49     | 53    | 4       | 50      | E    | 0           | 233425.221   | 0.068                      | 341.4131  |
| 30   | 21     | 10     | 30    | 20      | 11      | E    | 0           | 233439.391   | 0.069                      | 239.0130  |
| 30   | 21     | 10     | 30    | 20      | 11      | A    | 0           | 233452.172   | -0.049                     | 239.0260  |
| 30   | 21     | 9      | 30    | 20      | 10      | A    | 0           | 233452.172   | -0.049                     | 239.0260  |
| 37   | 13     | 25     | 36    | 13      | 24      | A    | 0           | 233455.832   | 0.107                      | 237.5495  |
| 53   | 4      | 49     | 53    | 3       | 50      | A    | 0           | 233455.832   | -0.025                     | 341.4059  |
| 53   | 5      | 49     | 53    | 4       | 50      | A    | 0           | 233455.832   | -0.025                     | 341.4059  |
| 37   | 13     | 24     | 36    | 13      | 23      | E    | 0           | 233499.729   | 0.012                      | 237.5590  |
| 38   | 7      | 31     | 37    | 7       | 30      | E    | 0           | 233507.001   | -0.036                     | 226.1355  |
| 38   | 7      | 31     | 37    | 7       | 30      | A    | 0           | 233514.275   | -0.211                     | 226.1285  |
| 37   | 13     | 24     | 36    | 13      | 23      | A    | 0           | 233522.686   | 0.012                      | 237.5518  |
| 29   | 21     | 8      | 29    | 20      | 9       | E    | 0           | 233542.193   | -0.038                     | 232.8441  |
| 29   | 21     | 9      | 29    | 20      | 10      | E    | 0           | 233575.852   | 0.040                      | 232.8339  |
| 28   | 21     | 7      | 28    | 20      | 8       | E    | 0           | 233665.477   | -0.055                     | 226.8740  |
| 28   | 21     | 8      | 28    | 20      | 9       | A    | 0           | 233711.785   | -0.038                     | 226.8767  |
| 28   | 21     | 7      | 28    | 20      | 8       | A    | 0           | 233711.785   | -0.038                     | 226.8767  |
| 60   | 8      | 52     | 60    | 7       | 53      | E    | 1           | 233807.553   | 0.145                      | 576.1182  |



| $J'$ | $K'_a$ | $K'_c$ | $J''$ | $K''_a$ | $K''_c$ | Sym. | $v_{tCH_3}$ | $\nu_{Obs.}$ | $\nu_{Obs.} - \nu_{Calc.}$ | $E_{low}$ |
|------|--------|--------|-------|---------|---------|------|-------------|--------------|----------------------------|-----------|
| 60   | 9      | 52     | 60    | 8       | 53      | E    | 1           | 233807.553   | 0.124                      | 576.1182  |
| 27   | 21     | 7      | 27    | 20      | 8       | E    | 0           | 233810.496   | 0.177                      | 221.1022  |
| 27   | 21     | 7      | 27    | 20      | 8       | A    | 0           | 233822.828   | -0.032                     | 221.1152  |
| 27   | 21     | 6      | 27    | 20      | 7       | A    | 0           | 233822.828   | -0.032                     | 221.1152  |
| 60   | 8      | 52     | 60    | 7       | 53      | E    | 0           | 233900.011   | -0.041                     | 447.8356  |
| 60   | 9      | 52     | 60    | 8       | 53      | E    | 0           | 233900.011   | -0.060                     | 447.8356  |
| 26   | 21     | 6      | 26    | 20      | 7       | E    | 0           | 233910.258   | 0.144                      | 215.5490  |
| 60   | 8      | 52     | 60    | 7       | 53      | A    | 0           | 233916.710   | -0.098                     | 447.8327  |
| 60   | 9      | 52     | 60    | 8       | 53      | A    | 0           | 233916.710   | -0.116                     | 447.8327  |
| 26   | 21     | 6      | 26    | 20      | 7       | A    | 0           | 233922.574   | 0.017                      | 215.5620  |
| 26   | 21     | 5      | 26    | 20      | 6       | A    | 0           | 233922.574   | 0.017                      | 215.5620  |
| 38   | 8      | 31     | 37    | 7       | 30      | A    | 1           | 233970.357   | 0.027                      | 354.6746  |
| 24   | 8      | 16     | 23    | 7       | 17      | A    | 0           | 234028.163   | 0.063                      | 134.0836  |
| 24   | 21     | 4      | 24    | 20      | 5       | A    | 0           | 234091.136   | -0.077                     | 205.0794  |
| 24   | 21     | 3      | 24    | 20      | 4       | A    | 0           | 234091.136   | -0.077                     | 205.0794  |
| 23   | 21     | 3      | 23    | 20      | 4       | A    | 0           | 234161.708   | -0.010                     | 200.1495  |
| 23   | 21     | 2      | 23    | 20      | 3       | A    | 0           | 234161.708   | -0.010                     | 200.1495  |
| 56   | 22     | 34     | 56    | 21      | 35      | E    | 0           | 234206.591   | 0.001                      | 481.7110  |
| 56   | 22     | 34     | 56    | 21      | 35      | A    | 0           | 234255.253   | 0.095                      | 481.7134  |
| 38   | 8      | 31     | 37    | 7       | 30      | E    | 0           | 234257.420   | 0.014                      | 226.1355  |
| 38   | 8      | 31     | 37    | 7       | 30      | A    | 0           | 234267.865   | -0.007                     | 226.1285  |
| 38   | 8      | 31     | 37    | 7       | 30      | E    | 1           | 234293.172   | 0.032                      | 354.4524  |
| 50   | 2      | 48     | 50    | 1       | 49      | E    | 1           | 234427.855   | -0.011                     | 425.9117  |
| 50   | 3      | 48     | 50    | 2       | 49      | E    | 1           | 234427.855   | -0.011                     | 425.9117  |
| 62   | 9      | 53     | 62    | 8       | 54      | E    | 1           | 234472.745   | 0.387                      | 607.7784  |
| 62   | 10     | 53     | 62    | 9       | 54      | E    | 1           | 234472.745   | 0.295                      | 607.7784  |
| 37   | 12     | 26     | 36    | 12      | 25      | A    | 0           | 234732.492   | -0.040                     | 233.1357  |
| 37   | 12     | 26     | 36    | 12      | 25      | E    | 0           | 234756.520   | -0.116                     | 233.1376  |
| 38   | 23     | 16     | 37    | 23      | 15      | A    | 0           | 234990.544   | -0.112                     | 312.5529  |
| 38   | 23     | 15     | 37    | 23      | 14      | A    | 0           | 234990.544   | -0.112                     | 312.5529  |
| 38   | 23     | 15     | 37    | 23      | 14      | E    | 0           | 234991.673   | -0.029                     | 312.5459  |
| 64   | 10     | 54     | 64    | 9       | 55      | A    | 0           | 235032.037   | 0.048                      | 512.2190  |
| 64   | 11     | 54     | 64    | 10      | 55      | A    | 0           | 235032.037   | -0.301                     | 512.2190  |
| 55   | 22     | 33     | 55    | 21      | 34      | E    | 0           | 235074.329   | -0.027                     | 469.9776  |
| 55   | 22     | 34     | 55    | 21      | 35      | E    | 0           | 235106.045   | -0.026                     | 469.9685  |
| 15   | 13     | 3      | 14    | 12      | 3       | E    | 0           | 235119.551   | 0.012                      | 116.2544  |
| 55   | 22     | 33     | 55    | 21      | 34      | A    | 0           | 235122.727   | -0.037                     | 469.9802  |
| 15   | 13     | 2      | 14    | 12      | 2       | E    | 0           | 235125.687   | -0.056                     | 116.2679  |
| 15   | 13     | 3      | 14    | 12      | 2       | A    | 0           | 235163.482   | 0.030                      | 116.2589  |
| 15   | 13     | 2      | 14    | 12      | 3       | A    | 0           | 235163.482   | 0.030                      | 116.2589  |
| 55   | 5      | 50     | 55    | 4       | 51      | A    | 0           | 235193.733   | 0.029                      | 369.3276  |
| 55   | 6      | 50     | 55    | 5       | 51      | A    | 0           | 235193.733   | 0.029                      | 369.3276  |
| 38   | 22     | 16     | 37    | 22      | 15      | A    | 0           | 235201.322   | -0.065                     | 304.0300  |
| 38   | 22     | 17     | 37    | 22      | 16      | A    | 0           | 235201.322   | -0.065                     | 304.0300  |
| 38   | 22     | 16     | 37    | 22      | 15      | E    | 0           | 235202.507   | -0.030                     | 304.0244  |
| 55   | 5      | 50     | 55    | 4       | 51      | E    | 1           | 235209.225   | -0.117                     | 497.6280  |
| 55   | 6      | 50     | 55    | 5       | 51      | E    | 1           | 235209.225   | -0.117                     | 497.6280  |
| 37   | 12     | 25     | 36    | 12      | 24      | E    | 0           | 235268.909   | -0.031                     | 233.1634  |
| 37   | 12     | 25     | 36    | 12      | 24      | A    | 0           | 235283.511   | -0.004                     | 233.1584  |
| 52   | 3      | 49     | 52    | 2       | 50      | A    | 1           | 235421.188   | -0.152                     | 452.4450  |
| 52   | 4      | 49     | 52    | 3       | 50      | A    | 1           | 235421.188   | -0.152                     | 452.4450  |
| 38   | 21     | 18     | 37    | 21      | 17      | A    | 0           | 235443.061   | -0.066                     | 295.8975  |
| 38   | 21     | 17     | 37    | 21      | 16      | A    | 0           | 235443.061   | -0.066                     | 295.8975  |
| 38   | 21     | 17     | 37    | 21      | 16      | E    | 0           | 235444.335   | -0.047                     | 295.8934  |
| 37   | 10     | 28     | 36    | 10      | 27      | A    | 0           | 235461.508   | -0.011                     | 225.6200  |
| 37   | 10     | 28     | 36    | 10      | 27      | E    | 0           | 235461.508   | 0.028                      | 225.6261  |
| 38   | 20     | 18     | 37    | 20      | 17      | A    | 0           | 235722.787   | -0.041                     | 288.1573  |
| 38   | 20     | 19     | 37    | 20      | 18      | A    | 0           | 235722.787   | -0.041                     | 288.1573  |
| 38   | 20     | 18     | 37    | 20      | 17      | E    | 0           | 235724.196   | 0.009                      | 288.1548  |
| 37   | 11     | 27     | 36    | 11      | 26      | A    | 0           | 235813.682   | -0.018                     | 229.1883  |
| 37   | 11     | 27     | 36    | 11      | 26      | E    | 0           | 235819.001   | 0.036                      | 229.1930  |
| 54   | 22     | 32     | 54    | 21      | 33      | E    | 0           | 235886.395   | -0.014                     | 458.4648  |
| 54   | 22     | 33     | 54    | 21      | 34      | E    | 0           | 235918.630   | 0.015                      | 458.4557  |
| 54   | 22     | 32     | 54    | 21      | 33      | A    | 0           | 235934.487   | -0.008                     | 458.4675  |
| 17   | 12     | 6      | 16    | 11      | 6       | E    | 0           | 235951.878   | 0.006                      | 118.2576  |
| 17   | 12     | 5      | 16    | 11      | 5       | E    | 0           | 235963.618   | -0.009                     | 118.2707  |
| 17   | 12     | 5      | 16    | 11      | 6       | A    | 0           | 235997.675   | 0.004                      | 118.2605  |
| 17   | 12     | 6      | 16    | 11      | 5       | A    | 0           | 235997.675   | 0.004                      | 118.2605  |
| 38   | 19     | 20     | 37    | 19      | 19      | A    | 0           | 236049.616   | -0.008                     | 280.8120  |
| 38   | 19     | 19     | 37    | 19      | 18      | A    | 0           | 236049.616   | -0.008                     | 280.8120  |
| 38   | 19     | 19     | 37    | 19      | 18      | E    | 0           | 236051.193   | 0.110                      | 280.8111  |
| 23   | 9      | 15     | 22    | 8       | 14      | A    | 0           | 236231.512   | 0.017                      | 131.9361  |
| 23   | 9      | 14     | 22    | 8       | 14      | E    | 0           | 236401.231   | 0.088                      | 131.9448  |
| 52   | 3      | 49     | 52    | 2       | 50      | E    | 0           | 236416.216   | -0.180                     | 323.8818  |
| 52   | 4      | 49     | 52    | 3       | 50      | E    | 0           | 236416.216   | -0.180                     | 323.8818  |
| 38   | 18     | 20     | 37    | 18      | 19      | A    | 0           | 236435.754   | -0.029                     | 273.8649  |
| 38   | 18     | 21     | 37    | 18      | 20      | A    | 0           | 236435.754   | -0.029                     | 273.8649  |
| 52   | 3      | 49     | 52    | 2       | 50      | A    | 0           | 236451.276   | 0.090                      | 323.8734  |
| 52   | 4      | 49     | 52    | 3       | 50      | A    | 0           | 236451.276   | 0.090                      | 323.8734  |
| 36   | 10     | 26     | 35    | 10      | 25      | A    | 0           | 236537.511   | -0.059                     | 218.5097  |
| 36   | 10     | 26     | 35    | 10      | 25      | E    | 0           | 236546.993   | -0.095                     | 218.5169  |
| 52   | 3      | 49     | 52    | 2       | 50      | E    | 1           | 236552.902   | -0.133                     | 452.1749  |
| 52   | 4      | 49     | 52    | 3       | 50      | E    | 1           | 236552.902   | -0.133                     | 452.1749  |
| 66   | 23     | 44     | 66    | 22      | 45      | E    | 0           | 236657.914   | -0.100                     | 618.7560  |
| 66   | 23     | 43     | 66    | 22      | 44      | A    | 0           | 236669.613   | 0.013                      | 618.7666  |
| 19   | 11     | 9      | 18    | 10      | 9       | E    | 0           | 236674.916   | 0.022                      | 121.5055  |
| 53   | 22     | 32     | 53    | 21      | 33      | E    | 0           | 236678.926   | -0.045                     | 447.1628  |
| 57   | 6      | 51     | 57    | 5       | 52      | E    | 1           | 236680.017   | 0.020                      | 526.6195  |
| 57   | 7      | 51     | 57    | 6       | 52      | E    | 1           | 236680.017   | 0.020                      | 526.6195  |
| 57   | 6      | 51     | 57    | 5       | 52      | E    | 0           | 236682.916   | -0.042                     | 398.3280  |
| 57   | 7      | 51     | 57    | 6       | 52      | E    | 0           | 236682.916   | -0.042                     | 398.3280  |
| 37   | 8      | 29     | 36    | 8       | 28      | E    | 0           | 236685.171   | -0.051                     | 221.7682  |
| 66   | 23     | 44     | 66    | 22      | 45      | A    | 0           | 236686.498   | -0.065                     | 618.7660  |
| 19   | 11     | 8      | 18    | 10      | 8       | E    | 0           | 236692.242   | -0.061                     | 121.5180  |
| 53   | 22     | 31     | 53    | 21      | 32      | A    | 0           | 236694.079   | -0.070                     | 447.1747  |
| 37   | 8      | 29     | 36    | 8       | 28      | A    | 0           | 236697.915   | -0.013                     | 221.7603  |
| 57   | 6      | 51     | 57    | 5       | 52      | A    | 0           | 236706.806   | -0.006                     | 398.3232  |
| 57   | 7      | 51     | 57    | 6       | 52      | A    | 0           | 236706.806   | -0.006                     | 398.3232  |
| 19   | 11     | 8      | 18    | 10      | 9       | A    | 0           | 236722.281   | 0.119                      | 121.5068  |
| 37   | 8      | 29     | 36    | 8       | 28      | E    | 1           | 236739.593   | 0.078                      | 350.0711  |
| 23   | 9      | 15     | 22    | 8       | 15      | E    | 0           | 236781.765   | -0.049                     | 131.9201  |
| 38   | 17     | 22     | 37    | 17      | 21      | A    | 0           | 236898.235   | -0.027                     | 267.3204  |
| 38   | 17     | 21     | 37    | 17      | 20      | E    | 0           | 236899.775   | -0.139                     | 267.3227  |
| 38   | 17     | 22     | 37    | 17      | 21      | E    | 0           | 236900.988   | 0.150                      | 267.3102  |
| 23   | 9      | 14     | 22    | 8       | 15      | A    | 0           | 237021.635   | -0.016                     | 131.9137  |
| 21   | 10     | 12     | 20    | 9       | 12      | E    | 0           | 237085.005   | 0.089                      | 126.0357  |
| 21   | 10     | 11     | 20    | 9       | 11      | E    | 0           | 237108.333   | -0.006                     | 126.0473  |
| 21   | 10     | 12     | 20    | 9       | 11      | A    | 0           | 237127.915   | -0.022                     | 126.0354  |
| 21   | 10     | 11     | 20    | 9       | 12      | A    | 0           | 237138.926   | 0.053                      | 126.0351  |
| 52   | 22     | 30     | 52    | 21      | 31      | E    | 0           | 237357.269   | -0.044                     | 436.0981  |
| 52   | 22     | 31     | 52    | 21      | 32      | E    | 0           | 237390.373   | -0.024                     | 436.0890  |
| 52   | 22     | 30     | 52    | 21      | 31      | A    | 0           | 237404.910   | -0.002                     | 436.1011  |
| 38   | 16     | 23     | 37    | 16      | 22      | A    | 0           | 237461.333   | 0.005                      | 261.1845  |
| 38   | 16     | 22     | 37    | 16      | 21      | E    | 0           | 237463.133   | 0.035                      | 261.1885  |
| 38   | 16     | 23     | 37    | 16      | 22      | E    | 0           | 237464.464   | -0.029                     | 261.1755  |
| 39   | 7      | 32     | 38    | 8       | 31      | A    | 1           | 237470.170   | 0.062                      | 362.4790  |



| $J'$ | $K'_a$ | $K'_c$ | $J''$ | $K''_a$ | $K''_c$ | Sym. | $v_{tCH_3}$ | $\nu_{Obs.}$ | $\nu_{Obs.} - \nu_{Calc.}$ | $E_{low}$ |
|------|--------|--------|-------|---------|---------|------|-------------|--------------|----------------------------|-----------|
| 41   | 5      | 36     | 40    | 6       | 35      | A    | 1           | 237557.318   | 0.012                      | 368.8624  |
| 41   | 6      | 36     | 40    | 5       | 35      | A    | 1           | 237559.267   | -0.008                     | 368.8624  |
| 40   | 6      | 34     | 39    | 7       | 33      | A    | 1           | 237606.060   | 0.091                      | 365.9361  |
| 40   | 7      | 34     | 39    | 7       | 33      | A    | 1           | 237626.098   | -0.081                     | 365.9361  |
| 42   | 4      | 38     | 41    | 4       | 37      | A    | 1           | 237627.370   | -0.012                     | 371.3045  |
| 42   | 4      | 38     | 41    | 5       | 37      | A    | 1           | 237627.370   | 0.019                      | 371.3045  |
| 42   | 5      | 38     | 41    | 4       | 37      | A    | 1           | 237627.370   | -0.028                     | 371.3045  |
| 42   | 5      | 38     | 41    | 5       | 37      | A    | 1           | 237627.370   | 0.003                      | 371.3045  |
| 40   | 6      | 34     | 39    | 6       | 33      | A    | 1           | 237642.743   | 0.053                      | 365.9349  |
| 39   | 7      | 32     | 38    | 8       | 31      | E    | 0           | 237650.186   | -0.020                     | 233.9495  |
| 39   | 7      | 32     | 38    | 8       | 31      | A    | 0           | 237654.076   | -0.019                     | 233.9429  |
| 40   | 7      | 34     | 39    | 6       | 33      | A    | 1           | 237662.924   | 0.024                      | 365.9349  |
| 41   | 5      | 36     | 40    | 6       | 35      | E    | 1           | 237693.908   | -0.023                     | 368.6386  |
| 41   | 6      | 36     | 40    | 5       | 35      | E    | 1           | 237696.263   | 0.012                      | 368.6385  |
| 41   | 5      | 36     | 40    | 6       | 35      | E    | 0           | 237728.993   | 0.024                      | 240.3182  |
| 41   | 6      | 36     | 40    | 5       | 35      | E    | 0           | 237731.113   | -0.027                     | 240.3181  |
| 41   | 5      | 36     | 40    | 6       | 35      | A    | 0           | 237733.150   | -0.028                     | 240.3112  |
| 41   | 6      | 36     | 40    | 5       | 35      | A    | 0           | 237735.365   | 0.004                      | 240.3111  |
| 42   | 4      | 38     | 41    | 4       | 37      | E    | 1           | 237740.303   | -0.031                     | 371.0648  |
| 42   | 4      | 38     | 41    | 5       | 37      | E    | 1           | 237740.303   | 0.007                      | 371.0648  |
| 42   | 5      | 38     | 41    | 4       | 37      | E    | 1           | 237740.303   | -0.050                     | 371.0648  |
| 42   | 5      | 38     | 41    | 5       | 37      | E    | 1           | 237740.303   | -0.013                     | 371.0648  |
| 40   | 6      | 34     | 39    | 7       | 33      | E    | 1           | 237766.233   | -0.031                     | 365.7218  |
| 43   | 3      | 40     | 42    | 3       | 39      | A    | 1           | 237771.721   | -0.023                     | 373.2945  |
| 43   | 3      | 40     | 42    | 4       | 39      | A    | 1           | 237771.721   | -0.023                     | 373.2945  |
| 43   | 4      | 40     | 42    | 3       | 39      | A    | 1           | 237771.721   | -0.024                     | 373.2945  |
| 43   | 4      | 40     | 42    | 4       | 39      | A    | 1           | 237771.721   | -0.023                     | 373.2945  |
| 42   | 4      | 38     | 41    | 4       | 37      | E    | 0           | 237780.292   | -0.023                     | 242.7462  |
| 42   | 5      | 38     | 41    | 5       | 37      | E    | 0           | 237780.292   | -0.005                     | 242.7462  |
| 42   | 4      | 38     | 41    | 4       | 37      | A    | 0           | 237783.771   | -0.020                     | 242.7387  |
| 42   | 4      | 38     | 41    | 5       | 37      | A    | 0           | 237783.771   | 0.015                      | 242.7388  |
| 42   | 5      | 38     | 41    | 4       | 37      | A    | 0           | 237783.771   | -0.038                     | 242.7387  |
| 42   | 5      | 38     | 41    | 5       | 37      | A    | 0           | 237783.771   | -0.002                     | 242.7388  |
| 40   | 7      | 34     | 39    | 7       | 33      | E    | 1           | 237789.605   | -0.021                     | 365.7218  |
| 40   | 6      | 34     | 39    | 7       | 33      | E    | 0           | 237796.019   | -0.038                     | 237.4014  |
| 40   | 6      | 34     | 39    | 7       | 33      | A    | 1           | 237800.963   | -0.020                     | 237.3947  |
| 40   | 6      | 34     | 39    | 6       | 33      | E    | 1           | 237808.469   | 0.023                      | 365.7204  |
| 40   | 7      | 34     | 39    | 7       | 33      | A    | 0           | 237822.908   | -0.197                     | 237.3947  |
| 40   | 7      | 34     | 39    | 6       | 33      | E    | 1           | 237831.805   | -0.003                     | 365.7204  |
| 40   | 6      | 34     | 39    | 6       | 33      | E    | 0           | 237835.918   | -0.001                     | 237.4001  |
| 40   | 6      | 34     | 39    | 6       | 33      | A    | 0           | 237841.117   | 0.082                      | 237.3934  |
| 40   | 7      | 34     | 39    | 6       | 33      | E    | 0           | 237857.919   | -0.013                     | 237.4001  |
| 43   | 3      | 40     | 42    | 3       | 39      | E    | 1           | 237861.618   | -0.014                     | 373.0328  |
| 43   | 3      | 40     | 42    | 4       | 39      | E    | 1           | 237861.618   | -0.014                     | 373.0328  |
| 43   | 4      | 40     | 42    | 3       | 39      | E    | 1           | 237861.618   | -0.015                     | 373.0328  |
| 43   | 4      | 40     | 42    | 4       | 39      | E    | 1           | 237861.618   | -0.014                     | 373.0328  |
| 40   | 7      | 34     | 39    | 6       | 33      | A    | 0           | 237863.092   | -0.067                     | 237.3934  |
| 39   | 8      | 32     | 38    | 8       | 31      | A    | 1           | 237882.201   | 0.030                      | 362.4790  |
| 43   | 3      | 40     | 42    | 3       | 39      | E    | 0           | 237906.006   | 0.004                      | 244.7180  |
| 43   | 4      | 40     | 42    | 4       | 39      | E    | 0           | 237906.006   | 0.005                      | 244.7180  |
| 43   | 3      | 40     | 42    | 3       | 39      | A    | 0           | 237908.758   | -0.005                     | 244.7098  |
| 43   | 3      | 40     | 42    | 4       | 39      | A    | 0           | 237908.758   | -0.005                     | 244.7098  |
| 43   | 4      | 40     | 42    | 3       | 39      | A    | 0           | 237908.758   | -0.006                     | 244.7098  |
| 43   | 4      | 40     | 42    | 4       | 39      | A    | 0           | 237908.758   | -0.005                     | 244.7098  |
| 44   | 2      | 42     | 43    | 2       | 41      | A    | 1           | 237956.972   | -0.006                     | 374.8536  |
| 44   | 2      | 42     | 43    | 3       | 41      | A    | 1           | 237956.972   | -0.006                     | 374.8536  |
| 44   | 3      | 42     | 43    | 2       | 41      | A    | 1           | 237956.972   | -0.006                     | 374.8536  |
| 44   | 3      | 42     | 43    | 3       | 41      | A    | 1           | 237956.972   | -0.006                     | 374.8536  |
| 59   | 7      | 52     | 59    | 6       | 53      | E    | 0           | 237962.833   | -0.033                     | 428.3902  |
| 59   | 8      | 52     | 59    | 7       | 53      | E    | 0           | 237962.833   | -0.035                     | 428.3902  |
| 59   | 7      | 52     | 59    | 6       | 53      | A    | 0           | 237983.262   | -0.064                     | 428.3865  |
| 59   | 8      | 52     | 59    | 7       | 53      | A    | 0           | 237983.262   | -0.065                     | 428.3865  |
| 38   | 9      | 30     | 37    | 9       | 29      | E    | 0           | 238019.498   | -0.026                     | 229.9478  |
| 44   | 2      | 42     | 43    | 2       | 41      | E    | 1           | 238022.880   | -0.032                     | 374.5640  |
| 44   | 2      | 42     | 43    | 3       | 41      | E    | 1           | 238022.880   | -0.032                     | 374.5640  |
| 44   | 3      | 42     | 43    | 2       | 41      | E    | 1           | 238022.880   | -0.032                     | 374.5640  |
| 44   | 3      | 42     | 43    | 3       | 41      | E    | 1           | 238022.880   | -0.032                     | 374.5640  |
| 65   | 23     | 42     | 65    | 22      | 43      | E    | 0           | 238028.075   | -0.022                     | 604.8290  |
| 51   | 22     | 30     | 51    | 21      | 31      | E    | 0           | 238055.903   | 0.016                      | 425.2338  |
| 51   | 22     | 30     | 51    | 21      | 31      | A    | 0           | 238069.819   | 0.035                      | 425.2460  |
| 44   | 2      | 42     | 43    | 2       | 41      | E    | 0           | 238071.688   | -0.014                     | 246.2545  |
| 44   | 3      | 42     | 43    | 3       | 41      | E    | 0           | 238071.688   | -0.014                     | 246.2545  |
| 44   | 2      | 42     | 43    | 2       | 41      | A    | 0           | 238073.710   | -0.016                     | 246.2455  |
| 44   | 2      | 42     | 43    | 3       | 41      | A    | 0           | 238073.710   | -0.016                     | 246.2455  |
| 44   | 3      | 42     | 43    | 2       | 41      | A    | 0           | 238073.710   | -0.016                     | 246.2455  |
| 44   | 3      | 42     | 43    | 3       | 41      | A    | 0           | 238073.710   | -0.016                     | 246.2455  |
| 65   | 23     | 43     | 65    | 22      | 44      | A    | 0           | 238082.258   | -0.103                     | 604.8314  |
| 39   | 8      | 32     | 38    | 8       | 31      | E    | 0           | 238092.875   | 0.024                      | 233.9495  |
| 39   | 8      | 32     | 38    | 8       | 31      | A    | 0           | 238098.602   | -0.007                     | 233.9429  |
| 45   | 1      | 44     | 44    | 1       | 43      | A    | 1           | 238164.503   | 0.022                      | 375.9969  |
| 45   | 1      | 44     | 44    | 2       | 43      | A    | 1           | 238164.503   | 0.022                      | 375.9969  |
| 45   | 2      | 44     | 44    | 1       | 43      | A    | 1           | 238164.503   | 0.022                      | 375.9969  |
| 45   | 2      | 44     | 44    | 2       | 43      | A    | 1           | 238164.503   | 0.022                      | 375.9969  |
| 45   | 1      | 44     | 44    | 1       | 43      | E    | 1           | 238204.367   | -0.017                     | 375.6730  |
| 45   | 1      | 44     | 44    | 2       | 43      | E    | 1           | 238204.367   | -0.017                     | 375.6730  |
| 45   | 2      | 44     | 44    | 1       | 43      | E    | 1           | 238204.367   | -0.017                     | 375.6730  |
| 45   | 2      | 44     | 44    | 2       | 43      | E    | 1           | 238204.367   | -0.017                     | 375.6730  |
| 45   | 1      | 44     | 44    | 1       | 43      | E    | 0           | 238258.038   | -0.029                     | 247.3706  |
| 45   | 2      | 44     | 44    | 2       | 43      | E    | 0           | 238258.038   | -0.029                     | 247.3706  |
| 45   | 1      | 44     | 44    | 1       | 43      | A    | 0           | 238259.311   | 0.018                      | 247.3605  |
| 45   | 1      | 44     | 44    | 2       | 43      | A    | 0           | 238259.311   | 0.018                      | 247.3605  |
| 45   | 2      | 44     | 44    | 1       | 43      | A    | 0           | 238259.311   | 0.018                      | 247.3605  |
| 45   | 2      | 44     | 44    | 2       | 43      | A    | 0           | 238259.311   | 0.018                      | 247.3605  |
| 46   | 0      | 46     | 45    | 0       | 45      | A    | 1           | 238383.797   | 0.081                      | 376.7355  |
| 46   | 0      | 46     | 45    | 1       | 45      | A    | 1           | 238383.797   | 0.081                      | 376.7355  |
| 46   | 1      | 46     | 45    | 0       | 45      | A    | 1           | 238383.797   | 0.081                      | 376.7355  |
| 46   | 1      | 46     | 45    | 1       | 45      | A    | 1           | 238383.797   | 0.081                      | 376.7355  |
| 54   | 4      | 50     | 54    | 3       | 51      | E    | 0           | 238387.385   | 0.006                      | 351.2293  |
| 54   | 5      | 50     | 54    | 4       | 51      | E    | 0           | 238387.385   | 0.006                      | 351.2293  |
| 39   | 7      | 32     | 38    | 7       | 31      | E    | 1           | 238392.261   | -0.072                     | 362.2413  |
| 46   | 0      | 46     | 45    | 0       | 45      | E    | 1           | 238394.471   | -0.012                     | 376.3703  |
| 46   | 1      | 46     | 45    | 1       | 45      | E    | 1           | 238394.471   | -0.012                     | 376.3703  |
| 39   | 7      | 32     | 38    | 7       | 31      | E    | 0           | 238400.560   | -0.015                     | 233.9244  |
| 39   | 7      | 32     | 38    | 7       | 31      | A    | 0           | 238407.990   | 0.508                      | 233.9177  |
| 54   | 4      | 50     | 54    | 3       | 51      | A    | 0           | 238418.670   | 0.004                      | 351.2222  |
| 54   | 5      | 50     | 54    | 4       | 51      | A    | 0           | 238418.670   | 0.004                      | 351.2222  |
| 46   | 0      | 46     | 45    | 0       | 45      | A    | 0           | 238454.042   | -0.185                     | 248.0655  |
| 46   | 0      | 46     | 45    | 1       | 45      | A    | 0           | 238454.042   | -0.185                     | 248.0655  |
| 46   | 1      | 46     | 45    | 0       | 45      | A    | 0           | 238454.042   | -0.185                     | 248.0655  |
| 46   | 1      | 46     | 45    | 1       | 45      | A    | 0           | 238454.042   | -0.185                     | 248.0655  |
| 46   | 0      | 46     | 45    | 0       | 45      | E    | 0           | 238454.042   | 0.153                      | 248.0769  |
| 46   | 1      | 46     | 45    | 1       | 45      | E    | 0           | 238454.042   | 0.153                      | 248.0769  |
| 54   | 4      | 50     | 54    | 3       | 51      | E    | 1           | 238477.001   | -0.144                     | 479.5228  |
| 54   | 5      | 50     | 54    | 4       | 51      | E    | 1           | 238477.001   | -0.144                     | 479.5228  |
| 39   | 8      | 32     | 38    | 7       | 31      | A    | 1           | 238583.195   | 0.157                      | 362.4556  |
| 36   | 9      | 27     | 35    | 9       | 26      | E    | 0           | 238628.714   | -0.004                     | 216.2337  |



| $J'$ | $K'_a$ | $K'_c$ | $J''$ | $K''_a$ | $K''_c$ | Sym. | $v_{tCH_3}$ | $\nu_{Obs.}$ | $\nu_{Obs.} - \nu_{Calc.}$ | $E_{low}$ |
|------|--------|--------|-------|---------|---------|------|-------------|--------------|----------------------------|-----------|
| 36   | 9      | 27     | 35    | 9       | 26      | A    | 0           | 238631.161   | 0.214                      | 216.2251  |
| 50   | 22     | 28     | 50    | 21      | 29      | E    | 0           | 238644.149   | -0.210                     | 414.6055  |
| 50   | 22     | 29     | 50    | 21      | 30      | E    | 0           | 238678.220   | 0.021                      | 414.5964  |
| 50   | 22     | 28     | 50    | 21      | 29      | A    | 0           | 238691.474   | -0.034                     | 414.6087  |
| 50   | 22     | 29     | 50    | 21      | 30      | A    | 0           | 238691.474   | -0.036                     | 414.6087  |
| 39   | 8      | 32     | 38    | 7       | 31      | E    | 0           | 238843.238   | 0.017                      | 233.9244  |
| 39   | 8      | 32     | 38    | 7       | 31      | A    | 0           | 238851.983   | -0.012                     | 233.9177  |
| 39   | 8      | 32     | 38    | 7       | 31      | E    | 1           | 238857.566   | 0.024                      | 362.2413  |
| 61   | 8      | 53     | 61    | 7       | 54      | E    | 1           | 238898.658   | 0.223                      | 587.7939  |
| 61   | 9      | 53     | 61    | 8       | 54      | E    | 1           | 238898.658   | 0.212                      | 587.7939  |
| 37   | 11     | 26     | 36    | 11      | 25      | A    | 0           | 238921.046   | -0.110                     | 229.3550  |
| 37   | 11     | 26     | 36    | 11      | 25      | E    | 0           | 238928.768   | -0.085                     | 229.3605  |
| 61   | 8      | 53     | 61    | 7       | 54      | E    | 0           | 238992.198   | -0.028                     | 459.5139  |
| 61   | 9      | 53     | 61    | 8       | 54      | E    | 0           | 238992.198   | -0.038                     | 459.5139  |
| 38   | 14     | 25     | 37    | 14      | 24      | A    | 0           | 239051.926   | 0.077                      | 250.1772  |
| 38   | 14     | 24     | 37    | 14      | 23      | E    | 0           | 239060.320   | 0.006                      | 250.1844  |
| 38   | 14     | 25     | 37    | 14      | 24      | E    | 0           | 239062.778   | 0.094                      | 250.1713  |
| 38   | 14     | 24     | 37    | 14      | 23      | A    | 0           | 239064.418   | -0.038                     | 250.1776  |
| 51   | 2      | 49     | 51    | 1       | 50      | E    | 0           | 239180.772   | 0.049                      | 306.5944  |
| 51   | 3      | 49     | 51    | 2       | 50      | E    | 0           | 239180.772   | 0.049                      | 306.5944  |
| 51   | 2      | 49     | 51    | 1       | 50      | A    | 0           | 239219.891   | 0.133                      | 306.5846  |
| 51   | 3      | 49     | 51    | 2       | 50      | A    | 0           | 239219.891   | 0.133                      | 306.5846  |
| 49   | 22     | 27     | 49    | 21      | 28      | E    | 0           | 239225.669   | -0.040                     | 404.1854  |
| 49   | 22     | 28     | 49    | 21      | 29      | E    | 0           | 239259.907   | 0.021                      | 404.1762  |
| 49   | 22     | 27     | 49    | 21      | 28      | A    | 0           | 239272.618   | -0.033                     | 404.1886  |
| 49   | 22     | 28     | 49    | 21      | 29      | A    | 0           | 239272.618   | -0.034                     | 404.1886  |
| 64   | 23     | 41     | 64    | 22      | 42      | E    | 0           | 239337.709   | -0.071                     | 591.1214  |
| 64   | 23     | 42     | 64    | 22      | 43      | E    | 0           | 239368.992   | -0.144                     | 591.1134  |
| 64   | 23     | 41     | 64    | 22      | 42      | A    | 0           | 239384.662   | 0.102                      | 591.1242  |
| 64   | 23     | 42     | 64    | 22      | 43      | A    | 0           | 239389.412   | 0.061                      | 591.1240  |
| 40   | 9      | 31     | 39    | 10      | 30      | A    | 0           | 239651.350   | -0.014                     | 249.7781  |
| 40   | 9      | 31     | 39    | 10      | 30      | E    | 0           | 239686.659   | 0.039                      | 249.7840  |
| 39   | 8      | 31     | 38    | 9       | 30      | A    | 0           | 239714.005   | -0.058                     | 237.8808  |
| 39   | 8      | 31     | 38    | 9       | 30      | E    | 0           | 239721.488   | -0.001                     | 237.8873  |
| 63   | 9      | 54     | 63    | 8       | 55      | E    | 0           | 239754.553   | -0.032                     | 491.6928  |
| 63   | 10     | 54     | 63    | 9       | 55      | E    | 0           | 239754.553   | -0.076                     | 491.6928  |
| 48   | 22     | 27     | 48    | 21      | 28      | E    | 0           | 239803.270   | -0.047                     | 393.9727  |
| 48   | 22     | 26     | 48    | 21      | 27      | A    | 0           | 239815.537   | -0.034                     | 393.9852  |
| 48   | 22     | 27     | 48    | 21      | 28      | A    | 0           | 239815.537   | -0.035                     | 393.9852  |
| 56   | 5      | 51     | 56    | 4       | 52      | A    | 0           | 240177.044   | 0.076                      | 379.6512  |
| 56   | 6      | 51     | 56    | 5       | 52      | A    | 0           | 240177.044   | 0.076                      | 379.6512  |
| 38   | 13     | 26     | 37    | 13      | 25      | A    | 0           | 240195.482   | -0.036                     | 245.3368  |
| 38   | 13     | 26     | 37    | 13      | 25      | E    | 0           | 240234.975   | -0.013                     | 245.3343  |
| 47   | 22     | 25     | 47    | 21      | 26      | E    | 0           | 240275.870   | -0.046                     | 383.9944  |
| 42   | 10     | 32     | 41    | 11      | 31      | A    | 0           | 240279.871   | -0.073                     | 270.6749  |
| 38   | 13     | 25     | 37    | 13      | 24      | E    | 0           | 240288.912   | 0.089                      | 245.3478  |
| 47   | 22     | 26     | 47    | 21      | 27      | E    | 0           | 240310.674   | -0.021                     | 383.9852  |
| 38   | 13     | 25     | 37    | 13      | 24      | A    | 0           | 240320.034   | -0.063                     | 245.3413  |
| 47   | 22     | 25     | 47    | 21      | 26      | A    | 0           | 240322.443   | -0.032                     | 383.9978  |
| 47   | 22     | 26     | 47    | 21      | 27      | A    | 0           | 240322.443   | -0.032                     | 383.9978  |
| 14   | 14     | 0      | 13    | 13      | 1       | A    | 0           | 240446.932   | -0.002                     | 118.1489  |
| 14   | 14     | 1      | 13    | 13      | 0       | A    | 0           | 240446.932   | -0.002                     | 118.1489  |
| 63   | 23     | 41     | 63    | 22      | 42      | E    | 0           | 240595.774   | -0.103                     | 577.6319  |
| 46   | 22     | 24     | 46    | 21      | 25      | E    | 0           | 240748.981   | -0.054                     | 374.2224  |
| 46   | 22     | 25     | 46    | 21      | 26      | E    | 0           | 240784.048   | -0.033                     | 374.2133  |
| 46   | 22     | 24     | 46    | 21      | 25      | A    | 0           | 240795.380   | -0.037                     | 374.2260  |
| 46   | 22     | 25     | 46    | 21      | 26      | A    | 0           | 240795.380   | -0.037                     | 374.2260  |
| 38   | 8      | 30     | 37    | 8       | 29      | E    | 0           | 240950.049   | -0.023                     | 229.6631  |
| 38   | 8      | 30     | 37    | 8       | 29      | A    | 0           | 240962.203   | -0.001                     | 229.6557  |
| 38   | 8      | 30     | 37    | 8       | 29      | E    | 1           | 241000.798   | 0.059                      | 357.9679  |
| 45   | 22     | 23     | 45    | 21      | 24      | E    | 0           | 241190.037   | -0.071                     | 364.6655  |
| 45   | 22     | 24     | 45    | 21      | 25      | E    | 0           | 241225.412   | 0.009                      | 364.6564  |
| 45   | 22     | 23     | 45    | 21      | 24      | A    | 0           | 241236.290   | -0.034                     | 364.6691  |
| 45   | 22     | 24     | 45    | 21      | 25      | A    | 0           | 241236.290   | -0.034                     | 364.6691  |
| 16   | 13     | 4      | 15    | 12      | 4       | E    | 0           | 241263.171   | 0.038                      | 119.3375  |
| 16   | 13     | 3      | 15    | 12      | 3       | E    | 0           | 241269.309   | -0.066                     | 119.3510  |
| 39   | 23     | 17     | 38    | 23      | 16      | A    | 0           | 241292.069   | -0.097                     | 320.3914  |
| 39   | 23     | 16     | 38    | 23      | 15      | A    | 0           | 241292.069   | -0.097                     | 320.3914  |
| 39   | 23     | 16     | 38    | 23      | 15      | E    | 0           | 241293.196   | -0.109                     | 320.3844  |
| 16   | 13     | 4      | 15    | 12      | 3       | A    | 0           | 241307.062   | -0.000                     | 119.3420  |
| 16   | 13     | 3      | 15    | 12      | 4       | A    | 0           | 241307.062   | -0.000                     | 119.3420  |
| 53   | 4      | 50     | 53    | 3       | 51      | A    | 0           | 241397.863   | 0.106                      | 333.3537  |
| 24   | 9      | 16     | 23    | 8       | 15      | A    | 0           | 241400.797   | -0.001                     | 136.7951  |
| 38   | 10     | 29     | 37    | 10      | 28      | E    | 0           | 241470.705   | -0.072                     | 233.4802  |
| 38   | 10     | 29     | 37    | 10      | 28      | A    | 0           | 241471.965   | 0.010                      | 233.4742  |
| 53   | 3      | 50     | 53    | 2       | 51      | E    | 1           | 241500.536   | -0.116                     | 461.6531  |
| 53   | 4      | 50     | 53    | 3       | 51      | E    | 1           | 241500.536   | -0.116                     | 461.6531  |
| 39   | 22     | 17     | 38    | 22      | 16      | A    | 0           | 241520.145   | -0.099                     | 311.8755  |
| 39   | 22     | 18     | 38    | 22      | 17      | A    | 0           | 241520.145   | -0.099                     | 311.8755  |
| 39   | 22     | 17     | 38    | 22      | 16      | E    | 0           | 241521.396   | -0.097                     | 311.8699  |
| 38   | 12     | 27     | 37    | 12      | 26      | A    | 0           | 241527.298   | -0.037                     | 240.9655  |
| 38   | 12     | 27     | 37    | 12      | 26      | E    | 0           | 241542.606   | -0.143                     | 240.9682  |
| 44   | 22     | 22     | 44    | 21      | 23      | E    | 0           | 241600.889   | -0.054                     | 355.3231  |
| 44   | 22     | 23     | 44    | 21      | 24      | E    | 0           | 241636.516   | 0.050                      | 355.3139  |
| 44   | 22     | 22     | 44    | 21      | 23      | A    | 0           | 241646.961   | -0.041                     | 355.3268  |
| 44   | 22     | 23     | 44    | 21      | 24      | A    | 0           | 241646.961   | -0.041                     | 355.3268  |
| 58   | 6      | 52     | 58    | 5       | 53      | E    | 1           | 241688.653   | 0.006                      | 537.4484  |
| 58   | 7      | 52     | 58    | 6       | 53      | E    | 1           | 241688.653   | 0.006                      | 537.4484  |
| 58   | 6      | 52     | 58    | 5       | 53      | A    | 0           | 241716.494   | -0.024                     | 409.1546  |
| 58   | 7      | 52     | 58    | 6       | 53      | A    | 0           | 241716.494   | -0.024                     | 409.1546  |
| 62   | 23     | 40     | 62    | 22      | 41      | E    | 0           | 241745.163   | -0.095                     | 564.3755  |
| 39   | 21     | 19     | 38    | 21      | 18      | A    | 0           | 241781.990   | -0.108                     | 303.7510  |
| 39   | 21     | 18     | 38    | 21      | 17      | A    | 0           | 241781.990   | -0.108                     | 303.7510  |
| 39   | 21     | 18     | 38    | 21      | 17      | E    | 0           | 241783.501   | 0.042                      | 303.7470  |
| 43   | 22     | 21     | 43    | 21      | 22      | E    | 0           | 241983.212   | -0.028                     | 346.1947  |
| 43   | 22     | 22     | 43    | 21      | 23      | E    | 0           | 242018.925   | -0.048                     | 346.1855  |
| 43   | 22     | 21     | 43    | 21      | 22      | A    | 0           | 242029.042   | -0.108                     | 346.1984  |
| 43   | 22     | 22     | 43    | 21      | 23      | A    | 0           | 242029.042   | -0.108                     | 346.1984  |
| 18   | 12     | 7      | 17    | 11      | 7       | E    | 0           | 242075.296   | 0.022                      | 121.7617  |
| 39   | 20     | 19     | 38    | 20      | 18      | A    | 0           | 242085.414   | 0.043                      | 296.0202  |
| 39   | 20     | 20     | 38    | 20      | 19      | A    | 0           | 242085.414   | 0.043                      | 296.0202  |
| 18   | 12     | 6      | 17    | 11      | 6       | E    | 0           | 242086.994   | -0.122                     | 121.7748  |
| 39   | 20     | 20     | 38    | 20      | 19      | E    | 0           | 242086.994   | 0.039                      | 296.0075  |
| 18   | 12     | 6      | 17    | 11      | 7       | A    | 0           | 242121.195   | 0.073                      | 121.7647  |
| 18   | 12     | 7      | 17    | 11      | 6       | A    | 0           | 242121.195   | 0.074                      | 121.7647  |
| 25   | 8      | 17     | 24    | 7       | 18      | E    | 0           | 242355.573   | 0.006                      | 139.1521  |
| 25   | 8      | 17     | 24    | 7       | 18      | A    | 0           | 242368.384   | 0.001                      | 139.1435  |
| 42   | 22     | 21     | 42    | 21      | 22      | E    | 0           | 242374.533   | 0.007                      | 337.2706  |
| 42   | 22     | 20     | 42    | 21      | 21      | A    | 0           | 242384.382   | 0.011                      | 337.2836  |
| 42   | 22     | 21     | 42    | 21      | 22      | A    | 0           | 242384.382   | 0.011                      | 337.2836  |
| 39   | 19     | 21     | 38    | 19      | 20      | A    | 0           | 242440.102   | -0.038                     | 288.6858  |
| 39   | 19     | 20     | 38    | 19      | 19      | A    | 0           | 242440.102   | -0.038                     | 288.6858  |
| 38   | 12     | 26     | 37    | 12      | 25      | A    | 0           | 242458.951   | -0.003                     | 241.0066  |
| 24   | 9      | 16     | 23    | 8       | 16      | E    | 0           | 242595.517   | 0.006                      | 136.7590  |
| 42   | 5      | 37     | 41    | 6       | 36      | A    | 1           | 242666.552   | -0.068                     | 376.7865  |
| 42   | 6      | 37     | 41    | 5       | 36      | A    | 1           | 242667.561   | -0.087                     | 376.7865  |



| $J'$ | $K'_a$ | $K'_c$ | $J''$ | $K''_a$ | $K''_c$ | Sym. | $v_{tCH_3}$ | $\nu_{Obs.}$ | $\nu_{Obs.} - \nu_{Calc.}$ | $E_{low}$ |
|------|--------|--------|-------|---------|---------|------|-------------|--------------|----------------------------|-----------|
| 41   | 6      | 35     | 40    | 7       | 34      | A    | 1           | 242702.568   | 0.029                      | 373.8625  |
| 41   | 22     | 20     | 41    | 21      | 21      | E    | 0           | 242704.646   | 0.004                      | 328.5689  |
| 41   | 22     | 19     | 41    | 21      | 20      | A    | 0           | 242714.112   | -0.064                     | 328.5819  |
| 41   | 22     | 20     | 41    | 21      | 21      | A    | 0           | 242714.112   | -0.064                     | 328.5819  |
| 40   | 7      | 33     | 39    | 8       | 32      | A    | 1           | 242716.296   | -0.040                     | 370.4139  |
| 41   | 7      | 35     | 40    | 6       | 34      | A    | 1           | 242733.805   | 0.025                      | 373.8618  |
| 20   | 11     | 10     | 19    | 10      | 10      | E    | 0           | 242743.697   | 0.001                      | 125.4387  |
| 43   | 4      | 39     | 42    | 4       | 38      | A    | 1           | 242746.705   | -0.033                     | 379.2309  |
| 43   | 4      | 39     | 42    | 5       | 38      | A    | 1           | 242746.705   | -0.017                     | 379.2309  |
| 43   | 5      | 39     | 42    | 4       | 38      | A    | 1           | 242746.705   | -0.040                     | 379.2309  |
| 43   | 5      | 39     | 42    | 5       | 38      | A    | 1           | 242746.705   | -0.025                     | 379.2309  |
| 20   | 11     | 9      | 19    | 10      | 9       | E    | 0           | 242761.249   | -0.055                     | 125.4511  |
| 20   | 11     | 10     | 19    | 10      | 9       | A    | 0           | 242791.031   | 0.049                      | 125.4399  |
| 42   | 5      | 37     | 41    | 6       | 36      | E    | 1           | 242801.797   | -0.016                     | 376.5672  |
| 42   | 6      | 37     | 41    | 5       | 36      | E    | 1           | 242802.992   | -0.040                     | 376.5672  |
| 61   | 23     | 39     | 61    | 22      | 40      | E    | 0           | 242822.744   | -0.080                     | 551.3434  |
| 42   | 5      | 37     | 41    | 6       | 36      | E    | 0           | 242838.936   | 0.035                      | 248.2480  |
| 42   | 6      | 37     | 41    | 5       | 36      | E    | 0           | 242839.976   | -0.062                     | 248.2479  |
| 42   | 5      | 37     | 41    | 6       | 36      | A    | 0           | 242843.041   | -0.026                     | 248.2411  |
| 42   | 6      | 37     | 41    | 5       | 36      | A    | 0           | 242844.207   | -0.004                     | 248.2411  |
| 43   | 4      | 39     | 42    | 4       | 38      | E    | 1           | 242858.792   | -0.038                     | 378.9949  |
| 43   | 4      | 39     | 42    | 5       | 38      | E    | 1           | 242858.792   | -0.019                     | 378.9949  |
| 43   | 5      | 39     | 42    | 4       | 38      | E    | 1           | 242858.792   | -0.048                     | 378.9949  |
| 43   | 5      | 39     | 42    | 5       | 38      | E    | 1           | 242858.792   | -0.029                     | 378.9949  |
| 39   | 18     | 21     | 38    | 18      | 20      | A    | 0           | 242860.086   | 0.071                      | 281.7515  |
| 39   | 18     | 22     | 38    | 18      | 21      | A    | 0           | 242860.086   | 0.071                      | 281.7515  |
| 41   | 6      | 35     | 40    | 7       | 34      | E    | 1           | 242861.818   | -0.013                     | 373.6536  |
| 40   | 7      | 33     | 39    | 8       | 32      | E    | 1           | 242872.159   | -0.008                     | 370.2087  |
| 41   | 7      | 35     | 40    | 7       | 34      | E    | 1           | 242874.681   | 0.019                      | 373.6536  |
| 41   | 6      | 35     | 40    | 6       | 34      | E    | 1           | 242885.088   | -0.105                     | 373.6528  |
| 41   | 6      | 35     | 40    | 7       | 34      | E    | 0           | 242893.520   | 0.012                      | 245.3342  |
| 44   | 3      | 41     | 43    | 3       | 40      | A    | 1           | 242895.556   | -0.053                     | 381.2257  |
| 44   | 3      | 41     | 43    | 4       | 40      | A    | 1           | 242895.556   | -0.053                     | 381.2257  |
| 44   | 4      | 41     | 43    | 3       | 40      | A    | 1           | 242895.556   | -0.053                     | 381.2257  |
| 44   | 4      | 41     | 43    | 4       | 40      | A    | 1           | 242895.556   | -0.053                     | 381.2257  |
| 41   | 6      | 35     | 40    | 7       | 34      | A    | 0           | 242898.300   | -0.112                     | 245.3277  |
| 43   | 4      | 39     | 42    | 4       | 38      | E    | 0           | 242900.597   | -0.017                     | 250.6777  |
| 43   | 5      | 39     | 42    | 5       | 38      | E    | 0           | 242900.597   | -0.008                     | 250.6777  |
| 43   | 4      | 39     | 42    | 4       | 38      | A    | 0           | 242904.049   | -0.015                     | 250.6704  |
| 43   | 4      | 39     | 42    | 5       | 38      | A    | 0           | 242904.049   | 0.003                      | 250.6704  |
| 43   | 5      | 39     | 42    | 4       | 38      | A    | 0           | 242904.049   | -0.024                     | 250.6704  |
| 43   | 5      | 39     | 42    | 5       | 38      | A    | 0           | 242904.049   | -0.006                     | 250.6704  |
| 41   | 7      | 35     | 40    | 7       | 34      | E    | 0           | 242905.483   | -0.079                     | 245.3342  |
| 40   | 7      | 33     | 39    | 8       | 32      | E    | 0           | 242909.527   | -0.133                     | 241.8914  |
| 41   | 7      | 35     | 40    | 7       | 34      | A    | 0           | 242910.724   | 0.196                      | 245.3277  |
| 40   | 7      | 33     | 39    | 8       | 32      | A    | 0           | 242914.265   | -0.023                     | 241.8850  |
| 41   | 6      | 35     | 40    | 6       | 34      | E    | 0           | 242915.536   | 0.015                      | 245.3335  |
| 41   | 6      | 35     | 40    | 6       | 34      | A    | 0           | 242920.532   | -0.002                     | 245.3269  |
| 41   | 7      | 35     | 40    | 6       | 34      | E    | 0           | 242927.578   | 0.004                      | 245.3335  |
| 41   | 7      | 35     | 40    | 6       | 34      | A    | 0           | 242932.653   | 0.001                      | 245.3269  |
| 24   | 9      | 15     | 23    | 8       | 16      | A    | 0           | 242945.335   | -0.064                     | 136.7519  |
| 40   | 22     | 18     | 40    | 21      | 19      | E    | 0           | 242974.439   | -0.045                     | 320.0889  |
| 44   | 3      | 41     | 43    | 3       | 40      | E    | 1           | 242985.009   | -0.016                     | 380.9671  |
| 44   | 3      | 41     | 43    | 4       | 40      | E    | 1           | 242985.009   | -0.016                     | 380.9671  |
| 44   | 4      | 41     | 43    | 3       | 40      | E    | 1           | 242985.009   | -0.016                     | 380.9671  |
| 44   | 4      | 41     | 43    | 4       | 40      | E    | 1           | 242985.009   | -0.016                     | 380.9671  |
| 40   | 22     | 19     | 40    | 21      | 20      | E    | 0           | 243010.803   | 0.053                      | 320.0797  |
| 24   | 9      | 15     | 23    | 8       | 16      | E    | 0           | 243012.968   | -0.037                     | 136.7590  |
| 22   | 10     | 13     | 21    | 9       | 13      | E    | 0           | 243017.660   | -0.089                     | 130.4119  |
| 40   | 22     | 18     | 40    | 21      | 19      | A    | 0           | 243019.959   | -0.037                     | 320.0928  |
| 40   | 22     | 19     | 40    | 21      | 20      | A    | 0           | 243019.959   | -0.037                     | 320.0928  |
| 44   | 3      | 41     | 43    | 3       | 40      | E    | 0           | 243030.999   | -0.021                     | 252.6536  |
| 44   | 4      | 41     | 43    | 4       | 40      | E    | 0           | 243030.999   | -0.021                     | 252.6536  |
| 44   | 3      | 41     | 43    | 3       | 40      | A    | 0           | 243033.756   | -0.011                     | 252.6456  |
| 44   | 3      | 41     | 43    | 4       | 40      | A    | 0           | 243033.756   | -0.011                     | 252.6456  |
| 44   | 4      | 41     | 43    | 3       | 40      | A    | 0           | 243033.756   | -0.011                     | 252.6456  |
| 44   | 4      | 41     | 43    | 4       | 40      | A    | 0           | 243033.756   | -0.011                     | 252.6456  |
| 22   | 10     | 12     | 21    | 9       | 12      | E    | 0           | 243041.047   | 0.036                      | 130.4235  |
| 22   | 10     | 13     | 21    | 9       | 12      | A    | 0           | 243052.878   | -0.012                     | 130.4118  |
| 22   | 10     | 12     | 21    | 9       | 13      | A    | 0           | 243079.719   | 0.104                      | 130.4110  |
| 45   | 2      | 43     | 44    | 2       | 42      | A    | 1           | 243082.667   | -0.030                     | 382.7910  |
| 45   | 2      | 43     | 44    | 3       | 42      | A    | 1           | 243082.667   | -0.030                     | 382.7910  |
| 45   | 3      | 43     | 44    | 2       | 42      | A    | 1           | 243082.667   | -0.030                     | 382.7910  |
| 45   | 3      | 43     | 44    | 3       | 42      | A    | 1           | 243082.667   | -0.030                     | 382.7910  |
| 40   | 7      | 33     | 39    | 7       | 32      | A    | 1           | 243128.506   | 0.107                      | 370.4002  |
| 40   | 8      | 33     | 39    | 8       | 32      | E    | 1           | 243143.854   | -0.009                     | 370.2087  |
| 45   | 2      | 43     | 44    | 2       | 42      | E    | 1           | 243148.364   | -0.028                     | 382.5036  |
| 45   | 2      | 43     | 44    | 3       | 42      | E    | 1           | 243148.364   | -0.028                     | 382.5036  |
| 45   | 3      | 43     | 44    | 2       | 42      | E    | 1           | 243148.364   | -0.028                     | 382.5036  |
| 45   | 3      | 43     | 44    | 3       | 42      | E    | 1           | 243148.364   | -0.028                     | 382.5036  |
| 40   | 8      | 33     | 39    | 8       | 32      | E    | 0           | 243167.509   | 0.119                      | 241.8914  |
| 45   | 2      | 43     | 44    | 2       | 42      | E    | 0           | 243198.683   | -0.003                     | 254.1957  |
| 45   | 3      | 43     | 44    | 3       | 42      | E    | 0           | 243198.683   | -0.003                     | 254.1957  |
| 45   | 2      | 43     | 44    | 2       | 42      | A    | 0           | 243200.694   | -0.008                     | 254.1868  |
| 45   | 2      | 43     | 44    | 3       | 42      | A    | 0           | 243200.694   | -0.008                     | 254.1868  |
| 45   | 3      | 43     | 44    | 2       | 42      | A    | 0           | 243200.694   | -0.008                     | 254.1868  |
| 45   | 3      | 43     | 44    | 3       | 42      | A    | 0           | 243200.694   | -0.008                     | 254.1868  |
| 39   | 22     | 17     | 39    | 21      | 18      | E    | 0           | 243257.795   | 0.000                      | 311.8120  |
| 39   | 9      | 31     | 38    | 9       | 30      | E    | 1           | 243281.401   | -0.018                     | 366.2007  |
| 46   | 1      | 45     | 45    | 1       | 44      | A    | 1           | 243290.908   | 0.003                      | 383.9413  |
| 46   | 1      | 45     | 45    | 2       | 44      | A    | 1           | 243290.908   | 0.003                      | 383.9413  |
| 46   | 2      | 45     | 45    | 1       | 44      | A    | 1           | 243290.908   | 0.003                      | 383.9413  |
| 46   | 2      | 45     | 45    | 2       | 44      | A    | 1           | 243290.908   | 0.003                      | 383.9413  |
| 39   | 22     | 18     | 39    | 21      | 19      | E    | 0           | 243294.135   | -0.076                     | 311.8029  |
| 39   | 22     | 17     | 39    | 21      | 18      | A    | 0           | 243303.235   | 0.045                      | 311.8160  |
| 39   | 22     | 18     | 39    | 21      | 19      | A    | 0           | 243303.235   | 0.045                      | 311.8160  |
| 39   | 9      | 31     | 38    | 9       | 30      | A    | 0           | 243308.566   | 0.031                      | 237.8808  |
| 46   | 1      | 45     | 45    | 1       | 44      | E    | 1           | 243330.680   | -0.012                     | 383.6187  |
| 46   | 1      | 45     | 45    | 2       | 44      | E    | 1           | 243330.680   | -0.012                     | 383.6187  |
| 46   | 2      | 45     | 45    | 1       | 44      | E    | 1           | 243330.680   | -0.012                     | 383.6187  |
| 46   | 2      | 45     | 45    | 2       | 44      | E    | 1           | 243330.680   | -0.012                     | 383.6187  |
| 40   | 7      | 33     | 39    | 7       | 32      | E    | 1           | 243337.331   | -0.046                     | 370.1932  |
| 55   | 4      | 51     | 55    | 3       | 52      | E    | 0           | 243347.721   | 0.039                      | 361.2164  |
| 55   | 5      | 51     | 55    | 4       | 52      | E    | 0           | 243347.721   | 0.039                      | 361.2164  |
| 40   | 7      | 33     | 39    | 7       | 32      | E    | 0           | 243352.277   | -0.028                     | 241.8766  |
| 40   | 7      | 33     | 39    | 7       | 32      | A    | 0           | 243358.761   | -0.041                     | 241.8701  |
| 39   | 17     | 23     | 38    | 17      | 22      | A    | 0           | 243363.924   | -0.011                     | 275.2225  |
| 39   | 17     | 22     | 38    | 17      | 21      | E    | 0           | 243365.608   | -0.115                     | 275.2249  |
| 39   | 17     | 23     | 38    | 17      | 22      | E    | 0           | 243366.692   | -0.060                     | 275.2123  |
| 40   | 8      | 33     | 39    | 7       | 32      | A    | 1           | 243367.742   | 0.209                      | 370.4002  |
| 55   | 4      | 51     | 55    | 3       | 52      | A    | 0           | 243379.616   | 0.072                      | 361.2094  |
| 55   | 5      | 51     | 55    | 4       | 52      | A    | 0           | 243379.616   | 0.072                      | 361.2094  |
| 46   | 1      | 45     | 45    | 1       | 44      | E    | 0           | 243385.755   | -0.035                     | 255.3180  |
| 46   | 2      | 45     | 45    | 2       | 44      | E    | 0           | 243385.755   | -0.035                     | 255.3180  |
| 46   | 1      | 45     | 45    | 1       | 44      | A    | 0           | 243387.031   | 0.018                      | 255.3080  |
| 46   | 1      | 45     | 45    | 2       | 44      | A    | 0           | 243387.031   | 0.018                      | 255.3080  |



| $J'$ | $K'_a$ | $K'_c$ | $J''$ | $K''_a$ | $K''_c$ | Sym. | $v_{tCH_3}$ | $\nu_{Obs.}$ | $\nu_{Obs.} - \nu_{Calc.}$ | $E_{low}$ |
|------|--------|--------|-------|---------|---------|------|-------------|--------------|----------------------------|-----------|
| 46   | 2      | 45     | 45    | 1       | 44      | A    | 0           | 243387.031   | 0.018                      | 255.3080  |
| 46   | 2      | 45     | 45    | 2       | 44      | A    | 0           | 243387.031   | 0.018                      | 255.3080  |
| 55   | 4      | 51     | 55    | 3       | 52      | E    | 1           | 243437.990   | -0.174                     | 489.5078  |
| 55   | 5      | 51     | 55    | 4       | 52      | E    | 1           | 243437.990   | -0.174                     | 489.5078  |
| 47   | 0      | 47     | 46    | 0       | 46      | A    | 1           | 243510.510   | 0.088                      | 384.6871  |
| 47   | 0      | 47     | 46    | 1       | 46      | A    | 1           | 243510.510   | 0.088                      | 384.6871  |
| 47   | 1      | 47     | 46    | 0       | 46      | A    | 1           | 243510.510   | 0.088                      | 384.6871  |
| 47   | 1      | 47     | 46    | 1       | 46      | A    | 1           | 243510.510   | 0.088                      | 384.6871  |
| 47   | 0      | 47     | 46    | 0       | 46      | E    | 1           | 243521.081   | -0.017                     | 384.3223  |
| 47   | 1      | 47     | 46    | 1       | 46      | E    | 1           | 243521.081   | -0.017                     | 384.3223  |
| 38   | 22     | 17     | 38    | 21      | 18      | E    | 0           | 243556.362   | 0.050                      | 303.7379  |
| 38   | 22     | 16     | 38    | 21      | 17      | A    | 0           | 243565.010   | -0.035                     | 303.7510  |
| 38   | 22     | 17     | 38    | 21      | 18      | A    | 0           | 243565.010   | -0.035                     | 303.7510  |
| 47   | 0      | 47     | 46    | 0       | 46      | A    | 0           | 243582.021   | -0.176                     | 256.0195  |
| 47   | 0      | 47     | 46    | 1       | 46      | A    | 0           | 243582.021   | -0.176                     | 256.0195  |
| 47   | 1      | 47     | 46    | 0       | 46      | A    | 0           | 243582.021   | -0.176                     | 256.0195  |
| 47   | 1      | 47     | 46    | 1       | 46      | A    | 0           | 243582.021   | -0.176                     | 256.0195  |
| 47   | 0      | 47     | 46    | 0       | 46      | E    | 0           | 243582.021   | 0.159                      | 256.0308  |
| 47   | 1      | 47     | 46    | 1       | 46      | E    | 0           | 243582.021   | 0.159                      | 256.0308  |
| 40   | 8      | 33     | 39    | 7       | 32      | E    | 1           | 243608.917   | -0.157                     | 370.1932  |
| 40   | 8      | 33     | 39    | 7       | 32      | E    | 0           | 243610.087   | 0.053                      | 241.8766  |
| 40   | 8      | 33     | 39    | 7       | 32      | A    | 0           | 243617.665   | -0.005                     | 241.8701  |
| 37   | 22     | 15     | 37    | 21      | 16      | E    | 0           | 243761.616   | 0.012                      | 295.8934  |
| 37   | 22     | 16     | 37    | 21      | 17      | E    | 0           | 243798.320   | 0.040                      | 295.8843  |
| 60   | 23     | 37     | 60    | 22      | 38      | E    | 0           | 243799.634   | -0.025                     | 538.5425  |
| 37   | 22     | 15     | 37    | 21      | 16      | A    | 0           | 243806.744   | -0.041                     | 295.8975  |
| 37   | 22     | 16     | 37    | 21      | 17      | A    | 0           | 243806.744   | -0.041                     | 295.8975  |
| 60   | 23     | 38     | 60    | 22      | 39      | E    | 0           | 243833.506   | -0.044                     | 538.5345  |
| 60   | 23     | 37     | 60    | 22      | 38      | A    | 0           | 243847.155   | 0.126                      | 538.5460  |
| 39   | 16     | 24     | 38    | 16      | 23      | A    | 0           | 243979.271   | 0.017                      | 269.1054  |
| 39   | 16     | 24     | 38    | 16      | 23      | E    | 0           | 243982.699   | -0.056                     | 269.0965  |
| 36   | 22     | 14     | 36    | 21      | 15      | E    | 0           | 243984.440   | -0.055                     | 288.2509  |
| 36   | 22     | 15     | 36    | 21      | 16      | E    | 0           | 244021.324   | 0.042                      | 288.2418  |
| 36   | 22     | 14     | 36    | 21      | 15      | A    | 0           | 244029.545   | -0.032                     | 288.2550  |
| 36   | 22     | 15     | 36    | 21      | 16      | A    | 0           | 244029.545   | -0.032                     | 288.2550  |
| 62   | 8      | 54     | 62    | 7       | 55      | E    | 0           | 244075.470   | -0.066                     | 471.3627  |
| 62   | 9      | 54     | 62    | 8       | 55      | E    | 0           | 244075.470   | -0.072                     | 471.3627  |
| 62   | 9      | 54     | 62    | 7       | 55      | A    | 0           | 244092.832   | -0.151                     | 471.3601  |
| 62   | 9      | 54     | 62    | 8       | 55      | A    | 0           | 244092.832   | -0.156                     | 471.3601  |
| 52   | 2      | 50     | 52    | 1       | 51      | E    | 0           | 244116.304   | 0.043                      | 315.7390  |
| 52   | 3      | 50     | 52    | 2       | 51      | E    | 0           | 244116.304   | 0.043                      | 315.7390  |
| 52   | 2      | 50     | 52    | 1       | 51      | A    | 0           | 244156.243   | 0.181                      | 315.7292  |
| 52   | 3      | 50     | 52    | 2       | 51      | A    | 0           | 244156.243   | 0.181                      | 315.7292  |
| 35   | 22     | 13     | 35    | 21      | 14      | E    | 0           | 244189.485   | -0.055                     | 280.8191  |
| 35   | 22     | 14     | 35    | 21      | 15      | E    | 0           | 244226.444   | 0.015                      | 280.8100  |
| 35   | 22     | 13     | 35    | 21      | 14      | A    | 0           | 244234.504   | -0.027                     | 280.8233  |
| 35   | 22     | 14     | 35    | 21      | 15      | A    | 0           | 244234.504   | -0.027                     | 280.8233  |
| 52   | 2      | 50     | 52    | 1       | 51      | E    | 1           | 244305.184   | -0.022                     | 444.0258  |
| 52   | 3      | 50     | 52    | 2       | 51      | E    | 1           | 244305.184   | -0.022                     | 444.0258  |
| 34   | 22     | 12     | 34    | 21      | 13      | E    | 0           | 244377.819   | 0.016                      | 273.5977  |
| 34   | 22     | 13     | 34    | 21      | 14      | E    | 0           | 244414.893   | 0.110                      | 273.5885  |
| 34   | 22     | 12     | 34    | 21      | 13      | A    | 0           | 244422.639   | -0.068                     | 273.6018  |
| 34   | 22     | 13     | 34    | 21      | 14      | A    | 0           | 244422.639   | -0.068                     | 273.6018  |
| 37   | 9      | 28     | 36    | 9       | 27      | A    | 0           | 244428.590   | -0.034                     | 224.1850  |
| 37   | 10     | 27     | 36    | 10      | 26      | A    | 0           | 244442.809   | -0.027                     | 226.3998  |
| 37   | 10     | 27     | 36    | 10      | 26      | E    | 0           | 244450.748   | -0.034                     | 226.4073  |
| 33   | 22     | 11     | 33    | 21      | 12      | E    | 0           | 244550.274   | -0.020                     | 266.5862  |
| 33   | 22     | 12     | 33    | 21      | 13      | E    | 0           | 244587.404   | 0.047                      | 266.5771  |
| 33   | 22     | 11     | 33    | 21      | 12      | A    | 0           | 244595.064   | -0.054                     | 266.5904  |
| 33   | 22     | 12     | 33    | 21      | 13      | A    | 0           | 244595.064   | -0.054                     | 266.5904  |
| 32   | 22     | 10     | 32    | 21      | 11      | E    | 0           | 244707.994   | 0.012                      | 259.7845  |
| 32   | 22     | 11     | 32    | 21      | 12      | E    | 0           | 244745.157   | 0.038                      | 259.7754  |
| 39   | 15     | 25     | 38    | 15      | 24      | A    | 0           | 244747.450   | 0.468                      | 263.4102  |
| 39   | 15     | 24     | 38    | 15      | 23      | A    | 0           | 244748.969   | -0.167                     | 263.4102  |
| 39   | 15     | 24     | 38    | 15      | 23      | E    | 0           | 244750.101   | 0.079                      | 263.4157  |
| 59   | 23     | 37     | 59    | 22      | 38      | E    | 0           | 244781.857   | -0.056                     | 525.9480  |
| 59   | 23     | 36     | 59    | 22      | 37      | A    | 0           | 244794.634   | 0.051                      | 525.9597  |
| 31   | 22     | 9      | 31    | 21      | 10      | E    | 0           | 244851.783   | -0.009                     | 253.1921  |
| 31   | 22     | 10     | 31    | 21      | 11      | E    | 0           | 244889.025   | 0.031                      | 253.1830  |
| 31   | 22     | 9      | 31    | 21      | 10      | A    | 0           | 244896.392   | -0.077                     | 253.1964  |
| 31   | 22     | 10     | 31    | 21      | 11      | A    | 0           | 244896.392   | -0.077                     | 253.1964  |
| 30   | 22     | 8      | 30    | 21      | 9       | E    | 0           | 244982.587   | -0.021                     | 246.8088  |
| 30   | 22     | 8      | 30    | 21      | 9       | A    | 0           | 245027.228   | 0.008                      | 246.8131  |
| 30   | 22     | 9      | 30    | 21      | 10      | A    | 0           | 245027.228   | 0.008                      | 246.8131  |
| 36   | 9      | 28     | 35    | 8       | 27      | A    | 0           | 245061.032   | 0.005                      | 214.0071  |
| 29   | 22     | 7      | 29    | 21      | 8       | E    | 0           | 245101.259   | -0.019                     | 240.6343  |
| 29   | 22     | 8      | 29    | 21      | 9       | E    | 0           | 245138.635   | 0.046                      | 240.6251  |
| 29   | 22     | 7      | 29    | 21      | 8       | A    | 0           | 245145.760   | -0.068                     | 240.6386  |
| 29   | 22     | 8      | 29    | 21      | 9       | A    | 0           | 245145.760   | -0.068                     | 240.6386  |
| 57   | 5      | 52     | 57    | 4       | 53      | A    | 0           | 245157.292   | 0.013                      | 390.1457  |
| 57   | 6      | 52     | 57    | 5       | 53      | A    | 0           | 245157.292   | 0.013                      | 390.1457  |
| 57   | 5      | 52     | 57    | 4       | 53      | E    | 1           | 245171.744   | -0.085                     | 518.4414  |
| 57   | 6      | 52     | 57    | 5       | 53      | E    | 1           | 245171.744   | -0.085                     | 518.4414  |
| 28   | 22     | 6      | 28    | 21      | 7       | E    | 0           | 245208.499   | -0.114                     | 234.6682  |
| 37   | 9      | 29     | 36    | 8       | 28      | E    | 0           | 245218.099   | -0.058                     | 221.7682  |
| 28   | 22     | 7      | 28    | 21      | 8       | E    | 0           | 245246.094   | 0.126                      | 234.6591  |
| 28   | 22     | 6      | 28    | 21      | 7       | A    | 0           | 245253.085   | -0.020                     | 234.6725  |
| 28   | 22     | 7      | 28    | 21      | 8       | A    | 0           | 245253.085   | -0.020                     | 234.6725  |
| 37   | 9      | 29     | 36    | 8       | 28      | A    | 0           | 245256.860   | 0.056                      | 221.7603  |
| 54   | 3      | 51     | 54    | 2       | 52      | A    | 1           | 245272.093   | -0.181                     | 471.5680  |
| 54   | 4      | 51     | 54    | 3       | 52      | A    | 1           | 245272.093   | -0.181                     | 471.5680  |
| 39   | 8      | 31     | 38    | 8       | 30      | E    | 0           | 245323.855   | -0.022                     | 237.7004  |
| 39   | 8      | 31     | 38    | 8       | 30      | A    | 0           | 245334.975   | 0.007                      | 237.6934  |
| 27   | 22     | 6      | 27    | 21      | 7       | E    | 0           | 245342.898   | 0.116                      | 228.9013  |
| 27   | 22     | 5      | 27    | 21      | 6       | A    | 0           | 245349.781   | -0.046                     | 228.9147  |
| 27   | 22     | 6      | 27    | 21      | 7       | A    | 0           | 245349.781   | -0.046                     | 228.9147  |
| 39   | 8      | 31     | 38    | 8       | 30      | E    | 1           | 245362.739   | 0.152                      | 366.0068  |
| 26   | 22     | 4      | 26    | 21      | 5       | E    | 0           | 245392.349   | 0.003                      | 223.3605  |
| 26   | 22     | 5      | 26    | 21      | 6       | E    | 0           | 245429.797   | 0.024                      | 223.3514  |
| 25   | 22     | 4      | 25    | 21      | 5       | E    | 0           | 245507.707   | 0.053                      | 218.0092  |
| 25   | 22     | 3      | 25    | 21      | 4       | A    | 0           | 245514.564   | 0.023                      | 218.0226  |
| 25   | 22     | 4      | 25    | 21      | 5       | A    | 0           | 245514.564   | 0.023                      | 218.0226  |
| 37   | 9      | 29     | 36    | 8       | 28      | E    | 1           | 245552.146   | 0.327                      | 350.0711  |
| 70   | 24     | 46     | 70    | 23      | 47      | E    | 0           | 245568.076   | -0.034                     | 684.4722  |
| 70   | 24     | 47     | 70    | 23      | 48      | E    | 0           | 245601.302   | -0.116                     | 684.4652  |
| 70   | 24     | 47     | 70    | 23      | 48      | A    | 0           | 245628.471   | -0.048                     | 684.4748  |
| 58   | 23     | 35     | 58    | 22      | 36      | E    | 0           | 245636.991   | -0.044                     | 513.5912  |
| 58   | 23     | 36     | 58    | 22      | 37      | A    | 0           | 245683.882   | -0.035                     | 513.5950  |
| 39   | 14     | 26     | 38    | 14      | 25      | A    | 0           | 245726.986   | 0.003                      | 258.1512  |
| 39   | 14     | 25     | 38    | 14      | 24      | E    | 0           | 245742.450   | -0.111                     | 258.1586  |
| 39   | 14     | 26     | 38    | 14      | 25      | E    | 0           | 245743.613   | 0.123                      | 258.1456  |
| 39   | 14     | 25     | 38    | 14      | 24      | A    | 0           | 245751.700   | -0.023                     | 258.1520  |
| 35   | 9      | 27     | 34    | 8       | 26      | E    | 0           | 245901.944   | -0.093                     | 206.4106  |
| 35   | 9      | 27     | 34    | 8       | 26      | A    | 0           | 245956.794   | 0.017                      | 206.4019  |
| 25   | 9      | 17     | 24    | 8       | 16      | E    | 0           | 246025.370   | -0.062                     | 141.8981  |
| 25   | 9      | 17     | 24    | 8       | 16      | A    | 0           | 246123.358   | 0.008                      | 141.8900  |



| $J'$ | $K'_a$ | $K'_c$ | $J''$ | $K''_a$ | $K''_c$ | Sym. | $v_{tCH_3}$ | $\nu_{Obs.}$ | $\nu_{Obs.} - \nu_{Calc.}$ | $E_{low}$ |
|------|--------|--------|-------|---------|---------|------|-------------|--------------|----------------------------|-----------|
| 40   | 8      | 32     | 39    | 9       | 31      | A    | 0           | 246260.208   | -0.004                     | 245.9967  |
| 40   | 8      | 32     | 39    | 9       | 31      | E    | 0           | 246262.972   | 0.013                      | 246.0030  |
| 54   | 3      | 51     | 54    | 2       | 52      | E    | 0           | 246307.087   | 0.007                      | 343.0133  |
| 54   | 4      | 51     | 54    | 3       | 52      | E    | 0           | 246307.087   | 0.007                      | 343.0133  |
| 54   | 3      | 51     | 54    | 2       | 52      | A    | 0           | 246343.321   | 0.122                      | 343.0050  |
| 54   | 4      | 51     | 54    | 3       | 52      | A    | 0           | 246343.321   | 0.122                      | 343.0050  |
| 54   | 3      | 51     | 54    | 2       | 52      | E    | 1           | 246446.828   | -0.200                     | 471.3022  |
| 54   | 4      | 51     | 54    | 3       | 52      | E    | 1           | 246446.828   | -0.200                     | 471.3022  |
| 57   | 23     | 35     | 57    | 22      | 36      | E    | 0           | 246507.343   | -0.052                     | 501.4391  |
| 57   | 23     | 34     | 57    | 22      | 35      | A    | 0           | 246518.487   | -0.023                     | 501.4511  |
| 38   | 9      | 30     | 37    | 8       | 29      | A    | 0           | 246583.105   | -0.005                     | 229.6557  |
| 15   | 14     | 1      | 14    | 13      | 2       | A    | 0           | 246594.641   | 0.005                      | 121.0225  |
| 15   | 14     | 2      | 14    | 13      | 1       | A    | 0           | 246594.641   | 0.005                      | 121.0225  |
| 59   | 6      | 53     | 59    | 5       | 54      | E    | 1           | 246692.799   | -0.006                     | 548.4481  |
| 59   | 7      | 53     | 59    | 6       | 54      | E    | 1           | 246692.799   | -0.006                     | 548.4481  |
| 59   | 6      | 53     | 59    | 5       | 54      | A    | 0           | 246721.892   | -0.032                     | 420.1567  |
| 59   | 7      | 53     | 59    | 6       | 54      | A    | 0           | 246721.892   | -0.032                     | 420.1567  |
| 40   | 27     | 14     | 39    | 27      | 13      | A    | 0           | 246874.347   | -0.006                     | 366.3654  |
| 40   | 27     | 13     | 39    | 27      | 12      | A    | 0           | 246874.347   | -0.006                     | 366.3654  |
| 38   | 11     | 27     | 37    | 11      | 26      | A    | 0           | 246932.800   | -0.034                     | 237.3245  |
| 38   | 11     | 27     | 37    | 11      | 26      | E    | 0           | 246942.986   | -0.005                     | 237.3303  |
| 39   | 13     | 27     | 38    | 13      | 26      | A    | 0           | 246971.087   | -0.007                     | 253.3488  |
| 39   | 13     | 27     | 38    | 13      | 26      | E    | 0           | 247010.946   | -0.044                     | 253.3476  |
| 69   | 24     | 45     | 69    | 23      | 46      | E    | 0           | 247067.957   | 0.027                      | 669.6769  |
| 69   | 24     | 46     | 69    | 23      | 47      | E    | 0           | 247101.010   | -0.107                     | 669.6700  |
| 69   | 24     | 45     | 69    | 23      | 46      | A    | 0           | 247110.852   | 0.109                      | 669.6805  |
| 69   | 24     | 46     | 69    | 23      | 47      | A    | 0           | 247122.321   | -0.065                     | 669.6800  |
| 39   | 13     | 26     | 38    | 13      | 25      | E    | 0           | 247165.678   | -0.064                     | 253.3629  |
| 56   | 23     | 33     | 56    | 22      | 34      | E    | 0           | 247255.694   | -0.040                     | 489.5233  |
| 56   | 23     | 34     | 56    | 22      | 35      | E    | 0           | 247291.537   | -0.029                     | 489.5152  |
| 56   | 23     | 33     | 56    | 22      | 34      | A    | 0           | 247301.964   | 0.005                      | 489.5273  |
| 39   | 10     | 30     | 38    | 10      | 29      | E    | 0           | 247304.464   | 0.000                      | 241.5348  |
| 39   | 10     | 30     | 38    | 10      | 29      | A    | 0           | 247307.323   | 0.569                      | 241.5288  |
| 56   | 4      | 52     | 56    | 3       | 53      | A    | 1           | 247346.480   | 0.304                      | 499.8846  |
| 56   | 5      | 52     | 56    | 4       | 53      | A    | 1           | 247346.480   | 0.304                      | 499.8846  |
| 40   | 24     | 16     | 39    | 24      | 15      | A    | 0           | 247386.879   | -0.079                     | 337.3389  |
| 40   | 24     | 17     | 39    | 24      | 16      | A    | 0           | 247386.879   | -0.079                     | 337.3389  |
| 17   | 13     | 5      | 16    | 12      | 5       | E    | 0           | 247402.799   | 0.032                      | 122.6286  |
| 17   | 13     | 4      | 16    | 12      | 4       | E    | 0           | 247408.995   | -0.064                     | 122.6421  |
| 17   | 13     | 5      | 16    | 12      | 4       | A    | 0           | 247446.724   | 0.002                      | 122.6331  |
| 17   | 13     | 4      | 16    | 12      | 5       | A    | 0           | 247446.724   | 0.002                      | 122.6331  |
| 40   | 23     | 18     | 39    | 23      | 17      | A    | 0           | 247603.037   | -0.094                     | 328.4400  |
| 40   | 23     | 17     | 39    | 23      | 16      | E    | 0           | 247603.037   | -0.094                     | 328.4400  |
| 40   | 23     | 17     | 39    | 23      | 16      | E    | 0           | 247604.252   | -0.117                     | 328.4331  |
| 34   | 9      | 26     | 33    | 8       | 25      | E    | 0           | 247671.308   | -0.055                     | 198.9658  |
| 34   | 9      | 26     | 33    | 8       | 25      | A    | 0           | 247732.175   | -0.012                     | 198.9569  |
| 43   | 5      | 38     | 42    | 5       | 37      | A    | 1           | 247777.580   | -0.096                     | 384.8810  |
| 43   | 5      | 38     | 42    | 6       | 37      | A    | 1           | 247777.580   | 0.256                      | 384.8810  |
| 43   | 6      | 38     | 42    | 5       | 37      | A    | 1           | 247777.580   | -0.278                     | 384.8810  |
| 43   | 6      | 38     | 42    | 6       | 37      | A    | 1           | 247777.580   | 0.074                      | 384.8810  |
| 42   | 6      | 36     | 41    | 7       | 35      | A    | 1           | 247798.322   | 0.042                      | 381.9585  |
| 42   | 7      | 36     | 41    | 7       | 35      | A    | 1           | 247804.276   | 0.023                      | 381.9585  |
| 42   | 6      | 36     | 41    | 6       | 35      | A    | 1           | 247809.392   | 0.081                      | 381.9582  |
| 42   | 7      | 36     | 41    | 6       | 35      | A    | 1           | 247815.304   | 0.021                      | 381.9582  |
| 40   | 22     | 18     | 39    | 22      | 17      | A    | 0           | 247849.563   | -0.018                     | 319.9317  |
| 40   | 22     | 19     | 39    | 22      | 18      | A    | 0           | 247849.563   | -0.018                     | 319.9317  |
| 40   | 22     | 18     | 39    | 22      | 17      | E    | 0           | 247850.882   | -0.054                     | 319.9262  |
| 44   | 4      | 40     | 43    | 4       | 39      | A    | 1           | 247866.530   | -0.043                     | 387.3281  |
| 44   | 4      | 40     | 43    | 5       | 39      | A    | 1           | 247866.530   | -0.035                     | 387.3281  |
| 44   | 5      | 40     | 43    | 4       | 39      | A    | 1           | 247866.530   | -0.047                     | 387.3281  |
| 44   | 5      | 40     | 43    | 5       | 39      | A    | 1           | 247866.530   | -0.039                     | 387.3281  |
| 41   | 7      | 34     | 40    | 8       | 33      | A    | 1           | 247885.934   | 0.040                      | 378.5180  |
| 43   | 5      | 38     | 42    | 5       | 37      | E    | 0           | 247950.535   | -0.103                     | 256.3482  |
| 43   | 6      | 38     | 42    | 6       | 37      | E    | 0           | 247950.535   | 0.085                      | 256.3482  |
| 43   | 5      | 38     | 42    | 5       | 37      | A    | 0           | 247954.585   | -0.179                     | 256.3415  |
| 43   | 5      | 38     | 42    | 6       | 37      | A    | 0           | 247954.585   | 0.214                      | 256.3415  |
| 43   | 6      | 38     | 42    | 5       | 37      | A    | 0           | 247954.585   | -0.382                     | 256.3415  |
| 43   | 6      | 38     | 42    | 6       | 37      | A    | 0           | 247954.585   | 0.010                      | 256.3415  |
| 42   | 7      | 36     | 41    | 7       | 35      | E    | 1           | 247963.019   | 0.001                      | 381.7550  |
| 42   | 6      | 36     | 41    | 6       | 35      | E    | 1           | 247968.856   | -0.001                     | 381.7546  |
| 42   | 7      | 36     | 41    | 6       | 35      | E    | 1           | 247975.873   | 0.025                      | 381.7546  |
| 44   | 4      | 40     | 43    | 4       | 39      | E    | 1           | 247977.779   | -0.056                     | 387.0958  |
| 44   | 4      | 40     | 43    | 5       | 39      | E    | 1           | 247977.779   | -0.047                     | 387.0958  |
| 44   | 5      | 40     | 43    | 4       | 39      | E    | 1           | 247977.779   | -0.061                     | 387.0958  |
| 44   | 5      | 40     | 43    | 5       | 39      | E    | 1           | 247977.779   | -0.052                     | 387.0958  |
| 42   | 6      | 36     | 41    | 7       | 35      | E    | 0           | 247989.796   | -0.019                     | 253.4367  |
| 61   | 7      | 54     | 61    | 6       | 55      | E    | 1           | 247991.125   | 0.342                      | 579.5218  |
| 61   | 8      | 54     | 61    | 7       | 55      | E    | 1           | 247991.125   | 0.341                      | 579.5218  |
| 42   | 6      | 36     | 41    | 7       | 35      | A    | 0           | 247994.661   | -0.015                     | 253.4303  |
| 42   | 7      | 36     | 41    | 7       | 35      | E    | 0           | 247996.291   | -0.074                     | 253.4367  |
| 42   | 6      | 36     | 41    | 6       | 35      | A    | 0           | 248006.791   | -0.002                     | 253.4299  |
| 42   | 7      | 36     | 41    | 6       | 35      | E    | 0           | 248008.373   | -0.046                     | 253.4363  |
| 42   | 7      | 36     | 41    | 6       | 35      | A    | 0           | 248013.377   | -0.002                     | 253.4299  |
| 45   | 3      | 42     | 44    | 3       | 41      | A    | 1           | 248019.494   | -0.041                     | 389.3278  |
| 45   | 3      | 42     | 44    | 4       | 41      | A    | 1           | 248019.494   | -0.041                     | 389.3278  |
| 45   | 4      | 42     | 44    | 3       | 41      | A    | 1           | 248019.494   | -0.041                     | 389.3278  |
| 45   | 4      | 42     | 44    | 4       | 41      | A    | 1           | 248019.494   | -0.041                     | 389.3278  |
| 44   | 4      | 40     | 43    | 4       | 39      | E    | 0           | 248021.406   | -0.009                     | 258.7800  |
| 44   | 5      | 40     | 43    | 5       | 39      | E    | 0           | 248021.406   | -0.004                     | 258.7800  |
| 44   | 4      | 40     | 43    | 5       | 39      | A    | 0           | 248024.851   | 0.021                      | 258.7728  |
| 44   | 5      | 40     | 43    | 4       | 39      | A    | 0           | 248024.851   | 0.007                      | 258.7728  |
| 55   | 23     | 32     | 55    | 22      | 33      | A    | 0           | 248037.259   | -0.020                     | 477.8230  |
| 41   | 7      | 34     | 40    | 8       | 33      | E    | 1           | 248052.832   | 0.027                      | 378.3192  |
| 61   | 7      | 54     | 61    | 6       | 55      | A    | 0           | 248062.964   | -0.052                     | 451.2367  |
| 61   | 8      | 54     | 61    | 7       | 55      | A    | 0           | 248062.964   | -0.053                     | 451.2367  |
| 41   | 7      | 34     | 40    | 8       | 33      | E    | 0           | 248087.191   | -0.017                     | 250.0026  |
| 41   | 7      | 34     | 40    | 8       | 33      | A    | 0           | 248092.276   | 0.021                      | 249.9964  |
| 45   | 3      | 42     | 44    | 3       | 41      | E    | 1           | 248108.466   | -0.024                     | 389.0722  |
| 45   | 3      | 42     | 44    | 4       | 41      | E    | 1           | 248108.466   | -0.023                     | 389.0722  |
| 45   | 4      | 42     | 44    | 3       | 41      | E    | 1           | 248108.466   | -0.024                     | 389.0722  |
| 45   | 4      | 42     | 44    | 4       | 41      | E    | 1           | 248108.466   | -0.024                     | 389.0722  |
| 41   | 7      | 34     | 40    | 7       | 33      | A    | 1           | 248125.146   | 0.118                      | 378.5101  |
| 40   | 21     | 20     | 39    | 21      | 19      | A    | 0           | 248132.735   | -0.040                     | 311.8160  |
| 40   | 21     | 19     | 39    | 21      | 18      | A    | 0           | 248132.735   | -0.040                     | 311.8160  |
| 40   | 21     | 20     | 39    | 21      | 19      | E    | 0           | 248134.162   | -0.033                     | 311.8029  |
| 45   | 3      | 42     | 44    | 3       | 41      | E    | 0           | 248156.100   | -0.009                     | 260.7603  |
| 45   | 4      | 42     | 44    | 4       | 41      | E    | 0           | 248156.100   | -0.009                     | 260.7603  |
| 45   | 3      | 42     | 44    | 3       | 41      | A    | 0           | 248158.841   | -0.003                     | 260.7523  |
| 45   | 3      | 42     | 44    | 4       | 41      | A    | 0           | 248158.841   | -0.003                     | 260.7523  |
| 45   | 4      | 42     | 44    | 3       | 41      | A    | 0           | 248158.841   | -0.003                     | 260.7523  |
| 45   | 4      | 42     | 44    | 4       | 41      | A    | 0           | 248158.841   | -0.003                     | 260.7523  |
| 19   | 12     | 8      | 18    | 11      | 8       | E    | 0           | 248188.176   | 0.003                      | 125.4757  |
| 19   | 12     | 7      | 18    | 11      | 7       | E    | 0           | 248200.061   | -0.062                     | 125.4888  |
| 46   | 2      | 44     | 45    | 2       | 43      | A    | 1           | 248208.290   | -0.039                     | 390.8994  |
| 46   | 2      | 44     | 45    | 3       | 43      | A    | 1           | 248208.290   | -0.039                     | 390.8994  |
| 46   | 3      | 44     | 45    | 2       | 43      | A    | 1           | 248208.290   | -0.039                     | 390.8994  |



| $J'$ | $K'_a$ | $K'_c$ | $J''$ | $K''_a$ | $K''_c$ | Sym. | $v_{tCH_3}$ | $\nu_{Obs.}$ | $\nu_{Obs.} - \nu_{Calc.}$ | $E_{low}$ |
|------|--------|--------|-------|---------|---------|------|-------------|--------------|----------------------------|-----------|
| 46   | 3      | 44     | 45    | 3       | 43      | A    | 1           | 248208.290   | -0.039                     | 390.8994  |
| 41   | 8      | 34     | 40    | 8       | 33      | E    | 1           | 248209.621   | -0.002                     | 378.3192  |
| 19   | 12     | 7      | 18    | 11      | 8       | A    | 0           | 248234.133   | 0.048                      | 125.4786  |
| 19   | 12     | 8      | 18    | 11      | 7       | A    | 0           | 248234.133   | 0.050                      | 125.4786  |
| 41   | 8      | 34     | 40    | 8       | 33      | E    | 0           | 248235.602   | 0.082                      | 250.0026  |
| 41   | 8      | 34     | 40    | 8       | 33      | A    | 0           | 248241.246   | -0.006                     | 249.9964  |
| 41   | 8      | 34     | 40    | 7       | 33      | A    | 1           | 248262.259   | 0.069                      | 378.5101  |
| 46   | 2      | 44     | 45    | 2       | 43      | E    | 1           | 248273.755   | -0.036                     | 390.6142  |
| 46   | 2      | 44     | 45    | 3       | 43      | E    | 1           | 248273.755   | -0.036                     | 390.6142  |
| 46   | 3      | 44     | 45    | 2       | 43      | E    | 1           | 248273.755   | -0.036                     | 390.6142  |
| 46   | 3      | 44     | 45    | 3       | 43      | E    | 1           | 248273.755   | -0.036                     | 390.6142  |
| 39   | 12     | 28     | 38    | 12      | 27      | A    | 0           | 248315.799   | -0.088                     | 249.0220  |
| 46   | 2      | 44     | 45    | 2       | 43      | E    | 0           | 248325.596   | 0.008                      | 262.3080  |
| 46   | 3      | 44     | 45    | 3       | 43      | E    | 0           | 248325.596   | 0.008                      | 262.3080  |
| 46   | 2      | 44     | 45    | 2       | 43      | A    | 0           | 248327.589   | -0.009                     | 262.2991  |
| 46   | 2      | 44     | 45    | 3       | 43      | A    | 0           | 248327.589   | -0.009                     | 262.2991  |
| 46   | 3      | 44     | 45    | 2       | 43      | A    | 0           | 248327.589   | -0.009                     | 262.2991  |
| 46   | 3      | 44     | 45    | 3       | 43      | A    | 0           | 248327.589   | -0.009                     | 262.2991  |
| 56   | 4      | 52     | 56    | 3       | 53      | A    | 0           | 248338.638   | 0.044                      | 371.3675  |
| 56   | 5      | 52     | 56    | 4       | 53      | A    | 0           | 248338.638   | 0.044                      | 371.3675  |
| 41   | 7      | 34     | 40    | 7       | 33      | E    | 0           | 248344.908   | -0.029                     | 249.9940  |
| 41   | 7      | 34     | 40    | 7       | 33      | A    | 0           | 248351.120   | -0.003                     | 249.9877  |
| 56   | 4      | 52     | 56    | 3       | 53      | E    | 1           | 248396.963   | -0.253                     | 499.6637  |
| 56   | 5      | 52     | 56    | 4       | 53      | E    | 1           | 248396.963   | -0.253                     | 499.6637  |
| 47   | 1      | 46     | 46    | 1       | 45      | A    | 1           | 248417.203   | 0.006                      | 392.0566  |
| 47   | 1      | 46     | 46    | 2       | 45      | A    | 1           | 248417.203   | 0.006                      | 392.0566  |
| 47   | 2      | 46     | 46    | 1       | 45      | A    | 1           | 248417.203   | 0.006                      | 392.0566  |
| 47   | 2      | 46     | 46    | 2       | 45      | A    | 1           | 248417.203   | 0.006                      | 392.0566  |
| 47   | 1      | 46     | 46    | 1       | 45      | E    | 1           | 248456.858   | -0.015                     | 391.7353  |
| 47   | 1      | 46     | 46    | 2       | 45      | E    | 1           | 248456.858   | -0.015                     | 391.7353  |
| 47   | 2      | 46     | 46    | 1       | 45      | E    | 1           | 248456.858   | -0.015                     | 391.7353  |
| 47   | 2      | 46     | 46    | 2       | 45      | E    | 1           | 248456.858   | -0.015                     | 391.7353  |
| 40   | 20     | 20     | 39    | 20      | 19      | A    | 0           | 248461.120   | 0.013                      | 304.0953  |
| 40   | 20     | 21     | 39    | 20      | 20      | A    | 0           | 248461.120   | 0.013                      | 304.0953  |
| 40   | 20     | 21     | 39    | 20      | 20      | E    | 0           | 248462.784   | -0.052                     | 304.0826  |
| 68   | 24     | 44     | 68    | 23      | 45      | E    | 0           | 248472.909   | -0.025                     | 655.1101  |
| 40   | 9      | 32     | 39    | 9       | 31      | E    | 1           | 248479.182   | -0.187                     | 374.3157  |
| 41   | 8      | 34     | 40    | 7       | 33      | E    | 1           | 248481.323   | 0.003                      | 378.3101  |
| 41   | 8      | 34     | 40    | 7       | 33      | E    | 0           | 248493.231   | -0.019                     | 249.9940  |
| 41   | 8      | 34     | 40    | 7       | 33      | A    | 0           | 248500.098   | -0.022                     | 249.9877  |
| 40   | 9      | 32     | 39    | 9       | 31      | E    | 0           | 248502.518   | 0.055                      | 246.0030  |
| 68   | 24     | 45     | 68    | 23      | 46      | E    | 0           | 248506.589   | -0.026                     | 655.1031  |
| 40   | 9      | 32     | 39    | 9       | 31      | A    | 0           | 248508.151   | -0.021                     | 245.9967  |
| 47   | 1      | 46     | 46    | 1       | 45      | E    | 0           | 248513.351   | -0.036                     | 263.4365  |
| 47   | 2      | 46     | 46    | 2       | 45      | E    | 0           | 248513.351   | -0.036                     | 263.4365  |
| 47   | 1      | 46     | 46    | 1       | 45      | A    | 0           | 248514.636   | 0.029                      | 263.4265  |
| 47   | 1      | 46     | 46    | 2       | 45      | A    | 0           | 248514.636   | 0.029                      | 263.4265  |
| 47   | 2      | 46     | 46    | 2       | 45      | A    | 0           | 248514.636   | 0.029                      | 263.4265  |
| 48   | 0      | 48     | 47    | 0       | 47      | A    | 1           | 248637.088   | 0.095                      | 392.8098  |
| 48   | 0      | 48     | 47    | 1       | 47      | A    | 1           | 248637.088   | 0.095                      | 392.8098  |
| 48   | 1      | 48     | 47    | 0       | 47      | A    | 1           | 248637.088   | 0.095                      | 392.8098  |
| 48   | 1      | 48     | 47    | 1       | 47      | A    | 1           | 248637.088   | 0.095                      | 392.8098  |
| 48   | 0      | 48     | 47    | 0       | 47      | E    | 1           | 248647.642   | 0.065                      | 392.4452  |
| 48   | 1      | 48     | 47    | 1       | 47      | E    | 1           | 248647.642   | 0.065                      | 392.4452  |
| 54   | 23     | 31     | 54    | 22      | 32      | E    | 0           | 248681.619   | -0.011                     | 466.3331  |
| 48   | 0      | 48     | 47    | 0       | 47      | A    | 0           | 248709.860   | -0.172                     | 264.1445  |
| 48   | 0      | 48     | 47    | 1       | 47      | A    | 0           | 248709.860   | -0.172                     | 264.1445  |
| 48   | 1      | 48     | 47    | 0       | 47      | A    | 0           | 248709.860   | -0.172                     | 264.1445  |
| 48   | 1      | 48     | 47    | 1       | 47      | A    | 0           | 248709.860   | -0.172                     | 264.1445  |
| 48   | 0      | 48     | 47    | 0       | 47      | E    | 0           | 248709.860   | 0.161                      | 264.1558  |
| 48   | 1      | 48     | 47    | 1       | 47      | E    | 0           | 248709.860   | 0.161                      | 264.1558  |
| 54   | 23     | 32     | 54    | 22      | 33      | E    | 0           | 248718.174   | -0.070                     | 466.3251  |
| 54   | 23     | 31     | 54    | 22      | 32      | A    | 0           | 248727.282   | -0.030                     | 466.3374  |
| 21   | 11     | 11     | 20    | 10      | 11      | E    | 0           | 248788.971   | 0.025                      | 129.5845  |
| 21   | 11     | 10     | 20    | 10      | 10      | E    | 0           | 248806.698   | -0.099                     | 129.5969  |
| 21   | 11     | 11     | 20    | 10      | 10      | A    | 0           | 248836.479   | 0.249                      | 129.5857  |
| 21   | 11     | 10     | 20    | 10      | 11      | A    | 0           | 248836.479   | -0.238                     | 129.5857  |
| 40   | 19     | 22     | 39    | 19      | 21      | A    | 0           | 248845.672   | -0.022                     | 296.7727  |
| 40   | 19     | 21     | 39    | 19      | 20      | A    | 0           | 248845.672   | -0.022                     | 296.7727  |
| 40   | 19     | 21     | 39    | 19      | 20      | E    | 0           | 248847.578   | 0.180                      | 296.7719  |
| 39   | 11     | 29     | 38    | 11      | 28      | A    | 0           | 248888.068   | 0.029                      | 245.1400  |
| 39   | 11     | 29     | 38    | 11      | 28      | E    | 0           | 248890.498   | 0.008                      | 245.1450  |
| 23   | 10     | 14     | 22    | 9       | 14      | E    | 0           | 248898.411   | 0.040                      | 135.0057  |
| 39   | 9      | 31     | 38    | 8       | 30      | E    | 0           | 248905.633   | -0.004                     | 237.7004  |
| 23   | 10     | 14     | 22    | 9       | 13      | A    | 0           | 248914.588   | -0.017                     | 135.0060  |
| 23   | 10     | 13     | 22    | 9       | 13      | E    | 0           | 248918.778   | -0.055                     | 135.0172  |
| 39   | 9      | 31     | 38    | 8       | 30      | A    | 0           | 248929.424   | -0.017                     | 237.6934  |
| 23   | 10     | 13     | 22    | 9       | 14      | A    | 0           | 248976.668   | 0.072                      | 135.0042  |
| 25   | 9      | 16     | 24    | 8       | 17      | A    | 0           | 249009.915   | 0.008                      | 141.8103  |
| 25   | 9      | 16     | 24    | 8       | 17      | E    | 0           | 249035.959   | 0.095                      | 141.8177  |
| 63   | 8      | 55     | 63    | 7       | 56      | E    | 1           | 249053.918   | 0.221                      | 611.6566  |
| 63   | 9      | 55     | 63    | 8       | 56      | E    | 1           | 249053.918   | 0.218                      | 611.6566  |
| 41   | 9      | 32     | 40    | 10      | 31      | E    | 1           | 249098.656   | -0.203                     | 386.5284  |
| 63   | 8      | 55     | 63    | 7       | 56      | E    | 0           | 249150.517   | -0.104                     | 483.3820  |
| 63   | 9      | 55     | 63    | 8       | 56      | E    | 0           | 249150.517   | -0.106                     | 483.3820  |
| 63   | 8      | 55     | 63    | 7       | 56      | A    | 0           | 249168.295   | -0.089                     | 483.3796  |
| 63   | 9      | 55     | 63    | 8       | 56      | A    | 0           | 249168.295   | -0.092                     | 483.3796  |
| 53   | 2      | 51     | 53    | 1       | 52      | E    | 1           | 249242.623   | -0.167                     | 453.3393  |
| 53   | 3      | 51     | 53    | 2       | 52      | E    | 1           | 249242.623   | -0.167                     | 453.3393  |
| 40   | 18     | 22     | 39    | 18      | 21      | A    | 0           | 249301.631   | -0.012                     | 289.8525  |
| 40   | 18     | 23     | 39    | 18      | 22      | A    | 0           | 249301.631   | -0.010                     | 289.8525  |
| 40   | 18     | 22     | 39    | 18      | 21      | E    | 0           | 249303.164   | -0.294                     | 289.8533  |
| 40   | 18     | 23     | 39    | 18      | 22      | E    | 0           | 249304.337   | 0.161                      | 289.8414  |
| 53   | 23     | 30     | 53    | 22      | 31      | E    | 0           | 249329.230   | -0.023                     | 455.0656  |
| 53   | 23     | 31     | 53    | 22      | 32      | E    | 0           | 249366.205   | -0.012                     | 455.0575  |
| 53   | 23     | 30     | 53    | 22      | 31      | A    | 0           | 249374.680   | -0.001                     | 455.0700  |
| 41   | 9      | 32     | 40    | 10      | 31      | A    | 0           | 249433.426   | -0.060                     | 258.2163  |
| 41   | 9      | 32     | 40    | 10      | 31      | E    | 0           | 249458.047   | 0.024                      | 258.2221  |
| 38   | 9      | 29     | 37    | 9       | 28      | E    | 0           | 249604.294   | -0.033                     | 232.3465  |
| 38   | 9      | 29     | 37    | 9       | 28      | A    | 0           | 249613.927   | -0.008                     | 232.3383  |
| 67   | 24     | 43     | 67    | 23      | 44      | E    | 0           | 249790.694   | -0.049                     | 640.7705  |
| 67   | 24     | 44     | 67    | 23      | 45      | E    | 0           | 249825.048   | -0.015                     | 640.7635  |
| 39   | 12     | 27     | 38    | 12      | 26      | A    | 0           | 249837.184   | 0.028                      | 249.0942  |
| 39   | 12     | 27     | 38    | 12      | 26      | E    | 0           | 249839.193   | 0.026                      | 249.0986  |
| 40   | 8      | 32     | 39    | 8       | 31      | E    | 0           | 249844.719   | 0.001                      | 245.8835  |
| 40   | 17     | 24     | 39    | 17      | 23      | A    | 0           | 249850.121   | -0.008                     | 283.3402  |
| 40   | 17     | 23     | 39    | 17      | 22      | E    | 0           | 249851.970   | -0.093                     | 283.3427  |
| 40   | 17     | 24     | 39    | 17      | 23      | E    | 0           | 249853.256   | 0.050                      | 283.3302  |
| 40   | 8      | 32     | 39    | 8       | 31      | A    | 0           | 249854.664   | -0.020                     | 245.8768  |
| 65   | 9      | 56     | 65    | 8       | 57      | E    | 1           | 249867.696   | 0.341                      | 644.8463  |
| 65   | 10     | 56     | 65    | 9       | 57      | E    | 1           | 249867.696   | 0.327                      | 644.8463  |
| 40   | 8      | 32     | 39    | 8       | 31      | E    | 1           | 249868.947   | 0.029                      | 374.1912  |
| 52   | 23     | 29     | 52    | 22      | 30      | E    | 0           | 249936.572   | -0.059                     | 444.0155  |
| 33   | 9      | 25     | 32    | 8       | 24      | E    | 0           | 249974.089   | -0.251                     | 191.6983  |
| 52   | 23     | 30     | 52    | 22      | 31      | A    | 0           | 249981.806   | -0.013                     | 444.0201  |



| $J'$ | $K'_a$ | $K'_c$ | $J''$ | $K''_a$ | $K''_c$ | Sym. | $v_{tCH_3}$ | $\nu_{Obs.}$ | $\nu_{Obs.} - \nu_{Calc.}$ | $E_{low}$ |
|------|--------|--------|-------|---------|---------|------|-------------|--------------|----------------------------|-----------|
| 52   | 23     | 29     | 52    | 22      | 30      | A    | 0           | 249981.806   | -0.013                     | 444.0201  |
| 65   | 9      | 56     | 65    | 8       | 57      | E    | 0           | 250009.294   | -0.078                     | 516.5808  |
| 65   | 10     | 56     | 65    | 9       | 57      | E    | 0           | 250009.294   | -0.091                     | 516.5808  |
| 65   | 9      | 56     | 65    | 8       | 57      | A    | 0           | 250023.676   | -0.105                     | 516.5792  |
| 65   | 10     | 56     | 65    | 9       | 57      | A    | 0           | 250023.676   | -0.118                     | 516.5792  |
| 33   | 9      | 25     | 32    | 8       | 24      | A    | 0           | 250039.083   | 0.013                      | 191.6892  |
| 58   | 5      | 53     | 58    | 4       | 54      | E    | 0           | 250106.054   | 0.000                      | 400.8166  |
| 58   | 6      | 53     | 58    | 5       | 54      | E    | 0           | 250106.054   | 0.000                      | 400.8166  |
| 26   | 9      | 18     | 25    | 8       | 17      | E    | 0           | 250125.592   | -0.030                     | 147.2363  |
| 58   | 5      | 53     | 58    | 4       | 54      | A    | 0           | 250134.823   | 0.013                      | 400.8110  |
| 58   | 6      | 53     | 58    | 5       | 54      | A    | 0           | 250134.823   | 0.013                      | 400.8110  |
| 58   | 5      | 53     | 58    | 4       | 54      | E    | 1           | 250148.544   | -0.025                     | 529.1044  |
| 58   | 6      | 53     | 58    | 5       | 54      | E    | 1           | 250148.544   | -0.025                     | 529.1044  |
| 26   | 9      | 18     | 25    | 8       | 17      | A    | 0           | 250199.403   | -0.004                     | 147.2281  |
| 67   | 10     | 57     | 67    | 9       | 58      | E    | 1           | 250415.603   | 0.654                      | 679.0847  |
| 67   | 11     | 57     | 67    | 10      | 58      | E    | 1           | 250415.603   | 0.593                      | 679.0847  |
| 51   | 23     | 28     | 51    | 22      | 29      | E    | 0           | 250505.985   | -0.041                     | 433.1825  |
| 40   | 16     | 25     | 39    | 16      | 24      | A    | 0           | 250522.172   | 0.149                      | 277.2437  |
| 40   | 16     | 24     | 39    | 16      | 23      | E    | 0           | 250524.191   | -0.023                     | 277.2477  |
| 40   | 16     | 25     | 39    | 16      | 24      | E    | 0           | 250525.894   | -0.037                     | 277.2349  |
| 51   | 23     | 29     | 51    | 22      | 30      | A    | 0           | 250550.974   | -0.010                     | 433.1871  |
| 51   | 23     | 28     | 51    | 22      | 29      | A    | 0           | 250550.974   | -0.010                     | 433.1871  |
| 67   | 10     | 57     | 67    | 9       | 58      | E    | 0           | 250601.217   | -0.038                     | 550.8303  |
| 67   | 11     | 57     | 67    | 10      | 58      | E    | 0           | 250601.217   | -0.093                     | 550.8303  |
| 67   | 10     | 57     | 67    | 9       | 58      | A    | 0           | 250612.298   | -0.106                     | 550.8295  |
| 67   | 11     | 57     | 67    | 10      | 58      | A    | 0           | 250612.298   | -0.162                     | 550.8295  |
| 66   | 24     | 42     | 66    | 23      | 43      | E    | 0           | 251027.935   | -0.006                     | 626.6570  |
| 50   | 23     | 27     | 50    | 22      | 28      | E    | 0           | 251039.544   | -0.000                     | 422.5658  |
| 66   | 24     | 43     | 66    | 23      | 44      | E    | 0           | 251062.758   | -0.152                     | 626.6501  |
| 66   | 24     | 42     | 66    | 23      | 43      | A    | 0           | 251074.080   | 0.095                      | 626.6611  |
| 66   | 24     | 43     | 66    | 23      | 44      | A    | 0           | 251075.645   | -0.049                     | 626.6610  |
| 50   | 23     | 28     | 50    | 22      | 29      | E    | 0           | 251077.388   | -0.029                     | 422.5578  |
| 50   | 23     | 28     | 50    | 22      | 29      | A    | 0           | 251084.259   | -0.027                     | 422.5706  |
| 50   | 23     | 27     | 50    | 22      | 28      | A    | 0           | 251084.259   | -0.027                     | 422.5706  |
| 55   | 3      | 52     | 55    | 2       | 53      | A    | 0           | 251287.767   | 0.204                      | 352.8273  |
| 55   | 4      | 52     | 55    | 3       | 53      | A    | 0           | 251287.767   | 0.204                      | 352.8273  |
| 40   | 15     | 26     | 39    | 15      | 25      | A    | 0           | 251363.763   | 0.031                      | 271.5740  |
| 40   | 15     | 25     | 39    | 15      | 24      | A    | 0           | 251368.095   | -0.071                     | 271.5742  |
| 40   | 15     | 25     | 39    | 15      | 24      | E    | 0           | 251368.095   | -0.001                     | 271.5797  |
| 40   | 15     | 26     | 39    | 15      | 25      | E    | 0           | 251370.509   | -0.027                     | 271.5668  |
| 55   | 3      | 52     | 55    | 2       | 53      | E    | 1           | 251392.016   | -0.195                     | 481.1223  |
| 55   | 4      | 52     | 55    | 3       | 53      | E    | 1           | 251392.016   | -0.195                     | 481.1223  |
| 49   | 23     | 26     | 49    | 22      | 27      | E    | 0           | 251539.118   | -0.038                     | 412.1651  |
| 49   | 23     | 27     | 49    | 22      | 28      | E    | 0           | 251577.267   | -0.022                     | 412.1571  |
| 49   | 23     | 27     | 49    | 22      | 28      | A    | 0           | 251583.659   | -0.033                     | 412.1699  |
| 49   | 23     | 26     | 49    | 22      | 27      | A    | 0           | 251583.659   | -0.033                     | 412.1699  |
| 60   | 6      | 54     | 60    | 5       | 55      | E    | 1           | 251692.701   | -0.044                     | 559.6185  |
| 60   | 7      | 54     | 60    | 6       | 55      | E    | 1           | 251692.701   | -0.044                     | 559.6185  |
| 60   | 6      | 54     | 60    | 5       | 55      | E    | 0           | 251698.191   | 0.014                      | 431.3341  |
| 60   | 7      | 54     | 60    | 6       | 55      | E    | 0           | 251698.191   | 0.013                      | 431.3341  |
| 60   | 6      | 54     | 60    | 5       | 55      | A    | 0           | 251723.262   | -0.038                     | 431.3297  |
| 60   | 7      | 54     | 60    | 6       | 55      | A    | 0           | 251723.262   | -0.038                     | 431.3297  |
| 38   | 10     | 28     | 37    | 10      | 27      | A    | 0           | 251962.232   | 0.034                      | 234.5535  |
| 38   | 10     | 28     | 37    | 10      | 27      | E    | 0           | 251967.277   | -0.004                     | 234.5613  |
| 48   | 23     | 25     | 48    | 22      | 26      | E    | 0           | 252006.622   | -0.087                     | 401.9797  |
| 48   | 23     | 26     | 48    | 22      | 27      | E    | 0           | 252045.066   | -0.016                     | 401.9717  |
| 48   | 23     | 26     | 48    | 22      | 27      | A    | 0           | 252050.992   | -0.058                     | 401.9846  |
| 48   | 23     | 25     | 48    | 22      | 26      | A    | 0           | 252050.992   | -0.058                     | 401.9846  |
| 26   | 8      | 18     | 25    | 7       | 19      | E    | 0           | 252066.730   | -0.031                     | 144.4180  |
| 26   | 8      | 18     | 25    | 7       | 19      | A    | 0           | 252075.398   | -0.040                     | 144.4093  |
| 40   | 9      | 32     | 39    | 8       | 31      | E    | 0           | 252084.217   | -0.006                     | 245.8835  |
| 40   | 9      | 32     | 39    | 8       | 31      | A    | 0           | 252102.644   | -0.000                     | 245.8768  |
| 65   | 24     | 41     | 65    | 23      | 42      | E    | 0           | 252190.278   | -0.056                     | 612.7688  |
| 65   | 24     | 42     | 65    | 23      | 43      | E    | 0           | 252225.866   | -0.055                     | 612.7619  |
| 57   | 4      | 53     | 57    | 3       | 54      | A    | 1           | 252285.700   | 0.319                      | 510.2086  |
| 57   | 5      | 53     | 57    | 4       | 54      | A    | 1           | 252285.700   | 0.319                      | 510.2086  |
| 32   | 9      | 24     | 31    | 8       | 23      | E    | 0           | 252393.365   | -0.102                     | 184.6277  |
| 40   | 14     | 27     | 39    | 14      | 26      | A    | 0           | 252439.602   | 0.046                      | 266.3477  |
| 47   | 23     | 24     | 47    | 22      | 25      | E    | 0           | 252443.907   | -0.028                     | 392.0091  |
| 32   | 9      | 24     | 31    | 8       | 23      | A    | 0           | 252459.775   | -0.034                     | 184.6186  |
| 40   | 14     | 27     | 39    | 14      | 26      | E    | 0           | 252464.637   | 0.030                      | 266.3427  |
| 40   | 14     | 26     | 39    | 14      | 25      | E    | 0           | 252469.921   | 0.056                      | 266.3557  |
| 47   | 23     | 25     | 47    | 22      | 26      | E    | 0           | 252482.545   | 0.012                      | 392.0011  |
| 40   | 14     | 26     | 39    | 14      | 25      | A    | 0           | 252486.773   | -0.078                     | 266.3494  |
| 47   | 23     | 25     | 47    | 22      | 26      | A    | 0           | 252488.077   | -0.015                     | 392.0141  |
| 47   | 23     | 24     | 47    | 22      | 25      | A    | 0           | 252488.077   | -0.015                     | 392.0141  |
| 41   | 31     | 11     | 40    | 31      | 10      | A    | 0           | 252629.030   | -0.031                     | 418.6892  |
| 41   | 31     | 10     | 40    | 31      | 9       | A    | 0           | 252629.030   | -0.031                     | 418.6892  |
| 41   | 30     | 11     | 40    | 30      | 10      | A    | 0           | 252738.950   | 0.061                      | 407.0895  |
| 41   | 30     | 12     | 40    | 30      | 11      | A    | 0           | 252738.950   | 0.061                      | 407.0895  |
| 16   | 14     | 2      | 15    | 13      | 3       | A    | 0           | 252740.937   | -0.000                     | 124.1031  |
| 16   | 14     | 3      | 15    | 13      | 2       | A    | 0           | 252740.937   | -0.000                     | 124.1031  |
| 54   | 2      | 52     | 54    | 1       | 53      | A    | 1           | 252829.997   | -0.934                     | 463.1345  |
| 54   | 3      | 52     | 54    | 2       | 53      | A    | 1           | 252829.997   | -0.934                     | 463.1345  |
| 46   | 23     | 23     | 46    | 22      | 24      | E    | 0           | 252852.420   | -0.049                     | 382.2530  |
| 44   | 5      | 39     | 43    | 5       | 38      | A    | 1           | 252889.405   | -0.061                     | 393.1460  |
| 44   | 5      | 39     | 43    | 6       | 38      | A    | 1           | 252889.405   | 0.121                      | 393.1460  |
| 44   | 6      | 39     | 43    | 5       | 38      | A    | 1           | 252889.405   | -0.155                     | 393.1460  |
| 44   | 6      | 39     | 43    | 6       | 38      | A    | 1           | 252889.405   | 0.027                      | 393.1460  |
| 46   | 23     | 24     | 46    | 22      | 25      | E    | 0           | 252891.223   | -0.050                     | 382.2450  |
| 43   | 6      | 37     | 42    | 7       | 36      | A    | 1           | 252894.955   | 0.053                      | 390.2244  |
| 46   | 23     | 24     | 46    | 22      | 25      | A    | 0           | 252896.415   | -0.037                     | 382.2581  |
| 46   | 23     | 23     | 46    | 22      | 24      | A    | 0           | 252896.415   | -0.037                     | 382.2581  |
| 43   | 7      | 37     | 42    | 7       | 36      | A    | 1           | 252898.036   | -0.077                     | 390.2244  |
| 43   | 6      | 37     | 42    | 6       | 36      | A    | 1           | 252900.765   | -0.110                     | 390.2242  |
| 43   | 7      | 37     | 42    | 6       | 36      | A    | 1           | 252904.086   | 0.000                      | 390.2242  |
| 40   | 10     | 31     | 39    | 10      | 30      | E    | 0           | 252967.998   | -0.028                     | 249.7840  |
| 40   | 10     | 31     | 39    | 10      | 30      | A    | 0           | 252971.361   | 0.005                      | 249.7781  |
| 45   | 4      | 41     | 44    | 4       | 40      | A    | 1           | 252986.763   | -0.052                     | 395.5960  |
| 45   | 4      | 41     | 44    | 5       | 40      | A    | 1           | 252986.763   | -0.048                     | 395.5960  |
| 45   | 5      | 41     | 44    | 4       | 40      | A    | 1           | 252986.763   | -0.054                     | 395.5960  |
| 45   | 5      | 41     | 44    | 5       | 40      | A    | 1           | 252986.763   | -0.050                     | 395.5960  |
| 41   | 28     | 13     | 40    | 28      | 12      | A    | 0           | 252992.015   | 0.008                      | 385.0444  |
| 41   | 28     | 14     | 40    | 28      | 13      | A    | 0           | 252992.015   | 0.008                      | 385.0444  |
| 42   | 7      | 35     | 41    | 8       | 34      | A    | 1           | 253011.959   | 0.062                      | 386.7912  |
| 62   | 7      | 55     | 62    | 6       | 56      | E    | 1           | 253020.209   | 0.165                      | 591.2002  |
| 62   | 8      | 55     | 62    | 7       | 56      | E    | 1           | 253020.209   | 0.165                      | 591.2002  |
| 44   | 5      | 39     | 43    | 5       | 38      | E    | 1           | 253021.852   | -0.085                     | 392.9357  |
| 44   | 5      | 39     | 43    | 6       | 38      | E    | 1           | 253021.852   | 0.133                      | 392.9357  |
| 44   | 6      | 39     | 43    | 5       | 38      | E    | 1           | 253021.852   | -0.198                     | 392.9357  |
| 44   | 6      | 39     | 43    | 6       | 38      | E    | 1           | 253021.852   | 0.020                      | 392.9357  |
| 43   | 7      | 37     | 42    | 7       | 36      | E    | 1           | 253054.561   | -0.054                     | 390.0262  |
| 43   | 6      | 37     | 42    | 6       | 36      | E    | 1           | 253057.836   | 0.013                      | 390.0260  |
| 43   | 7      | 37     | 42    | 6       | 36      | E    | 1           | 253061.602   | -0.003                     | 390.0260  |
| 44   | 5      | 39     | 43    | 5       | 38      | E    | 0           | 253063.020   | -0.064                     | 264.6189  |
| 44   | 6      | 39     | 43    | 6       | 38      | E    | 0           | 253063.020   | 0.034                      | 264.6190  |



| $J'$ | $K'_a$ | $K'_c$ | $J''$ | $K''_a$ | $K''_c$ | Sym. | $v_{tCH_3}$ | $\nu_{Obs.}$ | $\nu_{Obs.} - \nu_{Calc.}$ | $E_{low}$ |
|------|--------|--------|-------|---------|---------|------|-------------|--------------|----------------------------|-----------|
| 44   | 5      | 39     | 43    | 5       | 38      | A    | 0           | 253067.121   | -0.046                     | 264.6124  |
| 44   | 5      | 39     | 43    | 6       | 38      | A    | 0           | 253067.121   | 0.158                      | 264.6124  |
| 44   | 6      | 39     | 43    | 5       | 38      | A    | 0           | 253067.121   | -0.151                     | 264.6124  |
| 44   | 6      | 39     | 43    | 6       | 38      | A    | 0           | 253067.121   | 0.052                      | 264.6124  |
| 62   | 7      | 55     | 62    | 6       | 56      | E    | 0           | 253072.605   | -0.052                     | 462.9211  |
| 62   | 8      | 55     | 62    | 7       | 56      | E    | 0           | 253072.605   | -0.053                     | 462.9211  |
| 43   | 6      | 37     | 42    | 7       | 36      | E    | 0           | 253086.833   | -0.015                     | 261.7089  |
| 43   | 7      | 37     | 42    | 7       | 36      | E    | 0           | 253090.256   | -0.126                     | 261.7089  |
| 43   | 6      | 37     | 42    | 7       | 36      | A    | 0           | 253091.662   | 0.005                      | 261.7027  |
| 43   | 6      | 37     | 42    | 6       | 36      | E    | 0           | 253093.202   | -0.196                     | 261.7087  |
| 43   | 7      | 37     | 42    | 7       | 36      | A    | 0           | 253095.337   | 0.126                      | 261.7027  |
| 43   | 6      | 37     | 42    | 6       | 36      | A    | 0           | 253098.415   | 0.172                      | 261.7025  |
| 43   | 7      | 37     | 42    | 6       | 36      | A    | 0           | 253101.800   | 0.005                      | 261.7025  |
| 41   | 27     | 15     | 40    | 27      | 14      | A    | 0           | 253138.832   | -0.038                     | 374.6003  |
| 41   | 27     | 14     | 40    | 27      | 13      | A    | 0           | 253138.832   | -0.038                     | 374.6003  |
| 45   | 4      | 41     | 44    | 4       | 40      | E    | 0           | 253142.579   | -0.060                     | 267.0531  |
| 45   | 5      | 41     | 44    | 5       | 40      | E    | 0           | 253142.579   | -0.058                     | 267.0531  |
| 45   | 4      | 41     | 44    | 4       | 40      | A    | 0           | 253146.032   | -0.007                     | 267.0460  |
| 45   | 4      | 41     | 44    | 5       | 40      | A    | 0           | 253146.032   | -0.002                     | 267.0460  |
| 45   | 5      | 41     | 44    | 4       | 40      | A    | 0           | 253146.032   | -0.009                     | 267.0460  |
| 45   | 5      | 41     | 44    | 5       | 40      | A    | 0           | 253146.032   | -0.005                     | 267.0460  |
| 42   | 7      | 35     | 41    | 7       | 34      | A    | 1           | 253149.163   | 0.104                      | 386.7866  |
| 42   | 7      | 35     | 41    | 8       | 34      | E    | 1           | 253184.398   | 0.107                      | 386.5985  |
| 42   | 7      | 35     | 41    | 8       | 34      | E    | 0           | 253217.850   | -0.024                     | 258.2828  |
| 42   | 7      | 35     | 41    | 8       | 34      | A    | 0           | 253223.155   | 0.017                      | 258.2768  |
| 42   | 8      | 35     | 41    | 7       | 34      | A    | 1           | 253226.949   | 0.049                      | 386.7866  |
| 46   | 3      | 43     | 45    | 3       | 42      | E    | 1           | 253231.967   | -0.035                     | 397.3482  |
| 46   | 3      | 43     | 45    | 4       | 42      | E    | 1           | 253231.967   | -0.035                     | 397.3482  |
| 46   | 4      | 43     | 45    | 3       | 42      | E    | 1           | 253231.967   | -0.035                     | 397.3482  |
| 46   | 4      | 43     | 45    | 4       | 42      | E    | 1           | 253231.967   | -0.035                     | 397.3482  |
| 45   | 23     | 22     | 45    | 22      | 23      | E    | 0           | 253233.889   | 0.035                      | 372.7107  |
| 45   | 23     | 23     | 45    | 22      | 24      | E    | 0           | 253272.766   | -0.081                     | 372.7028  |
| 45   | 23     | 23     | 45    | 22      | 24      | A    | 0           | 253277.624   | -0.045                     | 372.7159  |
| 45   | 23     | 22     | 45    | 22      | 23      | A    | 0           | 253277.624   | -0.045                     | 372.7159  |
| 46   | 3      | 43     | 45    | 3       | 42      | E    | 0           | 253281.243   | -0.004                     | 269.0379  |
| 46   | 4      | 43     | 45    | 4       | 42      | E    | 0           | 253281.243   | -0.004                     | 269.0379  |
| 46   | 3      | 43     | 45    | 3       | 42      | A    | 0           | 253283.963   | -0.004                     | 269.0300  |
| 46   | 3      | 43     | 45    | 4       | 42      | A    | 0           | 253283.963   | -0.004                     | 269.0300  |
| 46   | 4      | 43     | 45    | 3       | 42      | A    | 0           | 253283.963   | -0.004                     | 269.0300  |
| 46   | 4      | 43     | 45    | 4       | 42      | A    | 0           | 253283.963   | -0.004                     | 269.0300  |
| 25   | 7      | 18     | 24    | 6       | 19      | E    | 0           | 253293.350   | 0.187                      | 136.6458  |
| 57   | 4      | 53     | 57    | 3       | 54      | A    | 0           | 253296.033   | 0.120                      | 381.6966  |
| 57   | 5      | 53     | 57    | 4       | 54      | A    | 0           | 253296.033   | 0.120                      | 381.6966  |
| 42   | 8      | 35     | 41    | 8       | 34      | E    | 0           | 253302.299   | -0.020                     | 258.2828  |
| 42   | 8      | 35     | 41    | 8       | 34      | A    | 0           | 253307.955   | -0.033                     | 258.2768  |
| 64   | 24     | 41     | 64    | 23      | 42      | E    | 0           | 253319.146   | -0.118                     | 599.0979  |
| 47   | 2      | 45     | 46    | 2       | 44      | A    | 1           | 253333.829   | -0.036                     | 399.1787  |
| 47   | 2      | 45     | 46    | 3       | 44      | A    | 1           | 253333.829   | -0.036                     | 399.1787  |
| 47   | 3      | 45     | 46    | 2       | 44      | A    | 1           | 253333.829   | -0.036                     | 399.1787  |
| 47   | 3      | 45     | 46    | 3       | 44      | A    | 1           | 253333.829   | -0.036                     | 399.1787  |
| 42   | 7      | 35     | 41    | 7       | 34      | E    | 1           | 253341.173   | 0.064                      | 386.5933  |
| 57   | 4      | 53     | 57    | 3       | 54      | E    | 1           | 253354.228   | -0.169                     | 509.9904  |
| 57   | 5      | 53     | 57    | 4       | 54      | E    | 1           | 253354.228   | -0.169                     | 509.9904  |
| 42   | 7      | 35     | 41    | 7       | 34      | E    | 0           | 253366.114   | -0.073                     | 258.2779  |
| 42   | 7      | 35     | 41    | 7       | 34      | A    | 0           | 253372.185   | 0.051                      | 258.2718  |
| 27   | 9      | 19     | 26    | 8       | 18      | A    | 0           | 253393.160   | 0.031                      | 152.8177  |
| 47   | 2      | 45     | 46    | 2       | 44      | E    | 1           | 253399.096   | -0.004                     | 398.8957  |
| 47   | 2      | 45     | 46    | 3       | 44      | E    | 1           | 253399.096   | -0.004                     | 398.8957  |
| 47   | 3      | 45     | 46    | 2       | 44      | E    | 1           | 253399.096   | -0.004                     | 398.8957  |
| 47   | 3      | 45     | 46    | 3       | 44      | E    | 1           | 253399.096   | -0.004                     | 398.8957  |
| 41   | 9      | 33     | 40    | 9       | 32      | A    | 1           | 253415.806   | 0.059                      | 382.7975  |
| 42   | 8      | 35     | 41    | 7       | 34      | E    | 1           | 253430.645   | -0.015                     | 386.5933  |
| 42   | 8      | 35     | 41    | 7       | 34      | E    | 0           | 253450.716   | 0.085                      | 258.2779  |
| 47   | 2      | 45     | 46    | 2       | 44      | E    | 0           | 253452.402   | 0.001                      | 270.5912  |
| 47   | 3      | 45     | 46    | 3       | 44      | E    | 0           | 253452.402   | 0.001                      | 270.5912  |
| 47   | 2      | 45     | 46    | 2       | 44      | A    | 0           | 253454.405   | 0.001                      | 270.5824  |
| 47   | 2      | 45     | 46    | 3       | 44      | A    | 0           | 253454.405   | 0.001                      | 270.5824  |
| 47   | 3      | 45     | 46    | 2       | 44      | A    | 0           | 253454.405   | 0.001                      | 270.5824  |
| 47   | 3      | 45     | 46    | 3       | 44      | A    | 0           | 253454.405   | 0.001                      | 270.5824  |
| 42   | 8      | 35     | 41    | 7       | 34      | A    | 0           | 253456.986   | 0.002                      | 258.2718  |
| 41   | 25     | 17     | 40    | 25      | 16      | A    | 0           | 253485.037   | -0.036                     | 354.8724  |
| 41   | 25     | 16     | 40    | 25      | 15      | A    | 0           | 253485.037   | -0.036                     | 354.8724  |
| 18   | 13     | 6      | 17    | 12      | 6       | E    | 0           | 253537.109   | 0.053                      | 126.1281  |
| 48   | 1      | 47     | 47    | 1       | 46      | A    | 1           | 253543.386   | 0.030                      | 400.3429  |
| 48   | 1      | 47     | 47    | 2       | 46      | A    | 1           | 253543.386   | 0.030                      | 400.3429  |
| 48   | 2      | 47     | 47    | 1       | 46      | A    | 1           | 253543.386   | 0.030                      | 400.3429  |
| 48   | 2      | 47     | 47    | 2       | 46      | A    | 1           | 253543.386   | 0.030                      | 400.3429  |
| 18   | 13     | 6      | 17    | 12      | 5       | A    | 0           | 253581.058   | 0.015                      | 126.1325  |
| 18   | 13     | 5      | 17    | 12      | 6       | A    | 0           | 253581.058   | 0.015                      | 126.1325  |
| 48   | 1      | 47     | 47    | 1       | 46      | E    | 1           | 253582.916   | -0.006                     | 400.0229  |
| 48   | 1      | 47     | 47    | 2       | 46      | E    | 1           | 253582.916   | -0.006                     | 400.0229  |
| 48   | 2      | 47     | 47    | 1       | 46      | E    | 1           | 253582.916   | -0.006                     | 400.0229  |
| 48   | 2      | 47     | 47    | 2       | 46      | E    | 1           | 253582.916   | -0.006                     | 400.0229  |
| 44   | 23     | 21     | 44    | 22      | 22      | E    | 0           | 253589.519   | -0.022                     | 363.3820  |
| 41   | 9      | 33     | 40    | 9       | 32      | E    | 1           | 253616.628   | 0.097                      | 382.6041  |
| 44   | 23     | 22     | 44    | 22      | 23      | E    | 0           | 253628.739   | 0.028                      | 363.3740  |
| 44   | 23     | 22     | 44    | 22      | 23      | A    | 0           | 253633.159   | -0.042                     | 363.3872  |
| 44   | 23     | 21     | 44    | 22      | 22      | A    | 0           | 253633.159   | -0.042                     | 363.3872  |
| 48   | 1      | 47     | 47    | 1       | 46      | E    | 0           | 253640.804   | -0.048                     | 271.7260  |
| 48   | 2      | 47     | 47    | 2       | 46      | E    | 0           | 253640.804   | -0.048                     | 271.7260  |
| 48   | 1      | 47     | 47    | 1       | 46      | A    | 0           | 253642.092   | 0.024                      | 271.7160  |
| 48   | 1      | 47     | 47    | 2       | 46      | A    | 0           | 253642.092   | 0.024                      | 271.7160  |
| 48   | 2      | 47     | 47    | 1       | 46      | A    | 0           | 253642.092   | 0.024                      | 271.7160  |
| 48   | 2      | 47     | 47    | 2       | 46      | A    | 0           | 253642.092   | 0.024                      | 271.7160  |
| 41   | 9      | 33     | 40    | 9       | 32      | A    | 0           | 253646.550   | -0.003                     | 254.2861  |
| 41   | 24     | 17     | 40    | 24      | 16      | A    | 0           | 253690.794   | -0.011                     | 345.5908  |
| 41   | 24     | 18     | 40    | 24      | 17      | A    | 0           | 253690.794   | -0.011                     | 345.5908  |
| 49   | 0      | 49     | 48    | 0       | 48      | A    | 1           | 253763.513   | 0.090                      | 401.1034  |
| 49   | 0      | 49     | 48    | 1       | 48      | A    | 1           | 253763.513   | 0.090                      | 401.1034  |
| 49   | 1      | 49     | 48    | 0       | 48      | A    | 1           | 253763.513   | 0.090                      | 401.1034  |
| 49   | 1      | 49     | 48    | 1       | 48      | A    | 1           | 253763.513   | 0.090                      | 401.1034  |
| 49   | 0      | 49     | 48    | 0       | 48      | E    | 1           | 253773.911   | -0.006                     | 400.7392  |
| 49   | 1      | 49     | 48    | 1       | 48      | E    | 1           | 253773.911   | -0.006                     | 400.7392  |
| 40   | 13     | 28     | 39    | 13      | 27      | A    | 0           | 253777.437   | 0.001                      | 261.5869  |
| 40   | 13     | 28     | 39    | 13      | 27      | E    | 0           | 253808.211   | -0.024                     | 261.5870  |
| 49   | 0      | 49     | 48    | 0       | 48      | A    | 0           | 253837.549   | -0.177                     | 272.4406  |
| 49   | 0      | 49     | 48    | 1       | 48      | A    | 0           | 253837.549   | -0.177                     | 272.4406  |
| 49   | 1      | 49     | 48    | 0       | 48      | A    | 0           | 253837.549   | -0.177                     | 272.4406  |
| 49   | 1      | 49     | 48    | 1       | 48      | A    | 0           | 253837.549   | -0.177                     | 272.4406  |
| 49   | 0      | 49     | 48    | 0       | 48      | E    | 0           | 253837.549   | 0.153                      | 272.4519  |
| 49   | 1      | 49     | 48    | 1       | 48      | E    | 0           | 253837.549   | 0.153                      | 272.4519  |
| 41   | 23     | 19     | 40    | 23      | 18      | A    | 0           | 253923.928   | 0.074                      | 336.6991  |
| 41   | 23     | 18     | 40    | 23      | 17      | A    | 0           | 253923.928   | 0.074                      | 336.6991  |
| 43   | 23     | 21     | 43    | 22      | 22      | E    | 0           | 253960.166   | -0.079                     | 354.2584  |
| 43   | 23     | 21     | 43    | 22      | 22      | A    | 0           | 253964.343   | -0.083                     | 354.2716  |
| 43   | 23     | 20     | 43    | 22      | 21      | A    | 0           | 253964.343   | -0.083                     | 354.2716  |



| $J'$ | $K'_a$ | $K'_c$ | $J''$ | $K''_a$ | $K''_c$ | Sym. | $v_{tCH_3}$ | $\nu_{Obs.}$ | $\nu_{Obs.} - \nu_{Calc.}$ | $E_{low}$ |
|------|--------|--------|-------|---------|---------|------|-------------|--------------|----------------------------|-----------|
| 54   | 2      | 52     | 54    | 1       | 53      | E    | 0           | 253985.467   | -0.005                     | 334.5413  |
| 54   | 3      | 52     | 54    | 2       | 53      | E    | 0           | 253985.467   | -0.005                     | 334.5413  |
| 54   | 2      | 52     | 54    | 1       | 53      | A    | 0           | 254026.959   | 0.163                      | 334.5316  |
| 54   | 3      | 52     | 54    | 2       | 53      | A    | 0           | 254026.959   | 0.163                      | 334.5316  |
| 64   | 8      | 56     | 64    | 7       | 57      | E    | 1           | 254119.360   | 0.198                      | 623.8436  |
| 64   | 9      | 56     | 64    | 8       | 57      | E    | 1           | 254119.360   | 0.197                      | 623.8436  |
| 40   | 13     | 27     | 39    | 13      | 26      | E    | 0           | 254153.389   | 0.001                      | 261.6075  |
| 40   | 13     | 27     | 39    | 13      | 26      | A    | 0           | 254174.006   | -0.022                     | 261.6031  |
| 54   | 2      | 52     | 54    | 1       | 53      | E    | 1           | 254179.670   | -0.002                     | 462.8237  |
| 54   | 3      | 52     | 54    | 2       | 53      | E    | 1           | 254179.670   | -0.002                     | 462.8237  |
| 41   | 22     | 19     | 40    | 22      | 18      | A    | 0           | 254189.702   | -0.049                     | 328.1991  |
| 41   | 22     | 20     | 40    | 22      | 19      | A    | 0           | 254189.702   | -0.049                     | 328.1991  |
| 41   | 22     | 20     | 40    | 22      | 19      | E    | 0           | 254191.076   | 0.063                      | 328.1857  |
| 42   | 23     | 19     | 42    | 22      | 20      | E    | 0           | 254229.239   | -0.041                     | 345.3633  |
| 64   | 8      | 56     | 64    | 7       | 57      | A    | 0           | 254236.195   | 0.078                      | 495.5695  |
| 64   | 9      | 56     | 64    | 8       | 57      | A    | 0           | 254236.195   | 0.077                      | 495.5695  |
| 39   | 9      | 30     | 38    | 9       | 29      | E    | 0           | 254266.670   | -0.067                     | 240.6724  |
| 42   | 23     | 20     | 42    | 22      | 21      | E    | 0           | 254268.786   | 0.028                      | 345.3554  |
| 42   | 23     | 20     | 42    | 22      | 21      | A    | 0           | 254272.627   | -0.025                     | 345.3687  |
| 42   | 23     | 19     | 42    | 22      | 20      | A    | 0           | 254272.627   | -0.025                     | 345.3687  |
| 39   | 9      | 30     | 38    | 9       | 29      | A    | 0           | 254279.080   | -0.014                     | 240.6645  |
| 20   | 12     | 9      | 19    | 11      | 9       | E    | 0           | 254288.217   | 0.018                      | 129.4001  |
| 20   | 12     | 8      | 19    | 11      | 8       | E    | 0           | 254300.223   | -0.057                     | 129.4132  |
| 20   | 12     | 8      | 19    | 11      | 9       | A    | 0           | 254334.217   | 0.025                      | 129.4030  |
| 63   | 24     | 40     | 63    | 23      | 41      | E    | 0           | 254347.493   | -0.095                     | 585.6573  |
| 63   | 24     | 39     | 63    | 23      | 40      | A    | 0           | 254356.395   | 0.038                      | 585.6688  |
| 41   | 21     | 21     | 40    | 21      | 20      | A    | 0           | 254495.557   | -0.015                     | 320.0928  |
| 41   | 21     | 20     | 40    | 21      | 19      | A    | 0           | 254495.557   | -0.015                     | 320.0928  |
| 41   | 21     | 21     | 40    | 21      | 20      | E    | 0           | 254497.097   | -0.025                     | 320.0797  |
| 31   | 9      | 23     | 30    | 8       | 22      | E    | 0           | 254500.343   | -0.069                     | 177.7737  |
| 41   | 8      | 33     | 40    | 8       | 32      | E    | 0           | 254505.935   | 0.003                      | 254.2174  |
| 41   | 23     | 19     | 41    | 22      | 20      | E    | 0           | 254555.525   | 0.029                      | 336.6646  |
| 41   | 23     | 19     | 41    | 22      | 20      | A    | 0           | 254559.087   | -0.035                     | 336.6780  |
| 41   | 23     | 18     | 41    | 22      | 19      | A    | 0           | 254559.087   | -0.035                     | 336.6780  |
| 31   | 9      | 23     | 30    | 8       | 22      | A    | 0           | 254566.295   | -0.011                     | 177.7646  |
| 24   | 10     | 15     | 23    | 9       | 14      | A    | 0           | 254692.365   | 0.040                      | 139.8199  |
| 24   | 10     | 15     | 23    | 9       | 15      | E    | 0           | 254720.881   | -0.034                     | 139.8183  |
| 40   | 23     | 17     | 40    | 22      | 18      | E    | 0           | 254726.424   | -0.054                     | 139.8303  |
| 22   | 11     | 12     | 21    | 10      | 12      | E    | 0           | 254781.841   | -0.061                     | 328.1937  |
| 40   | 23     | 18     | 40    | 22      | 19      | E    | 0           | 254806.218   | -0.023                     | 133.9440  |
| 24   | 10     | 14     | 23    | 9       | 15      | A    | 0           | 254821.699   | 0.058                      | 328.1857  |
| 41   | 20     | 21     | 40    | 20      | 20      | A    | 0           | 254850.497   | -0.038                     | 312.3830  |
| 41   | 20     | 22     | 40    | 20      | 21      | A    | 0           | 254850.497   | -0.038                     | 312.3830  |
| 41   | 20     | 21     | 40    | 20      | 20      | E    | 0           | 254852.266   | 0.017                      | 312.3807  |
| 66   | 9      | 57     | 66    | 8       | 58      | E    | 1           | 254977.277   | 0.426                      | 657.5428  |
| 66   | 10     | 57     | 66    | 9       | 58      | E    | 1           | 254977.277   | 0.418                      | 657.5428  |
| 39   | 23     | 17     | 39    | 22      | 18      | E    | 0           | 255068.358   | 0.037                      | 319.9183  |
| 39   | 23     | 17     | 39    | 22      | 18      | A    | 0           | 255071.436   | -0.032                     | 319.9317  |
| 39   | 23     | 16     | 39    | 22      | 17      | A    | 0           | 255071.436   | -0.032                     | 319.9317  |
| 40   | 12     | 29     | 39    | 12      | 28      | A    | 0           | 255074.072   | -0.020                     | 257.3050  |
| 59   | 5      | 54     | 59    | 4       | 55      | A    | 0           | 255109.706   | -0.012                     | 411.6472  |
| 59   | 6      | 54     | 59    | 5       | 55      | A    | 0           | 255109.706   | -0.012                     | 411.6472  |
| 39   | 11     | 28     | 38    | 11      | 27      | A    | 0           | 255114.010   | 0.007                      | 245.5613  |
| 59   | 5      | 54     | 59    | 4       | 55      | E    | 1           | 255122.340   | -0.185                     | 539.9381  |
| 59   | 6      | 54     | 59    | 5       | 55      | E    | 1           | 255122.340   | -0.185                     | 539.9381  |
| 39   | 11     | 28     | 38    | 11      | 27      | E    | 0           | 255125.346   | 0.015                      | 245.5674  |
| 66   | 9      | 57     | 66    | 8       | 58      | A    | 0           | 255135.584   | -0.126                     | 529.2789  |
| 66   | 10     | 57     | 66    | 9       | 58      | A    | 0           | 255135.584   | -0.133                     | 529.2789  |
| 40   | 11     | 30     | 39    | 11      | 29      | A    | 0           | 255226.756   | -0.144                     | 253.4420  |
| 40   | 11     | 30     | 39    | 11      | 29      | E    | 0           | 255228.127   | -0.014                     | 253.4471  |
| 38   | 23     | 15     | 38    | 22      | 16      | E    | 0           | 255256.622   | -0.035                     | 311.8699  |
| 41   | 19     | 23     | 40    | 19      | 22      | A    | 0           | 255266.871   | -0.038                     | 305.0733  |
| 41   | 19     | 22     | 40    | 19      | 21      | A    | 0           | 255266.871   | -0.039                     | 305.0733  |
| 41   | 19     | 22     | 40    | 19      | 21      | E    | 0           | 255268.921   | 0.175                      | 305.0726  |
| 62   | 24     | 38     | 62    | 23      | 39      | E    | 0           | 255277.826   | -0.049                     | 572.4462  |
| 38   | 23     | 16     | 38    | 22      | 17      | E    | 0           | 255296.598   | -0.013                     | 311.8620  |
| 38   | 23     | 16     | 38    | 22      | 17      | A    | 0           | 255299.512   | -0.034                     | 311.8755  |
| 38   | 23     | 15     | 38    | 22      | 16      | A    | 0           | 255299.512   | -0.034                     | 311.8755  |
| 62   | 24     | 39     | 62    | 23      | 40      | E    | 0           | 255315.111   | 0.018                      | 572.4393  |
| 62   | 24     | 38     | 62    | 23      | 39      | A    | 0           | 255323.042   | 0.023                      | 572.4510  |
| 28   | 9      | 20     | 27    | 8       | 19      | E    | 0           | 255421.181   | -0.068                     | 158.6745  |
| 37   | 23     | 14     | 37    | 22      | 15      | E    | 0           | 255467.478   | -0.014                     | 304.0244  |
| 28   | 9      | 20     | 27    | 8       | 19      | A    | 0           | 255481.629   | -0.004                     | 158.6659  |
| 37   | 23     | 15     | 37    | 22      | 16      | E    | 0           | 255507.594   | 0.055                      | 304.0165  |
| 37   | 23     | 15     | 37    | 22      | 16      | A    | 0           | 255510.245   | -0.032                     | 304.0300  |
| 37   | 23     | 14     | 37    | 22      | 15      | A    | 0           | 255510.245   | -0.032                     | 304.0300  |
| 36   | 23     | 13     | 36    | 22      | 14      | E    | 0           | 255661.936   | -0.020                     | 296.3894  |
| 36   | 23     | 14     | 36    | 22      | 15      | E    | 0           | 255702.146   | 0.058                      | 296.3814  |
| 36   | 23     | 14     | 36    | 22      | 15      | A    | 0           | 255704.630   | -0.014                     | 296.3950  |
| 36   | 23     | 13     | 36    | 22      | 14      | A    | 0           | 255704.630   | -0.014                     | 296.3950  |
| 41   | 18     | 23     | 40    | 18      | 22      | A    | 0           | 255761.435   | -0.035                     | 298.1683  |
| 41   | 18     | 24     | 40    | 18      | 23      | A    | 0           | 255761.435   | -0.032                     | 298.1683  |
| 35   | 23     | 12     | 35    | 22      | 13      | E    | 0           | 255840.969   | -0.019                     | 288.9644  |
| 41   | 9      | 33     | 40    | 8       | 32      | E    | 0           | 255880.036   | -0.035                     | 254.2174  |
| 35   | 23     | 13     | 35    | 22      | 14      | E    | 0           | 255881.291   | 0.097                      | 288.9565  |
| 35   | 23     | 13     | 35    | 22      | 14      | A    | 0           | 255883.553   | -0.030                     | 288.9700  |
| 35   | 23     | 12     | 35    | 22      | 13      | A    | 0           | 255883.553   | -0.030                     | 288.9700  |
| 41   | 9      | 33     | 40    | 8       | 32      | A    | 0           | 255894.495   | -0.019                     | 254.2111  |
| 30   | 9      | 22     | 29    | 8       | 21      | E    | 0           | 255899.035   | -0.093                     | 171.1545  |
| 34   | 23     | 11     | 34    | 22      | 12      | E    | 0           | 256005.477   | -0.008                     | 281.7492  |
| 34   | 23     | 12     | 34    | 22      | 13      | E    | 0           | 256045.782   | 0.023                      | 281.7413  |
| 34   | 23     | 12     | 34    | 22      | 13      | A    | 0           | 256047.953   | -0.042                     | 281.7549  |
| 34   | 23     | 11     | 34    | 22      | 12      | A    | 0           | 256047.953   | -0.042                     | 281.7549  |
| 70   | 11     | 59     | 70    | 10      | 60      | A    | 0           | 256142.530   | -0.091                     | 599.8458  |
| 70   | 12     | 59     | 70    | 11      | 60      | A    | 0           | 256142.530   | -0.214                     | 599.8458  |
| 33   | 23     | 10     | 33    | 22      | 11      | E    | 0           | 256156.262   | -0.048                     | 274.7436  |
| 61   | 24     | 37     | 61    | 23      | 38      | E    | 0           | 256187.820   | -0.085                     | 559.4500  |
| 33   | 23     | 11     | 33    | 22      | 12      | E    | 0           | 256196.691   | 0.047                      | 274.7357  |
| 33   | 23     | 11     | 33    | 22      | 12      | A    | 0           | 256198.688   | -0.052                     | 274.7493  |
| 33   | 23     | 10     | 33    | 22      | 11      | A    | 0           | 256198.688   | -0.052                     | 274.7493  |
| 61   | 24     | 38     | 61    | 23      | 39      | E    | 0           | 256225.522   | -0.074                     | 559.4431  |
| 61   | 24     | 37     | 61    | 23      | 38      | A    | 0           | 256232.715   | 0.010                      | 559.4549  |
| 29   | 9      | 21     | 28    | 8       | 20      | A    | 0           | 256331.178   | -0.061                     | 164.7762  |
| 32   | 23     | 10     | 32    | 22      | 11      | A    | 0           | 256336.502   | -0.139                     | 267.9528  |
| 32   | 23     | 9      | 32    | 22      | 10      | A    | 0           | 256336.502   | -0.139                     | 267.9528  |
| 41   | 17     | 25     | 40    | 17      | 24      | A    | 0           | 256357.905   | -0.014                     | 291.6743  |
| 41   | 17     | 24     | 40    | 17      | 23      | E    | 0           | 256359.982   | -0.033                     | 291.6768  |
| 41   | 17     | 25     | 40    | 17      | 24      | E    | 0           | 256361.267   | -0.015                     | 291.6644  |
| 31   | 23     | 8      | 31    | 22      | 9       | E    | 0           | 256420.158   | -0.048                     | 261.3595  |
| 31   | 23     | 9      | 31    | 22      | 10      | E    | 0           | 256460.708   | 0.068                      | 261.3516  |
| 31   | 23     | 9      | 31    | 22      | 10      | A    | 0           | 256462.451   | -0.039                     | 261.3652  |
| 31   | 23     | 8      | 31    | 22      | 9       | A    | 0           | 256462.451   | -0.039                     | 261.3652  |
| 30   | 23     | 7      | 30    | 22      | 8       | E    | 0           | 256534.794   | -0.032                     | 254.9806  |
| 30   | 23     | 8      | 30    | 22      | 9       | A    | 0           | 256577.041   | -0.004                     | 254.9863  |
| 30   | 23     | 7      | 30    | 22      | 8       | A    | 0           | 256577.041   | -0.004                     | 254.9863  |



| $J'$ | $K'_a$ | $K'_c$ | $J''$ | $K''_a$ | $K''_c$ | Sym. | $v_{tCH_3}$ | $\nu_{Obs.}$ | $\nu_{Obs.} - \nu_{Calc.}$ | $E_{low}$ |
|------|--------|--------|-------|---------|---------|------|-------------|--------------|----------------------------|-----------|
| 29   | 23     | 6      | 29    | 22      | 7       | E    | 0           | 256638.870   | -0.006                     | 248.8100  |
| 29   | 23     | 7      | 29    | 22      | 8       | E    | 0           | 256679.488   | 0.099                      | 248.8021  |
| 29   | 23     | 7      | 29    | 22      | 8       | A    | 0           | 256680.974   | -0.060                     | 248.8157  |
| 29   | 23     | 6      | 29    | 22      | 7       | A    | 0           | 256680.974   | -0.060                     | 248.8157  |
| 61   | 6      | 55     | 61    | 5       | 56      | E    | 1           | 256688.653   | -0.059                     | 570.9596  |
| 61   | 7      | 55     | 61    | 6       | 56      | E    | 1           | 256688.653   | -0.059                     | 570.9596  |
| 61   | 6      | 55     | 61    | 5       | 56      | A    | 0           | 256720.866   | -0.025                     | 442.6734  |
| 61   | 7      | 55     | 61    | 6       | 56      | A    | 0           | 256720.866   | -0.025                     | 442.6734  |
| 28   | 23     | 5      | 28    | 22      | 6       | E    | 0           | 256733.070   | 0.016                      | 242.8475  |
| 28   | 23     | 6      | 28    | 22      | 7       | E    | 0           | 256773.684   | 0.088                      | 242.8396  |
| 28   | 23     | 6      | 28    | 22      | 7       | A    | 0           | 256775.092   | -0.062                     | 242.8533  |
| 28   | 23     | 5      | 28    | 22      | 6       | A    | 0           | 256775.092   | -0.062                     | 242.8533  |
| 27   | 23     | 4      | 27    | 22      | 5       | E    | 0           | 256817.991   | -0.037                     | 237.0929  |
| 27   | 23     | 5      | 27    | 22      | 6       | A    | 0           | 256860.048   | -0.027                     | 237.0987  |
| 27   | 23     | 4      | 27    | 22      | 5       | A    | 0           | 256860.048   | -0.027                     | 237.0987  |
| 26   | 23     | 4      | 26    | 22      | 5       | E    | 0           | 256935.038   | 0.008                      | 231.5380  |
| 26   | 23     | 4      | 26    | 22      | 5       | A    | 0           | 256936.378   | -0.059                     | 231.5517  |
| 26   | 23     | 3      | 26    | 22      | 4       | A    | 0           | 256936.378   | -0.059                     | 231.5517  |
| 60   | 24     | 36     | 60    | 23      | 37      | E    | 0           | 257044.409   | -0.036                     | 546.6748  |
| 60   | 24     | 37     | 60    | 23      | 38      | E    | 0           | 257082.528   | -0.048                     | 546.6679  |
| 60   | 24     | 36     | 60    | 23      | 37      | A    | 0           | 257088.889   | -0.015                     | 546.6799  |
| 41   | 16     | 25     | 40    | 16      | 24      | A    | 0           | 257091.793   | -0.077                     | 285.6002  |
| 41   | 16     | 26     | 40    | 16      | 25      | E    | 0           | 257095.515   | -0.067                     | 285.5915  |
| 58   | 4      | 54     | 58    | 3       | 55      | A    | 1           | 257223.439   | 0.380                      | 520.7035  |
| 58   | 5      | 54     | 58    | 4       | 55      | A    | 1           | 257223.439   | 0.380                      | 520.7035  |
| 40   | 12     | 28     | 39    | 12      | 27      | A    | 0           | 257464.193   | -0.019                     | 257.4279  |
| 40   | 12     | 28     | 39    | 12      | 27      | E    | 0           | 257470.756   | -0.019                     | 257.4323  |
| 42   | 8      | 34     | 41    | 9       | 33      | A    | 1           | 257736.062   | 0.060                      | 391.2505  |
| 42   | 8      | 34     | 41    | 9       | 33      | E    | 1           | 257838.987   | -0.036                     | 391.0638  |
| 59   | 24     | 35     | 59    | 23      | 36      | E    | 0           | 257850.669   | -0.008                     | 534.1199  |
| 42   | 9      | 33     | 41    | 10      | 32      | A    | 0           | 257891.789   | -0.141                     | 266.8383  |
| 59   | 24     | 35     | 59    | 23      | 36      | A    | 0           | 257894.742   | -0.064                     | 534.1251  |
| 42   | 8      | 34     | 41    | 9       | 33      | E    | 0           | 257907.767   | -0.177                     | 262.7527  |
| 42   | 8      | 34     | 41    | 9       | 33      | A    | 0           | 257910.578   | -0.031                     | 262.7468  |
| 15   | 15     | 0      | 14    | 14      | 0       | E    | 0           | 257980.027   | -0.059                     | 126.1757  |
| 15   | 15     | 1      | 14    | 14      | 1       | E    | 0           | 257984.904   | 0.032                      | 126.1620  |
| 44   | 6      | 38     | 43    | 7       | 37      | A    | 1           | 257993.194   | 0.008                      | 398.6602  |
| 44   | 7      | 38     | 43    | 7       | 37      | A    | 1           | 257994.928   | 0.027                      | 398.6602  |
| 44   | 7      | 38     | 43    | 6       | 37      | A    | 1           | 257998.177   | 0.065                      | 398.6600  |
| 45   | 5      | 40     | 44    | 5       | 39      | A    | 1           | 258002.430   | -0.024                     | 401.5815  |
| 45   | 5      | 40     | 44    | 6       | 39      | A    | 1           | 258002.430   | 0.069                      | 401.5815  |
| 45   | 6      | 40     | 44    | 5       | 39      | A    | 1           | 258002.430   | -0.072                     | 401.5815  |
| 45   | 6      | 40     | 44    | 6       | 39      | A    | 1           | 258002.430   | 0.021                      | 401.5815  |
| 41   | 15     | 27     | 40    | 15      | 26      | A    | 0           | 258013.307   | -0.041                     | 279.9586  |
| 41   | 15     | 26     | 40    | 15      | 25      | E    | 0           | 258020.189   | -0.034                     | 279.9645  |
| 15   | 15     | 1      | 14    | 14      | 0       | A    | 0           | 258023.431   | 0.002                      | 126.1694  |
| 15   | 15     | 0      | 14    | 14      | 1       | A    | 0           | 258023.431   | 0.002                      | 126.1694  |
| 63   | 7      | 56     | 63    | 6       | 57      | E    | 1           | 258043.893   | 0.072                      | 603.0492  |
| 63   | 8      | 56     | 63    | 7       | 57      | E    | 1           | 258043.893   | 0.072                      | 603.0492  |
| 63   | 7      | 56     | 63    | 6       | 57      | E    | 0           | 258098.204   | -0.039                     | 474.7728  |
| 63   | 8      | 56     | 63    | 7       | 57      | E    | 0           | 258098.204   | -0.039                     | 474.7728  |
| 46   | 4      | 42     | 45    | 4       | 41      | A    | 1           | 258107.343   | -0.051                     | 404.0347  |
| 46   | 4      | 42     | 45    | 5       | 41      | A    | 1           | 258107.343   | -0.049                     | 404.0347  |
| 46   | 5      | 42     | 45    | 4       | 41      | A    | 1           | 258107.343   | -0.052                     | 404.0347  |
| 46   | 5      | 42     | 45    | 5       | 41      | A    | 1           | 258107.343   | -0.050                     | 404.0347  |
| 43   | 7      | 36     | 42    | 8       | 35      | A    | 1           | 258114.657   | 0.078                      | 395.2334  |
| 63   | 7      | 56     | 63    | 6       | 57      | A    | 0           | 258120.015   | -0.115                     | 474.7696  |
| 63   | 8      | 56     | 63    | 7       | 57      | A    | 0           | 258120.015   | -0.115                     | 474.7696  |
| 45   | 5      | 40     | 44    | 5       | 39      | E    | 1           | 258133.534   | -0.057                     | 401.3756  |
| 45   | 5      | 40     | 44    | 6       | 39      | E    | 1           | 258133.534   | 0.056                      | 401.3756  |
| 45   | 6      | 40     | 44    | 5       | 39      | E    | 1           | 258133.534   | -0.115                     | 401.3756  |
| 45   | 6      | 40     | 44    | 6       | 39      | E    | 1           | 258133.534   | -0.002                     | 401.3756  |
| 44   | 6      | 38     | 43    | 7       | 37      | E    | 1           | 258147.161   | -0.027                     | 398.4672  |
| 44   | 7      | 38     | 43    | 7       | 37      | E    | 1           | 258149.213   | -0.007                     | 398.4672  |
| 44   | 6      | 38     | 43    | 6       | 37      | E    | 1           | 258150.942   | -0.028                     | 398.4671  |
| 44   | 7      | 38     | 43    | 6       | 37      | E    | 1           | 258153.101   | 0.099                      | 398.4671  |
| 43   | 8      | 36     | 42    | 8       | 35      | A    | 1           | 258158.348   | 0.021                      | 395.2334  |
| 45   | 5      | 40     | 44    | 5       | 39      | E    | 0           | 258176.739   | -0.025                     | 273.0602  |
| 45   | 6      | 40     | 44    | 6       | 39      | E    | 0           | 258176.739   | 0.026                      | 273.0602  |
| 45   | 5      | 40     | 44    | 5       | 39      | A    | 0           | 258180.792   | -0.016                     | 273.0538  |
| 45   | 5      | 40     | 44    | 6       | 39      | A    | 0           | 258180.792   | 0.089                      | 273.0538  |
| 45   | 6      | 40     | 44    | 5       | 39      | A    | 0           | 258180.792   | -0.070                     | 273.0538  |
| 45   | 6      | 40     | 44    | 6       | 39      | A    | 0           | 258180.792   | 0.035                      | 273.0538  |
| 44   | 6      | 38     | 43    | 7       | 37      | E    | 0           | 258185.496   | 0.010                      | 270.1511  |
| 44   | 7      | 38     | 43    | 7       | 37      | E    | 0           | 258187.341   | -0.037                     | 270.1511  |
| 44   | 6      | 38     | 43    | 6       | 37      | E    | 0           | 258188.961   | -0.057                     | 270.1510  |
| 44   | 7      | 38     | 43    | 7       | 37      | A    | 0           | 258192.250   | 0.109                      | 270.1451  |
| 44   | 6      | 38     | 43    | 6       | 37      | A    | 0           | 258193.776   | -0.014                     | 270.1449  |
| 44   | 7      | 38     | 43    | 6       | 37      | A    | 0           | 258195.687   | -0.007                     | 270.1449  |
| 46   | 4      | 42     | 45    | 4       | 41      | E    | 1           | 258217.007   | -0.054                     | 403.8099  |
| 46   | 4      | 42     | 45    | 5       | 41      | E    | 1           | 258217.007   | -0.051                     | 403.8099  |
| 46   | 5      | 42     | 45    | 4       | 41      | E    | 1           | 258217.007   | -0.055                     | 403.8099  |
| 46   | 5      | 42     | 45    | 5       | 41      | E    | 1           | 258217.007   | -0.053                     | 403.8099  |
| 43   | 8      | 36     | 42    | 7       | 35      | A    | 1           | 258236.276   | 0.107                      | 395.2308  |
| 58   | 4      | 54     | 58    | 3       | 55      | A    | 0           | 258251.661   | 0.077                      | 392.1966  |
| 58   | 5      | 54     | 58    | 4       | 55      | A    | 0           | 258251.661   | 0.077                      | 392.1966  |
| 46   | 4      | 42     | 45    | 4       | 41      | E    | 0           | 258264.217   | -0.002                     | 275.4971  |
| 46   | 5      | 42     | 45    | 5       | 41      | E    | 0           | 258264.217   | -0.001                     | 275.4971  |
| 47   | 3      | 44     | 46    | 3       | 43      | A    | 1           | 258267.535   | 0.057                      | 406.0448  |
| 47   | 3      | 44     | 46    | 4       | 43      | A    | 1           | 258267.535   | 0.057                      | 406.0448  |
| 47   | 4      | 44     | 46    | 3       | 43      | A    | 1           | 258267.535   | 0.057                      | 406.0448  |
| 47   | 4      | 44     | 46    | 4       | 43      | A    | 1           | 258267.535   | 0.057                      | 406.0448  |
| 43   | 7      | 36     | 42    | 8       | 35      | E    | 1           | 258288.918   | -0.048                     | 395.0468  |
| 43   | 7      | 36     | 42    | 8       | 35      | E    | 0           | 258323.423   | 0.248                      | 266.7321  |
| 43   | 8      | 36     | 42    | 8       | 35      | E    | 1           | 258339.631   | 0.024                      | 395.0468  |
| 47   | 3      | 44     | 46    | 3       | 43      | E    | 1           | 258355.514   | -0.025                     | 405.7951  |
| 47   | 3      | 44     | 46    | 4       | 43      | E    | 1           | 258355.514   | -0.025                     | 405.7951  |
| 47   | 4      | 44     | 46    | 3       | 43      | E    | 1           | 258355.514   | -0.025                     | 405.7951  |
| 47   | 4      | 44     | 46    | 4       | 43      | E    | 1           | 258355.514   | -0.025                     | 405.7951  |
| 43   | 8      | 36     | 42    | 8       | 35      | E    | 0           | 258370.762   | -0.027                     | 266.7321  |
| 43   | 8      | 36     | 42    | 8       | 35      | A    | 0           | 258376.113   | -0.266                     | 266.7262  |
| 43   | 7      | 36     | 42    | 7       | 35      | E    | 1           | 258378.531   | 0.013                      | 395.0439  |
| 47   | 3      | 44     | 46    | 3       | 43      | E    | 0           | 258406.398   | -0.010                     | 277.4864  |
| 47   | 4      | 44     | 46    | 4       | 43      | E    | 0           | 258406.398   | -0.010                     | 277.4864  |
| 43   | 7      | 36     | 42    | 7       | 35      | E    | 0           | 258407.723   | 0.104                      | 266.7293  |
| 47   | 3      | 44     | 46    | 3       | 43      | A    | 0           | 258409.100   | -0.015                     | 277.4786  |
| 47   | 3      | 44     | 46    | 4       | 43      | A    | 0           | 258409.100   | -0.015                     | 277.4786  |
| 47   | 4      | 44     | 46    | 3       | 43      | A    | 0           | 258409.100   | -0.015                     | 277.4786  |
| 47   | 4      | 44     | 46    | 4       | 43      | A    | 0           | 258409.100   | -0.015                     | 277.4786  |
| 43   | 7      | 36     | 42    | 7       | 35      | A    | 0           | 258413.377   | -0.000                     | 266.7234  |
| 43   | 8      | 36     | 42    | 7       | 35      | E    | 1           | 258429.179   | 0.020                      | 395.0439  |
| 43   | 8      | 36     | 42    | 7       | 35      | E    | 0           | 258455.209   | -0.025                     | 266.7293  |
| 48   | 2      | 46     | 47    | 2       | 45      | A    | 1           | 258459.241   | -0.058                     | 407.6290  |
| 48   | 2      | 46     | 47    | 3       | 45      | A    | 1           | 258459.241   | -0.058                     | 407.6290  |
| 48   | 3      | 46     | 47    | 2       | 45      | A    | 1           | 258459.241   | -0.058                     | 407.6290  |
| 48   | 3      | 46     | 47    | 3       | 45      | A    | 1           | 258459.241   | -0.058                     | 407.6290  |



| $J'$ | $K'_a$ | $K'_c$ | $J''$ | $K''_a$ | $K''_c$ | Sym. | $v_{tCH_3}$ | $\nu_{Obs.}$ | $\nu_{Obs.} - \nu_{Calc.}$ | $E_{low}$ |
|------|--------|--------|-------|---------|---------|------|-------------|--------------|----------------------------|-----------|
| 43   | 8      | 36     | 42    | 7       | 35      | A    | 0           | 258461.227   | -0.003                     | 266.7234  |
| 41   | 10     | 32     | 40    | 10      | 31      | E    | 0           | 258475.888   | -0.025                     | 258.2221  |
| 41   | 10     | 32     | 40    | 10      | 31      | A    | 0           | 258480.253   | 0.085                      | 258.2163  |
| 42   | 9      | 34     | 41    | 9       | 33      | A    | 1           | 258509.202   | 0.052                      | 391.2505  |
| 48   | 2      | 46     | 47    | 2       | 45      | E    | 1           | 258524.308   | -0.003                     | 407.3482  |
| 48   | 3      | 46     | 47    | 3       | 45      | E    | 1           | 258524.308   | -0.003                     | 407.3482  |
| 48   | 2      | 46     | 47    | 2       | 45      | E    | 0           | 258579.110   | -0.006                     | 279.0455  |
| 48   | 3      | 46     | 47    | 3       | 45      | E    | 0           | 258579.110   | -0.006                     | 279.0455  |
| 48   | 2      | 46     | 47    | 2       | 45      | A    | 0           | 258581.120   | 0.009                      | 279.0367  |
| 48   | 2      | 46     | 47    | 3       | 45      | A    | 0           | 258581.120   | 0.009                      | 279.0367  |
| 48   | 3      | 46     | 47    | 3       | 45      | A    | 0           | 258581.120   | 0.009                      | 279.0367  |
| 48   | 3      | 46     | 47    | 3       | 45      | A    | 0           | 258581.120   | 0.009                      | 279.0367  |
| 58   | 24     | 35     | 58    | 23      | 36      | E    | 0           | 258648.432   | -0.026                     | 521.7779  |
| 58   | 24     | 34     | 58    | 23      | 35      | A    | 0           | 258653.325   | -0.019                     | 521.7901  |
| 49   | 1      | 48     | 48    | 1       | 47      | A    | 1           | 258669.386   | 0.010                      | 408.8002  |
| 49   | 1      | 48     | 48    | 2       | 47      | A    | 1           | 258669.386   | 0.010                      | 408.8002  |
| 49   | 2      | 48     | 48    | 1       | 47      | A    | 1           | 258669.386   | 0.010                      | 408.8002  |
| 49   | 2      | 48     | 48    | 2       | 47      | A    | 1           | 258669.386   | 0.010                      | 408.8002  |
| 49   | 1      | 48     | 48    | 1       | 47      | E    | 1           | 258708.836   | 0.001                      | 408.4815  |
| 49   | 2      | 48     | 48    | 2       | 47      | E    | 1           | 258708.836   | 0.001                      | 408.4815  |
| 42   | 9      | 34     | 41    | 9       | 33      | E    | 1           | 258712.308   | 0.042                      | 391.0638  |
| 42   | 9      | 34     | 41    | 9       | 33      | E    | 0           | 258737.553   | 0.003                      | 262.7527  |
| 42   | 9      | 34     | 41    | 9       | 33      | A    | 0           | 258743.668   | -0.026                     | 262.7468  |
| 49   | 1      | 48     | 48    | 1       | 47      | E    | 0           | 258768.156   | -0.027                     | 280.1866  |
| 49   | 2      | 48     | 48    | 2       | 47      | E    | 0           | 258768.156   | -0.027                     | 280.1866  |
| 49   | 1      | 48     | 48    | 1       | 47      | A    | 0           | 258769.410   | 0.015                      | 280.1766  |
| 49   | 1      | 48     | 48    | 2       | 47      | A    | 0           | 258769.410   | 0.015                      | 280.1766  |
| 49   | 2      | 48     | 48    | 1       | 47      | A    | 0           | 258769.410   | 0.015                      | 280.1766  |
| 49   | 2      | 48     | 48    | 2       | 47      | A    | 0           | 258769.410   | 0.015                      | 280.1766  |
| 17   | 14     | 3      | 16    | 13      | 4       | A    | 0           | 258884.913   | -0.004                     | 127.3912  |
| 17   | 14     | 4      | 16    | 13      | 3       | A    | 0           | 258884.913   | -0.004                     | 127.3912  |
| 50   | 0      | 50     | 49    | 0       | 49      | A    | 1           | 258889.820   | 0.110                      | 409.5680  |
| 50   | 0      | 50     | 49    | 1       | 49      | A    | 1           | 258889.820   | 0.110                      | 409.5680  |
| 50   | 1      | 50     | 49    | 0       | 49      | A    | 1           | 258889.820   | 0.110                      | 409.5680  |
| 50   | 1      | 50     | 49    | 1       | 49      | A    | 1           | 258889.820   | 0.110                      | 409.5680  |
| 50   | 0      | 50     | 49    | 0       | 49      | E    | 1           | 258900.119   | 0.004                      | 409.2042  |
| 50   | 0      | 50     | 49    | 1       | 49      | E    | 1           | 258900.119   | 0.004                      | 409.2042  |
| 50   | 1      | 50     | 49    | 0       | 49      | E    | 1           | 258900.119   | 0.004                      | 409.2042  |
| 50   | 1      | 50     | 49    | 1       | 49      | E    | 1           | 258900.119   | 0.004                      | 409.2042  |
| 39   | 10     | 29     | 38    | 10      | 28      | A    | 0           | 258940.237   | -0.052                     | 242.9581  |
| 39   | 10     | 29     | 38    | 10      | 28      | E    | 0           | 258941.610   | -0.025                     | 242.9660  |
| 50   | 0      | 50     | 49    | 0       | 49      | A    | 0           | 258965.107   | -0.172                     | 280.9077  |
| 50   | 0      | 50     | 49    | 1       | 49      | A    | 0           | 258965.107   | -0.172                     | 280.9077  |
| 50   | 1      | 50     | 49    | 0       | 49      | A    | 0           | 258965.107   | -0.172                     | 280.9077  |
| 50   | 1      | 50     | 49    | 1       | 49      | A    | 0           | 258965.107   | -0.172                     | 280.9077  |
| 50   | 0      | 50     | 49    | 0       | 49      | E    | 0           | 258965.107   | 0.156                      | 280.9190  |
| 50   | 1      | 50     | 49    | 1       | 49      | E    | 0           | 258965.107   | 0.156                      | 280.9190  |
| 60   | 5      | 55     | 60    | 4       | 56      | A    | 1           | 259134.835   | -0.429                     | 551.1151  |
| 60   | 6      | 55     | 60    | 5       | 56      | A    | 1           | 259134.835   | -0.429                     | 551.1151  |
| 65   | 8      | 57     | 65    | 7       | 58      | E    | 1           | 259177.410   | 0.176                      | 636.2011  |
| 65   | 8      | 57     | 65    | 8       | 58      | E    | 1           | 259177.410   | 0.175                      | 636.2011  |
| 41   | 14     | 28     | 40    | 14      | 27      | A    | 0           | 259190.324   | 0.013                      | 274.7682  |
| 41   | 14     | 28     | 40    | 14      | 27      | E    | 0           | 259225.315   | -0.079                     | 274.7641  |
| 42   | 8      | 34     | 41    | 8       | 33      | E    | 1           | 259280.724   | 0.000                      | 391.0157  |
| 42   | 8      | 34     | 41    | 8       | 33      | E    | 0           | 259282.085   | 0.002                      | 262.7068  |
| 42   | 8      | 34     | 41    | 8       | 33      | A    | 0           | 259290.243   | 0.013                      | 262.7008  |
| 65   | 8      | 57     | 65    | 7       | 58      | A    | 0           | 259296.570   | -0.126                     | 507.9300  |
| 65   | 9      | 57     | 65    | 8       | 58      | A    | 0           | 259296.570   | -0.126                     | 507.9300  |
| 57   | 24     | 33     | 57    | 23      | 34      | E    | 0           | 259323.689   | -0.019                     | 509.6686  |
| 57   | 24     | 34     | 57    | 23      | 35      | E    | 0           | 259362.918   | -0.073                     | 509.6617  |
| 57   | 24     | 33     | 57    | 23      | 34      | A    | 0           | 259367.173   | -0.043                     | 509.6741  |
| 57   | 24     | 34     | 57    | 23      | 35      | A    | 0           | 259367.173   | -0.045                     | 509.6741  |
| 19   | 13     | 7      | 18    | 12      | 7       | E    | 0           | 259664.478   | 0.024                      | 129.8365  |
| 19   | 13     | 6      | 18    | 12      | 6       | E    | 0           | 259670.825   | -0.058                     | 129.8500  |
| 19   | 13     | 7      | 18    | 12      | 6       | A    | 0           | 259708.483   | -0.001                     | 129.8409  |
| 19   | 13     | 6      | 18    | 12      | 7       | A    | 0           | 259708.483   | -0.001                     | 129.8409  |
| 42   | 25     | 18     | 41    | 25      | 17      | A    | 0           | 259782.403   | -0.057                     | 363.3278  |
| 42   | 25     | 17     | 41    | 25      | 16      | A    | 0           | 259782.403   | -0.057                     | 363.3278  |
| 56   | 24     | 32     | 56    | 23      | 33      | E    | 0           | 259995.644   | -0.062                     | 497.7708  |
| 42   | 24     | 18     | 41    | 24      | 17      | A    | 0           | 260003.694   | -0.079                     | 354.0530  |
| 42   | 24     | 19     | 41    | 24      | 18      | A    | 0           | 260003.694   | -0.079                     | 354.0530  |
| 56   | 24     | 33     | 56    | 23      | 34      | E    | 0           | 260035.184   | -0.138                     | 497.7640  |
| 56   | 24     | 33     | 56    | 23      | 34      | A    | 0           | 260038.929   | 0.003                      | 497.7764  |
| 60   | 5      | 55     | 60    | 4       | 56      | E    | 0           | 260052.470   | 0.012                      | 422.6597  |
| 60   | 6      | 55     | 60    | 5       | 56      | E    | 0           | 260052.470   | 0.012                      | 422.6597  |
| 67   | 9      | 58     | 67    | 8       | 59      | E    | 1           | 260076.979   | 0.417                      | 670.4095  |
| 67   | 10     | 58     | 67    | 9       | 59      | E    | 1           | 260076.979   | 0.413                      | 670.4095  |
| 60   | 5      | 55     | 60    | 4       | 56      | A    | 0           | 260082.168   | 0.019                      | 422.6543  |
| 60   | 6      | 55     | 60    | 5       | 56      | A    | 0           | 260082.168   | 0.019                      | 422.6543  |
| 42   | 9      | 34     | 41    | 8       | 33      | E    | 0           | 260111.673   | -0.016                     | 262.7068  |
| 42   | 9      | 34     | 41    | 8       | 33      | A    | 0           | 260123.339   | 0.023                      | 262.7008  |
| 42   | 9      | 34     | 41    | 8       | 33      | E    | 1           | 260154.017   | 0.050                      | 391.0157  |
| 42   | 23     | 20     | 41    | 23      | 19      | A    | 0           | 260254.596   | -0.052                     | 345.1691  |
| 42   | 23     | 19     | 41    | 23      | 18      | A    | 0           | 260254.596   | -0.052                     | 345.1691  |
| 70   | 25     | 46     | 70    | 24      | 47      | E    | 0           | 260275.209   | -0.147                     | 692.6575  |
| 25   | 10     | 16     | 24    | 9       | 15      | A    | 0           | 260353.964   | -0.017                     | 144.8557  |
| 21   | 12     | 10     | 20    | 11      | 10      | E    | 0           | 260372.723   | 0.006                      | 133.5357  |
| 21   | 12     | 9      | 20    | 11      | 9       | E    | 0           | 260384.853   | -0.105                     | 133.5488  |
| 21   | 12     | 10     | 20    | 11      | 9       | A    | 0           | 260418.804   | 0.003                      | 133.5386  |
| 25   | 10     | 15     | 24    | 9       | 15      | E    | 0           | 260434.540   | -0.026                     | 144.8650  |
| 25   | 10     | 16     | 24    | 9       | 16      | E    | 0           | 260488.528   | -0.001                     | 144.8511  |
| 42   | 22     | 20     | 41    | 22      | 19      | A    | 0           | 260541.084   | -0.035                     | 336.6780  |
| 42   | 22     | 21     | 41    | 22      | 20      | A    | 0           | 260541.084   | -0.035                     | 336.6780  |
| 42   | 22     | 21     | 41    | 22      | 20      | E    | 0           | 260542.552   | 0.054                      | 336.6646  |
| 41   | 13     | 29     | 40    | 13      | 28      | A    | 0           | 260605.429   | -0.045                     | 270.0520  |
| 41   | 13     | 29     | 40    | 13      | 28      | E    | 0           | 260626.034   | 0.008                      | 270.0532  |
| 55   | 24     | 31     | 55    | 23      | 32      | E    | 0           | 260627.801   | -0.045                     | 486.0909  |
| 25   | 10     | 15     | 24    | 9       | 16      | A    | 0           | 260643.909   | 0.013                      | 144.8474  |
| 55   | 24     | 32     | 55    | 23      | 33      | E    | 0           | 260667.710   | -0.063                     | 486.0841  |
| 55   | 24     | 31     | 55    | 23      | 32      | A    | 0           | 260670.757   | -0.033                     | 486.0966  |
| 55   | 24     | 32     | 55    | 23      | 33      | A    | 0           | 260670.757   | -0.033                     | 486.0966  |
| 23   | 11     | 13     | 22    | 10      | 13      | E    | 0           | 260790.579   | 0.008                      | 138.5181  |
| 23   | 11     | 12     | 22    | 10      | 12      | E    | 0           | 260809.109   | 0.045                      | 138.5304  |
| 23   | 11     | 13     | 22    | 10      | 12      | A    | 0           | 260836.679   | -0.084                     | 138.5193  |
| 42   | 21     | 22     | 41    | 21      | 21      | A    | 0           | 260870.934   | 0.011                      | 328.5819  |
| 42   | 21     | 21     | 41    | 21      | 20      | A    | 0           | 260870.934   | 0.011                      | 328.5819  |
| 42   | 21     | 22     | 41    | 21      | 21      | E    | 0           | 260872.546   | -0.066                     | 328.5689  |
| 69   | 10     | 59     | 69    | 9       | 60      | A    | 0           | 260929.679   | -0.185                     | 577.4201  |
| 69   | 11     | 59     | 69    | 10      | 60      | A    | 0           | 260929.679   | -0.201                     | 577.4201  |
| 57   | 3      | 54     | 57    | 2       | 55      | A    | 0           | 261173.337   | 0.108                      | 372.9848  |
| 57   | 4      | 54     | 57    | 3       | 55      | A    | 0           | 261173.337   | 0.108                      | 372.9848  |
| 54   | 24     | 30     | 54    | 23      | 31      | E    | 0           | 261222.235   | -0.054                     | 474.6282  |
| 42   | 20     | 22     | 41    | 20      | 21      | A    | 0           | 261254.045   | -0.141                     | 320.8839  |
| 42   | 20     | 23     | 41    | 20      | 22      | A    | 0           | 261254.045   | -0.141                     | 320.8839  |
| 42   | 20     | 22     | 41    | 20      | 21      | E    | 0           | 261256.090   | 0.059                      | 320.8817  |
| 54   | 24     | 31     | 54    | 23      | 32      | E    | 0           | 261262.458   | -0.048                     | 474.6214  |



| $J'$ | $K'_a$ | $K'_c$ | $J''$ | $K''_a$ | $K''_c$ | Sym. | $v_{tCH_3}$ | $\nu_{Obs.}$ | $\nu_{Obs.} - \nu_{Calc.}$ | $E_{low}$ |
|------|--------|--------|-------|---------|---------|------|-------------|--------------|----------------------------|-----------|
| 54   | 24     | 30     | 54    | 23      | 31      | A    | 0           | 261264.935   | -0.037                     | 474.6341  |
| 54   | 24     | 31     | 54    | 23      | 32      | A    | 0           | 261264.935   | -0.037                     | 474.6341  |
| 41   | 13     | 28     | 40    | 13      | 27      | E    | 0           | 261274.060   | 0.060                      | 270.0851  |
| 57   | 3      | 54     | 57    | 2       | 55      | E    | 1           | 261279.038   | -0.133                     | 501.2751  |
| 57   | 4      | 54     | 57    | 3       | 55      | E    | 1           | 261279.038   | -0.133                     | 501.2751  |
| 41   | 13     | 28     | 40    | 13      | 27      | A    | 0           | 261283.136   | -0.034                     | 270.0814  |
| 41   | 11     | 31     | 40    | 11      | 30      | A    | 0           | 261402.054   | -0.014                     | 261.9555  |
| 41   | 11     | 31     | 40    | 11      | 30      | E    | 0           | 261402.054   | -0.040                     | 261.9606  |
| 54   | 1      | 53     | 54    | 0       | 54      | A    | 0           | 261505.443   | 0.169                      | 325.8087  |
| 54   | 2      | 53     | 54    | 1       | 54      | A    | 0           | 261505.443   | 0.169                      | 325.8087  |
| 62   | 6      | 56     | 62    | 5       | 57      | E    | 1           | 261680.875   | -0.059                     | 582.4715  |
| 62   | 7      | 56     | 62    | 6       | 57      | E    | 1           | 261680.875   | -0.059                     | 582.4715  |
| 62   | 6      | 56     | 62    | 5       | 57      | E    | 0           | 261688.981   | -0.032                     | 454.1921  |
| 62   | 7      | 56     | 62    | 6       | 57      | E    | 0           | 261688.981   | -0.032                     | 454.1921  |
| 42   | 19     | 24     | 41    | 19      | 23      | A    | 0           | 261704.435   | -0.013                     | 313.5881  |
| 42   | 19     | 23     | 41    | 19      | 22      | A    | 0           | 261704.435   | -0.014                     | 313.5881  |
| 42   | 19     | 23     | 41    | 19      | 22      | E    | 0           | 261706.622   | 0.199                      | 313.5874  |
| 62   | 6      | 56     | 62    | 5       | 57      | A    | 0           | 261714.883   | -0.037                     | 454.1879  |
| 62   | 7      | 56     | 62    | 6       | 57      | A    | 0           | 261714.883   | -0.037                     | 454.1879  |
| 41   | 12     | 30     | 40    | 12      | 29      | A    | 0           | 261773.042   | -0.038                     | 265.8133  |
| 41   | 12     | 30     | 40    | 12      | 29      | E    | 0           | 261778.422   | -0.016                     | 265.8171  |
| 53   | 24     | 29     | 53    | 23      | 30      | E    | 0           | 261780.975   | -0.079                     | 463.3823  |
| 53   | 24     | 30     | 53    | 23      | 31      | E    | 0           | 261821.452   | -0.088                     | 463.3755  |
| 53   | 24     | 29     | 53    | 23      | 30      | A    | 0           | 261823.468   | -0.020                     | 463.3882  |
| 53   | 24     | 30     | 53    | 23      | 31      | A    | 0           | 261823.468   | -0.020                     | 463.3882  |
| 59   | 4      | 55     | 59    | 3       | 56      | A    | 1           | 262159.576   | 0.290                      | 531.3692  |
| 59   | 5      | 55     | 59    | 4       | 56      | A    | 1           | 262159.576   | 0.290                      | 531.3692  |
| 27   | 9      | 18     | 26    | 8       | 19      | E    | 0           | 262182.286   | -0.028                     | 152.5911  |
| 27   | 9      | 18     | 26    | 8       | 19      | A    | 0           | 262193.513   | 0.006                      | 152.5834  |
| 42   | 18     | 25     | 41    | 18      | 24      | A    | 0           | 262240.310   | -0.041                     | 306.6996  |
| 42   | 18     | 24     | 41    | 18      | 23      | E    | 0           | 262242.286   | -0.171                     | 306.7005  |
| 42   | 18     | 25     | 41    | 18      | 24      | E    | 0           | 262243.399   | 0.051                      | 306.6887  |
| 52   | 24     | 28     | 52    | 23      | 29      | E    | 0           | 262305.960   | -0.069                     | 452.3525  |
| 52   | 24     | 29     | 52    | 23      | 30      | E    | 0           | 262346.771   | 0.007                      | 452.3457  |
| 52   | 24     | 28     | 52    | 23      | 29      | A    | 0           | 262348.192   | -0.034                     | 452.3586  |
| 52   | 24     | 29     | 52    | 23      | 30      | A    | 0           | 262348.192   | -0.034                     | 452.3586  |
| 68   | 25     | 43     | 68    | 24      | 44      | E    | 0           | 262661.311   | -0.048                     | 663.3982  |
| 68   | 25     | 44     | 68    | 24      | 45      | E    | 0           | 262699.304   | -0.063                     | 663.3924  |
| 68   | 25     | 43     | 68    | 24      | 44      | A    | 0           | 262705.446   | 0.242                      | 663.4034  |
| 41   | 9      | 32     | 40    | 9       | 31      | E    | 0           | 262739.410   | -0.019                     | 257.7791  |
| 41   | 9      | 32     | 40    | 9       | 31      | A    | 0           | 262753.455   | -0.023                     | 257.7720  |
| 41   | 9      | 32     | 40    | 9       | 31      | E    | 1           | 262804.193   | 0.059                      | 386.0712  |
| 51   | 24     | 28     | 51    | 23      | 29      | E    | 0           | 262839.797   | -0.156                     | 441.5317  |
| 51   | 24     | 27     | 51    | 23      | 28      | A    | 0           | 262840.973   | 0.017                      | 441.5446  |
| 51   | 24     | 28     | 51    | 23      | 29      | A    | 0           | 262840.973   | 0.017                      | 441.5446  |
| 42   | 17     | 26     | 41    | 17      | 25      | A    | 0           | 262886.473   | -0.011                     | 300.2255  |
| 42   | 17     | 26     | 41    | 17      | 25      | E    | 0           | 262890.719   | -0.047                     | 300.2281  |
| 42   | 17     | 26     | 41    | 17      | 25      | E    | 0           | 262892.100   | -0.069                     | 300.2157  |
| 64   | 7      | 57     | 64    | 6       | 58      | E    | 1           | 263062.516   | 0.071                      | 615.0688  |
| 64   | 8      | 57     | 64    | 7       | 58      | E    | 1           | 263062.516   | 0.071                      | 615.0688  |
| 45   | 6      | 39     | 44    | 7       | 38      | A    | 1           | 263093.388   | -0.024                     | 407.2659  |
| 45   | 7      | 39     | 44    | 6       | 38      | A    | 1           | 263096.074   | 0.038                      | 407.2659  |
| 46   | 5      | 41     | 45    | 5       | 40      | A    | 1           | 263116.433   | -0.030                     | 410.1875  |
| 46   | 5      | 41     | 45    | 6       | 40      | A    | 1           | 263116.433   | 0.018                      | 410.1875  |
| 46   | 6      | 41     | 45    | 5       | 40      | A    | 1           | 263116.433   | -0.054                     | 410.1875  |
| 46   | 6      | 41     | 45    | 6       | 40      | A    | 1           | 263116.433   | -0.006                     | 410.1875  |
| 64   | 7      | 57     | 64    | 6       | 58      | A    | 0           | 263140.998   | -0.106                     | 486.7921  |
| 64   | 8      | 57     | 64    | 7       | 58      | A    | 0           | 263140.998   | -0.106                     | 486.7921  |
| 47   | 4      | 43     | 46    | 4       | 42      | A    | 1           | 263205.864   | -0.063                     | 403.8446  |
| 47   | 4      | 43     | 46    | 5       | 42      | A    | 1           | 263228.190   | -0.063                     | 412.6443  |
| 47   | 5      | 43     | 46    | 4       | 42      | A    | 1           | 263228.190   | -0.062                     | 412.6443  |
| 47   | 5      | 43     | 46    | 5       | 42      | A    | 1           | 263228.190   | -0.064                     | 412.6443  |
| 44   | 8      | 37     | 43    | 8       | 36      | A    | 1           | 263230.363   | 0.069                      | 403.8446  |
| 46   | 5      | 41     | 45    | 5       | 40      | E    | 1           | 263246.343   | 0.028                      | 409.9860  |
| 46   | 5      | 41     | 45    | 6       | 40      | E    | 1           | 263246.343   | 0.087                      | 409.9860  |
| 46   | 6      | 41     | 45    | 5       | 40      | E    | 1           | 263246.343   | -0.001                     | 409.9860  |
| 46   | 6      | 41     | 45    | 6       | 40      | E    | 1           | 263246.343   | 0.057                      | 409.9860  |
| 45   | 6      | 39     | 44    | 6       | 38      | E    | 1           | 263247.524   | 0.032                      | 407.0781  |
| 45   | 7      | 39     | 44    | 6       | 38      | E    | 1           | 263248.604   | 0.028                      | 407.0781  |
| 44   | 7      | 37     | 43    | 7       | 36      | A    | 1           | 263249.832   | 0.158                      | 403.8431  |
| 44   | 8      | 37     | 43    | 7       | 36      | A    | 1           | 263274.019   | -0.023                     | 403.8431  |
| 45   | 6      | 39     | 44    | 7       | 38      | E    | 0           | 263285.996   | -0.060                     | 278.7633  |
| 45   | 7      | 39     | 44    | 7       | 38      | E    | 0           | 263287.179   | 0.116                      | 278.7633  |
| 45   | 6      | 39     | 44    | 6       | 38      | E    | 0           | 263287.811   | -0.138                     | 278.7632  |
| 40   | 11     | 29     | 39    | 11      | 28      | A    | 0           | 263291.530   | -0.083                     | 254.0710  |
| 46   | 6      | 41     | 45    | 6       | 40      | E    | 0           | 263291.530   | 0.056                      | 281.6721  |
| 45   | 6      | 39     | 44    | 6       | 38      | A    | 0           | 263292.725   | 0.072                      | 278.7574  |
| 45   | 7      | 39     | 44    | 6       | 38      | A    | 0           | 263293.735   | 0.068                      | 278.7574  |
| 46   | 5      | 41     | 45    | 5       | 40      | A    | 0           | 263295.481   | -0.023                     | 281.6658  |
| 46   | 5      | 41     | 45    | 6       | 40      | A    | 0           | 263295.481   | 0.031                      | 281.6658  |
| 46   | 6      | 41     | 45    | 5       | 40      | A    | 0           | 263295.481   | -0.050                     | 281.6658  |
| 46   | 6      | 41     | 45    | 6       | 40      | A    | 0           | 263295.481   | 0.004                      | 281.6658  |
| 43   | 8      | 35     | 42    | 9       | 34      | E    | 0           | 263315.417   | -0.010                     | 271.3832  |
| 43   | 8      | 35     | 42    | 9       | 34      | A    | 0           | 263319.468   | 0.003                      | 271.3776  |
| 47   | 4      | 43     | 46    | 4       | 42      | E    | 1           | 263337.128   | -0.026                     | 412.4231  |
| 47   | 4      | 43     | 46    | 5       | 42      | E    | 1           | 263337.128   | -0.025                     | 412.4231  |
| 47   | 5      | 43     | 46    | 4       | 42      | E    | 1           | 263337.128   | -0.027                     | 412.4231  |
| 47   | 5      | 43     | 46    | 5       | 42      | E    | 1           | 263337.128   | -0.026                     | 412.4231  |
| 47   | 4      | 43     | 46    | 4       | 42      | E    | 0           | 263386.110   | 0.014                      | 284.1118  |
| 47   | 5      | 43     | 46    | 5       | 42      | E    | 0           | 263386.110   | 0.014                      | 284.1118  |
| 47   | 4      | 43     | 46    | 4       | 42      | A    | 0           | 263389.454   | 0.005                      | 284.1049  |
| 47   | 4      | 43     | 46    | 5       | 42      | A    | 0           | 263389.454   | 0.006                      | 284.1049  |
| 47   | 5      | 43     | 46    | 4       | 42      | A    | 0           | 263389.454   | 0.004                      | 284.1049  |
| 47   | 5      | 43     | 46    | 5       | 42      | A    | 0           | 263389.454   | 0.005                      | 284.1049  |
| 48   | 3      | 45     | 47    | 3       | 44      | A    | 1           | 263391.399   | -0.051                     | 414.6597  |
| 48   | 3      | 45     | 47    | 4       | 44      | A    | 1           | 263391.399   | -0.051                     | 414.6597  |
| 48   | 4      | 45     | 47    | 3       | 44      | A    | 1           | 263391.399   | -0.051                     | 414.6597  |
| 48   | 4      | 45     | 47    | 4       | 44      | A    | 1           | 263391.399   | -0.051                     | 414.6597  |
| 44   | 8      | 37     | 43    | 8       | 36      | E    | 1           | 263408.546   | -0.040                     | 403.6641  |
| 44   | 7      | 37     | 43    | 8       | 36      | E    | 0           | 263415.904   | -0.018                     | 275.3504  |
| 44   | 7      | 37     | 43    | 8       | 36      | A    | 0           | 263421.282   | -0.006                     | 275.3448  |
| 44   | 7      | 37     | 43    | 7       | 36      | E    | 1           | 263430.746   | -0.099                     | 403.6624  |
| 44   | 8      | 37     | 43    | 8       | 36      | E    | 0           | 263442.552   | 0.022                      | 275.3504  |
| 44   | 8      | 37     | 43    | 8       | 36      | A    | 0           | 263448.039   | 0.005                      | 275.3448  |
| 44   | 8      | 37     | 43    | 7       | 36      | E    | 1           | 263459.231   | 0.004                      | 403.6624  |
| 44   | 7      | 37     | 43    | 7       | 36      | E    | 0           | 263463.472   | -0.065                     | 275.3488  |
| 44   | 7      | 37     | 43    | 7       | 36      | A    | 0           | 263469.175   | 0.035                      | 275.3432  |
| 48   | 3      | 45     | 47    | 3       | 44      | E    | 1           | 263479.036   | -0.043                     | 414.4129  |
| 48   | 3      | 45     | 47    | 4       | 44      | E    | 1           | 263479.036   | -0.043                     | 414.4129  |
| 48   | 4      | 45     | 47    | 3       | 44      | E    | 1           | 263479.036   | -0.043                     | 414.4129  |
| 48   | 4      | 45     | 47    | 4       | 44      | E    | 1           | 263479.036   | -0.043                     | 414.4129  |
| 44   | 8      | 37     | 43    | 7       | 36      | E    | 0           | 263490.253   | 0.108                      | 275.3488  |
| 44   | 8      | 37     | 43    | 7       | 36      | A    | 0           | 263495.874   | -0.013                     | 275.3432  |
| 48   | 3      | 45     | 47    | 3       | 44      | E    | 0           | 263531.572   | -0.001                     | 286.1059  |
| 48   | 4      | 45     | 47    | 4       | 44      | E    | 0           | 263531.572   | -0.001                     | 286.1059  |



| $J'$ | $K'_a$ | $K'_c$ | $J''$ | $K''_a$ | $K''_c$ | Sym. | $v_{tCH_3}$ | $\nu_{Obs.}$ | $\nu_{Obs.} - \nu_{Calc.}$ | $E_{low}$ |
|------|--------|--------|-------|---------|---------|------|-------------|--------------|----------------------------|-----------|
| 48   | 3      | 45     | 47    | 3       | 44      | A    | 0           | 263534.258   | -0.008                     | 286.0982  |
| 48   | 3      | 45     | 47    | 4       | 44      | A    | 0           | 263534.258   | -0.008                     | 286.0982  |
| 48   | 4      | 45     | 47    | 3       | 44      | A    | 0           | 263534.258   | -0.008                     | 286.0982  |
| 48   | 4      | 45     | 47    | 4       | 44      | A    | 0           | 263534.258   | -0.008                     | 286.0982  |
| 49   | 2      | 47     | 48    | 2       | 46      | A    | 1           | 263584.587   | -0.035                     | 416.2503  |
| 49   | 2      | 47     | 48    | 3       | 46      | A    | 1           | 263584.587   | -0.035                     | 416.2503  |
| 49   | 3      | 47     | 48    | 2       | 46      | A    | 1           | 263584.587   | -0.035                     | 416.2503  |
| 49   | 3      | 47     | 48    | 3       | 46      | A    | 1           | 263584.587   | -0.035                     | 416.2503  |
| 49   | 2      | 47     | 48    | 2       | 46      | E    | 1           | 263649.418   | 0.003                      | 415.9716  |
| 49   | 3      | 47     | 48    | 3       | 46      | E    | 1           | 263649.418   | 0.003                      | 415.9716  |
| 42   | 16     | 27     | 41    | 16      | 26      | A    | 0           | 263688.271   | 0.012                      | 294.1758  |
| 42   | 16     | 26     | 41    | 16      | 25      | A    | 0           | 263689.691   | -0.096                     | 294.1759  |
| 42   | 16     | 26     | 41    | 16      | 25      | E    | 0           | 263691.320   | -0.050                     | 294.1801  |
| 42   | 16     | 27     | 41    | 16      | 26      | E    | 0           | 263693.434   | -0.027                     | 294.1673  |
| 49   | 24     | 25     | 49    | 23      | 26      | E    | 0           | 263695.352   | -0.061                     | 420.5555  |
| 49   | 2      | 47     | 48    | 2       | 46      | E    | 0           | 263705.732   | 0.005                      | 287.6707  |
| 49   | 3      | 47     | 48    | 3       | 46      | E    | 0           | 263705.732   | 0.005                      | 287.6707  |
| 49   | 2      | 47     | 48    | 2       | 46      | A    | 0           | 263707.721   | 0.006                      | 287.6620  |
| 49   | 2      | 47     | 48    | 3       | 46      | A    | 0           | 263707.721   | 0.006                      | 287.6620  |
| 49   | 3      | 47     | 48    | 2       | 46      | A    | 0           | 263707.721   | 0.006                      | 287.6620  |
| 49   | 3      | 47     | 48    | 3       | 46      | A    | 0           | 263707.721   | 0.006                      | 287.6620  |
| 49   | 24     | 25     | 49    | 23      | 26      | A    | 0           | 263736.850   | -0.118                     | 420.5618  |
| 49   | 24     | 26     | 49    | 23      | 27      | A    | 0           | 263736.850   | -0.118                     | 420.5618  |
| 49   | 24     | 26     | 49    | 23      | 27      | E    | 0           | 263736.850   | 0.055                      | 420.5488  |
| 43   | 9      | 35     | 42    | 9       | 34      | E    | 1           | 263782.196   | 0.013                      | 399.6935  |
| 50   | 1      | 49     | 49    | 1       | 48      | A    | 1           | 263795.269   | 0.014                      | 417.4285  |
| 50   | 1      | 49     | 49    | 2       | 48      | A    | 1           | 263795.269   | 0.014                      | 417.4285  |
| 50   | 2      | 49     | 49    | 1       | 48      | A    | 1           | 263795.269   | 0.014                      | 417.4285  |
| 50   | 2      | 49     | 49    | 2       | 48      | A    | 1           | 263795.269   | 0.014                      | 417.4285  |
| 67   | 25     | 43     | 67    | 24      | 44      | E    | 0           | 263807.380   | -0.117                     | 649.0968  |
| 43   | 9      | 35     | 42    | 9       | 34      | E    | 0           | 263809.201   | -0.020                     | 271.3832  |
| 67   | 25     | 43     | 67    | 24      | 44      | A    | 0           | 263812.652   | -0.114                     | 649.1080  |
| 43   | 9      | 35     | 42    | 9       | 34      | A    | 0           | 263815.399   | -0.029                     | 271.3776  |
| 42   | 10     | 33     | 41    | 10      | 32      | E    | 1           | 263820.763   | -0.021                     | 395.1494  |
| 50   | 1      | 49     | 49    | 1       | 48      | E    | 1           | 263834.618   | 0.009                      | 417.1111  |
| 50   | 2      | 49     | 49    | 2       | 48      | E    | 1           | 263834.618   | 0.009                      | 417.1111  |
| 42   | 10     | 33     | 41    | 10      | 32      | E    | 0           | 263849.241   | -0.005                     | 266.8439  |
| 50   | 1      | 49     | 49    | 1       | 48      | E    | 0           | 263895.341   | -0.032                     | 288.8181  |
| 50   | 2      | 49     | 49    | 2       | 48      | E    | 0           | 263895.341   | -0.032                     | 288.8181  |
| 50   | 1      | 49     | 49    | 1       | 48      | A    | 0           | 263896.605   | 0.023                      | 288.8083  |
| 50   | 1      | 49     | 49    | 2       | 48      | A    | 0           | 263896.605   | 0.023                      | 288.8083  |
| 50   | 2      | 49     | 49    | 1       | 48      | A    | 0           | 263896.605   | 0.023                      | 288.8083  |
| 50   | 2      | 49     | 49    | 2       | 48      | A    | 0           | 263896.605   | 0.023                      | 288.8083  |
| 51   | 0      | 51     | 50    | 0       | 50      | A    | 1           | 264015.957   | 0.105                      | 418.2037  |
| 51   | 0      | 51     | 50    | 1       | 50      | A    | 1           | 264015.957   | 0.105                      | 418.2037  |
| 51   | 1      | 51     | 50    | 0       | 50      | A    | 1           | 264015.957   | 0.105                      | 418.2037  |
| 51   | 1      | 51     | 50    | 1       | 50      | A    | 1           | 264015.957   | 0.105                      | 418.2037  |
| 51   | 0      | 51     | 50    | 0       | 50      | E    | 1           | 264026.249   | 0.081                      | 417.8402  |
| 51   | 1      | 51     | 50    | 1       | 50      | E    | 1           | 264026.249   | 0.081                      | 417.8402  |
| 51   | 0      | 51     | 50    | 0       | 50      | A    | 0           | 264092.522   | -0.165                     | 289.5459  |
| 51   | 0      | 51     | 50    | 1       | 50      | A    | 0           | 264092.522   | -0.165                     | 289.5459  |
| 51   | 1      | 51     | 50    | 0       | 50      | A    | 0           | 264092.522   | -0.165                     | 289.5459  |
| 51   | 1      | 51     | 50    | 1       | 50      | A    | 0           | 264092.522   | -0.165                     | 289.5459  |
| 51   | 0      | 51     | 50    | 0       | 50      | E    | 0           | 264092.522   | 0.161                      | 289.5571  |
| 51   | 1      | 51     | 50    | 1       | 50      | E    | 0           | 264092.522   | 0.161                      | 289.5571  |
| 48   | 24     | 24     | 48    | 23      | 25      | E    | 0           | 264101.908   | -0.031                     | 410.3857  |
| 16   | 15     | 1      | 15    | 14      | 1       | E    | 0           | 264127.470   | -0.051                     | 129.2544  |
| 16   | 15     | 2      | 15    | 14      | 2       | E    | 0           | 264132.313   | 0.029                      | 129.2406  |
| 43   | 8      | 35     | 42    | 8       | 34      | E    | 1           | 264133.851   | -0.173                     | 399.6644  |
| 48   | 24     | 24     | 48    | 23      | 25      | A    | 0           | 264143.338   | 0.037                      | 410.3921  |
| 48   | 24     | 25     | 48    | 23      | 26      | A    | 0           | 264143.338   | 0.037                      | 410.3921  |
| 48   | 24     | 25     | 48    | 23      | 26      | E    | 0           | 264143.338   | -0.167                     | 410.3790  |
| 43   | 8      | 35     | 42    | 8       | 34      | E    | 0           | 264144.953   | -0.079                     | 271.3555  |
| 43   | 8      | 35     | 42    | 8       | 34      | A    | 0           | 264152.542   | -0.008                     | 271.3498  |
| 16   | 15     | 2      | 15    | 14      | 1       | A    | 0           | 264170.853   | 0.001                      | 129.2480  |
| 16   | 15     | 1      | 15    | 14      | 2       | A    | 0           | 264170.853   | 0.001                      | 129.2480  |
| 66   | 8      | 58     | 66    | 7       | 59      | E    | 1           | 264228.626   | 0.240                      | 648.7290  |
| 66   | 9      | 58     | 66    | 8       | 59      | E    | 1           | 264228.626   | 0.239                      | 648.7290  |
| 47   | 24     | 23     | 47    | 23      | 24      | E    | 0           | 264482.530   | -0.040                     | 400.4297  |
| 47   | 24     | 23     | 47    | 23      | 24      | A    | 0           | 264523.855   | 0.105                      | 400.4362  |
| 47   | 24     | 24     | 47    | 23      | 25      | A    | 0           | 264523.855   | 0.105                      | 400.4362  |
| 47   | 24     | 24     | 47    | 23      | 25      | E    | 0           | 264523.855   | -0.452                     | 400.4230  |
| 43   | 9      | 35     | 42    | 8       | 34      | E    | 0           | 264638.806   | -0.020                     | 271.3555  |
| 43   | 9      | 35     | 42    | 8       | 34      | A    | 0           | 264648.507   | -0.006                     | 271.3498  |
| 43   | 9      | 35     | 42    | 8       | 34      | E    | 1           | 264655.415   | -0.011                     | 399.6644  |
| 42   | 15     | 28     | 41    | 15      | 27      | A    | 0           | 264697.710   | -0.078                     | 288.5650  |
| 42   | 15     | 27     | 41    | 15      | 26      | E    | 0           | 264709.513   | -0.031                     | 288.5711  |
| 42   | 15     | 28     | 41    | 15      | 27      | E    | 0           | 264711.413   | -0.020                     | 288.5583  |
| 42   | 15     | 27     | 41    | 15      | 26      | A    | 0           | 264715.126   | -0.065                     | 288.5656  |
| 66   | 25     | 41     | 66    | 24      | 42      | E    | 0           | 264813.237   | -0.047                     | 635.0304  |
| 46   | 24     | 22     | 46    | 23      | 23      | E    | 0           | 264838.653   | 0.017                      | 390.6872  |
| 66   | 25     | 42     | 66    | 24      | 43      | E    | 0           | 264852.207   | -0.131                     | 635.0246  |
| 66   | 25     | 41     | 66    | 24      | 42      | A    | 0           | 264856.468   | 0.047                      | 635.0360  |
| 46   | 24     | 22     | 46    | 23      | 23      | A    | 0           | 264879.566   | -0.077                     | 390.6938  |
| 46   | 24     | 23     | 46    | 23      | 24      | A    | 0           | 264879.566   | -0.077                     | 390.6938  |
| 46   | 24     | 23     | 46    | 23      | 24      | E    | 0           | 264880.664   | 0.134                      | 390.6805  |
| 44   | 10     | 34     | 43    | 11      | 33      | A    | 0           | 264942.720   | -0.062                     | 288.7080  |
| 58   | 3      | 55     | 58    | 2       | 56      | A    | 1           | 264961.977   | -0.396                     | 511.8653  |
| 58   | 4      | 55     | 58    | 3       | 56      | A    | 1           | 264961.977   | -0.396                     | 511.8653  |
| 44   | 10     | 34     | 43    | 11      | 33      | E    | 0           | 264981.383   | -0.028                     | 288.7130  |
| 61   | 5      | 56     | 61    | 4       | 57      | E    | 0           | 265022.087   | -0.003                     | 433.8375  |
| 18   | 14     | 4      | 17    | 13      | 5       | A    | 0           | 265025.530   | -0.011                     | 130.8870  |
| 18   | 14     | 5      | 17    | 13      | 4       | A    | 0           | 265025.530   | -0.011                     | 130.8870  |
| 61   | 5      | 56     | 61    | 4       | 57      | A    | 0           | 265052.222   | -0.011                     | 433.8322  |
| 61   | 6      | 56     | 61    | 5       | 57      | A    | 0           | 265052.222   | -0.011                     | 433.8322  |
| 68   | 9      | 59     | 68    | 8       | 60      | E    | 1           | 265167.687   | 0.541                      | 683.4464  |
| 68   | 10     | 59     | 68    | 9       | 60      | E    | 1           | 265167.687   | 0.538                      | 683.4464  |
| 45   | 24     | 21     | 45    | 23      | 22      | E    | 0           | 265171.344   | -0.056                     | 381.1577  |
| 45   | 24     | 21     | 45    | 23      | 22      | A    | 0           | 265212.190   | -0.054                     | 381.1643  |
| 45   | 24     | 22     | 45    | 23      | 23      | A    | 0           | 265212.190   | -0.054                     | 381.1643  |
| 45   | 24     | 22     | 45    | 23      | 23      | E    | 0           | 265213.457   | 0.019                      | 381.1510  |
| 43   | 30     | 13     | 42    | 30      | 12      | A    | 0           | 265228.921   | -0.056                     | 424.1586  |
| 43   | 30     | 14     | 42    | 30      | 13      | A    | 0           | 265228.921   | -0.056                     | 424.1586  |
| 43   | 30     | 13     | 42    | 30      | 12      | E    | 0           | 265228.921   | -0.086                     | 424.1494  |
| 40   | 10     | 30     | 39    | 10      | 29      | E    | 0           | 265283.051   | -0.016                     | 251.6034  |
| 40   | 10     | 30     | 39    | 10      | 29      | A    | 0           | 265285.862   | -0.060                     | 251.5954  |
| 43   | 9      | 34     | 42    | 10      | 33      | A    | 0           | 265287.121   | -0.012                     | 275.6395  |
| 43   | 9      | 34     | 42    | 10      | 33      | E    | 0           | 265295.666   | 0.045                      | 275.6450  |
| 68   | 9      | 59     | 68    | 8       | 60      | A    | 0           | 265331.479   | -0.201                     | 555.1892  |
| 68   | 10     | 59     | 68    | 9       | 60      | A    | 0           | 265331.479   | -0.203                     | 555.1892  |
| 41   | 12     | 29     | 40    | 12      | 28      | A    | 0           | 265367.340   | -0.110                     | 266.0160  |
| 43   | 29     | 15     | 42    | 29      | 14      | A    | 0           | 265367.340   | -0.021                     | 412.9519  |
| 43   | 29     | 14     | 42    | 29      | 13      | A    | 0           | 265367.340   | -0.021                     | 412.9519  |
| 43   | 29     | 14     | 42    | 29      | 13      | E    | 0           | 265367.340   | -0.154                     | 412.9416  |
| 41   | 12     | 29     | 40    | 12      | 28      | E    | 0           | 265377.367   | 0.021                      | 266.0206  |
| 44   | 24     | 20     | 44    | 23      | 21      | E    | 0           | 265482.001   | -0.061                     | 371.8409  |



| $J'$ | $K'_a$ | $K'_c$ | $J''$ | $K''_a$ | $K''_c$ | Sym. | $v_{tCH_3}$ | $\nu_{Obs.}$ | $\nu_{Obs.} - \nu_{Calc.}$ | $E_{low}$ |
|------|--------|--------|-------|---------|---------|------|-------------|--------------|----------------------------|-----------|
| 44   | 24     | 20     | 44    | 23      | 21      | A    | 0           | 265522.739   | -0.012                     | 371.8475  |
| 44   | 24     | 21     | 44    | 23      | 22      | A    | 0           | 265522.739   | -0.012                     | 371.8475  |
| 44   | 24     | 21     | 44    | 23      | 22      | E    | 0           | 265524.200   | -0.033                     | 371.8342  |
| 43   | 27     | 17     | 42    | 27      | 16      | A    | 0           | 265689.025   | -0.049                     | 391.6971  |
| 43   | 27     | 16     | 42    | 27      | 15      | A    | 0           | 265689.025   | -0.049                     | 391.6971  |
| 43   | 24     | 19     | 43    | 23      | 20      | E    | 0           | 265771.747   | -0.017                     | 362.7362  |
| 20   | 13     | 8      | 19    | 12      | 8       | E    | 0           | 265783.275   | 0.020                      | 133.7544  |
| 20   | 13     | 7      | 19    | 12      | 7       | E    | 0           | 265789.729   | -0.048                     | 133.7678  |
| 43   | 24     | 19     | 43    | 23      | 20      | A    | 0           | 265812.268   | -0.040                     | 362.7430  |
| 43   | 24     | 20     | 43    | 23      | 21      | A    | 0           | 265812.268   | -0.040                     | 362.7430  |
| 43   | 24     | 20     | 43    | 23      | 21      | E    | 0           | 265814.068   | 0.009                      | 362.7296  |
| 20   | 13     | 8      | 19    | 12      | 7       | A    | 0           | 265827.339   | 0.000                      | 133.7588  |
| 20   | 13     | 7      | 19    | 12      | 8       | A    | 0           | 265827.339   | 0.000                      | 133.7588  |
| 65   | 25     | 41     | 65    | 24      | 42      | E    | 0           | 265837.725   | -0.117                     | 621.1752  |
| 65   | 25     | 40     | 65    | 24      | 41      | A    | 0           | 265841.079   | 0.021                      | 621.1867  |
| 26   | 10     | 17     | 25    | 9       | 16      | A    | 0           | 265849.221   | -0.090                     | 150.1164  |
| 70   | 10     | 60     | 70    | 9       | 61      | E    | 1           | 265865.858   | 0.702                      | 719.2152  |
| 70   | 11     | 60     | 70    | 10      | 61      | E    | 1           | 265865.858   | 0.693                      | 719.2152  |
| 43   | 26     | 17     | 42    | 26      | 16      | A    | 0           | 265877.428   | -0.002                     | 381.6507  |
| 43   | 26     | 18     | 42    | 26      | 17      | A    | 0           | 265877.428   | -0.002                     | 381.6507  |
| 42   | 14     | 29     | 41    | 14      | 28      | A    | 0           | 265978.590   | -0.019                     | 283.4139  |
| 26   | 10     | 16     | 25    | 9       | 16      | E    | 0           | 265990.060   | -0.062                     | 150.1247  |
| 42   | 14     | 29     | 41    | 14      | 28      | E    | 0           | 266019.446   | 0.002                      | 283.4109  |
| 42   | 24     | 18     | 42    | 23      | 19      | A    | 0           | 266081.955   | -0.049                     | 353.8503  |
| 42   | 24     | 19     | 42    | 23      | 20      | A    | 0           | 266081.955   | -0.049                     | 353.8503  |
| 42   | 24     | 19     | 42    | 23      | 20      | E    | 0           | 266084.010   | 0.006                      | 353.8369  |
| 43   | 25     | 19     | 42    | 25      | 18      | A    | 0           | 266088.359   | -0.043                     | 371.9932  |
| 43   | 25     | 18     | 42    | 25      | 17      | A    | 0           | 266088.359   | -0.043                     | 371.9932  |
| 58   | 3      | 55     | 58    | 2       | 56      | A    | 0           | 266114.737   | 0.129                      | 383.3200  |
| 58   | 4      | 55     | 58    | 3       | 56      | A    | 0           | 266114.737   | 0.129                      | 383.3200  |
| 42   | 14     | 28     | 41    | 14      | 27      | A    | 0           | 266138.518   | -0.099                     | 283.4200  |
| 26   | 10     | 17     | 25    | 9       | 17      | E    | 0           | 266220.956   | -0.077                     | 150.1047  |
| 43   | 24     | 19     | 42    | 24      | 18      | A    | 0           | 266326.019   | -0.122                     | 362.7258  |
| 43   | 24     | 20     | 42    | 24      | 19      | A    | 0           | 266326.019   | -0.122                     | 362.7258  |
| 41   | 24     | 17     | 41    | 23      | 18      | A    | 0           | 266332.827   | -0.053                     | 345.1691  |
| 41   | 24     | 18     | 41    | 23      | 19      | A    | 0           | 266332.827   | -0.053                     | 345.1691  |
| 41   | 24     | 18     | 41    | 23      | 19      | E    | 0           | 266335.119   | 0.007                      | 345.1557  |
| 26   | 10     | 16     | 25    | 9       | 17      | A    | 0           | 266437.278   | 0.054                      | 150.0998  |
| 22   | 12     | 11     | 21    | 11      | 11      | E    | 0           | 266438.787   | -0.012                     | 137.8832  |
| 22   | 12     | 10     | 21    | 11      | 10      | E    | 0           | 266451.181   | -0.051                     | 137.8962  |
| 22   | 12     | 10     | 21    | 11      | 11      | A    | 0           | 266485.037   | -0.005                     | 137.8860  |
| 40   | 24     | 16     | 40    | 23      | 17      | E    | 0           | 266525.776   | -0.001                     | 336.6923  |
| 40   | 24     | 16     | 40    | 23      | 17      | A    | 0           | 266565.858   | -0.071                     | 336.6991  |
| 40   | 24     | 17     | 40    | 23      | 18      | A    | 0           | 266565.858   | -0.071                     | 336.6991  |
| 40   | 24     | 17     | 40    | 23      | 18      | E    | 0           | 266568.403   | 0.027                      | 336.6856  |
| 26   | 10     | 16     | 25    | 9       | 17      | E    | 0           | 266589.850   | -0.054                     | 150.1047  |
| 43   | 23     | 21     | 42    | 23      | 20      | A    | 0           | 266595.804   | -0.035                     | 353.8503  |
| 43   | 23     | 20     | 42    | 23      | 19      | A    | 0           | 266595.804   | -0.035                     | 353.8503  |
| 43   | 23     | 21     | 42    | 23      | 20      | E    | 0           | 266597.157   | 0.106                      | 353.8369  |
| 63   | 6      | 57     | 63    | 5       | 58      | E    | 1           | 266669.441   | -0.174                     | 594.1541  |
| 63   | 7      | 57     | 63    | 6       | 58      | E    | 1           | 266669.441   | -0.174                     | 594.1541  |
| 63   | 6      | 57     | 63    | 5       | 58      | A    | 0           | 266705.592   | 0.003                      | 465.8733  |
| 63   | 7      | 57     | 63    | 6       | 58      | A    | 0           | 266705.592   | 0.003                      | 465.8733  |
| 64   | 25     | 39     | 64    | 24      | 40      | E    | 0           | 266727.595   | -0.044                     | 607.5534  |
| 24   | 11     | 14     | 23    | 10      | 14      | E    | 0           | 266736.218   | 0.024                      | 143.3080  |
| 39   | 24     | 15     | 39    | 23      | 16      | E    | 0           | 266742.016   | -0.050                     | 328.4331  |
| 24   | 11     | 13     | 23    | 10      | 13      | E    | 0           | 266754.965   | -0.085                     | 143.3203  |
| 64   | 25     | 39     | 64    | 24      | 40      | A    | 0           | 266769.994   | 0.007                      | 607.5594  |
| 24   | 11     | 14     | 23    | 10      | 13      | A    | 0           | 266779.975   | -0.048                     | 143.3092  |
| 39   | 24     | 15     | 39    | 23      | 16      | A    | 0           | 266782.059   | -0.043                     | 328.4400  |
| 39   | 24     | 16     | 39    | 23      | 17      | A    | 0           | 266782.059   | -0.043                     | 328.4400  |
| 39   | 24     | 16     | 39    | 23      | 17      | E    | 0           | 266784.789   | 0.041                      | 328.4265  |
| 24   | 11     | 13     | 23    | 10      | 14      | A    | 0           | 266788.908   | 0.072                      | 143.3089  |
| 43   | 22     | 21     | 42    | 22      | 20      | A    | 0           | 266904.038   | -0.026                     | 345.3687  |
| 43   | 22     | 22     | 42    | 22      | 21      | A    | 0           | 266904.038   | -0.026                     | 345.3687  |
| 43   | 22     | 22     | 42    | 22      | 21      | E    | 0           | 266905.645   | 0.079                      | 345.3554  |
| 42   | 9      | 33     | 41    | 9       | 32      | E    | 0           | 266925.313   | -0.020                     | 266.5431  |
| 42   | 9      | 33     | 41    | 9       | 32      | A    | 0           | 266938.576   | -0.035                     | 266.5365  |
| 38   | 24     | 14     | 38    | 23      | 15      | E    | 0           | 266942.337   | -0.045                     | 320.3844  |
| 38   | 24     | 14     | 38    | 23      | 15      | A    | 0           | 266982.263   | -0.046                     | 320.3914  |
| 38   | 24     | 15     | 38    | 23      | 16      | A    | 0           | 266982.263   | -0.046                     | 320.3914  |
| 38   | 24     | 15     | 38    | 23      | 16      | E    | 0           | 266985.215   | 0.075                      | 320.3778  |
| 37   | 24     | 13     | 37    | 23      | 14      | E    | 0           | 267127.590   | -0.008                     | 312.5459  |
| 37   | 24     | 13     | 37    | 23      | 14      | A    | 0           | 267167.365   | -0.057                     | 312.5529  |
| 37   | 24     | 14     | 37    | 23      | 15      | A    | 0           | 267167.365   | -0.057                     | 312.5529  |
| 37   | 24     | 14     | 37    | 23      | 15      | E    | 0           | 267170.436   | 0.012                      | 312.5393  |
| 43   | 21     | 23     | 42    | 21      | 22      | A    | 0           | 267259.309   | 0.025                      | 337.2836  |
| 43   | 21     | 22     | 42    | 21      | 21      | A    | 0           | 267259.309   | 0.025                      | 337.2836  |
| 43   | 21     | 23     | 42    | 21      | 22      | E    | 0           | 267261.090   | -0.030                     | 337.2706  |
| 36   | 24     | 12     | 36    | 23      | 13      | E    | 0           | 267298.532   | -0.019                     | 304.9173  |
| 36   | 24     | 12     | 36    | 23      | 13      | A    | 0           | 267338.221   | -0.058                     | 304.9244  |
| 36   | 24     | 13     | 36    | 23      | 14      | A    | 0           | 267338.221   | -0.058                     | 304.9244  |
| 36   | 24     | 13     | 36    | 23      | 14      | E    | 0           | 267341.472   | 0.034                      | 304.9107  |
| 42   | 11     | 32     | 41    | 11      | 31      | E    | 0           | 267399.055   | -0.040                     | 270.6800  |
| 42   | 11     | 32     | 41    | 11      | 31      | A    | 0           | 267400.293   | 0.006                      | 270.6749  |
| 42   | 13     | 30     | 41    | 13      | 29      | A    | 0           | 267441.027   | -0.045                     | 278.7449  |
| 42   | 13     | 30     | 41    | 13      | 29      | E    | 0           | 267454.733   | 0.035                      | 278.7467  |
| 35   | 24     | 11     | 35    | 23      | 12      | E    | 0           | 267456.038   | -0.006                     | 297.4983  |
| 35   | 24     | 11     | 35    | 23      | 12      | A    | 0           | 267495.658   | -0.024                     | 297.5054  |
| 35   | 24     | 12     | 35    | 23      | 13      | A    | 0           | 267495.658   | -0.024                     | 297.5054  |
| 35   | 24     | 12     | 35    | 23      | 13      | E    | 0           | 267498.997   | 0.012                      | 297.4918  |
| 34   | 24     | 10     | 34    | 23      | 11      | E    | 0           | 267600.837   | -0.011                     | 290.2887  |
| 63   | 25     | 38     | 63    | 24      | 39      | E    | 0           | 267604.519   | -0.023                     | 594.1471  |
| 34   | 24     | 10     | 34    | 23      | 11      | A    | 0           | 267640.355   | -0.047                     | 290.2957  |
| 34   | 24     | 11     | 34    | 23      | 12      | A    | 0           | 267640.355   | -0.047                     | 290.2957  |
| 34   | 24     | 11     | 34    | 23      | 12      | E    | 0           | 267643.844   | 0.007                      | 290.2821  |
| 63   | 25     | 39     | 63    | 24      | 40      | E    | 0           | 267645.020   | 0.098                      | 594.1414  |
| 63   | 25     | 38     | 63    | 24      | 39      | A    | 0           | 267646.480   | -0.024                     | 594.1532  |
| 43   | 20     | 23     | 42    | 20      | 22      | A    | 0           | 267672.581   | -0.034                     | 329.5985  |
| 43   | 20     | 24     | 42    | 20      | 23      | A    | 0           | 267672.581   | -0.034                     | 329.5985  |
| 43   | 20     | 24     | 42    | 20      | 23      | E    | 0           | 267674.821   | -0.020                     | 329.5860  |
| 33   | 24     | 9      | 33    | 23      | 10      | E    | 0           | 267733.773   | 0.070                      | 283.2880  |
| 33   | 24     | 9      | 33    | 23      | 10      | A    | 0           | 267773.175   | -0.002                     | 283.2951  |
| 33   | 24     | 10     | 33    | 23      | 11      | A    | 0           | 267773.175   | -0.002                     | 283.2951  |
| 33   | 24     | 10     | 33    | 23      | 11      | E    | 0           | 267776.784   | 0.050                      | 283.2815  |
| 32   | 24     | 8      | 32    | 23      | 9       | E    | 0           | 267855.329   | 0.008                      | 276.4961  |
| 32   | 24     | 8      | 32    | 23      | 9       | A    | 0           | 267894.672   | -0.049                     | 276.5033  |
| 32   | 24     | 9      | 32    | 23      | 10      | A    | 0           | 267894.672   | -0.049                     | 276.5033  |
| 32   | 24     | 9      | 32    | 23      | 10      | E    | 0           | 267898.446   | 0.057                      | 276.4896  |
| 31   | 24     | 7      | 31    | 23      | 8       | E    | 0           | 267966.422   | 0.038                      | 269.9128  |
| 31   | 24     | 7      | 31    | 23      | 8       | A    | 0           | 268005.626   | -0.089                     | 269.9199  |
| 31   | 24     | 8      | 31    | 23      | 9       | A    | 0           | 268005.626   | -0.089                     | 269.9199  |
| 31   | 24     | 8      | 31    | 23      | 9       | E    | 0           | 268009.554   | 0.070                      | 269.9062  |
| 30   | 24     | 6      | 30    | 23      | 7       | E    | 0           | 268067.569   | 0.020                      | 263.5376  |
| 65   | 7      | 58     | 65    | 6       | 59      | E    | 1           | 268076.259   | 0.042                      | 627.2590  |
| 65   | 8      | 58     | 65    | 7       | 59      | E    | 1           | 268076.259   | 0.042                      | 627.2590  |



| $J'$ | $K'_a$ | $K'_c$ | $J''$ | $K''_a$ | $K''_c$ | Sym. | $v_{tCH_3}$ | $\nu_{Obs.}$ | $\nu_{Obs.} - \nu_{Calc.}$ | $E_{low}$ |
|------|--------|--------|-------|---------|---------|------|-------------|--------------|----------------------------|-----------|
| 30   | 24     | 6      | 30    | 23      | 7       | A    | 0           | 268106.772   | -0.043                     | 263.5448  |
| 30   | 24     | 7      | 30    | 23      | 8       | A    | 0           | 268106.772   | -0.043                     | 263.5448  |
| 30   | 24     | 7      | 30    | 23      | 8       | E    | 0           | 268110.684   | 0.008                      | 263.5311  |
| 60   | 4      | 56     | 60    | 3       | 57      | E    | 0           | 268123.652   | -0.021                     | 413.7160  |
| 60   | 5      | 56     | 60    | 4       | 57      | E    | 0           | 268123.652   | -0.021                     | 413.7160  |
| 65   | 7      | 58     | 65    | 6       | 59      | A    | 0           | 268157.250   | -0.181                     | 498.9853  |
| 65   | 8      | 58     | 65    | 7       | 59      | A    | 0           | 268157.250   | -0.181                     | 498.9853  |
| 43   | 19     | 25     | 42    | 19      | 24      | A    | 0           | 268159.162   | 0.146                      | 322.3176  |
| 43   | 19     | 24     | 42    | 19      | 23      | A    | 0           | 268159.162   | 0.145                      | 322.3176  |
| 29   | 24     | 5      | 29    | 23      | 6       | E    | 0           | 268159.162   | -0.286                     | 257.3705  |
| 43   | 19     | 25     | 42    | 19      | 24      | E    | 0           | 268161.475   | -0.230                     | 322.3059  |
| 46   | 6      | 40     | 45    | 7       | 39      | A    | 1           | 268195.630   | 0.036                      | 416.0418  |
| 46   | 7      | 40     | 45    | 6       | 39      | A    | 1           | 268196.946   | -0.038                     | 416.0418  |
| 29   | 24     | 5      | 29    | 23      | 6       | A    | 0           | 268198.616   | -0.037                     | 257.3777  |
| 29   | 24     | 6      | 29    | 23      | 7       | A    | 0           | 268198.616   | -0.037                     | 257.3777  |
| 60   | 4      | 56     | 60    | 3       | 57      | E    | 1           | 268215.377   | -0.158                     | 541.9960  |
| 60   | 5      | 56     | 60    | 4       | 57      | E    | 1           | 268215.377   | -0.158                     | 541.9960  |
| 47   | 5      | 42     | 46    | 5       | 41      | A    | 1           | 268231.303   | -0.040                     | 418.9641  |
| 47   | 5      | 42     | 46    | 6       | 41      | A    | 1           | 268231.303   | -0.016                     | 418.9641  |
| 47   | 6      | 42     | 46    | 5       | 41      | A    | 1           | 268231.303   | -0.052                     | 418.9641  |
| 47   | 6      | 42     | 46    | 6       | 41      | A    | 1           | 268231.303   | -0.028                     | 418.9641  |
| 28   | 24     | 4      | 28    | 23      | 5       | E    | 0           | 268242.631   | -0.053                     | 251.4112  |
| 28   | 24     | 4      | 28    | 23      | 5       | A    | 0           | 268281.831   | -0.004                     | 251.4184  |
| 28   | 24     | 5      | 28    | 23      | 6       | A    | 0           | 268281.831   | -0.004                     | 251.4184  |
| 28   | 24     | 5      | 28    | 23      | 6       | E    | 0           | 268285.969   | 0.115                      | 251.4047  |
| 45   | 7      | 38     | 44    | 8       | 37      | A    | 1           | 268292.790   | -0.001                     | 412.6250  |
| 45   | 8      | 38     | 44    | 8       | 37      | A    | 1           | 268306.308   | 0.057                      | 412.6250  |
| 45   | 8      | 38     | 44    | 7       | 37      | A    | 1           | 268330.656   | 0.038                      | 412.6242  |
| 46   | 6      | 40     | 45    | 7       | 39      | E    | 1           | 268345.711   | 0.001                      | 415.8591  |
| 46   | 7      | 40     | 45    | 6       | 39      | E    | 1           | 268347.383   | 0.011                      | 415.8591  |
| 48   | 4      | 44     | 47    | 4       | 43      | A    | 1           | 268349.274   | -0.071                     | 421.4246  |
| 48   | 4      | 44     | 47    | 5       | 43      | A    | 1           | 268349.274   | -0.070                     | 421.4246  |
| 48   | 5      | 44     | 47    | 4       | 43      | A    | 1           | 268349.274   | -0.071                     | 421.4246  |
| 48   | 5      | 44     | 47    | 5       | 43      | A    | 1           | 268349.274   | -0.070                     | 421.4246  |
| 47   | 5      | 42     | 46    | 5       | 41      | E    | 1           | 268359.911   | -0.043                     | 418.7669  |
| 47   | 5      | 42     | 46    | 6       | 41      | E    | 1           | 268359.911   | -0.013                     | 418.7669  |
| 47   | 6      | 42     | 46    | 5       | 41      | E    | 1           | 268359.911   | -0.058                     | 418.7669  |
| 47   | 6      | 42     | 46    | 6       | 41      | E    | 1           | 268359.911   | -0.028                     | 418.7669  |
| 44   | 8      | 36     | 43    | 9       | 35      | A    | 1           | 268367.188   | 0.079                      | 408.6655  |
| 42   | 12     | 31     | 41    | 12      | 30      | A    | 0           | 268381.209   | -0.064                     | 274.5451  |
| 42   | 12     | 31     | 41    | 12      | 30      | E    | 0           | 268385.240   | 0.031                      | 274.5491  |
| 46   | 6      | 40     | 45    | 7       | 39      | A    | 0           | 268393.263   | 0.025                      | 287.5399  |
| 46   | 7      | 40     | 45    | 6       | 39      | A    | 0           | 268394.744   | -0.045                     | 287.5399  |
| 47   | 5      | 42     | 46    | 5       | 41      | E    | 0           | 268407.120   | -0.021                     | 290.4545  |
| 47   | 6      | 42     | 46    | 6       | 41      | E    | 0           | 268407.120   | -0.007                     | 290.4545  |
| 47   | 5      | 42     | 46    | 5       | 41      | A    | 0           | 268411.086   | -0.020                     | 290.4483  |
| 47   | 5      | 42     | 46    | 6       | 41      | A    | 0           | 268411.086   | 0.008                      | 290.4483  |
| 47   | 6      | 42     | 46    | 5       | 41      | A    | 0           | 268411.086   | -0.034                     | 290.4483  |
| 47   | 6      | 42     | 46    | 6       | 41      | A    | 0           | 268411.086   | -0.006                     | 290.4483  |
| 48   | 4      | 44     | 47    | 4       | 43      | E    | 1           | 268457.465   | -0.031                     | 421.2071  |
| 48   | 4      | 44     | 47    | 5       | 43      | E    | 1           | 268457.465   | -0.031                     | 421.2071  |
| 48   | 5      | 44     | 47    | 4       | 43      | E    | 1           | 268457.465   | -0.032                     | 421.2071  |
| 48   | 5      | 44     | 47    | 5       | 43      | E    | 1           | 268457.465   | -0.031                     | 421.2071  |
| 45   | 7      | 38     | 44    | 8       | 37      | E    | 1           | 268465.691   | -0.053                     | 412.4505  |
| 45   | 8      | 38     | 44    | 8       | 37      | E    | 1           | 268481.554   | 0.034                      | 412.4505  |
| 45   | 7      | 38     | 44    | 7       | 37      | E    | 1           | 268494.169   | 0.043                      | 412.4495  |
| 45   | 7      | 38     | 44    | 8       | 37      | E    | 0           | 268503.485   | -0.007                     | 284.1379  |
| 48   | 4      | 44     | 47    | 4       | 43      | E    | 0           | 268508.281   | 0.061                      | 292.8974  |
| 48   | 5      | 44     | 47    | 5       | 43      | E    | 0           | 268508.281   | 0.061                      | 292.8974  |
| 48   | 4      | 44     | 47    | 4       | 43      | A    | 0           | 268511.559   | 0.009                      | 292.8906  |
| 48   | 4      | 44     | 47    | 5       | 43      | A    | 0           | 268511.559   | 0.010                      | 292.8906  |
| 48   | 5      | 44     | 47    | 4       | 43      | A    | 0           | 268511.559   | 0.009                      | 292.8906  |
| 48   | 5      | 44     | 47    | 5       | 43      | A    | 0           | 268511.559   | 0.009                      | 292.8906  |
| 49   | 3      | 46     | 48    | 3       | 45      | A    | 1           | 268515.362   | -0.039                     | 423.4455  |
| 49   | 3      | 46     | 48    | 4       | 45      | A    | 1           | 268515.362   | -0.039                     | 423.4455  |
| 49   | 4      | 46     | 48    | 3       | 45      | A    | 1           | 268515.362   | -0.039                     | 423.4455  |
| 49   | 4      | 46     | 48    | 4       | 45      | A    | 1           | 268515.362   | -0.039                     | 423.4455  |
| 45   | 8      | 38     | 44    | 8       | 37      | E    | 0           | 268518.288   | 0.049                      | 284.1379  |
| 45   | 8      | 38     | 44    | 8       | 37      | A    | 0           | 268523.594   | -0.060                     | 284.1324  |
| 45   | 7      | 38     | 44    | 7       | 37      | E    | 0           | 268530.318   | 0.217                      | 284.1370  |
| 45   | 7      | 38     | 44    | 7       | 37      | A    | 0           | 268535.555   | -0.019                     | 284.1315  |
| 45   | 8      | 38     | 44    | 7       | 37      | E    | 0           | 268544.828   | -0.019                     | 284.1370  |
| 45   | 8      | 38     | 44    | 7       | 37      | A    | 0           | 268550.384   | -0.016                     | 284.1315  |
| 44   | 8      | 36     | 43    | 9       | 35      | E    | 0           | 268577.010   | 0.014                      | 280.1829  |
| 44   | 8      | 36     | 43    | 9       | 35      | A    | 0           | 268581.838   | -0.028                     | 280.1775  |
| 49   | 3      | 46     | 48    | 3       | 45      | E    | 1           | 268602.582   | -0.023                     | 423.2016  |
| 49   | 3      | 46     | 48    | 4       | 45      | E    | 1           | 268602.582   | -0.023                     | 423.2016  |
| 49   | 4      | 46     | 48    | 3       | 45      | E    | 1           | 268602.582   | -0.023                     | 423.2016  |
| 49   | 4      | 46     | 48    | 4       | 45      | E    | 1           | 268602.582   | -0.023                     | 423.2016  |
| 49   | 3      | 46     | 48    | 3       | 45      | E    | 0           | 268656.720   | -0.004                     | 294.8964  |
| 49   | 4      | 46     | 48    | 4       | 45      | E    | 0           | 268656.720   | -0.004                     | 294.8964  |
| 49   | 3      | 46     | 48    | 3       | 45      | A    | 0           | 268659.395   | -0.010                     | 294.8888  |
| 49   | 3      | 46     | 48    | 4       | 45      | A    | 0           | 268659.395   | -0.010                     | 294.8888  |
| 49   | 4      | 46     | 48    | 3       | 45      | A    | 0           | 268659.395   | -0.010                     | 294.8888  |
| 49   | 4      | 46     | 48    | 4       | 45      | A    | 0           | 268659.395   | -0.010                     | 294.8888  |
| 50   | 2      | 48     | 49    | 2       | 47      | A    | 1           | 268709.847   | 0.018                      | 425.0425  |
| 50   | 2      | 48     | 49    | 3       | 47      | A    | 1           | 268709.847   | 0.018                      | 425.0425  |
| 50   | 3      | 48     | 49    | 2       | 47      | A    | 1           | 268709.847   | 0.018                      | 425.0425  |
| 50   | 3      | 48     | 49    | 3       | 47      | A    | 1           | 268709.847   | 0.018                      | 425.0425  |
| 43   | 18     | 26     | 42    | 18      | 25      | A    | 0           | 268739.187   | -0.040                     | 315.4470  |
| 50   | 2      | 48     | 49    | 2       | 47      | E    | 1           | 268774.421   | 0.015                      | 424.7660  |
| 50   | 3      | 48     | 49    | 3       | 47      | E    | 1           | 268774.421   | 0.015                      | 424.7660  |
| 44   | 8      | 36     | 43    | 8       | 35      | A    | 1           | 268825.957   | 0.163                      | 408.6502  |
| 50   | 2      | 48     | 49    | 2       | 47      | E    | 0           | 268832.240   | 0.015                      | 296.4670  |
| 50   | 3      | 48     | 49    | 3       | 47      | E    | 0           | 268832.240   | 0.015                      | 296.4670  |
| 50   | 2      | 48     | 49    | 2       | 47      | A    | 0           | 268834.223   | 0.017                      | 296.4584  |
| 50   | 2      | 48     | 49    | 3       | 47      | A    | 0           | 268834.223   | 0.017                      | 296.4584  |
| 50   | 3      | 48     | 49    | 2       | 47      | A    | 0           | 268834.223   | 0.017                      | 296.4584  |
| 50   | 3      | 48     | 49    | 3       | 47      | A    | 0           | 268834.223   | 0.017                      | 296.4584  |
| 44   | 9      | 36     | 43    | 9       | 35      | E    | 1           | 268837.923   | -0.017                     | 408.4924  |
| 44   | 9      | 36     | 43    | 9       | 35      | E    | 0           | 268867.165   | -0.054                     | 280.1829  |
| 44   | 9      | 36     | 43    | 9       | 35      | A    | 0           | 268873.368   | -0.053                     | 280.1775  |
| 51   | 1      | 50     | 50    | 1       | 49      | A    | 1           | 268921.028   | 0.040                      | 426.2277  |
| 51   | 1      | 50     | 50    | 2       | 49      | A    | 1           | 268921.028   | 0.040                      | 426.2277  |
| 51   | 2      | 50     | 50    | 1       | 49      | A    | 1           | 268921.028   | 0.040                      | 426.2277  |
| 51   | 2      | 50     | 50    | 2       | 49      | A    | 1           | 268921.028   | 0.040                      | 426.2277  |
| 51   | 1      | 50     | 50    | 1       | 49      | E    | 1           | 268960.246   | 0.007                      | 425.9117  |
| 51   | 2      | 50     | 50    | 2       | 49      | E    | 1           | 268960.246   | 0.007                      | 425.9117  |
| 51   | 1      | 50     | 50    | 1       | 49      | E    | 0           | 269022.395   | -0.026                     | 297.6207  |
| 51   | 2      | 50     | 50    | 2       | 49      | E    | 0           | 269022.395   | -0.026                     | 297.6207  |
| 51   | 1      | 50     | 50    | 1       | 49      | A    | 0           | 269023.650   | 0.024                      | 297.6109  |
| 51   | 1      | 50     | 50    | 2       | 49      | A    | 0           | 269023.650   | 0.024                      | 297.6109  |
| 51   | 2      | 50     | 50    | 1       | 49      | A    | 0           | 269023.650   | 0.024                      | 297.6109  |
| 51   | 2      | 50     | 50    | 2       | 49      | A    | 0           | 269023.650   | 0.024                      | 297.6109  |
| 44   | 8      | 36     | 43    | 8       | 35      | E    | 1           | 269052.029   | 0.071                      | 408.4750  |
| 44   | 8      | 36     | 43    | 8       | 35      | E    | 0           | 269070.743   | -0.048                     | 280.1665  |



| $J'$ | $K'_a$ | $K'_c$ | $J''$ | $K''_a$ | $K''_c$ | Sym. | $v_{tCH_3}$ | $\nu_{Obs.}$ | $\nu_{Obs.} - \nu_{Calc.}$ | $E_{low}$ |
|------|--------|--------|-------|---------|---------|------|-------------|--------------|----------------------------|-----------|
| 43   | 10     | 34     | 42    | 10      | 33      | E    | 1           | 269082.751   | -0.006                     | 403.9496  |
| 44   | 9      | 36     | 43    | 8       | 35      | A    | 1           | 269094.684   | 0.171                      | 408.6502  |
| 52   | 0      | 52     | 51    | 0       | 51      | A    | 1           | 269141.891   | 0.045                      | 427.0103  |
| 52   | 0      | 52     | 51    | 1       | 51      | A    | 1           | 269141.891   | 0.045                      | 427.0103  |
| 52   | 1      | 52     | 51    | 0       | 51      | A    | 1           | 269141.891   | 0.045                      | 427.0103  |
| 52   | 1      | 52     | 51    | 1       | 51      | A    | 1           | 269141.891   | 0.045                      | 427.0103  |
| 52   | 0      | 52     | 51    | 0       | 51      | E    | 1           | 269152.103   | 0.030                      | 426.6472  |
| 52   | 1      | 52     | 51    | 1       | 51      | E    | 1           | 269152.103   | 0.030                      | 426.6472  |
| 61   | 25     | 36     | 61    | 24      | 37      | E    | 0           | 269212.856   | -0.070                     | 567.9955  |
| 52   | 0      | 52     | 51    | 0       | 51      | A    | 0           | 269219.779   | -0.167                     | 298.3550  |
| 52   | 0      | 52     | 51    | 1       | 51      | A    | 0           | 269219.779   | -0.167                     | 298.3550  |
| 52   | 1      | 52     | 51    | 0       | 51      | A    | 0           | 269219.779   | -0.167                     | 298.3550  |
| 52   | 1      | 52     | 51    | 1       | 51      | A    | 0           | 269219.779   | -0.167                     | 298.3550  |
| 52   | 0      | 52     | 51    | 0       | 51      | E    | 0           | 269219.779   | 0.156                      | 298.3663  |
| 52   | 1      | 52     | 51    | 1       | 51      | E    | 0           | 269219.779   | 0.156                      | 298.3663  |
| 61   | 25     | 37     | 61    | 24      | 38      | A    | 0           | 269254.091   | -0.072                     | 568.0019  |
| 61   | 25     | 36     | 61    | 24      | 37      | A    | 0           | 269254.091   | -0.068                     | 568.0019  |
| 61   | 25     | 37     | 61    | 24      | 38      | E    | 0           | 269254.091   | 0.042                      | 567.9898  |
| 67   | 8      | 59     | 67    | 7       | 60      | E    | 1           | 269273.285   | 0.237                      | 661.4275  |
| 67   | 9      | 59     | 67    | 8       | 60      | E    | 1           | 269273.285   | 0.237                      | 661.4275  |
| 44   | 9      | 36     | 43    | 8       | 35      | E    | 1           | 269359.389   | 0.046                      | 408.4750  |
| 44   | 9      | 36     | 43    | 8       | 35      | E    | 0           | 269360.992   | -0.021                     | 280.1665  |
| 44   | 9      | 36     | 43    | 8       | 35      | A    | 0           | 269369.378   | -0.006                     | 280.1610  |
| 43   | 17     | 27     | 42    | 17      | 26      | A    | 0           | 269443.212   | 0.100                      | 308.9945  |
| 43   | 17     | 26     | 42    | 17      | 25      | E    | 0           | 269445.613   | -0.010                     | 308.9972  |
| 43   | 17     | 27     | 42    | 17      | 26      | E    | 0           | 269447.019   | -0.154                     | 308.9848  |
| 28   | 9      | 19     | 27    | 8       | 20      | E    | 0           | 269790.239   | -0.014                     | 158.3012  |
| 60   | 25     | 35     | 60    | 24      | 36      | E    | 0           | 269949.681   | -0.079                     | 555.2489  |
| 62   | 5      | 57     | 62    | 4       | 58      | A    | 0           | 270020.082   | -0.009                     | 445.1810  |
| 62   | 5      | 57     | 62    | 5       | 58      | A    | 0           | 270020.082   | -0.009                     | 445.1810  |
| 62   | 5      | 57     | 62    | 4       | 58      | E    | 1           | 270028.894   | -0.184                     | 573.4643  |
| 62   | 6      | 57     | 62    | 5       | 58      | E    | 1           | 270028.894   | -0.184                     | 573.4643  |
| 69   | 9      | 60     | 69    | 8       | 61      | E    | 1           | 270249.663   | 0.462                      | 696.6538  |
| 69   | 10     | 60     | 69    | 9       | 61      | E    | 1           | 270249.663   | 0.461                      | 696.6538  |
| 17   | 15     | 3      | 16    | 14      | 3       | E    | 0           | 270278.494   | 0.038                      | 132.5263  |
| 43   | 16     | 28     | 42    | 16      | 27      | A    | 0           | 270315.182   | 0.017                      | 302.9715  |
| 17   | 15     | 3      | 16    | 14      | 2       | A    | 0           | 270317.020   | -0.018                     | 132.5336  |
| 17   | 15     | 2      | 16    | 14      | 3       | A    | 0           | 270317.020   | -0.018                     | 132.5336  |
| 43   | 16     | 27     | 42    | 16      | 26      | A    | 0           | 270318.278   | -0.012                     | 302.9716  |
| 43   | 16     | 27     | 42    | 16      | 26      | E    | 0           | 270319.326   | 0.061                      | 302.9758  |
| 43   | 16     | 28     | 42    | 16      | 27      | E    | 0           | 270321.571   | 0.026                      | 302.9632  |
| 69   | 9      | 60     | 69    | 8       | 61      | A    | 0           | 270416.803   | -0.157                     | 568.4000  |
| 69   | 9      | 60     | 69    | 9       | 61      | A    | 0           | 270416.803   | -0.158                     | 568.4000  |
| 59   | 25     | 34     | 59    | 24      | 35      | E    | 0           | 270644.816   | -0.114                     | 542.7209  |
| 41   | 10     | 31     | 40    | 10      | 30      | E    | 0           | 270959.947   | -0.022                     | 260.4522  |
| 41   | 10     | 31     | 40    | 10      | 30      | A    | 0           | 270967.101   | 0.006                      | 260.4444  |
| 59   | 3      | 56     | 59    | 2       | 57      | A    | 0           | 271055.179   | 0.114                      | 393.8262  |
| 59   | 4      | 56     | 59    | 3       | 57      | A    | 0           | 271055.179   | 0.114                      | 393.8262  |
| 27   | 10     | 18     | 26    | 9       | 17      | A    | 0           | 271100.146   | -0.004                     | 155.6059  |
| 44   | 33     | 12     | 43    | 33      | 11      | A    | 0           | 271111.440   | -0.139                     | 468.9244  |
| 44   | 33     | 11     | 43    | 33      | 10      | A    | 0           | 271111.440   | -0.139                     | 468.9244  |
| 44   | 33     | 11     | 43    | 33      | 10      | E    | 0           | 271111.440   | 0.048                      | 468.9192  |
| 19   | 14     | 6      | 18    | 13      | 6       | E    | 0           | 271119.976   | -0.090                     | 134.5852  |
| 19   | 14     | 5      | 18    | 13      | 5       | E    | 0           | 271120.992   | 0.049                      | 134.5989  |
| 19   | 14     | 5      | 18    | 13      | 6       | A    | 0           | 271161.662   | -0.000                     | 134.5911  |
| 19   | 14     | 6      | 18    | 13      | 5       | A    | 0           | 271161.662   | -0.000                     | 134.5911  |
| 44   | 32     | 12     | 43    | 32      | 11      | A    | 0           | 271224.656   | -0.055                     | 456.5667  |
| 44   | 32     | 13     | 43    | 32      | 12      | A    | 0           | 271224.656   | -0.055                     | 456.5667  |
| 44   | 32     | 12     | 43    | 32      | 11      | E    | 0           | 271224.656   | 0.070                      | 456.5601  |
| 43   | 9      | 34     | 42    | 9       | 33      | E    | 0           | 271237.510   | 0.086                      | 275.4468  |
| 41   | 11     | 30     | 40    | 11      | 29      | A    | 0           | 271242.490   | 0.065                      | 262.8535  |
| 43   | 9      | 34     | 42    | 9       | 33      | A    | 0           | 271249.482   | 0.008                      | 275.4406  |
| 41   | 11     | 30     | 40    | 11      | 29      | E    | 0           | 271251.236   | -0.028                     | 262.8603  |
| 58   | 25     | 33     | 58    | 24      | 34      | E    | 0           | 271300.623   | -0.031                     | 530.4110  |
| 27   | 10     | 17     | 26    | 9       | 17      | E    | 0           | 271325.510   | -0.069                     | 155.6135  |
| 58   | 25     | 33     | 58    | 24      | 34      | A    | 0           | 271340.900   | -0.008                     | 530.4178  |
| 58   | 25     | 34     | 58    | 24      | 35      | E    | 0           | 271342.623   | -0.096                     | 530.4055  |
| 44   | 31     | 14     | 43    | 31      | 13      | A    | 0           | 271347.852   | -0.088                     | 444.5936  |
| 44   | 31     | 13     | 43    | 31      | 12      | A    | 0           | 271347.852   | -0.088                     | 444.5936  |
| 44   | 31     | 13     | 43    | 31      | 12      | E    | 0           | 271347.852   | -0.042                     | 444.5857  |
| 43   | 15     | 29     | 42    | 15      | 28      | A    | 0           | 271418.811   | -0.020                     | 297.3944  |
| 43   | 15     | 29     | 42    | 15      | 28      | E    | 0           | 271439.195   | -0.066                     | 297.3881  |
| 43   | 15     | 28     | 42    | 15      | 27      | E    | 0           | 271440.411   | 0.050                      | 297.4009  |
| 43   | 15     | 28     | 42    | 15      | 27      | A    | 0           | 271452.055   | -0.016                     | 297.3956  |
| 44   | 30     | 14     | 43    | 30      | 13      | E    | 0           | 271482.673   | -0.087                     | 432.9965  |
| 44   | 29     | 16     | 43    | 29      | 15      | A    | 0           | 271630.728   | -0.015                     | 421.8036  |
| 44   | 29     | 15     | 43    | 29      | 14      | A    | 0           | 271630.728   | -0.015                     | 421.8036  |
| 44   | 29     | 15     | 43    | 29      | 14      | E    | 0           | 271630.728   | -0.173                     | 421.7933  |
| 64   | 6      | 58     | 64    | 5       | 59      | A    | 0           | 271693.036   | -0.048                     | 477.7294  |
| 64   | 7      | 58     | 64    | 6       | 59      | A    | 0           | 271693.036   | -0.048                     | 477.7294  |
| 41   | 10     | 32     | 40    | 9       | 31      | E    | 0           | 271757.281   | -0.038                     | 257.7791  |
| 41   | 10     | 32     | 40    | 9       | 31      | A    | 0           | 271800.161   | 0.002                      | 257.7720  |
| 40   | 10     | 31     | 39    | 9       | 30      | E    | 0           | 271858.941   | -0.053                     | 249.1539  |
| 44   | 9      | 35     | 43    | 10      | 34      | A    | 0           | 271888.030   | -0.028                     | 284.6163  |
| 44   | 9      | 35     | 43    | 10      | 34      | E    | 0           | 271891.506   | 0.094                      | 284.6216  |
| 21   | 13     | 9      | 20    | 12      | 9       | E    | 0           | 271891.506   | -0.070                     | 137.8823  |
| 21   | 13     | 8      | 20    | 12      | 8       | E    | 0           | 271898.160   | -0.049                     | 137.8957  |
| 40   | 10     | 31     | 39    | 9       | 30      | A    | 0           | 271911.463   | 0.024                      | 249.1463  |
| 57   | 25     | 32     | 57    | 24      | 33      | E    | 0           | 271918.926   | -0.073                     | 518.3187  |
| 21   | 13     | 9      | 20    | 12      | 8       | A    | 0           | 271935.722   | -0.006                     | 137.8867  |
| 27   | 10     | 18     | 26    | 9       | 18      | E    | 0           | 271943.685   | 0.018                      | 155.5796  |
| 57   | 25     | 33     | 57    | 24      | 34      | A    | 0           | 271958.927   | -0.029                     | 518.3256  |
| 57   | 25     | 32     | 57    | 24      | 33      | A    | 0           | 271958.927   | -0.029                     | 518.3256  |
| 57   | 25     | 33     | 57    | 24      | 34      | E    | 0           | 271961.296   | -0.040                     | 518.3131  |
| 44   | 27     | 18     | 43    | 27      | 17      | A    | 0           | 271975.218   | 0.062                      | 400.5595  |
| 44   | 27     | 17     | 43    | 27      | 16      | A    | 0           | 271975.218   | 0.062                      | 400.5595  |
| 61   | 4      | 57     | 61    | 3       | 58      | A    | 1           | 272027.926   | 0.276                      | 553.2133  |
| 61   | 5      | 57     | 61    | 4       | 58      | A    | 1           | 272027.926   | 0.276                      | 553.2133  |
| 27   | 10     | 17     | 26    | 9       | 18      | A    | 0           | 272245.269   | -0.005                     | 155.5738  |
| 27   | 10     | 17     | 26    | 9       | 18      | E    | 0           | 272342.946   | 0.001                      | 155.5796  |
| 44   | 25     | 20     | 43    | 25      | 19      | A    | 0           | 272403.067   | -0.084                     | 380.8690  |
| 44   | 25     | 19     | 43    | 25      | 18      | A    | 0           | 272403.067   | -0.084                     | 380.8690  |
| 23   | 12     | 12     | 22    | 11      | 12      | E    | 0           | 272483.184   | 0.005                      | 142.4434  |
| 23   | 12     | 11     | 22    | 11      | 11      | E    | 0           | 272495.773   | -0.069                     | 142.4564  |
| 56   | 25     | 31     | 56    | 24      | 32      | E    | 0           | 272501.849   | -0.051                     | 506.4433  |
| 23   | 12     | 11     | 22    | 11      | 12      | A    | 0           | 272529.558   | -0.069                     | 142.4461  |
| 56   | 25     | 32     | 56    | 24      | 33      | A    | 0           | 272541.550   | -0.024                     | 506.4504  |
| 56   | 25     | 31     | 56    | 24      | 32      | A    | 0           | 272541.550   | -0.024                     | 506.4504  |
| 56   | 25     | 32     | 56    | 24      | 33      | E    | 0           | 272544.480   | -0.011                     | 506.4378  |
| 25   | 11     | 15     | 24    | 10      | 15      | E    | 0           | 272636.488   | -0.050                     | 148.3149  |
| 25   | 11     | 14     | 24    | 10      | 14      | E    | 0           | 272655.512   | -0.025                     | 148.3271  |
| 44   | 24     | 20     | 43    | 24      | 19      | A    | 0           | 272658.133   | -0.068                     | 371.6095  |
| 44   | 24     | 21     | 43    | 24      | 20      | A    | 0           | 272658.133   | -0.068                     | 371.6095  |
| 25   | 11     | 15     | 24    | 10      | 14      | A    | 0           | 272674.502   | -0.027                     | 148.3161  |
| 25   | 11     | 14     | 24    | 10      | 15      | A    | 0           | 272695.439   | 0.049                      | 148.3155  |
| 43   | 14     | 30     | 42    | 14      | 29      | A    | 0           | 272801.649   | 0.032                      | 292.2859  |



| $J'$ | $K'_a$ | $K'_c$ | $J''$ | $K''_a$ | $K''_c$ | Sym. | $v_{tCH_3}$ | $\nu_{Obs.}$ | $\nu_{Obs.} - \nu_{Calc.}$ | $E_{low}$ |
|------|--------|--------|-------|---------|---------|------|-------------|--------------|----------------------------|-----------|
| 43   | 14     | 30     | 42    | 14      | 29      | E    | 0           | 272838.100   | -0.035                     | 292.2843  |
| 42   | 10     | 33     | 41    | 9       | 32      | E    | 0           | 272867.130   | -0.006                     | 266.5431  |
| 42   | 10     | 33     | 41    | 9       | 32      | A    | 0           | 272900.950   | -0.003                     | 266.5365  |
| 44   | 23     | 22     | 43    | 23      | 21      | A    | 0           | 272947.683   | -0.075                     | 362.7430  |
| 44   | 23     | 21     | 43    | 23      | 20      | A    | 0           | 272947.683   | -0.075                     | 362.7430  |
| 55   | 25     | 30     | 55    | 24      | 31      | E    | 0           | 273051.127   | -0.040                     | 494.7845  |
| 43   | 14     | 29     | 42    | 14      | 28      | E    | 0           | 273059.102   | 0.061                      | 292.3013  |
| 43   | 14     | 29     | 42    | 14      | 28      | A    | 0           | 273084.844   | 0.064                      | 292.2974  |
| 55   | 25     | 31     | 55    | 24      | 32      | A    | 0           | 273090.532   | -0.040                     | 494.7917  |
| 55   | 25     | 30     | 55    | 24      | 31      | A    | 0           | 273090.532   | -0.040                     | 494.7917  |
| 55   | 25     | 31     | 55    | 24      | 32      | E    | 0           | 273093.901   | -0.094                     | 494.7790  |
| 61   | 4      | 57     | 61    | 3       | 58      | A    | 0           | 273109.503   | 0.039                      | 424.7223  |
| 61   | 5      | 57     | 61    | 4       | 58      | A    | 0           | 273109.503   | 0.039                      | 424.7223  |
| 39   | 10     | 30     | 38    | 9       | 29      | E    | 0           | 273157.686   | -0.020                     | 240.6724  |
| 66   | 7      | 59     | 66    | 6       | 60      | A    | 0           | 273169.287   | -0.095                     | 511.3491  |
| 66   | 8      | 59     | 66    | 7       | 60      | A    | 0           | 273169.287   | -0.095                     | 511.3491  |
| 43   | 11     | 33     | 42    | 11      | 32      | E    | 0           | 273216.015   | -0.029                     | 279.5995  |
| 44   | 22     | 22     | 43    | 22      | 21      | A    | 0           | 273278.949   | -0.034                     | 354.2716  |
| 44   | 22     | 23     | 43    | 22      | 22      | A    | 0           | 273278.949   | -0.034                     | 354.2716  |
| 44   | 22     | 22     | 43    | 22      | 21      | E    | 0           | 273280.721   | -0.093                     | 354.2663  |
| 47   | 6      | 41     | 46    | 6       | 40      | A    | 1           | 273299.993   | -0.112                     | 424.9879  |
| 47   | 6      | 41     | 46    | 7       | 40      | A    | 1           | 273299.993   | 0.367                      | 424.9879  |
| 47   | 7      | 41     | 46    | 6       | 40      | A    | 1           | 273299.993   | -0.364                     | 424.9879  |
| 47   | 7      | 41     | 46    | 7       | 40      | A    | 1           | 273299.993   | 0.116                      | 424.9879  |
| 48   | 5      | 43     | 47    | 5       | 42      | A    | 1           | 273346.929   | -0.043                     | 427.9113  |
| 48   | 5      | 43     | 47    | 6       | 42      | A    | 1           | 273346.929   | -0.031                     | 427.9113  |
| 48   | 6      | 43     | 47    | 5       | 42      | A    | 1           | 273346.929   | -0.050                     | 427.9113  |
| 48   | 6      | 43     | 47    | 6       | 42      | A    | 1           | 273346.929   | -0.037                     | 427.9113  |
| 46   | 7      | 39     | 45    | 8       | 38      | A    | 1           | 273378.870   | -0.060                     | 421.5748  |
| 46   | 8      | 39     | 45    | 8       | 38      | A    | 1           | 273386.327   | 0.020                      | 421.5748  |
| 46   | 7      | 39     | 45    | 7       | 38      | A    | 1           | 273392.418   | 0.028                      | 421.5743  |
| 46   | 8      | 39     | 45    | 7       | 38      | A    | 1           | 273399.811   | 0.043                      | 421.5743  |
| 47   | 6      | 41     | 46    | 7       | 40      | E    | 1           | 273447.884   | 0.030                      | 424.8102  |
| 47   | 7      | 41     | 46    | 6       | 40      | E    | 1           | 273448.713   | -0.021                     | 424.8101  |
| 49   | 4      | 45     | 48    | 4       | 44      | A    | 1           | 273470.561   | -0.062                     | 430.3758  |
| 49   | 4      | 45     | 48    | 5       | 44      | A    | 1           | 273470.561   | -0.061                     | 430.3758  |
| 49   | 5      | 45     | 48    | 4       | 44      | A    | 1           | 273470.561   | -0.062                     | 430.3758  |
| 49   | 5      | 45     | 48    | 5       | 44      | A    | 1           | 273470.561   | -0.061                     | 430.3758  |
| 48   | 5      | 43     | 47    | 5       | 42      | E    | 1           | 273474.360   | -0.020                     | 427.7185  |
| 48   | 5      | 43     | 47    | 6       | 42      | E    | 1           | 273474.360   | -0.005                     | 427.7185  |
| 48   | 6      | 43     | 47    | 5       | 42      | E    | 1           | 273474.360   | -0.028                     | 427.7185  |
| 48   | 6      | 43     | 47    | 6       | 42      | E    | 1           | 273474.360   | -0.013                     | 427.7185  |
| 47   | 6      | 41     | 46    | 6       | 40      | E    | 0           | 273493.434   | -0.133                     | 296.4981  |
| 47   | 7      | 41     | 46    | 7       | 40      | E    | 0           | 273493.434   | 0.120                      | 296.4981  |
| 47   | 6      | 41     | 46    | 6       | 40      | A    | 0           | 273497.958   | -0.189                     | 296.4925  |
| 47   | 6      | 41     | 46    | 7       | 40      | A    | 0           | 273497.958   | 0.348                      | 296.4925  |
| 47   | 7      | 41     | 46    | 6       | 40      | A    | 0           | 273497.958   | -0.472                     | 296.4925  |
| 47   | 7      | 41     | 46    | 7       | 40      | A    | 0           | 273497.958   | 0.065                      | 296.4925  |
| 48   | 5      | 43     | 47    | 5       | 42      | E    | 0           | 273523.540   | -0.018                     | 299.4076  |
| 48   | 6      | 43     | 47    | 6       | 42      | E    | 0           | 273523.540   | -0.011                     | 299.4076  |
| 48   | 5      | 43     | 47    | 5       | 42      | A    | 0           | 273527.479   | -0.008                     | 299.4016  |
| 48   | 5      | 43     | 47    | 6       | 42      | A    | 0           | 273527.479   | 0.006                      | 299.4016  |
| 48   | 6      | 43     | 47    | 5       | 42      | A    | 0           | 273527.479   | -0.015                     | 299.4016  |
| 48   | 6      | 43     | 47    | 6       | 42      | A    | 0           | 273527.479   | -0.001                     | 299.4016  |
| 45   | 8      | 37     | 44    | 9       | 36      | A    | 1           | 273532.398   | 0.087                      | 417.6262  |
| 42   | 12     | 30     | 41    | 12      | 29      | E    | 0           | 273535.485   | -0.155                     | 274.8726  |
| 46   | 7      | 39     | 45    | 8       | 38      | E    | 1           | 273549.874   | -0.019                     | 421.4061  |
| 46   | 8      | 39     | 45    | 8       | 38      | E    | 1           | 273558.586   | -0.007                     | 421.4061  |
| 54   | 25     | 29     | 54    | 24      | 30      | E    | 0           | 273568.531   | 0.027                      | 483.3417  |
| 46   | 8      | 39     | 45    | 7       | 38      | E    | 1           | 273574.371   | 0.002                      | 421.4055  |
| 49   | 4      | 45     | 48    | 4       | 44      | E    | 1           | 273578.012   | -0.030                     | 430.1619  |
| 49   | 4      | 45     | 48    | 5       | 44      | E    | 1           | 273578.012   | -0.030                     | 430.1619  |
| 49   | 5      | 45     | 48    | 4       | 44      | E    | 1           | 273578.012   | -0.030                     | 430.1619  |
| 49   | 5      | 45     | 48    | 5       | 44      | E    | 1           | 273578.012   | -0.030                     | 430.1619  |
| 46   | 7      | 39     | 45    | 8       | 38      | E    | 0           | 273589.945   | -0.018                     | 293.0947  |
| 46   | 7      | 39     | 45    | 8       | 38      | A    | 0           | 273595.241   | -0.001                     | 293.0894  |
| 46   | 8      | 39     | 45    | 8       | 38      | E    | 0           | 273598.082   | 0.008                      | 293.0947  |
| 46   | 8      | 39     | 45    | 8       | 38      | A    | 0           | 273603.386   | -0.012                     | 293.0894  |
| 46   | 7      | 39     | 45    | 7       | 38      | E    | 0           | 273604.705   | -0.006                     | 293.0942  |
| 54   | 25     | 30     | 54    | 24      | 31      | A    | 0           | 273607.629   | -0.024                     | 483.3489  |
| 54   | 25     | 29     | 54    | 24      | 30      | A    | 0           | 273607.629   | -0.024                     | 483.3489  |
| 46   | 7      | 39     | 45    | 7       | 38      | A    | 0           | 273610.063   | -0.006                     | 293.0889  |
| 54   | 25     | 30     | 54    | 24      | 31      | E    | 0           | 273611.466   | -0.087                     | 483.3362  |
| 46   | 8      | 39     | 45    | 7       | 38      | E    | 0           | 273612.807   | -0.014                     | 293.0942  |
| 46   | 8      | 39     | 45    | 7       | 38      | A    | 0           | 273618.183   | -0.042                     | 293.0889  |
| 49   | 4      | 45     | 48    | 4       | 44      | E    | 0           | 273630.537   | -0.009                     | 301.8539  |
| 49   | 5      | 45     | 48    | 5       | 44      | E    | 0           | 273630.537   | -0.009                     | 301.8539  |
| 49   | 4      | 45     | 48    | 4       | 44      | A    | 0           | 273633.847   | -0.007                     | 301.8472  |
| 49   | 4      | 45     | 48    | 5       | 44      | A    | 0           | 273633.847   | -0.006                     | 301.8472  |
| 49   | 5      | 45     | 48    | 4       | 44      | A    | 0           | 273633.847   | -0.007                     | 301.8472  |
| 49   | 5      | 45     | 48    | 5       | 44      | A    | 0           | 273633.847   | -0.006                     | 301.8472  |
| 50   | 3      | 47     | 49    | 3       | 46      | A    | 1           | 273639.245   | -0.067                     | 432.4022  |
| 50   | 3      | 47     | 49    | 4       | 46      | A    | 1           | 273639.245   | -0.067                     | 432.4022  |
| 50   | 4      | 47     | 49    | 3       | 46      | A    | 1           | 273639.245   | -0.067                     | 432.4022  |
| 50   | 4      | 47     | 49    | 4       | 46      | A    | 1           | 273639.245   | -0.067                     | 432.4022  |
| 44   | 21     | 24     | 43    | 21      | 23      | A    | 0           | 273661.056   | -0.075                     | 346.1984  |
| 44   | 21     | 23     | 43    | 21      | 22      | A    | 0           | 273661.056   | -0.075                     | 346.1984  |
| 44   | 21     | 24     | 43    | 21      | 23      | E    | 0           | 273663.097   | -0.024                     | 346.1855  |
| 45   | 9      | 37     | 44    | 9       | 36      | A    | 1           | 273688.164   | 0.203                      | 417.6262  |
| 45   | 8      | 37     | 44    | 9       | 36      | E    | 1           | 273708.500   | -0.006                     | 417.4598  |
| 50   | 3      | 47     | 49    | 3       | 46      | E    | 1           | 273726.064   | -0.036                     | 432.1612  |
| 50   | 3      | 47     | 49    | 4       | 46      | E    | 1           | 273726.064   | -0.036                     | 432.1612  |
| 50   | 4      | 47     | 49    | 3       | 46      | E    | 1           | 273726.064   | -0.036                     | 432.1612  |
| 50   | 4      | 47     | 49    | 4       | 46      | E    | 1           | 273726.064   | -0.036                     | 432.1612  |
| 45   | 8      | 37     | 44    | 9       | 36      | E    | 0           | 273750.950   | 0.036                      | 289.1514  |
| 45   | 8      | 37     | 44    | 9       | 36      | A    | 0           | 273756.257   | 0.000                      | 289.1462  |
| 50   | 3      | 47     | 49    | 3       | 46      | E    | 0           | 273781.844   | -0.002                     | 303.8578  |
| 50   | 4      | 47     | 49    | 4       | 46      | E    | 0           | 273781.844   | -0.002                     | 303.8578  |
| 50   | 3      | 47     | 49    | 3       | 46      | A    | 0           | 273784.511   | -0.001                     | 303.8503  |
| 50   | 3      | 47     | 49    | 4       | 46      | A    | 0           | 273784.511   | -0.001                     | 303.8503  |
| 50   | 4      | 47     | 49    | 3       | 46      | A    | 0           | 273784.511   | -0.001                     | 303.8503  |
| 50   | 4      | 47     | 49    | 4       | 46      | A    | 0           | 273784.511   | -0.001                     | 303.8503  |
| 45   | 8      | 37     | 44    | 8       | 36      | A    | 1           | 273801.178   | 0.148                      | 417.6172  |
| 51   | 2      | 49     | 50    | 2       | 48      | A    | 1           | 273834.865   | -0.046                     | 434.0057  |
| 51   | 2      | 49     | 50    | 3       | 48      | A    | 1           | 273834.865   | -0.046                     | 434.0057  |
| 51   | 3      | 49     | 50    | 2       | 48      | A    | 1           | 273834.865   | -0.046                     | 434.0057  |
| 51   | 3      | 49     | 50    | 3       | 48      | A    | 1           | 273834.865   | -0.046                     | 434.0057  |
| 45   | 9      | 37     | 44    | 9       | 36      | E    | 1           | 273887.675   | 0.018                      | 417.4598  |
| 51   | 2      | 49     | 50    | 2       | 48      | E    | 1           | 273899.280   | 0.001                      | 433.7314  |
| 51   | 3      | 49     | 50    | 3       | 48      | E    | 1           | 273899.280   | 0.001                      | 433.7314  |
| 45   | 9      | 37     | 44    | 9       | 36      | A    | 0           | 273925.688   | -0.018                     | 289.1462  |
| 51   | 2      | 49     | 50    | 2       | 48      | E    | 0           | 273958.608   | 0.004                      | 305.4343  |
| 51   | 3      | 49     | 50    | 3       | 48      | E    | 0           | 273958.608   | 0.004                      | 305.4343  |
| 51   | 2      | 49     | 50    | 2       | 48      | A    | 0           | 273960.593   | 0.014                      | 305.4257  |
| 51   | 2      | 49     | 50    | 3       | 48      | A    | 0           | 273960.593   | 0.014                      | 305.4257  |
| 51   | 3      | 49     | 50    | 2       | 48      | A    | 0           | 273960.593   | 0.014                      | 305.4257  |



| $J'$ | $K'_a$ | $K'_c$ | $J''$ | $K''_a$ | $K''_c$ | Sym. | $v_{tCH_3}$ | $\nu_{Obs.}$ | $\nu_{Obs.} - \nu_{Calc.}$ | $E_{low}$ |
|------|--------|--------|-------|---------|---------|------|-------------|--------------|----------------------------|-----------|
| 51   | 3      | 49     | 50    | 3       | 48      | A    | 0           | 273960.593   | 0.014                      | 305.4257  |
| 45   | 8      | 37     | 44    | 8       | 36      | E    | 1           | 274015.837   | -0.055                     | 417.4496  |
| 45   | 8      | 37     | 44    | 8       | 36      | E    | 1           | 274015.837   | -0.055                     | 417.4496  |
| 52   | 1      | 51     | 51    | 1       | 50      | A    | 1           | 274046.574   | 0.002                      | 435.1980  |
| 52   | 1      | 51     | 51    | 2       | 50      | A    | 1           | 274046.574   | 0.002                      | 435.1980  |
| 52   | 2      | 51     | 51    | 1       | 50      | A    | 1           | 274046.574   | 0.002                      | 435.1980  |
| 52   | 2      | 51     | 51    | 2       | 50      | A    | 1           | 274046.574   | 0.002                      | 435.1980  |
| 53   | 25     | 28     | 53    | 24      | 29      | E    | 0           | 274055.397   | -0.117                     | 472.1144  |
| 52   | 1      | 51     | 51    | 1       | 50      | E    | 1           | 274085.729   | 0.006                      | 434.8833  |
| 52   | 2      | 51     | 51    | 2       | 50      | E    | 1           | 274085.729   | 0.006                      | 434.8833  |
| 53   | 25     | 29     | 53    | 24      | 30      | A    | 0           | 274094.376   | -0.041                     | 472.1217  |
| 53   | 25     | 28     | 53    | 24      | 29      | A    | 0           | 274094.376   | -0.041                     | 472.1217  |
| 53   | 25     | 29     | 53    | 24      | 30      | E    | 0           | 274098.702   | -0.064                     | 472.1089  |
| 44   | 20     | 24     | 43    | 20      | 23      | A    | 0           | 274106.381   | -0.035                     | 338.5270  |
| 44   | 20     | 25     | 43    | 20      | 24      | A    | 0           | 274106.381   | -0.035                     | 338.5270  |
| 44   | 20     | 25     | 43    | 20      | 24      | E    | 0           | 274108.739   | -0.087                     | 338.5147  |
| 52   | 1      | 51     | 51    | 1       | 50      | E    | 0           | 274149.295   | -0.027                     | 306.5944  |
| 52   | 2      | 51     | 51    | 2       | 50      | E    | 0           | 274149.295   | -0.027                     | 306.5944  |
| 52   | 1      | 51     | 51    | 1       | 50      | A    | 0           | 274150.551   | 0.027                      | 306.5846  |
| 52   | 1      | 51     | 51    | 2       | 50      | A    | 0           | 274150.551   | 0.027                      | 306.5846  |
| 52   | 2      | 51     | 51    | 1       | 50      | A    | 0           | 274150.551   | 0.027                      | 306.5846  |
| 52   | 2      | 51     | 51    | 2       | 50      | A    | 0           | 274150.551   | 0.027                      | 306.5846  |
| 45   | 9      | 37     | 44    | 8       | 36      | E    | 1           | 274195.074   | 0.032                      | 417.4496  |
| 45   | 9      | 37     | 44    | 8       | 36      | E    | 0           | 274209.771   | -0.009                     | 289.1417  |
| 45   | 9      | 37     | 44    | 8       | 36      | A    | 0           | 274217.198   | -0.062                     | 289.1364  |
| 43   | 13     | 31     | 42    | 13      | 30      | A    | 0           | 274264.358   | -0.036                     | 287.6657  |
| 53   | 0      | 53     | 52    | 0       | 52      | A    | 1           | 274267.910   | 0.223                      | 435.9879  |
| 53   | 0      | 53     | 52    | 1       | 52      | A    | 1           | 274267.910   | 0.223                      | 435.9879  |
| 53   | 1      | 53     | 52    | 0       | 52      | A    | 1           | 274267.910   | 0.223                      | 435.9879  |
| 53   | 1      | 53     | 52    | 1       | 52      | A    | 1           | 274267.910   | 0.223                      | 435.9879  |
| 53   | 0      | 53     | 52    | 0       | 52      | E    | 1           | 274277.847   | 0.021                      | 435.6251  |
| 53   | 0      | 53     | 52    | 1       | 52      | E    | 1           | 274277.847   | 0.021                      | 435.6251  |
| 53   | 1      | 53     | 52    | 0       | 52      | E    | 1           | 274277.847   | 0.021                      | 435.6251  |
| 53   | 1      | 53     | 52    | 1       | 52      | E    | 1           | 274277.847   | 0.021                      | 435.6251  |
| 44   | 10     | 35     | 43    | 10      | 34      | E    | 0           | 274292.274   | 0.054                      | 284.6216  |
| 44   | 10     | 35     | 43    | 10      | 34      | A    | 0           | 274298.273   | -0.011                     | 284.6163  |
| 68   | 8      | 60     | 68    | 7       | 61      | E    | 1           | 274311.883   | 0.273                      | 674.2964  |
| 68   | 8      | 60     | 68    | 8       | 61      | E    | 1           | 274311.883   | 0.273                      | 674.2964  |
| 53   | 0      | 53     | 52    | 0       | 52      | A    | 0           | 274346.889   | -0.165                     | 307.3353  |
| 53   | 0      | 53     | 52    | 1       | 52      | A    | 0           | 274346.889   | -0.165                     | 307.3353  |
| 53   | 1      | 53     | 52    | 0       | 52      | A    | 0           | 274346.889   | -0.165                     | 307.3353  |
| 53   | 1      | 53     | 52    | 1       | 52      | A    | 0           | 274346.889   | -0.165                     | 307.3353  |
| 53   | 0      | 53     | 52    | 0       | 52      | E    | 0           | 274346.889   | 0.156                      | 307.3465  |
| 53   | 1      | 53     | 52    | 1       | 52      | E    | 0           | 274346.889   | 0.156                      | 307.3465  |
| 68   | 8      | 60     | 68    | 7       | 61      | A    | 0           | 274439.839   | -0.132                     | 546.0349  |
| 68   | 9      | 60     | 68    | 8       | 61      | A    | 0           | 274439.839   | -0.132                     | 546.0349  |
| 52   | 25     | 27     | 52    | 24      | 28      | E    | 0           | 274513.639   | -0.069                     | 461.1096  |
| 52   | 25     | 28     | 52    | 24      | 29      | A    | 0           | 274552.345   | -0.033                     | 461.1096  |
| 52   | 25     | 27     | 52    | 24      | 28      | A    | 0           | 274552.345   | -0.033                     | 461.1096  |
| 52   | 25     | 28     | 52    | 24      | 29      | E    | 0           | 274557.111   | -0.038                     | 461.0967  |
| 44   | 19     | 26     | 43    | 19      | 25      | A    | 0           | 274631.337   | -0.034                     | 331.2624  |
| 44   | 19     | 25     | 43    | 19      | 24      | A    | 0           | 274631.337   | -0.036                     | 331.2624  |
| 43   | 12     | 32     | 42    | 12      | 31      | A    | 0           | 274867.426   | 0.076                      | 283.4974  |
| 43   | 12     | 32     | 42    | 12      | 31      | E    | 0           | 274869.958   | -0.060                     | 283.5014  |
| 45   | 10     | 35     | 44    | 11      | 34      | A    | 0           | 274881.617   | -0.054                     | 298.0099  |
| 45   | 10     | 35     | 44    | 11      | 34      | E    | 0           | 274908.541   | -0.009                     | 298.0148  |
| 49   | 12     | 37     | 48    | 13      | 36      | E    | 0           | 274921.920   | 0.020                      | 345.8944  |
| 51   | 25     | 26     | 51    | 24      | 27      | E    | 0           | 274944.498   | -0.015                     | 450.3045  |
| 51   | 25     | 27     | 51    | 24      | 28      | A    | 0           | 274982.952   | -0.012                     | 450.3121  |
| 51   | 25     | 26     | 51    | 24      | 27      | A    | 0           | 274982.952   | -0.012                     | 450.3121  |
| 63   | 5      | 58     | 63    | 4       | 59      | A    | 0           | 274985.823   | -0.007                     | 456.7007  |
| 63   | 6      | 58     | 63    | 5       | 59      | A    | 0           | 274985.823   | -0.007                     | 456.7007  |
| 51   | 25     | 27     | 51    | 24      | 28      | E    | 0           | 274988.138   | 0.007                      | 450.2991  |
| 63   | 5      | 58     | 63    | 4       | 59      | E    | 1           | 274993.191   | -0.035                     | 584.9813  |
| 63   | 6      | 58     | 63    | 5       | 59      | E    | 1           | 274993.191   | -0.035                     | 584.9813  |
| 43   | 10     | 34     | 42    | 9       | 33      | E    | 0           | 275054.638   | -0.015                     | 275.4468  |
| 44   | 18     | 27     | 43    | 18      | 26      | A    | 0           | 275259.093   | -0.016                     | 324.4111  |
| 44   | 18     | 26     | 43    | 18      | 25      | E    | 0           | 275261.503   | -0.044                     | 324.4123  |
| 44   | 18     | 27     | 43    | 18      | 26      | E    | 0           | 275262.694   | 0.051                      | 324.4005  |
| 70   | 9      | 61     | 70    | 8       | 62      | E    | 1           | 275323.744   | 0.475                      | 710.0314  |
| 70   | 10     | 61     | 70    | 9       | 62      | E    | 1           | 275323.744   | 0.475                      | 710.0314  |
| 69   | 26     | 44     | 69    | 25      | 45      | A    | 0           | 275347.775   | 0.057                      | 686.6469  |
| 50   | 25     | 25     | 50    | 24      | 26      | E    | 0           | 275349.208   | -0.077                     | 439.7211  |
| 50   | 25     | 26     | 50    | 24      | 27      | A    | 0           | 275387.343   | -0.182                     | 439.7287  |
| 50   | 25     | 25     | 50    | 24      | 26      | A    | 0           | 275387.343   | -0.182                     | 439.7287  |
| 50   | 25     | 26     | 50    | 24      | 27      | E    | 0           | 275393.052   | -0.013                     | 439.7157  |
| 38   | 10     | 29     | 37    | 9       | 28      | E    | 0           | 275457.491   | -0.077                     | 232.3465  |
| 70   | 9      | 61     | 70    | 8       | 62      | A    | 0           | 275494.336   | -0.162                     | 581.7811  |
| 70   | 10     | 61     | 70    | 9       | 62      | A    | 0           | 275494.336   | -0.163                     | 581.7811  |
| 16   | 16     | 0      | 15    | 15      | 0       | E    | 0           | 275553.261   | -0.063                     | 134.7810  |
| 16   | 16     | 1      | 15    | 15      | 1       | E    | 0           | 275563.543   | 0.028                      | 134.7674  |
| 16   | 16     | 0      | 15    | 15      | 1       | A    | 0           | 275598.611   | -0.006                     | 134.7761  |
| 16   | 16     | 1      | 15    | 15      | 0       | A    | 0           | 275598.611   | -0.006                     | 134.7761  |
| 44   | 9      | 35     | 43    | 9       | 34      | E    | 0           | 275708.689   | 0.049                      | 284.4943  |
| 44   | 9      | 35     | 43    | 9       | 34      | A    | 0           | 275719.394   | -0.010                     | 284.4885  |
| 49   | 25     | 24     | 49    | 24      | 25      | E    | 0           | 275729.321   | 0.015                      | 429.3514  |
| 44   | 9      | 35     | 43    | 9       | 34      | E    | 1           | 275734.272   | 0.064                      | 412.7920  |
| 49   | 25     | 25     | 49    | 24      | 26      | A    | 0           | 275767.317   | -0.030                     | 429.3592  |
| 49   | 25     | 24     | 49    | 24      | 25      | A    | 0           | 275767.317   | -0.030                     | 429.3592  |
| 49   | 25     | 25     | 49    | 24      | 26      | E    | 0           | 275773.223   | -0.013                     | 429.3461  |
| 28   | 10     | 19     | 27    | 9       | 18      | E    | 0           | 275862.990   | -0.033                     | 161.3366  |
| 28   | 10     | 19     | 27    | 9       | 18      | A    | 0           | 275988.501   | -0.066                     | 161.3293  |
| 42   | 10     | 32     | 41    | 10      | 31      | E    | 0           | 276005.301   | -0.034                     | 269.4905  |
| 42   | 10     | 32     | 41    | 10      | 31      | A    | 0           | 276016.316   | 0.013                      | 269.4829  |
| 44   | 17     | 28     | 43    | 17      | 27      | A    | 0           | 276023.432   | 0.214                      | 317.9822  |
| 44   | 17     | 27     | 43    | 17      | 26      | E    | 0           | 276026.027   | -0.013                     | 317.9849  |
| 44   | 17     | 28     | 43    | 17      | 27      | E    | 0           | 276027.733   | -0.016                     | 317.9726  |
| 43   | 13     | 30     | 42    | 13      | 29      | A    | 0           | 276064.051   | -0.050                     | 287.7552  |
| 43   | 13     | 30     | 42    | 13      | 29      | E    | 0           | 276068.998   | 0.074                      | 287.7586  |
| 48   | 25     | 23     | 48    | 24      | 24      | E    | 0           | 276085.754   | -0.042                     | 419.1952  |
| 48   | 25     | 24     | 48    | 24      | 25      | A    | 0           | 276123.600   | -0.047                     | 419.2030  |
| 48   | 25     | 23     | 48    | 24      | 24      | A    | 0           | 276123.600   | -0.047                     | 419.2030  |
| 48   | 25     | 24     | 48    | 24      | 25      | E    | 0           | 276129.843   | -0.021                     | 419.1899  |
| 68   | 26     | 42     | 68    | 25      | 43      | A    | 0           | 276349.182   | -0.011                     | 672.1663  |
| 68   | 26     | 43     | 68    | 25      | 44      | E    | 0           | 276350.481   | -0.109                     | 672.1551  |
| 18   | 15     | 3      | 17    | 14      | 3       | E    | 0           | 276417.865   | -0.039                     | 136.0330  |
| 47   | 25     | 22     | 47    | 24      | 23      | E    | 0           | 276419.860   | -0.053                     | 409.2519  |
| 18   | 15     | 4      | 17    | 14      | 4       | E    | 0           | 276422.635   | 0.032                      | 136.0193  |
| 47   | 25     | 23     | 47    | 24      | 24      | A    | 0           | 276457.472   | -0.114                     | 409.2598  |
| 47   | 25     | 22     | 47    | 24      | 23      | A    | 0           | 276457.472   | -0.114                     | 409.2598  |
| 18   | 15     | 4      | 17    | 14      | 3       | A    | 0           | 276461.195   | -0.010                     | 136.0266  |
| 18   | 15     | 3      | 17    | 14      | 4       | A    | 0           | 276461.195   | -0.010                     | 136.0266  |
| 47   | 25     | 23     | 47    | 24      | 24      | E    | 0           | 276464.107   | -0.002                     | 409.2466  |
| 65   | 6      | 59     | 65    | 5       | 60      | A    | 0           | 276677.500   | -0.073                     | 489.7563  |
| 65   | 7      | 59     | 65    | 6       | 60      | A    | 0           | 276677.500   | -0.073                     | 489.7563  |
| 46   | 25     | 21     | 46    | 24      | 22      | E    | 0           | 276732.724   | -0.041                     | 399.5213  |



| $J'$ | $K'_a$ | $K'_c$ | $J''$ | $K''_a$ | $K''_c$ | Sym. | $v_{tCH_3}$ | $\nu_{Obs.}$ | $\nu_{Obs.} - \nu_{Calc.}$ | $E_{low}$ |
|------|--------|--------|-------|---------|---------|------|-------------|--------------|----------------------------|-----------|
| 46   | 25     | 22     | 46    | 24      | 23      | A    | 0           | 276770.211   | -0.057                     | 399.5292  |
| 46   | 25     | 21     | 46    | 24      | 22      | A    | 0           | 276770.211   | -0.057                     | 399.5292  |
| 46   | 25     | 22     | 46    | 24      | 23      | E    | 0           | 276777.124   | 0.047                      | 399.5160  |
| 44   | 16     | 29     | 43    | 16      | 28      | A    | 0           | 276973.754   | -0.011                     | 311.9883  |
| 44   | 16     | 28     | 43    | 16      | 27      | A    | 0           | 276979.875   | -0.133                     | 311.9885  |
| 44   | 16     | 28     | 43    | 16      | 27      | E    | 0           | 276979.875   | 0.206                      | 311.9927  |
| 44   | 16     | 29     | 43    | 16      | 28      | E    | 0           | 276982.046   | -0.028                     | 311.9801  |
| 45   | 25     | 20     | 45    | 24      | 21      | E    | 0           | 277025.364   | -0.042                     | 390.0029  |
| 45   | 36     | 9      | 44    | 36      | 8       | A    | 0           | 277037.026   | -0.045                     | 517.3351  |
| 45   | 36     | 10     | 44    | 36      | 9       | A    | 0           | 277037.026   | -0.045                     | 517.3351  |
| 45   | 36     | 10     | 44    | 36      | 9       | E    | 0           | 277037.026   | -0.230                     | 517.3230  |
| 45   | 25     | 21     | 45    | 24      | 22      | A    | 0           | 277062.964   | 0.218                      | 390.0109  |
| 45   | 25     | 20     | 45    | 24      | 21      | A    | 0           | 277062.964   | 0.218                      | 390.0109  |
| 45   | 25     | 21     | 45    | 24      | 22      | E    | 0           | 277069.833   | 0.008                      | 389.9976  |
| 20   | 14     | 7      | 19    | 13      | 7       | E    | 0           | 277250.276   | -0.099                     | 138.4980  |
| 20   | 14     | 6      | 19    | 13      | 6       | E    | 0           | 277251.405   | 0.085                      | 138.5117  |
| 20   | 14     | 6      | 19    | 13      | 7       | A    | 0           | 277291.995   | -0.014                     | 138.5039  |
| 20   | 14     | 7      | 19    | 13      | 6       | A    | 0           | 277291.995   | -0.014                     | 138.5039  |
| 67   | 26     | 41     | 67    | 25      | 42      | A    | 0           | 277296.255   | -0.034                     | 657.9078  |
| 44   | 25     | 20     | 44    | 24      | 21      | A    | 0           | 277336.017   | -0.013                     | 380.7044  |
| 44   | 25     | 19     | 44    | 24      | 20      | A    | 0           | 277336.017   | -0.013                     | 380.7044  |
| 44   | 25     | 20     | 44    | 24      | 21      | E    | 0           | 277343.395   | 0.036                      | 380.6911  |
| 45   | 33     | 13     | 44    | 33      | 12      | A    | 0           | 277346.136   | -0.206                     | 477.9677  |
| 45   | 33     | 12     | 44    | 33      | 11      | A    | 0           | 277346.136   | -0.206                     | 477.9677  |
| 45   | 33     | 12     | 44    | 33      | 11      | E    | 0           | 277346.136   | -0.016                     | 477.9625  |
| 45   | 32     | 13     | 44    | 32      | 12      | A    | 0           | 277467.031   | 0.011                      | 465.6138  |
| 45   | 32     | 14     | 44    | 32      | 13      | A    | 0           | 277467.031   | 0.011                      | 465.6138  |
| 45   | 32     | 13     | 44    | 32      | 12      | E    | 0           | 277467.031   | 0.132                      | 465.6071  |
| 43   | 25     | 18     | 43    | 24      | 19      | E    | 0           | 277553.974   | -0.062                     | 371.6014  |
| 43   | 25     | 19     | 43    | 24      | 20      | A    | 0           | 277591.134   | 0.054                      | 371.6095  |
| 43   | 25     | 18     | 43    | 24      | 19      | A    | 0           | 277591.134   | 0.054                      | 371.6095  |
| 45   | 31     | 15     | 44    | 31      | 14      | A    | 0           | 277598.605   | 0.069                      | 453.6448  |
| 45   | 31     | 14     | 44    | 31      | 13      | A    | 0           | 277598.605   | 0.069                      | 453.6448  |
| 43   | 25     | 19     | 43    | 24      | 20      | E    | 0           | 277598.605   | -0.038                     | 371.5962  |
| 45   | 31     | 14     | 44    | 31      | 13      | E    | 0           | 277598.605   | 0.105                      | 453.6368  |
| 42   | 25     | 17     | 42    | 24      | 18      | E    | 0           | 277791.886   | -0.025                     | 362.7177  |
| 42   | 25     | 18     | 42    | 24      | 19      | A    | 0           | 277828.877   | 0.056                      | 362.7258  |
| 42   | 25     | 17     | 42    | 24      | 18      | A    | 0           | 277836.610   | 0.056                      | 362.7258  |
| 42   | 25     | 18     | 42    | 24      | 19      | E    | 0           | 277836.610   | 0.011                      | 362.7125  |
| 45   | 9      | 36     | 44    | 10      | 35      | A    | 0           | 277928.127   | -0.103                     | 293.7760  |
| 45   | 9      | 36     | 44    | 10      | 35      | E    | 0           | 277928.127   | 0.111                      | 293.7710  |
| 22   | 13     | 10     | 21    | 12      | 10      | E    | 0           | 277987.367   | 0.024                      | 142.2208  |
| 22   | 13     | 9      | 21    | 12      | 9       | E    | 0           | 277994.061   | -0.048                     | 142.2343  |
| 41   | 25     | 16     | 41    | 24      | 17      | E    | 0           | 278013.315   | -0.037                     | 354.0449  |
| 22   | 13     | 10     | 21    | 12      | 9       | A    | 0           | 278031.575   | -0.006                     | 142.2252  |
| 41   | 25     | 17     | 41    | 24      | 18      | A    | 0           | 278050.100   | -0.033                     | 354.0530  |
| 41   | 25     | 16     | 41    | 24      | 17      | A    | 0           | 278050.100   | -0.033                     | 354.0530  |
| 41   | 25     | 17     | 41    | 24      | 18      | E    | 0           | 278058.143   | 0.030                      | 354.0396  |
| 62   | 4      | 58     | 62    | 3       | 59      | A    | 0           | 278059.370   | 0.104                      | 435.9060  |
| 62   | 5      | 58     | 62    | 4       | 59      | A    | 0           | 278059.370   | 0.104                      | 435.9060  |
| 45   | 28     | 17     | 44    | 28      | 16      | A    | 0           | 278075.198   | 0.029                      | 420.0539  |
| 45   | 28     | 18     | 44    | 28      | 17      | A    | 0           | 278075.198   | 0.029                      | 420.0539  |
| 45   | 28     | 17     | 44    | 28      | 16      | E    | 0           | 278075.198   | -0.299                     | 420.0427  |
| 45   | 28     | 18     | 44    | 28      | 17      | E    | 0           | 278076.363   | 0.125                      | 420.0418  |
| 67   | 7      | 60     | 67    | 6       | 61      | E    | 1           | 278090.327   | 0.043                      | 652.1514  |
| 67   | 8      | 60     | 67    | 7       | 61      | E    | 1           | 278090.327   | 0.043                      | 652.1514  |
| 44   | 10     | 35     | 43    | 9       | 34      | E    | 0           | 278109.484   | 0.036                      | 284.4943  |
| 44   | 10     | 35     | 43    | 9       | 34      | A    | 0           | 278129.643   | 0.014                      | 284.4885  |
| 28   | 10     | 18     | 27    | 9       | 19      | A    | 0           | 278132.890   | 0.001                      | 161.2700  |
| 28   | 10     | 18     | 27    | 9       | 19      | E    | 0           | 278181.194   | -0.006                     | 161.2762  |
| 66   | 26     | 40     | 66    | 25      | 41      | A    | 0           | 278191.993   | -0.025                     | 643.8707  |
| 66   | 26     | 41     | 66    | 25      | 42      | E    | 0           | 278194.873   | -0.201                     | 643.8592  |
| 44   | 15     | 30     | 43    | 15      | 29      | E    | 0           | 278207.415   | -0.020                     | 306.4423  |
| 44   | 15     | 29     | 43    | 15      | 28      | A    | 0           | 278239.789   | 0.015                      | 306.4502  |
| 40   | 25     | 16     | 40    | 24      | 17      | A    | 0           | 278255.745   | -0.120                     | 345.5908  |
| 40   | 25     | 15     | 40    | 24      | 16      | A    | 0           | 278255.745   | -0.120                     | 345.5908  |
| 40   | 25     | 16     | 40    | 24      | 17      | E    | 0           | 278263.988   | -0.044                     | 345.5774  |
| 45   | 27     | 19     | 44    | 27      | 18      | A    | 0           | 278268.843   | 0.012                      | 409.6316  |
| 45   | 27     | 18     | 44    | 27      | 17      | A    | 0           | 278268.843   | 0.012                      | 409.6316  |
| 45   | 27     | 18     | 44    | 27      | 17      | E    | 0           | 278270.089   | 0.050                      | 409.6203  |
| 48   | 6      | 42     | 47    | 6       | 41      | A    | 1           | 278405.506   | -0.087                     | 434.1042  |
| 48   | 6      | 42     | 47    | 7       | 41      | A    | 1           | 278405.506   | 0.164                      | 434.1042  |
| 48   | 7      | 42     | 47    | 6       | 41      | A    | 1           | 278405.506   | -0.218                     | 434.1042  |
| 48   | 7      | 42     | 47    | 7       | 41      | A    | 1           | 278405.506   | 0.033                      | 434.1042  |
| 39   | 25     | 14     | 39    | 24      | 15      | E    | 0           | 278410.298   | 0.015                      | 337.3306  |
| 39   | 25     | 15     | 39    | 24      | 16      | A    | 0           | 278446.802   | -0.028                     | 337.3389  |
| 39   | 25     | 14     | 39    | 24      | 15      | A    | 0           | 278446.802   | -0.028                     | 337.3389  |
| 39   | 25     | 15     | 39    | 24      | 16      | E    | 0           | 278455.157   | -0.012                     | 337.3254  |
| 49   | 5      | 44     | 48    | 5       | 43      | A    | 1           | 278463.194   | -0.050                     | 437.0292  |
| 49   | 5      | 44     | 48    | 6       | 43      | A    | 1           | 278463.194   | -0.044                     | 437.0292  |
| 49   | 6      | 44     | 48    | 5       | 43      | A    | 1           | 278463.194   | -0.053                     | 437.0292  |
| 49   | 6      | 44     | 48    | 6       | 43      | A    | 1           | 278463.194   | -0.047                     | 437.0292  |
| 47   | 7      | 40     | 46    | 8       | 39      | A    | 1           | 278466.305   | 0.025                      | 430.6939  |
| 47   | 8      | 40     | 46    | 8       | 39      | A    | 1           | 278470.344   | 0.050                      | 430.6939  |
| 47   | 7      | 40     | 46    | 7       | 39      | A    | 1           | 278473.665   | 0.007                      | 430.6937  |
| 47   | 8      | 40     | 46    | 7       | 39      | A    | 1           | 278477.695   | 0.023                      | 430.6937  |
| 26   | 11     | 15     | 25    | 10      | 15      | E    | 0           | 278502.073   | 0.000                      | 153.5522  |
| 24   | 12     | 13     | 23    | 11      | 13      | E    | 0           | 278502.073   | -0.134                     | 147.2172  |
| 26   | 11     | 16     | 25    | 10      | 15      | A    | 0           | 278508.617   | -0.020                     | 153.5415  |
| 24   | 12     | 12     | 23    | 11      | 12      | E    | 0           | 278515.126   | -0.018                     | 147.2301  |
| 29   | 9      | 20     | 28    | 8       | 21      | E    | 0           | 278533.197   | -0.026                     | 164.2221  |
| 29   | 9      | 20     | 28    | 8       | 21      | A    | 0           | 278545.375   | 0.033                      | 164.2143  |
| 24   | 12     | 13     | 23    | 11      | 12      | A    | 0           | 278548.757   | 0.204                      | 147.2198  |
| 48   | 6      | 42     | 47    | 6       | 41      | E    | 1           | 278551.948   | -0.093                     | 433.9314  |
| 48   | 6      | 42     | 47    | 7       | 41      | E    | 1           | 278551.948   | 0.211                      | 433.9314  |
| 48   | 7      | 42     | 47    | 6       | 41      | E    | 1           | 278551.948   | -0.253                     | 433.9314  |
| 48   | 7      | 42     | 47    | 7       | 41      | E    | 1           | 278551.948   | 0.051                      | 433.9314  |
| 26   | 11     | 15     | 25    | 10      | 16      | A    | 0           | 278555.881   | 0.012                      | 153.5402  |
| 38   | 25     | 13     | 38    | 24      | 14      | E    | 0           | 278587.360   | -0.008                     | 329.2886  |
| 49   | 5      | 44     | 48    | 5       | 43      | E    | 1           | 278589.441   | -0.042                     | 436.8406  |
| 49   | 5      | 44     | 48    | 6       | 43      | E    | 1           | 278589.441   | -0.034                     | 436.8406  |
| 49   | 6      | 44     | 48    | 5       | 43      | E    | 1           | 278589.441   | -0.045                     | 436.8406  |
| 49   | 6      | 44     | 48    | 6       | 43      | E    | 1           | 278589.441   | -0.038                     | 436.8406  |
| 50   | 4      | 46     | 49    | 4       | 45      | A    | 1           | 278591.978   | -0.071                     | 439.4978  |
| 50   | 4      | 46     | 49    | 5       | 45      | A    | 1           | 278591.978   | -0.071                     | 439.4978  |
| 50   | 5      | 46     | 49    | 4       | 45      | A    | 1           | 278591.978   | -0.071                     | 439.4978  |
| 50   | 5      | 46     | 49    | 5       | 45      | A    | 1           | 278591.978   | -0.071                     | 439.4978  |
| 48   | 6      | 42     | 47    | 6       | 41      | E    | 0           | 278599.395   | -0.071                     | 305.6209  |
| 48   | 7      | 42     | 47    | 7       | 41      | E    | 0           | 278599.395   | 0.062                      | 305.6209  |
| 48   | 6      | 42     | 47    | 6       | 41      | A    | 0           | 278603.919   | -0.070                     | 305.6154  |
| 48   | 6      | 42     | 47    | 7       | 41      | A    | 0           | 278603.919   | 0.213                      | 305.6154  |
| 48   | 7      | 42     | 47    | 6       | 41      | A    | 0           | 278603.919   | -0.218                     | 305.6154  |
| 48   | 7      | 42     | 47    | 7       | 41      | A    | 0           | 278603.919   | 0.065                      | 305.6154  |
| 47   | 11     | 36     | 46    | 12      | 35      | A    | 0           | 278620.018   | -0.199                     | 321.4167  |
| 38   | 25     | 14     | 38    | 24      | 15      | A    | 0           | 278623.788   | -0.020                     | 329.2969  |
| 38   | 25     | 13     | 38    | 24      | 14      | A    | 0           | 278623.788   | -0.020                     | 329.2969  |



| $J'$ | $K'_a$ | $K'_c$ | $J''$ | $K''_a$ | $K''_c$ | Sym. | $v_{tCH_3}$ | $\nu_{Obs.}$ | $\nu_{Obs.} - \nu_{Calc.}$ | $E_{low}$ |
|------|--------|--------|-------|---------|---------|------|-------------|--------------|----------------------------|-----------|
| 38   | 25     | 14     | 38    | 24      | 15      | E    | 0           | 278632.319   | 0.011                      | 329.2835  |
| 47   | 7      | 40     | 46    | 8       | 39      | E    | 1           | 278634.928   | 0.010                      | 430.5310  |
| 49   | 5      | 44     | 48    | 5       | 43      | E    | 0           | 278640.639   | -0.004                     | 308.5314  |
| 49   | 6      | 44     | 48    | 6       | 43      | E    | 0           | 278640.639   | -0.001                     | 308.5314  |
| 49   | 5      | 44     | 48    | 5       | 43      | A    | 0           | 278644.542   | 0.005                      | 308.5255  |
| 49   | 5      | 44     | 48    | 6       | 43      | A    | 0           | 278644.542   | 0.013                      | 308.5255  |
| 49   | 6      | 44     | 48    | 5       | 43      | A    | 0           | 278644.542   | 0.002                      | 308.5255  |
| 49   | 6      | 44     | 48    | 6       | 43      | A    | 0           | 278644.542   | 0.009                      | 308.5255  |
| 47   | 8      | 40     | 46    | 7       | 39      | E    | 1           | 278648.361   | -0.023                     | 430.5307  |
| 46   | 8      | 38     | 45    | 9       | 37      | A    | 1           | 278650.854   | 0.055                      | 426.7555  |
| 47   | 11     | 36     | 46    | 12      | 35      | E    | 0           | 278675.906   | 0.054                      | 321.4209  |
| 47   | 7      | 40     | 46    | 8       | 39      | E    | 0           | 278677.442   | -0.021                     | 302.2210  |
| 47   | 8      | 40     | 46    | 8       | 39      | E    | 0           | 278681.657   | -0.234                     | 302.2210  |
| 47   | 7      | 40     | 46    | 8       | 39      | A    | 0           | 278682.706   | 0.032                      | 302.2158  |
| 47   | 7      | 40     | 46    | 7       | 39      | E    | 0           | 278685.669   | 0.096                      | 302.2207  |
| 47   | 8      | 40     | 46    | 8       | 39      | A    | 0           | 278687.103   | -0.025                     | 302.2158  |
| 47   | 8      | 40     | 46    | 7       | 39      | E    | 0           | 278689.965   | -0.038                     | 302.2207  |
| 47   | 7      | 40     | 46    | 7       | 39      | A    | 0           | 278691.019   | 0.189                      | 302.2156  |
| 47   | 8      | 40     | 46    | 7       | 39      | A    | 0           | 278695.283   | -0.001                     | 302.2156  |
| 50   | 4      | 46     | 49    | 4       | 45      | E    | 1           | 278698.736   | -0.015                     | 439.2874  |
| 50   | 4      | 46     | 49    | 5       | 45      | E    | 1           | 278698.736   | -0.015                     | 439.2874  |
| 50   | 5      | 46     | 49    | 4       | 45      | E    | 1           | 278698.736   | -0.015                     | 439.2874  |
| 50   | 5      | 46     | 49    | 5       | 45      | E    | 1           | 278698.736   | -0.015                     | 439.2874  |
| 37   | 25     | 12     | 37    | 24      | 13      | E    | 0           | 278751.173   | -0.038                     | 321.4563  |
| 50   | 4      | 46     | 49    | 4       | 45      | E    | 0           | 278753.033   | -0.002                     | 310.9813  |
| 50   | 5      | 46     | 49    | 5       | 45      | E    | 0           | 278753.033   | -0.002                     | 310.9813  |
| 50   | 4      | 46     | 49    | 4       | 45      | A    | 0           | 278756.336   | 0.015                      | 310.9747  |
| 50   | 4      | 46     | 49    | 5       | 45      | A    | 0           | 278756.336   | 0.015                      | 310.9747  |
| 50   | 5      | 46     | 49    | 4       | 45      | A    | 0           | 278756.336   | 0.015                      | 310.9747  |
| 50   | 5      | 46     | 49    | 5       | 45      | A    | 0           | 278756.336   | 0.015                      | 310.9747  |
| 42   | 11     | 31     | 41    | 11      | 30      | E    | 0           | 278761.843   | -0.102                     | 271.9083  |
| 51   | 3      | 48     | 50    | 3       | 47      | A    | 1           | 278763.111   | -0.060                     | 441.5298  |
| 51   | 3      | 48     | 50    | 4       | 47      | A    | 1           | 278763.111   | -0.060                     | 441.5298  |
| 51   | 4      | 48     | 50    | 3       | 47      | A    | 1           | 278763.111   | -0.060                     | 441.5298  |
| 51   | 4      | 48     | 50    | 4       | 47      | A    | 1           | 278763.111   | -0.060                     | 441.5298  |
| 37   | 25     | 13     | 37    | 24      | 14      | A    | 0           | 278787.519   | -0.031                     | 321.4647  |
| 37   | 25     | 12     | 37    | 24      | 13      | A    | 0           | 278787.519   | -0.031                     | 321.4647  |
| 37   | 25     | 13     | 37    | 24      | 14      | E    | 0           | 278796.202   | 0.004                      | 321.4512  |
| 46   | 8      | 38     | 45    | 8       | 37      | A    | 1           | 278806.449   | -0.001                     | 426.7503  |
| 51   | 3      | 48     | 50    | 3       | 47      | E    | 1           | 278849.527   | -0.021                     | 441.2918  |
| 51   | 4      | 48     | 50    | 4       | 47      | E    | 1           | 278849.527   | -0.021                     | 441.2918  |
| 44   | 11     | 34     | 43    | 11      | 33      | E    | 0           | 278859.945   | -0.021                     | 288.7130  |
| 46   | 8      | 38     | 45    | 9       | 37      | E    | 0           | 278863.406   | -0.040                     | 288.7080  |
| 46   | 8      | 38     | 45    | 9       | 37      | E    | 0           | 278874.374   | -0.020                     | 298.2884  |
| 46   | 9      | 38     | 45    | 8       | 37      | A    | 0           | 278879.966   | -0.012                     | 298.2833  |
| 46   | 9      | 38     | 45    | 8       | 37      | A    | 1           | 278895.842   | 0.165                      | 426.7503  |
| 36   | 25     | 11     | 36    | 24      | 12      | E    | 0           | 278902.514   | -0.018                     | 313.8334  |
| 51   | 3      | 48     | 50    | 3       | 47      | E    | 0           | 278906.919   | -0.003                     | 312.9902  |
| 51   | 4      | 48     | 50    | 4       | 47      | E    | 0           | 278906.919   | -0.003                     | 312.9902  |
| 51   | 3      | 48     | 50    | 3       | 47      | A    | 0           | 278909.577   | 0.000                      | 312.9828  |
| 51   | 3      | 48     | 50    | 4       | 47      | A    | 0           | 278909.577   | 0.000                      | 312.9828  |
| 51   | 4      | 48     | 50    | 3       | 47      | A    | 0           | 278909.577   | 0.000                      | 312.9828  |
| 51   | 4      | 48     | 50    | 4       | 47      | A    | 0           | 278909.577   | 0.000                      | 312.9828  |
| 36   | 25     | 12     | 36    | 24      | 13      | A    | 0           | 278938.716   | -0.061                     | 313.8418  |
| 36   | 25     | 11     | 36    | 24      | 12      | A    | 0           | 278938.716   | -0.061                     | 313.8418  |
| 36   | 25     | 12     | 36    | 24      | 13      | E    | 0           | 278947.606   | 0.045                      | 313.8283  |
| 52   | 2      | 50     | 51    | 2       | 49      | A    | 1           | 278959.823   | -0.042                     | 443.1399  |
| 52   | 2      | 50     | 51    | 3       | 49      | A    | 1           | 278959.823   | -0.042                     | 443.1399  |
| 52   | 3      | 50     | 51    | 2       | 49      | A    | 1           | 278959.823   | -0.042                     | 443.1399  |
| 52   | 3      | 50     | 51    | 3       | 49      | A    | 1           | 278959.823   | -0.042                     | 443.1399  |
| 46   | 9      | 38     | 45    | 9       | 37      | E    | 0           | 278971.276   | -0.103                     | 298.2884  |
| 46   | 9      | 38     | 45    | 9       | 37      | A    | 0           | 278977.318   | -0.127                     | 298.2833  |
| 46   | 8      | 38     | 45    | 8       | 37      | E    | 1           | 279012.405   | -0.013                     | 426.5898  |
| 52   | 2      | 50     | 51    | 2       | 49      | E    | 1           | 279024.028   | 0.004                      | 442.8677  |
| 52   | 3      | 50     | 51    | 3       | 49      | E    | 1           | 279024.028   | 0.004                      | 442.8677  |
| 65   | 26     | 39     | 65    | 25      | 40      | A    | 0           | 279039.240   | -0.011                     | 630.0542  |
| 35   | 25     | 10     | 35    | 24      | 11      | E    | 0           | 279041.854   | -0.174                     | 306.4197  |
| 46   | 8      | 38     | 45    | 8       | 37      | E    | 0           | 279043.028   | -0.010                     | 298.2827  |
| 65   | 26     | 40     | 65    | 25      | 41      | E    | 0           | 279043.028   | -0.049                     | 630.0426  |
| 46   | 8      | 38     | 45    | 8       | 37      | A    | 0           | 279049.365   | -0.062                     | 298.2777  |
| 35   | 25     | 11     | 35    | 24      | 12      | A    | 0           | 279078.163   | -0.022                     | 306.4281  |
| 35   | 25     | 10     | 35    | 24      | 11      | A    | 0           | 279078.163   | -0.022                     | 306.4281  |
| 52   | 2      | 50     | 51    | 2       | 49      | E    | 0           | 279084.878   | 0.019                      | 314.5726  |
| 52   | 3      | 50     | 51    | 3       | 49      | E    | 0           | 279084.878   | 0.019                      | 314.5726  |
| 52   | 2      | 50     | 51    | 2       | 49      | A    | 0           | 279086.847   | 0.018                      | 314.5641  |
| 52   | 2      | 50     | 51    | 3       | 49      | A    | 0           | 279086.847   | 0.018                      | 314.5641  |
| 52   | 3      | 50     | 51    | 2       | 49      | A    | 0           | 279086.847   | 0.018                      | 314.5641  |
| 52   | 3      | 50     | 51    | 3       | 49      | A    | 0           | 279086.847   | 0.018                      | 314.5641  |
| 46   | 9      | 38     | 45    | 8       | 37      | E    | 1           | 279115.792   | 0.044                      | 426.5898  |
| 46   | 9      | 38     | 45    | 8       | 37      | E    | 0           | 279140.050   | 0.027                      | 298.2827  |
| 46   | 9      | 38     | 45    | 8       | 37      | A    | 0           | 279146.893   | -0.001                     | 298.2777  |
| 34   | 25     | 9      | 34    | 24      | 10      | E    | 0           | 279170.320   | -0.045                     | 299.2149  |
| 53   | 1      | 52     | 52    | 1       | 51      | A    | 1           | 279172.012   | 0.008                      | 444.3392  |
| 53   | 1      | 52     | 52    | 2       | 51      | A    | 1           | 279172.012   | 0.008                      | 444.3392  |
| 53   | 2      | 52     | 52    | 1       | 51      | A    | 1           | 279172.012   | 0.008                      | 444.3392  |
| 53   | 2      | 52     | 52    | 2       | 51      | A    | 1           | 279172.012   | 0.008                      | 444.3392  |
| 34   | 25     | 10     | 34    | 24      | 11      | A    | 0           | 279206.441   | 0.002                      | 299.2233  |
| 34   | 25     | 9      | 34    | 24      | 10      | A    | 0           | 279206.441   | 0.002                      | 299.2233  |
| 53   | 2      | 52     | 52    | 2       | 51      | E    | 1           | 279211.074   | 0.019                      | 444.0258  |
| 34   | 25     | 10     | 34    | 24      | 11      | E    | 0           | 279215.573   | 0.112                      | 299.2097  |
| 53   | 1      | 52     | 52    | 1       | 51      | E    | 0           | 279276.057   | -0.017                     | 315.7390  |
| 53   | 2      | 52     | 52    | 2       | 51      | E    | 0           | 279276.057   | -0.017                     | 315.7390  |
| 53   | 1      | 52     | 52    | 1       | 51      | A    | 0           | 279277.318   | 0.045                      | 315.7292  |
| 53   | 1      | 52     | 52    | 2       | 51      | A    | 0           | 279277.318   | 0.045                      | 315.7292  |
| 53   | 2      | 52     | 52    | 1       | 51      | A    | 0           | 279277.318   | 0.045                      | 315.7292  |
| 53   | 2      | 52     | 52    | 2       | 51      | A    | 0           | 279277.318   | 0.045                      | 315.7292  |
| 33   | 25     | 8      | 33    | 24      | 9       | E    | 0           | 279288.123   | -0.062                     | 292.2187  |
| 45   | 23     | 23     | 44    | 23      | 22      | A    | 0           | 279310.707   | -0.049                     | 371.8475  |
| 45   | 23     | 22     | 44    | 23      | 21      | A    | 0           | 279310.707   | -0.049                     | 371.8475  |
| 45   | 23     | 22     | 44    | 23      | 21      | E    | 0           | 279312.379   | -0.185                     | 371.8409  |
| 33   | 25     | 9      | 33    | 24      | 10      | A    | 0           | 279324.152   | -0.030                     | 292.2271  |
| 33   | 25     | 8      | 33    | 24      | 9       | A    | 0           | 279324.152   | -0.030                     | 292.2271  |
| 33   | 25     | 9      | 33    | 24      | 10      | E    | 0           | 279333.414   | 0.105                      | 292.2135  |
| 54   | 0      | 54     | 53    | 0       | 53      | A    | 1           | 279393.387   | 0.011                      | 445.1365  |
| 54   | 0      | 54     | 53    | 1       | 53      | A    | 1           | 279393.387   | 0.011                      | 445.1365  |
| 54   | 1      | 54     | 53    | 0       | 53      | A    | 1           | 279393.387   | 0.011                      | 445.1365  |
| 54   | 1      | 54     | 53    | 1       | 53      | A    | 1           | 279393.387   | 0.011                      | 445.1365  |
| 32   | 25     | 7      | 32    | 24      | 8       | E    | 0           | 279396.048   | -0.060                     | 285.4308  |
| 54   | 0      | 54     | 53    | 0       | 53      | E    | 1           | 279403.462   | 0.036                      | 444.7740  |
| 54   | 1      | 54     | 53    | 1       | 53      | E    | 1           | 279403.462   | 0.036                      | 444.7740  |
| 45   | 10     | 36     | 44    | 10      | 35      | A    | 0           | 279417.321   | -0.024                     | 293.7660  |
| 32   | 25     | 8      | 32    | 24      | 9       | A    | 0           | 279431.964   | -0.068                     | 285.4393  |
| 32   | 25     | 7      | 32    | 24      | 8       | A    | 0           | 279431.964   | -0.068                     | 285.4393  |
| 32   | 25     | 8      | 32    | 24      | 9       | E    | 0           | 279441.363   | 0.108                      | 285.4257  |
| 54   | 0      | 54     | 53    | 0       | 53      | A    | 0           | 279473.860   | -0.146                     | 316.4865  |
| 54   | 0      | 54     | 53    | 1       | 53      | A    | 0           | 279473.860   | -0.146                     | 316.4865  |



| $J'$ | $K'_a$ | $K'_c$ | $J''$ | $K''_a$ | $K''_c$ | Sym. | $v_{tCH_3}$ | $\nu_{Obs.}$ | $\nu_{Obs.} - \nu_{Calc.}$ | $E_{low}$ |
|------|--------|--------|-------|---------|---------|------|-------------|--------------|----------------------------|-----------|
| 54   | 1      | 54     | 53    | 0       | 53      | A    | 0           | 279473.860   | -0.146                     | 316.4865  |
| 54   | 1      | 54     | 53    | 1       | 53      | A    | 0           | 279473.860   | -0.146                     | 316.4865  |
| 54   | 0      | 54     | 53    | 0       | 53      | E    | 0           | 279473.860   | 0.171                      | 316.4977  |
| 54   | 1      | 54     | 53    | 1       | 53      | E    | 0           | 279473.860   | 0.171                      | 316.4977  |
| 69   | 8      | 61     | 69    | 7       | 62      | A    | 0           | 279476.097   | -0.099                     | 559.0776  |
| 69   | 9      | 61     | 69    | 8       | 62      | A    | 0           | 279476.097   | -0.099                     | 559.0776  |
| 31   | 25     | 7      | 31    | 24      | 8       | A    | 0           | 279530.522   | -0.065                     | 278.8596  |
| 31   | 25     | 6      | 31    | 24      | 7       | A    | 0           | 279530.522   | -0.065                     | 278.8596  |
| 30   | 25     | 6      | 30    | 24      | 7       | A    | 0           | 279620.373   | -0.044                     | 272.4879  |
| 30   | 25     | 5      | 30    | 24      | 6       | A    | 0           | 279620.373   | -0.044                     | 272.4879  |
| 44   | 14     | 31     | 43    | 14      | 30      | A    | 0           | 279653.264   | -0.036                     | 301.3856  |
| 45   | 22     | 23     | 44    | 22      | 22      | A    | 0           | 279666.294   | 0.006                      | 363.3872  |
| 45   | 22     | 24     | 44    | 22      | 23      | A    | 0           | 279666.294   | 0.006                      | 363.3872  |
| 45   | 22     | 24     | 44    | 22      | 23      | E    | 0           | 279668.122   | 0.066                      | 363.3740  |
| 44   | 14     | 31     | 43    | 14      | 30      | E    | 0           | 279679.724   | 0.057                      | 301.3852  |
| 29   | 25     | 5      | 29    | 24      | 6       | A    | 0           | 279702.006   | -0.067                     | 266.3238  |
| 29   | 25     | 4      | 29    | 24      | 5       | A    | 0           | 279702.006   | -0.067                     | 266.3238  |
| 28   | 25     | 3      | 28    | 24      | 4       | E    | 0           | 279740.340   | -0.065                     | 260.3588  |
| 64   | 26     | 38     | 64    | 25      | 39      | E    | 0           | 279802.338   | -0.040                     | 616.4505  |
| 64   | 26     | 38     | 64    | 25      | 39      | A    | 0           | 279840.634   | -0.001                     | 616.4579  |
| 64   | 26     | 39     | 64    | 25      | 40      | E    | 0           | 279845.131   | -0.059                     | 616.4461  |
| 64   | 5      | 59     | 64    | 4       | 60      | A    | 0           | 279949.576   | 0.023                      | 468.3913  |
| 64   | 6      | 59     | 64    | 5       | 60      | A    | 0           | 279949.576   | 0.023                      | 468.3913  |
| 64   | 5      | 59     | 64    | 4       | 60      | E    | 1           | 279954.973   | -0.226                     | 596.6691  |
| 64   | 6      | 59     | 64    | 5       | 60      | E    | 1           | 279954.973   | -0.226                     | 596.6691  |
| 45   | 21     | 25     | 44    | 21      | 24      | A    | 0           | 280076.928   | -0.037                     | 355.3268  |
| 45   | 21     | 24     | 44    | 21      | 23      | A    | 0           | 280076.928   | -0.037                     | 355.3268  |
| 45   | 21     | 24     | 44    | 21      | 23      | E    | 0           | 280079.040   | -0.048                     | 355.3231  |
| 44   | 14     | 30     | 43    | 14      | 29      | E    | 0           | 280126.960   | 0.008                      | 301.4096  |
| 44   | 14     | 30     | 43    | 14      | 29      | A    | 0           | 280141.322   | -0.048                     | 301.4066  |
| 29   | 10     | 20     | 28    | 9       | 19      | E    | 0           | 280254.740   | 0.025                      | 167.3004  |
| 45   | 9      | 36     | 44    | 9       | 35      | E    | 0           | 280328.825   | 0.000                      | 293.6910  |
| 45   | 9      | 36     | 44    | 9       | 35      | A    | 0           | 280338.420   | -0.036                     | 293.6856  |
| 29   | 10     | 20     | 28    | 9       | 19      | A    | 0           | 280346.271   | -0.022                     | 167.2932  |
| 43   | 10     | 33     | 42    | 10      | 32      | E    | 0           | 280530.971   | -0.024                     | 278.6970  |
| 43   | 10     | 33     | 42    | 10      | 32      | A    | 0           | 280544.793   | -0.011                     | 278.6898  |
| 45   | 20     | 25     | 44    | 20      | 24      | A    | 0           | 280556.152   | -0.062                     | 347.6703  |
| 45   | 20     | 26     | 44    | 20      | 25      | A    | 0           | 280556.152   | -0.061                     | 347.6703  |
| 45   | 20     | 25     | 44    | 20      | 24      | E    | 0           | 280558.589   | 0.096                      | 347.6682  |
| 63   | 26     | 37     | 63    | 25      | 38      | E    | 0           | 280560.674   | -0.071                     | 603.0735  |
| 63   | 26     | 37     | 63    | 25      | 38      | A    | 0           | 280598.607   | -0.013                     | 603.0810  |
| 63   | 26     | 38     | 63    | 25      | 39      | A    | 0           | 280598.607   | -0.014                     | 603.0810  |
| 63   | 26     | 38     | 63    | 25      | 39      | E    | 0           | 280603.755   | -0.112                     | 603.0691  |
| 61   | 3      | 58     | 61    | 2       | 59      | A    | 0           | 280933.450   | 0.121                      | 415.3513  |
| 61   | 4      | 58     | 61    | 3       | 59      | A    | 0           | 280933.450   | 0.121                      | 415.3513  |
| 44   | 13     | 32     | 43    | 13      | 31      | A    | 0           | 281050.020   | -0.023                     | 296.8142  |
| 44   | 13     | 32     | 43    | 13      | 31      | E    | 0           | 281057.180   | -0.037                     | 296.8169  |
| 45   | 19     | 27     | 44    | 19      | 26      | A    | 0           | 281122.300   | -0.026                     | 340.4232  |
| 44   | 12     | 33     | 43    | 12      | 32      | A    | 0           | 281203.609   | -0.011                     | 292.6659  |
| 44   | 12     | 33     | 43    | 12      | 32      | E    | 0           | 281205.008   | -0.024                     | 292.6701  |
| 62   | 26     | 36     | 62    | 25      | 37      | E    | 0           | 281277.912   | -0.061                     | 589.9153  |
| 62   | 26     | 36     | 62    | 25      | 37      | A    | 0           | 281315.453   | -0.031                     | 589.9229  |
| 62   | 26     | 37     | 62    | 25      | 38      | A    | 0           | 281315.453   | -0.031                     | 589.9229  |
| 62   | 26     | 37     | 62    | 25      | 38      | E    | 0           | 281321.281   | -0.105                     | 589.9110  |
| 36   | 10     | 27     | 35    | 9       | 26      | E    | 0           | 281576.520   | -0.080                     | 216.2337  |
| 66   | 6      | 60     | 66    | 5       | 61      | E    | 1           | 281616.032   | -0.169                     | 630.2262  |
| 66   | 7      | 60     | 66    | 6       | 61      | E    | 1           | 281616.032   | -0.169                     | 630.2262  |
| 66   | 6      | 60     | 66    | 5       | 61      | E    | 0           | 281631.714   | -0.166                     | 501.9577  |
| 66   | 7      | 60     | 66    | 6       | 61      | E    | 0           | 281631.714   | -0.166                     | 501.9577  |
| 36   | 10     | 27     | 35    | 9       | 26      | A    | 0           | 281652.457   | 0.002                      | 216.2251  |
| 66   | 6      | 60     | 66    | 5       | 61      | A    | 0           | 281659.160   | -0.053                     | 501.9540  |
| 66   | 7      | 60     | 66    | 6       | 61      | A    | 0           | 281659.160   | -0.053                     | 501.9540  |
| 17   | 16     | 1      | 16    | 15      | 1       | E    | 0           | 281700.334   | -0.102                     | 138.0647  |
| 17   | 16     | 2      | 16    | 15      | 2       | E    | 0           | 281710.642   | 0.037                      | 138.0511  |
| 17   | 16     | 1      | 16    | 15      | 2       | A    | 0           | 281745.713   | -0.007                     | 138.0598  |
| 17   | 16     | 2      | 16    | 15      | 1       | A    | 0           | 281745.713   | -0.007                     | 138.0598  |
| 45   | 18     | 28     | 44    | 18      | 27      | A    | 0           | 281801.101   | -0.002                     | 333.5928  |
| 45   | 18     | 27     | 44    | 18      | 26      | E    | 0           | 281803.694   | -0.040                     | 333.5940  |
| 45   | 18     | 28     | 44    | 18      | 27      | E    | 0           | 281804.926   | -0.019                     | 333.5822  |
| 45   | 10     | 36     | 44    | 9       | 35      | E    | 0           | 281811.799   | -0.012                     | 293.6910  |
| 43   | 12     | 31     | 42    | 12      | 30      | A    | 0           | 281826.410   | -0.138                     | 283.9914  |
| 45   | 10     | 36     | 44    | 9       | 35      | A    | 0           | 281827.599   | 0.028                      | 293.6856  |
| 43   | 12     | 31     | 42    | 12      | 30      | E    | 0           | 281839.571   | -0.014                     | 283.9968  |
| 63   | 4      | 59     | 63    | 3       | 60      | A    | 1           | 281891.187   | 0.238                      | 575.7409  |
| 63   | 5      | 59     | 63    | 4       | 60      | A    | 1           | 281891.187   | 0.238                      | 575.7409  |
| 61   | 26     | 35     | 61    | 25      | 36      | E    | 0           | 281956.109   | -0.074                     | 576.9755  |
| 61   | 26     | 35     | 61    | 25      | 36      | A    | 0           | 281993.308   | -0.038                     | 576.9832  |
| 61   | 26     | 36     | 61    | 25      | 37      | A    | 0           | 281993.308   | -0.039                     | 576.9832  |
| 61   | 26     | 36     | 61    | 25      | 37      | E    | 0           | 281999.779   | -0.089                     | 576.9712  |
| 19   | 15     | 4      | 18    | 14      | 4       | E    | 0           | 282559.090   | -0.104                     | 139.7337  |
| 19   | 15     | 5      | 18    | 14      | 5       | E    | 0           | 282563.866   | 0.015                      | 139.7200  |
| 60   | 26     | 34     | 60    | 25      | 35      | E    | 0           | 282597.318   | -0.040                     | 564.2534  |
| 19   | 15     | 5      | 18    | 14      | 4       | A    | 0           | 282602.485   | 0.010                      | 139.7273  |
| 19   | 15     | 4      | 18    | 14      | 5       | A    | 0           | 282602.485   | 0.010                      | 139.7273  |
| 45   | 17     | 29     | 44    | 17      | 28      | A    | 0           | 282630.260   | -0.091                     | 327.1893  |
| 45   | 17     | 28     | 44    | 17      | 27      | A    | 0           | 282631.411   | -0.018                     | 327.1893  |
| 45   | 17     | 29     | 44    | 17      | 28      | E    | 0           | 282635.484   | -0.035                     | 327.1799  |
| 60   | 26     | 35     | 60    | 25      | 36      | E    | 0           | 282641.210   | -0.086                     | 564.2492  |
| 63   | 4      | 59     | 63    | 3       | 60      | A    | 0           | 283007.809   | 0.060                      | 447.2606  |
| 63   | 5      | 59     | 63    | 4       | 60      | A    | 0           | 283007.809   | 0.060                      | 447.2606  |
| 63   | 4      | 59     | 63    | 3       | 60      | E    | 1           | 283062.273   | -0.236                     | 575.5393  |
| 63   | 5      | 59     | 63    | 4       | 60      | E    | 1           | 283062.273   | -0.236                     | 575.5393  |
| 68   | 7      | 61     | 68    | 6       | 62      | E    | 1           | 283091.169   | 0.110                      | 664.8535  |
| 68   | 8      | 61     | 68    | 7       | 62      | E    | 1           | 283091.169   | 0.110                      | 664.8535  |
| 68   | 7      | 61     | 68    | 6       | 62      | E    | 0           | 283157.688   | -0.086                     | 536.5916  |
| 68   | 8      | 61     | 68    | 7       | 62      | E    | 0           | 283157.688   | -0.086                     | 536.5916  |
| 68   | 7      | 61     | 68    | 6       | 62      | A    | 0           | 283180.988   | -0.140                     | 536.5890  |
| 68   | 8      | 61     | 68    | 7       | 62      | A    | 0           | 283180.988   | -0.140                     | 536.5890  |
| 59   | 26     | 33     | 59    | 25      | 34      | E    | 0           | 283203.299   | -0.053                     | 551.7486  |
| 59   | 26     | 33     | 59    | 25      | 34      | A    | 0           | 283239.821   | -0.042                     | 551.7567  |
| 59   | 26     | 34     | 59    | 25      | 35      | A    | 0           | 283239.821   | -0.042                     | 551.7567  |
| 59   | 26     | 34     | 59    | 25      | 35      | E    | 0           | 283247.439   | -0.085                     | 551.7444  |
| 21   | 14     | 8      | 20    | 13      | 8       | E    | 0           | 283373.430   | -0.078                     | 142.6200  |
| 21   | 14     | 7      | 20    | 13      | 7       | E    | 0           | 283374.604   | 0.070                      | 142.6336  |
| 21   | 14     | 7      | 20    | 13      | 8       | A    | 0           | 283415.175   | -0.017                     | 142.6258  |
| 21   | 14     | 8      | 20    | 13      | 7       | A    | 0           | 283415.175   | -0.017                     | 142.6258  |
| 46   | 10     | 36     | 45    | 11      | 35      | A    | 0           | 283443.886   | -0.041                     | 307.4948  |
| 46   | 10     | 36     | 45    | 11      | 35      | E    | 0           | 283461.000   | -0.004                     | 307.4996  |
| 49   | 6      | 43     | 48    | 6       | 42      | A    | 1           | 283512.652   | -0.044                     | 443.3908  |
| 49   | 6      | 43     | 48    | 7       | 42      | A    | 1           | 283512.652   | 0.087                      | 443.3908  |
| 49   | 7      | 43     | 48    | 6       | 42      | A    | 1           | 283512.652   | -0.112                     | 443.3908  |
| 49   | 7      | 43     | 48    | 7       | 42      | A    | 1           | 283512.652   | 0.019                      | 443.3908  |
| 48   | 7      | 41     | 47    | 8       | 40      | A    | 1           | 283555.700   | -0.037                     | 439.9827  |
| 48   | 8      | 41     | 47    | 8       | 40      | A    | 1           | 283557.921   | 0.014                      | 439.9827  |
| 48   | 7      | 41     | 47    | 7       | 40      | A    | 1           | 283559.761   | 0.010                      | 439.9826  |
| 48   | 8      | 41     | 47    | 7       | 40      | A    | 1           | 283561.916   | -0.006                     | 439.9826  |



| $J'$ | $K'_a$ | $K'_c$ | $J''$ | $K''_a$ | $K''_c$ | Sym. | $v_{tCH_3}$ | $\nu_{Obs.}$ | $\nu_{Obs.} - \nu_{Calc.}$ | $E_{low}$ |
|------|--------|--------|-------|---------|---------|------|-------------|--------------|----------------------------|-----------|
| 50   | 5      | 45     | 49    | 5       | 44      | A    | 1           | 283580.028   | -0.038                     | 446.3178  |
| 50   | 5      | 45     | 49    | 6       | 44      | A    | 1           | 283580.028   | -0.035                     | 446.3178  |
| 50   | 6      | 45     | 49    | 5       | 44      | A    | 1           | 283580.028   | -0.040                     | 446.3178  |
| 50   | 6      | 45     | 49    | 6       | 44      | A    | 1           | 283580.028   | -0.037                     | 446.3178  |
| 46   | 9      | 37     | 45    | 10      | 36      | E    | 0           | 283587.406   | -0.029                     | 303.0912  |
| 46   | 9      | 37     | 45    | 10      | 36      | A    | 0           | 283589.998   | -0.021                     | 303.0863  |
| 49   | 6      | 43     | 48    | 6       | 42      | E    | 1           | 283657.287   | -0.056                     | 443.2229  |
| 49   | 6      | 43     | 48    | 7       | 42      | E    | 1           | 283657.287   | 0.103                      | 443.2229  |
| 49   | 7      | 43     | 48    | 6       | 42      | E    | 1           | 283657.287   | -0.140                     | 443.2229  |
| 49   | 7      | 43     | 48    | 7       | 42      | E    | 1           | 283657.287   | 0.020                      | 443.2229  |
| 45   | 16     | 30     | 44    | 16      | 29      | A    | 0           | 283665.974   | -0.054                     | 321.2271  |
| 45   | 16     | 29     | 44    | 16      | 28      | E    | 0           | 283675.267   | -0.061                     | 321.2318  |
| 50   | 5      | 45     | 49    | 5       | 44      | E    | 1           | 283705.159   | -0.009                     | 446.1333  |
| 50   | 5      | 45     | 49    | 6       | 44      | E    | 1           | 283705.159   | -0.005                     | 446.1333  |
| 50   | 6      | 45     | 49    | 5       | 44      | E    | 1           | 283705.159   | -0.011                     | 446.1333  |
| 50   | 6      | 45     | 49    | 6       | 44      | E    | 1           | 283705.159   | -0.007                     | 446.1333  |
| 49   | 6      | 43     | 48    | 6       | 42      | E    | 0           | 283706.974   | -0.058                     | 314.9139  |
| 49   | 7      | 43     | 48    | 7       | 42      | E    | 0           | 283706.974   | 0.012                      | 314.9139  |
| 49   | 6      | 43     | 48    | 6       | 42      | A    | 0           | 283711.461   | -0.039                     | 314.9087  |
| 49   | 6      | 43     | 48    | 7       | 42      | A    | 0           | 283711.461   | 0.109                      | 314.9087  |
| 49   | 7      | 43     | 48    | 6       | 42      | A    | 0           | 283711.461   | -0.117                     | 314.9087  |
| 49   | 7      | 43     | 48    | 7       | 42      | A    | 0           | 283711.461   | 0.031                      | 314.9087  |
| 51   | 4      | 47     | 50    | 4       | 46      | A    | 1           | 283713.526   | -0.064                     | 448.7906  |
| 51   | 4      | 47     | 50    | 5       | 46      | A    | 1           | 283713.526   | -0.064                     | 448.7906  |
| 51   | 5      | 47     | 50    | 4       | 46      | A    | 1           | 283713.526   | -0.064                     | 448.7906  |
| 51   | 5      | 47     | 50    | 5       | 46      | A    | 1           | 283713.526   | -0.064                     | 448.7906  |
| 48   | 7      | 41     | 47    | 8       | 40      | E    | 1           | 283721.932   | 0.022                      | 439.8254  |
| 48   | 8      | 41     | 47    | 8       | 40      | E    | 1           | 283724.476   | -0.025                     | 439.8254  |
| 48   | 7      | 41     | 47    | 7       | 40      | E    | 1           | 283726.665   | -0.009                     | 439.8253  |
| 48   | 8      | 41     | 47    | 7       | 40      | E    | 1           | 283729.294   | 0.028                      | 439.8253  |
| 47   | 8      | 39     | 46    | 9       | 38      | A    | 1           | 283744.323   | 0.122                      | 436.0532  |
| 50   | 5      | 45     | 49    | 5       | 44      | E    | 0           | 283758.282   | -0.022                     | 317.8258  |
| 50   | 6      | 45     | 49    | 6       | 44      | E    | 0           | 283758.282   | -0.021                     | 317.8258  |
| 50   | 5      | 45     | 49    | 5       | 44      | A    | 0           | 283762.152   | -0.010                     | 317.8201  |
| 50   | 5      | 45     | 49    | 6       | 44      | A    | 0           | 283762.152   | -0.007                     | 317.8201  |
| 50   | 6      | 45     | 49    | 5       | 44      | A    | 0           | 283762.152   | -0.012                     | 317.8201  |
| 50   | 6      | 45     | 49    | 6       | 44      | A    | 0           | 283762.152   | -0.009                     | 317.8201  |
| 48   | 7      | 41     | 47    | 8       | 40      | E    | 0           | 283766.974   | -0.026                     | 311.5168  |
| 48   | 8      | 41     | 47    | 8       | 40      | E    | 0           | 283769.383   | -0.019                     | 311.5168  |
| 48   | 7      | 41     | 47    | 8       | 40      | A    | 0           | 283772.124   | -0.013                     | 311.5118  |
| 48   | 8      | 41     | 47    | 7       | 40      | A    | 0           | 283779.011   | 0.004                      | 311.5117  |
| 47   | 9      | 39     | 46    | 9       | 38      | A    | 1           | 283794.916   | 0.049                      | 436.0532  |
| 58   | 26     | 32     | 58    | 25      | 33      | A    | 0           | 283812.067   | -0.043                     | 539.4688  |
| 58   | 26     | 33     | 58    | 25      | 34      | A    | 0           | 283812.067   | -0.043                     | 539.4688  |
| 51   | 4      | 47     | 50    | 4       | 46      | E    | 1           | 283819.563   | -0.027                     | 448.5838  |
| 51   | 4      | 47     | 50    | 5       | 46      | E    | 1           | 283819.563   | -0.027                     | 448.5838  |
| 51   | 5      | 47     | 50    | 4       | 46      | E    | 1           | 283819.563   | -0.027                     | 448.5838  |
| 51   | 5      | 47     | 50    | 5       | 46      | E    | 1           | 283819.563   | -0.027                     | 448.5838  |
| 44   | 13     | 31     | 43    | 13      | 30      | A    | 0           | 283828.032   | -0.028                     | 296.9637  |
| 47   | 8      | 39     | 46    | 8       | 38      | A    | 1           | 283832.491   | 0.062                      | 436.0502  |
| 44   | 13     | 31     | 43    | 13      | 30      | E    | 0           | 283837.093   | 0.104                      | 296.9673  |
| 51   | 4      | 47     | 50    | 4       | 46      | E    | 0           | 283875.660   | 0.007                      | 320.2795  |
| 51   | 5      | 47     | 50    | 5       | 46      | E    | 0           | 283875.660   | 0.007                      | 320.2795  |
| 51   | 4      | 47     | 50    | 4       | 46      | A    | 0           | 283878.903   | -0.013                     | 320.2730  |
| 51   | 4      | 47     | 50    | 5       | 46      | A    | 0           | 283878.903   | -0.013                     | 320.2730  |
| 51   | 5      | 47     | 50    | 4       | 46      | A    | 0           | 283878.903   | -0.013                     | 320.2730  |
| 51   | 5      | 47     | 50    | 5       | 46      | A    | 0           | 283878.903   | -0.013                     | 320.2730  |
| 30   | 10     | 21     | 29    | 9       | 20      | E    | 0           | 283880.240   | 0.043                      | 173.5130  |
| 47   | 9      | 39     | 46    | 8       | 38      | A    | 1           | 283884.258   | 0.164                      | 436.0502  |
| 52   | 3      | 49     | 51    | 3       | 48      | A    | 1           | 283886.868   | -0.095                     | 450.8283  |
| 52   | 3      | 49     | 51    | 4       | 48      | A    | 1           | 283886.868   | -0.095                     | 450.8283  |
| 52   | 4      | 49     | 51    | 3       | 48      | A    | 1           | 283886.868   | -0.095                     | 450.8283  |
| 52   | 4      | 49     | 51    | 4       | 48      | A    | 1           | 283886.868   | -0.095                     | 450.8283  |
| 47   | 8      | 39     | 46    | 9       | 38      | E    | 1           | 283928.881   | -0.003                     | 435.9001  |
| 30   | 10     | 21     | 29    | 9       | 20      | A    | 0           | 283953.944   | -0.012                     | 173.5056  |
| 47   | 8      | 39     | 46    | 9       | 38      | E    | 0           | 283970.451   | -0.031                     | 307.5939  |
| 52   | 3      | 49     | 51    | 3       | 48      | E    | 1           | 283972.937   | -0.002                     | 450.5932  |
| 52   | 3      | 49     | 51    | 4       | 48      | E    | 1           | 283972.937   | -0.002                     | 450.5932  |
| 52   | 4      | 49     | 51    | 3       | 48      | E    | 1           | 283972.937   | -0.002                     | 450.5932  |
| 52   | 4      | 49     | 51    | 4       | 48      | E    | 1           | 283972.937   | -0.002                     | 450.5932  |
| 47   | 8      | 39     | 46    | 9       | 38      | A    | 0           | 283976.159   | -0.003                     | 307.5890  |
| 47   | 9      | 39     | 46    | 9       | 38      | E    | 1           | 283987.837   | -0.080                     | 435.9001  |
| 47   | 9      | 39     | 46    | 9       | 38      | E    | 0           | 284025.734   | 0.005                      | 307.5939  |
| 52   | 3      | 49     | 51    | 3       | 48      | E    | 0           | 284031.943   | 0.003                      | 322.2936  |
| 52   | 4      | 49     | 51    | 4       | 48      | E    | 0           | 284031.943   | 0.003                      | 322.2936  |
| 52   | 3      | 49     | 51    | 3       | 48      | A    | 0           | 284034.583   | 0.001                      | 322.2862  |
| 52   | 3      | 49     | 51    | 4       | 48      | A    | 0           | 284034.583   | 0.001                      | 322.2862  |
| 52   | 4      | 49     | 51    | 3       | 48      | A    | 0           | 284034.583   | 0.001                      | 322.2862  |
| 52   | 4      | 49     | 51    | 4       | 48      | A    | 0           | 284034.583   | 0.001                      | 322.2862  |
| 23   | 13     | 11     | 22    | 12      | 11      | E    | 0           | 284068.328   | 0.054                      | 146.7707  |
| 47   | 8      | 39     | 46    | 8       | 38      | A    | 0           | 284073.647   | 0.018                      | 307.5858  |
| 23   | 13     | 10     | 22    | 12      | 10      | E    | 0           | 284075.132   | -0.065                     | 146.7841  |
| 53   | 2      | 51     | 52    | 2       | 50      | A    | 1           | 284084.636   | -0.047                     | 452.4450  |
| 53   | 2      | 51     | 52    | 3       | 50      | A    | 1           | 284084.636   | -0.047                     | 452.4450  |
| 53   | 3      | 51     | 52    | 2       | 50      | A    | 1           | 284084.636   | -0.047                     | 452.4450  |
| 53   | 3      | 51     | 52    | 3       | 50      | A    | 1           | 284084.636   | -0.047                     | 452.4450  |
| 47   | 9      | 39     | 46    | 8       | 38      | E    | 1           | 284091.267   | 0.019                      | 435.8966  |
| 23   | 13     | 11     | 22    | 12      | 10      | A    | 0           | 284112.751   | 0.138                      | 146.7750  |
| 23   | 13     | 10     | 22    | 12      | 11      | A    | 0           | 284112.751   | 0.133                      | 146.7750  |
| 47   | 9      | 39     | 46    | 8       | 38      | E    | 0           | 284122.659   | -0.055                     | 307.5906  |
| 47   | 9      | 39     | 46    | 8       | 38      | A    | 0           | 284129.124   | -0.037                     | 307.5858  |
| 53   | 2      | 51     | 52    | 2       | 50      | E    | 1           | 284148.636   | -0.003                     | 452.1749  |
| 53   | 3      | 51     | 52    | 3       | 50      | E    | 1           | 284148.636   | -0.003                     | 452.1749  |
| 29   | 10     | 19     | 28    | 9       | 20      | A    | 0           | 284206.815   | -0.014                     | 167.1879  |
| 53   | 2      | 51     | 52    | 2       | 50      | E    | 0           | 284210.991   | 0.007                      | 323.8818  |
| 53   | 3      | 51     | 52    | 3       | 50      | E    | 0           | 284210.991   | 0.007                      | 323.8818  |
| 53   | 2      | 51     | 52    | 2       | 50      | A    | 0           | 284212.947   | 0.001                      | 323.8734  |
| 53   | 2      | 51     | 52    | 3       | 50      | A    | 0           | 284212.947   | 0.001                      | 323.8734  |
| 53   | 3      | 51     | 52    | 2       | 50      | A    | 0           | 284212.947   | 0.001                      | 323.8734  |
| 53   | 3      | 51     | 52    | 3       | 50      | A    | 0           | 284212.947   | 0.001                      | 323.8734  |
| 29   | 10     | 19     | 28    | 9       | 20      | E    | 0           | 284219.777   | -0.056                     | 167.1944  |
| 27   | 11     | 17     | 26    | 10      | 16      | A    | 0           | 284265.561   | -0.029                     | 158.9871  |
| 27   | 11     | 17     | 26    | 10      | 17      | E    | 0           | 284272.524   | -0.004                     | 158.9848  |
| 27   | 11     | 16     | 26    | 10      | 16      | E    | 0           | 284282.680   | -0.053                     | 158.9971  |
| 54   | 1      | 53     | 53    | 1       | 52      | A    | 1           | 284297.288   | 0.007                      | 453.6513  |
| 54   | 1      | 53     | 53    | 2       | 52      | A    | 1           | 284297.288   | 0.007                      | 453.6513  |
| 54   | 2      | 53     | 53    | 1       | 52      | A    | 1           | 284297.288   | 0.007                      | 453.6513  |
| 54   | 2      | 53     | 53    | 2       | 52      | A    | 1           | 284297.288   | 0.007                      | 453.6513  |
| 57   | 26     | 31     | 57    | 25      | 32      | E    | 0           | 284316.550   | -0.100                     | 527.3889  |
| 54   | 2      | 53     | 53    | 2       | 52      | E    | 1           | 284336.260   | 0.025                      | 453.3393  |
| 45   | 11     | 35     | 44    | 11      | 34      | E    | 0           | 284346.720   | 0.066                      | 298.0148  |
| 45   | 11     | 35     | 44    | 11      | 34      | A    | 0           | 284351.098   | -0.006                     | 298.0099  |
| 57   | 26     | 31     | 57    | 25      | 32      | A    | 0           | 284352.550   | -0.017                     | 527.3972  |
| 57   | 26     | 32     | 57    | 25      | 33      | A    | 0           | 284352.550   | -0.017                     | 527.3972  |
| 57   | 26     | 32     | 57    | 25      | 33      | E    | 0           | 284361.238   | -0.009                     | 527.3848  |
| 27   | 11     | 16     | 26    | 10      | 17      | A    | 0           | 284368.178   | -0.002                     | 158.9842  |



| $J'$ | $K'_a$ | $K'_c$ | $J''$ | $K''_a$ | $K''_c$ | Sym. | $v_{tCH_3}$ | $\nu_{Obs.}$ | $\nu_{Obs.} - \nu_{Calc.}$ | $E_{low}$ |
|------|--------|--------|-------|---------|---------|------|-------------|--------------|----------------------------|-----------|
| 70   | 8      | 62     | 70    | 7       | 63      | E    | 1           | 284372.043   | 0.223                      | 700.5458  |
| 70   | 9      | 62     | 70    | 8       | 63      | E    | 1           | 284372.043   | 0.223                      | 700.5458  |
| 54   | 1      | 53     | 53    | 1       | 52      | E    | 0           | 284402.647   | -0.025                     | 325.0546  |
| 54   | 2      | 53     | 53    | 2       | 52      | E    | 0           | 284402.647   | -0.025                     | 325.0546  |
| 54   | 1      | 53     | 53    | 1       | 52      | A    | 0           | 284403.899   | 0.031                      | 325.0449  |
| 54   | 1      | 53     | 53    | 2       | 52      | A    | 0           | 284403.899   | 0.031                      | 325.0449  |
| 54   | 2      | 53     | 53    | 1       | 52      | A    | 0           | 284403.899   | 0.031                      | 325.0449  |
| 54   | 2      | 53     | 53    | 2       | 52      | A    | 0           | 284403.899   | 0.031                      | 325.0449  |
| 46   | 10     | 37     | 45    | 10      | 36      | E    | 1           | 284457.001   | -0.053                     | 431.3927  |
| 46   | 10     | 37     | 45    | 10      | 36      | E    | 0           | 284489.296   | -0.021                     | 303.0912  |
| 25   | 12     | 14     | 24    | 11      | 14      | E    | 0           | 284491.789   | 0.012                      | 152.2054  |
| 46   | 10     | 37     | 45    | 10      | 36      | A    | 0           | 284495.822   | 0.010                      | 303.0863  |
| 35   | 10     | 26     | 34    | 9       | 25      | E    | 0           | 284499.780   | -0.073                     | 208.4882  |
| 25   | 12     | 13     | 24    | 11      | 13      | E    | 0           | 284504.981   | -0.055                     | 152.2183  |
| 70   | 8      | 62     | 70    | 7       | 63      | A    | 0           | 284507.388   | 0.175                      | 572.2910  |
| 70   | 9      | 62     | 70    | 8       | 63      | A    | 0           | 284507.388   | 0.175                      | 572.2910  |
| 55   | 0      | 55     | 54    | 0       | 54      | A    | 1           | 284519.042   | 0.136                      | 454.4560  |
| 55   | 0      | 55     | 54    | 1       | 54      | A    | 1           | 284519.042   | 0.136                      | 454.4560  |
| 55   | 1      | 55     | 54    | 0       | 54      | A    | 1           | 284519.042   | 0.136                      | 454.4560  |
| 55   | 1      | 55     | 54    | 1       | 54      | A    | 1           | 284519.042   | 0.136                      | 454.4560  |
| 55   | 0      | 55     | 54    | 0       | 54      | E    | 1           | 284528.887   | 0.018                      | 454.0939  |
| 55   | 1      | 55     | 54    | 1       | 54      | E    | 1           | 284528.887   | 0.018                      | 454.0939  |
| 25   | 12     | 14     | 24    | 11      | 13      | A    | 0           | 284537.940   | -0.057                     | 152.2080  |
| 25   | 12     | 13     | 24    | 11      | 14      | A    | 0           | 284539.085   | -0.047                     | 152.2080  |
| 35   | 10     | 26     | 34    | 9       | 25      | A    | 0           | 284575.369   | 0.002                      | 208.4797  |
| 55   | 0      | 55     | 54    | 0       | 54      | A    | 0           | 284600.643   | -0.160                     | 325.8087  |
| 55   | 0      | 55     | 54    | 1       | 54      | A    | 0           | 284600.643   | -0.160                     | 325.8087  |
| 55   | 1      | 55     | 54    | 0       | 54      | A    | 0           | 284600.643   | -0.160                     | 325.8087  |
| 55   | 1      | 55     | 54    | 1       | 54      | A    | 0           | 284600.643   | -0.160                     | 325.8087  |
| 55   | 0      | 55     | 54    | 0       | 54      | E    | 0           | 284600.643   | 0.155                      | 325.8200  |
| 55   | 1      | 55     | 54    | 1       | 54      | E    | 0           | 284600.643   | 0.155                      | 325.8200  |
| 44   | 10     | 34     | 43    | 10      | 33      | E    | 0           | 284721.496   | -0.023                     | 288.0545  |
| 44   | 10     | 34     | 43    | 10      | 33      | A    | 0           | 284736.716   | -0.027                     | 288.0478  |
| 56   | 26     | 30     | 56    | 25      | 31      | E    | 0           | 284827.111   | -0.023                     | 515.5330  |
| 56   | 26     | 30     | 56    | 25      | 31      | A    | 0           | 284862.710   | -0.065                     | 515.5414  |
| 56   | 26     | 31     | 56    | 25      | 32      | E    | 0           | 284862.710   | -0.065                     | 515.5414  |
| 56   | 26     | 31     | 56    | 25      | 32      | A    | 0           | 284871.858   | -0.064                     | 515.5289  |
| 65   | 5      | 60     | 65    | 4       | 61      | A    | 0           | 284911.556   | 0.204                      | 480.2527  |
| 65   | 6      | 60     | 65    | 5       | 61      | A    | 0           | 284911.556   | 0.204                      | 480.2527  |
| 45   | 15     | 31     | 44    | 15      | 30      | E    | 0           | 284974.981   | -0.038                     | 315.7270  |
| 45   | 15     | 31     | 44    | 15      | 30      | E    | 0           | 285013.235   | -0.014                     | 315.7223  |
| 45   | 15     | 30     | 44    | 15      | 29      | E    | 0           | 285060.063   | -0.030                     | 315.7355  |
| 46   | 9      | 37     | 45    | 9       | 36      | E    | 1           | 285066.303   | 0.035                      | 431.3406  |
| 46   | 9      | 37     | 45    | 9       | 36      | E    | 0           | 285070.319   | -0.102                     | 303.0417  |
| 46   | 9      | 37     | 45    | 9       | 36      | A    | 0           | 285079.162   | 0.027                      | 303.0366  |
| 45   | 15     | 30     | 44    | 15      | 29      | E    | 0           | 285087.849   | -0.079                     | 315.7313  |
| 55   | 26     | 29     | 55    | 25      | 30      | E    | 0           | 285308.756   | -0.057                     | 503.8925  |
| 55   | 26     | 29     | 55    | 25      | 30      | A    | 0           | 285344.162   | -0.028                     | 503.9010  |
| 55   | 26     | 30     | 55    | 25      | 31      | A    | 0           | 285344.162   | -0.028                     | 503.9010  |
| 46   | 24     | 22     | 45    | 24      | 21      | A    | 0           | 285352.526   | -0.067                     | 390.0109  |
| 46   | 24     | 23     | 45    | 24      | 22      | A    | 0           | 285352.526   | -0.067                     | 390.0109  |
| 43   | 11     | 32     | 42    | 11      | 31      | A    | 0           | 285681.069   | -0.112                     | 281.1995  |
| 43   | 11     | 32     | 42    | 11      | 31      | E    | 0           | 285683.219   | -0.012                     | 281.2068  |
| 46   | 23     | 24     | 45    | 23      | 23      | A    | 0           | 285685.165   | -0.029                     | 381.1643  |
| 46   | 23     | 23     | 45    | 23      | 22      | A    | 0           | 285685.165   | -0.029                     | 381.1643  |
| 54   | 26     | 28     | 54    | 25      | 29      | E    | 0           | 285763.010   | -0.053                     | 492.4669  |
| 54   | 26     | 28     | 54    | 25      | 29      | A    | 0           | 285798.191   | 0.003                      | 492.4755  |
| 54   | 26     | 29     | 54    | 25      | 30      | A    | 0           | 285798.191   | 0.003                      | 492.4755  |
| 54   | 26     | 29     | 54    | 25      | 30      | E    | 0           | 285808.111   | -0.079                     | 492.4629  |
| 62   | 4      | 59     | 62    | 3       | 60      | E    | 0           | 285830.102   | 0.126                      | 426.3781  |
| 46   | 10     | 37     | 45    | 9       | 36      | E    | 0           | 285972.291   | -0.012                     | 303.0417  |
| 62   | 3      | 59     | 62    | 2       | 60      | E    | 1           | 285978.103   | -0.236                     | 554.6481  |
| 62   | 4      | 59     | 62    | 3       | 60      | E    | 1           | 285978.103   | -0.236                     | 554.6481  |
| 46   | 10     | 37     | 45    | 9       | 36      | A    | 0           | 285984.923   | -0.004                     | 303.0366  |
| 46   | 22     | 24     | 45    | 22      | 23      | A    | 0           | 286066.377   | -0.034                     | 372.7159  |
| 46   | 22     | 25     | 45    | 22      | 24      | A    | 0           | 286066.377   | -0.034                     | 372.7159  |
| 46   | 22     | 25     | 45    | 22      | 24      | E    | 0           | 286068.363   | 0.039                      | 372.7028  |
| 53   | 26     | 27     | 53    | 25      | 28      | E    | 0           | 286191.134   | -0.057                     | 481.2559  |
| 53   | 26     | 27     | 53    | 25      | 28      | A    | 0           | 286226.049   | -0.027                     | 481.2645  |
| 53   | 26     | 28     | 53    | 25      | 29      | A    | 0           | 286226.049   | -0.027                     | 481.2645  |
| 53   | 26     | 28     | 53    | 25      | 29      | E    | 0           | 286236.451   | -0.018                     | 481.2519  |
| 31   | 10     | 22     | 30    | 9       | 21      | E    | 0           | 286496.706   | -0.028                     | 179.9826  |
| 46   | 21     | 26     | 45    | 21      | 25      | A    | 0           | 286507.289   | -0.029                     | 364.6691  |
| 46   | 21     | 25     | 45    | 21      | 24      | A    | 0           | 286507.289   | -0.029                     | 364.6691  |
| 46   | 21     | 25     | 45    | 21      | 24      | E    | 0           | 286509.575   | -0.014                     | 364.6655  |
| 45   | 14     | 32     | 44    | 14      | 31      | A    | 0           | 286523.296   | -0.043                     | 310.7139  |
| 45   | 14     | 32     | 44    | 14      | 31      | E    | 0           | 286541.069   | -0.005                     | 310.7143  |
| 31   | 10     | 22     | 30    | 9       | 21      | A    | 0           | 286563.906   | -0.009                     | 179.9750  |
| 67   | 6      | 61     | 67    | 5       | 62      | E    | 1           | 286592.260   | -0.173                     | 642.5917  |
| 67   | 7      | 61     | 67    | 6       | 62      | E    | 1           | 286592.260   | -0.173                     | 642.5917  |
| 52   | 26     | 26     | 52    | 25      | 27      | E    | 0           | 286594.335   | -0.099                     | 470.2589  |
| 52   | 26     | 26     | 52    | 25      | 27      | A    | 0           | 286629.082   | -0.011                     | 470.2677  |
| 52   | 26     | 27     | 52    | 25      | 28      | A    | 0           | 286629.082   | -0.011                     | 470.2677  |
| 67   | 6      | 61     | 67    | 5       | 62      | A    | 0           | 286638.089   | -0.057                     | 514.3225  |
| 67   | 7      | 61     | 67    | 6       | 62      | A    | 0           | 286638.089   | -0.057                     | 514.3225  |
| 52   | 26     | 27     | 52    | 25      | 28      | E    | 0           | 286639.829   | -0.023                     | 470.2549  |
| 34   | 10     | 25     | 33    | 9       | 24      | E    | 0           | 286745.498   | -0.085                     | 200.9766  |
| 34   | 10     | 25     | 33    | 9       | 24      | A    | 0           | 286818.774   | 0.034                      | 200.9683  |
| 64   | 4      | 60     | 64    | 3       | 61      | A    | 1           | 286820.995   | 0.168                      | 587.2610  |
| 64   | 5      | 60     | 64    | 4       | 61      | A    | 1           | 286820.995   | 0.168                      | 587.2610  |
| 51   | 26     | 25     | 51    | 25      | 26      | E    | 0           | 286973.911   | -0.062                     | 459.4757  |
| 51   | 26     | 25     | 51    | 25      | 26      | A    | 0           | 287008.383   | -0.032                     | 459.4845  |
| 51   | 26     | 26     | 51    | 25      | 27      | A    | 0           | 287008.383   | -0.032                     | 459.4845  |
| 51   | 26     | 26     | 51    | 25      | 27      | E    | 0           | 287019.526   | 0.006                      | 459.4717  |
| 46   | 20     | 26     | 45    | 20      | 25      | A    | 0           | 287022.671   | -0.009                     | 357.0286  |
| 46   | 20     | 27     | 45    | 20      | 26      | A    | 0           | 287022.671   | -0.009                     | 357.0286  |
| 46   | 20     | 26     | 45    | 20      | 25      | E    | 0           | 287025.295   | 0.177                      | 357.0266  |
| 50   | 26     | 24     | 50    | 25      | 25      | E    | 0           | 287330.856   | -0.073                     | 448.9057  |
| 45   | 14     | 31     | 44    | 14      | 30      | E    | 0           | 287337.412   | 0.067                      | 310.7536  |
| 45   | 14     | 31     | 44    | 14      | 30      | A    | 0           | 287341.758   | -0.015                     | 310.7511  |
| 50   | 26     | 24     | 50    | 25      | 25      | A    | 0           | 287365.125   | -0.040                     | 448.9147  |
| 50   | 26     | 25     | 50    | 25      | 26      | A    | 0           | 287365.125   | -0.040                     | 448.9147  |
| 45   | 12     | 34     | 44    | 12      | 33      | A    | 0           | 287369.192   | 0.033                      | 302.0459  |
| 45   | 12     | 34     | 44    | 12      | 33      | E    | 0           | 287369.192   | -0.098                     | 302.0501  |
| 50   | 26     | 25     | 50    | 25      | 26      | E    | 0           | 287376.555   | -0.041                     | 448.9018  |
| 46   | 19     | 28     | 45    | 19      | 27      | A    | 0           | 287632.725   | -0.039                     | 349.8004  |
| 46   | 19     | 27     | 45    | 19      | 26      | E    | 0           | 287635.216   | -0.159                     | 349.8000  |
| 49   | 26     | 23     | 49    | 25      | 24      | E    | 0           | 287666.337   | -0.033                     | 438.5488  |
| 49   | 26     | 23     | 49    | 25      | 24      | A    | 0           | 287700.375   | -0.036                     | 438.5578  |
| 49   | 26     | 24     | 49    | 25      | 25      | A    | 0           | 287700.375   | -0.036                     | 438.5578  |
| 49   | 26     | 24     | 49    | 25      | 25      | E    | 0           | 287712.121   | -0.025                     | 438.5449  |
| 45   | 13     | 33     | 44    | 13      | 32      | A    | 0           | 287768.185   | -0.015                     | 306.1890  |
| 45   | 13     | 33     | 44    | 13      | 32      | E    | 0           | 287773.695   | -0.035                     | 306.1919  |
| 70   | 27     | 43     | 70    | 26      | 44      | E    | 0           | 287775.702   | -0.117                     | 710.4920  |
| 70   | 27     | 44     | 70    | 26      | 45      | A    | 0           | 287812.153   | 0.016                      | 710.4996  |
| 18   | 16     | 2      | 17    | 15      | 2       | E    | 0           | 287846.382   | -0.062                     | 141.5554  |



| $J'$ | $K'_a$ | $K'_c$ | $J''$ | $K''_a$ | $K''_c$ | Sym. | $v_{tCH_3}$ | $\nu_{Obs.}$ | $\nu_{Obs.} - \nu_{Calc.}$ | $E_{low}$ |
|------|--------|--------|-------|---------|---------|------|-------------|--------------|----------------------------|-----------|
| 18   | 16     | 3      | 17    | 15      | 3       | E    | 0           | 287856.609   | 0.024                      | 141.5418  |
| 32   | 10     | 23     | 31    | 9       | 22      | E    | 0           | 287890.260   | 0.035                      | 186.7160  |
| 18   | 16     | 2      | 17    | 15      | 3       | A    | 0           | 287891.699   | -0.018                     | 141.5505  |
| 18   | 16     | 3      | 17    | 15      | 2       | A    | 0           | 287891.699   | -0.018                     | 141.5505  |
| 33   | 10     | 24     | 32    | 9       | 23      | E    | 0           | 287953.136   | -0.017                     | 193.7155  |
| 64   | 4      | 60     | 64    | 3       | 61      | A    | 0           | 287955.010   | 0.042                      | 458.7861  |
| 64   | 5      | 60     | 64    | 4       | 61      | A    | 0           | 287955.010   | 0.042                      | 458.7861  |
| 32   | 10     | 23     | 31    | 9       | 22      | A    | 0           | 287957.223   | 0.013                      | 186.7082  |
| 48   | 26     | 22     | 48    | 25      | 23      | E    | 0           | 287981.266   | -0.053                     | 428.4044  |
| 64   | 4      | 60     | 64    | 3       | 61      | E    | 1           | 288008.362   | -0.258                     | 587.0621  |
| 64   | 5      | 60     | 64    | 4       | 61      | E    | 1           | 288008.362   | -0.258                     | 587.0621  |
| 48   | 26     | 22     | 48    | 25      | 23      | A    | 0           | 288015.141   | -0.033                     | 428.4135  |
| 48   | 26     | 23     | 48    | 25      | 24      | A    | 0           | 288015.141   | -0.033                     | 428.4135  |
| 33   | 10     | 24     | 32    | 9       | 23      | A    | 0           | 288022.928   | 0.001                      | 193.7074  |
| 48   | 26     | 23     | 48    | 25      | 24      | E    | 0           | 288027.205   | 0.009                      | 428.4006  |
| 69   | 7      | 62     | 69    | 6       | 63      | E    | 1           | 288087.961   | 0.016                      | 677.7262  |
| 69   | 8      | 62     | 69    | 7       | 63      | E    | 1           | 288087.961   | 0.016                      | 677.7262  |
| 69   | 7      | 62     | 69    | 6       | 63      | A    | 0           | 288181.253   | -0.105                     | 549.4650  |
| 69   | 8      | 62     | 69    | 7       | 63      | A    | 0           | 288181.253   | -0.105                     | 549.4650  |
| 47   | 26     | 21     | 47    | 25      | 22      | E    | 0           | 288276.716   | -0.034                     | 418.4723  |
| 47   | 26     | 21     | 47    | 25      | 22      | A    | 0           | 288310.402   | -0.028                     | 418.4814  |
| 47   | 26     | 22     | 47    | 25      | 23      | A    | 0           | 288310.402   | -0.028                     | 418.4814  |
| 47   | 26     | 22     | 47    | 25      | 23      | E    | 0           | 288322.704   | -0.015                     | 418.4685  |
| 55   | 14     | 41     | 54    | 15      | 40      | E    | 0           | 288348.061   | -0.006                     | 421.0877  |
| 46   | 18     | 29     | 45    | 18      | 28      | A    | 0           | 288366.447   | 0.030                      | 342.9927  |
| 46   | 18     | 28     | 45    | 18      | 27      | E    | 0           | 288369.278   | 0.002                      | 342.9940  |
| 46   | 18     | 29     | 45    | 18      | 28      | E    | 0           | 288370.574   | -0.038                     | 342.9822  |
| 46   | 26     | 20     | 46    | 25      | 21      | E    | 0           | 288553.567   | -0.032                     | 408.7521  |
| 46   | 26     | 20     | 46    | 25      | 21      | A    | 0           | 288587.084   | -0.029                     | 408.7613  |
| 46   | 26     | 21     | 46    | 25      | 22      | A    | 0           | 288587.084   | -0.029                     | 408.7613  |
| 46   | 26     | 21     | 46    | 25      | 22      | E    | 0           | 288599.649   | -0.002                     | 408.7483  |
| 50   | 6      | 44     | 49    | 6       | 43      | A    | 1           | 288621.161   | -0.030                     | 452.8477  |
| 50   | 6      | 44     | 49    | 7       | 43      | A    | 1           | 288621.161   | 0.038                      | 452.8477  |
| 50   | 7      | 44     | 49    | 6       | 43      | A    | 1           | 288621.161   | -0.065                     | 452.8477  |
| 50   | 7      | 44     | 49    | 7       | 43      | A    | 1           | 288621.161   | 0.003                      | 452.8477  |
| 49   | 7      | 42     | 48    | 8       | 41      | A    | 1           | 288647.705   | 0.080                      | 449.4412  |
| 49   | 8      | 42     | 48    | 8       | 41      | A    | 1           | 288648.833   | 0.042                      | 449.4412  |
| 49   | 7      | 42     | 48    | 7       | 41      | A    | 1           | 288649.794   | -0.001                     | 449.4411  |
| 49   | 8      | 42     | 48    | 7       | 41      | A    | 1           | 288651.047   | 0.007                      | 449.4411  |
| 69   | 27     | 42     | 69    | 26      | 43      | E    | 0           | 288690.125   | -0.097                     | 695.8237  |
| 51   | 5      | 46     | 50    | 5       | 45      | A    | 1           | 288697.338   | -0.022                     | 455.7770  |
| 51   | 5      | 46     | 50    | 6       | 45      | A    | 1           | 288697.338   | -0.020                     | 455.7770  |
| 51   | 6      | 46     | 50    | 5       | 45      | A    | 1           | 288697.338   | -0.023                     | 455.7770  |
| 51   | 6      | 46     | 50    | 6       | 45      | A    | 1           | 288697.338   | -0.021                     | 455.7770  |
| 20   | 15     | 6      | 19    | 14      | 6       | E    | 0           | 288701.268   | 0.037                      | 143.6288  |
| 61   | 2      | 59     | 61    | 1       | 60      | E    | 1           | 288719.167   | -0.112                     | 534.0011  |
| 61   | 3      | 59     | 61    | 2       | 60      | E    | 1           | 288719.167   | -0.112                     | 534.0011  |
| 69   | 27     | 43     | 69    | 26      | 44      | A    | 0           | 288726.054   | -0.002                     | 695.8315  |
| 69   | 27     | 43     | 69    | 26      | 44      | E    | 0           | 288733.314   | -0.263                     | 695.8205  |
| 20   | 15     | 6      | 19    | 14      | 5       | A    | 0           | 288739.869   | -0.018                     | 143.6361  |
| 20   | 15     | 5      | 19    | 14      | 6       | A    | 0           | 288739.869   | -0.018                     | 143.6361  |
| 50   | 6      | 44     | 49    | 6       | 43      | E    | 1           | 288764.072   | -0.032                     | 452.6847  |
| 50   | 6      | 44     | 49    | 7       | 43      | E    | 1           | 288764.072   | 0.052                      | 452.6847  |
| 50   | 7      | 44     | 49    | 6       | 43      | E    | 1           | 288764.072   | -0.075                     | 452.6847  |
| 50   | 7      | 44     | 49    | 7       | 43      | E    | 1           | 288764.072   | 0.008                      | 452.6847  |
| 45   | 10     | 35     | 44    | 10      | 34      | E    | 0           | 288787.127   | 0.021                      | 297.5518  |
| 45   | 10     | 35     | 44    | 10      | 34      | A    | 0           | 288802.545   | 0.210                      | 297.5455  |
| 49   | 7      | 42     | 48    | 8       | 41      | E    | 1           | 288811.326   | 0.025                      | 449.2895  |
| 49   | 7      | 42     | 48    | 7       | 41      | E    | 1           | 288813.991   | 0.099                      | 449.2894  |
| 50   | 6      | 44     | 49    | 6       | 43      | E    | 0           | 288816.024   | -0.011                     | 324.3774  |
| 50   | 7      | 44     | 49    | 7       | 43      | E    | 0           | 288816.024   | 0.026                      | 324.3774  |
| 50   | 6      | 44     | 49    | 6       | 43      | A    | 0           | 288820.357   | -0.093                     | 324.3723  |
| 50   | 6      | 44     | 49    | 7       | 43      | A    | 0           | 288820.357   | -0.016                     | 324.3723  |
| 50   | 7      | 44     | 49    | 6       | 43      | A    | 0           | 288820.357   | -0.133                     | 324.3723  |
| 50   | 7      | 44     | 49    | 7       | 43      | A    | 0           | 288820.357   | -0.056                     | 324.3723  |
| 51   | 5      | 46     | 50    | 5       | 45      | E    | 1           | 288821.495   | 0.143                      | 455.5967  |
| 51   | 5      | 46     | 50    | 6       | 45      | E    | 1           | 288821.495   | 0.145                      | 455.5967  |
| 51   | 6      | 46     | 50    | 5       | 45      | E    | 1           | 288821.495   | 0.142                      | 455.5967  |
| 51   | 6      | 46     | 50    | 6       | 45      | E    | 1           | 288821.495   | 0.144                      | 455.5967  |
| 48   | 8      | 40     | 47    | 9       | 39      | A    | 1           | 288825.483   | 0.053                      | 445.5196  |
| 52   | 4      | 48     | 51    | 4       | 47      | A    | 1           | 288835.119   | -0.097                     | 458.2543  |
| 52   | 4      | 48     | 51    | 5       | 47      | A    | 1           | 288835.119   | -0.097                     | 458.2543  |
| 52   | 5      | 48     | 51    | 4       | 47      | A    | 1           | 288835.119   | -0.097                     | 458.2543  |
| 52   | 5      | 48     | 51    | 5       | 47      | A    | 1           | 288835.119   | -0.097                     | 458.2543  |
| 45   | 26     | 19     | 45    | 25      | 20      | A    | 0           | 288846.063   | -0.052                     | 399.2527  |
| 45   | 26     | 20     | 45    | 25      | 21      | A    | 0           | 288846.063   | -0.052                     | 399.2527  |
| 48   | 9      | 40     | 47    | 9       | 39      | A    | 1           | 288854.013   | 0.066                      | 445.5196  |
| 45   | 26     | 20     | 45    | 25      | 21      | E    | 0           | 288858.927   | 0.040                      | 399.2397  |
| 49   | 7      | 42     | 48    | 8       | 41      | A    | 0           | 288864.000   | -0.020                     | 320.9775  |
| 49   | 8      | 42     | 48    | 8       | 41      | A    | 0           | 288865.284   | -0.038                     | 320.9775  |
| 49   | 7      | 42     | 48    | 7       | 41      | A    | 0           | 288866.459   | 0.023                      | 320.9775  |
| 49   | 8      | 42     | 48    | 7       | 41      | A    | 0           | 288867.734   | -0.005                     | 320.9775  |
| 51   | 5      | 46     | 50    | 5       | 45      | E    | 0           | 288876.442   | -0.017                     | 327.2910  |
| 51   | 6      | 46     | 50    | 6       | 45      | E    | 0           | 288876.442   | -0.016                     | 327.2910  |
| 51   | 5      | 46     | 50    | 5       | 45      | A    | 0           | 288880.280   | -0.004                     | 327.2853  |
| 51   | 5      | 46     | 50    | 6       | 45      | A    | 0           | 288880.280   | -0.002                     | 327.2853  |
| 51   | 6      | 46     | 50    | 5       | 45      | A    | 0           | 288880.280   | -0.005                     | 327.2853  |
| 51   | 6      | 46     | 50    | 6       | 45      | A    | 0           | 288880.280   | -0.003                     | 327.2853  |
| 48   | 9      | 40     | 47    | 8       | 39      | A    | 1           | 288904.712   | 0.099                      | 445.5179  |
| 52   | 4      | 48     | 51    | 4       | 47      | E    | 1           | 288940.503   | -0.023                     | 458.0510  |
| 52   | 4      | 48     | 51    | 5       | 47      | E    | 1           | 288940.503   | -0.023                     | 458.0510  |
| 52   | 5      | 48     | 51    | 4       | 47      | E    | 1           | 288940.503   | -0.023                     | 458.0510  |
| 52   | 5      | 48     | 51    | 5       | 47      | E    | 1           | 288940.503   | -0.023                     | 458.0510  |
| 52   | 4      | 48     | 51    | 4       | 47      | E    | 0           | 288998.361   | -0.006                     | 329.7485  |
| 52   | 5      | 48     | 51    | 5       | 47      | E    | 0           | 288998.361   | -0.006                     | 329.7485  |
| 52   | 4      | 48     | 51    | 4       | 47      | A    | 0           | 289001.650   | 0.041                      | 329.7422  |
| 52   | 4      | 48     | 51    | 5       | 47      | A    | 0           | 289001.650   | 0.041                      | 329.7422  |
| 52   | 5      | 48     | 51    | 4       | 47      | A    | 0           | 289001.650   | 0.040                      | 329.7422  |
| 52   | 5      | 48     | 51    | 5       | 47      | A    | 0           | 289001.650   | 0.041                      | 329.7422  |
| 47   | 9      | 38     | 46    | 10      | 37      | E    | 0           | 289001.650   | -0.381                     | 312.5807  |
| 47   | 9      | 38     | 46    | 10      | 37      | A    | 0           | 289006.118   | -0.006                     | 312.5761  |
| 53   | 3      | 50     | 52    | 3       | 49      | A    | 1           | 289010.607   | -0.070                     | 460.2978  |
| 53   | 3      | 50     | 52    | 4       | 49      | A    | 1           | 289010.607   | -0.070                     | 460.2978  |
| 53   | 4      | 50     | 52    | 3       | 49      | A    | 1           | 289010.607   | -0.070                     | 460.2978  |
| 53   | 4      | 50     | 52    | 4       | 49      | A    | 1           | 289010.607   | -0.070                     | 460.2978  |
| 48   | 9      | 40     | 47    | 9       | 39      | E    | 1           | 289043.309   | 0.007                      | 445.3729  |
| 48   | 8      | 40     | 47    | 9       | 39      | E    | 0           | 289053.012   | -0.007                     | 317.0679  |
| 44   | 26     | 18     | 44    | 25      | 19      | E    | 0           | 289055.133   | 0.045                      | 389.9461  |
| 48   | 8      | 40     | 47    | 9       | 39      | A    | 0           | 289058.681   | -0.027                     | 317.0633  |
| 48   | 8      | 40     | 47    | 8       | 39      | E    | 1           | 289068.878   | -0.027                     | 445.3709  |
| 48   | 9      | 40     | 47    | 9       | 39      | E    | 0           | 289084.208   | -0.007                     | 317.0679  |
| 44   | 26     | 18     | 44    | 25      | 19      | A    | 0           | 289088.253   | -0.043                     | 389.9554  |
| 44   | 26     | 19     | 44    | 25      | 20      | A    | 0           | 289088.253   | -0.043                     | 389.9554  |
| 48   | 9      | 40     | 47    | 9       | 39      | A    | 0           | 289090.091   | 0.020                      | 317.0633  |
| 53   | 3      | 50     | 52    | 3       | 49      | E    | 1           | 289096.261   | 0.004                      | 460.0655  |
| 53   | 3      | 50     | 52    | 4       | 49      | E    | 1           | 289096.261   | 0.004                      | 460.0655  |



| $J'$ | $K'_a$ | $K'_c$ | $J''$ | $K''_a$ | $K''_c$ | Sym. | $v_{tCH_3}$ | $\nu_{Obs.}$ | $\nu_{Obs.} - \nu_{Calc.}$ | $E_{low}$ |
|------|--------|--------|-------|---------|---------|------|-------------|--------------|----------------------------|-----------|
| 53   | 4      | 50     | 52    | 3       | 49      | E    | 1           | 289096.261   | 0.004                      | 460.0655  |
| 53   | 4      | 50     | 52    | 4       | 49      | E    | 1           | 289096.261   | 0.004                      | 460.0655  |
| 44   | 26     | 19     | 44    | 25      | 20      | E    | 0           | 289101.215   | -0.070                     | 389.9423  |
| 48   | 9      | 40     | 47    | 8       | 39      | E    | 1           | 289102.384   | 0.049                      | 445.3709  |
| 48   | 8      | 40     | 47    | 8       | 39      | E    | 0           | 289108.275   | 0.009                      | 317.0661  |
| 48   | 8      | 40     | 47    | 8       | 39      | A    | 0           | 289114.166   | -0.074                     | 317.0615  |
| 48   | 9      | 40     | 47    | 8       | 39      | E    | 0           | 289139.440   | -0.022                     | 317.0661  |
| 48   | 9      | 40     | 47    | 8       | 39      | A    | 0           | 289145.572   | -0.032                     | 317.0615  |
| 53   | 3      | 50     | 52    | 3       | 49      | E    | 0           | 289156.886   | -0.001                     | 331.7678  |
| 53   | 4      | 50     | 52    | 4       | 49      | E    | 0           | 289156.886   | -0.001                     | 331.7678  |
| 53   | 3      | 50     | 52    | 3       | 49      | A    | 0           | 289159.521   | 0.004                      | 331.7606  |
| 53   | 3      | 50     | 52    | 4       | 49      | A    | 0           | 289159.521   | 0.004                      | 331.7606  |
| 53   | 4      | 50     | 52    | 3       | 49      | A    | 0           | 289159.521   | 0.004                      | 331.7606  |
| 53   | 4      | 50     | 52    | 4       | 49      | A    | 0           | 289159.521   | 0.004                      | 331.7606  |
| 54   | 2      | 52     | 53    | 2       | 51      | A    | 1           | 289209.306   | -0.054                     | 461.9210  |
| 54   | 2      | 52     | 53    | 3       | 51      | A    | 1           | 289209.306   | -0.054                     | 461.9210  |
| 54   | 3      | 52     | 53    | 2       | 51      | A    | 1           | 289209.306   | -0.054                     | 461.9210  |
| 54   | 3      | 52     | 53    | 3       | 51      | A    | 1           | 289209.306   | -0.054                     | 461.9210  |
| 46   | 17     | 30     | 45    | 17      | 29      | A    | 0           | 289266.227   | 0.019                      | 336.6168  |
| 46   | 17     | 29     | 45    | 17      | 28      | A    | 0           | 289268.359   | -0.041                     | 336.6169  |
| 46   | 17     | 29     | 45    | 17      | 28      | E    | 0           | 289270.208   | -0.046                     | 336.6198  |
| 54   | 2      | 52     | 53    | 2       | 51      | E    | 1           | 289273.140   | 0.022                      | 461.6531  |
| 54   | 3      | 52     | 53    | 3       | 51      | E    | 1           | 289273.140   | 0.022                      | 461.6531  |
| 47   | 10     | 38     | 46    | 10      | 37      | A    | 1           | 289295.390   | 0.237                      | 441.0296  |
| 43   | 26     | 17     | 43    | 25      | 18      | A    | 0           | 289314.433   | -0.044                     | 380.8690  |
| 43   | 26     | 18     | 43    | 25      | 19      | A    | 0           | 289314.433   | -0.044                     | 380.8690  |
| 43   | 26     | 18     | 43    | 25      | 19      | E    | 0           | 289327.655   | -0.014                     | 380.8559  |
| 54   | 2      | 52     | 53    | 2       | 51      | E    | 0           | 289336.981   | 0.008                      | 333.3621  |
| 54   | 3      | 52     | 53    | 3       | 51      | E    | 0           | 289336.981   | 0.008                      | 333.3621  |
| 54   | 2      | 52     | 53    | 2       | 51      | A    | 0           | 289338.931   | 0.002                      | 333.3537  |
| 54   | 2      | 52     | 53    | 3       | 51      | A    | 0           | 289338.931   | 0.002                      | 333.3537  |
| 54   | 3      | 52     | 53    | 2       | 51      | A    | 0           | 289338.931   | 0.002                      | 333.3537  |
| 54   | 3      | 52     | 53    | 3       | 51      | A    | 0           | 289338.931   | 0.002                      | 333.3537  |
| 55   | 1      | 54     | 54    | 1       | 53      | A    | 1           | 289422.422   | 0.024                      | 463.1345  |
| 55   | 1      | 54     | 54    | 2       | 53      | A    | 1           | 289422.422   | 0.024                      | 463.1345  |
| 55   | 2      | 54     | 54    | 1       | 53      | A    | 1           | 289422.422   | 0.024                      | 463.1345  |
| 55   | 2      | 54     | 54    | 2       | 53      | A    | 1           | 289422.422   | 0.024                      | 463.1345  |
| 55   | 2      | 54     | 54    | 2       | 53      | E    | 1           | 289461.261   | 0.004                      | 462.8237  |
| 22   | 14     | 9      | 21    | 13      | 9       | E    | 0           | 289487.881   | -0.054                     | 146.9516  |
| 22   | 14     | 8      | 21    | 13      | 8       | E    | 0           | 289489.098   | 0.041                      | 146.9516  |
| 42   | 26     | 16     | 42    | 25      | 17      | E    | 0           | 289492.496   | -0.018                     | 371.9838  |
| 47   | 10     | 38     | 46    | 10      | 37      | E    | 1           | 289508.958   | -0.006                     | 440.8812  |
| 42   | 26     | 16     | 42    | 25      | 17      | A    | 0           | 289525.429   | -0.019                     | 371.9932  |
| 42   | 26     | 17     | 42    | 25      | 18      | A    | 0           | 289525.429   | -0.019                     | 371.9932  |
| 55   | 1      | 54     | 54    | 1       | 53      | E    | 0           | 289529.109   | -0.005                     | 334.5413  |
| 55   | 2      | 54     | 54    | 2       | 53      | E    | 0           | 289529.109   | -0.005                     | 334.5413  |
| 55   | 1      | 54     | 54    | 1       | 53      | A    | 0           | 289530.334   | 0.027                      | 334.5316  |
| 55   | 1      | 54     | 54    | 1       | 53      | A    | 0           | 289530.334   | 0.027                      | 334.5316  |
| 55   | 2      | 54     | 54    | 2       | 53      | A    | 0           | 289530.334   | 0.027                      | 334.5316  |
| 55   | 2      | 54     | 54    | 2       | 53      | A    | 0           | 289530.334   | 0.027                      | 334.5316  |
| 42   | 26     | 17     | 42    | 25      | 18      | E    | 0           | 289538.909   | 0.079                      | 371.9801  |
| 47   | 10     | 38     | 46    | 10      | 37      | E    | 0           | 289543.026   | -0.021                     | 312.5807  |
| 47   | 10     | 38     | 46    | 10      | 37      | A    | 0           | 289549.575   | -0.017                     | 312.5761  |
| 68   | 27     | 42     | 68    | 26      | 43      | A    | 0           | 289592.304   | -0.052                     | 681.3843  |
| 68   | 27     | 41     | 68    | 26      | 42      | A    | 0           | 289592.304   | -0.048                     | 681.3843  |
| 47   | 9      | 38     | 46    | 9       | 37      | A    | 1           | 289632.679   | 0.140                      | 441.0016  |
| 56   | 0      | 56     | 55    | 0       | 55      | A    | 1           | 289644.465   | 0.190                      | 463.9466  |
| 56   | 0      | 56     | 55    | 1       | 55      | A    | 1           | 289644.465   | 0.190                      | 463.9466  |
| 56   | 1      | 56     | 55    | 0       | 55      | A    | 1           | 289644.465   | 0.190                      | 463.9466  |
| 56   | 1      | 56     | 55    | 1       | 55      | A    | 1           | 289644.465   | 0.190                      | 463.9466  |
| 56   | 0      | 56     | 55    | 0       | 55      | E    | 1           | 289654.158   | 0.006                      | 463.5848  |
| 56   | 1      | 56     | 55    | 1       | 55      | E    | 1           | 289654.158   | 0.006                      | 463.5848  |
| 41   | 26     | 15     | 41    | 25      | 16      | E    | 0           | 289689.161   | -0.001                     | 363.3184  |
| 46   | 11     | 36     | 45    | 11      | 35      | E    | 0           | 289698.223   | -0.035                     | 307.4996  |
| 46   | 11     | 36     | 45    | 11      | 35      | A    | 0           | 289703.545   | 0.033                      | 307.4948  |
| 41   | 26     | 15     | 41    | 25      | 16      | A    | 0           | 289721.901   | -0.070                     | 363.3278  |
| 41   | 26     | 16     | 41    | 25      | 17      | A    | 0           | 289721.901   | -0.070                     | 363.3278  |
| 56   | 0      | 56     | 55    | 0       | 55      | A    | 0           | 289727.280   | -0.160                     | 335.3020  |
| 56   | 0      | 56     | 55    | 1       | 55      | A    | 0           | 289727.280   | -0.160                     | 335.3020  |
| 56   | 1      | 56     | 55    | 0       | 55      | A    | 0           | 289727.280   | -0.160                     | 335.3020  |
| 56   | 1      | 56     | 55    | 1       | 55      | A    | 0           | 289727.280   | -0.160                     | 335.3020  |
| 41   | 26     | 16     | 41    | 25      | 17      | E    | 0           | 289735.560   | 0.034                      | 363.3147  |
| 47   | 9      | 38     | 46    | 9       | 37      | E    | 1           | 289888.782   | 0.122                      | 440.8494  |
| 47   | 9      | 38     | 46    | 9       | 37      | E    | 0           | 289903.666   | -0.247                     | 312.5506  |
| 40   | 26     | 14     | 40    | 25      | 15      | A    | 0           | 289904.747   | -0.027                     | 354.8724  |
| 40   | 26     | 15     | 40    | 25      | 16      | A    | 0           | 289904.747   | -0.027                     | 354.8724  |
| 47   | 9      | 38     | 46    | 9       | 37      | A    | 0           | 289911.895   | -0.021                     | 312.5459  |
| 40   | 26     | 15     | 40    | 25      | 16      | E    | 0           | 289918.533   | 0.041                      | 354.8593  |
| 28   | 11     | 18     | 27    | 10      | 17      | A    | 0           | 289920.168   | -0.029                     | 164.6549  |
| 28   | 11     | 17     | 27    | 10      | 17      | E    | 0           | 289976.770   | -0.082                     | 164.6639  |
| 28   | 11     | 18     | 27    | 10      | 18      | E    | 0           | 289998.983   | 0.131                      | 164.6506  |
| 39   | 26     | 13     | 39    | 25      | 14      | E    | 0           | 290041.955   | -0.025                     | 346.6174  |
| 39   | 26     | 13     | 39    | 25      | 14      | A    | 0           | 290074.521   | -0.040                     | 346.6269  |
| 39   | 26     | 14     | 39    | 25      | 15      | A    | 0           | 290074.521   | -0.040                     | 346.6269  |
| 44   | 12     | 32     | 43    | 12      | 31      | A    | 0           | 290085.631   | -0.029                     | 293.3922  |
| 39   | 26     | 14     | 39    | 25      | 15      | E    | 0           | 290088.457   | 0.028                      | 346.6137  |
| 44   | 12     | 32     | 43    | 12      | 31      | E    | 0           | 290097.823   | -0.029                     | 293.3980  |
| 24   | 13     | 12     | 23    | 12      | 12      | E    | 0           | 290131.877   | 0.028                      | 151.5325  |
| 28   | 11     | 17     | 27    | 10      | 18      | A    | 0           | 290134.528   | 0.025                      | 164.6488  |
| 24   | 13     | 11     | 23    | 12      | 11      | E    | 0           | 290138.926   | -0.033                     | 151.5459  |
| 24   | 13     | 12     | 23    | 12      | 11      | A    | 0           | 290176.307   | -0.002                     | 151.5368  |
| 38   | 26     | 12     | 38    | 25      | 13      | E    | 0           | 290199.410   | -0.122                     | 338.5813  |
| 38   | 26     | 12     | 38    | 25      | 13      | A    | 0           | 290231.943   | -0.065                     | 338.5908  |
| 38   | 26     | 13     | 38    | 25      | 14      | A    | 0           | 290231.943   | -0.065                     | 338.5908  |
| 48   | 11     | 37     | 47    | 12      | 36      | A    | 0           | 290337.841   | -0.065                     | 331.3953  |
| 37   | 26     | 11     | 37    | 25      | 12      | E    | 0           | 290345.331   | -0.060                     | 330.7545  |
| 37   | 26     | 11     | 37    | 25      | 12      | A    | 0           | 290377.681   | -0.088                     | 330.7640  |
| 37   | 26     | 12     | 37    | 25      | 13      | A    | 0           | 290377.681   | -0.088                     | 330.7640  |
| 48   | 11     | 37     | 47    | 12      | 36      | E    | 0           | 290379.550   | 0.028                      | 331.3994  |
| 37   | 26     | 12     | 37    | 25      | 13      | E    | 0           | 290391.930   | 0.028                      | 330.7508  |
| 46   | 16     | 31     | 45    | 16      | 30      | A    | 0           | 290393.831   | -0.032                     | 330.6892  |
| 46   | 16     | 30     | 45    | 16      | 29      | E    | 0           | 290409.591   | -0.160                     | 330.6942  |
| 46   | 16     | 31     | 45    | 16      | 30      | E    | 0           | 290410.607   | 0.021                      | 330.6817  |
| 67   | 27     | 40     | 67    | 26      | 41      | A    | 0           | 290413.545   | -0.009                     | 667.1574  |
| 46   | 16     | 30     | 45    | 16      | 29      | A    | 0           | 290417.106   | -0.014                     | 330.6900  |
| 67   | 27     | 41     | 67    | 26      | 42      | E    | 0           | 290422.472   | -0.133                     | 667.1461  |
| 47   | 10     | 38     | 46    | 9       | 37      | E    | 0           | 290444.906   | -0.024                     | 312.5506  |
| 26   | 12     | 15     | 25    | 11      | 15      | E    | 0           | 290447.217   | -0.024                     | 157.4091  |
| 47   | 10     | 38     | 46    | 9       | 37      | A    | 0           | 290455.386   | 0.003                      | 312.5459  |
| 26   | 12     | 14     | 25    | 11      | 14      | E    | 0           | 290460.655   | -0.219                     | 157.4219  |
| 36   | 26     | 10     | 36    | 25      | 11      | E    | 0           | 290480.087   | -0.096                     | 323.1366  |
| 26   | 12     | 15     | 25    | 11      | 14      | A    | 0           | 290492.742   | -0.129                     | 157.4116  |
| 26   | 12     | 14     | 25    | 11      | 15      | A    | 0           | 290495.756   | 0.026                      | 157.4115  |
| 36   | 26     | 10     | 36    | 25      | 11      | A    | 0           | 290512.408   | -0.061                     | 323.1462  |
| 36   | 26     | 11     | 36    | 25      | 12      | A    | 0           | 290512.408   | -0.061                     | 323.1462  |
| 36   | 26     | 11     | 36    | 25      | 12      | E    | 0           | 290526.760   | 0.040                      | 323.1330  |



| $J'$ | $K'_a$ | $K'_c$ | $J''$ | $K''_a$ | $K''_c$ | Sym. | $v_{tCH_3}$ | $\nu_{Obs.}$ | $\nu_{Obs.} - \nu_{Calc.}$ | $E_{low}$ |
|------|--------|--------|-------|---------|---------|------|-------------|--------------|----------------------------|-----------|
| 35   | 26     | 9      | 35    | 25      | 10      | E    | 0           | 290604.490   | -0.026                     | 315.7276  |
| 30   | 10     | 20     | 29    | 9       | 21      | E    | 0           | 290624.079   | -0.026                     | 173.3331  |
| 30   | 10     | 20     | 29    | 9       | 21      | A    | 0           | 290630.444   | -0.008                     | 173.3265  |
| 35   | 26     | 9      | 35    | 25      | 10      | A    | 0           | 290636.661   | -0.055                     | 315.7371  |
| 35   | 26     | 10     | 35    | 25      | 11      | A    | 0           | 290636.661   | -0.055                     | 315.7371  |
| 35   | 26     | 10     | 35    | 25      | 11      | E    | 0           | 290651.097   | 0.022                      | 315.7239  |
| 34   | 26     | 8      | 34    | 25      | 9       | E    | 0           | 290718.963   | -0.010                     | 308.5270  |
| 34   | 26     | 8      | 34    | 25      | 9       | A    | 0           | 290751.034   | -0.059                     | 308.5366  |
| 34   | 26     | 9      | 34    | 25      | 10      | A    | 0           | 290751.034   | -0.059                     | 308.5366  |
| 33   | 26     | 7      | 33    | 25      | 8       | E    | 0           | 290824.124   | 0.008                      | 301.5347  |
| 33   | 26     | 7      | 33    | 25      | 8       | A    | 0           | 290856.115   | -0.046                     | 301.5443  |
| 33   | 26     | 8      | 33    | 25      | 9       | A    | 0           | 290856.115   | -0.046                     | 301.5443  |
| 47   | 27     | 21     | 46    | 27      | 20      | A    | 0           | 290879.834   | 0.040                      | 428.4059  |
| 47   | 27     | 20     | 46    | 27      | 19      | A    | 0           | 290879.834   | 0.040                      | 428.4059  |
| 47   | 10     | 37     | 46    | 11      | 36      | A    | 0           | 290907.041   | -0.027                     | 317.1583  |
| 63   | 3      | 60     | 63    | 2       | 61      | E    | 1           | 290915.096   | -0.177                     | 565.8354  |
| 63   | 4      | 60     | 63    | 3       | 61      | E    | 1           | 290915.096   | -0.177                     | 565.8354  |
| 47   | 10     | 37     | 46    | 11      | 36      | E    | 0           | 290916.631   | 0.072                      | 317.1629  |
| 32   | 26     | 6      | 32    | 25      | 7       | E    | 0           | 290920.493   | 0.004                      | 294.7505  |
| 32   | 26     | 6      | 32    | 25      | 7       | A    | 0           | 290952.401   | -0.062                     | 294.7601  |
| 32   | 26     | 7      | 32    | 25      | 8       | A    | 0           | 290952.401   | -0.062                     | 294.7601  |
| 32   | 26     | 7      | 32    | 25      | 8       | E    | 0           | 290967.129   | 0.038                      | 294.7469  |
| 31   | 26     | 5      | 31    | 25      | 6       | A    | 0           | 291040.435   | -0.087                     | 288.1838  |
| 31   | 26     | 6      | 31    | 25      | 7       | A    | 0           | 291040.435   | -0.087                     | 288.1838  |
| 31   | 26     | 6      | 31    | 25      | 7       | E    | 0           | 291055.309   | 0.086                      | 288.1705  |
| 30   | 26     | 4      | 30    | 25      | 5       | A    | 0           | 291120.807   | -0.033                     | 281.8150  |
| 30   | 26     | 5      | 30    | 25      | 6       | A    | 0           | 291120.807   | -0.033                     | 281.8150  |
| 47   | 26     | 21     | 46    | 26      | 20      | A    | 0           | 291126.110   | -0.081                     | 418.3875  |
| 47   | 26     | 22     | 46    | 26      | 21      | A    | 0           | 291126.110   | -0.081                     | 418.3875  |
| 47   | 26     | 21     | 46    | 26      | 20      | E    | 0           | 291127.725   | -0.033                     | 418.3772  |
| 30   | 26     | 5      | 30    | 25      | 6       | E    | 0           | 291135.653   | 0.045                      | 281.8018  |
| 66   | 27     | 39     | 66    | 26      | 40      | E    | 0           | 291157.538   | 0.057                      | 653.1418  |
| 66   | 27     | 40     | 66    | 26      | 41      | A    | 0           | 291192.002   | 0.009                      | 653.1501  |
| 66   | 27     | 39     | 66    | 26      | 40      | A    | 0           | 291192.002   | 0.010                      | 653.1501  |
| 66   | 27     | 40     | 66    | 26      | 41      | E    | 0           | 291201.611   | -0.135                     | 653.1388  |
| 47   | 24     | 23     | 46    | 24      | 22      | A    | 0           | 291715.504   | -0.051                     | 399.5292  |
| 47   | 24     | 24     | 46    | 24      | 23      | A    | 0           | 291715.504   | -0.051                     | 399.5292  |
| 46   | 15     | 32     | 45    | 15      | 31      | A    | 0           | 291809.279   | -0.068                     | 325.2327  |
| 46   | 15     | 32     | 45    | 15      | 31      | E    | 0           | 291848.908   | -0.034                     | 325.2294  |
| 45   | 13     | 32     | 44    | 13      | 31      | A    | 0           | 291876.081   | -0.038                     | 306.4312  |
| 45   | 13     | 32     | 44    | 13      | 31      | E    | 0           | 291888.126   | -0.037                     | 306.4351  |
| 65   | 27     | 38     | 65    | 26      | 39      | E    | 0           | 291898.544   | -0.190                     | 639.3535  |
| 44   | 11     | 33     | 43    | 11      | 32      | A    | 0           | 291934.206   | -0.040                     | 290.7288  |
| 65   | 27     | 39     | 65    | 26      | 40      | E    | 0           | 291940.213   | -0.050                     | 639.3505  |
| 46   | 15     | 31     | 45    | 15      | 30      | E    | 0           | 291981.952   | 0.005                      | 325.2441  |
| 46   | 15     | 31     | 45    | 15      | 30      | A    | 0           | 292010.126   | -0.034                     | 325.2408  |
| 47   | 23     | 25     | 46    | 23      | 24      | A    | 0           | 292071.372   | -0.076                     | 390.6938  |
| 47   | 23     | 24     | 46    | 23      | 23      | A    | 0           | 292071.372   | -0.076                     | 390.6938  |
| 47   | 22     | 25     | 46    | 22      | 24      | A    | 0           | 292479.766   | -0.042                     | 382.2581  |
| 47   | 22     | 26     | 46    | 22      | 25      | A    | 0           | 292479.766   | -0.042                     | 382.2581  |
| 47   | 22     | 26     | 46    | 22      | 25      | E    | 0           | 292481.914   | 0.042                      | 382.2450  |
| 64   | 27     | 37     | 64    | 26      | 38      | E    | 0           | 292595.408   | -0.005                     | 625.7837  |
| 64   | 27     | 38     | 64    | 26      | 39      | A    | 0           | 292629.129   | -0.003                     | 625.7923  |
| 64   | 27     | 37     | 64    | 26      | 38      | A    | 0           | 292629.129   | -0.003                     | 625.7923  |
| 64   | 27     | 38     | 64    | 26      | 39      | E    | 0           | 292639.981   | -0.206                     | 625.7808  |
| 46   | 10     | 36     | 45    | 10      | 35      | E    | 0           | 292899.095   | -0.012                     | 307.1847  |
| 65   | 4      | 61     | 65    | 3       | 62      | A    | 0           | 292901.037   | 0.072                      | 470.4825  |
| 65   | 5      | 61     | 65    | 4       | 62      | A    | 0           | 292901.037   | 0.072                      | 470.4825  |
| 46   | 10     | 36     | 45    | 10      | 35      | A    | 0           | 292913.351   | -0.008                     | 307.1790  |
| 47   | 21     | 27     | 46    | 21      | 26      | A    | 0           | 292952.839   | 0.089                      | 374.2260  |
| 47   | 21     | 26     | 46    | 21      | 25      | A    | 0           | 292952.839   | 0.089                      | 374.2260  |
| 47   | 21     | 26     | 46    | 21      | 25      | E    | 0           | 292955.207   | 0.029                      | 374.2224  |
| 70   | 7      | 63     | 70    | 6       | 64      | E    | 1           | 293081.178   | 0.039                      | 690.7696  |
| 70   | 8      | 63     | 70    | 7       | 64      | E    | 1           | 293081.178   | 0.039                      | 690.7696  |
| 17   | 17     | 0      | 16    | 16      | 0       | E    | 0           | 293125.738   | -0.061                     | 143.9725  |
| 17   | 17     | 1      | 16    | 16      | 1       | E    | 0           | 293141.300   | 0.041                      | 143.9592  |
| 17   | 17     | 1      | 16    | 16      | 0       | A    | 0           | 293172.412   | -0.031                     | 143.9691  |
| 17   | 17     | 0      | 16    | 16      | 1       | A    | 0           | 293172.412   | -0.031                     | 143.9691  |
| 70   | 7      | 63     | 70    | 6       | 64      | A    | 0           | 293178.084   | -0.000                     | 562.5116  |
| 70   | 8      | 63     | 70    | 7       | 64      | A    | 0           | 293178.084   | -0.000                     | 562.5116  |
| 63   | 27     | 37     | 63    | 26      | 38      | A    | 0           | 293291.786   | 0.022                      | 612.4407  |
| 63   | 27     | 36     | 63    | 26      | 37      | A    | 0           | 293291.786   | 0.022                      | 612.4407  |
| 46   | 12     | 35     | 45    | 12      | 34      | E    | 0           | 293350.929   | -0.065                     | 311.6357  |
| 46   | 12     | 35     | 45    | 12      | 34      | A    | 0           | 293352.165   | 0.013                      | 311.6315  |
| 46   | 14     | 33     | 45    | 14      | 32      | A    | 0           | 293396.164   | -0.031                     | 320.2713  |
| 46   | 14     | 33     | 45    | 14      | 32      | E    | 0           | 293408.516   | -0.029                     | 320.2723  |
| 62   | 2      | 60     | 62    | 1       | 61      | A    | 0           | 293487.008   | 0.205                      | 416.5807  |
| 62   | 3      | 60     | 62    | 2       | 61      | A    | 0           | 293487.008   | 0.205                      | 416.5807  |
| 47   | 20     | 27     | 46    | 20      | 26      | A    | 0           | 293506.492   | -0.040                     | 366.6026  |
| 47   | 20     | 28     | 46    | 20      | 27      | A    | 0           | 293506.492   | -0.038                     | 366.6026  |
| 47   | 20     | 27     | 46    | 20      | 26      | E    | 0           | 293509.297   | 0.161                      | 366.6007  |
| 51   | 6      | 45     | 50    | 6       | 44      | A    | 1           | 293730.782   | -0.107                     | 462.4751  |
| 51   | 6      | 45     | 50    | 7       | 44      | A    | 1           | 293730.782   | -0.071                     | 462.4751  |
| 51   | 7      | 45     | 50    | 6       | 44      | A    | 1           | 293730.782   | -0.125                     | 462.4751  |
| 51   | 7      | 45     | 50    | 7       | 44      | A    | 1           | 293730.782   | -0.090                     | 462.4751  |
| 50   | 7      | 43     | 49    | 8       | 42      | A    | 1           | 293741.969   | 0.006                      | 459.0695  |
| 50   | 8      | 43     | 49    | 7       | 42      | A    | 1           | 293743.772   | 0.020                      | 459.0694  |
| 52   | 5      | 47     | 51    | 5       | 46      | A    | 1           | 293814.991   | -0.065                     | 465.4069  |
| 52   | 5      | 47     | 51    | 6       | 46      | A    | 1           | 293814.991   | -0.064                     | 465.4069  |
| 52   | 6      | 47     | 51    | 5       | 46      | A    | 1           | 293814.991   | -0.065                     | 465.4069  |
| 52   | 6      | 47     | 51    | 6       | 46      | A    | 1           | 293814.991   | -0.064                     | 465.4069  |
| 51   | 6      | 45     | 50    | 6       | 44      | E    | 1           | 293872.098   | -0.027                     | 462.3168  |
| 51   | 6      | 45     | 50    | 7       | 44      | E    | 1           | 293872.098   | 0.016                      | 462.3168  |
| 51   | 7      | 45     | 50    | 6       | 44      | E    | 1           | 293872.098   | -0.050                     | 462.3168  |
| 51   | 7      | 45     | 50    | 7       | 44      | E    | 1           | 293872.098   | -0.006                     | 462.3168  |
| 62   | 27     | 35     | 62    | 26      | 36      | E    | 0           | 293886.534   | 0.012                      | 599.2977  |
| 49   | 8      | 41     | 48    | 9       | 40      | A    | 1           | 293901.968   | 0.027                      | 455.1547  |
| 50   | 7      | 43     | 49    | 8       | 42      | E    | 1           | 293903.197   | 0.027                      | 458.9232  |
| 50   | 8      | 43     | 49    | 7       | 42      | E    | 1           | 293905.348   | 0.025                      | 458.9232  |
| 62   | 27     | 36     | 62    | 26      | 37      | A    | 0           | 293919.496   | -0.020                     | 599.3066  |
| 62   | 27     | 35     | 62    | 26      | 36      | A    | 0           | 293919.496   | -0.020                     | 599.3066  |
| 51   | 6      | 45     | 50    | 6       | 44      | E    | 0           | 293926.269   | -0.013                     | 334.0113  |
| 51   | 7      | 45     | 50    | 7       | 44      | E    | 0           | 293926.269   | 0.006                      | 334.0113  |
| 51   | 6      | 45     | 50    | 6       | 44      | A    | 0           | 293930.628   | -0.019                     | 334.0063  |
| 51   | 6      | 45     | 50    | 7       | 44      | A    | 0           | 293930.628   | 0.021                      | 334.0063  |
| 51   | 7      | 45     | 50    | 6       | 44      | A    | 0           | 293930.628   | -0.039                     | 334.0063  |
| 51   | 7      | 45     | 50    | 7       | 44      | A    | 0           | 293930.628   | 0.001                      | 334.0063  |
| 52   | 5      | 47     | 51    | 5       | 46      | E    | 1           | 293937.948   | -0.015                     | 465.2308  |
| 52   | 5      | 47     | 51    | 6       | 46      | E    | 1           | 293937.948   | -0.014                     | 465.2308  |
| 52   | 6      | 47     | 51    | 5       | 46      | E    | 1           | 293937.948   | -0.016                     | 465.2308  |
| 52   | 6      | 47     | 51    | 6       | 46      | E    | 1           | 293937.948   | -0.015                     | 465.2308  |
| 49   | 9      | 41     | 48    | 8       | 40      | A    | 1           | 293946.464   | 0.086                      | 455.1538  |
| 53   | 4      | 49     | 52    | 4       | 48      | A    | 1           | 293956.803   | -0.095                     | 467.8888  |
| 53   | 4      | 49     | 52    | 5       | 48      | A    | 1           | 293956.803   | -0.095                     | 467.8888  |
| 53   | 5      | 49     | 52    | 4       | 48      | A    | 1           | 293956.803   | -0.095                     | 467.8888  |
| 53   | 5      | 49     | 52    | 5       | 48      | A    | 1           | 293956.803   | -0.095                     | 467.8888  |



| $J'$ | $K'_a$ | $K'_c$ | $J''$ | $K''_a$ | $K''_c$ | Sym. | $v_{tCH_3}$ | $\nu_{Obs.}$ | $\nu_{Obs.} - \nu_{Calc.}$ | $E_{low}$ |
|------|--------|--------|-------|---------|---------|------|-------------|--------------|----------------------------|-----------|
| 50   | 7      | 43     | 49    | 8       | 42      | A    | 0           | 293958.287   | -0.091                     | 330.6131  |
| 50   | 8      | 43     | 49    | 7       | 42      | A    | 0           | 293960.383   | 0.004                      | 330.6130  |
| 19   | 16     | 3      | 18    | 15      | 3       | E    | 0           | 293990.625   | -0.047                     | 145.2533  |
| 52   | 5      | 47     | 51    | 5       | 46      | E    | 0           | 293995.041   | 0.004                      | 336.9269  |
| 52   | 6      | 47     | 51    | 6       | 46      | E    | 0           | 293995.041   | 0.004                      | 336.9269  |
| 52   | 5      | 47     | 51    | 5       | 46      | A    | 0           | 293998.839   | 0.010                      | 336.9214  |
| 52   | 5      | 47     | 51    | 6       | 46      | A    | 0           | 293998.839   | 0.011                      | 336.9214  |
| 52   | 6      | 47     | 51    | 5       | 46      | A    | 0           | 293998.839   | 0.010                      | 336.9214  |
| 52   | 6      | 47     | 51    | 6       | 46      | A    | 0           | 293998.839   | 0.011                      | 336.9214  |
| 19   | 16     | 4      | 18    | 15      | 4       | E    | 0           | 294000.803   | 0.025                      | 145.2397  |
| 19   | 16     | 3      | 18    | 15      | 4       | A    | 0           | 294035.919   | -0.010                     | 145.2484  |
| 19   | 16     | 4      | 18    | 15      | 3       | A    | 0           | 294035.919   | -0.010                     | 145.2484  |
| 48   | 9      | 39     | 47    | 10      | 38      | A    | 1           | 294039.019   | 0.068                      | 450.6795  |
| 53   | 4      | 49     | 52    | 4       | 48      | E    | 1           | 294061.523   | -0.009                     | 467.6891  |
| 53   | 4      | 49     | 52    | 5       | 48      | E    | 1           | 294061.523   | -0.009                     | 467.6891  |
| 53   | 5      | 49     | 52    | 4       | 48      | E    | 1           | 294061.523   | -0.009                     | 467.6891  |
| 53   | 5      | 49     | 52    | 5       | 48      | E    | 1           | 294061.523   | -0.009                     | 467.6891  |
| 49   | 8      | 41     | 48    | 9       | 40      | E    | 1           | 294084.695   | -0.019                     | 455.0143  |
| 49   | 9      | 41     | 48    | 9       | 40      | E    | 1           | 294103.334   | -0.158                     | 455.0143  |
| 53   | 4      | 49     | 52    | 4       | 48      | E    | 0           | 294121.154   | 0.003                      | 339.3885  |
| 53   | 5      | 49     | 52    | 5       | 48      | E    | 0           | 294121.154   | 0.003                      | 339.3885  |
| 53   | 4      | 49     | 52    | 4       | 48      | A    | 0           | 294124.379   | 0.006                      | 339.3822  |
| 53   | 4      | 49     | 52    | 5       | 48      | A    | 0           | 294124.379   | 0.006                      | 339.3822  |
| 53   | 5      | 49     | 52    | 4       | 48      | A    | 0           | 294124.379   | 0.006                      | 339.3822  |
| 53   | 5      | 49     | 52    | 5       | 48      | A    | 0           | 294124.379   | 0.006                      | 339.3822  |
| 49   | 8      | 41     | 48    | 9       | 40      | E    | 0           | 294130.029   | -0.018                     | 326.7107  |
| 54   | 3      | 51     | 53    | 3       | 50      | A    | 1           | 294134.236   | -0.066                     | 469.9381  |
| 54   | 3      | 51     | 53    | 4       | 50      | A    | 1           | 294134.236   | -0.066                     | 469.9381  |
| 54   | 4      | 51     | 53    | 3       | 50      | A    | 1           | 294134.236   | -0.066                     | 469.9381  |
| 54   | 4      | 51     | 53    | 4       | 50      | A    | 1           | 294134.236   | -0.066                     | 469.9381  |
| 49   | 8      | 41     | 48    | 9       | 40      | A    | 0           | 294135.649   | -0.046                     | 326.7063  |
| 49   | 9      | 41     | 48    | 8       | 40      | E    | 1           | 294136.976   | 0.054                      | 455.0132  |
| 49   | 9      | 41     | 48    | 9       | 40      | E    | 0           | 294147.273   | -0.246                     | 326.7107  |
| 49   | 9      | 41     | 48    | 9       | 40      | A    | 0           | 294153.262   | -0.002                     | 326.7063  |
| 49   | 8      | 41     | 48    | 8       | 40      | E    | 0           | 294161.236   | -0.007                     | 326.7097  |
| 47   | 19     | 29     | 46    | 19      | 28      | A    | 0           | 294163.635   | -0.005                     | 359.3948  |
| 49   | 8      | 41     | 48    | 8       | 40      | A    | 0           | 294167.194   | 0.136                      | 326.7053  |
| 47   | 19     | 29     | 46    | 19      | 28      | E    | 0           | 294167.194   | -0.119                     | 359.3835  |
| 49   | 9      | 41     | 48    | 8       | 40      | E    | 0           | 294178.697   | -0.018                     | 326.7097  |
| 49   | 9      | 41     | 48    | 8       | 40      | A    | 0           | 294184.602   | -0.025                     | 326.7053  |
| 48   | 9      | 39     | 47    | 10      | 38      | E    | 1           | 294206.558   | 0.190                      | 450.5381  |
| 54   | 3      | 51     | 53    | 3       | 50      | E    | 1           | 294219.487   | -0.007                     | 469.7087  |
| 54   | 3      | 51     | 53    | 4       | 50      | E    | 1           | 294219.487   | -0.007                     | 469.7087  |
| 54   | 4      | 51     | 53    | 3       | 50      | E    | 1           | 294219.487   | -0.007                     | 469.7087  |
| 54   | 4      | 51     | 53    | 4       | 50      | E    | 1           | 294219.487   | -0.007                     | 469.7087  |
| 48   | 9      | 39     | 47    | 10      | 38      | E    | 0           | 294263.286   | -0.010                     | 322.2388  |
| 48   | 9      | 39     | 47    | 10      | 38      | A    | 0           | 294268.279   | -0.022                     | 322.2344  |
| 54   | 3      | 51     | 53    | 3       | 50      | E    | 0           | 294281.759   | 0.005                      | 341.4131  |
| 54   | 4      | 51     | 53    | 4       | 50      | E    | 0           | 294281.759   | 0.005                      | 341.4131  |
| 54   | 3      | 51     | 53    | 3       | 50      | A    | 0           | 294284.391   | 0.019                      | 341.4059  |
| 54   | 3      | 51     | 53    | 4       | 50      | A    | 0           | 294284.391   | 0.019                      | 341.4059  |
| 54   | 4      | 51     | 53    | 3       | 50      | A    | 0           | 294284.391   | 0.019                      | 341.4059  |
| 54   | 4      | 51     | 53    | 4       | 50      | A    | 0           | 294284.391   | 0.019                      | 341.4059  |
| 55   | 2      | 53     | 54    | 2       | 52      | A    | 1           | 294333.844   | -0.048                     | 471.5680  |
| 55   | 2      | 53     | 54    | 3       | 52      | A    | 1           | 294333.844   | -0.048                     | 471.5680  |
| 55   | 3      | 53     | 54    | 2       | 52      | A    | 1           | 294333.844   | -0.048                     | 471.5680  |
| 55   | 3      | 53     | 54    | 3       | 52      | A    | 1           | 294333.844   | -0.048                     | 471.5680  |
| 46   | 13     | 34     | 45    | 13      | 33      | A    | 0           | 294386.825   | -0.023                     | 315.7879  |
| 46   | 13     | 34     | 45    | 13      | 33      | E    | 0           | 294390.942   | -0.096                     | 315.7910  |
| 55   | 2      | 53     | 54    | 2       | 52      | E    | 1           | 294397.468   | 0.014                      | 471.3022  |
| 55   | 3      | 53     | 54    | 3       | 52      | E    | 1           | 294397.468   | 0.014                      | 471.3022  |
| 55   | 2      | 53     | 54    | 2       | 52      | E    | 0           | 294462.828   | 0.007                      | 343.0133  |
| 55   | 3      | 53     | 54    | 3       | 52      | E    | 0           | 294462.828   | 0.007                      | 343.0133  |
| 55   | 2      | 53     | 54    | 2       | 52      | A    | 0           | 294464.774   | 0.003                      | 343.0050  |
| 55   | 2      | 53     | 54    | 3       | 52      | A    | 0           | 294464.774   | 0.003                      | 343.0050  |
| 55   | 3      | 53     | 54    | 2       | 52      | A    | 0           | 294464.774   | 0.003                      | 343.0050  |
| 55   | 3      | 53     | 54    | 3       | 52      | A    | 0           | 294464.774   | 0.003                      | 343.0050  |
| 61   | 27     | 34     | 61    | 26      | 35      | E    | 0           | 294481.320   | -0.086                     | 586.3805  |
| 61   | 27     | 35     | 61    | 26      | 36      | A    | 0           | 294514.052   | -0.009                     | 586.3895  |
| 61   | 27     | 34     | 61    | 26      | 35      | A    | 0           | 294514.052   | -0.009                     | 586.3895  |
| 61   | 27     | 35     | 61    | 26      | 36      | E    | 0           | 294526.618   | -0.207                     | 586.3777  |
| 56   | 1      | 55     | 55    | 1       | 54      | A    | 1           | 294547.368   | 0.016                      | 472.7886  |
| 56   | 1      | 55     | 55    | 2       | 54      | A    | 1           | 294547.368   | 0.016                      | 472.7886  |
| 56   | 2      | 55     | 55    | 1       | 54      | A    | 1           | 294547.368   | 0.016                      | 472.7886  |
| 56   | 2      | 55     | 55    | 2       | 54      | A    | 1           | 294547.368   | 0.016                      | 472.7886  |
| 56   | 2      | 55     | 55    | 2       | 54      | E    | 1           | 294586.158   | 0.039                      | 472.4791  |
| 56   | 1      | 55     | 55    | 1       | 54      | E    | 0           | 294655.351   | -0.045                     | 344.1989  |
| 56   | 2      | 55     | 55    | 2       | 54      | E    | 0           | 294655.351   | -0.045                     | 344.1989  |
| 56   | 1      | 55     | 55    | 1       | 54      | A    | 0           | 294656.589   | 0.003                      | 344.1893  |
| 56   | 1      | 55     | 55    | 2       | 54      | A    | 0           | 294656.589   | 0.003                      | 344.1893  |
| 56   | 2      | 55     | 55    | 1       | 54      | A    | 0           | 294656.589   | 0.003                      | 344.1893  |
| 56   | 2      | 55     | 55    | 2       | 54      | A    | 0           | 294656.589   | 0.003                      | 344.1893  |
| 46   | 14     | 32     | 45    | 14      | 31      | A    | 0           | 294728.902   | 0.095                      | 320.3358  |
| 46   | 14     | 32     | 45    | 14      | 31      | E    | 0           | 294731.364   | 0.034                      | 320.3381  |
| 57   | 0      | 57     | 56    | 0       | 56      | A    | 1           | 294769.672   | 0.190                      | 473.6081  |
| 57   | 0      | 57     | 56    | 1       | 56      | A    | 1           | 294769.672   | 0.190                      | 473.6081  |
| 57   | 1      | 57     | 56    | 0       | 56      | A    | 1           | 294769.672   | 0.190                      | 473.6081  |
| 57   | 1      | 57     | 56    | 1       | 56      | A    | 1           | 294769.672   | 0.190                      | 473.6081  |
| 57   | 0      | 57     | 56    | 0       | 56      | E    | 1           | 294779.208   | -0.065                     | 473.2466  |
| 57   | 1      | 57     | 56    | 1       | 56      | E    | 1           | 294779.208   | -0.065                     | 473.2466  |
| 67   | 5      | 62     | 67    | 4       | 63      | E    | 0           | 294796.754   | -0.093                     | 504.4927  |
| 67   | 6      | 62     | 67    | 5       | 63      | E    | 0           | 294796.754   | -0.093                     | 504.4927  |
| 48   | 9      | 39     | 47    | 9       | 38      | E    | 0           | 294804.285   | -0.027                     | 322.2208  |
| 48   | 9      | 39     | 47    | 9       | 38      | A    | 0           | 294811.799   | 0.029                      | 322.2163  |
| 21   | 15     | 7      | 20    | 14      | 7       | E    | 0           | 294833.699   | 0.016                      | 147.7461  |
| 48   | 10     | 39     | 47    | 9       | 38      | A    | 1           | 294837.400   | 0.209                      | 450.6627  |
| 57   | 0      | 57     | 56    | 0       | 56      | A    | 0           | 294853.762   | -0.152                     | 344.9663  |
| 57   | 0      | 57     | 56    | 1       | 56      | A    | 0           | 294853.762   | -0.152                     | 344.9663  |
| 57   | 1      | 57     | 56    | 0       | 56      | A    | 0           | 294853.762   | -0.152                     | 344.9663  |
| 57   | 1      | 57     | 56    | 1       | 56      | A    | 0           | 294853.762   | -0.152                     | 344.9663  |
| 57   | 0      | 57     | 56    | 0       | 56      | E    | 0           | 294853.762   | 0.158                      | 344.9775  |
| 57   | 1      | 57     | 56    | 1       | 56      | E    | 0           | 294853.762   | 0.158                      | 344.9775  |
| 21   | 15     | 7      | 20    | 14      | 6       | A    | 0           | 294872.377   | 0.002                      | 147.7534  |
| 21   | 15     | 6      | 20    | 14      | 7       | A    | 0           | 294872.377   | 0.002                      | 147.7534  |
| 47   | 11     | 37     | 46    | 11      | 36      | E    | 1           | 294900.557   | 0.061                      | 445.4564  |
| 47   | 11     | 37     | 46    | 11      | 36      | E    | 0           | 294940.397   | 0.092                      | 317.1629  |
| 47   | 11     | 37     | 46    | 11      | 36      | A    | 0           | 294946.166   | -0.012                     | 317.1583  |
| 47   | 18     | 29     | 46    | 18      | 28      | A    | 0           | 294956.556   | -0.190                     | 352.6116  |
| 47   | 18     | 30     | 46    | 18      | 29      | A    | 0           | 294956.556   | 0.175                      | 352.6115  |
| 47   | 18     | 29     | 46    | 18      | 28      | E    | 0           | 294959.531   | 0.006                      | 352.6129  |
| 47   | 18     | 30     | 46    | 18      | 29      | E    | 0           | 294960.967   | -0.032                     | 352.6012  |
| 60   | 27     | 34     | 60    | 26      | 35      | A    | 0           | 295077.055   | 0.082                      | 573.6890  |
| 60   | 27     | 33     | 60    | 26      | 34      | A    | 0           | 295077.055   | 0.082                      | 573.6890  |
| 60   | 27     | 34     | 60    | 26      | 35      | E    | 0           | 295090.196   | -0.050                     | 573.6771  |
| 48   | 10     | 39     | 47    | 9       | 38      | E    | 1           | 295121.136   | 0.038                      | 450.5190  |
| 48   | 10     | 39     | 47    | 9       | 38      | E    | 0           | 295124.888   | -0.018                     | 322.2208  |



| $J'$ | $K'_a$ | $K'_c$ | $J''$ | $K''_a$ | $K''_c$ | Sym. | $v_{tCH_3}$ | $\nu_{Obs.}$ | $\nu_{Obs.} - \nu_{Calc.}$ | $E_{low}$ |
|------|--------|--------|-------|---------|---------|------|-------------|--------------|----------------------------|-----------|
| 48   | 10     | 39     | 47    | 9       | 38      | A    | 0           | 295133.826   | -0.052                     | 322.2163  |
| 29   | 11     | 19     | 28    | 10      | 18      | A    | 0           | 295433.615   | -0.009                     | 170.5475  |
| 29   | 11     | 18     | 28    | 10      | 18      | E    | 0           | 295545.100   | -0.032                     | 170.5553  |
| 59   | 27     | 32     | 59    | 26      | 33      | E    | 0           | 295577.661   | -0.055                     | 561.1953  |
| 23   | 14     | 10     | 22    | 13      | 10      | E    | 0           | 295591.951   | -0.032                     | 151.4935  |
| 23   | 14     | 9      | 22    | 13      | 9       | E    | 0           | 295593.190   | -0.029                     | 151.5072  |
| 59   | 27     | 33     | 59    | 26      | 34      | A    | 0           | 295609.715   | -0.022                     | 561.2046  |
| 59   | 27     | 32     | 59    | 26      | 33      | A    | 0           | 295609.715   | -0.022                     | 561.2046  |
| 59   | 27     | 33     | 59    | 26      | 34      | E    | 0           | 295623.465   | -0.028                     | 561.1926  |
| 23   | 14     | 9      | 22    | 13      | 10      | A    | 0           | 295633.787   | -0.014                     | 151.4993  |
| 23   | 14     | 10     | 22    | 13      | 9       | A    | 0           | 295633.787   | -0.014                     | 151.4993  |
| 29   | 11     | 19     | 28    | 10      | 19      | E    | 0           | 295673.918   | 0.063                      | 170.5384  |
| 29   | 11     | 18     | 28    | 10      | 19      | A    | 0           | 295864.979   | -0.005                     | 170.5353  |
| 47   | 17     | 31     | 46    | 17      | 30      | A    | 0           | 295932.602   | -0.012                     | 346.2657  |
| 47   | 17     | 30     | 46    | 17      | 29      | A    | 0           | 295936.847   | -0.130                     | 346.2659  |
| 47   | 17     | 30     | 46    | 17      | 29      | E    | 0           | 295938.031   | 0.051                      | 346.2688  |
| 47   | 17     | 31     | 46    | 17      | 30      | E    | 0           | 295940.172   | -0.014                     | 346.2567  |
| 58   | 27     | 31     | 58    | 26      | 32      | E    | 0           | 296082.027   | -0.005                     | 548.9264  |
| 58   | 27     | 32     | 58    | 26      | 33      | A    | 0           | 296113.823   | 0.067                      | 548.9358  |
| 58   | 27     | 31     | 58    | 26      | 32      | A    | 0           | 296113.823   | 0.067                      | 548.9358  |
| 58   | 27     | 32     | 58    | 26      | 33      | E    | 0           | 296127.917   | -0.052                     | 548.9237  |
| 25   | 13     | 13     | 24    | 12      | 13      | E    | 0           | 296175.302   | 0.011                      | 156.5070  |
| 25   | 13     | 12     | 24    | 12      | 12      | E    | 0           | 296182.560   | -0.059                     | 156.5204  |
| 25   | 13     | 13     | 24    | 12      | 12      | A    | 0           | 296219.879   | -0.006                     | 156.5112  |
| 27   | 12     | 16     | 26    | 11      | 16      | E    | 0           | 296363.293   | -0.011                     | 162.8293  |
| 27   | 12     | 15     | 26    | 11      | 15      | E    | 0           | 296377.299   | -0.050                     | 162.8420  |
| 27   | 12     | 16     | 26    | 11      | 15      | A    | 0           | 296407.162   | -0.070                     | 162.8318  |
| 27   | 12     | 15     | 26    | 11      | 16      | A    | 0           | 296414.173   | 0.056                      | 162.8316  |
| 57   | 27     | 30     | 57    | 26      | 31      | E    | 0           | 296558.944   | 0.025                      | 536.8727  |
| 69   | 7      | 63     | 69    | 6       | 64      | E    | 0           | 296560.148   | 0.035                      | 539.5752  |
| 69   | 6      | 63     | 69    | 5       | 64      | A    | 0           | 296588.328   | -0.073                     | 539.5718  |
| 69   | 7      | 63     | 69    | 6       | 64      | A    | 0           | 296588.328   | -0.073                     | 539.5718  |
| 57   | 27     | 31     | 57    | 26      | 32      | A    | 0           | 296590.338   | -0.022                     | 536.8822  |
| 57   | 27     | 30     | 57    | 26      | 31      | A    | 0           | 296590.338   | -0.022                     | 536.8822  |
| 57   | 27     | 31     | 57    | 26      | 32      | E    | 0           | 296605.063   | 0.059                      | 536.8701  |
| 48   | 29     | 20     | 47    | 29      | 19      | A    | 0           | 296750.577   | -0.043                     | 459.3018  |
| 48   | 29     | 19     | 47    | 29      | 18      | A    | 0           | 296750.577   | -0.043                     | 459.3018  |
| 48   | 29     | 19     | 47    | 29      | 18      | E    | 0           | 296750.577   | -0.322                     | 459.2915  |
| 48   | 28     | 21     | 47    | 28      | 20      | E    | 0           | 296963.702   | 0.051                      | 448.4982  |
| 56   | 27     | 29     | 56    | 26      | 30      | E    | 0           | 297009.558   | -0.080                     | 525.0338  |
| 56   | 27     | 30     | 56    | 26      | 31      | A    | 0           | 297040.805   | -0.003                     | 525.0434  |
| 56   | 27     | 29     | 56    | 26      | 30      | A    | 0           | 297040.805   | -0.003                     | 525.0434  |
| 56   | 27     | 30     | 56    | 26      | 31      | E    | 0           | 297055.822   | -0.038                     | 525.0312  |
| 47   | 10     | 37     | 46    | 10      | 36      | E    | 0           | 297153.780   | -0.034                     | 316.9548  |
| 47   | 16     | 32     | 46    | 16      | 31      | A    | 0           | 297158.888   | -0.038                     | 340.3757  |
| 47   | 16     | 32     | 46    | 16      | 31      | E    | 0           | 297183.321   | -0.020                     | 340.3688  |
| 47   | 16     | 31     | 46    | 16      | 30      | E    | 0           | 297188.072   | 0.005                      | 340.3812  |
| 48   | 27     | 22     | 47    | 27      | 21      | A    | 0           | 297197.543   | 0.028                      | 438.1086  |
| 48   | 27     | 21     | 47    | 27      | 20      | A    | 0           | 297197.543   | 0.028                      | 438.1086  |
| 48   | 27     | 21     | 47    | 27      | 20      | E    | 0           | 297199.033   | 0.007                      | 438.0974  |
| 47   | 16     | 31     | 46    | 16      | 30      | A    | 0           | 297202.294   | -0.047                     | 340.3773  |
| 55   | 27     | 28     | 55    | 26      | 29      | E    | 0           | 297435.336   | -0.050                     | 513.4094  |
| 48   | 26     | 22     | 47    | 26      | 21      | A    | 0           | 297460.220   | -0.050                     | 428.0984  |
| 48   | 26     | 23     | 47    | 26      | 22      | A    | 0           | 297460.220   | -0.050                     | 428.0984  |
| 55   | 27     | 29     | 55    | 26      | 30      | E    | 0           | 297481.641   | -0.093                     | 513.4068  |
| 45   | 11     | 34     | 44    | 11      | 33      | E    | 0           | 297482.864   | 0.004                      | 300.4739  |
| 48   | 10     | 38     | 47    | 11      | 37      | A    | 0           | 297551.106   | -0.007                     | 326.9966  |
| 48   | 10     | 38     | 47    | 11      | 37      | E    | 0           | 297555.055   | -0.018                     | 327.0010  |
| 31   | 10     | 21     | 30    | 9       | 22      | E    | 0           | 297623.199   | 0.027                      | 179.6904  |
| 31   | 10     | 21     | 30    | 9       | 22      | A    | 0           | 297637.433   | -0.023                     | 179.6836  |
| 48   | 25     | 24     | 47    | 25      | 23      | A    | 0           | 297755.458   | -0.068                     | 418.4814  |
| 48   | 25     | 23     | 47    | 25      | 22      | A    | 0           | 297755.458   | -0.068                     | 418.4814  |
| 66   | 4      | 62     | 66    | 3       | 63      | E    | 0           | 297808.073   | -0.035                     | 482.3559  |
| 66   | 5      | 62     | 66    | 4       | 63      | E    | 0           | 297808.073   | -0.035                     | 482.3559  |
| 54   | 27     | 27     | 54    | 26      | 28      | E    | 0           | 297837.228   | -0.075                     | 501.9990  |
| 66   | 4      | 62     | 66    | 3       | 63      | A    | 0           | 297845.787   | 0.003                      | 482.3499  |
| 66   | 5      | 62     | 66    | 4       | 63      | A    | 0           | 297845.787   | 0.003                      | 482.3499  |
| 54   | 27     | 28     | 54    | 26      | 29      | A    | 0           | 297867.940   | -0.031                     | 502.0087  |
| 54   | 27     | 27     | 54    | 26      | 28      | A    | 0           | 297867.940   | -0.031                     | 502.0087  |
| 54   | 27     | 28     | 54    | 26      | 29      | E    | 0           | 297883.716   | -0.052                     | 501.9964  |
| 66   | 4      | 62     | 66    | 3       | 63      | E    | 1           | 297896.517   | -0.290                     | 610.6203  |
| 66   | 5      | 62     | 66    | 4       | 63      | E    | 1           | 297896.517   | -0.289                     | 610.6203  |
| 45   | 12     | 33     | 44    | 12      | 32      | A    | 0           | 298067.880   | -0.051                     | 303.0684  |
| 45   | 12     | 33     | 44    | 12      | 32      | E    | 0           | 298077.517   | -0.023                     | 303.0746  |
| 48   | 24     | 24     | 47    | 24      | 23      | A    | 0           | 298089.449   | -0.017                     | 409.2598  |
| 48   | 24     | 25     | 47    | 24      | 24      | A    | 0           | 298089.449   | -0.017                     | 409.2598  |
| 45   | 11     | 35     | 44    | 10      | 34      | E    | 0           | 298225.177   | -0.031                     | 297.5518  |
| 53   | 27     | 27     | 53    | 26      | 28      | A    | 0           | 298246.888   | -0.021                     | 490.8120  |
| 53   | 27     | 26     | 53    | 26      | 27      | A    | 0           | 298246.888   | -0.021                     | 490.8120  |
| 53   | 27     | 27     | 53    | 26      | 28      | E    | 0           | 298263.099   | 0.052                      | 490.7997  |
| 45   | 11     | 35     | 44    | 10      | 34      | A    | 0           | 298271.799   | 0.032                      | 297.5455  |
| 48   | 23     | 26     | 47    | 23      | 25      | A    | 0           | 298469.873   | -0.041                     | 400.4362  |
| 48   | 23     | 25     | 47    | 23      | 24      | A    | 0           | 298469.873   | -0.041                     | 400.4362  |
| 48   | 23     | 26     | 47    | 23      | 25      | E    | 0           | 298471.834   | 0.103                      | 400.4230  |
| 52   | 27     | 25     | 52    | 26      | 26      | E    | 0           | 298573.878   | -0.057                     | 479.8187  |
| 63   | 2      | 61     | 63    | 1       | 62      | E    | 1           | 298581.741   | -0.302                     | 555.8758  |
| 63   | 3      | 61     | 63    | 2       | 62      | E    | 1           | 298581.741   | -0.302                     | 555.8758  |
| 44   | 11     | 34     | 43    | 10      | 33      | E    | 0           | 298600.003   | -0.071                     | 288.0545  |
| 52   | 27     | 26     | 52    | 26      | 27      | A    | 0           | 298604.096   | -0.051                     | 479.8286  |
| 52   | 27     | 25     | 52    | 26      | 26      | A    | 0           | 298604.096   | -0.051                     | 479.8286  |
| 52   | 27     | 26     | 52    | 26      | 27      | E    | 0           | 298620.498   | -0.110                     | 479.8162  |
| 44   | 11     | 34     | 43    | 10      | 33      | A    | 0           | 298657.444   | 0.038                      | 288.0478  |
| 47   | 15     | 33     | 46    | 15      | 32      | A    | 0           | 298677.095   | -0.044                     | 334.9664  |
| 51   | 7      | 44     | 50    | 8       | 43      | A    | 1           | 298838.607   | -0.018                     | 468.8677  |
| 51   | 8      | 44     | 50    | 7       | 43      | A    | 1           | 298839.577   | -0.001                     | 468.8676  |
| 52   | 6      | 46     | 51    | 6       | 45      | A    | 1           | 298841.596   | -0.035                     | 472.2729  |
| 52   | 6      | 46     | 51    | 7       | 45      | A    | 1           | 298841.596   | -0.017                     | 472.2729  |
| 52   | 7      | 46     | 51    | 6       | 45      | A    | 1           | 298841.596   | -0.044                     | 472.2729  |
| 52   | 7      | 46     | 51    | 7       | 45      | A    | 1           | 298841.596   | -0.026                     | 472.2729  |
| 48   | 22     | 26     | 47    | 22      | 25      | A    | 0           | 298906.932   | -0.024                     | 392.0141  |
| 48   | 22     | 27     | 47    | 22      | 26      | A    | 0           | 298906.932   | -0.024                     | 392.0141  |
| 48   | 22     | 26     | 47    | 22      | 25      | E    | 0           | 298909.260   | -0.100                     | 392.0091  |
| 48   | 22     | 27     | 47    | 22      | 26      | E    | 0           | 298909.260   | 0.079                      | 392.0011  |
| 51   | 27     | 24     | 51    | 26      | 25      | E    | 0           | 298910.618   | -0.057                     | 469.0481  |
| 53   | 5      | 48     | 52    | 5       | 47      | A    | 1           | 298933.008   | -0.084                     | 475.2075  |
| 53   | 5      | 48     | 52    | 6       | 47      | A    | 1           | 298933.008   | -0.084                     | 475.2075  |
| 53   | 6      | 48     | 52    | 5       | 47      | A    | 1           | 298933.008   | -0.084                     | 475.2075  |
| 53   | 6      | 48     | 52    | 6       | 47      | A    | 1           | 298933.008   | -0.084                     | 475.2075  |
| 51   | 27     | 25     | 51    | 26      | 26      | A    | 0           | 298940.658   | -0.018                     | 469.0581  |
| 51   | 27     | 24     | 51    | 26      | 25      | A    | 0           | 298940.658   | -0.018                     | 469.0581  |
| 51   | 27     | 25     | 51    | 26      | 26      | E    | 0           | 298957.436   | -0.002                     | 469.0457  |
| 50   | 8      | 42     | 49    | 9       | 41      | A    | 1           | 298977.946   | 0.089                      | 464.9588  |
| 52   | 6      | 46     | 51    | 6       | 45      | E    | 1           | 298981.248   | 0.006                      | 472.1193  |
| 52   | 6      | 46     | 51    | 7       | 45      | E    | 1           | 298981.248   | 0.028                      | 472.1193  |
| 52   | 7      | 46     | 51    | 6       | 45      | E    | 1           | 298981.248   | -0.006                     | 472.1193  |
| 52   | 7      | 46     | 51    | 7       | 45      | E    | 1           | 298981.248   | 0.017                      | 472.1193  |



| $J'$ | $K'_a$ | $K'_c$ | $J''$ | $K''_a$ | $K''_c$ | Sym. | $v_{tCH_3}$ | $\nu_{Obs.}$ | $\nu_{Obs.} - \nu_{Calc.}$ | $E_{low}$ |
|------|--------|--------|-------|---------|---------|------|-------------|--------------|----------------------------|-----------|
| 50   | 9      | 42     | 49    | 9       | 41      | A    | 1           | 298986.787   | 0.109                      | 464.9588  |
| 50   | 8      | 42     | 49    | 8       | 41      | A    | 1           | 298993.818   | 0.040                      | 464.9582  |
| 51   | 7      | 44     | 50    | 8       | 43      | E    | 1           | 298997.398   | -0.018                     | 468.7268  |
| 51   | 8      | 44     | 50    | 7       | 43      | E    | 1           | 298998.564   | -0.007                     | 468.7268  |
| 50   | 9      | 42     | 49    | 8       | 41      | A    | 1           | 299002.638   | 0.039                      | 464.9582  |
| 47   | 15     | 32     | 46    | 15      | 31      | E    | 0           | 299006.209   | -0.010                     | 334.9836  |
| 47   | 15     | 32     | 46    | 15      | 31      | A    | 0           | 299025.679   | -0.090                     | 334.9812  |
| 52   | 6      | 46     | 51    | 6       | 45      | E    | 0           | 299037.609   | -0.003                     | 343.8156  |
| 52   | 7      | 46     | 51    | 7       | 45      | E    | 0           | 299037.609   | 0.007                      | 343.8156  |
| 52   | 6      | 46     | 51    | 6       | 45      | A    | 0           | 299041.931   | 0.006                      | 343.8107  |
| 52   | 6      | 46     | 51    | 7       | 45      | A    | 0           | 299041.931   | 0.026                      | 343.8108  |
| 52   | 7      | 46     | 51    | 6       | 45      | A    | 0           | 299041.931   | -0.005                     | 343.8107  |
| 52   | 7      | 46     | 51    | 7       | 45      | A    | 0           | 299041.931   | 0.016                      | 343.8108  |
| 51   | 8      | 44     | 50    | 7       | 43      | A    | 0           | 299056.209   | 0.037                      | 340.4185  |
| 54   | 4      | 50     | 53    | 4       | 49      | A    | 1           | 299078.515   | -0.099                     | 477.6941  |
| 54   | 4      | 50     | 53    | 5       | 49      | A    | 1           | 299078.515   | -0.099                     | 477.6941  |
| 54   | 5      | 50     | 53    | 4       | 49      | A    | 1           | 299078.515   | -0.099                     | 477.6941  |
| 54   | 5      | 50     | 53    | 5       | 49      | A    | 1           | 299078.515   | -0.099                     | 477.6941  |
| 53   | 5      | 48     | 52    | 5       | 47      | E    | 0           | 299113.988   | 0.011                      | 346.7335  |
| 53   | 6      | 48     | 52    | 6       | 47      | E    | 0           | 299113.988   | 0.011                      | 346.7335  |
| 53   | 5      | 48     | 52    | 5       | 47      | A    | 0           | 299117.746   | 0.010                      | 346.7281  |
| 53   | 5      | 48     | 52    | 6       | 47      | A    | 0           | 299117.746   | 0.010                      | 346.7281  |
| 53   | 6      | 48     | 52    | 5       | 47      | A    | 0           | 299117.746   | 0.010                      | 346.7281  |
| 53   | 6      | 48     | 52    | 6       | 47      | A    | 0           | 299117.746   | 0.010                      | 346.7281  |
| 46   | 11     | 36     | 45    | 10      | 35      | E    | 0           | 299136.316   | -0.046                     | 307.1847  |
| 47   | 12     | 36     | 46    | 12      | 35      | E    | 0           | 299148.597   | -0.037                     | 321.4209  |
| 47   | 12     | 36     | 46    | 12      | 35      | A    | 0           | 299150.994   | -0.046                     | 321.4167  |
| 50   | 8      | 42     | 49    | 9       | 41      | E    | 1           | 299158.123   | -0.053                     | 464.8246  |
| 46   | 11     | 36     | 45    | 10      | 35      | A    | 0           | 299172.943   | -0.002                     | 307.1790  |
| 50   | 8      | 42     | 49    | 8       | 41      | E    | 1           | 299176.984   | 0.031                      | 464.8239  |
| 54   | 4      | 50     | 53    | 4       | 49      | E    | 1           | 299182.543   | -0.040                     | 477.4979  |
| 54   | 4      | 50     | 53    | 5       | 49      | E    | 1           | 299182.543   | -0.040                     | 477.4979  |
| 54   | 5      | 50     | 53    | 5       | 49      | E    | 1           | 299182.543   | -0.040                     | 477.4979  |
| 54   | 5      | 50     | 53    | 4       | 49      | E    | 1           | 299182.543   | -0.040                     | 477.4979  |
| 49   | 9      | 40     | 48    | 10      | 39      | A    | 1           | 299187.430   | 0.011                      | 464.8239  |
| 49   | 9      | 40     | 48    | 10      | 39      | A    | 1           | 299198.413   | 0.054                      | 460.4974  |
| 50   | 8      | 42     | 49    | 9       | 41      | E    | 0           | 299206.035   | -0.017                     | 336.5224  |
| 50   | 8      | 42     | 49    | 9       | 41      | E    | 0           | 299211.387   | -0.244                     | 336.5182  |
| 50   | 9      | 42     | 49    | 9       | 41      | A    | 0           | 299215.661   | -0.104                     | 336.5224  |
| 50   | 9      | 42     | 49    | 9       | 41      | A    | 0           | 299221.387   | -0.012                     | 336.5182  |
| 50   | 8      | 42     | 49    | 8       | 41      | E    | 0           | 299223.521   | -0.004                     | 336.5219  |
| 50   | 27     | 23     | 50    | 26      | 24      | E    | 0           | 299227.577   | -0.063                     | 458.4901  |
| 50   | 8      | 42     | 49    | 8       | 41      | A    | 0           | 299229.168   | -0.033                     | 336.5176  |
| 50   | 9      | 42     | 49    | 8       | 41      | E    | 0           | 299233.231   | -0.006                     | 336.5219  |
| 50   | 9      | 42     | 49    | 8       | 41      | A    | 0           | 299238.970   | 0.001                      | 336.5176  |
| 54   | 4      | 50     | 53    | 4       | 49      | E    | 0           | 299243.989   | 0.009                      | 349.1993  |
| 54   | 5      | 50     | 53    | 5       | 49      | E    | 0           | 299243.989   | 0.009                      | 349.1993  |
| 54   | 4      | 50     | 53    | 4       | 49      | A    | 0           | 299247.194   | 0.013                      | 349.1931  |
| 54   | 4      | 50     | 53    | 5       | 49      | A    | 0           | 299247.194   | 0.013                      | 349.1931  |
| 54   | 5      | 50     | 53    | 4       | 49      | A    | 0           | 299247.194   | 0.013                      | 349.1931  |
| 54   | 5      | 50     | 53    | 5       | 49      | A    | 0           | 299247.194   | 0.013                      | 349.1931  |
| 55   | 3      | 52     | 54    | 3       | 51      | A    | 1           | 299257.659   | -0.167                     | 479.7494  |
| 55   | 3      | 52     | 54    | 4       | 51      | A    | 1           | 299257.659   | -0.167                     | 479.7494  |
| 55   | 4      | 52     | 54    | 3       | 51      | A    | 1           | 299257.659   | -0.167                     | 479.7494  |
| 55   | 4      | 52     | 54    | 4       | 51      | A    | 1           | 299257.659   | -0.167                     | 479.7494  |
| 18   | 17     | 1      | 17    | 16      | 1       | E    | 0           | 299272.469   | -0.086                     | 147.4613  |
| 50   | 27     | 24     | 50    | 26      | 25      | E    | 0           | 299274.517   | 0.030                      | 458.4877  |
| 18   | 17     | 2      | 17    | 16      | 2       | E    | 0           | 299288.011   | 0.020                      | 147.4480  |
| 18   | 17     | 2      | 17    | 16      | 1       | A    | 0           | 299319.157   | -0.032                     | 147.4578  |
| 18   | 17     | 1      | 17    | 16      | 2       | A    | 0           | 299319.157   | -0.032                     | 147.4578  |
| 55   | 3      | 52     | 54    | 3       | 51      | E    | 1           | 299342.632   | -0.005                     | 479.5228  |
| 55   | 3      | 52     | 54    | 4       | 51      | E    | 1           | 299342.632   | -0.005                     | 479.5228  |
| 55   | 4      | 52     | 54    | 3       | 51      | E    | 1           | 299342.632   | -0.005                     | 479.5228  |
| 55   | 4      | 52     | 54    | 4       | 51      | E    | 1           | 299342.632   | -0.005                     | 479.5228  |
| 49   | 10     | 40     | 48    | 10      | 39      | A    | 1           | 299371.690   | 0.147                      | 460.4974  |
| 49   | 9      | 40     | 48    | 10      | 39      | E    | 1           | 299380.096   | 0.042                      | 460.3632  |
| 55   | 3      | 52     | 54    | 3       | 51      | E    | 0           | 299406.528   | -0.000                     | 351.2293  |
| 55   | 4      | 52     | 54    | 4       | 51      | E    | 0           | 299406.528   | -0.000                     | 351.2293  |
| 55   | 3      | 52     | 54    | 3       | 51      | A    | 0           | 299409.161   | 0.027                      | 351.2222  |
| 55   | 3      | 52     | 54    | 4       | 51      | A    | 0           | 299409.161   | 0.027                      | 351.2222  |
| 55   | 4      | 52     | 54    | 3       | 51      | A    | 0           | 299409.161   | 0.027                      | 351.2222  |
| 55   | 4      | 52     | 54    | 4       | 51      | A    | 0           | 299409.161   | 0.027                      | 351.2222  |
| 48   | 21     | 28     | 47    | 21      | 27      | A    | 0           | 299414.004   | 0.145                      | 383.9978  |
| 48   | 21     | 27     | 47    | 21      | 26      | A    | 0           | 299414.004   | 0.144                      | 383.9978  |
| 48   | 21     | 27     | 47    | 21      | 26      | E    | 0           | 299416.489   | 0.039                      | 383.9944  |
| 49   | 9      | 40     | 48    | 10      | 39      | E    | 0           | 299431.998   | -0.015                     | 332.0651  |
| 49   | 9      | 40     | 48    | 10      | 39      | A    | 0           | 299437.529   | -0.009                     | 332.0609  |
| 56   | 2      | 54     | 55    | 2       | 53      | A    | 1           | 299458.226   | -0.047                     | 481.3859  |
| 56   | 2      | 54     | 55    | 3       | 53      | A    | 1           | 299458.226   | -0.047                     | 481.3859  |
| 56   | 3      | 54     | 55    | 2       | 53      | A    | 1           | 299458.226   | -0.047                     | 481.3859  |
| 56   | 3      | 54     | 55    | 3       | 53      | A    | 1           | 299458.226   | -0.047                     | 481.3859  |
| 56   | 2      | 54     | 55    | 2       | 53      | E    | 1           | 299521.663   | 0.021                      | 481.1223  |
| 56   | 3      | 54     | 55    | 3       | 53      | E    | 1           | 299521.663   | 0.021                      | 481.1223  |
| 49   | 27     | 22     | 49    | 26      | 23      | E    | 0           | 299525.687   | -0.049                     | 448.1443  |
| 49   | 27     | 23     | 49    | 26      | 24      | A    | 0           | 299555.305   | -0.042                     | 448.1544  |
| 49   | 27     | 22     | 49    | 26      | 23      | A    | 0           | 299555.305   | -0.042                     | 448.1544  |
| 49   | 10     | 40     | 48    | 10      | 39      | E    | 1           | 299580.488   | -0.008                     | 460.3632  |
| 56   | 2      | 54     | 55    | 2       | 53      | E    | 0           | 299588.537   | 0.014                      | 352.8356  |
| 56   | 3      | 54     | 55    | 3       | 53      | E    | 0           | 299588.537   | 0.014                      | 352.8356  |
| 56   | 2      | 54     | 55    | 2       | 53      | A    | 0           | 299590.473   | 0.006                      | 352.8273  |
| 56   | 2      | 54     | 55    | 3       | 53      | A    | 0           | 299590.473   | 0.006                      | 352.8273  |
| 56   | 3      | 54     | 55    | 2       | 53      | A    | 0           | 299590.473   | 0.006                      | 352.8273  |
| 56   | 3      | 54     | 55    | 3       | 53      | A    | 0           | 299590.473   | 0.006                      | 352.8273  |
| 49   | 10     | 40     | 48    | 10      | 39      | E    | 0           | 299619.990   | 0.090                      | 332.0651  |
| 49   | 10     | 40     | 48    | 10      | 39      | A    | 0           | 299626.368   | 0.021                      | 332.0609  |
| 49   | 10     | 40     | 48    | 9       | 39      | A    | 1           | 299668.139   | 0.167                      | 460.4876  |
| 57   | 1      | 56     | 56    | 1       | 55      | A    | 1           | 299672.157   | 0.017                      | 482.6136  |
| 57   | 1      | 56     | 56    | 2       | 55      | A    | 1           | 299672.157   | 0.017                      | 482.6136  |
| 57   | 2      | 56     | 56    | 1       | 55      | A    | 1           | 299672.157   | 0.017                      | 482.6136  |
| 57   | 2      | 56     | 56    | 2       | 55      | A    | 1           | 299672.157   | 0.017                      | 482.6136  |
| 57   | 1      | 56     | 56    | 1       | 55      | E    | 1           | 299710.864   | 0.047                      | 482.3054  |
| 57   | 2      | 56     | 56    | 2       | 55      | E    | 1           | 299710.864   | 0.047                      | 482.3054  |
| 49   | 9      | 40     | 48    | 9       | 39      | E    | 1           | 299721.045   | -0.016                     | 460.3518  |
| 49   | 9      | 40     | 48    | 9       | 39      | E    | 0           | 299752.739   | 0.131                      | 332.0544  |
| 49   | 9      | 40     | 48    | 9       | 39      | A    | 0           | 299759.620   | -0.027                     | 332.0501  |
| 57   | 1      | 56     | 56    | 1       | 55      | E    | 0           | 299781.491   | -0.023                     | 354.0276  |
| 57   | 2      | 56     | 56    | 2       | 55      | E    | 0           | 299781.491   | -0.023                     | 354.0276  |
| 57   | 1      | 56     | 56    | 1       | 55      | A    | 0           | 299782.743   | 0.042                      | 354.0180  |
| 57   | 1      | 56     | 56    | 2       | 55      | A    | 0           | 299782.743   | 0.042                      | 354.0180  |
| 57   | 2      | 56     | 56    | 1       | 55      | A    | 0           | 299782.743   | 0.042                      | 354.0180  |
| 57   | 2      | 56     | 56    | 2       | 55      | A    | 0           | 299782.743   | 0.042                      | 354.0180  |
| 48   | 27     | 21     | 48    | 26      | 22      | E    | 0           | 299805.693   | -0.138                     | 438.0104  |
| 48   | 27     | 22     | 48    | 26      | 23      | A    | 0           | 299835.229   | -0.032                     | 438.0206  |
| 48   | 27     | 21     | 48    | 26      | 22      | A    | 0           | 299835.229   | -0.032                     | 438.0206  |
| 48   | 27     | 22     | 48    | 26      | 23      | E    | 0           | 299852.797   | -0.024                     | 438.0081  |
| 58   | 0      | 58     | 57    | 0       | 57      | A    | 1           | 299894.635   | 0.112                      | 483.4405  |



| $J'$ | $K'_a$ | $K'_c$ | $J''$ | $K''_a$ | $K''_c$ | Sym. | $v_{tCH_3}$ | $\nu_{Obs.}$ | $\nu_{Obs.} - \nu_{Calc.}$ | $E_{low}$ |
|------|--------|--------|-------|---------|---------|------|-------------|--------------|----------------------------|-----------|
| 58   | 0      | 58     | 57    | 1       | 57      | A    | 1           | 299894.635   | 0.112                      | 483.4405  |
| 58   | 1      | 58     | 57    | 0       | 57      | A    | 1           | 299894.635   | 0.112                      | 483.4405  |
| 58   | 1      | 58     | 57    | 1       | 57      | A    | 1           | 299894.635   | 0.112                      | 483.4405  |
| 58   | 0      | 58     | 57    | 0       | 57      | E    | 1           | 299904.269   | 0.042                      | 483.0794  |
| 58   | 1      | 58     | 57    | 1       | 57      | E    | 1           | 299904.269   | 0.042                      | 483.0794  |
| 49   | 10     | 40     | 48    | 9       | 39      | E    | 1           | 299921.526   | 0.022                      | 460.3518  |
| 49   | 10     | 40     | 48    | 9       | 39      | E    | 0           | 299940.413   | -0.081                     | 332.0544  |
| 49   | 10     | 40     | 48    | 9       | 39      | A    | 0           | 299948.424   | -0.031                     | 332.0501  |
| 58   | 0      | 58     | 57    | 0       | 57      | A    | 0           | 299980.076   | -0.146                     | 354.8015  |
| 58   | 0      | 58     | 57    | 1       | 57      | A    | 0           | 299980.076   | -0.146                     | 354.8015  |
| 58   | 1      | 58     | 57    | 0       | 57      | A    | 0           | 299980.076   | -0.146                     | 354.8015  |
| 58   | 1      | 58     | 57    | 1       | 57      | A    | 0           | 299980.076   | -0.146                     | 354.8015  |
| 58   | 0      | 58     | 57    | 0       | 57      | E    | 0           | 299980.076   | 0.162                      | 354.8127  |
| 58   | 1      | 58     | 57    | 1       | 57      | E    | 0           | 299980.076   | 0.162                      | 354.8127  |
| 48   | 20     | 28     | 47    | 20      | 27      | A    | 0           | 300008.496   | -0.047                     | 376.3930  |
| 48   | 20     | 29     | 47    | 20      | 28      | A    | 0           | 300008.496   | -0.043                     | 376.3930  |
| 48   | 20     | 29     | 47    | 20      | 28      | E    | 0           | 300011.643   | -0.161                     | 376.3810  |
| 47   | 27     | 20     | 47    | 26      | 21      | E    | 0           | 300068.650   | -0.108                     | 428.0882  |
| 48   | 11     | 38     | 47    | 11      | 37      | A    | 0           | 300105.037   | 0.029                      | 326.9966  |
| 47   | 27     | 21     | 47    | 26      | 22      | E    | 0           | 300115.790   | -0.020                     | 428.0859  |
| 20   | 16     | 4      | 19    | 15      | 4       | E    | 0           | 300132.289   | -0.079                     | 149.1589  |
| 20   | 16     | 5      | 19    | 15      | 5       | E    | 0           | 300142.488   | 0.054                      | 149.1453  |
| 46   | 13     | 33     | 45    | 13      | 32      | A    | 0           | 300170.165   | -0.104                     | 316.1672  |
| 20   | 16     | 4      | 19    | 15      | 5       | A    | 0           | 300177.597   | -0.013                     | 149.1539  |
| 20   | 16     | 5      | 19    | 15      | 4       | A    | 0           | 300177.597   | -0.013                     | 149.1539  |
| 46   | 13     | 33     | 45    | 13      | 32      | E    | 0           | 300184.354   | -0.005                     | 316.1714  |
| 47   | 14     | 34     | 46    | 14      | 33      | A    | 0           | 300250.536   | -0.093                     | 330.0579  |
| 47   | 14     | 34     | 46    | 14      | 33      | E    | 0           | 300259.833   | 0.007                      | 330.0594  |
| 43   | 11     | 33     | 42    | 10      | 32      | E    | 0           | 300271.244   | 0.140                      | 278.6970  |
| 46   | 27     | 19     | 46    | 26      | 20      | E    | 0           | 300315.305   | -0.012                     | 418.3772  |
| 43   | 11     | 33     | 42    | 10      | 32      | A    | 0           | 300338.759   | -0.005                     | 278.6898  |
| 46   | 27     | 20     | 46    | 26      | 21      | A    | 0           | 300344.365   | -0.049                     | 418.3875  |
| 46   | 27     | 19     | 46    | 26      | 20      | A    | 0           | 300344.365   | -0.049                     | 418.3875  |
| 49   | 11     | 38     | 48    | 12      | 37      | A    | 0           | 300406.478   | -0.050                     | 341.5614  |
| 49   | 11     | 38     | 48    | 12      | 37      | E    | 0           | 300435.483   | 0.000                      | 341.5654  |
| 45   | 27     | 18     | 45    | 26      | 19      | E    | 0           | 300546.229   | -0.047                     | 408.8772  |
| 45   | 27     | 19     | 45    | 26      | 20      | A    | 0           | 300575.093   | -0.126                     | 408.8876  |
| 45   | 27     | 18     | 45    | 26      | 19      | A    | 0           | 300575.093   | -0.126                     | 408.8876  |
| 45   | 27     | 19     | 45    | 26      | 20      | E    | 0           | 300593.449   | 0.016                      | 460.4605  |
| 65   | 3      | 62     | 65    | 2       | 63      | E    | 0           | 300636.960   | 0.031                      | 460.4605  |
| 65   | 4      | 62     | 65    | 3       | 63      | E    | 0           | 300636.960   | 0.031                      | 460.4605  |
| 65   | 3      | 62     | 65    | 2       | 63      | A    | 0           | 300680.543   | 0.579                      | 460.4529  |
| 65   | 4      | 62     | 65    | 3       | 63      | A    | 0           | 300680.543   | 0.579                      | 460.4529  |
| 48   | 19     | 30     | 47    | 19      | 29      | E    | 0           | 300715.986   | -0.006                     | 369.2070  |
| 48   | 19     | 29     | 47    | 19      | 28      | E    | 0           | 300718.882   | -0.107                     | 369.2068  |
| 48   | 19     | 30     | 47    | 19      | 29      | E    | 0           | 300720.029   | 0.066                      | 369.1958  |
| 44   | 27     | 18     | 44    | 26      | 19      | A    | 0           | 300791.120   | -0.053                     | 399.5983  |
| 44   | 27     | 17     | 44    | 26      | 18      | A    | 0           | 300791.120   | -0.053                     | 399.5983  |
| 44   | 27     | 18     | 44    | 26      | 19      | E    | 0           | 300809.576   | -0.000                     | 399.5857  |
| 47   | 13     | 35     | 46    | 13      | 34      | A    | 0           | 300874.755   | -0.060                     | 325.6076  |
| 47   | 13     | 35     | 46    | 13      | 34      | E    | 0           | 300877.614   | -0.117                     | 325.6108  |
| 30   | 11     | 19     | 29    | 10      | 19      | E    | 0           | 300927.826   | -0.095                     | 176.6749  |
| 22   | 15     | 7      | 21    | 14      | 7       | E    | 0           | 300955.572   | -0.002                     | 152.0860  |
| 22   | 15     | 8      | 21    | 14      | 8       | E    | 0           | 300960.058   | 0.013                      | 152.0723  |
| 43   | 27     | 16     | 43    | 26      | 17      | E    | 0           | 300964.194   | -0.129                     | 390.5090  |
| 70   | 28     | 43     | 70    | 27      | 44      | E    | 0           | 300986.702   | -0.210                     | 720.0892  |
| 43   | 27     | 17     | 43    | 26      | 18      | A    | 0           | 300992.627   | -0.358                     | 390.5195  |
| 43   | 27     | 16     | 43    | 26      | 17      | A    | 0           | 300992.627   | -0.358                     | 390.5195  |
| 22   | 15     | 8      | 21    | 14      | 7       | A    | 0           | 300998.757   | -0.027                     | 152.0796  |
| 22   | 15     | 7      | 21    | 14      | 8       | A    | 0           | 300998.757   | -0.027                     | 152.0796  |
| 43   | 27     | 17     | 43    | 26      | 18      | E    | 0           | 301011.519   | -0.046                     | 390.5068  |
| 42   | 27     | 15     | 42    | 26      | 16      | E    | 0           | 301152.775   | -0.033                     | 381.6403  |
| 47   | 11     | 37     | 46    | 10      | 36      | E    | 0           | 301177.407   | -0.152                     | 316.9548  |
| 42   | 27     | 16     | 42    | 26      | 17      | A    | 0           | 301181.304   | -0.038                     | 381.6507  |
| 42   | 27     | 15     | 42    | 26      | 16      | A    | 0           | 301181.304   | -0.038                     | 381.6507  |
| 42   | 27     | 16     | 42    | 26      | 17      | E    | 0           | 301200.139   | 0.054                      | 381.6381  |
| 47   | 11     | 37     | 46    | 10      | 36      | A    | 0           | 301205.741   | -0.024                     | 316.9495  |
| 30   | 11     | 20     | 29    | 10      | 20      | E    | 0           | 301320.741   | -0.019                     | 176.6487  |
| 41   | 27     | 14     | 41    | 26      | 15      | E    | 0           | 301328.476   | -0.015                     | 372.9814  |
| 41   | 27     | 15     | 41    | 26      | 16      | A    | 0           | 301356.863   | -0.039                     | 372.9919  |
| 41   | 27     | 14     | 41    | 26      | 15      | A    | 0           | 301356.863   | -0.039                     | 372.9919  |
| 41   | 27     | 15     | 41    | 26      | 16      | E    | 0           | 301375.851   | 0.054                      | 372.9792  |
| 40   | 27     | 13     | 40    | 26      | 14      | E    | 0           | 301492.003   | -0.002                     | 364.5321  |
| 70   | 6      | 64     | 70    | 5       | 65      | E    | 1           | 301504.982   | -0.111                     | 680.7125  |
| 70   | 7      | 64     | 70    | 6       | 65      | E    | 1           | 301504.982   | -0.111                     | 680.7125  |
| 40   | 27     | 14     | 40    | 26      | 15      | A    | 0           | 301520.099   | -0.204                     | 364.5426  |
| 40   | 27     | 13     | 40    | 26      | 14      | A    | 0           | 301520.099   | -0.204                     | 364.5426  |
| 40   | 27     | 14     | 40    | 26      | 15      | E    | 0           | 301539.336   | -0.002                     | 364.5299  |
| 70   | 6      | 64     | 70    | 5       | 65      | A    | 0           | 301559.878   | -0.078                     | 552.4527  |
| 70   | 7      | 64     | 70    | 6       | 65      | A    | 0           | 301559.878   | -0.078                     | 552.4527  |
| 48   | 18     | 30     | 47    | 18      | 29      | E    | 0           | 301576.025   | 0.032                      | 362.4517  |
| 48   | 18     | 31     | 47    | 18      | 30      | E    | 0           | 301577.546   | -0.068                     | 362.4401  |
| 48   | 10     | 38     | 47    | 10      | 37      | E    | 0           | 301578.850   | 0.030                      | 326.8668  |
| 30   | 11     | 19     | 29    | 10      | 20      | A    | 0           | 301583.424   | -0.011                     | 176.6445  |
| 48   | 10     | 38     | 47    | 10      | 37      | A    | 0           | 301590.369   | 0.146                      | 326.8619  |
| 39   | 27     | 12     | 39    | 26      | 13      | E    | 0           | 301643.963   | -0.003                     | 356.2922  |
| 39   | 27     | 13     | 39    | 26      | 14      | A    | 0           | 301672.081   | -0.075                     | 356.3027  |
| 39   | 27     | 12     | 39    | 26      | 13      | A    | 0           | 301672.081   | -0.075                     | 356.3027  |
| 24   | 14     | 11     | 23    | 13      | 11      | E    | 0           | 301683.817   | -0.005                     | 156.2462  |
| 24   | 14     | 10     | 23    | 13      | 10      | E    | 0           | 301685.134   | -0.059                     | 156.2598  |
| 39   | 27     | 13     | 39    | 26      | 14      | E    | 0           | 301691.335   | 0.014                      | 356.2900  |
| 30   | 11     | 19     | 29    | 10      | 20      | E    | 0           | 301713.463   | -0.093                     | 176.6487  |
| 24   | 14     | 10     | 23    | 13      | 11      | A    | 0           | 301725.720   | -0.010                     | 156.2520  |
| 24   | 14     | 11     | 23    | 13      | 10      | A    | 0           | 301725.720   | -0.010                     | 156.2520  |
| 69   | 28     | 41     | 69    | 27      | 42      | A    | 0           | 301771.521   | -0.002                     | 705.4624  |
| 69   | 28     | 42     | 69    | 27      | 43      | A    | 0           | 301771.521   | -0.003                     | 705.4624  |
| 38   | 27     | 12     | 38    | 26      | 13      | A    | 0           | 301812.977   | -0.078                     | 348.2719  |
| 38   | 27     | 11     | 38    | 26      | 12      | A    | 0           | 301812.977   | -0.078                     | 348.2719  |
| 38   | 27     | 12     | 38    | 26      | 13      | E    | 0           | 301832.385   | 0.046                      | 348.2592  |
| 37   | 27     | 10     | 37    | 26      | 11      | E    | 0           | 301915.735   | 0.158                      | 340.4394  |
| 37   | 27     | 11     | 37    | 26      | 12      | A    | 0           | 301943.569   | -0.002                     | 340.4500  |
| 37   | 27     | 10     | 37    | 26      | 11      | A    | 0           | 301943.569   | -0.002                     | 340.4500  |
| 37   | 27     | 11     | 37    | 26      | 12      | E    | 0           | 301963.016   | 0.051                      | 340.4372  |
| 36   | 27     | 9      | 36    | 26      | 10      | E    | 0           | 302036.388   | 0.040                      | 332.8260  |
| 36   | 27     | 10     | 36    | 26      | 11      | A    | 0           | 302064.175   | -0.079                     | 332.8366  |
| 36   | 27     | 9      | 36    | 26      | 10      | A    | 0           | 302064.175   | -0.079                     | 332.8366  |
| 36   | 27     | 10     | 36    | 26      | 11      | E    | 0           | 302083.806   | 0.057                      | 332.8239  |
| 35   | 27     | 8      | 35    | 26      | 9       | E    | 0           | 302147.845   | 0.030                      | 325.4211  |
| 35   | 27     | 9      | 35    | 26      | 10      | A    | 0           | 302175.586   | -0.052                     | 325.4317  |
| 35   | 27     | 8      | 35    | 26      | 9       | A    | 0           | 302175.586   | -0.052                     | 325.4317  |
| 26   | 13     | 14     | 25    | 12      | 14      | E    | 0           | 302195.460   | -0.055                     | 161.6950  |
| 26   | 13     | 13     | 25    | 12      | 13      | E    | 0           | 302203.047   | -0.054                     | 161.7083  |
| 28   | 12     | 17     | 27    | 11      | 17      | E    | 0           | 302233.907   | -0.005                     | 168.4671  |
| 26   | 13     | 14     | 25    | 12      | 13      | A    | 0           | 302240.310   | 0.061                      | 161.6992  |
| 28   | 12     | 16     | 27    | 11      | 16      | E    | 0           | 302248.222   | -0.061                     | 168.4798  |
| 34   | 27     | 7      | 34    | 26      | 8       | E    | 0           | 302250.516   | 0.027                      | 318.2243  |



| $J'$ | $K'_a$ | $K'_c$ | $J''$ | $K''_a$ | $K''_c$ | Sym. | $v_{tCH_3}$ | $\nu_{Obs.}$ | $\nu_{Obs.} - \nu_{Calc.}$ | $E_{low}$ |
|------|--------|--------|-------|---------|---------|------|-------------|--------------|----------------------------|-----------|
| 28   | 12     | 17     | 27    | 11      | 16      | A    | 0           | 302273.559   | -0.069                     | 168.4697  |
| 34   | 27     | 8      | 34    | 26      | 9       | A    | 0           | 302278.181   | -0.054                     | 318.2350  |
| 34   | 27     | 7      | 34    | 26      | 8       | A    | 0           | 302278.181   | -0.054                     | 318.2350  |
| 28   | 12     | 16     | 27    | 11      | 17      | A    | 0           | 302289.542   | 0.014                      | 168.4692  |
| 34   | 27     | 8      | 34    | 26      | 9       | E    | 0           | 302297.948   | 0.042                      | 318.2223  |
| 33   | 27     | 6      | 33    | 26      | 7       | E    | 0           | 302344.881   | 0.012                      | 311.2356  |
| 47   | 14     | 33     | 46    | 14      | 32      | A    | 0           | 302351.138   | -0.047                     | 330.1669  |
| 47   | 14     | 33     | 46    | 14      | 32      | E    | 0           | 302358.588   | -0.025                     | 330.1693  |
| 33   | 27     | 7      | 33    | 26      | 8       | A    | 0           | 302372.531   | -0.011                     | 311.2462  |
| 33   | 27     | 6      | 33    | 26      | 7       | A    | 0           | 302372.531   | -0.011                     | 311.2462  |
| 46   | 11     | 35     | 45    | 11      | 34      | E    | 0           | 302388.263   | -0.125                     | 310.3969  |
| 33   | 27     | 7      | 33    | 26      | 8       | E    | 0           | 302392.302   | 0.014                      | 311.2335  |
| 46   | 11     | 35     | 45    | 11      | 34      | A    | 0           | 302400.623   | -0.043                     | 310.3899  |
| 32   | 27     | 5      | 32    | 26      | 6       | E    | 0           | 302431.467   | 0.037                      | 304.4545  |
| 32   | 27     | 6      | 32    | 26      | 7       | A    | 0           | 302458.996   | -0.040                     | 304.4652  |
| 32   | 27     | 5      | 32    | 26      | 6       | A    | 0           | 302458.996   | -0.040                     | 304.4652  |
| 68   | 28     | 40     | 68    | 27      | 41      | E    | 0           | 302498.913   | -0.077                     | 691.0349  |
| 31   | 27     | 4      | 31    | 26      | 5       | E    | 0           | 302510.573   | -0.063                     | 297.8811  |
| 68   | 28     | 40     | 68    | 27      | 41      | A    | 0           | 302529.382   | -0.016                     | 691.0441  |
| 68   | 28     | 41     | 68    | 27      | 42      | A    | 0           | 302529.382   | -0.017                     | 691.0441  |
| 31   | 27     | 5      | 31    | 26      | 6       | A    | 0           | 302538.109   | -0.071                     | 297.8918  |
| 31   | 27     | 4      | 31    | 26      | 5       | A    | 0           | 302538.109   | -0.071                     | 297.8918  |
| 68   | 28     | 41     | 68    | 27      | 42      | E    | 0           | 302543.878   | -0.228                     | 691.0332  |
| 31   | 27     | 5      | 31    | 26      | 6       | E    | 0           | 302558.276   | 0.218                      | 297.8791  |
| 48   | 17     | 32     | 47    | 17      | 31      | A    | 0           | 302631.504   | 0.007                      | 356.1370  |
| 48   | 17     | 32     | 47    | 17      | 31      | E    | 0           | 302641.397   | -0.075                     | 356.1282  |
| 29   | 27     | 3      | 29    | 26      | 4       | E    | 0           | 302696.245   | 0.080                      | 285.3541  |
| 49   | 29     | 21     | 48    | 29      | 20      | A    | 0           | 303048.083   | 0.039                      | 469.2003  |
| 49   | 29     | 20     | 48    | 29      | 19      | A    | 0           | 303048.083   | 0.039                      | 469.2003  |
| 49   | 29     | 20     | 48    | 29      | 19      | E    | 0           | 303048.083   | -0.275                     | 469.1901  |
| 49   | 29     | 21     | 48    | 29      | 20      | E    | 0           | 303049.385   | 0.063                      | 469.1877  |
| 42   | 11     | 32     | 41    | 10      | 31      | E    | 0           | 303060.338   | -0.058                     | 269.4905  |
| 67   | 28     | 39     | 67    | 27      | 40      | E    | 0           | 303219.021   | -0.165                     | 676.8353  |
| 67   | 28     | 39     | 67    | 27      | 40      | A    | 0           | 303249.122   | -0.045                     | 676.8446  |
| 67   | 28     | 40     | 67    | 27      | 41      | A    | 0           | 303249.122   | -0.045                     | 676.8446  |
| 67   | 28     | 40     | 67    | 27      | 41      | E    | 0           | 303264.464   | -0.056                     | 676.8336  |
| 49   | 28     | 21     | 48    | 28      | 20      | A    | 0           | 303273.359   | 0.079                      | 458.4158  |
| 49   | 28     | 22     | 48    | 28      | 21      | A    | 0           | 303273.359   | 0.079                      | 458.4158  |
| 49   | 28     | 22     | 48    | 28      | 21      | E    | 0           | 303274.750   | 0.023                      | 458.4038  |
| 64   | 2      | 62     | 64    | 1       | 63      | E    | 0           | 303297.769   | 0.066                      | 438.8119  |
| 64   | 3      | 62     | 64    | 2       | 63      | E    | 0           | 303297.769   | 0.066                      | 438.8119  |
| 49   | 27     | 23     | 48    | 27      | 22      | A    | 0           | 303523.664   | -0.028                     | 448.0221  |
| 49   | 27     | 22     | 48    | 27      | 21      | A    | 0           | 303523.664   | -0.028                     | 448.0221  |
| 49   | 27     | 22     | 48    | 27      | 21      | E    | 0           | 303525.395   | 0.081                      | 448.0109  |
| 49   | 10     | 39     | 48    | 11      | 38      | A    | 0           | 303616.797   | 0.031                      | 337.0071  |
| 49   | 10     | 39     | 48    | 11      | 38      | E    | 0           | 303616.797   | -0.091                     | 337.0112  |
| 66   | 28     | 38     | 66    | 27      | 39      | E    | 0           | 303903.004   | -0.075                     | 662.8538  |
| 66   | 28     | 38     | 66    | 27      | 39      | A    | 0           | 303932.627   | -0.025                     | 662.8633  |
| 66   | 28     | 39     | 66    | 27      | 40      | A    | 0           | 303932.627   | -0.025                     | 662.8633  |
| 52   | 7      | 45     | 51    | 7       | 44      | A    | 1           | 303937.647   | -0.098                     | 478.8359  |
| 52   | 7      | 45     | 51    | 8       | 44      | A    | 1           | 303937.647   | 0.232                      | 478.8359  |
| 52   | 8      | 45     | 51    | 7       | 44      | A    | 1           | 303937.647   | -0.273                     | 478.8359  |
| 52   | 8      | 45     | 51    | 8       | 44      | A    | 1           | 303937.647   | 0.058                      | 478.8359  |
| 66   | 28     | 39     | 66    | 27      | 40      | E    | 0           | 303948.492   | -0.125                     | 662.8522  |
| 53   | 6      | 47     | 52    | 6       | 46      | A    | 1           | 303953.236   | -0.045                     | 482.2412  |
| 53   | 6      | 47     | 52    | 7       | 46      | A    | 1           | 303953.236   | -0.035                     | 482.2412  |
| 53   | 7      | 47     | 52    | 6       | 46      | A    | 1           | 303953.236   | -0.049                     | 482.2412  |
| 53   | 7      | 47     | 52    | 7       | 46      | A    | 1           | 303953.236   | -0.040                     | 482.2412  |
| 48   | 16     | 33     | 47    | 16      | 32      | A    | 0           | 303962.177   | -0.109                     | 350.2878  |
| 48   | 16     | 33     | 47    | 16      | 32      | E    | 0           | 303995.697   | -0.070                     | 350.2818  |
| 51   | 12     | 39     | 50    | 13      | 38      | E    | 0           | 303999.584   | -0.028                     | 366.9983  |
| 48   | 16     | 32     | 47    | 16      | 31      | E    | 0           | 304019.031   | -0.053                     | 350.2943  |
| 48   | 16     | 32     | 47    | 16      | 31      | A    | 0           | 304041.533   | -0.028                     | 350.2909  |
| 54   | 5      | 49     | 53    | 5       | 48      | A    | 1           | 304051.320   | -0.096                     | 485.1788  |
| 54   | 5      | 49     | 53    | 6       | 48      | A    | 1           | 304051.320   | -0.096                     | 485.1788  |
| 54   | 6      | 49     | 53    | 5       | 48      | A    | 1           | 304051.320   | -0.096                     | 485.1788  |
| 54   | 6      | 49     | 53    | 6       | 48      | A    | 1           | 304051.320   | -0.096                     | 485.1788  |
| 51   | 8      | 43     | 50    | 9       | 42      | A    | 1           | 304055.385   | 0.058                      | 474.9319  |
| 51   | 9      | 43     | 50    | 9       | 42      | A    | 1           | 304060.173   | -0.005                     | 474.9319  |
| 51   | 8      | 43     | 50    | 8       | 42      | A    | 1           | 304064.219   | 0.072                      | 474.9316  |
| 51   | 9      | 43     | 50    | 8       | 42      | A    | 1           | 304069.066   | 0.067                      | 474.9316  |
| 53   | 6      | 47     | 52    | 6       | 46      | E    | 1           | 304091.304   | -0.010                     | 482.0923  |
| 53   | 6      | 47     | 52    | 7       | 46      | E    | 1           | 304091.304   | 0.001                      | 482.0923  |
| 53   | 7      | 47     | 52    | 6       | 46      | E    | 1           | 304091.304   | -0.016                     | 482.0923  |
| 53   | 7      | 47     | 52    | 7       | 46      | E    | 1           | 304091.304   | -0.004                     | 482.0923  |
| 52   | 7      | 45     | 51    | 7       | 44      | E    | 1           | 304094.177   | -0.086                     | 478.7003  |
| 52   | 7      | 45     | 51    | 8       | 44      | E    | 1           | 304094.177   | 0.317                      | 478.7003  |
| 52   | 8      | 45     | 51    | 7       | 44      | E    | 1           | 304094.177   | -0.299                     | 478.7003  |
| 52   | 8      | 45     | 51    | 8       | 44      | E    | 1           | 304094.177   | 0.103                      | 478.7003  |
| 49   | 25     | 25     | 48    | 25      | 24      | A    | 0           | 304118.320   | -0.050                     | 428.4135  |
| 49   | 25     | 24     | 48    | 25      | 23      | A    | 0           | 304118.320   | -0.050                     | 428.4135  |
| 48   | 11     | 38     | 47    | 10      | 37      | E    | 0           | 304122.188   | -0.254                     | 326.8668  |
| 48   | 11     | 38     | 47    | 10      | 37      | A    | 0           | 304144.065   | -0.053                     | 326.8619  |
| 54   | 5      | 49     | 53    | 5       | 48      | E    | 1           | 304172.210   | -0.015                     | 485.0109  |
| 54   | 5      | 49     | 53    | 6       | 48      | E    | 1           | 304172.210   | -0.014                     | 485.0109  |
| 54   | 6      | 49     | 53    | 5       | 48      | E    | 1           | 304172.210   | -0.015                     | 485.0109  |
| 54   | 6      | 49     | 53    | 6       | 48      | E    | 1           | 304172.210   | -0.014                     | 485.0109  |
| 55   | 4      | 51     | 54    | 4       | 50      | A    | 1           | 304200.230   | -0.109                     | 487.6703  |
| 55   | 4      | 51     | 54    | 5       | 50      | A    | 1           | 304200.230   | -0.109                     | 487.6703  |
| 55   | 5      | 51     | 54    | 4       | 50      | A    | 1           | 304200.230   | -0.109                     | 487.6703  |
| 55   | 5      | 51     | 54    | 5       | 50      | A    | 1           | 304200.230   | -0.109                     | 487.6703  |
| 54   | 5      | 49     | 53    | 5       | 48      | E    | 0           | 304233.208   | -0.016                     | 356.7109  |
| 54   | 6      | 49     | 53    | 6       | 48      | E    | 0           | 304233.208   | -0.016                     | 356.7109  |
| 54   | 5      | 49     | 53    | 5       | 48      | A    | 0           | 304236.967   | 0.016                      | 356.7056  |
| 54   | 5      | 49     | 53    | 6       | 48      | A    | 0           | 304236.967   | 0.017                      | 356.7056  |
| 54   | 6      | 49     | 53    | 5       | 48      | A    | 0           | 304236.967   | 0.016                      | 356.7056  |
| 54   | 6      | 49     | 53    | 6       | 48      | A    | 0           | 304236.967   | 0.016                      | 356.7056  |
| 51   | 8      | 43     | 50    | 8       | 42      | E    | 1           | 304243.265   | 0.008                      | 474.8034  |
| 51   | 9      | 43     | 50    | 8       | 42      | E    | 1           | 304249.046   | -0.005                     | 474.8034  |
| 51   | 8      | 43     | 50    | 9       | 42      | A    | 0           | 304288.756   | -0.139                     | 346.4992  |
| 51   | 9      | 43     | 50    | 9       | 42      | E    | 0           | 304288.756   | -0.005                     | 346.5032  |
| 51   | 8      | 43     | 50    | 8       | 42      | E    | 0           | 304293.093   | -0.020                     | 346.5029  |
| 51   | 9      | 43     | 50    | 9       | 42      | A    | 0           | 304294.381   | 0.093                      | 346.4992  |
| 51   | 8      | 43     | 50    | 8       | 42      | A    | 0           | 304298.526   | -0.138                     | 346.4988  |
| 51   | 9      | 43     | 50    | 8       | 42      | E    | 0           | 304298.526   | 0.052                      | 346.5029  |
| 50   | 9      | 41     | 49    | 10      | 40      | A    | 1           | 304308.339   | -0.011                     | 470.4834  |
| 55   | 4      | 51     | 54    | 4       | 50      | E    | 0           | 304366.840   | 0.008                      | 359.1810  |
| 55   | 5      | 51     | 54    | 5       | 50      | E    | 0           | 304366.840   | 0.008                      | 359.1810  |
| 55   | 4      | 51     | 54    | 4       | 50      | A    | 0           | 304370.026   | 0.013                      | 359.1750  |
| 55   | 4      | 51     | 54    | 5       | 50      | A    | 0           | 304370.026   | 0.013                      | 359.1750  |
| 55   | 5      | 51     | 54    | 4       | 50      | A    | 0           | 304370.026   | 0.013                      | 359.1750  |
| 55   | 5      | 51     | 54    | 5       | 50      | A    | 0           | 304370.026   | 0.013                      | 359.1750  |
| 56   | 3      | 53     | 55    | 3       | 52      | A    | 1           | 304381.163   | -0.080                     | 489.7316  |
| 56   | 3      | 53     | 55    | 4       | 52      | A    | 1           | 304381.163   | -0.080                     | 489.7316  |
| 56   | 4      | 53     | 55    | 3       | 52      | A    | 1           | 304381.163   | -0.080                     | 489.7316  |
| 56   | 4      | 53     | 55    | 4       | 52      | A    | 1           | 304381.163   | -0.080                     | 489.7316  |



| $J'$ | $K'_a$ | $K'_c$ | $J''$ | $K''_a$ | $K''_c$ | Sym. | $v_{tCH_3}$ | $\nu_{Obs.}$ | $\nu_{Obs.} - \nu_{Calc.}$ | $E_{low}$ |
|------|--------|--------|-------|---------|---------|------|-------------|--------------|----------------------------|-----------|
| 50   | 10     | 41     | 49    | 10      | 40      | A    | 1           | 304408.713   | 0.200                      | 470.4834  |
| 56   | 3      | 53     | 55    | 3       | 52      | E    | 1           | 304465.694   | 0.017                      | 489.5078  |
| 56   | 4      | 53     | 55    | 4       | 52      | E    | 1           | 304465.694   | 0.017                      | 489.5078  |
| 49   | 24     | 25     | 48    | 24      | 24      | A    | 0           | 304474.638   | -0.032                     | 419.2030  |
| 49   | 24     | 26     | 48    | 24      | 25      | A    | 0           | 304474.638   | -0.032                     | 419.2030  |
| 50   | 9      | 41     | 49    | 9       | 40      | A    | 1           | 304481.811   | 0.278                      | 470.4776  |
| 50   | 9      | 41     | 49    | 10      | 40      | E    | 1           | 304497.096   | 0.070                      | 470.3561  |
| 56   | 3      | 53     | 55    | 3       | 52      | E    | 0           | 304531.204   | 0.002                      | 361.2164  |
| 56   | 4      | 53     | 55    | 4       | 52      | E    | 0           | 304531.204   | 0.002                      | 361.2164  |
| 56   | 3      | 53     | 55    | 3       | 52      | A    | 0           | 304533.795   | -0.002                     | 361.2094  |
| 56   | 3      | 53     | 55    | 4       | 52      | A    | 0           | 304533.795   | -0.002                     | 361.2094  |
| 56   | 4      | 53     | 55    | 3       | 52      | A    | 0           | 304533.795   | -0.002                     | 361.2094  |
| 56   | 4      | 53     | 55    | 4       | 52      | A    | 0           | 304533.795   | -0.002                     | 361.2094  |
| 50   | 9      | 41     | 49    | 10      | 40      | E    | 0           | 304547.240   | -0.009                     | 342.0594  |
| 57   | 2      | 55     | 56    | 2       | 54      | A    | 1           | 304582.463   | -0.036                     | 491.3748  |
| 57   | 2      | 55     | 56    | 3       | 54      | A    | 1           | 304582.463   | -0.036                     | 491.3748  |
| 57   | 3      | 55     | 56    | 2       | 54      | A    | 1           | 304582.463   | -0.036                     | 491.3748  |
| 57   | 3      | 55     | 56    | 3       | 54      | A    | 1           | 304582.463   | -0.036                     | 491.3748  |
| 50   | 10     | 41     | 49    | 10      | 40      | E    | 1           | 304613.718   | 0.063                      | 470.3561  |
| 57   | 2      | 55     | 56    | 2       | 54      | E    | 1           | 304645.701   | 0.022                      | 491.1132  |
| 57   | 3      | 55     | 56    | 3       | 54      | E    | 1           | 304645.701   | 0.022                      | 491.1132  |
| 50   | 10     | 41     | 49    | 10      | 40      | A    | 0           | 304662.534   | -0.062                     | 342.0553  |
| 57   | 2      | 55     | 56    | 2       | 54      | E    | 0           | 304714.089   | 0.015                      | 362.8288  |
| 57   | 3      | 55     | 56    | 3       | 54      | E    | 0           | 304714.089   | 0.015                      | 362.8288  |
| 57   | 2      | 55     | 56    | 2       | 54      | A    | 0           | 304716.018   | 0.006                      | 362.8206  |
| 57   | 2      | 55     | 56    | 3       | 54      | A    | 0           | 304716.018   | 0.006                      | 362.8206  |
| 57   | 3      | 55     | 56    | 2       | 54      | A    | 0           | 304716.018   | 0.006                      | 362.8206  |
| 57   | 3      | 55     | 56    | 3       | 54      | A    | 0           | 304716.018   | 0.006                      | 362.8206  |
| 50   | 9      | 41     | 49    | 9       | 40      | A    | 0           | 304741.939   | 0.095                      | 342.0490  |
| 48   | 12     | 37     | 47    | 12      | 36      | E    | 0           | 304770.782   | 0.021                      | 331.3994  |
| 48   | 12     | 37     | 47    | 12      | 36      | A    | 0           | 304774.230   | -0.088                     | 331.3953  |
| 58   | 1      | 57     | 57    | 1       | 56      | A    | 1           | 304796.781   | 0.021                      | 492.6096  |
| 58   | 1      | 57     | 57    | 2       | 56      | A    | 1           | 304796.781   | 0.021                      | 492.6096  |
| 58   | 2      | 57     | 57    | 1       | 56      | A    | 1           | 304796.781   | 0.021                      | 492.6096  |
| 58   | 2      | 57     | 57    | 2       | 56      | A    | 1           | 304796.781   | 0.021                      | 492.6096  |
| 50   | 10     | 41     | 49    | 9       | 40      | E    | 1           | 304814.094   | -0.004                     | 470.3494  |
| 58   | 1      | 57     | 57    | 1       | 56      | E    | 1           | 304835.405   | 0.056                      | 492.3027  |
| 58   | 2      | 57     | 57    | 2       | 56      | E    | 1           | 304835.405   | 0.056                      | 492.3027  |
| 50   | 10     | 41     | 49    | 9       | 40      | A    | 0           | 304851.356   | -0.048                     | 342.0490  |
| 58   | 1      | 57     | 57    | 2       | 56      | E    | 0           | 304907.442   | -0.024                     | 364.0272  |
| 58   | 2      | 57     | 57    | 1       | 56      | E    | 0           | 304907.442   | -0.024                     | 364.0272  |
| 58   | 1      | 57     | 57    | 1       | 56      | A    | 0           | 304908.699   | 0.048                      | 364.0177  |
| 58   | 1      | 57     | 57    | 2       | 56      | A    | 0           | 304908.699   | 0.048                      | 364.0177  |
| 58   | 2      | 57     | 57    | 1       | 56      | A    | 0           | 304908.699   | 0.048                      | 364.0177  |
| 58   | 2      | 57     | 57    | 2       | 56      | A    | 0           | 304908.699   | 0.048                      | 364.0177  |
| 59   | 0      | 59     | 58    | 0       | 58      | A    | 1           | 305019.539   | 0.144                      | 493.4439  |
| 59   | 0      | 59     | 58    | 1       | 58      | A    | 1           | 305019.539   | 0.144                      | 493.4439  |
| 59   | 1      | 59     | 58    | 0       | 58      | A    | 1           | 305019.539   | 0.144                      | 493.4439  |
| 59   | 1      | 59     | 58    | 0       | 58      | E    | 0           | 305029.058   | 0.044                      | 493.0831  |
| 59   | 1      | 59     | 58    | 1       | 58      | E    | 1           | 305029.058   | 0.044                      | 493.0831  |
| 59   | 0      | 59     | 58    | 0       | 58      | A    | 0           | 305106.220   | -0.141                     | 364.8078  |
| 59   | 0      | 59     | 58    | 1       | 58      | A    | 0           | 305106.220   | -0.141                     | 364.8078  |
| 59   | 1      | 59     | 58    | 0       | 58      | A    | 0           | 305106.220   | -0.141                     | 364.8078  |
| 59   | 1      | 59     | 58    | 1       | 58      | A    | 0           | 305106.220   | -0.141                     | 364.8078  |
| 59   | 0      | 59     | 58    | 0       | 58      | E    | 0           | 305106.220   | 0.164                      | 364.8190  |
| 59   | 1      | 59     | 58    | 1       | 58      | E    | 0           | 305106.220   | 0.164                      | 364.8190  |
| 49   | 11     | 39     | 48    | 11      | 38      | E    | 1           | 305157.754   | 0.204                      | 465.3021  |
| 49   | 22     | 27     | 48    | 22      | 26      | A    | 0           | 305348.286   | -0.075                     | 401.9846  |
| 49   | 22     | 28     | 48    | 22      | 27      | A    | 0           | 305348.286   | -0.075                     | 401.9846  |
| 49   | 22     | 28     | 48    | 22      | 27      | E    | 0           | 305350.804   | 0.050                      | 401.9717  |
| 19   | 17     | 3      | 18    | 16      | 2       | A    | 0           | 305464.903   | -0.029                     | 151.1535  |
| 19   | 17     | 2      | 18    | 16      | 3       | A    | 0           | 305464.903   | -0.029                     | 151.1535  |
| 46   | 12     | 34     | 45    | 12      | 33      | A    | 0           | 305562.884   | -0.031                     | 313.0108  |
| 48   | 15     | 34     | 47    | 15      | 33      | A    | 0           | 305571.233   | -0.088                     | 344.9292  |
| 66   | 3      | 63     | 66    | 2       | 64      | E    | 1           | 305720.073   | -0.598                     | 600.4226  |
| 66   | 4      | 63     | 66    | 3       | 64      | E    | 1           | 305720.073   | -0.598                     | 600.4226  |
| 63   | 28     | 36     | 63    | 27      | 36      | E    | 0           | 305753.385   | -0.174                     | 622.2140  |
| 31   | 11     | 21     | 30    | 10      | 20      | A    | 0           | 305764.391   | -0.030                     | 183.0208  |
| 63   | 28     | 35     | 63    | 27      | 36      | A    | 0           | 305782.006   | 0.003                      | 622.2239  |
| 63   | 28     | 36     | 63    | 27      | 37      | A    | 0           | 305782.006   | 0.003                      | 622.2239  |
| 63   | 28     | 35     | 63    | 27      | 37      | E    | 0           | 305799.522   | -0.104                     | 622.2126  |
| 49   | 21     | 29     | 48    | 21      | 28      | A    | 0           | 305891.243   | -0.038                     | 393.9852  |
| 49   | 21     | 28     | 48    | 21      | 27      | A    | 0           | 305891.243   | -0.038                     | 393.9852  |
| 49   | 21     | 28     | 48    | 21      | 27      | E    | 0           | 305894.096   | 0.053                      | 393.9818  |
| 48   | 15     | 33     | 47    | 15      | 32      | A    | 0           | 306161.670   | 0.000                      | 344.9557  |
| 49   | 10     | 39     | 48    | 10      | 38      | A    | 0           | 306170.338   | -0.322                     | 336.9219  |
| 21   | 16     | 5      | 20    | 15      | 6       | A    | 0           | 306315.914   | -0.021                     | 153.2674  |
| 21   | 16     | 6      | 20    | 15      | 5       | A    | 0           | 306315.914   | -0.021                     | 153.2674  |
| 62   | 28     | 34     | 62    | 27      | 35      | A    | 0           | 306336.466   | -0.015                     | 609.1107  |
| 62   | 28     | 35     | 62    | 27      | 36      | A    | 0           | 306336.466   | -0.015                     | 609.1107  |
| 47   | 11     | 36     | 46    | 11      | 35      | E    | 0           | 306778.163   | -0.026                     | 320.4835  |
| 47   | 11     | 36     | 46    | 11      | 35      | A    | 0           | 306793.326   | -0.006                     | 320.4769  |
| 48   | 14     | 35     | 47    | 14      | 34      | A    | 0           | 307059.968   | -0.042                     | 340.0732  |
| 23   | 15     | 9      | 22    | 14      | 8       | A    | 0           | 307117.831   | -0.013                     | 156.6151  |
| 23   | 15     | 8      | 22    | 14      | 9       | A    | 0           | 307117.831   | -0.013                     | 156.6151  |
| 56   | 14     | 42     | 55    | 15      | 41      | E    | 0           | 307183.469   | -0.040                     | 432.8612  |
| 48   | 13     | 36     | 47    | 13      | 35      | A    | 0           | 307205.158   | 0.035                      | 335.6437  |
| 49   | 19     | 31     | 48    | 19      | 30      | A    | 0           | 307290.986   | 0.023                      | 379.2378  |
| 31   | 11     | 20     | 30    | 10      | 21      | A    | 0           | 307335.486   | -0.005                     | 182.9773  |
| 60   | 28     | 32     | 60    | 27      | 33      | A    | 0           | 307360.705   | -0.020                     | 583.5317  |
| 60   | 28     | 33     | 60    | 27      | 34      | A    | 0           | 307360.705   | -0.020                     | 583.5317  |
| 49   | 11     | 39     | 48    | 10      | 38      | E    | 0           | 307740.988   | 0.098                      | 336.9264  |
| 49   | 11     | 39     | 48    | 10      | 38      | A    | 0           | 307757.684   | -0.066                     | 336.9219  |
| 25   | 14     | 12     | 24    | 13      | 11      | A    | 0           | 307803.458   | -0.011                     | 161.2160  |
| 59   | 28     | 32     | 59    | 27      | 32      | E    | 0           | 307805.633   | -0.209                     | 571.0547  |
| 59   | 28     | 31     | 59    | 27      | 32      | A    | 0           | 307832.972   | -0.022                     | 571.0650  |
| 59   | 28     | 32     | 59    | 27      | 33      | A    | 0           | 307832.972   | -0.022                     | 571.0650  |
| 59   | 28     | 31     | 59    | 27      | 33      | E    | 0           | 307852.328   | -0.122                     | 571.0535  |
| 29   | 12     | 18     | 28    | 11      | 17      | A    | 0           | 308082.158   | -0.063                     | 174.3267  |
| 29   | 12     | 17     | 28    | 11      | 18      | A    | 0           | 308117.578   | 0.039                      | 174.3256  |
| 49   | 18     | 32     | 48    | 18      | 31      | A    | 0           | 308216.165   | -0.064                     | 372.5096  |
| 49   | 18     | 31     | 48    | 18      | 30      | A    | 0           | 308217.665   | -0.095                     | 372.5097  |
| 65   | 2      | 63     | 65    | 1       | 64      | E    | 0           | 308226.081   | 0.043                      | 450.1792  |
| 65   | 3      | 63     | 65    | 2       | 64      | E    | 0           | 308226.081   | 0.043                      | 450.1792  |
| 27   | 13     | 15     | 26    | 12      | 14      | A    | 0           | 308234.104   | 0.170                      | 167.1014  |
| 65   | 2      | 63     | 65    | 1       | 64      | A    | 0           | 308275.698   | 0.176                      | 450.1700  |
| 65   | 3      | 63     | 65    | 2       | 64      | A    | 0           | 308275.698   | 0.176                      | 450.1700  |
| 58   | 28     | 30     | 58    | 27      | 31      | A    | 0           | 308280.249   | -0.007                     | 558.8130  |
| 58   | 28     | 31     | 58    | 27      | 32      | A    | 0           | 308280.249   | -0.007                     | 558.8130  |
| 47   | 13     | 34     | 46    | 13      | 33      | A    | 0           | 308585.232   | -0.075                     | 326.1798  |
| 57   | 28     | 29     | 57    | 27      | 30      | A    | 0           | 308703.643   | 0.027                      | 546.7754  |
| 57   | 28     | 30     | 57    | 27      | 31      | A    | 0           | 308703.643   | 0.027                      | 546.7754  |
| 53   | 7      | 46     | 52    | 7       | 45      | A    | 1           | 309038.270   | -0.027                     | 488.9741  |
| 53   | 7      | 46     | 52    | 8       | 45      | A    | 1           | 309038.270   | 0.147                      | 488.9741  |
| 53   | 8      | 46     | 52    | 7       | 45      | A    | 1           | 309038.270   | -0.119                     | 488.9741  |



| $J'$ | $K'_a$ | $K'_c$ | $J''$ | $K''_a$ | $K''_c$ | Sym. | $v_{tCH_3}$ | $\nu_{Obs.}$ | $\nu_{Obs.} - \nu_{Calc.}$ | $E_{low}$ |
|------|--------|--------|-------|---------|---------|------|-------------|--------------|----------------------------|-----------|
| 53   | 8      | 46     | 52    | 8       | 45      | A    | 1           | 309038.270   | 0.056                      | 488.9741  |
| 50   | 11     | 39     | 49    | 12      | 38      | A    | 0           | 309052.208   | -0.021                     | 351.9099  |
| 54   | 6      | 48     | 53    | 6       | 47      | A    | 1           | 309065.652   | -0.067                     | 492.3800  |
| 54   | 6      | 48     | 53    | 7       | 47      | A    | 1           | 309065.652   | -0.062                     | 492.3800  |
| 54   | 7      | 48     | 53    | 6       | 47      | A    | 1           | 309065.652   | -0.069                     | 492.3800  |
| 54   | 7      | 48     | 53    | 7       | 47      | A    | 1           | 309065.652   | -0.065                     | 492.3800  |
| 56   | 28     | 28     | 56    | 27      | 29      | A    | 0           | 309104.110   | -0.013                     | 534.9516  |
| 56   | 28     | 29     | 56    | 27      | 30      | A    | 0           | 309104.110   | -0.013                     | 534.9516  |
| 52   | 8      | 44     | 51    | 9       | 43      | A    | 1           | 309135.369   | 0.017                      | 485.0743  |
| 52   | 9      | 44     | 51    | 8       | 43      | A    | 1           | 309142.903   | 0.048                      | 485.0741  |
| 55   | 5      | 50     | 54    | 5       | 49      | A    | 1           | 309169.920   | -0.059                     | 495.3209  |
| 55   | 5      | 50     | 54    | 6       | 49      | A    | 1           | 309169.920   | -0.059                     | 495.3209  |
| 55   | 6      | 50     | 54    | 5       | 49      | A    | 1           | 309169.920   | -0.059                     | 495.3209  |
| 55   | 6      | 50     | 54    | 6       | 49      | A    | 1           | 309169.920   | -0.059                     | 495.3209  |
| 53   | 7      | 46     | 52    | 7       | 45      | E    | 1           | 309192.444   | -0.064                     | 488.8438  |
| 53   | 7      | 46     | 52    | 8       | 45      | E    | 1           | 309192.444   | 0.149                      | 488.8438  |
| 53   | 8      | 46     | 52    | 7       | 45      | E    | 1           | 309192.444   | -0.177                     | 488.8438  |
| 53   | 8      | 46     | 52    | 8       | 45      | E    | 1           | 309192.444   | 0.036                      | 488.8438  |
| 54   | 6      | 48     | 53    | 6       | 47      | E    | 1           | 309202.201   | -0.016                     | 492.2357  |
| 54   | 6      | 48     | 53    | 7       | 47      | E    | 1           | 309202.201   | -0.010                     | 492.2357  |
| 54   | 7      | 48     | 53    | 6       | 47      | E    | 1           | 309202.201   | -0.019                     | 492.2357  |
| 54   | 7      | 48     | 53    | 7       | 47      | E    | 1           | 309202.201   | -0.013                     | 492.2357  |
| 53   | 7      | 46     | 52    | 7       | 45      | E    | 0           | 309250.244   | -0.057                     | 360.5435  |
| 53   | 8      | 46     | 52    | 8       | 45      | E    | 0           | 309250.244   | 0.035                      | 360.5435  |
| 53   | 7      | 46     | 52    | 7       | 45      | A    | 0           | 309255.023   | -0.051                     | 360.5394  |
| 53   | 7      | 46     | 52    | 8       | 45      | A    | 0           | 309255.023   | 0.146                      | 360.5394  |
| 53   | 8      | 46     | 52    | 7       | 45      | A    | 0           | 309255.023   | -0.155                     | 360.5394  |
| 53   | 8      | 46     | 52    | 8       | 45      | A    | 0           | 309255.023   | 0.042                      | 360.5394  |
| 54   | 6      | 48     | 53    | 6       | 47      | E    | 0           | 309262.950   | -0.025                     | 363.9358  |
| 54   | 7      | 48     | 53    | 7       | 47      | E    | 0           | 309262.950   | -0.023                     | 363.9358  |
| 54   | 6      | 48     | 53    | 6       | 47      | A    | 0           | 309267.180   | -0.015                     | 363.9312  |
| 54   | 6      | 48     | 53    | 7       | 47      | A    | 0           | 309267.180   | -0.010                     | 363.9312  |
| 54   | 7      | 48     | 53    | 6       | 47      | A    | 0           | 309267.180   | -0.018                     | 363.9312  |
| 54   | 7      | 48     | 53    | 7       | 47      | A    | 0           | 309267.180   | -0.012                     | 363.9312  |
| 55   | 5      | 50     | 54    | 5       | 49      | E    | 1           | 309289.822   | 0.052                      | 495.1570  |
| 55   | 5      | 50     | 54    | 6       | 49      | E    | 1           | 309289.822   | 0.052                      | 495.1570  |
| 55   | 6      | 50     | 54    | 5       | 49      | E    | 1           | 309289.822   | 0.052                      | 495.1570  |
| 55   | 6      | 50     | 54    | 6       | 49      | E    | 1           | 309289.822   | 0.052                      | 495.1570  |
| 52   | 8      | 44     | 51    | 9       | 43      | E    | 1           | 309309.795   | 0.004                      | 484.9521  |
| 52   | 9      | 44     | 51    | 9       | 43      | E    | 1           | 309313.035   | 0.059                      | 484.9521  |
| 52   | 8      | 44     | 51    | 8       | 43      | E    | 1           | 309315.602   | 0.017                      | 484.9519  |
| 52   | 9      | 44     | 51    | 8       | 43      | E    | 1           | 309318.742   | -0.028                     | 484.9519  |
| 56   | 4      | 52     | 55    | 4       | 51      | A    | 1           | 309321.944   | -0.112                     | 497.8173  |
| 56   | 4      | 52     | 55    | 5       | 51      | A    | 1           | 309321.944   | -0.112                     | 497.8173  |
| 56   | 5      | 52     | 55    | 4       | 51      | A    | 1           | 309321.944   | -0.112                     | 497.8173  |
| 56   | 5      | 52     | 55    | 5       | 51      | A    | 1           | 309321.944   | -0.112                     | 497.8173  |
| 55   | 5      | 50     | 54    | 5       | 49      | E    | 0           | 309352.743   | 0.015                      | 366.8590  |
| 55   | 6      | 50     | 54    | 6       | 49      | E    | 0           | 309352.743   | 0.015                      | 366.8590  |
| 55   | 5      | 50     | 54    | 5       | 49      | A    | 0           | 309356.431   | 0.007                      | 366.8538  |
| 55   | 5      | 50     | 54    | 6       | 49      | A    | 0           | 309356.431   | 0.007                      | 366.8538  |
| 55   | 6      | 50     | 54    | 5       | 49      | A    | 0           | 309356.431   | 0.007                      | 366.8538  |
| 55   | 6      | 50     | 54    | 6       | 49      | A    | 0           | 309356.431   | 0.007                      | 366.8538  |
| 49   | 17     | 33     | 48    | 17      | 32      | A    | 0           | 309364.759   | -0.056                     | 366.2317  |
| 52   | 8      | 44     | 51    | 9       | 43      | A    | 0           | 309368.604   | -0.024                     | 356.6493  |
| 52   | 8      | 44     | 51    | 8       | 43      | E    | 0           | 309368.604   | 0.019                      | 356.6530  |
| 52   | 9      | 44     | 51    | 9       | 43      | A    | 0           | 309371.548   | -0.037                     | 356.6493  |
| 52   | 8      | 44     | 51    | 8       | 43      | A    | 0           | 309374.056   | 0.035                      | 356.6492  |
| 52   | 9      | 44     | 51    | 8       | 43      | A    | 0           | 309377.001   | 0.024                      | 356.6492  |
| 49   | 17     | 32     | 48    | 17      | 31      | E    | 0           | 309377.001   | -0.091                     | 366.2352  |
| 49   | 17     | 32     | 48    | 17      | 31      | A    | 0           | 309380.996   | -0.030                     | 366.2322  |
| 51   | 9      | 42     | 50    | 10      | 41      | A    | 1           | 309391.856   | 0.117                      | 480.6374  |
| 56   | 4      | 52     | 55    | 4       | 51      | E    | 1           | 309424.675   | -0.054                     | 497.6280  |
| 56   | 4      | 52     | 55    | 5       | 51      | E    | 1           | 309424.675   | -0.054                     | 497.6280  |
| 56   | 5      | 52     | 55    | 4       | 51      | E    | 1           | 309424.675   | -0.054                     | 497.6280  |
| 56   | 5      | 52     | 55    | 5       | 51      | E    | 1           | 309424.675   | -0.054                     | 497.6280  |
| 55   | 28     | 27     | 55    | 27      | 28      | A    | 0           | 309482.768   | -0.012                     | 523.3415  |
| 55   | 28     | 28     | 55    | 27      | 29      | A    | 0           | 309482.768   | -0.012                     | 523.3415  |
| 56   | 4      | 52     | 55    | 4       | 51      | E    | 0           | 309489.694   | 0.008                      | 369.3336  |
| 56   | 5      | 52     | 55    | 5       | 51      | E    | 0           | 309489.694   | 0.008                      | 369.3336  |
| 56   | 4      | 52     | 55    | 4       | 51      | A    | 0           | 309492.859   | 0.011                      | 369.3276  |
| 56   | 4      | 52     | 55    | 5       | 51      | A    | 0           | 309492.859   | 0.011                      | 369.3276  |
| 56   | 5      | 52     | 55    | 4       | 51      | A    | 0           | 309492.859   | 0.011                      | 369.3276  |
| 56   | 5      | 52     | 55    | 5       | 51      | A    | 0           | 309492.859   | 0.011                      | 369.3276  |
| 57   | 3      | 54     | 56    | 3       | 53      | A    | 1           | 309504.477   | -0.065                     | 499.8846  |
| 57   | 3      | 54     | 56    | 4       | 53      | A    | 1           | 309504.477   | -0.065                     | 499.8846  |
| 57   | 4      | 54     | 56    | 3       | 53      | A    | 1           | 309504.477   | -0.065                     | 499.8846  |
| 57   | 4      | 54     | 56    | 4       | 53      | A    | 1           | 309504.477   | -0.065                     | 499.8846  |
| 51   | 10     | 42     | 50    | 9       | 41      | A    | 1           | 309549.432   | 0.134                      | 480.6340  |
| 51   | 9      | 42     | 50    | 10      | 41      | E    | 1           | 309582.878   | 0.069                      | 480.5169  |
| 57   | 3      | 54     | 56    | 3       | 53      | E    | 1           | 309588.604   | -0.001                     | 499.6637  |
| 57   | 3      | 54     | 56    | 4       | 53      | E    | 1           | 309588.604   | -0.001                     | 499.6637  |
| 57   | 4      | 54     | 56    | 3       | 53      | E    | 1           | 309588.604   | -0.001                     | 499.6637  |
| 57   | 4      | 54     | 56    | 4       | 53      | E    | 1           | 309588.604   | -0.001                     | 499.6637  |
| 51   | 9      | 42     | 50    | 10      | 41      | A    | 0           | 309639.248   | 0.006                      | 352.2178  |
| 51   | 10     | 42     | 50    | 10      | 41      | E    | 1           | 309650.096   | 0.055                      | 480.5169  |
| 57   | 3      | 54     | 56    | 3       | 53      | E    | 0           | 309655.770   | 0.005                      | 371.3745  |
| 57   | 4      | 54     | 56    | 4       | 53      | E    | 0           | 309655.770   | 0.005                      | 371.3745  |
| 57   | 3      | 54     | 56    | 3       | 53      | A    | 0           | 309658.356   | 0.008                      | 371.3675  |
| 57   | 3      | 54     | 56    | 4       | 53      | A    | 0           | 309658.356   | 0.008                      | 371.3675  |
| 57   | 4      | 54     | 56    | 3       | 53      | A    | 0           | 309658.356   | 0.008                      | 371.3675  |
| 57   | 4      | 54     | 56    | 4       | 53      | A    | 0           | 309658.356   | 0.008                      | 371.3675  |
| 70   | 5      | 65     | 70    | 4       | 66      | E    | 1           | 309685.742   | -0.309                     | 670.3825  |
| 70   | 6      | 65     | 70    | 5       | 66      | E    | 1           | 309685.742   | -0.309                     | 670.3825  |
| 51   | 9      | 42     | 50    | 9       | 41      | E    | 1           | 309699.393   | -0.045                     | 480.5130  |
| 51   | 10     | 42     | 50    | 10      | 41      | A    | 0           | 309702.184   | -0.045                     | 352.2178  |
| 58   | 2      | 56     | 57    | 2       | 55      | A    | 1           | 309706.518   | -0.046                     | 501.5346  |
| 58   | 2      | 56     | 57    | 3       | 55      | A    | 1           | 309706.518   | -0.046                     | 501.5346  |
| 58   | 3      | 56     | 57    | 2       | 55      | A    | 1           | 309706.518   | -0.046                     | 501.5346  |
| 58   | 3      | 56     | 57    | 3       | 55      | A    | 1           | 309706.518   | -0.046                     | 501.5346  |
| 51   | 9      | 42     | 50    | 9       | 41      | A    | 0           | 309748.744   | -0.059                     | 352.2141  |
| 58   | 2      | 56     | 57    | 2       | 55      | E    | 1           | 309769.598   | 0.038                      | 501.2751  |
| 58   | 3      | 56     | 57    | 3       | 55      | E    | 1           | 309769.598   | 0.038                      | 501.2751  |
| 51   | 10     | 42     | 50    | 9       | 41      | A    | 0           | 309811.781   | -0.009                     | 352.2141  |
| 58   | 2      | 56     | 57    | 2       | 55      | E    | 0           | 309839.473   | 0.003                      | 372.9929  |
| 58   | 3      | 56     | 57    | 3       | 55      | E    | 0           | 309839.473   | 0.003                      | 372.9929  |
| 58   | 2      | 56     | 57    | 2       | 55      | A    | 0           | 309841.432   | 0.029                      | 372.9848  |
| 58   | 2      | 56     | 57    | 3       | 55      | A    | 0           | 309841.432   | 0.029                      | 372.9848  |
| 58   | 3      | 56     | 57    | 2       | 55      | A    | 0           | 309841.432   | 0.029                      | 372.9848  |
| 58   | 3      | 56     | 57    | 3       | 55      | A    | 0           | 309841.432   | 0.029                      | 372.9848  |
| 59   | 1      | 58     | 58    | 1       | 57      | A    | 1           | 309921.234   | 0.026                      | 502.7765  |
| 59   | 1      | 58     | 58    | 2       | 57      | A    | 1           | 309921.234   | 0.026                      | 502.7765  |
| 59   | 2      | 58     | 58    | 1       | 57      | A    | 1           | 309921.234   | 0.026                      | 502.7765  |
| 59   | 2      | 58     | 58    | 2       | 57      | A    | 1           | 309921.234   | 0.026                      | 502.7765  |
| 59   | 1      | 58     | 58    | 1       | 57      | E    | 1           | 309959.682   | -0.027                     | 502.4709  |
| 59   | 2      | 58     | 58    | 2       | 57      | E    | 1           | 309959.682   | -0.027                     | 502.4709  |
| 59   | 1      | 58     | 58    | 1       | 57      | E    | 0           | 310033.229   | -0.020                     | 374.1978  |



| $J'$ | $K'_a$ | $K'_c$ | $J''$ | $K''_a$ | $K''_c$ | Sym. | $v_{tCH_3}$ | $\nu_{Obs.}$ | $\nu_{Obs.} - \nu_{Calc.}$ | $E_{low}$ |
|------|--------|--------|-------|---------|---------|------|-------------|--------------|----------------------------|-----------|
| 59   | 2      | 58     | 58    | 2       | 57      | E    | 0           | 310033.229   | -0.020                     | 374.1978  |
| 59   | 1      | 58     | 58    | 1       | 57      | A    | 0           | 310034.526   | 0.096                      | 374.1883  |
| 59   | 1      | 58     | 58    | 2       | 57      | A    | 0           | 310034.526   | 0.096                      | 374.1883  |
| 59   | 2      | 58     | 58    | 1       | 57      | A    | 0           | 310034.526   | 0.096                      | 374.1883  |
| 59   | 2      | 58     | 58    | 2       | 57      | A    | 0           | 310034.526   | 0.096                      | 374.1883  |
| 60   | 0      | 60     | 59    | 0       | 59      | A    | 1           | 310144.245   | 0.151                      | 503.6183  |
| 60   | 0      | 60     | 59    | 1       | 59      | A    | 1           | 310144.245   | 0.151                      | 503.6183  |
| 60   | 1      | 60     | 59    | 0       | 59      | A    | 1           | 310144.245   | 0.151                      | 503.6183  |
| 60   | 1      | 60     | 59    | 1       | 59      | A    | 1           | 310144.245   | 0.151                      | 503.6183  |
| 60   | 0      | 60     | 59    | 0       | 59      | E    | 1           | 310153.698   | 0.068                      | 503.2578  |
| 60   | 1      | 60     | 59    | 1       | 59      | E    | 1           | 310153.698   | 0.068                      | 503.2578  |
| 53   | 28     | 25     | 53    | 27      | 26      | A    | 0           | 310178.296   | -0.041                     | 500.7605  |
| 53   | 28     | 26     | 53    | 27      | 27      | A    | 0           | 310178.296   | -0.041                     | 500.7605  |
| 50   | 11     | 40     | 49    | 11      | 39      | E    | 1           | 310215.517   | 0.047                      | 475.4810  |
| 60   | 0      | 60     | 59    | 0       | 59      | A    | 0           | 310232.191   | -0.138                     | 374.9851  |
| 60   | 0      | 60     | 59    | 1       | 59      | A    | 0           | 310232.191   | -0.138                     | 374.9851  |
| 60   | 1      | 60     | 59    | 0       | 59      | A    | 0           | 310232.191   | -0.138                     | 374.9851  |
| 60   | 1      | 60     | 59    | 1       | 59      | A    | 0           | 310232.191   | -0.138                     | 374.9851  |
| 60   | 0      | 60     | 59    | 0       | 59      | E    | 0           | 310232.191   | 0.165                      | 374.9962  |
| 60   | 1      | 60     | 59    | 1       | 59      | E    | 0           | 310232.191   | 0.165                      | 374.9962  |
| 48   | 14     | 34     | 47    | 14      | 33      | A    | 0           | 310251.418   | -0.089                     | 340.2522  |
| 32   | 11     | 22     | 31    | 10      | 21      | A    | 0           | 310354.165   | -0.015                     | 189.6117  |
| 52   | 28     | 24     | 52    | 27      | 25      | A    | 0           | 310496.968   | -0.066                     | 489.7889  |
| 52   | 28     | 25     | 52    | 27      | 26      | A    | 0           | 310496.968   | -0.066                     | 489.7889  |
| 18   | 18     | 0      | 17    | 17      | 1       | A    | 0           | 310744.830   | -0.021                     | 153.7483  |
| 18   | 18     | 1      | 17    | 17      | 0       | A    | 0           | 310744.830   | -0.021                     | 153.7483  |
| 51   | 28     | 23     | 51    | 27      | 24      | A    | 0           | 310797.452   | -0.025                     | 479.0297  |
| 51   | 28     | 24     | 51    | 27      | 25      | A    | 0           | 310797.452   | -0.025                     | 479.0297  |
| 49   | 16     | 34     | 48    | 16      | 33      | A    | 0           | 310803.815   | -0.113                     | 360.4269  |
| 48   | 11     | 37     | 47    | 11      | 36      | E    | 0           | 310852.203   | -0.102                     | 330.7165  |
| 50   | 10     | 40     | 49    | 10      | 39      | E    | 1           | 310860.604   | -0.121                     | 475.4253  |
| 50   | 24     | 26     | 49    | 24      | 25      | A    | 0           | 310871.488   | -0.042                     | 429.3592  |
| 50   | 24     | 27     | 49    | 24      | 26      | A    | 0           | 310871.488   | -0.042                     | 429.3592  |
| 50   | 10     | 40     | 49    | 10      | 39      | A    | 0           | 310878.437   | -0.020                     | 347.1346  |
| 48   | 11     | 37     | 47    | 11      | 36      | E    | 1           | 310930.141   | 0.167                      | 458.9782  |
| 49   | 16     | 33     | 48    | 16      | 32      | A    | 0           | 310945.501   | -0.022                     | 360.4326  |
| 50   | 28     | 22     | 50    | 27      | 23      | A    | 0           | 311080.458   | -0.018                     | 468.4823  |
| 50   | 28     | 23     | 50    | 27      | 24      | A    | 0           | 311080.458   | -0.018                     | 468.4823  |
| 50   | 23     | 28     | 49    | 23      | 27      | A    | 0           | 311305.099   | -0.052                     | 420.5618  |
| 50   | 23     | 27     | 49    | 23      | 26      | A    | 0           | 311305.099   | -0.052                     | 420.5618  |
| 50   | 23     | 28     | 49    | 23      | 27      | E    | 0           | 311307.415   | 0.158                      | 420.5488  |
| 49   | 28     | 21     | 49    | 27      | 22      | A    | 0           | 311346.760   | -0.047                     | 458.1465  |
| 49   | 28     | 22     | 49    | 27      | 23      | A    | 0           | 311346.760   | -0.047                     | 458.1465  |
| 69   | 4      | 65     | 69    | 3       | 66      | A    | 1           | 311454.096   | -0.028                     | 647.4242  |
| 69   | 5      | 65     | 69    | 4       | 66      | A    | 1           | 311454.096   | -0.028                     | 647.4242  |
| 48   | 28     | 20     | 48    | 27      | 21      | A    | 0           | 311597.136   | -0.082                     | 448.0221  |
| 48   | 28     | 21     | 48    | 27      | 22      | A    | 0           | 311597.136   | -0.082                     | 448.0221  |
| 20   | 17     | 4      | 19    | 16      | 3       | A    | 0           | 311609.057   | -0.023                     | 155.0564  |
| 20   | 17     | 3      | 19    | 16      | 4       | A    | 0           | 311609.057   | -0.023                     | 155.0564  |
| 50   | 22     | 28     | 49    | 22      | 27      | A    | 0           | 311804.518   | -0.039                     | 412.1699  |
| 50   | 22     | 29     | 49    | 22      | 28      | A    | 0           | 311804.518   | -0.039                     | 412.1699  |
| 47   | 28     | 19     | 47    | 27      | 20      | A    | 0           | 311832.386   | -0.043                     | 438.1086  |
| 47   | 28     | 20     | 47    | 27      | 21      | A    | 0           | 311832.386   | -0.043                     | 438.1086  |
| 50   | 11     | 40     | 49    | 10      | 39      | A    | 0           | 311850.017   | -0.021                     | 347.1346  |
| 46   | 28     | 18     | 46    | 27      | 19      | A    | 0           | 312053.090   | -0.040                     | 428.4059  |
| 46   | 28     | 19     | 46    | 27      | 20      | A    | 0           | 312053.090   | -0.040                     | 428.4059  |
| 45   | 28     | 17     | 45    | 27      | 18      | A    | 0           | 312259.940   | -0.050                     | 418.9137  |
| 45   | 28     | 18     | 45    | 27      | 19      | A    | 0           | 312259.940   | -0.050                     | 418.9137  |
| 50   | 21     | 30     | 49    | 21      | 29      | A    | 0           | 312385.647   | -0.051                     | 404.1886  |
| 50   | 21     | 29     | 49    | 21      | 28      | A    | 0           | 312385.647   | -0.052                     | 404.1886  |
| 50   | 21     | 29     | 49    | 21      | 28      | E    | 0           | 312388.678   | 0.040                      | 404.1854  |
| 22   | 16     | 6      | 21    | 15      | 6       | E    | 0           | 312404.753   | -0.049                     | 157.5942  |
| 22   | 16     | 7      | 21    | 15      | 7       | E    | 0           | 312414.780   | 0.017                      | 157.5806  |
| 44   | 28     | 17     | 44    | 27      | 17      | E    | 0           | 312429.605   | -0.024                     | 409.6203  |
| 22   | 16     | 6      | 21    | 15      | 7       | A    | 0           | 312449.985   | -0.021                     | 157.5892  |
| 22   | 16     | 7      | 21    | 15      | 6       | A    | 0           | 312449.985   | -0.021                     | 157.5892  |
| 44   | 28     | 16     | 44    | 27      | 17      | A    | 0           | 312453.546   | -0.105                     | 409.6316  |
| 44   | 28     | 17     | 44    | 27      | 18      | A    | 0           | 312453.546   | -0.105                     | 409.6316  |
| 44   | 28     | 16     | 44    | 27      | 18      | E    | 0           | 312477.253   | 0.090                      | 409.6196  |
| 49   | 15     | 35     | 48    | 15      | 34      | A    | 0           | 312480.306   | -0.016                     | 355.1220  |
| 49   | 15     | 35     | 48    | 15      | 34      | E    | 0           | 312495.929   | 0.006                      | 355.1218  |
| 43   | 28     | 16     | 43    | 27      | 16      | E    | 0           | 312610.784   | -0.060                     | 400.5481  |
| 43   | 28     | 15     | 43    | 27      | 17      | E    | 0           | 312658.359   | -0.039                     | 400.5475  |
| 69   | 4      | 65     | 69    | 3       | 66      | A    | 0           | 312673.565   | 0.011                      | 518.9771  |
| 69   | 5      | 65     | 69    | 4       | 66      | A    | 0           | 312673.565   | 0.011                      | 518.9771  |
| 42   | 28     | 15     | 42    | 27      | 15      | E    | 0           | 312780.064   | -0.010                     | 391.6856  |
| 42   | 28     | 14     | 42    | 27      | 15      | A    | 0           | 312803.775   | -0.064                     | 391.6971  |
| 42   | 28     | 15     | 42    | 27      | 16      | A    | 0           | 312803.775   | -0.064                     | 391.6971  |
| 41   | 28     | 14     | 41    | 27      | 14      | E    | 0           | 312937.854   | -0.042                     | 383.0326  |
| 41   | 28     | 13     | 41    | 27      | 14      | A    | 0           | 312961.307   | -0.238                     | 383.0441  |
| 41   | 28     | 14     | 41    | 27      | 15      | A    | 0           | 312961.307   | -0.238                     | 383.0441  |
| 41   | 28     | 13     | 41    | 27      | 15      | E    | 0           | 312985.499   | 0.019                      | 383.0320  |
| 50   | 20     | 31     | 49    | 20      | 30      | A    | 0           | 313070.387   | -0.040                     | 396.6249  |
| 40   | 28     | 13     | 40    | 27      | 13      | E    | 0           | 313084.867   | -0.002                     | 374.5888  |
| 40   | 28     | 12     | 40    | 27      | 13      | A    | 0           | 313108.379   | -0.029                     | 374.6003  |
| 40   | 28     | 13     | 40    | 27      | 14      | A    | 0           | 313108.379   | -0.029                     | 374.6003  |
| 24   | 15     | 9      | 23    | 14      | 9       | E    | 0           | 313184.974   | -0.064                     | 161.3671  |
| 24   | 15     | 10     | 23    | 14      | 10      | E    | 0           | 313189.312   | -0.009                     | 161.3534  |
| 32   | 11     | 21     | 31    | 10      | 22      | A    | 0           | 313199.605   | 0.042                      | 189.5338  |
| 39   | 28     | 12     | 39    | 27      | 12      | E    | 0           | 313221.542   | 0.008                      | 366.3539  |
| 24   | 15     | 10     | 23    | 14      | 9       | A    | 0           | 313228.176   | -0.008                     | 161.3606  |
| 24   | 15     | 9      | 23    | 14      | 10      | A    | 0           | 313228.176   | -0.008                     | 161.3606  |
| 32   | 11     | 21     | 31    | 10      | 22      | E    | 0           | 313230.666   | -0.062                     | 189.5391  |
| 39   | 28     | 11     | 39    | 27      | 12      | A    | 0           | 313244.941   | -0.028                     | 366.3654  |
| 39   | 28     | 12     | 39    | 27      | 13      | A    | 0           | 313244.941   | -0.028                     | 366.3654  |
| 39   | 28     | 11     | 39    | 27      | 13      | E    | 0           | 313269.280   | 0.144                      | 366.3534  |
| 38   | 28     | 11     | 38    | 27      | 11      | E    | 0           | 313348.379   | -0.033                     | 358.3278  |
| 49   | 13     | 37     | 48    | 13      | 36      | A    | 0           | 313358.152   | 0.129                      | 345.8910  |
| 49   | 13     | 37     | 48    | 13      | 36      | E    | 0           | 313358.152   | -0.146                     | 345.8944  |
| 38   | 28     | 10     | 38    | 27      | 11      | A    | 0           | 313371.677   | -0.072                     | 358.3393  |
| 38   | 28     | 11     | 38    | 27      | 12      | A    | 0           | 313371.677   | -0.072                     | 358.3393  |
| 38   | 28     | 10     | 38    | 27      | 12      | E    | 0           | 313396.031   | 0.012                      | 358.3272  |
| 49   | 15     | 34     | 48    | 15      | 33      | A    | 0           | 313453.868   | -0.169                     | 355.1681  |
| 49   | 15     | 34     | 48    | 15      | 33      | E    | 0           | 313453.868   | 0.156                      | 355.1695  |
| 37   | 28     | 10     | 37    | 27      | 10      | E    | 0           | 313465.898   | -0.109                     | 350.5102  |
| 37   | 28     | 9      | 37    | 27      | 10      | A    | 0           | 313489.201   | -0.054                     | 350.5217  |
| 37   | 28     | 10     | 37    | 27      | 11      | A    | 0           | 313489.201   | -0.054                     | 350.5217  |
| 37   | 28     | 9      | 37    | 27      | 11      | E    | 0           | 313513.650   | 0.032                      | 350.5096  |
| 36   | 28     | 9      | 36    | 27      | 9       | E    | 0           | 313574.811   | 0.003                      | 342.9009  |
| 36   | 28     | 8      | 36    | 27      | 9       | A    | 0           | 313597.901   | -0.070                     | 342.9124  |
| 36   | 28     | 9      | 36    | 27      | 10      | A    | 0           | 313597.901   | -0.070                     | 342.9124  |
| 36   | 28     | 8      | 36    | 27      | 10      | E    | 0           | 313622.418   | -0.001                     | 342.9003  |
| 35   | 28     | 8      | 35    | 27      | 8       | E    | 0           | 313675.236   | -0.049                     | 335.4996  |
| 35   | 28     | 7      | 35    | 27      | 8       | A    | 0           | 313698.344   | -0.025                     | 335.5112  |
| 35   | 28     | 8      | 35    | 27      | 9       | A    | 0           | 313698.344   | -0.025                     | 335.5112  |
| 35   | 28     | 7      | 35    | 27      | 9       | E    | 0           | 313722.881   | -0.014                     | 335.4991  |



| $J'$ | $K'_a$ | $K'_c$ | $J''$ | $K''_a$ | $K''_c$ | Sym. | $v_{tCH_3}$ | $\nu_{Obs.}$ | $\nu_{Obs.} - \nu_{Calc.}$ | $E_{low}$ |
|------|--------|--------|-------|---------|---------|------|-------------|--------------|----------------------------|-----------|
| 34   | 28     | 6      | 34    | 27      | 7       | A    | 0           | 313790.918   | 0.014                      | 328.3179  |
| 34   | 28     | 7      | 34    | 27      | 8       | A    | 0           | 313790.918   | 0.014                      | 328.3179  |
| 49   | 14     | 36     | 48    | 14      | 35      | A    | 0           | 313793.567   | -0.095                     | 350.3156  |
| 49   | 14     | 36     | 48    | 14      | 35      | E    | 0           | 313799.358   | -0.067                     | 350.3176  |
| 30   | 12     | 19     | 29    | 11      | 19      | E    | 0           | 313811.069   | 0.003                      | 180.4010  |
| 34   | 28     | 6      | 34    | 27      | 8       | E    | 0           | 313815.550   | 0.049                      | 328.3058  |
| 30   | 12     | 19     | 29    | 11      | 18      | A    | 0           | 313819.294   | -0.022                     | 180.4043  |
| 30   | 12     | 18     | 29    | 11      | 18      | E    | 0           | 313821.424   | -0.068                     | 180.4136  |
| 26   | 14     | 13     | 25    | 13      | 13      | E    | 0           | 313822.735   | 0.043                      | 166.3864  |
| 26   | 14     | 12     | 25    | 13      | 12      | E    | 0           | 313824.332   | -0.070                     | 166.3999  |
| 70   | 29     | 42     | 70    | 28      | 42      | E    | 0           | 313828.221   | -0.012                     | 730.1295  |
| 33   | 28     | 6      | 33    | 27      | 6       | E    | 0           | 313853.015   | -0.060                     | 321.3207  |
| 70   | 29     | 42     | 70    | 28      | 43      | A    | 0           | 313854.280   | 0.039                      | 730.1393  |
| 70   | 29     | 41     | 70    | 28      | 42      | A    | 0           | 313854.280   | 0.039                      | 730.1393  |
| 26   | 14     | 13     | 25    | 13      | 12      | A    | 0           | 313864.816   | -0.017                     | 166.3921  |
| 70   | 29     | 41     | 70    | 28      | 43      | E    | 0           | 313873.486   | -0.116                     | 730.1291  |
| 33   | 28     | 5      | 33    | 27      | 6       | A    | 0           | 313875.967   | -0.049                     | 321.3323  |
| 33   | 28     | 6      | 33    | 27      | 7       | A    | 0           | 313875.967   | -0.049                     | 321.3323  |
| 50   | 19     | 32     | 49    | 19      | 31      | A    | 0           | 313889.875   | 0.080                      | 389.4880  |
| 50   | 19     | 31     | 49    | 19      | 30      | E    | 0           | 313893.210   | -0.080                     | 389.4880  |
| 30   | 12     | 18     | 29    | 11      | 19      | A    | 0           | 313894.864   | -0.082                     | 180.4021  |
| 33   | 28     | 5      | 33    | 27      | 7       | E    | 0           | 313900.575   | -0.103                     | 321.3202  |
| 32   | 28     | 5      | 32    | 27      | 5       | E    | 0           | 313931.365   | 0.111                      | 314.5426  |
| 32   | 28     | 4      | 32    | 27      | 5       | A    | 0           | 313954.118   | -0.012                     | 314.5542  |
| 32   | 28     | 5      | 32    | 27      | 6       | A    | 0           | 313954.118   | -0.012                     | 314.5542  |
| 32   | 28     | 4      | 32    | 27      | 6       | E    | 0           | 313978.936   | 0.087                      | 314.5421  |
| 31   | 28     | 4      | 31    | 27      | 4       | E    | 0           | 314002.865   | 0.025                      | 307.9718  |
| 31   | 28     | 3      | 31    | 27      | 4       | A    | 0           | 314025.563   | -0.092                     | 307.9834  |
| 31   | 28     | 4      | 31    | 27      | 5       | A    | 0           | 314025.563   | -0.092                     | 307.9834  |
| 31   | 28     | 3      | 31    | 27      | 5       | E    | 0           | 314050.512   | 0.086                      | 307.9713  |
| 54   | 7      | 47     | 53    | 7       | 46      | A    | 1           | 314140.613   | -0.018                     | 499.2825  |
| 54   | 7      | 47     | 53    | 8       | 46      | A    | 1           | 314140.613   | 0.073                      | 499.2825  |
| 54   | 8      | 47     | 53    | 7       | 46      | A    | 1           | 314140.613   | -0.066                     | 499.2825  |
| 54   | 8      | 47     | 53    | 8       | 46      | A    | 1           | 314140.613   | 0.025                      | 499.2825  |
| 28   | 13     | 16     | 27    | 12      | 16      | E    | 0           | 314152.194   | -0.005                     | 172.7149  |
| 28   | 13     | 15     | 27    | 12      | 15      | E    | 0           | 314160.372   | -0.056                     | 172.7281  |
| 55   | 6      | 49     | 54    | 6       | 48      | A    | 1           | 314178.772   | -0.073                     | 502.6893  |
| 55   | 6      | 49     | 54    | 7       | 48      | A    | 1           | 314178.772   | -0.071                     | 502.6893  |
| 55   | 7      | 49     | 54    | 6       | 48      | A    | 1           | 314178.772   | -0.074                     | 502.6893  |
| 55   | 7      | 49     | 54    | 7       | 48      | A    | 1           | 314178.772   | -0.072                     | 502.6893  |
| 28   | 13     | 16     | 27    | 12      | 15      | A    | 0           | 314197.451   | 0.438                      | 172.7189  |
| 28   | 13     | 15     | 27    | 12      | 16      | A    | 0           | 314197.451   | -0.478                     | 172.7189  |
| 53   | 8      | 45     | 52    | 9       | 44      | A    | 1           | 314218.404   | 0.103                      | 495.3860  |
| 53   | 9      | 45     | 52    | 9       | 44      | A    | 1           | 314219.763   | 0.023                      | 495.3860  |
| 53   | 8      | 45     | 52    | 8       | 44      | A    | 1           | 314221.070   | 0.118                      | 495.3859  |
| 53   | 9      | 45     | 52    | 8       | 44      | A    | 1           | 314222.437   | 0.046                      | 495.3859  |
| 33   | 11     | 23     | 32    | 10      | 22      | E    | 0           | 314239.288   | -0.050                     | 196.4541  |
| 56   | 5      | 51     | 55    | 5       | 50      | A    | 1           | 314288.656   | -0.083                     | 505.6337  |
| 56   | 5      | 51     | 55    | 6       | 50      | A    | 1           | 314288.656   | -0.083                     | 505.6337  |
| 56   | 6      | 51     | 55    | 5       | 50      | A    | 1           | 314288.656   | -0.084                     | 505.6337  |
| 56   | 6      | 51     | 55    | 6       | 50      | A    | 1           | 314288.656   | -0.083                     | 505.6337  |
| 54   | 7      | 47     | 53    | 7       | 46      | E    | 1           | 314292.589   | -0.032                     | 499.1573  |
| 54   | 7      | 47     | 53    | 8       | 46      | E    | 1           | 314292.589   | 0.081                      | 499.1573  |
| 54   | 8      | 47     | 53    | 7       | 46      | E    | 1           | 314292.589   | -0.092                     | 499.1573  |
| 54   | 8      | 47     | 53    | 8       | 46      | E    | 1           | 314292.589   | 0.021                      | 499.1573  |
| 55   | 6      | 49     | 54    | 6       | 48      | E    | 1           | 314313.826   | -0.019                     | 502.5495  |
| 55   | 6      | 49     | 54    | 7       | 48      | E    | 1           | 314313.826   | -0.016                     | 502.5495  |
| 55   | 7      | 49     | 54    | 6       | 48      | E    | 1           | 314313.826   | -0.021                     | 502.5495  |
| 55   | 7      | 49     | 54    | 7       | 48      | E    | 1           | 314313.826   | -0.018                     | 502.5495  |
| 33   | 11     | 23     | 32    | 10      | 22      | A    | 0           | 314326.577   | -0.026                     | 196.4477  |
| 54   | 7      | 47     | 53    | 7       | 46      | E    | 0           | 314352.887   | -0.023                     | 370.8590  |
| 54   | 8      | 47     | 53    | 8       | 46      | E    | 0           | 314352.887   | 0.026                      | 370.8590  |
| 54   | 7      | 47     | 53    | 7       | 46      | A    | 0           | 314357.593   | -0.022                     | 370.8550  |
| 54   | 7      | 47     | 53    | 8       | 46      | A    | 0           | 314357.593   | 0.082                      | 370.8550  |
| 54   | 8      | 47     | 53    | 7       | 46      | A    | 0           | 314357.593   | -0.077                     | 370.8550  |
| 54   | 8      | 47     | 53    | 8       | 46      | A    | 0           | 314357.593   | 0.027                      | 370.8550  |
| 55   | 6      | 49     | 54    | 6       | 48      | E    | 0           | 314376.779   | -0.007                     | 374.2517  |
| 55   | 7      | 49     | 54    | 7       | 48      | E    | 0           | 314376.779   | -0.005                     | 374.2517  |
| 55   | 6      | 49     | 54    | 6       | 48      | A    | 0           | 314380.948   | -0.011                     | 374.2472  |
| 55   | 6      | 49     | 54    | 7       | 48      | A    | 0           | 314380.948   | -0.008                     | 374.2472  |
| 55   | 7      | 49     | 54    | 6       | 48      | A    | 0           | 314380.948   | -0.012                     | 374.2472  |
| 55   | 7      | 49     | 54    | 7       | 48      | A    | 0           | 314380.948   | -0.010                     | 374.2472  |
| 53   | 8      | 45     | 52    | 9       | 44      | E    | 1           | 314389.682   | 0.005                      | 495.2696  |
| 53   | 9      | 45     | 52    | 9       | 44      | E    | 1           | 314391.435   | 0.017                      | 495.2696  |
| 53   | 8      | 45     | 52    | 8       | 44      | E    | 1           | 314392.921   | 0.059                      | 495.2695  |
| 53   | 9      | 45     | 52    | 8       | 44      | E    | 1           | 314394.888   | 0.286                      | 495.2695  |
| 56   | 5      | 51     | 55    | 5       | 50      | E    | 1           | 314407.519   | -0.013                     | 505.4738  |
| 56   | 5      | 51     | 55    | 6       | 50      | E    | 1           | 314407.519   | -0.013                     | 505.4738  |
| 56   | 6      | 51     | 55    | 5       | 50      | E    | 1           | 314407.519   | -0.013                     | 505.4738  |
| 56   | 6      | 51     | 55    | 6       | 50      | E    | 1           | 314407.519   | -0.013                     | 505.4738  |
| 57   | 4      | 53     | 56    | 4       | 52      | A    | 1           | 314443.632   | -0.115                     | 508.1352  |
| 57   | 4      | 53     | 56    | 5       | 52      | A    | 1           | 314443.632   | -0.115                     | 508.1352  |
| 57   | 5      | 53     | 56    | 4       | 52      | A    | 1           | 314443.632   | -0.115                     | 508.1352  |
| 57   | 5      | 53     | 56    | 5       | 52      | A    | 1           | 314443.632   | -0.115                     | 508.1352  |
| 53   | 9      | 45     | 52    | 9       | 44      | A    | 0           | 314452.838   | -0.046                     | 366.9689  |
| 53   | 8      | 45     | 52    | 8       | 44      | A    | 0           | 314454.270   | 0.040                      | 366.9688  |
| 53   | 9      | 45     | 52    | 8       | 44      | A    | 0           | 314455.830   | -0.011                     | 366.9688  |
| 52   | 9      | 43     | 51    | 10      | 42      | A    | 1           | 314462.355   | 0.103                      | 490.9595  |
| 56   | 5      | 51     | 55    | 5       | 50      | E    | 0           | 314472.447   | 0.000                      | 377.1779  |
| 56   | 6      | 51     | 55    | 6       | 50      | E    | 0           | 314472.447   | 0.000                      | 377.1779  |
| 56   | 5      | 51     | 55    | 5       | 50      | A    | 0           | 314476.122   | 0.010                      | 377.1729  |
| 56   | 5      | 51     | 55    | 6       | 50      | A    | 0           | 314476.122   | 0.010                      | 377.1729  |
| 56   | 6      | 51     | 55    | 5       | 50      | A    | 0           | 314476.122   | 0.010                      | 377.1729  |
| 56   | 6      | 51     | 55    | 6       | 50      | A    | 0           | 314476.122   | 0.010                      | 377.1729  |
| 52   | 9      | 43     | 51    | 9       | 42      | A    | 1           | 314519.799   | 0.152                      | 490.9576  |
| 57   | 4      | 53     | 56    | 4       | 52      | E    | 1           | 314545.882   | 0.096                      | 507.9493  |
| 57   | 4      | 53     | 56    | 5       | 52      | E    | 1           | 314545.882   | 0.096                      | 507.9493  |
| 57   | 5      | 53     | 56    | 4       | 52      | E    | 1           | 314545.882   | 0.096                      | 507.9493  |
| 57   | 5      | 53     | 56    | 5       | 52      | E    | 1           | 314545.882   | 0.096                      | 507.9493  |
| 52   | 10     | 43     | 51    | 9       | 42      | A    | 1           | 314552.392   | 0.139                      | 490.9576  |
| 57   | 4      | 53     | 56    | 4       | 52      | E    | 0           | 314612.530   | 0.006                      | 379.6571  |
| 57   | 5      | 53     | 56    | 5       | 52      | E    | 0           | 314612.530   | 0.006                      | 379.6571  |
| 57   | 4      | 53     | 56    | 4       | 52      | A    | 0           | 314615.676   | 0.010                      | 379.6512  |
| 57   | 4      | 53     | 56    | 5       | 52      | A    | 0           | 314615.676   | 0.010                      | 379.6512  |
| 57   | 5      | 53     | 56    | 4       | 52      | A    | 0           | 314615.676   | 0.010                      | 379.6512  |
| 57   | 5      | 53     | 56    | 5       | 52      | A    | 0           | 314615.676   | 0.010                      | 379.6512  |
| 58   | 3      | 55     | 57    | 3       | 54      | A    | 1           | 314627.633   | -0.083                     | 510.2086  |
| 58   | 3      | 55     | 57    | 4       | 54      | A    | 1           | 314627.633   | -0.083                     | 510.2086  |
| 58   | 4      | 55     | 57    | 3       | 54      | A    | 1           | 314627.633   | -0.083                     | 510.2086  |
| 58   | 4      | 55     | 57    | 4       | 54      | A    | 1           | 314627.633   | -0.083                     | 510.2086  |
| 52   | 9      | 43     | 51    | 10      | 42      | E    | 1           | 314653.025   | 0.097                      | 490.8457  |
| 52   | 10     | 43     | 51    | 10      | 42      | E    | 1           | 314691.334   | -0.016                     | 490.8457  |
| 33   | 10     | 23     | 32    | 9       | 24      | E    | 0           | 314702.798   | -0.005                     | 193.0466  |
| 52   | 9      | 43     | 51    | 10      | 42      | E    | 0           | 314705.061   | -0.003                     | 362.5519  |
| 52   | 9      | 43     | 51    | 9       | 42      | E    | 1           | 314720.135   | -0.024                     | 490.8435  |
| 52   | 10     | 43     | 51    | 10      | 42      | E    | 0           | 314740.761   | -0.009                     | 362.5519  |



| $J'$ | $K'_a$ | $K'_c$ | $J''$ | $K''_a$ | $K''_c$ | Sym. | $v_{tCH_3}$ | $\nu_{Obs.}$ | $\nu_{Obs.} - \nu_{Calc.}$ | $E_{low}$ |
|------|--------|--------|-------|---------|---------|------|-------------|--------------|----------------------------|-----------|
| 52   | 10     | 43     | 51    | 10      | 42      | A    | 0           | 314746.816   | -0.043                     | 362.5483  |
| 52   | 10     | 43     | 51    | 9       | 42      | E    | 1           | 314758.614   | 0.033                      | 490.8435  |
| 52   | 9      | 43     | 51    | 9       | 42      | E    | 0           | 314767.683   | -0.037                     | 362.5498  |
| 52   | 9      | 43     | 51    | 9       | 42      | A    | 0           | 314773.973   | 0.029                      | 362.5462  |
| 58   | 3      | 55     | 57    | 3       | 54      | E    | 0           | 314780.216   | 0.006                      | 381.7035  |
| 58   | 4      | 55     | 57    | 4       | 54      | E    | 0           | 314780.216   | 0.006                      | 381.7035  |
| 58   | 3      | 55     | 57    | 3       | 54      | A    | 0           | 314782.796   | 0.014                      | 381.6966  |
| 58   | 3      | 55     | 57    | 4       | 54      | A    | 0           | 314782.796   | 0.014                      | 381.6966  |
| 58   | 4      | 55     | 57    | 3       | 54      | A    | 0           | 314782.796   | 0.014                      | 381.6966  |
| 58   | 4      | 55     | 57    | 4       | 54      | A    | 0           | 314782.796   | 0.014                      | 381.6966  |
| 52   | 10     | 43     | 51    | 9       | 42      | E    | 0           | 314803.368   | -0.058                     | 362.5498  |
| 52   | 10     | 43     | 51    | 9       | 42      | A    | 0           | 314809.841   | -0.004                     | 362.5462  |
| 49   | 11     | 38     | 48    | 11      | 37      | E    | 0           | 314826.705   | -0.016                     | 341.0854  |
| 59   | 2      | 57     | 58    | 2       | 56      | A    | 1           | 314830.419   | -0.046                     | 511.8653  |
| 59   | 2      | 57     | 58    | 3       | 56      | A    | 1           | 314830.419   | -0.046                     | 511.8653  |
| 59   | 3      | 57     | 58    | 2       | 56      | A    | 1           | 314830.419   | -0.046                     | 511.8653  |
| 59   | 3      | 57     | 58    | 3       | 56      | A    | 1           | 314830.419   | -0.046                     | 511.8653  |
| 49   | 11     | 38     | 48    | 11      | 37      | A    | 0           | 314842.851   | -0.090                     | 341.0799  |
| 50   | 18     | 33     | 49    | 18      | 32      | A    | 0           | 314889.460   | 0.014                      | 382.7906  |
| 59   | 2      | 57     | 58    | 2       | 56      | E    | 1           | 314893.318   | 0.039                      | 511.6079  |
| 59   | 2      | 57     | 58    | 3       | 56      | E    | 1           | 314893.318   | 0.039                      | 511.6079  |
| 59   | 3      | 57     | 58    | 2       | 56      | E    | 1           | 314893.318   | 0.039                      | 511.6079  |
| 59   | 3      | 57     | 58    | 3       | 56      | E    | 1           | 314893.318   | 0.039                      | 511.6079  |
| 50   | 18     | 33     | 49    | 18      | 32      | E    | 0           | 314896.447   | -0.056                     | 382.7808  |
| 59   | 2      | 57     | 58    | 2       | 56      | E    | 0           | 314964.730   | 0.024                      | 383.3281  |
| 59   | 3      | 57     | 58    | 3       | 56      | E    | 0           | 314964.730   | 0.024                      | 383.3281  |
| 59   | 2      | 57     | 58    | 2       | 56      | A    | 0           | 314966.648   | 0.015                      | 383.3200  |
| 59   | 2      | 57     | 58    | 3       | 56      | A    | 0           | 314966.648   | 0.015                      | 383.3200  |
| 59   | 3      | 57     | 58    | 2       | 56      | A    | 0           | 314966.648   | 0.015                      | 383.3200  |
| 59   | 3      | 57     | 58    | 3       | 56      | A    | 0           | 314966.648   | 0.015                      | 383.3200  |
| 51   | 11     | 41     | 50    | 11      | 40      | A    | 1           | 315028.710   | 0.191                      | 485.9465  |
| 60   | 1      | 59     | 59    | 1       | 58      | A    | 1           | 315045.493   | 0.012                      | 513.1144  |
| 60   | 1      | 59     | 59    | 2       | 58      | A    | 1           | 315045.493   | 0.012                      | 513.1144  |
| 60   | 2      | 59     | 59    | 1       | 58      | A    | 1           | 315045.493   | 0.012                      | 513.1144  |
| 60   | 2      | 59     | 59    | 2       | 58      | A    | 1           | 315045.493   | 0.012                      | 513.1144  |
| 60   | 2      | 59     | 59    | 2       | 58      | E    | 1           | 315083.878   | -0.019                     | 512.8101  |
| 60   | 1      | 59     | 59    | 1       | 58      | E    | 0           | 315158.792   | -0.066                     | 384.5394  |
| 60   | 2      | 59     | 59    | 2       | 58      | E    | 0           | 315158.792   | -0.066                     | 384.5394  |
| 60   | 1      | 59     | 59    | 1       | 58      | A    | 0           | 315160.068   | 0.031                      | 384.5300  |
| 60   | 1      | 59     | 59    | 2       | 58      | A    | 0           | 315160.068   | 0.031                      | 384.5300  |
| 60   | 2      | 59     | 59    | 1       | 58      | A    | 0           | 315160.068   | 0.031                      | 384.5300  |
| 60   | 2      | 59     | 59    | 2       | 58      | A    | 0           | 315160.068   | 0.031                      | 384.5300  |
| 61   | 0      | 61     | 60    | 0       | 60      | A    | 1           | 315268.781   | 0.161                      | 513.9636  |
| 61   | 0      | 61     | 60    | 1       | 60      | A    | 1           | 315268.781   | 0.161                      | 513.9636  |
| 61   | 1      | 61     | 60    | 0       | 60      | A    | 1           | 315268.781   | 0.161                      | 513.9636  |
| 61   | 1      | 61     | 60    | 1       | 60      | A    | 1           | 315268.781   | 0.161                      | 513.9636  |
| 61   | 0      | 61     | 60    | 0       | 60      | E    | 1           | 315278.128   | 0.057                      | 513.6034  |
| 61   | 1      | 61     | 60    | 1       | 60      | E    | 1           | 315278.128   | 0.057                      | 513.6034  |
| 51   | 11     | 41     | 50    | 11      | 40      | A    | 0           | 315298.218   | -0.009                     | 357.5368  |
| 61   | 0      | 61     | 60    | 0       | 60      | A    | 0           | 315357.986   | -0.135                     | 385.3333  |
| 61   | 0      | 61     | 60    | 1       | 60      | A    | 0           | 315357.986   | -0.135                     | 385.3333  |
| 61   | 1      | 61     | 60    | 0       | 60      | A    | 0           | 315357.986   | -0.135                     | 385.3333  |
| 61   | 1      | 61     | 60    | 1       | 60      | A    | 0           | 315357.986   | -0.135                     | 385.3333  |
| 61   | 0      | 61     | 60    | 0       | 60      | E    | 0           | 315357.986   | 0.165                      | 385.3445  |
| 61   | 1      | 61     | 60    | 1       | 60      | E    | 0           | 315357.986   | 0.165                      | 385.3445  |
| 51   | 30     | 21     | 50    | 30      | 20      | A    | 0           | 315435.559   | 0.036                      | 500.7877  |
| 51   | 30     | 22     | 50    | 30      | 21      | A    | 0           | 315435.559   | 0.036                      | 500.7877  |
| 51   | 30     | 21     | 50    | 30      | 20      | E    | 0           | 315435.559   | -0.168                     | 500.7786  |
| 51   | 30     | 22     | 50    | 30      | 21      | E    | 0           | 315436.987   | 0.170                      | 500.7747  |
| 68   | 3      | 65     | 68    | 2       | 66      | A    | 0           | 315481.950   | 0.032                      | 496.0738  |
| 68   | 4      | 65     | 68    | 3       | 66      | A    | 0           | 315481.950   | 0.032                      | 496.0738  |
| 54   | 13     | 41     | 53    | 14      | 40      | E    | 0           | 315528.050   | -0.063                     | 404.8129  |
| 50   | 12     | 39     | 49    | 12      | 38      | E    | 0           | 315562.917   | -0.010                     | 351.9137  |
| 50   | 12     | 39     | 49    | 12      | 38      | A    | 0           | 315568.283   | -0.030                     | 351.9099  |
| 51   | 29     | 23     | 50    | 29      | 22      | A    | 0           | 315665.197   | 0.095                      | 489.6278  |
| 51   | 29     | 22     | 50    | 29      | 21      | A    | 0           | 315665.197   | 0.095                      | 489.6278  |
| 51   | 29     | 22     | 50    | 29      | 21      | E    | 0           | 315665.197   | -0.295                     | 489.6176  |
| 51   | 29     | 23     | 50    | 29      | 22      | E    | 0           | 315666.563   | -0.014                     | 489.6153  |
| 51   | 10     | 41     | 50    | 10      | 40      | E    | 0           | 315674.506   | 0.001                      | 357.5083  |
| 51   | 10     | 41     | 50    | 10      | 40      | A    | 0           | 315682.877   | 0.020                      | 357.5044  |
| 52   | 12     | 40     | 51    | 13      | 39      | A    | 0           | 315825.911   | -0.039                     | 377.8392  |
| 67   | 29     | 39     | 67    | 28      | 39      | E    | 0           | 315838.584   | -0.112                     | 686.9496  |
| 67   | 29     | 39     | 67    | 28      | 40      | A    | 0           | 315863.361   | -0.050                     | 686.9599  |
| 67   | 29     | 38     | 67    | 28      | 39      | A    | 0           | 315863.361   | -0.050                     | 686.9599  |
| 50   | 17     | 34     | 49    | 17      | 33      | A    | 0           | 316134.376   | -0.046                     | 376.5510  |
| 50   | 17     | 34     | 49    | 17      | 33      | E    | 0           | 316154.304   | -0.076                     | 376.5430  |
| 50   | 17     | 33     | 49    | 17      | 32      | E    | 0           | 316155.546   | 0.063                      | 376.5549  |
| 50   | 17     | 33     | 49    | 17      | 32      | A    | 0           | 316164.662   | -0.042                     | 376.5521  |
| 51   | 11     | 41     | 50    | 10      | 40      | E    | 0           | 316258.737   | -0.012                     | 357.5083  |
| 51   | 11     | 41     | 50    | 10      | 40      | A    | 0           | 316269.712   | -0.096                     | 357.5044  |
| 66   | 29     | 38     | 66    | 28      | 38      | E    | 0           | 316444.304   | -0.045                     | 672.9909  |
| 66   | 29     | 38     | 66    | 28      | 39      | A    | 0           | 316468.678   | 0.011                      | 673.0014  |
| 66   | 29     | 37     | 66    | 28      | 38      | A    | 0           | 316468.678   | 0.011                      | 673.0014  |
| 66   | 29     | 37     | 66    | 28      | 39      | E    | 0           | 316490.233   | -0.106                     | 672.9908  |
| 51   | 26     | 25     | 50    | 26      | 24      | A    | 0           | 316519.023   | -0.088                     | 458.5001  |
| 51   | 26     | 26     | 50    | 26      | 25      | A    | 0           | 316519.023   | -0.088                     | 458.5001  |
| 51   | 11     | 40     | 50    | 12      | 39      | A    | 0           | 316568.443   | -0.051                     | 362.4361  |
| 51   | 11     | 40     | 50    | 12      | 39      | E    | 0           | 316578.809   | -0.104                     | 362.4398  |
| 19   | 18     | 1      | 18    | 17      | 1       | E    | 0           | 316843.776   | -0.068                     | 157.4439  |
| 19   | 18     | 2      | 18    | 17      | 2       | E    | 0           | 316864.379   | 0.037                      | 157.4312  |
| 51   | 25     | 27     | 50    | 25      | 26      | A    | 0           | 316875.887   | 0.027                      | 448.9147  |
| 51   | 25     | 26     | 50    | 25      | 25      | A    | 0           | 316875.887   | 0.027                      | 448.9147  |
| 19   | 18     | 1      | 18    | 17      | 2       | A    | 0           | 316891.190   | -0.018                     | 157.4420  |
| 19   | 18     | 2      | 18    | 17      | 1       | A    | 0           | 316891.190   | -0.018                     | 157.4420  |
| 48   | 13     | 35     | 47    | 13      | 34      | A    | 0           | 316913.307   | -0.026                     | 336.4731  |
| 48   | 13     | 35     | 47    | 13      | 34      | E    | 0           | 316926.654   | -0.023                     | 336.4783  |
| 65   | 29     | 37     | 65    | 28      | 37      | E    | 0           | 317019.964   | -0.156                     | 659.2489  |
| 65   | 29     | 37     | 65    | 28      | 38      | A    | 0           | 317044.060   | 0.002                      | 659.2594  |
| 65   | 29     | 36     | 65    | 28      | 37      | A    | 0           | 317044.060   | 0.002                      | 659.2594  |
| 51   | 24     | 27     | 50    | 24      | 26      | A    | 0           | 317280.391   | -0.031                     | 439.7287  |
| 51   | 24     | 28     | 50    | 24      | 27      | A    | 0           | 317280.391   | -0.031                     | 439.7287  |
| 38   | 11     | 28     | 37    | 10      | 27      | E    | 0           | 317292.437   | -0.090                     | 234.5613  |
| 34   | 11     | 24     | 33    | 10      | 23      | E    | 0           | 317369.093   | -0.207                     | 203.5440  |
| 38   | 11     | 28     | 37    | 10      | 27      | A    | 0           | 317374.862   | 0.006                      | 234.5535  |
| 34   | 11     | 24     | 33    | 10      | 23      | A    | 0           | 317444.210   | 0.016                      | 203.5374  |
| 64   | 29     | 36     | 64    | 28      | 37      | E    | 0           | 317567.250   | -0.068                     | 645.7230  |
| 70   | 4      | 66     | 70    | 3       | 67      | E    | 0           | 317574.410   | -0.042                     | 531.5337  |
| 70   | 5      | 66     | 70    | 4       | 67      | E    | 0           | 317574.410   | -0.042                     | 531.5337  |
| 64   | 29     | 36     | 64    | 28      | 37      | A    | 0           | 317590.885   | -0.006                     | 645.7337  |
| 64   | 29     | 35     | 64    | 28      | 36      | A    | 0           | 317590.885   | -0.006                     | 645.7337  |
| 50   | 16     | 35     | 49    | 16      | 34      | A    | 0           | 317682.022   | -0.043                     | 370.7942  |
| 21   | 17     | 4      | 20    | 16      | 4       | E    | 0           | 317704.338   | -0.050                     | 159.1702  |
| 50   | 16     | 35     | 49    | 16      | 34      | E    | 0           | 317718.355   | 0.003                      | 370.7906  |
| 21   | 17     | 5      | 20    | 16      | 5       | E    | 0           | 317719.752   | 0.026                      | 159.1570  |
| 21   | 17     | 5      | 20    | 16      | 4       | A    | 0           | 317750.960   | -0.027                     | 159.1668  |
| 21   | 17     | 4      | 20    | 16      | 5       | A    | 0           | 317750.960   | -0.027                     | 159.1668  |



| $J'$ | $K'_a$ | $K'_c$ | $J''$ | $K''_a$ | $K''_c$ | Sym. | $v_{tCH_3}$ | $\nu_{Obs.}$ | $\nu_{Obs.} - \nu_{Calc.}$ | $E_{low}$ |
|------|--------|--------|-------|---------|---------|------|-------------|--------------|----------------------------|-----------|
| 50   | 16     | 34     | 49    | 16      | 33      | E    | 0           | 317906.157   | 0.017                      | 370.8064  |
| 50   | 16     | 34     | 49    | 16      | 33      | A    | 0           | 317929.350   | -0.040                     | 370.8046  |
| 63   | 29     | 35     | 63    | 28      | 36      | E    | 0           | 318087.101   | -0.082                     | 632.4129  |
| 63   | 29     | 35     | 63    | 28      | 36      | A    | 0           | 318110.386   | -0.020                     | 632.4237  |
| 63   | 29     | 34     | 63    | 28      | 35      | A    | 0           | 318110.386   | -0.020                     | 632.4237  |
| 51   | 22     | 29     | 50    | 22      | 28      | A    | 0           | 318276.065   | -0.050                     | 422.5706  |
| 51   | 22     | 30     | 50    | 22      | 29      | A    | 0           | 318276.065   | -0.049                     | 422.5706  |
| 51   | 22     | 29     | 50    | 22      | 28      | E    | 0           | 318278.965   | -0.054                     | 422.5658  |
| 49   | 14     | 35     | 48    | 14      | 34      | A    | 0           | 318441.451   | -0.043                     | 350.6011  |
| 49   | 14     | 35     | 48    | 14      | 34      | E    | 0           | 318455.580   | -0.025                     | 350.6042  |
| 23   | 16     | 7      | 22    | 15      | 7       | E    | 0           | 318533.601   | -0.059                     | 162.1248  |
| 23   | 16     | 8      | 22    | 15      | 8       | E    | 0           | 318543.562   | 0.008                      | 162.1112  |
| 48   | 12     | 36     | 47    | 12      | 35      | E    | 0           | 318567.553   | 0.005                      | 333.6314  |
| 48   | 12     | 36     | 47    | 12      | 35      | A    | 0           | 318571.776   | -0.061                     | 333.6246  |
| 23   | 16     | 7      | 22    | 15      | 8       | A    | 0           | 318578.817   | -0.024                     | 162.1198  |
| 23   | 16     | 8      | 22    | 15      | 7       | A    | 0           | 318578.817   | -0.024                     | 162.1198  |
| 62   | 29     | 34     | 62    | 28      | 35      | A    | 0           | 318603.784   | 0.003                      | 619.3290  |
| 62   | 29     | 33     | 62    | 28      | 34      | A    | 0           | 318603.784   | 0.003                      | 619.3290  |
| 62   | 29     | 33     | 62    | 28      | 34      | E    | 0           | 318627.210   | -0.125                     | 619.3183  |
| 50   | 11     | 39     | 49    | 11      | 38      | E    | 0           | 318869.713   | 0.007                      | 351.5869  |
| 51   | 21     | 31     | 50    | 21      | 30      | A    | 0           | 318897.751   | -0.091                     | 414.6087  |
| 51   | 21     | 30     | 50    | 21      | 29      | A    | 0           | 318897.751   | -0.093                     | 414.6087  |
| 51   | 21     | 31     | 50    | 21      | 30      | E    | 0           | 318901.081   | -0.105                     | 414.5964  |
| 61   | 29     | 33     | 61    | 28      | 34      | E    | 0           | 319049.436   | -0.133                     | 606.4383  |
| 61   | 29     | 33     | 61    | 28      | 34      | A    | 0           | 319072.128   | -0.009                     | 606.4493  |
| 61   | 29     | 32     | 61    | 28      | 33      | A    | 0           | 319072.128   | -0.009                     | 606.4493  |
| 61   | 29     | 32     | 61    | 28      | 33      | E    | 0           | 319096.031   | -0.071                     | 606.4385  |
| 55   | 7      | 48     | 54    | 7       | 47      | A    | 1           | 319244.470   | -0.049                     | 509.7611  |
| 55   | 7      | 48     | 54    | 8       | 47      | A    | 1           | 319244.470   | -0.002                     | 509.7611  |
| 55   | 8      | 48     | 54    | 7       | 47      | A    | 1           | 319244.470   | -0.074                     | 509.7611  |
| 55   | 8      | 48     | 54    | 8       | 47      | A    | 1           | 319244.470   | -0.027                     | 509.7611  |
| 25   | 15     | 10     | 24    | 14      | 10      | E    | 0           | 319285.143   | -0.054                     | 166.3229  |
| 25   | 15     | 11     | 24    | 14      | 11      | E    | 0           | 319289.392   | 0.028                      | 166.3093  |
| 56   | 6      | 50     | 55    | 6       | 49      | A    | 1           | 319292.496   | -0.072                     | 513.1692  |
| 56   | 6      | 50     | 55    | 7       | 49      | A    | 1           | 319292.496   | -0.071                     | 513.1692  |
| 56   | 7      | 50     | 55    | 6       | 49      | A    | 1           | 319292.496   | -0.072                     | 513.1692  |
| 56   | 7      | 50     | 55    | 7       | 49      | A    | 1           | 319292.496   | -0.071                     | 513.1692  |
| 33   | 11     | 22     | 32    | 10      | 23      | A    | 0           | 319300.322   | 0.034                      | 196.3134  |
| 33   | 11     | 22     | 32    | 10      | 23      | E    | 0           | 319302.917   | -0.056                     | 196.3190  |
| 54   | 8      | 46     | 53    | 9       | 45      | A    | 1           | 319304.194   | -0.002                     | 505.8672  |
| 54   | 9      | 46     | 53    | 8       | 45      | A    | 1           | 319306.456   | 0.044                      | 505.8672  |
| 50   | 13     | 38     | 49    | 13      | 37      | E    | 0           | 319322.006   | -0.093                     | 356.3469  |
| 50   | 13     | 38     | 49    | 13      | 37      | A    | 0           | 319323.229   | 0.058                      | 356.3435  |
| 25   | 15     | 11     | 24    | 14      | 10      | A    | 0           | 319328.291   | -0.015                     | 166.3165  |
| 25   | 15     | 10     | 24    | 14      | 11      | A    | 0           | 319328.291   | -0.015                     | 166.3165  |
| 37   | 11     | 27     | 36    | 10      | 26      | E    | 0           | 319331.989   | -0.065                     | 226.4073  |
| 35   | 11     | 25     | 34    | 10      | 24      | E    | 0           | 319378.220   | -0.415                     | 210.8962  |
| 50   | 15     | 36     | 49    | 15      | 35      | A    | 0           | 319387.184   | -0.036                     | 365.5452  |
| 55   | 7      | 48     | 54    | 7       | 47      | E    | 1           | 319394.362   | -0.002                     | 509.6410  |
| 55   | 7      | 48     | 54    | 8       | 47      | E    | 1           | 319394.362   | 0.057                      | 509.6410  |
| 55   | 8      | 48     | 54    | 7       | 47      | E    | 1           | 319394.362   | -0.033                     | 509.6410  |
| 55   | 8      | 48     | 54    | 8       | 47      | E    | 1           | 319394.362   | 0.026                      | 509.6410  |
| 50   | 15     | 36     | 49    | 15      | 35      | E    | 0           | 319398.675   | -0.021                     | 365.5455  |
| 57   | 5      | 52     | 56    | 5       | 51      | A    | 1           | 319407.568   | -0.091                     | 516.1172  |
| 57   | 5      | 52     | 56    | 6       | 51      | A    | 1           | 319407.568   | -0.091                     | 516.1172  |
| 57   | 6      | 52     | 56    | 5       | 51      | A    | 1           | 319407.568   | -0.091                     | 516.1172  |
| 57   | 6      | 52     | 56    | 6       | 51      | A    | 1           | 319407.568   | -0.091                     | 516.1172  |
| 56   | 6      | 50     | 55    | 6       | 49      | E    | 1           | 319426.085   | -0.020                     | 513.0339  |
| 56   | 6      | 50     | 55    | 7       | 49      | E    | 1           | 319426.085   | -0.019                     | 513.0339  |
| 56   | 7      | 50     | 55    | 6       | 49      | E    | 1           | 319426.085   | -0.021                     | 513.0339  |
| 56   | 7      | 50     | 55    | 7       | 49      | E    | 1           | 319426.085   | -0.019                     | 513.0339  |
| 35   | 11     | 25     | 34    | 10      | 24      | A    | 0           | 319450.451   | 0.024                      | 210.8893  |
| 55   | 7      | 48     | 54    | 7       | 47      | E    | 0           | 319457.103   | -0.021                     | 381.3447  |
| 55   | 8      | 48     | 54    | 8       | 47      | E    | 0           | 319457.103   | 0.005                      | 381.3447  |
| 55   | 7      | 48     | 54    | 7       | 47      | A    | 0           | 319461.752   | -0.012                     | 381.3409  |
| 55   | 7      | 48     | 54    | 8       | 47      | A    | 0           | 319461.752   | 0.043                      | 381.3409  |
| 55   | 8      | 48     | 54    | 7       | 47      | A    | 0           | 319461.752   | -0.041                     | 381.3409  |
| 55   | 8      | 48     | 54    | 8       | 47      | A    | 0           | 319461.752   | 0.014                      | 381.3409  |
| 31   | 12     | 20     | 30    | 11      | 19      | A    | 0           | 319464.908   | -0.031                     | 186.7043  |
| 54   | 8      | 46     | 53    | 9       | 45      | E    | 1           | 319472.479   | -0.063                     | 505.7566  |
| 54   | 9      | 46     | 53    | 8       | 45      | E    | 1           | 319475.294   | 0.066                      | 505.7565  |
| 56   | 6      | 50     | 55    | 6       | 49      | E    | 0           | 319491.217   | -0.003                     | 384.7381  |
| 56   | 7      | 50     | 55    | 7       | 49      | E    | 0           | 319491.217   | -0.002                     | 384.7381  |
| 56   | 6      | 50     | 55    | 6       | 49      | A    | 0           | 319495.352   | 0.004                      | 384.7339  |
| 56   | 6      | 50     | 55    | 7       | 49      | A    | 0           | 319495.352   | 0.005                      | 384.7339  |
| 56   | 7      | 50     | 55    | 6       | 49      | A    | 0           | 319495.352   | 0.003                      | 384.7339  |
| 56   | 7      | 50     | 55    | 7       | 49      | A    | 0           | 319495.352   | 0.004                      | 384.7339  |
| 31   | 12     | 19     | 30    | 11      | 19      | E    | 0           | 319498.942   | -0.033                     | 186.7128  |
| 31   | 12     | 20     | 30    | 11      | 20      | E    | 0           | 319505.098   | -0.012                     | 186.6997  |
| 60   | 29     | 32     | 60    | 28      | 33      | A    | 0           | 319516.514   | -0.025                     | 593.7842  |
| 60   | 29     | 31     | 60    | 28      | 32      | A    | 0           | 319516.514   | -0.025                     | 593.7842  |
| 57   | 5      | 52     | 56    | 5       | 51      | E    | 1           | 319525.471   | 0.001                      | 515.9613  |
| 57   | 5      | 52     | 56    | 6       | 51      | E    | 1           | 319525.471   | 0.001                      | 515.9613  |
| 57   | 6      | 52     | 56    | 5       | 51      | E    | 1           | 319525.471   | 0.001                      | 515.9613  |
| 57   | 6      | 52     | 56    | 6       | 51      | E    | 1           | 319525.471   | 0.001                      | 515.9613  |
| 53   | 9      | 44     | 52    | 10      | 43      | A    | 1           | 319527.974   | 0.099                      | 501.4499  |
| 54   | 8      | 46     | 53    | 9       | 45      | A    | 0           | 319536.837   | -0.059                     | 377.4579  |
| 54   | 9      | 46     | 53    | 8       | 45      | A    | 0           | 319539.445   | 0.064                      | 377.4578  |
| 53   | 10     | 44     | 52    | 10      | 43      | A    | 1           | 319546.365   | 0.114                      | 501.4499  |
| 53   | 9      | 44     | 52    | 9       | 43      | A    | 1           | 319560.577   | 0.096                      | 501.4488  |
| 58   | 4      | 54     | 57    | 4       | 53      | A    | 1           | 319565.288   | -0.106                     | 518.6239  |
| 58   | 4      | 54     | 57    | 5       | 53      | A    | 1           | 319565.288   | -0.106                     | 518.6239  |
| 58   | 5      | 54     | 57    | 4       | 53      | A    | 1           | 319565.288   | -0.106                     | 518.6239  |
| 58   | 5      | 54     | 57    | 5       | 53      | A    | 1           | 319565.288   | -0.106                     | 518.6239  |
| 57   | 5      | 52     | 56    | 5       | 51      | E    | 0           | 319592.342   | 0.001                      | 387.6676  |
| 57   | 6      | 52     | 56    | 6       | 51      | E    | 0           | 319592.342   | 0.001                      | 387.6676  |
| 57   | 5      | 52     | 56    | 5       | 51      | A    | 0           | 319596.000   | 0.023                      | 387.6627  |
| 57   | 5      | 52     | 56    | 6       | 51      | A    | 0           | 319596.000   | 0.023                      | 387.6627  |
| 57   | 6      | 52     | 56    | 5       | 51      | A    | 0           | 319596.000   | 0.023                      | 387.6627  |
| 57   | 6      | 52     | 56    | 6       | 51      | A    | 0           | 319596.000   | 0.023                      | 387.6627  |
| 31   | 12     | 19     | 30    | 11      | 20      | A    | 0           | 319621.339   | -0.029                     | 186.6998  |
| 51   | 20     | 31     | 50    | 20      | 30      | A    | 0           | 319632.241   | 0.009                      | 407.0678  |
| 58   | 4      | 54     | 57    | 4       | 53      | E    | 1           | 319666.960   | 0.150                      | 518.4414  |
| 58   | 4      | 54     | 57    | 5       | 53      | E    | 1           | 319666.960   | 0.150                      | 518.4414  |
| 58   | 5      | 54     | 57    | 4       | 53      | E    | 1           | 319666.960   | 0.150                      | 518.4414  |
| 58   | 5      | 54     | 57    | 5       | 53      | E    | 1           | 319666.960   | 0.150                      | 518.4414  |
| 53   | 9      | 44     | 52    | 10      | 43      | E    | 1           | 319716.510   | -0.014                     | 501.3427  |
| 58   | 4      | 54     | 57    | 4       | 53      | E    | 0           | 319735.339   | 0.009                      | 390.1514  |
| 58   | 5      | 54     | 57    | 5       | 53      | E    | 0           | 319735.339   | 0.009                      | 390.1514  |
| 58   | 4      | 54     | 57    | 4       | 53      | A    | 0           | 319738.459   | 0.007                      | 390.1457  |
| 58   | 4      | 54     | 57    | 5       | 53      | A    | 0           | 319738.459   | 0.007                      | 390.1457  |
| 58   | 5      | 54     | 57    | 4       | 53      | A    | 0           | 319738.459   | 0.007                      | 390.1457  |
| 58   | 5      | 54     | 57    | 5       | 53      | A    | 0           | 319738.459   | 0.007                      | 390.1457  |
| 59   | 3      | 56     | 58    | 3       | 55      | A    | 1           | 319750.659   | -0.096                     | 520.7035  |
| 59   | 3      | 56     | 58    | 4       | 55      | A    | 1           | 319750.659   | -0.096                     | 520.7035  |
| 59   | 4      | 56     | 58    | 3       | 55      | A    | 1           | 319750.659   | -0.096                     | 520.7035  |



| $J'$ | $K'_a$ | $K'_c$ | $J''$ | $K''_a$ | $K''_c$ | Sym. | $v_{tCH_3}$ | $\nu_{Obs.}$ | $\nu_{Obs.} - \nu_{Calc.}$ | $E_{low}$ |
|------|--------|--------|-------|---------|---------|------|-------------|--------------|----------------------------|-----------|
| 59   | 4      | 56     | 58    | 4       | 55      | A    | 1           | 319750.659   | -0.096                     | 520.7035  |
| 53   | 9      | 44     | 52    | 9       | 43      | E    | 1           | 319755.001   | 0.054                      | 501.3414  |
| 53   | 9      | 44     | 52    | 10      | 43      | E    | 0           | 319771.002   | -0.006                     | 373.0506  |
| 53   | 9      | 44     | 52    | 10      | 43      | A    | 0           | 319776.804   | -0.045                     | 373.0472  |
| 53   | 10     | 44     | 52    | 10      | 43      | E    | 0           | 319791.251   | 0.057                      | 373.0506  |
| 53   | 10     | 44     | 52    | 10      | 43      | A    | 0           | 319797.133   | -0.016                     | 373.0472  |
| 53   | 9      | 44     | 52    | 9       | 43      | E    | 0           | 319806.692   | -0.022                     | 373.0494  |
| 53   | 9      | 44     | 52    | 9       | 43      | A    | 0           | 319812.690   | -0.061                     | 373.0460  |
| 53   | 10     | 44     | 52    | 9       | 43      | E    | 0           | 319826.880   | -0.020                     | 373.0494  |
| 53   | 10     | 44     | 52    | 9       | 43      | A    | 0           | 319832.912   | -0.139                     | 373.0460  |
| 59   | 3      | 56     | 58    | 3       | 55      | E    | 1           | 319834.077   | -0.017                     | 520.4881  |
| 59   | 3      | 56     | 58    | 4       | 55      | E    | 1           | 319834.077   | -0.017                     | 520.4881  |
| 59   | 4      | 56     | 58    | 3       | 55      | E    | 1           | 319834.077   | -0.017                     | 520.4881  |
| 59   | 4      | 56     | 58    | 4       | 55      | E    | 1           | 319834.077   | -0.017                     | 520.4881  |
| 27   | 14     | 14     | 26    | 13      | 14      | E    | 0           | 319865.149   | 0.010                      | 171.7752  |
| 27   | 14     | 13     | 26    | 13      | 13      | E    | 0           | 319867.006   | -0.052                     | 171.7887  |
| 59   | 3      | 56     | 58    | 3       | 55      | E    | 0           | 319904.558   | 0.030                      | 392.2034  |
| 59   | 4      | 56     | 58    | 4       | 55      | E    | 0           | 319904.558   | 0.030                      | 392.2034  |
| 59   | 3      | 56     | 58    | 3       | 55      | A    | 0           | 319907.197   | 0.108                      | 392.1966  |
| 59   | 3      | 56     | 58    | 4       | 55      | A    | 0           | 319907.197   | 0.108                      | 392.1966  |
| 59   | 4      | 56     | 58    | 3       | 55      | A    | 0           | 319907.197   | 0.108                      | 392.1966  |
| 59   | 4      | 56     | 58    | 4       | 55      | A    | 0           | 319907.197   | 0.108                      | 392.1966  |
| 59   | 29     | 31     | 59    | 28      | 32      | E    | 0           | 319915.908   | -0.130                     | 581.3220  |
| 59   | 29     | 31     | 59    | 28      | 32      | A    | 0           | 319938.013   | 0.007                      | 581.3332  |
| 59   | 29     | 30     | 59    | 28      | 31      | A    | 0           | 319938.013   | 0.007                      | 581.3332  |
| 60   | 2      | 58     | 59    | 2       | 57      | A    | 1           | 319954.142   | -0.056                     | 522.3669  |
| 60   | 2      | 58     | 59    | 3       | 57      | A    | 1           | 319954.142   | -0.056                     | 522.3669  |
| 60   | 3      | 58     | 59    | 2       | 57      | A    | 1           | 319954.142   | -0.056                     | 522.3669  |
| 60   | 3      | 58     | 59    | 3       | 57      | A    | 1           | 319954.142   | -0.056                     | 522.3669  |
| 59   | 29     | 30     | 59    | 28      | 31      | E    | 0           | 319962.635   | -0.095                     | 581.3224  |
| 52   | 10     | 42     | 51    | 11      | 41      | E    | 0           | 319966.010   | 0.028                      | 368.0575  |
| 52   | 10     | 42     | 51    | 11      | 41      | A    | 0           | 319971.003   | -0.016                     | 368.0540  |
| 60   | 2      | 58     | 59    | 2       | 57      | E    | 1           | 320016.924   | 0.091                      | 522.1116  |
| 60   | 2      | 58     | 59    | 3       | 57      | E    | 1           | 320016.924   | 0.091                      | 522.1116  |
| 60   | 3      | 58     | 59    | 2       | 57      | E    | 1           | 320016.924   | 0.091                      | 522.1116  |
| 60   | 3      | 58     | 59    | 3       | 57      | E    | 1           | 320016.924   | 0.091                      | 522.1116  |
| 52   | 11     | 42     | 51    | 11      | 41      | A    | 1           | 320051.607   | 0.114                      | 496.4547  |
| 36   | 11     | 26     | 35    | 10      | 25      | E    | 0           | 320060.092   | -0.086                     | 218.5169  |
| 29   | 13     | 17     | 28    | 12      | 17      | E    | 0           | 320080.496   | -0.008                     | 178.5486  |
| 60   | 2      | 58     | 59    | 3       | 57      | E    | 0           | 320089.786   | 0.008                      | 393.8341  |
| 60   | 3      | 58     | 59    | 2       | 57      | E    | 0           | 320089.786   | 0.008                      | 393.8341  |
| 60   | 2      | 58     | 59    | 2       | 57      | A    | 0           | 320091.709   | 0.010                      | 393.8262  |
| 60   | 2      | 58     | 59    | 3       | 57      | A    | 0           | 320091.709   | 0.010                      | 393.8262  |
| 60   | 3      | 58     | 59    | 2       | 57      | A    | 0           | 320091.709   | 0.010                      | 393.8262  |
| 60   | 3      | 58     | 59    | 3       | 57      | A    | 0           | 320091.709   | 0.010                      | 393.8262  |
| 29   | 13     | 17     | 28    | 12      | 16      | A    | 0           | 320124.562   | -0.395                     | 178.5525  |
| 29   | 13     | 16     | 28    | 12      | 17      | A    | 0           | 320127.189   | -0.006                     | 178.5525  |
| 36   | 11     | 26     | 35    | 10      | 25      | A    | 0           | 320134.027   | -0.006                     | 218.5097  |
| 61   | 1      | 60     | 60    | 1       | 59      | A    | 1           | 320169.583   | 0.008                      | 523.6232  |
| 61   | 1      | 60     | 60    | 2       | 59      | A    | 1           | 320169.583   | 0.008                      | 523.6232  |
| 61   | 2      | 60     | 60    | 2       | 59      | A    | 1           | 320169.583   | 0.008                      | 523.6232  |
| 61   | 1      | 60     | 60    | 1       | 59      | E    | 1           | 320207.941   | 0.033                      | 523.3201  |
| 61   | 2      | 60     | 60    | 2       | 59      | E    | 1           | 320207.941   | 0.033                      | 523.3201  |
| 61   | 1      | 60     | 60    | 1       | 59      | E    | 0           | 320284.266   | -0.025                     | 395.0520  |
| 61   | 2      | 60     | 60    | 2       | 59      | E    | 0           | 320284.266   | -0.025                     | 395.0520  |
| 61   | 1      | 60     | 60    | 1       | 59      | A    | 0           | 320285.519   | 0.051                      | 395.0426  |
| 61   | 1      | 60     | 60    | 2       | 59      | A    | 0           | 320285.519   | 0.051                      | 395.0426  |
| 61   | 2      | 60     | 60    | 1       | 59      | A    | 0           | 320285.519   | 0.051                      | 395.0426  |
| 61   | 2      | 60     | 60    | 2       | 59      | A    | 0           | 320285.519   | 0.051                      | 395.0426  |
| 52   | 11     | 42     | 51    | 11      | 41      | E    | 0           | 320314.650   | -0.055                     | 368.0575  |
| 58   | 29     | 30     | 58    | 28      | 31      | E    | 0           | 320315.949   | 0.127                      | 569.0848  |
| 58   | 29     | 29     | 58    | 28      | 30      | A    | 0           | 320337.501   | -0.010                     | 569.0962  |
| 58   | 29     | 29     | 58    | 28      | 30      | E    | 0           | 320362.476   | -0.108                     | 569.0853  |
| 62   | 0      | 62     | 61    | 0       | 61      | A    | 1           | 320393.138   | 0.170                      | 524.4798  |
| 62   | 0      | 62     | 61    | 1       | 61      | A    | 1           | 320393.138   | 0.170                      | 524.4798  |
| 62   | 1      | 62     | 61    | 0       | 61      | A    | 1           | 320393.138   | 0.170                      | 524.4798  |
| 62   | 1      | 62     | 61    | 1       | 61      | A    | 1           | 320393.138   | 0.170                      | 524.4798  |
| 62   | 0      | 62     | 61    | 0       | 61      | E    | 1           | 320402.393   | 0.059                      | 524.1200  |
| 62   | 1      | 62     | 61    | 1       | 61      | E    | 1           | 320402.393   | 0.059                      | 524.1200  |
| 50   | 14     | 37     | 49    | 14      | 36      | A    | 0           | 320419.164   | -0.058                     | 360.7826  |
| 50   | 14     | 37     | 49    | 14      | 36      | E    | 0           | 320423.647   | -0.052                     | 360.7849  |
| 62   | 0      | 62     | 61    | 0       | 61      | A    | 0           | 320483.596   | -0.142                     | 395.8525  |
| 62   | 0      | 62     | 61    | 1       | 61      | A    | 0           | 320483.596   | -0.142                     | 395.8525  |
| 62   | 1      | 62     | 61    | 0       | 61      | A    | 0           | 320483.596   | -0.142                     | 395.8525  |
| 62   | 1      | 62     | 61    | 1       | 61      | A    | 0           | 320483.596   | -0.142                     | 395.8525  |
| 62   | 0      | 62     | 61    | 0       | 61      | E    | 0           | 320483.596   | 0.156                      | 395.8637  |
| 62   | 1      | 62     | 61    | 1       | 61      | E    | 0           | 320483.596   | 0.156                      | 395.8637  |
| 51   | 19     | 33     | 50    | 19      | 32      | A    | 0           | 320514.088   | 0.227                      | 399.9582  |
| 51   | 19     | 32     | 50    | 19      | 31      | E    | 0           | 320517.708   | 0.001                      | 399.9583  |
| 51   | 19     | 33     | 50    | 19      | 32      | E    | 0           | 320519.100   | 0.079                      | 399.9474  |
| 52   | 10     | 42     | 51    | 10      | 41      | E    | 0           | 320550.188   | -0.037                     | 368.0380  |
| 52   | 10     | 42     | 51    | 10      | 41      | A    | 0           | 320557.899   | -0.071                     | 368.0345  |
| 57   | 29     | 29     | 57    | 28      | 30      | A    | 0           | 320715.984   | 0.002                      | 557.0726  |
| 57   | 29     | 28     | 57    | 28      | 29      | A    | 0           | 320715.984   | 0.002                      | 557.0726  |
| 51   | 12     | 40     | 50    | 12      | 39      | E    | 0           | 320782.272   | -0.015                     | 362.4398  |
| 51   | 12     | 40     | 50    | 12      | 39      | A    | 0           | 320788.291   | -0.010                     | 362.4361  |
| 52   | 11     | 42     | 51    | 10      | 41      | E    | 0           | 320898.940   | -0.008                     | 368.0380  |
| 50   | 15     | 35     | 49    | 15      | 34      | A    | 0           | 320948.127   | -0.056                     | 365.6238  |
| 50   | 15     | 35     | 49    | 15      | 34      | E    | 0           | 320953.677   | -0.010                     | 365.6252  |
| 56   | 29     | 28     | 56    | 28      | 29      | E    | 0           | 321052.947   | -0.198                     | 545.2507  |
| 56   | 29     | 28     | 56    | 28      | 29      | A    | 0           | 321074.272   | -0.039                     | 545.2622  |
| 56   | 29     | 27     | 56    | 28      | 28      | A    | 0           | 321074.272   | -0.039                     | 545.2622  |
| 56   | 29     | 27     | 56    | 28      | 28      | E    | 0           | 321099.957   | -0.067                     | 545.2512  |
| 55   | 29     | 27     | 55    | 28      | 28      | E    | 0           | 321392.364   | -0.062                     | 533.6531  |
| 55   | 29     | 27     | 55    | 28      | 28      | A    | 0           | 321413.326   | -0.023                     | 533.6647  |
| 55   | 29     | 26     | 55    | 28      | 27      | A    | 0           | 321413.326   | -0.023                     | 533.6647  |
| 55   | 29     | 26     | 55    | 28      | 27      | E    | 0           | 321439.323   | -0.033                     | 533.6537  |
| 51   | 18     | 34     | 50    | 18      | 33      | A    | 0           | 321593.943   | -0.025                     | 393.2942  |
| 51   | 18     | 33     | 50    | 18      | 32      | A    | 0           | 321599.746   | -0.129                     | 393.2944  |
| 51   | 18     | 33     | 50    | 18      | 32      | E    | 0           | 321600.897   | 0.071                      | 393.2961  |
| 51   | 18     | 34     | 50    | 18      | 33      | E    | 0           | 321602.861   | 0.029                      | 393.2846  |
| 54   | 29     | 26     | 54    | 28      | 27      | E    | 0           | 321713.149   | -0.075                     | 522.2680  |
| 54   | 29     | 26     | 54    | 28      | 27      | A    | 0           | 321733.805   | -0.112                     | 522.2797  |
| 54   | 29     | 25     | 54    | 28      | 26      | A    | 0           | 321733.805   | -0.112                     | 522.2797  |
| 52   | 30     | 22     | 51    | 30      | 21      | A    | 0           | 321741.655   | -0.017                     | 511.3095  |
| 52   | 30     | 23     | 51    | 30      | 22      | A    | 0           | 321741.655   | -0.017                     | 511.3095  |
| 52   | 30     | 22     | 51    | 30      | 21      | E    | 0           | 321741.655   | -0.249                     | 511.3004  |
| 54   | 29     | 25     | 54    | 28      | 26      | E    | 0           | 321760.142   | -0.057                     | 522.2686  |
| 52   | 29     | 24     | 51    | 29      | 23      | A    | 0           | 321985.147   | 0.033                      | 500.1573  |
| 52   | 29     | 23     | 51    | 29      | 22      | A    | 0           | 321985.147   | 0.033                      | 500.1573  |
| 52   | 29     | 23     | 51    | 29      | 22      | E    | 0           | 321985.147   | -0.397                     | 500.1471  |
| 53   | 29     | 25     | 53    | 28      | 26      | E    | 0           | 322016.243   | -0.082                     | 511.0952  |
| 53   | 29     | 25     | 53    | 28      | 26      | A    | 0           | 322036.740   | -0.058                     | 511.1069  |
| 53   | 29     | 24     | 53    | 28      | 25      | A    | 0           | 322036.740   | -0.058                     | 511.1069  |



| $J'$ | $K'_a$ | $K'_c$ | $J''$ | $K''_a$ | $K''_c$ | Sym. | $v_{tCH_3}$ | $\nu_{Obs.}$ | $\nu_{Obs.} - \nu_{Calc.}$ | $E_{low}$ |
|------|--------|--------|-------|---------|---------|------|-------------|--------------|----------------------------|-----------|
| 53   | 29     | 24     | 53    | 28      | 25      | E    | 0           | 322063.306   | -0.035                     | 511.0958  |
| 52   | 29     | 24     | 52    | 28      | 25      | E    | 0           | 322302.390   | -0.095                     | 500.1342  |
| 52   | 29     | 24     | 52    | 28      | 25      | A    | 0           | 322322.669   | -0.080                     | 500.1460  |
| 52   | 29     | 23     | 52    | 28      | 24      | A    | 0           | 322322.669   | -0.080                     | 500.1460  |
| 52   | 29     | 23     | 52    | 28      | 24      | E    | 0           | 322349.403   | -0.134                     | 500.1349  |
| 51   | 29     | 23     | 51    | 28      | 24      | E    | 0           | 322572.373   | -0.060                     | 489.3849  |
| 51   | 29     | 23     | 51    | 28      | 24      | A    | 0           | 322592.439   | -0.059                     | 489.3967  |
| 51   | 29     | 22     | 51    | 28      | 23      | A    | 0           | 322592.439   | -0.059                     | 489.3967  |
| 51   | 29     | 22     | 51    | 28      | 23      | E    | 0           | 322619.532   | 0.018                      | 489.3856  |
| 50   | 29     | 22     | 50    | 28      | 23      | E    | 0           | 322826.801   | -0.064                     | 478.8469  |
| 50   | 29     | 22     | 50    | 28      | 23      | A    | 0           | 322846.688   | -0.056                     | 478.8588  |
| 50   | 29     | 21     | 50    | 28      | 22      | A    | 0           | 322846.688   | -0.056                     | 478.8588  |
| 50   | 29     | 21     | 50    | 28      | 22      | E    | 0           | 322873.915   | -0.059                     | 478.8477  |
| 52   | 26     | 26     | 51    | 26      | 25      | A    | 0           | 322891.702   | -0.133                     | 469.0581  |
| 52   | 26     | 27     | 51    | 26      | 26      | A    | 0           | 322891.702   | -0.133                     | 469.0581  |
| 52   | 26     | 27     | 51    | 26      | 26      | E    | 0           | 322892.963   | -0.096                     | 469.0457  |
| 52   | 26     | 26     | 51    | 26      | 25      | E    | 0           | 322894.087   | 0.059                      | 469.0481  |
| 51   | 17     | 35     | 50    | 17      | 34      | A    | 0           | 322941.747   | -0.080                     | 387.0961  |
| 51   | 17     | 34     | 50    | 17      | 33      | E    | 0           | 322980.525   | -0.177                     | 387.1007  |
| 20   | 18     | 2      | 19    | 17      | 2       | E    | 0           | 322989.221   | -0.065                     | 161.3446  |
| 51   | 17     | 34     | 50    | 17      | 33      | A    | 0           | 322997.159   | -0.084                     | 387.0982  |
| 20   | 18     | 3      | 19    | 17      | 3       | E    | 0           | 323009.780   | 0.022                      | 161.3318  |
| 20   | 18     | 2      | 19    | 17      | 3       | A    | 0           | 323036.594   | -0.049                     | 161.3427  |
| 20   | 18     | 3      | 19    | 17      | 2       | A    | 0           | 323036.594   | -0.049                     | 161.3427  |
| 49   | 29     | 21     | 49    | 28      | 22      | E    | 0           | 323066.372   | -0.088                     | 468.5200  |
| 51   | 11     | 40     | 50    | 11      | 39      | E    | 0           | 323071.068   | -0.062                     | 362.2232  |
| 51   | 11     | 40     | 50    | 11      | 39      | A    | 0           | 323084.544   | -0.034                     | 362.2188  |
| 49   | 29     | 21     | 49    | 28      | 22      | A    | 0           | 323086.093   | -0.066                     | 468.5319  |
| 49   | 29     | 20     | 49    | 28      | 21      | A    | 0           | 323086.093   | -0.066                     | 468.5319  |
| 49   | 29     | 20     | 49    | 28      | 21      | E    | 0           | 323113.527   | -0.064                     | 468.5208  |
| 52   | 11     | 41     | 51    | 12      | 40      | A    | 0           | 323245.175   | -0.027                     | 373.1365  |
| 52   | 11     | 41     | 51    | 12      | 40      | E    | 0           | 323249.724   | -0.036                     | 373.1399  |
| 52   | 25     | 28     | 51    | 25      | 27      | A    | 0           | 323271.085   | -0.072                     | 459.4845  |
| 52   | 25     | 27     | 51    | 25      | 26      | A    | 0           | 323271.085   | -0.072                     | 459.4845  |
| 48   | 29     | 20     | 48    | 28      | 21      | E    | 0           | 323291.775   | -0.091                     | 458.4038  |
| 48   | 29     | 20     | 48    | 28      | 21      | A    | 0           | 323311.309   | -0.087                     | 458.4158  |
| 48   | 29     | 19     | 48    | 28      | 20      | A    | 0           | 323311.309   | -0.087                     | 458.4158  |
| 47   | 29     | 19     | 47    | 28      | 20      | E    | 0           | 323503.679   | -0.032                     | 448.4982  |
| 47   | 29     | 19     | 47    | 28      | 20      | A    | 0           | 323523.015   | -0.066                     | 448.5102  |
| 47   | 29     | 18     | 47    | 28      | 19      | E    | 0           | 323523.015   | -0.066                     | 448.5102  |
| 47   | 29     | 18     | 47    | 28      | 19      | A    | 0           | 323550.876   | -0.000                     | 448.4990  |
| 46   | 29     | 18     | 46    | 28      | 19      | A    | 0           | 323721.731   | -0.089                     | 438.8149  |
| 46   | 29     | 17     | 46    | 28      | 18      | E    | 0           | 323721.731   | -0.089                     | 438.8149  |
| 46   | 29     | 17     | 46    | 28      | 18      | A    | 0           | 323749.634   | -0.144                     | 438.8037  |
| 22   | 17     | 5      | 21    | 16      | 5       | E    | 0           | 323843.281   | -0.076                     | 163.4885  |
| 22   | 17     | 6      | 21    | 16      | 6       | E    | 0           | 323858.674   | 0.023                      | 163.4752  |
| 22   | 17     | 6      | 21    | 16      | 5       | A    | 0           | 323889.904   | -0.038                     | 163.4850  |
| 22   | 17     | 5      | 21    | 16      | 6       | A    | 0           | 323889.904   | -0.038                     | 163.4850  |
| 45   | 29     | 17     | 45    | 28      | 18      | A    | 0           | 323908.109   | -0.087                     | 429.3295  |
| 45   | 29     | 16     | 45    | 28      | 17      | A    | 0           | 323908.109   | -0.087                     | 429.3295  |
| 45   | 29     | 16     | 45    | 28      | 17      | E    | 0           | 323936.274   | -0.033                     | 429.3183  |
| 49   | 12     | 37     | 48    | 12      | 36      | E    | 0           | 323988.131   | -0.025                     | 344.2577  |
| 49   | 12     | 37     | 48    | 12      | 36      | A    | 0           | 323997.396   | -0.043                     | 344.2511  |
| 44   | 29     | 16     | 44    | 28      | 17      | E    | 0           | 324063.828   | -0.006                     | 420.0418  |
| 44   | 29     | 16     | 44    | 28      | 17      | A    | 0           | 324082.729   | -0.047                     | 420.0539  |
| 44   | 29     | 15     | 44    | 28      | 16      | A    | 0           | 324082.729   | -0.047                     | 420.0539  |
| 44   | 29     | 15     | 44    | 28      | 16      | E    | 0           | 324111.009   | -0.020                     | 420.0427  |
| 52   | 23     | 30     | 51    | 23      | 29      | A    | 0           | 324194.277   | -0.195                     | 441.5446  |
| 52   | 23     | 29     | 51    | 23      | 28      | A    | 0           | 324194.277   | -0.195                     | 441.5446  |
| 43   | 29     | 15     | 43    | 28      | 16      | E    | 0           | 324227.235   | -0.055                     | 410.9757  |
| 43   | 29     | 15     | 43    | 28      | 16      | A    | 0           | 324246.035   | -0.071                     | 410.9879  |
| 43   | 29     | 14     | 43    | 28      | 15      | A    | 0           | 324246.035   | -0.071                     | 410.9879  |
| 56   | 7      | 49     | 55    | 7       | 48      | A    | 1           | 324349.725   | -0.043                     | 520.4100  |
| 56   | 7      | 49     | 55    | 8       | 48      | A    | 1           | 324349.725   | -0.018                     | 520.4100  |
| 56   | 8      | 49     | 55    | 7       | 48      | A    | 1           | 324349.725   | -0.056                     | 520.4100  |
| 56   | 8      | 49     | 55    | 8       | 48      | A    | 1           | 324349.725   | -0.031                     | 520.4100  |
| 42   | 29     | 14     | 42    | 28      | 15      | E    | 0           | 324380.006   | -0.011                     | 402.1189  |
| 55   | 8      | 47     | 54    | 9       | 46      | A    | 1           | 324392.915   | 0.020                      | 516.5181  |
| 55   | 9      | 47     | 54    | 8       | 46      | A    | 1           | 324394.072   | -0.016                     | 516.5181  |
| 42   | 29     | 14     | 42    | 28      | 15      | A    | 0           | 324398.645   | -0.068                     | 402.1311  |
| 42   | 29     | 13     | 42    | 28      | 14      | A    | 0           | 324398.645   | -0.068                     | 402.1311  |
| 57   | 6      | 51     | 56    | 6       | 50      | A    | 1           | 324406.707   | -0.101                     | 523.8196  |
| 57   | 6      | 51     | 56    | 7       | 50      | A    | 1           | 324406.707   | -0.101                     | 523.8196  |
| 57   | 7      | 51     | 56    | 6       | 50      | A    | 1           | 324406.707   | -0.102                     | 523.8196  |
| 57   | 7      | 51     | 56    | 7       | 50      | A    | 1           | 324406.707   | -0.101                     | 523.8196  |
| 58   | 5      | 53     | 57    | 5       | 52      | A    | 1           | 324526.564   | -0.139                     | 526.7715  |
| 58   | 5      | 53     | 57    | 6       | 52      | A    | 1           | 324526.564   | -0.139                     | 526.7715  |
| 58   | 6      | 53     | 57    | 5       | 52      | A    | 1           | 324526.564   | -0.139                     | 526.7715  |
| 58   | 6      | 53     | 57    | 6       | 52      | A    | 1           | 324526.564   | -0.139                     | 526.7715  |
| 57   | 6      | 51     | 56    | 6       | 50      | E    | 1           | 324538.839   | -0.075                     | 523.6888  |
| 57   | 6      | 51     | 56    | 7       | 50      | E    | 1           | 324538.839   | -0.074                     | 523.6888  |
| 57   | 7      | 51     | 56    | 6       | 50      | E    | 1           | 324538.839   | -0.075                     | 523.6888  |
| 57   | 7      | 51     | 56    | 7       | 50      | E    | 1           | 324538.839   | -0.075                     | 523.6888  |
| 41   | 29     | 13     | 41    | 28      | 14      | A    | 0           | 324541.023   | -0.085                     | 393.4833  |
| 41   | 29     | 12     | 41    | 28      | 13      | A    | 0           | 324541.023   | -0.085                     | 393.4833  |
| 55   | 8      | 47     | 54    | 9       | 46      | E    | 1           | 324558.301   | 0.024                      | 516.4131  |
| 55   | 9      | 47     | 54    | 8       | 46      | E    | 1           | 324559.763   | 0.030                      | 516.4130  |
| 56   | 7      | 49     | 55    | 7       | 48      | E    | 0           | 324562.711   | -0.035                     | 392.0006  |
| 56   | 8      | 49     | 55    | 8       | 48      | E    | 0           | 324562.711   | -0.021                     | 392.0006  |
| 56   | 7      | 49     | 55    | 7       | 48      | A    | 0           | 324567.294   | -0.028                     | 391.9970  |
| 56   | 7      | 49     | 55    | 8       | 48      | A    | 0           | 324567.294   | 0.001                      | 391.9970  |
| 56   | 8      | 49     | 55    | 7       | 48      | A    | 0           | 324567.294   | -0.043                     | 391.9970  |
| 56   | 8      | 49     | 55    | 8       | 48      | A    | 0           | 324567.294   | -0.014                     | 391.9970  |
| 41   | 29     | 12     | 41    | 28      | 13      | E    | 0           | 324569.778   | 0.054                      | 393.4721  |
| 54   | 9      | 45     | 53    | 10      | 44      | A    | 1           | 324593.244   | 0.182                      | 512.1088  |
| 54   | 10     | 45     | 53    | 10      | 44      | A    | 1           | 324603.362   | 0.023                      | 512.1088  |
| 57   | 6      | 51     | 56    | 6       | 50      | E    | 0           | 324606.169   | -0.029                     | 395.3952  |
| 57   | 7      | 51     | 56    | 7       | 50      | E    | 0           | 324606.169   | -0.029                     | 395.3952  |
| 57   | 6      | 51     | 56    | 6       | 50      | A    | 0           | 324610.268   | -0.015                     | 395.3911  |
| 57   | 6      | 51     | 56    | 7       | 50      | A    | 0           | 324610.268   | -0.014                     | 395.3911  |
| 57   | 7      | 51     | 56    | 6       | 50      | A    | 0           | 324610.268   | -0.015                     | 395.3911  |
| 57   | 7      | 51     | 56    | 7       | 50      | A    | 0           | 324610.268   | -0.014                     | 395.3911  |
| 55   | 8      | 47     | 54    | 9       | 46      | A    | 0           | 324625.518   | 0.146                      | 388.1165  |
| 49   | 12     | 38     | 48    | 11      | 37      | E    | 0           | 324625.518   | -0.198                     | 341.0854  |
| 55   | 9      | 47     | 54    | 8       | 46      | A    | 0           | 324626.731   | 0.015                      | 388.1165  |
| 58   | 5      | 53     | 57    | 5       | 52      | E    | 1           | 324643.582   | 0.032                      | 526.6195  |
| 58   | 5      | 53     | 57    | 6       | 52      | E    | 1           | 324643.582   | 0.032                      | 526.6195  |
| 58   | 6      | 53     | 57    | 5       | 52      | E    | 1           | 324643.582   | 0.032                      | 526.6195  |
| 58   | 6      | 53     | 57    | 6       | 52      | E    | 1           | 324643.582   | 0.032                      | 526.6195  |
| 24   | 16     | 8      | 23    | 15      | 8       | E    | 0           | 324656.159   | -0.062                     | 166.8645  |
| 24   | 16     | 9      | 23    | 15      | 9       | E    | 0           | 324666.114   | 0.076                      | 166.8509  |
| 40   | 29     | 12     | 40    | 28      | 13      | A    | 0           | 324673.739   | -0.047                     | 385.0444  |
| 40   | 29     | 11     | 40    | 28      | 12      | A    | 0           | 324673.739   | -0.047                     | 385.0444  |
| 59   | 4      | 55     | 58    | 4       | 54      | A    | 1           | 324686.852   | -0.130                     | 529.2835  |
| 59   | 4      | 55     | 58    | 5       | 54      | A    | 1           | 324686.852   | -0.130                     | 529.2835  |
| 59   | 5      | 55     | 58    | 4       | 54      | A    | 1           | 324686.852   | -0.130                     | 529.2835  |



| $J'$ | $K'_a$ | $K'_c$ | $J''$ | $K''_a$ | $K''_c$ | Sym. | $v_{tCH_3}$ | $\nu_{Obs.}$ | $\nu_{Obs.} - \nu_{Calc.}$ | $E_{low}$ |
|------|--------|--------|-------|---------|---------|------|-------------|--------------|----------------------------|-----------|
| 59   | 5      | 55     | 58    | 5       | 54      | A    | 1           | 324686.852   | -0.130                     | 529.2835  |
| 24   | 16     | 8      | 23    | 15      | 9       | A    | 0           | 324701.319   | -0.058                     | 166.8595  |
| 24   | 16     | 9      | 23    | 15      | 8       | A    | 0           | 324701.319   | -0.058                     | 166.8595  |
| 58   | 5      | 53     | 57    | 5       | 52      | E    | 0           | 324712.359   | -0.018                     | 398.3280  |
| 58   | 6      | 53     | 57    | 6       | 52      | E    | 0           | 324712.359   | -0.018                     | 398.3280  |
| 58   | 5      | 53     | 57    | 5       | 52      | A    | 0           | 324715.975   | -0.008                     | 398.3232  |
| 58   | 5      | 53     | 57    | 6       | 52      | A    | 0           | 324715.975   | -0.008                     | 398.3232  |
| 58   | 6      | 53     | 57    | 5       | 52      | A    | 0           | 324715.975   | -0.008                     | 398.3232  |
| 58   | 6      | 53     | 57    | 6       | 52      | A    | 0           | 324715.975   | -0.008                     | 398.3232  |
| 52   | 22     | 30     | 51    | 22      | 29      | A    | 0           | 324763.582   | -0.057                     | 433.1871  |
| 52   | 22     | 31     | 51    | 22      | 30      | A    | 0           | 324763.582   | -0.057                     | 433.1871  |
| 52   | 22     | 31     | 51    | 22      | 30      | E    | 0           | 324766.592   | -0.003                     | 433.1745  |
| 59   | 4      | 55     | 58    | 4       | 54      | E    | 1           | 324787.811   | 0.028                      | 529.1044  |
| 59   | 4      | 55     | 58    | 5       | 54      | E    | 1           | 324787.811   | 0.028                      | 529.1044  |
| 59   | 5      | 55     | 58    | 4       | 54      | E    | 1           | 324787.811   | 0.028                      | 529.1044  |
| 59   | 5      | 55     | 58    | 5       | 54      | E    | 1           | 324787.811   | 0.028                      | 529.1044  |
| 39   | 29     | 11     | 39    | 28      | 12      | A    | 0           | 324797.183   | -0.042                     | 376.8141  |
| 39   | 29     | 10     | 39    | 28      | 11      | A    | 0           | 324797.183   | -0.042                     | 376.8141  |
| 54   | 10     | 45     | 53    | 9       | 44      | E    | 1           | 324812.690   | -0.131                     | 512.0073  |
| 39   | 29     | 10     | 39    | 28      | 11      | E    | 0           | 324826.029   | -0.010                     | 376.8029  |
| 54   | 9      | 45     | 53    | 10      | 44      | E    | 0           | 324835.995   | -0.044                     | 383.7176  |
| 54   | 9      | 45     | 53    | 10      | 44      | A    | 0           | 324841.759   | -0.038                     | 383.7145  |
| 54   | 10     | 45     | 53    | 10      | 44      | E    | 0           | 324847.318   | -0.048                     | 383.7176  |
| 54   | 10     | 45     | 53    | 10      | 44      | A    | 0           | 324853.159   | -0.030                     | 383.7145  |
| 54   | 9      | 45     | 53    | 9       | 44      | E    | 0           | 324856.229   | 0.003                      | 383.7170  |
| 59   | 4      | 55     | 58    | 4       | 54      | E    | 0           | 324858.073   | -0.015                     | 400.8166  |
| 59   | 5      | 55     | 58    | 5       | 54      | E    | 0           | 324858.073   | -0.015                     | 400.8166  |
| 59   | 4      | 55     | 58    | 4       | 54      | A    | 0           | 324861.188   | -0.003                     | 400.8110  |
| 59   | 4      | 55     | 58    | 5       | 54      | A    | 0           | 324861.188   | -0.003                     | 400.8110  |
| 59   | 5      | 55     | 58    | 4       | 54      | A    | 0           | 324861.188   | -0.003                     | 400.8110  |
| 59   | 5      | 55     | 58    | 5       | 54      | A    | 0           | 324861.188   | -0.003                     | 400.8110  |
| 54   | 10     | 45     | 53    | 9       | 44      | E    | 0           | 324867.514   | -0.038                     | 383.7170  |
| 60   | 3      | 57     | 59    | 3       | 56      | A    | 1           | 324873.513   | -0.142                     | 531.3692  |
| 60   | 3      | 57     | 59    | 4       | 56      | A    | 1           | 324873.513   | -0.142                     | 531.3692  |
| 60   | 4      | 57     | 59    | 3       | 56      | A    | 1           | 324873.513   | -0.142                     | 531.3692  |
| 60   | 4      | 57     | 59    | 4       | 56      | A    | 1           | 324873.513   | -0.142                     | 531.3692  |
| 38   | 29     | 10     | 38    | 28      | 11      | A    | 0           | 324911.800   | -0.087                     | 368.7923  |
| 38   | 29     | 9      | 38    | 28      | 10      | A    | 0           | 324911.800   | -0.087                     | 368.7923  |
| 49   | 13     | 36     | 48    | 13      | 35      | E    | 0           | 324913.395   | -0.091                     | 347.0442  |
| 49   | 13     | 36     | 48    | 13      | 35      | E    | 0           | 324923.669   | -0.059                     | 347.0498  |
| 38   | 29     | 9      | 38    | 28      | 10      | E    | 0           | 324940.789   | 0.002                      | 368.7810  |
| 60   | 3      | 57     | 59    | 3       | 56      | E    | 1           | 324956.643   | 0.003                      | 531.1566  |
| 60   | 3      | 57     | 59    | 4       | 56      | E    | 1           | 324956.643   | 0.003                      | 531.1566  |
| 60   | 4      | 57     | 59    | 3       | 56      | E    | 1           | 324956.643   | 0.003                      | 531.1566  |
| 60   | 4      | 57     | 59    | 4       | 56      | E    | 1           | 324956.643   | 0.003                      | 531.1566  |
| 32   | 12     | 21     | 31    | 11      | 20      | A    | 0           | 324988.921   | -0.032                     | 193.2289  |
| 37   | 29     | 9      | 37    | 28      | 10      | E    | 0           | 325000.009   | -0.010                     | 360.9663  |
| 51   | 16     | 35     | 50    | 16      | 34      | E    | 0           | 325001.317   | 0.028                      | 381.4106  |
| 51   | 16     | 35     | 50    | 16      | 34      | A    | 0           | 325014.443   | -0.049                     | 381.4096  |
| 37   | 29     | 9      | 37    | 28      | 10      | A    | 0           | 325018.129   | -0.091                     | 360.9786  |
| 37   | 29     | 8      | 37    | 28      | 9       | A    | 0           | 325018.129   | -0.091                     | 360.9786  |
| 60   | 3      | 57     | 59    | 3       | 56      | E    | 0           | 325028.693   | -0.021                     | 402.8743  |
| 60   | 4      | 57     | 59    | 4       | 56      | E    | 0           | 325028.693   | -0.021                     | 402.8743  |
| 60   | 3      | 57     | 59    | 3       | 56      | A    | 0           | 325031.247   | -0.017                     | 402.8676  |
| 60   | 3      | 57     | 59    | 4       | 56      | A    | 0           | 325031.247   | -0.017                     | 402.8676  |
| 60   | 4      | 57     | 59    | 3       | 56      | A    | 0           | 325031.247   | -0.017                     | 402.8676  |
| 60   | 4      | 57     | 59    | 4       | 56      | A    | 0           | 325031.247   | -0.017                     | 402.8676  |
| 37   | 29     | 8      | 37    | 28      | 9       | E    | 0           | 325047.204   | 0.004                      | 360.9673  |
| 53   | 10     | 43     | 52    | 11      | 42      | E    | 1           | 325065.062   | 0.040                      | 507.0273  |
| 32   | 12     | 20     | 31    | 11      | 20      | E    | 0           | 325070.945   | -0.054                     | 193.2363  |
| 61   | 2      | 59     | 60    | 2       | 58      | A    | 1           | 325077.679   | -0.078                     | 533.0394  |
| 61   | 2      | 59     | 60    | 3       | 58      | A    | 1           | 325077.679   | -0.078                     | 533.0394  |
| 61   | 3      | 59     | 60    | 2       | 58      | A    | 1           | 325077.679   | -0.078                     | 533.0394  |
| 61   | 3      | 59     | 60    | 3       | 58      | A    | 1           | 325077.679   | -0.078                     | 533.0394  |
| 51   | 13     | 39     | 50    | 13      | 38      | E    | 0           | 325098.310   | 0.084                      | 366.9983  |
| 51   | 13     | 39     | 50    | 13      | 38      | A    | 0           | 325100.557   | -0.039                     | 366.9950  |
| 36   | 29     | 8      | 36    | 28      | 9       | A    | 0           | 325116.574   | -0.084                     | 353.3729  |
| 36   | 29     | 7      | 36    | 28      | 8       | A    | 0           | 325116.574   | -0.084                     | 353.3729  |
| 53   | 10     | 43     | 52    | 11      | 42      | E    | 0           | 325128.040   | -0.044                     | 378.7421  |
| 53   | 10     | 43     | 52    | 11      | 42      | A    | 0           | 325133.632   | -0.044                     | 378.7388  |
| 32   | 12     | 21     | 31    | 11      | 21      | E    | 0           | 325136.769   | -0.234                     | 193.2213  |
| 61   | 2      | 59     | 60    | 2       | 58      | E    | 1           | 325140.234   | 0.016                      | 532.7862  |
| 61   | 2      | 59     | 60    | 3       | 58      | E    | 1           | 325140.234   | 0.016                      | 532.7862  |
| 61   | 3      | 59     | 60    | 2       | 58      | E    | 1           | 325140.234   | 0.016                      | 532.7862  |
| 61   | 3      | 59     | 60    | 3       | 58      | E    | 1           | 325140.234   | 0.016                      | 532.7862  |
| 35   | 29     | 7      | 35    | 28      | 8       | A    | 0           | 325207.546   | -0.074                     | 345.9751  |
| 35   | 29     | 6      | 35    | 28      | 7       | A    | 0           | 325207.546   | -0.074                     | 345.9751  |
| 61   | 2      | 59     | 60    | 2       | 58      | E    | 0           | 325214.684   | 0.002                      | 404.5112  |
| 61   | 3      | 59     | 60    | 3       | 58      | E    | 0           | 325214.684   | 0.002                      | 404.5112  |
| 61   | 2      | 59     | 60    | 2       | 58      | A    | 0           | 325216.583   | -0.014                     | 404.5033  |
| 61   | 2      | 59     | 60    | 3       | 58      | A    | 0           | 325216.583   | -0.014                     | 404.5033  |
| 61   | 3      | 59     | 60    | 2       | 58      | A    | 0           | 325216.583   | -0.014                     | 404.5033  |
| 61   | 3      | 59     | 60    | 3       | 58      | A    | 0           | 325216.583   | -0.014                     | 404.5033  |
| 35   | 29     | 6      | 35    | 28      | 7       | E    | 0           | 325236.735   | -0.001                     | 345.9638  |
| 53   | 11     | 43     | 52    | 11      | 42      | E    | 1           | 325285.463   | -0.078                     | 507.0273  |
| 62   | 1      | 61     | 61    | 1       | 60      | A    | 1           | 325293.496   | 0.009                      | 534.3029  |
| 62   | 1      | 61     | 61    | 2       | 60      | A    | 1           | 325293.496   | 0.009                      | 534.3029  |
| 62   | 2      | 61     | 61    | 1       | 60      | A    | 1           | 325293.496   | 0.009                      | 534.3029  |
| 62   | 2      | 61     | 61    | 2       | 60      | A    | 1           | 325293.496   | 0.009                      | 534.3029  |
| 34   | 29     | 5      | 34    | 28      | 6       | E    | 0           | 325320.708   | 0.023                      | 338.7736  |
| 62   | 1      | 61     | 61    | 1       | 60      | E    | 1           | 325331.777   | 0.038                      | 534.0011  |
| 62   | 2      | 61     | 61    | 2       | 60      | E    | 1           | 325331.777   | 0.038                      | 534.0011  |
| 53   | 11     | 43     | 52    | 11      | 42      | E    | 0           | 325333.972   | -0.029                     | 378.7421  |
| 53   | 11     | 43     | 52    | 11      | 42      | A    | 0           | 325340.583   | -0.042                     | 378.7388  |
| 50   | 12     | 39     | 49    | 11      | 38      | E    | 0           | 325361.882   | -0.040                     | 351.5869  |
| 26   | 15     | 11     | 25    | 14      | 11      | E    | 0           | 325373.434   | -0.087                     | 171.4897  |
| 26   | 15     | 12     | 25    | 14      | 12      | E    | 0           | 325377.543   | -0.009                     | 171.4761  |
| 62   | 1      | 61     | 61    | 1       | 60      | E    | 0           | 325409.496   | -0.049                     | 405.7355  |
| 62   | 2      | 61     | 61    | 2       | 60      | E    | 0           | 325409.496   | -0.049                     | 405.7355  |
| 62   | 1      | 61     | 61    | 1       | 60      | A    | 0           | 325410.749   | 0.030                      | 405.7261  |
| 62   | 1      | 61     | 61    | 2       | 60      | A    | 0           | 325410.749   | 0.030                      | 405.7261  |
| 62   | 2      | 61     | 61    | 1       | 60      | A    | 0           | 325410.749   | 0.030                      | 405.7261  |
| 62   | 2      | 61     | 61    | 2       | 60      | A    | 0           | 325410.749   | 0.030                      | 405.7261  |
| 26   | 15     | 12     | 25    | 14      | 11      | A    | 0           | 325416.536   | -0.052                     | 171.4832  |
| 26   | 15     | 11     | 25    | 14      | 12      | A    | 0           | 325416.536   | -0.052                     | 171.4832  |
| 52   | 21     | 32     | 51    | 21      | 31      | A    | 0           | 325428.496   | -0.005                     | 425.2460  |
| 52   | 21     | 31     | 51    | 21      | 30      | E    | 0           | 325431.924   | 0.102                      | 425.2429  |
| 53   | 10     | 43     | 52    | 10      | 42      | E    | 0           | 325476.767   | -0.039                     | 378.7304  |
| 53   | 10     | 43     | 52    | 10      | 42      | A    | 0           | 325484.065   | -0.015                     | 378.7271  |
| 63   | 0      | 63     | 62    | 0       | 62      | A    | 1           | 325517.287   | 0.152                      | 535.1669  |
| 63   | 0      | 63     | 62    | 1       | 62      | A    | 1           | 325517.287   | 0.152                      | 535.1669  |
| 63   | 1      | 63     | 62    | 0       | 62      | A    | 1           | 325517.287   | 0.152                      | 535.1669  |
| 63   | 1      | 63     | 62    | 1       | 62      | A    | 1           | 325517.287   | 0.152                      | 535.1669  |
| 63   | 0      | 63     | 62    | 0       | 62      | E    | 1           | 325526.458   | 0.040                      | 534.8074  |
| 63   | 1      | 63     | 62    | 1       | 62      | E    | 1           | 325526.458   | 0.040                      | 534.8074  |
| 63   | 0      | 63     | 62    | 0       | 62      | A    | 0           | 325609.013   | -0.160                     | 406.5427  |



| $J'$ | $K'_a$ | $K'_c$ | $J''$ | $K''_a$ | $K''_c$ | Sym. | $v_{tCH_3}$ | $\nu_{Obs.}$ | $\nu_{Obs.} - \nu_{Calc.}$ | $E_{low}$ |
|------|--------|--------|-------|---------|---------|------|-------------|--------------|----------------------------|-----------|
| 63   | 0      | 63     | 62    | 1       | 62      | A    | 0           | 325609.013   | -0.160                     | 406.5427  |
| 63   | 1      | 63     | 62    | 0       | 62      | A    | 0           | 325609.013   | -0.160                     | 406.5427  |
| 63   | 1      | 63     | 62    | 1       | 62      | A    | 0           | 325609.013   | -0.160                     | 406.5427  |
| 63   | 0      | 63     | 62    | 0       | 62      | E    | 0           | 325609.013   | 0.135                      | 406.5539  |
| 63   | 1      | 63     | 62    | 1       | 62      | E    | 0           | 325609.013   | 0.135                      | 406.5539  |
| 53   | 11     | 43     | 52    | 10      | 42      | E    | 0           | 325682.659   | -0.065                     | 378.7304  |
| 53   | 11     | 43     | 52    | 10      | 42      | A    | 0           | 325690.999   | -0.030                     | 378.7271  |
| 34   | 11     | 23     | 33    | 10      | 24      | E    | 0           | 325811.627   | -0.069                     | 203.3206  |
| 34   | 11     | 23     | 33    | 10      | 24      | A    | 0           | 325823.192   | -0.047                     | 203.3148  |
| 52   | 12     | 41     | 51    | 12      | 40      | E    | 1           | 325868.925   | 0.060                      | 501.4183  |
| 28   | 14     | 15     | 27    | 13      | 15      | E    | 0           | 325886.303   | 0.147                      | 177.3774  |
| 28   | 14     | 14     | 27    | 13      | 14      | E    | 0           | 325888.156   | -0.163                     | 177.3909  |
| 52   | 12     | 41     | 51    | 12      | 40      | E    | 0           | 325918.802   | -0.016                     | 373.1399  |
| 52   | 12     | 41     | 51    | 12      | 40      | A    | 0           | 325925.236   | -0.032                     | 373.1365  |
| 28   | 14     | 15     | 27    | 13      | 14      | A    | 0           | 325928.594   | -0.013                     | 177.3830  |
| 30   | 13     | 18     | 29    | 12      | 18      | E    | 0           | 325969.078   | -0.039                     | 184.5995  |
| 30   | 13     | 17     | 29    | 12      | 17      | E    | 0           | 325978.091   | -0.095                     | 184.6125  |
| 53   | 12     | 41     | 52    | 13      | 40      | A    | 0           | 325999.677   | -0.058                     | 388.8701  |
| 30   | 13     | 18     | 29    | 12      | 17      | A    | 0           | 326012.266   | -0.141                     | 184.6033  |
| 30   | 13     | 17     | 29    | 12      | 18      | A    | 0           | 326017.655   | -0.007                     | 184.6032  |
| 53   | 12     | 41     | 52    | 13      | 40      | E    | 0           | 326030.440   | -0.029                     | 388.8733  |
| 52   | 20     | 33     | 51    | 20      | 32      | A    | 0           | 326215.839   | -0.060                     | 417.7296  |
| 51   | 15     | 37     | 50    | 15      | 36      | A    | 0           | 326269.410   | -0.008                     | 376.1988  |
| 51   | 15     | 37     | 50    | 15      | 36      | E    | 0           | 326278.366   | -0.063                     | 376.1995  |
| 70   | 30     | 40     | 70    | 29      | 41      | E    | 0           | 326537.598   | 0.144                      | 740.5988  |
| 50   | 14     | 36     | 49    | 14      | 35      | A    | 0           | 326867.317   | -0.067                     | 361.2232  |
| 50   | 14     | 36     | 49    | 14      | 35      | E    | 0           | 326883.207   | -0.100                     | 361.2267  |
| 51   | 14     | 38     | 50    | 14      | 37      | E    | 0           | 326908.863   | -0.084                     | 371.4730  |
| 69   | 30     | 39     | 69    | 29      | 40      | A    | 0           | 327137.854   | -0.008                     | 726.0209  |
| 69   | 30     | 40     | 69    | 29      | 41      | A    | 0           | 327137.854   | -0.008                     | 726.0209  |
| 69   | 30     | 39     | 69    | 29      | 40      | E    | 0           | 327163.124   | -0.111                     | 726.0112  |
| 52   | 19     | 34     | 51    | 19      | 33      | A    | 0           | 327164.530   | -0.136                     | 410.6494  |
| 52   | 19     | 33     | 51    | 19      | 32      | A    | 0           | 327165.671   | -0.060                     | 410.6494  |
| 52   | 19     | 33     | 51    | 19      | 32      | E    | 0           | 327168.952   | -0.054                     | 410.6496  |
| 52   | 19     | 34     | 51    | 19      | 33      | E    | 0           | 327170.395   | -0.058                     | 410.6388  |
| 47   | 12     | 36     | 46    | 11      | 35      | E    | 0           | 327250.912   | -0.061                     | 320.4835  |
| 47   | 12     | 36     | 46    | 11      | 35      | A    | 0           | 327324.148   | -0.006                     | 320.4769  |
| 52   | 11     | 41     | 51    | 11      | 40      | E    | 0           | 327453.053   | -0.083                     | 372.9997  |
| 52   | 11     | 41     | 51    | 11      | 40      | A    | 0           | 327464.973   | -0.036                     | 372.9957  |
| 53   | 32     | 21     | 52    | 32      | 20      | A    | 0           | 327608.505   | -0.089                     | 545.5019  |
| 53   | 32     | 22     | 52    | 32      | 20      | E    | 0           | 327608.505   | -0.089                     | 545.5019  |
| 53   | 32     | 21     | 52    | 32      | 20      | E    | 0           | 327608.505   | -0.014                     | 545.4952  |
| 68   | 30     | 38     | 68    | 29      | 39      | A    | 0           | 327733.389   | -0.019                     | 711.6502  |
| 68   | 30     | 39     | 68    | 29      | 40      | A    | 0           | 327733.389   | -0.019                     | 711.6502  |
| 19   | 19     | 0      | 18    | 18      | 0       | E    | 0           | 328268.245   | -0.082                     | 164.1139  |
| 67   | 30     | 38     | 67    | 29      | 39      | E    | 0           | 328281.180   | -0.149                     | 697.4848  |
| 19   | 19     | 1      | 18    | 18      | 1       | E    | 0           | 328293.658   | 0.025                      | 164.1018  |
| 67   | 30     | 37     | 67    | 29      | 38      | A    | 0           | 328300.524   | -0.002                     | 697.4959  |
| 67   | 30     | 38     | 67    | 29      | 39      | A    | 0           | 328300.524   | -0.002                     | 697.4959  |
| 53   | 29     | 25     | 52    | 29      | 24      | A    | 0           | 328313.117   | 0.077                      | 510.8975  |
| 53   | 29     | 24     | 52    | 29      | 23      | A    | 0           | 328313.117   | 0.077                      | 510.8975  |
| 53   | 29     | 24     | 52    | 29      | 23      | E    | 0           | 328313.117   | -0.397                     | 510.8873  |
| 19   | 19     | 1      | 18    | 18      | 0       | A    | 0           | 328315.751   | -0.044                     | 164.1136  |
| 19   | 19     | 0      | 18    | 18      | 1       | A    | 0           | 328315.751   | -0.044                     | 164.1136  |
| 52   | 18     | 35     | 51    | 18      | 34      | A    | 0           | 328331.674   | -0.067                     | 404.0214  |
| 52   | 18     | 34     | 51    | 18      | 33      | E    | 0           | 328341.640   | -0.097                     | 404.0235  |
| 51   | 15     | 36     | 50    | 15      | 35      | A    | 0           | 328693.576   | -0.062                     | 376.3295  |
| 51   | 15     | 36     | 50    | 15      | 35      | E    | 0           | 328703.455   | -0.027                     | 376.3311  |
| 50   | 12     | 38     | 49    | 12      | 37      | E    | 0           | 328751.237   | -0.068                     | 355.0648  |
| 50   | 12     | 38     | 49    | 12      | 37      | A    | 0           | 328764.783   | -0.024                     | 355.0585  |
| 66   | 30     | 37     | 66    | 29      | 38      | E    | 0           | 328821.483   | -0.117                     | 683.5464  |
| 66   | 30     | 36     | 66    | 29      | 37      | A    | 0           | 328840.373   | -0.041                     | 683.5576  |
| 66   | 30     | 37     | 66    | 29      | 38      | A    | 0           | 328840.373   | -0.041                     | 683.5576  |
| 21   | 18     | 3      | 20    | 17      | 3       | E    | 0           | 329133.220   | -0.071                     | 165.4524  |
| 21   | 18     | 4      | 20    | 17      | 4       | E    | 0           | 329153.744   | 0.013                      | 165.4397  |
| 21   | 18     | 3      | 20    | 17      | 4       | A    | 0           | 329180.570   | -0.068                     | 165.4505  |
| 21   | 18     | 4      | 20    | 17      | 3       | A    | 0           | 329180.570   | -0.068                     | 165.4505  |
| 53   | 11     | 42     | 52    | 12      | 41      | A    | 0           | 329329.381   | 0.214                      | 384.0082  |
| 53   | 11     | 42     | 52    | 12      | 41      | E    | 0           | 329329.381   | -0.282                     | 384.0114  |
| 65   | 30     | 36     | 65    | 29      | 37      | E    | 0           | 329335.627   | -0.140                     | 669.8235  |
| 65   | 30     | 35     | 65    | 29      | 36      | A    | 0           | 329354.193   | -0.018                     | 669.8349  |
| 65   | 30     | 36     | 65    | 29      | 37      | A    | 0           | 329354.193   | -0.018                     | 669.8349  |
| 55   | 13     | 42     | 54    | 14      | 41      | A    | 0           | 329372.700   | -0.116                     | 416.3286  |
| 65   | 30     | 35     | 65    | 29      | 36      | E    | 0           | 329381.435   | -0.069                     | 669.8251  |
| 55   | 13     | 42     | 54    | 14      | 41      | E    | 0           | 329435.034   | -0.027                     | 416.3311  |
| 57   | 7      | 50     | 56    | 7       | 49      | A    | 1           | 329456.145   | -0.065                     | 531.2291  |
| 57   | 7      | 50     | 56    | 8       | 49      | A    | 1           | 329456.145   | -0.052                     | 531.2291  |
| 57   | 8      | 50     | 56    | 7       | 49      | A    | 1           | 329456.145   | -0.071                     | 531.2291  |
| 57   | 8      | 50     | 56    | 8       | 49      | A    | 1           | 329456.145   | -0.058                     | 531.2291  |
| 56   | 8      | 48     | 55    | 9       | 47      | A    | 1           | 329484.453   | 0.279                      | 527.3387  |
| 56   | 9      | 48     | 55    | 8       | 47      | A    | 1           | 329484.453   | -0.361                     | 527.3387  |
| 58   | 6      | 52     | 57    | 6       | 51      | A    | 1           | 329521.401   | -0.093                     | 534.6407  |
| 58   | 6      | 52     | 57    | 7       | 51      | A    | 1           | 329521.401   | -0.093                     | 534.6407  |
| 58   | 7      | 52     | 57    | 6       | 51      | A    | 1           | 329521.401   | -0.094                     | 534.6407  |
| 58   | 7      | 52     | 57    | 7       | 51      | A    | 1           | 329521.401   | -0.093                     | 534.6407  |
| 57   | 7      | 50     | 56    | 7       | 49      | E    | 1           | 329601.910   | -0.044                     | 531.1189  |
| 57   | 7      | 50     | 56    | 8       | 49      | E    | 1           | 329601.910   | -0.027                     | 531.1189  |
| 57   | 8      | 50     | 56    | 7       | 49      | E    | 1           | 329601.910   | -0.052                     | 531.1189  |
| 57   | 8      | 50     | 56    | 8       | 49      | E    | 1           | 329601.910   | -0.036                     | 531.1189  |
| 59   | 5      | 54     | 58    | 5       | 53      | A    | 1           | 329645.684   | -0.158                     | 537.5966  |
| 59   | 5      | 54     | 58    | 6       | 53      | A    | 1           | 329645.684   | -0.158                     | 537.5966  |
| 59   | 6      | 54     | 58    | 5       | 53      | A    | 1           | 329645.684   | -0.158                     | 537.5966  |
| 59   | 6      | 54     | 58    | 6       | 53      | A    | 1           | 329645.684   | -0.158                     | 537.5966  |
| 58   | 6      | 52     | 57    | 6       | 51      | E    | 1           | 329652.180   | -0.020                     | 534.5143  |
| 58   | 6      | 52     | 57    | 7       | 51      | E    | 1           | 329652.180   | -0.020                     | 534.5143  |
| 58   | 7      | 52     | 57    | 6       | 51      | E    | 1           | 329652.180   | -0.020                     | 534.5143  |
| 58   | 7      | 52     | 57    | 7       | 51      | E    | 1           | 329652.180   | -0.020                     | 534.5143  |
| 55   | 9      | 46     | 54    | 10      | 45      | A    | 1           | 329660.208   | 0.059                      | 522.9364  |
| 57   | 7      | 50     | 56    | 7       | 49      | E    | 0           | 329669.564   | -0.039                     | 402.8268  |
| 57   | 8      | 50     | 56    | 8       | 49      | E    | 0           | 329669.564   | -0.032                     | 402.8268  |
| 57   | 7      | 50     | 56    | 7       | 49      | A    | 0           | 329674.093   | -0.025                     | 402.8234  |
| 57   | 7      | 50     | 56    | 8       | 49      | A    | 0           | 329674.093   | -0.010                     | 402.8234  |
| 57   | 8      | 50     | 56    | 7       | 49      | A    | 0           | 329674.093   | -0.032                     | 402.8234  |
| 57   | 8      | 50     | 56    | 8       | 49      | A    | 0           | 329674.093   | -0.018                     | 402.8234  |
| 55   | 10     | 46     | 54    | 9       | 45      | A    | 1           | 329676.276   | 0.142                      | 522.9361  |
| 56   | 8      | 48     | 55    | 8       | 47      | E    | 0           | 329711.789   | -0.131                     | 398.9480  |
| 56   | 9      | 48     | 55    | 9       | 47      | E    | 0           | 329711.789   | 0.086                      | 398.9480  |
| 56   | 8      | 48     | 55    | 8       | 47      | A    | 0           | 329716.816   | -0.147                     | 398.9448  |
| 56   | 8      | 48     | 55    | 9       | 47      | A    | 0           | 329716.816   | 0.323                      | 398.9449  |
| 56   | 9      | 48     | 55    | 8       | 47      | A    | 0           | 329716.816   | -0.399                     | 398.9448  |
| 56   | 9      | 48     | 55    | 9       | 47      | A    | 0           | 329716.816   | 0.071                      | 398.9449  |
| 58   | 6      | 52     | 57    | 6       | 51      | E    | 0           | 329721.624   | -0.025                     | 406.2229  |
| 58   | 7      | 52     | 57    | 7       | 51      | E    | 0           | 329721.624   | -0.024                     | 406.2229  |
| 58   | 6      | 52     | 57    | 6       | 51      | A    | 0           | 329725.679   | -0.010                     | 406.2189  |
| 58   | 6      | 52     | 57    | 7       | 51      | A    | 0           | 329725.679   | -0.010                     | 406.2189  |
| 58   | 7      | 52     | 57    | 6       | 51      | A    | 0           | 329725.679   | -0.011                     | 406.2189  |



| $J'$ | $K'_a$ | $K'_c$ | $J''$ | $K''_a$ | $K''_c$ | Sym. | $v_{tCH_3}$ | $\nu_{Obs.}$ | $\nu_{Obs.} - \nu_{Calc.}$ | $E_{low}$ |
|------|--------|--------|-------|---------|---------|------|-------------|--------------|----------------------------|-----------|
| 58   | 7      | 52     | 57    | 7       | 51      | A    | 0           | 329725.679   | -0.010                     | 406.2189  |
| 59   | 5      | 54     | 58    | 5       | 53      | E    | 1           | 329761.711   | -0.028                     | 537.4484  |
| 59   | 5      | 54     | 58    | 6       | 53      | E    | 1           | 329761.711   | -0.028                     | 537.4484  |
| 59   | 6      | 54     | 58    | 5       | 53      | E    | 1           | 329761.711   | -0.028                     | 537.4484  |
| 59   | 6      | 54     | 58    | 6       | 53      | E    | 1           | 329761.711   | -0.028                     | 537.4484  |
| 60   | 4      | 56     | 59    | 4       | 55      | A    | 1           | 329808.346   | -0.151                     | 540.1139  |
| 60   | 4      | 56     | 59    | 5       | 55      | A    | 1           | 329808.346   | -0.151                     | 540.1139  |
| 60   | 5      | 56     | 59    | 4       | 55      | A    | 1           | 329808.346   | -0.151                     | 540.1139  |
| 60   | 5      | 56     | 59    | 5       | 55      | A    | 1           | 329808.346   | -0.151                     | 540.1139  |
| 52   | 17     | 36     | 51    | 17      | 35      | E    | 0           | 329823.633   | -0.117                     | 397.8619  |
| 64   | 30     | 35     | 64    | 29      | 36      | E    | 0           | 329824.862   | -0.049                     | 656.3159  |
| 59   | 5      | 54     | 58    | 5       | 53      | E    | 0           | 329832.503   | -0.020                     | 409.1593  |
| 59   | 6      | 54     | 58    | 6       | 53      | E    | 0           | 329832.503   | -0.020                     | 409.1593  |
| 59   | 5      | 54     | 58    | 5       | 53      | A    | 0           | 329836.091   | -0.009                     | 409.1546  |
| 59   | 5      | 54     | 58    | 6       | 53      | A    | 0           | 329836.091   | -0.009                     | 409.1546  |
| 59   | 6      | 54     | 58    | 5       | 53      | A    | 0           | 329836.091   | -0.009                     | 409.1546  |
| 59   | 6      | 54     | 58    | 6       | 53      | A    | 0           | 329836.091   | -0.009                     | 409.1546  |
| 55   | 10     | 46     | 54    | 10      | 45      | E    | 1           | 329849.248   | -0.078                     | 522.8419  |
| 55   | 9      | 46     | 54    | 9       | 45      | E    | 1           | 329854.741   | 0.007                      | 522.8415  |
| 55   | 10     | 46     | 54    | 9       | 45      | E    | 1           | 329861.606   | 0.023                      | 522.8415  |
| 52   | 17     | 35     | 51    | 17      | 34      | E    | 0           | 329863.697   | -0.082                     | 397.8742  |
| 64   | 30     | 34     | 64    | 29      | 35      | E    | 0           | 329870.650   | -0.066                     | 656.3175  |
| 52   | 17     | 35     | 51    | 17      | 34      | A    | 0           | 329886.915   | -0.266                     | 397.8722  |
| 55   | 9      | 46     | 54    | 10      | 45      | E    | 0           | 329902.704   | -0.035                     | 394.5534  |
| 55   | 10     | 46     | 54    | 9       | 45      | A    | 0           | 329926.063   | -0.074                     | 394.5500  |
| 23   | 17     | 6      | 22    | 16      | 6       | E    | 0           | 329978.536   | -0.067                     | 168.0149  |
| 60   | 4      | 56     | 59    | 4       | 55      | E    | 0           | 329980.779   | -0.004                     | 411.6527  |
| 60   | 5      | 56     | 59    | 5       | 55      | E    | 0           | 329980.779   | -0.004                     | 411.6527  |
| 60   | 4      | 56     | 59    | 4       | 55      | A    | 0           | 329983.860   | -0.008                     | 411.6472  |
| 60   | 4      | 56     | 59    | 5       | 55      | A    | 0           | 329983.860   | -0.008                     | 411.6472  |
| 60   | 5      | 56     | 59    | 4       | 55      | A    | 0           | 329983.860   | -0.008                     | 411.6472  |
| 60   | 5      | 56     | 59    | 5       | 55      | A    | 0           | 329983.860   | -0.008                     | 411.6472  |
| 23   | 17     | 7      | 22    | 16      | 7       | E    | 0           | 329993.848   | 0.003                      | 168.0017  |
| 61   | 3      | 58     | 60    | 3       | 57      | A    | 1           | 329996.303   | -0.104                     | 542.2058  |
| 61   | 3      | 58     | 60    | 4       | 57      | A    | 1           | 329996.303   | -0.104                     | 542.2058  |
| 61   | 4      | 58     | 60    | 3       | 57      | A    | 1           | 329996.303   | -0.104                     | 542.2058  |
| 61   | 4      | 58     | 60    | 4       | 57      | A    | 1           | 329996.303   | -0.104                     | 542.2058  |
| 23   | 17     | 7      | 22    | 16      | 6       | A    | 0           | 330025.123   | -0.049                     | 168.0114  |
| 23   | 17     | 6      | 22    | 16      | 7       | A    | 0           | 330025.123   | -0.049                     | 168.0114  |
| 61   | 3      | 58     | 60    | 3       | 57      | E    | 1           | 330079.051   | 0.008                      | 541.9960  |
| 61   | 3      | 58     | 60    | 4       | 57      | E    | 1           | 330079.051   | 0.008                      | 541.9960  |
| 61   | 4      | 58     | 60    | 3       | 57      | E    | 1           | 330079.051   | 0.008                      | 541.9960  |
| 61   | 4      | 58     | 60    | 4       | 57      | E    | 1           | 330079.051   | 0.008                      | 541.9960  |
| 54   | 11     | 44     | 53    | 11      | 43      | A    | 1           | 330092.978   | 0.157                      | 517.9737  |
| 52   | 12     | 41     | 51    | 11      | 40      | E    | 0           | 330122.166   | -0.027                     | 372.9997  |
| 53   | 24     | 29     | 52    | 24      | 28      | A    | 0           | 330135.814   | -0.089                     | 461.1096  |
| 53   | 24     | 30     | 52    | 24      | 29      | A    | 0           | 330135.814   | -0.089                     | 461.1096  |
| 52   | 12     | 41     | 51    | 11      | 40      | A    | 0           | 330145.045   | -0.031                     | 372.9957  |
| 61   | 3      | 58     | 60    | 3       | 57      | E    | 0           | 330152.756   | -0.003                     | 413.7160  |
| 61   | 4      | 58     | 60    | 4       | 57      | E    | 0           | 330152.756   | -0.003                     | 413.7160  |
| 61   | 3      | 58     | 60    | 3       | 57      | A    | 0           | 330155.295   | -0.002                     | 413.7095  |
| 61   | 3      | 58     | 60    | 4       | 57      | A    | 0           | 330155.295   | -0.002                     | 413.7095  |
| 61   | 4      | 58     | 60    | 3       | 57      | A    | 0           | 330155.295   | -0.002                     | 413.7095  |
| 61   | 4      | 58     | 60    | 4       | 57      | A    | 0           | 330155.295   | -0.002                     | 413.7095  |
| 54   | 10     | 44     | 53    | 10      | 43      | A    | 1           | 330172.019   | 0.087                      | 517.9674  |
| 54   | 10     | 44     | 53    | 11      | 43      | E    | 1           | 330173.262   | 0.020                      | 517.8777  |
| 62   | 2      | 60     | 61    | 2       | 59      | A    | 1           | 330201.041   | -0.099                     | 543.8828  |
| 62   | 2      | 60     | 61    | 3       | 59      | A    | 1           | 330201.041   | -0.099                     | 543.8828  |
| 62   | 3      | 60     | 61    | 2       | 59      | A    | 1           | 330201.041   | -0.099                     | 543.8828  |
| 62   | 3      | 60     | 61    | 3       | 59      | A    | 1           | 330201.041   | -0.099                     | 543.8828  |
| 54   | 10     | 44     | 53    | 11      | 43      | A    | 0           | 330239.977   | -0.025                     | 389.5910  |
| 62   | 2      | 60     | 61    | 2       | 59      | E    | 1           | 330263.438   | 0.009                      | 543.6317  |
| 62   | 2      | 60     | 61    | 3       | 59      | E    | 1           | 330263.438   | 0.009                      | 543.6317  |
| 62   | 3      | 60     | 61    | 2       | 59      | E    | 1           | 330263.438   | 0.009                      | 543.6317  |
| 62   | 3      | 60     | 61    | 3       | 59      | E    | 1           | 330263.438   | 0.009                      | 543.6317  |
| 63   | 30     | 34     | 63    | 29      | 35      | E    | 0           | 330289.925   | -0.143                     | 643.0231  |
| 54   | 11     | 44     | 53    | 11      | 43      | E    | 1           | 330302.398   | -0.155                     | 517.8777  |
| 63   | 30     | 33     | 63    | 29      | 34      | A    | 0           | 330307.826   | 0.006                      | 643.0347  |
| 63   | 30     | 34     | 63    | 29      | 35      | A    | 0           | 330307.826   | 0.006                      | 643.0347  |
| 63   | 30     | 33     | 63    | 29      | 34      | E    | 0           | 330335.807   | -0.128                     | 643.0248  |
| 62   | 2      | 60     | 61    | 2       | 59      | E    | 0           | 330339.407   | -0.007                     | 415.3592  |
| 62   | 3      | 60     | 61    | 3       | 59      | E    | 0           | 330339.407   | -0.007                     | 415.3592  |
| 62   | 2      | 60     | 61    | 2       | 59      | A    | 0           | 330341.316   | -0.008                     | 415.3513  |
| 62   | 2      | 60     | 61    | 3       | 59      | A    | 0           | 330341.316   | -0.008                     | 415.3513  |
| 62   | 3      | 60     | 61    | 2       | 59      | A    | 0           | 330341.316   | -0.008                     | 415.3513  |
| 62   | 3      | 60     | 61    | 3       | 59      | A    | 0           | 330341.316   | -0.008                     | 415.3513  |
| 33   | 12     | 22     | 32    | 11      | 21      | A    | 0           | 330345.081   | -0.047                     | 199.9810  |
| 54   | 11     | 44     | 53    | 11      | 43      | E    | 0           | 330354.515   | -0.017                     | 389.5940  |
| 54   | 11     | 44     | 53    | 11      | 43      | A    | 0           | 330361.086   | 0.057                      | 389.5910  |
| 63   | 1      | 62     | 62    | 2       | 61      | A    | 1           | 330417.231   | 0.017                      | 545.1535  |
| 63   | 2      | 62     | 62    | 1       | 61      | A    | 1           | 330417.231   | 0.017                      | 545.1535  |
| 54   | 10     | 44     | 53    | 10      | 43      | E    | 0           | 330440.031   | -0.017                     | 389.5872  |
| 54   | 10     | 44     | 53    | 10      | 43      | A    | 0           | 330446.953   | 0.002                      | 389.5841  |
| 63   | 1      | 62     | 62    | 1       | 61      | E    | 1           | 330455.413   | 0.025                      | 544.8530  |
| 63   | 2      | 62     | 62    | 2       | 61      | E    | 1           | 330455.413   | 0.025                      | 544.8530  |
| 33   | 12     | 21     | 32    | 11      | 21      | E    | 0           | 330489.393   | -0.100                     | 199.9874  |
| 54   | 11     | 44     | 53    | 10      | 43      | E    | 1           | 330523.076   | 0.005                      | 517.8703  |
| 63   | 1      | 62     | 62    | 1       | 61      | E    | 0           | 330534.563   | -0.054                     | 416.5900  |
| 63   | 2      | 62     | 62    | 2       | 61      | E    | 0           | 330534.563   | -0.054                     | 416.5900  |
| 63   | 1      | 62     | 62    | 1       | 61      | A    | 0           | 330535.822   | 0.034                      | 416.5807  |
| 63   | 1      | 62     | 62    | 2       | 61      | A    | 0           | 330535.822   | 0.034                      | 416.5807  |
| 63   | 2      | 62     | 62    | 1       | 61      | A    | 0           | 330535.822   | 0.034                      | 416.5807  |
| 63   | 2      | 62     | 62    | 2       | 61      | A    | 0           | 330535.822   | 0.034                      | 416.5807  |
| 54   | 11     | 44     | 53    | 10      | 43      | E    | 0           | 330560.407   | -0.043                     | 389.5872  |
| 54   | 11     | 44     | 53    | 10      | 43      | A    | 0           | 330567.957   | -0.020                     | 389.5841  |
| 64   | 0      | 64     | 63    | 0       | 63      | A    | 1           | 330641.280   | 0.161                      | 546.0250  |
| 64   | 0      | 64     | 63    | 1       | 63      | A    | 1           | 330641.280   | 0.161                      | 546.0250  |
| 64   | 1      | 64     | 63    | 0       | 63      | A    | 1           | 330641.280   | 0.161                      | 546.0250  |
| 64   | 1      | 64     | 63    | 1       | 63      | A    | 1           | 330641.280   | 0.161                      | 546.0250  |
| 64   | 0      | 64     | 63    | 0       | 63      | E    | 1           | 330650.364   | 0.045                      | 545.6658  |
| 64   | 1      | 64     | 63    | 1       | 63      | E    | 1           | 330650.364   | 0.045                      | 545.6658  |
| 53   | 23     | 31     | 52    | 23      | 30      | A    | 0           | 330660.576   | -0.064                     | 452.3586  |
| 53   | 23     | 30     | 52    | 23      | 29      | A    | 0           | 330660.576   | -0.065                     | 452.3586  |
| 53   | 23     | 31     | 52    | 23      | 30      | E    | 0           | 330663.396   | 0.159                      | 452.3457  |
| 52   | 13     | 40     | 51    | 13      | 39      | E    | 0           | 330696.737   | -0.003                     | 377.8424  |
| 52   | 13     | 40     | 51    | 13      | 39      | A    | 0           | 330700.238   | -0.060                     | 377.8392  |
| 33   | 12     | 22     | 32    | 11      | 22      | E    | 0           | 330723.419   | -0.003                     | 199.9665  |
| 64   | 0      | 64     | 63    | 0       | 63      | A    | 0           | 330734.277   | -0.148                     | 417.4038  |
| 64   | 0      | 64     | 63    | 1       | 63      | A    | 0           | 330734.277   | -0.148                     | 417.4038  |
| 64   | 1      | 64     | 63    | 0       | 63      | A    | 0           | 330734.277   | -0.148                     | 417.4038  |
| 64   | 1      | 64     | 63    | 1       | 63      | A    | 0           | 330734.277   | -0.148                     | 417.4038  |
| 64   | 0      | 64     | 63    | 0       | 63      | E    | 0           | 330734.277   | 0.145                      | 417.4150  |
| 64   | 1      | 64     | 63    | 1       | 63      | E    | 0           | 330734.277   | 0.145                      | 417.4150  |
| 62   | 30     | 32     | 62    | 29      | 33      | A    | 0           | 330749.574   | -0.079                     | 629.9565  |
| 62   | 30     | 33     | 62    | 29      | 34      | A    | 0           | 330749.574   | -0.079                     | 629.9565  |
| 25   | 16     | 9      | 24    | 15      | 9       | E    | 0           | 330771.253   | -0.083                     | 171.8138  |



| $J'$ | $K'_a$ | $K'_c$ | $J''$ | $K''_a$ | $K''_c$ | Sym. | $v_{tCH_3}$ | $\nu_{Obs.}$ | $\nu_{Obs.} - \nu_{Calc.}$ | $E_{low}$ |
|------|--------|--------|-------|---------|---------|------|-------------|--------------|----------------------------|-----------|
| 25   | 16     | 10     | 24    | 15      | 10      | E    | 0           | 330781.043   | -0.020                     | 171.8003  |
| 25   | 16     | 9      | 24    | 15      | 10      | A    | 0           | 330816.426   | -0.038                     | 171.8088  |
| 25   | 16     | 10     | 24    | 15      | 9       | A    | 0           | 330816.426   | -0.038                     | 171.8088  |
| 33   | 12     | 21     | 32    | 11      | 22      | A    | 0           | 330951.449   | -0.042                     | 199.9640  |
| 53   | 12     | 42     | 52    | 12      | 41      | E    | 0           | 330996.474   | -0.034                     | 384.0114  |
| 53   | 12     | 42     | 52    | 12      | 41      | A    | 0           | 331003.202   | -0.023                     | 384.0082  |
| 61   | 30     | 32     | 61    | 29      | 33      | E    | 0           | 331152.204   | -0.121                     | 617.0806  |
| 61   | 30     | 31     | 61    | 29      | 32      | A    | 0           | 331169.353   | -0.090                     | 617.0924  |
| 61   | 30     | 32     | 61    | 29      | 33      | A    | 0           | 331169.353   | -0.090                     | 617.0924  |
| 53   | 22     | 31     | 52    | 22      | 30      | A    | 0           | 331267.702   | -0.076                     | 444.0201  |
| 53   | 22     | 32     | 52    | 22      | 31      | A    | 0           | 331267.702   | -0.076                     | 444.0201  |
| 53   | 22     | 32     | 52    | 22      | 31      | E    | 0           | 331270.891   | -0.050                     | 444.0075  |
| 27   | 15     | 12     | 26    | 14      | 12      | E    | 0           | 331448.187   | -0.058                     | 176.8680  |
| 27   | 15     | 13     | 26    | 14      | 13      | E    | 0           | 331452.141   | 0.021                      | 176.8544  |
| 27   | 15     | 13     | 26    | 14      | 12      | A    | 0           | 331491.193   | -0.076                     | 176.8615  |
| 27   | 15     | 12     | 26    | 14      | 13      | A    | 0           | 331491.193   | -0.076                     | 176.8615  |
| 52   | 16     | 37     | 51    | 16      | 36      | A    | 0           | 331526.374   | 0.038                      | 392.2182  |
| 52   | 16     | 37     | 51    | 16      | 36      | E    | 0           | 331545.597   | -0.065                     | 392.2167  |
| 60   | 30     | 31     | 60    | 29      | 32      | E    | 0           | 331551.119   | -0.152                     | 604.4302  |
| 60   | 30     | 30     | 60    | 29      | 31      | A    | 0           | 331568.082   | -0.011                     | 604.4421  |
| 60   | 30     | 31     | 60    | 29      | 32      | A    | 0           | 331568.082   | -0.011                     | 604.4421  |
| 60   | 30     | 30     | 60    | 29      | 31      | E    | 0           | 331597.255   | -0.031                     | 604.4321  |
| 33   | 9      | 24     | 32    | 8       | 25      | E    | 0           | 331656.414   | 0.023                      | 189.9138  |
| 31   | 13     | 19     | 30    | 12      | 19      | E    | 0           | 331812.429   | -0.030                     | 190.8686  |
| 31   | 13     | 18     | 30    | 12      | 18      | E    | 0           | 331821.852   | -0.104                     | 190.8816  |
| 31   | 13     | 19     | 30    | 12      | 18      | A    | 0           | 331852.682   | -0.110                     | 190.8725  |
| 31   | 13     | 18     | 30    | 12      | 19      | A    | 0           | 331864.655   | -0.035                     | 190.8721  |
| 29   | 14     | 16     | 28    | 13      | 16      | E    | 0           | 331882.708   | -0.131                     | 183.1939  |
| 29   | 14     | 15     | 28    | 13      | 15      | E    | 0           | 331885.169   | -0.111                     | 183.2073  |
| 29   | 14     | 16     | 28    | 13      | 15      | A    | 0           | 331925.474   | 0.012                      | 183.1994  |
| 59   | 30     | 30     | 59    | 29      | 31      | E    | 0           | 331929.823   | -0.105                     | 591.9932  |
| 59   | 30     | 29     | 59    | 29      | 30      | A    | 0           | 331946.430   | -0.036                     | 592.0052  |
| 59   | 30     | 30     | 59    | 29      | 31      | A    | 0           | 331946.430   | -0.036                     | 592.0052  |
| 59   | 30     | 29     | 59    | 29      | 30      | E    | 0           | 331975.921   | -0.060                     | 591.9952  |
| 53   | 21     | 33     | 52    | 21      | 32      | A    | 0           | 331978.495   | -0.034                     | 436.1011  |
| 53   | 21     | 32     | 52    | 21      | 31      | E    | 0           | 331982.163   | 0.107                      | 436.0981  |
| 53   | 11     | 42     | 52    | 11      | 41      | E    | 0           | 331998.662   | -0.058                     | 383.9224  |
| 52   | 16     | 36     | 51    | 16      | 35      | E    | 0           | 332226.545   | -0.032                     | 392.2515  |
| 58   | 30     | 29     | 58    | 29      | 30      | E    | 0           | 332288.991   | -0.133                     | 579.7694  |
| 58   | 30     | 28     | 58    | 29      | 29      | A    | 0           | 332305.314   | -0.077                     | 579.7815  |
| 58   | 30     | 29     | 58    | 29      | 30      | A    | 0           | 332305.314   | -0.077                     | 579.7815  |
| 58   | 30     | 28     | 58    | 29      | 29      | E    | 0           | 332335.010   | -0.201                     | 579.7714  |
| 50   | 13     | 37     | 49    | 13      | 36      | A    | 0           | 332376.112   | -0.087                     | 357.8821  |
| 50   | 13     | 37     | 49    | 13      | 36      | E    | 0           | 332381.906   | -0.063                     | 357.8881  |
| 57   | 30     | 28     | 57    | 29      | 29      | E    | 0           | 332629.576   | -0.080                     | 567.7584  |
| 57   | 30     | 27     | 57    | 29      | 28      | A    | 0           | 332645.593   | -0.072                     | 567.7705  |
| 57   | 30     | 28     | 57    | 29      | 29      | A    | 0           | 332645.593   | -0.072                     | 567.7705  |
| 57   | 30     | 27     | 57    | 29      | 28      | E    | 0           | 332675.682   | -0.090                     | 567.7604  |
| 53   | 20     | 34     | 52    | 20      | 33      | A    | 0           | 332822.771   | 0.045                      | 428.6110  |
| 56   | 30     | 27     | 56    | 29      | 28      | E    | 0           | 332952.180   | -0.108                     | 555.9599  |
| 56   | 30     | 26     | 56    | 29      | 27      | A    | 0           | 332967.990   | -0.061                     | 555.9721  |
| 56   | 30     | 27     | 56    | 29      | 28      | A    | 0           | 332967.990   | -0.061                     | 555.9721  |
| 56   | 30     | 26     | 56    | 29      | 27      | E    | 0           | 332998.347   | -0.082                     | 555.9620  |
| 51   | 12     | 39     | 50    | 12      | 38      | E    | 0           | 333006.771   | -0.034                     | 366.0307  |
| 35   | 11     | 24     | 34    | 10      | 25      | E    | 0           | 333011.445   | -0.081                     | 210.5414  |
| 51   | 12     | 39     | 50    | 12      | 38      | A    | 0           | 333023.157   | 0.026                      | 366.0249  |
| 35   | 11     | 24     | 34    | 10      | 25      | A    | 0           | 333027.655   | -0.041                     | 210.5355  |
| 52   | 15     | 38     | 51    | 15      | 37      | A    | 0           | 333099.072   | -0.055                     | 387.0820  |
| 52   | 15     | 38     | 51    | 15      | 37      | E    | 0           | 333106.439   | -0.053                     | 387.0830  |
| 52   | 14     | 39     | 51    | 14      | 38      | A    | 0           | 333227.011   | -0.060                     | 382.3751  |
| 52   | 14     | 39     | 51    | 14      | 38      | E    | 0           | 333228.864   | -0.058                     | 382.3775  |
| 55   | 30     | 25     | 55    | 29      | 26      | A    | 0           | 333273.245   | -0.039                     | 544.3859  |
| 55   | 30     | 26     | 55    | 29      | 27      | A    | 0           | 333273.245   | -0.039                     | 544.3859  |
| 55   | 30     | 25     | 55    | 29      | 26      | E    | 0           | 333303.857   | -0.059                     | 544.3757  |
| 54   | 30     | 25     | 54    | 29      | 26      | E    | 0           | 333546.720   | -0.044                     | 532.9992  |
| 54   | 30     | 24     | 54    | 29      | 25      | A    | 0           | 333562.036   | -0.036                     | 533.0116  |
| 54   | 30     | 25     | 54    | 29      | 26      | A    | 0           | 333562.036   | -0.036                     | 533.0116  |
| 54   | 30     | 24     | 54    | 29      | 25      | E    | 0           | 333592.878   | -0.065                     | 533.0014  |
| 53   | 12     | 42     | 52    | 11      | 41      | E    | 0           | 333665.506   | -0.060                     | 383.9224  |
| 53   | 12     | 42     | 52    | 11      | 41      | A    | 0           | 333683.236   | -0.054                     | 383.9188  |
| 53   | 30     | 24     | 53    | 29      | 25      | E    | 0           | 333819.892   | -0.107                     | 521.8365  |
| 53   | 30     | 23     | 53    | 29      | 24      | A    | 0           | 333835.052   | -0.042                     | 521.8489  |
| 53   | 30     | 24     | 53    | 29      | 25      | A    | 0           | 333835.052   | -0.042                     | 521.8489  |
| 53   | 19     | 35     | 52    | 19      | 34      | A    | 0           | 333843.765   | -0.085                     | 421.5624  |
| 53   | 19     | 34     | 52    | 19      | 33      | A    | 0           | 333845.898   | -0.060                     | 421.5625  |
| 53   | 19     | 34     | 52    | 19      | 33      | E    | 0           | 333848.954   | -0.001                     | 421.5628  |
| 53   | 19     | 35     | 52    | 19      | 34      | E    | 0           | 333850.478   | -0.058                     | 421.5520  |
| 53   | 30     | 23     | 53    | 29      | 24      | E    | 0           | 333866.097   | -0.095                     | 521.8387  |
| 54   | 32     | 22     | 53    | 32      | 21      | A    | 0           | 333903.646   | -0.093                     | 556.4297  |
| 54   | 32     | 23     | 53    | 32      | 22      | A    | 0           | 333903.646   | -0.093                     | 556.4297  |
| 54   | 32     | 22     | 53    | 32      | 21      | E    | 0           | 333903.646   | -0.027                     | 556.4231  |
| 52   | 30     | 23     | 52    | 29      | 24      | E    | 0           | 334078.020   | -0.095                     | 510.8851  |
| 52   | 30     | 22     | 52    | 29      | 23      | A    | 0           | 334092.962   | -0.048                     | 510.8975  |
| 52   | 30     | 23     | 52    | 29      | 24      | A    | 0           | 334092.962   | -0.048                     | 510.8975  |
| 52   | 30     | 22     | 52    | 29      | 23      | E    | 0           | 334124.281   | -0.038                     | 510.8873  |
| 54   | 31     | 24     | 53    | 31      | 23      | A    | 0           | 334128.725   | -0.028                     | 544.5118  |
| 54   | 31     | 23     | 53    | 31      | 22      | A    | 0           | 334128.725   | -0.028                     | 544.5118  |
| 54   | 31     | 23     | 53    | 31      | 22      | E    | 0           | 334128.725   | -0.128                     | 544.5039  |
| 54   | 31     | 24     | 53    | 31      | 23      | E    | 0           | 334130.123   | -0.018                     | 544.4986  |
| 51   | 30     | 22     | 51    | 29      | 23      | E    | 0           | 334321.686   | -0.062                     | 500.1448  |
| 51   | 30     | 21     | 51    | 29      | 22      | A    | 0           | 334336.403   | -0.049                     | 500.1573  |
| 51   | 30     | 22     | 51    | 29      | 23      | A    | 0           | 334336.403   | -0.049                     | 500.1573  |
| 51   | 30     | 21     | 51    | 29      | 22      | E    | 0           | 334367.932   | -0.028                     | 500.1471  |
| 54   | 30     | 24     | 53    | 30      | 23      | A    | 0           | 334376.097   | 0.040                      | 532.9844  |
| 54   | 30     | 25     | 53    | 30      | 24      | A    | 0           | 334376.097   | 0.040                      | 532.9844  |
| 54   | 30     | 24     | 53    | 30      | 23      | E    | 0           | 334376.097   | -0.254                     | 532.9753  |
| 20   | 19     | 1      | 19    | 18      | 1       | E    | 0           | 334414.209   | -0.059                     | 168.0127  |
| 20   | 19     | 2      | 19    | 18      | 2       | E    | 0           | 334439.545   | -0.007                     | 168.0006  |
| 20   | 19     | 2      | 19    | 18      | 1       | A    | 0           | 334461.661   | -0.070                     | 168.0124  |
| 20   | 19     | 1      | 19    | 18      | 2       | A    | 0           | 334461.661   | -0.070                     | 168.0124  |
| 50   | 30     | 21     | 50    | 29      | 22      | E    | 0           | 334551.535   | 0.027                      | 489.6153  |
| 58   | 7      | 51     | 57    | 7       | 50      | A    | 1           | 334563.651   | -0.046                     | 542.2186  |
| 58   | 7      | 51     | 57    | 8       | 50      | A    | 1           | 334563.651   | -0.040                     | 542.2186  |
| 58   | 8      | 51     | 57    | 7       | 50      | A    | 1           | 334563.651   | -0.050                     | 542.2186  |
| 58   | 8      | 51     | 57    | 8       | 50      | A    | 1           | 334563.651   | -0.043                     | 542.2186  |
| 50   | 30     | 20     | 50    | 29      | 21      | A    | 0           | 334565.972   | -0.059                     | 489.6278  |
| 50   | 30     | 21     | 50    | 29      | 22      | A    | 0           | 334565.972   | -0.059                     | 489.6278  |
| 57   | 8      | 49     | 56    | 8       | 48      | A    | 1           | 334577.960   | -0.055                     | 538.3291  |
| 57   | 8      | 49     | 56    | 9       | 48      | A    | 1           | 334577.960   | 0.168                      | 538.3291  |
| 57   | 9      | 49     | 56    | 8       | 48      | A    | 1           | 334577.960   | -0.173                     | 538.3291  |
| 57   | 9      | 49     | 56    | 9       | 48      | A    | 1           | 334577.960   | 0.050                      | 538.3291  |
| 50   | 30     | 20     | 50    | 29      | 21      | E    | 0           | 334597.724   | -0.001                     | 489.6176  |
| 45   | 12     | 34     | 44    | 11      | 33      | E    | 0           | 334622.502   | -0.091                     | 300.4739  |
| 59   | 6      | 53     | 58    | 6       | 52      | A    | 1           | 334636.458   | -0.107                     | 545.6324  |
| 59   | 6      | 53     | 58    | 7       | 52      | A    | 1           | 334636.458   | -0.107                     | 545.6324  |
| 59   | 7      | 53     | 58    | 6       | 52      | A    | 1           | 334636.458   | -0.107                     | 545.6324  |



| $J'$ | $K'_a$ | $K'_c$ | $J''$ | $K''_a$ | $K''_c$ | Sym. | $v_{tCH_3}$ | $\nu_{Obs.}$ | $\nu_{Obs.} - \nu_{Calc.}$ | $E_{low}$ |
|------|--------|--------|-------|---------|---------|------|-------------|--------------|----------------------------|-----------|
| 59   | 7      | 53     | 58    | 7       | 52      | A    | 1           | 334636.458   | -0.107                     | 545.6324  |
| 54   | 29     | 26     | 53    | 29      | 25      | A    | 0           | 334649.040   | -0.040                     | 521.8489  |
| 54   | 29     | 25     | 53    | 29      | 24      | A    | 0           | 334649.040   | -0.040                     | 521.8489  |
| 54   | 29     | 25     | 53    | 29      | 24      | E    | 0           | 334649.040   | -0.560                     | 521.8387  |
| 54   | 29     | 26     | 53    | 29      | 25      | E    | 0           | 334650.889   | 0.006                      | 521.8365  |
| 58   | 7      | 51     | 57    | 7       | 50      | E    | 1           | 334707.444   | -0.033                     | 542.1132  |
| 58   | 7      | 51     | 57    | 8       | 50      | E    | 1           | 334707.444   | -0.025                     | 542.1132  |
| 58   | 8      | 51     | 57    | 7       | 50      | E    | 1           | 334707.444   | -0.038                     | 542.1132  |
| 58   | 8      | 51     | 57    | 8       | 50      | E    | 1           | 334707.444   | -0.029                     | 542.1132  |
| 54   | 12     | 42     | 53    | 13      | 41      | A    | 0           | 334710.428   | -0.076                     | 400.0826  |
| 56   | 9      | 47     | 55    | 10      | 46      | A    | 1           | 334730.240   | 0.000                      | 533.9329  |
| 60   | 5      | 55     | 59    | 5       | 54      | A    | 1           | 334764.834   | -0.212                     | 548.5924  |
| 60   | 5      | 55     | 59    | 6       | 54      | A    | 1           | 334764.834   | -0.212                     | 548.5924  |
| 60   | 6      | 55     | 59    | 5       | 54      | A    | 1           | 334764.834   | -0.212                     | 548.5924  |
| 60   | 6      | 55     | 59    | 6       | 54      | A    | 1           | 334764.834   | -0.212                     | 548.5924  |
| 59   | 6      | 53     | 58    | 6       | 52      | E    | 1           | 334765.996   | 0.099                      | 545.5103  |
| 59   | 6      | 53     | 58    | 7       | 52      | E    | 1           | 334765.996   | 0.099                      | 545.5103  |
| 59   | 7      | 53     | 58    | 6       | 52      | E    | 1           | 334765.996   | 0.099                      | 545.5103  |
| 59   | 7      | 53     | 58    | 7       | 52      | E    | 1           | 334765.996   | 0.099                      | 545.5103  |
| 49   | 30     | 20     | 49    | 29      | 21      | E    | 0           | 334767.958   | -0.029                     | 479.2963  |
| 58   | 7      | 51     | 57    | 7       | 50      | E    | 0           | 334777.500   | -0.049                     | 413.8234  |
| 58   | 8      | 51     | 57    | 8       | 50      | E    | 0           | 334777.500   | -0.045                     | 413.8234  |
| 58   | 7      | 51     | 57    | 7       | 50      | A    | 0           | 334782.021   | 0.018                      | 413.8201  |
| 58   | 7      | 51     | 57    | 8       | 50      | A    | 0           | 334782.021   | 0.025                      | 413.8201  |
| 58   | 8      | 51     | 57    | 7       | 50      | A    | 0           | 334782.021   | 0.014                      | 413.8201  |
| 58   | 8      | 51     | 57    | 8       | 50      | A    | 0           | 334782.021   | 0.021                      | 413.8201  |
| 57   | 8      | 49     | 56    | 8       | 48      | E    | 0           | 334805.214   | -0.095                     | 409.9460  |
| 57   | 9      | 49     | 56    | 9       | 48      | E    | 0           | 334805.214   | 0.022                      | 409.9460  |
| 57   | 8      | 49     | 56    | 8       | 48      | A    | 0           | 334810.187   | -0.077                     | 409.9430  |
| 57   | 8      | 49     | 56    | 9       | 48      | A    | 0           | 334810.187   | 0.175                      | 409.9430  |
| 57   | 9      | 49     | 56    | 8       | 48      | A    | 0           | 334810.187   | -0.212                     | 409.9430  |
| 57   | 9      | 49     | 56    | 9       | 48      | A    | 0           | 334810.187   | 0.040                      | 409.9430  |
| 49   | 30     | 19     | 49    | 29      | 20      | E    | 0           | 334814.179   | -0.027                     | 479.2987  |
| 59   | 6      | 53     | 58    | 6       | 52      | E    | 0           | 334837.480   | -0.026                     | 417.2212  |
| 59   | 7      | 53     | 58    | 7       | 52      | E    | 0           | 334837.480   | -0.026                     | 417.2212  |
| 59   | 6      | 53     | 58    | 6       | 52      | A    | 0           | 334841.494   | -0.012                     | 417.2174  |
| 59   | 6      | 53     | 58    | 7       | 52      | A    | 0           | 334841.494   | -0.012                     | 417.2174  |
| 59   | 7      | 53     | 58    | 6       | 52      | A    | 0           | 334841.494   | -0.012                     | 417.2174  |
| 59   | 7      | 53     | 58    | 7       | 52      | A    | 0           | 334841.494   | -0.012                     | 417.2174  |
| 60   | 5      | 55     | 59    | 5       | 54      | E    | 1           | 334879.977   | -0.033                     | 548.4481  |
| 60   | 5      | 55     | 59    | 6       | 54      | E    | 1           | 334879.977   | -0.033                     | 548.4481  |
| 60   | 6      | 55     | 59    | 5       | 54      | E    | 1           | 334879.977   | -0.033                     | 548.4481  |
| 60   | 6      | 55     | 59    | 6       | 54      | E    | 1           | 334879.977   | -0.033                     | 548.4481  |
| 56   | 9      | 47     | 55    | 10      | 46      | E    | 1           | 334908.979   | -0.002                     | 533.8445  |
| 56   | 9      | 47     | 55    | 9       | 46      | E    | 1           | 334915.805   | -0.025                     | 533.8443  |
| 56   | 10     | 47     | 55    | 9       | 46      | E    | 1           | 334919.623   | -0.009                     | 533.8443  |
| 61   | 4      | 57     | 60    | 4       | 56      | A    | 1           | 334929.758   | -0.169                     | 551.1151  |
| 61   | 4      | 57     | 60    | 5       | 56      | A    | 1           | 334929.758   | -0.169                     | 551.1151  |
| 61   | 5      | 57     | 60    | 4       | 56      | A    | 1           | 334929.758   | -0.169                     | 551.1151  |
| 61   | 5      | 57     | 60    | 5       | 56      | A    | 1           | 334929.758   | -0.169                     | 551.1151  |
| 60   | 5      | 55     | 59    | 5       | 54      | E    | 0           | 334952.735   | -0.016                     | 420.1613  |
| 60   | 6      | 55     | 59    | 6       | 54      | E    | 0           | 334952.735   | -0.016                     | 420.1613  |
| 60   | 5      | 55     | 59    | 5       | 54      | A    | 0           | 334956.274   | -0.025                     | 420.1567  |
| 60   | 5      | 55     | 59    | 6       | 54      | A    | 0           | 334956.274   | -0.025                     | 420.1567  |
| 60   | 6      | 55     | 59    | 5       | 54      | A    | 0           | 334956.274   | -0.025                     | 420.1567  |
| 60   | 6      | 55     | 59    | 6       | 54      | A    | 0           | 334956.274   | -0.025                     | 420.1567  |
| 48   | 30     | 18     | 48    | 29      | 19      | A    | 0           | 334985.893   | -0.052                     | 469.2003  |
| 48   | 30     | 19     | 48    | 29      | 20      | A    | 0           | 334985.893   | -0.052                     | 469.2003  |
| 56   | 10     | 47     | 55    | 9       | 46      | A    | 0           | 334987.746   | -0.019                     | 405.5550  |
| 54   | 11     | 43     | 53    | 12      | 42      | E    | 0           | 335009.613   | 0.021                      | 395.0523  |
| 54   | 11     | 43     | 53    | 12      | 42      | A    | 0           | 335011.788   | -0.006                     | 395.0493  |
| 48   | 30     | 18     | 48    | 29      | 19      | E    | 0           | 335017.999   | 0.024                      | 469.1901  |
| 55   | 10     | 45     | 54    | 11      | 44      | A    | 1           | 335055.209   | 0.225                      | 528.9844  |
| 61   | 4      | 57     | 60    | 4       | 56      | E    | 0           | 335103.395   | -0.009                     | 422.6597  |
| 61   | 5      | 57     | 60    | 5       | 56      | E    | 0           | 335103.395   | -0.009                     | 422.6597  |
| 61   | 4      | 57     | 60    | 4       | 56      | A    | 0           | 335106.477   | 0.007                      | 422.6543  |
| 61   | 4      | 57     | 60    | 5       | 56      | A    | 0           | 335106.477   | 0.007                      | 422.6543  |
| 61   | 5      | 57     | 60    | 4       | 56      | A    | 0           | 335106.477   | 0.007                      | 422.6543  |
| 61   | 5      | 57     | 60    | 5       | 56      | A    | 0           | 335106.477   | 0.007                      | 422.6543  |
| 62   | 3      | 59     | 61    | 3       | 58      | A    | 1           | 335118.913   | -0.092                     | 553.2133  |
| 62   | 3      | 59     | 61    | 4       | 58      | A    | 1           | 335118.913   | -0.092                     | 553.2133  |
| 62   | 4      | 59     | 61    | 3       | 58      | A    | 1           | 335118.913   | -0.092                     | 553.2133  |
| 62   | 4      | 59     | 61    | 4       | 58      | A    | 1           | 335118.913   | -0.092                     | 553.2133  |
| 47   | 30     | 18     | 47    | 29      | 19      | E    | 0           | 335163.309   | -0.057                     | 459.2891  |
| 55   | 10     | 45     | 54    | 10      | 44      | A    | 1           | 335165.668   | 0.102                      | 528.9807  |
| 47   | 30     | 17     | 47    | 29      | 18      | A    | 0           | 335177.372   | -0.032                     | 459.3018  |
| 47   | 30     | 18     | 47    | 29      | 19      | A    | 0           | 335177.372   | -0.032                     | 459.3018  |
| 62   | 3      | 59     | 61    | 3       | 58      | E    | 1           | 335201.383   | 0.086                      | 553.0062  |
| 62   | 3      | 59     | 61    | 4       | 58      | E    | 1           | 335201.383   | 0.086                      | 553.0062  |
| 62   | 4      | 59     | 61    | 3       | 58      | E    | 1           | 335201.383   | 0.086                      | 553.0062  |
| 62   | 4      | 59     | 61    | 4       | 58      | E    | 1           | 335201.383   | 0.086                      | 553.0062  |
| 47   | 30     | 17     | 47    | 29      | 18      | E    | 0           | 335209.632   | 0.049                      | 459.2915  |
| 55   | 10     | 45     | 54    | 11      | 44      | E    | 1           | 335248.555   | 0.045                      | 528.8954  |
| 22   | 18     | 4      | 21    | 17      | 4       | E    | 0           | 335275.151   | -0.137                     | 169.7677  |
| 62   | 3      | 59     | 61    | 4       | 58      | E    | 0           | 335276.714   | 0.057                      | 424.7288  |
| 62   | 4      | 59     | 61    | 3       | 58      | E    | 0           | 335276.714   | 0.057                      | 424.7288  |
| 62   | 3      | 59     | 61    | 3       | 58      | A    | 0           | 335279.203   | 0.018                      | 424.7223  |
| 62   | 3      | 59     | 61    | 4       | 58      | A    | 0           | 335279.203   | 0.018                      | 424.7223  |
| 62   | 4      | 59     | 61    | 3       | 58      | A    | 0           | 335279.203   | 0.018                      | 424.7223  |
| 62   | 4      | 59     | 61    | 4       | 58      | A    | 0           | 335279.203   | 0.018                      | 424.7223  |
| 22   | 18     | 5      | 21    | 17      | 5       | E    | 0           | 335295.731   | 0.038                      | 169.7550  |
| 55   | 10     | 45     | 54    | 11      | 44      | E    | 0           | 335309.518   | -0.066                     | 400.6135  |
| 55   | 10     | 45     | 54    | 11      | 44      | A    | 0           | 335315.554   | -0.007                     | 400.6107  |
| 22   | 18     | 4      | 21    | 17      | 5       | A    | 0           | 335322.605   | -0.020                     | 169.7658  |
| 22   | 18     | 5      | 21    | 17      | 4       | A    | 0           | 335322.605   | -0.020                     | 169.7658  |
| 63   | 2      | 61     | 62    | 2       | 60      | A    | 1           | 335324.171   | -0.171                     | 554.8971  |
| 63   | 2      | 61     | 62    | 3       | 60      | A    | 1           | 335324.171   | -0.171                     | 554.8971  |
| 63   | 3      | 61     | 62    | 2       | 60      | A    | 1           | 335324.171   | -0.171                     | 554.8971  |
| 63   | 3      | 61     | 62    | 3       | 60      | A    | 1           | 335324.171   | -0.171                     | 554.8971  |
| 46   | 30     | 16     | 46    | 29      | 17      | A    | 0           | 335357.252   | 0.007                      | 449.6131  |
| 46   | 30     | 17     | 46    | 29      | 18      | A    | 0           | 335357.252   | 0.007                      | 449.6131  |
| 55   | 11     | 45     | 54    | 11      | 44      | E    | 0           | 335379.427   | 0.079                      | 400.6135  |
| 51   | 14     | 37     | 50    | 14      | 36      | A    | 0           | 335384.204   | -0.222                     | 372.1263  |
| 63   | 2      | 61     | 62    | 2       | 60      | E    | 1           | 335386.474   | 0.012                      | 554.6481  |
| 63   | 2      | 61     | 62    | 3       | 60      | E    | 1           | 335386.474   | 0.012                      | 554.6481  |
| 63   | 3      | 61     | 62    | 2       | 60      | E    | 1           | 335386.474   | 0.012                      | 554.6481  |
| 63   | 3      | 61     | 62    | 3       | 60      | E    | 1           | 335386.474   | 0.012                      | 554.6481  |
| 46   | 30     | 16     | 46    | 29      | 17      | E    | 0           | 335389.493   | -0.072                     | 449.6028  |
| 51   | 14     | 37     | 50    | 14      | 36      | E    | 0           | 335400.529   | -0.010                     | 372.1303  |
| 55   | 10     | 45     | 54    | 10      | 44      | E    | 0           | 335430.136   | 0.150                      | 400.6095  |
| 55   | 10     | 45     | 54    | 10      | 44      | A    | 0           | 335436.609   | 0.021                      | 400.6066  |
| 34   | 12     | 23     | 33    | 11      | 22      | A    | 0           | 335462.459   | -0.193                     | 206.9641  |
| 63   | 2      | 61     | 62    | 2       | 60      | E    | 0           | 335464.077   | 0.108                      | 426.3781  |
| 63   | 3      | 61     | 62    | 3       | 60      | E    | 0           | 335464.077   | 0.108                      | 426.3781  |
| 63   | 2      | 61     | 62    | 2       | 60      | A    | 0           | 335465.879   | 0.005                      | 426.3703  |
| 63   | 2      | 61     | 62    | 3       | 60      | A    | 0           | 335465.879   | 0.005                      | 426.3703  |



| $J'$ | $K'_a$ | $K'_c$ | $J''$ | $K''_a$ | $K''_c$ | Sym. | $v_{tCH_3}$ | $\nu_{Obs.}$ | $\nu_{Obs.} - \nu_{Calc.}$ | $E_{low}$ |
|------|--------|--------|-------|---------|---------|------|-------------|--------------|----------------------------|-----------|
| 63   | 3      | 61     | 62    | 2       | 60      | A    | 0           | 335465.879   | 0.005                      | 426.3703  |
| 63   | 3      | 61     | 62    | 3       | 60      | A    | 0           | 335465.879   | 0.005                      | 426.3703  |
| 55   | 11     | 45     | 54    | 10      | 44      | E    | 0           | 335499.769   | 0.020                      | 400.6095  |
| 55   | 11     | 45     | 54    | 10      | 44      | A    | 0           | 335506.715   | -0.011                     | 400.6066  |
| 45   | 30     | 16     | 45    | 29      | 17      | E    | 0           | 335512.172   | -0.061                     | 440.1212  |
| 45   | 30     | 15     | 45    | 29      | 16      | A    | 0           | 335526.014   | 0.024                      | 440.1339  |
| 45   | 30     | 16     | 45    | 29      | 17      | A    | 0           | 335526.014   | 0.024                      | 440.1339  |
| 64   | 1      | 63     | 63    | 2       | 62      | A    | 1           | 335540.805   | 0.051                      | 556.1750  |
| 64   | 2      | 63     | 63    | 1       | 62      | A    | 1           | 335540.805   | 0.051                      | 556.1750  |
| 64   | 1      | 63     | 63    | 1       | 62      | E    | 1           | 335579.036   | 0.186                      | 555.8758  |
| 64   | 2      | 63     | 63    | 2       | 62      | E    | 1           | 335579.036   | 0.186                      | 555.8758  |
| 64   | 1      | 63     | 63    | 1       | 62      | E    | 0           | 335659.373   | -0.130                     | 427.6155  |
| 64   | 2      | 63     | 63    | 2       | 62      | E    | 0           | 335659.373   | -0.130                     | 427.6155  |
| 64   | 1      | 63     | 63    | 1       | 62      | A    | 0           | 335660.862   | 0.190                      | 427.6062  |
| 64   | 1      | 63     | 63    | 2       | 62      | A    | 0           | 335660.862   | 0.190                      | 427.6062  |
| 64   | 2      | 63     | 63    | 1       | 62      | A    | 0           | 335660.862   | 0.190                      | 427.6062  |
| 64   | 2      | 63     | 63    | 2       | 62      | A    | 0           | 335660.862   | 0.190                      | 427.6062  |
| 44   | 30     | 14     | 44    | 29      | 15      | A    | 0           | 335684.095   | -0.039                     | 430.8642  |
| 44   | 30     | 15     | 44    | 29      | 16      | A    | 0           | 335684.095   | -0.039                     | 430.8642  |
| 34   | 12     | 22     | 33    | 11      | 22      | E    | 0           | 335692.783   | -0.106                     | 206.9698  |
| 44   | 30     | 14     | 44    | 29      | 15      | E    | 0           | 335716.738   | 0.033                      | 430.8539  |
| 65   | 0      | 65     | 64    | 0       | 64      | A    | 1           | 335765.090   | 0.173                      | 557.0540  |
| 65   | 0      | 65     | 64    | 1       | 64      | A    | 1           | 335765.090   | 0.173                      | 557.0540  |
| 65   | 1      | 65     | 64    | 0       | 64      | A    | 1           | 335765.090   | 0.173                      | 557.0540  |
| 65   | 1      | 65     | 64    | 1       | 64      | A    | 1           | 335765.090   | 0.173                      | 557.0540  |
| 65   | 0      | 65     | 64    | 0       | 64      | E    | 1           | 335774.111   | 0.077                      | 556.6951  |
| 65   | 1      | 65     | 64    | 1       | 64      | E    | 1           | 335774.111   | 0.077                      | 556.6951  |
| 43   | 30     | 14     | 43    | 29      | 15      | E    | 0           | 335818.758   | 0.100                      | 421.7907  |
| 43   | 30     | 13     | 43    | 29      | 14      | A    | 0           | 335832.197   | 0.034                      | 421.8036  |
| 43   | 30     | 14     | 43    | 29      | 15      | A    | 0           | 335832.197   | 0.034                      | 421.8036  |
| 65   | 0      | 65     | 64    | 0       | 64      | A    | 0           | 335859.367   | -0.124                     | 428.4360  |
| 65   | 0      | 65     | 64    | 1       | 64      | A    | 0           | 335859.367   | -0.124                     | 428.4360  |
| 65   | 1      | 65     | 64    | 0       | 64      | A    | 0           | 335859.367   | -0.124                     | 428.4360  |
| 65   | 1      | 65     | 64    | 1       | 64      | A    | 0           | 335859.367   | -0.124                     | 428.4360  |
| 65   | 0      | 65     | 64    | 0       | 64      | E    | 0           | 335859.367   | 0.167                      | 428.4471  |
| 65   | 1      | 65     | 64    | 1       | 64      | E    | 0           | 335859.367   | 0.167                      | 428.4471  |
| 43   | 30     | 13     | 43    | 29      | 14      | E    | 0           | 335864.859   | 0.013                      | 421.7933  |
| 42   | 30     | 13     | 42    | 29      | 14      | E    | 0           | 335957.110   | -0.045                     | 412.9390  |
| 42   | 30     | 12     | 42    | 29      | 13      | A    | 0           | 335970.493   | -0.055                     | 412.9519  |
| 42   | 30     | 13     | 42    | 29      | 14      | A    | 0           | 335970.493   | -0.055                     | 412.9519  |
| 42   | 30     | 12     | 42    | 29      | 13      | E    | 0           | 336003.321   | -0.012                     | 412.9416  |
| 54   | 12     | 43     | 53    | 12      | 42      | E    | 0           | 336035.564   | -0.026                     | 395.0523  |
| 54   | 12     | 43     | 53    | 12      | 42      | A    | 0           | 336042.259   | -0.172                     | 395.0493  |
| 41   | 30     | 12     | 41    | 29      | 13      | E    | 0           | 336086.484   | 0.029                      | 404.2960  |
| 54   | 25     | 30     | 53    | 25      | 29      | A    | 0           | 336096.574   | -0.005                     | 481.2645  |
| 54   | 25     | 29     | 53    | 25      | 28      | A    | 0           | 336096.574   | -0.005                     | 481.2645  |
| 41   | 30     | 11     | 41    | 29      | 12      | A    | 0           | 336099.654   | -0.086                     | 404.3089  |
| 41   | 30     | 12     | 41    | 29      | 13      | A    | 0           | 336099.654   | -0.086                     | 404.3089  |
| 24   | 17     | 7      | 23    | 16      | 7       | E    | 0           | 336109.217   | -0.072                     | 172.7499  |
| 24   | 17     | 8      | 23    | 16      | 8       | E    | 0           | 336124.422   | -0.047                     | 172.7367  |
| 41   | 30     | 11     | 41    | 29      | 12      | E    | 0           | 336132.669   | 0.049                      | 404.2986  |
| 53   | 13     | 41     | 52    | 13      | 40      | E    | 0           | 336135.983   | -0.037                     | 388.8733  |
| 53   | 13     | 41     | 52    | 13      | 40      | A    | 0           | 336140.712   | 0.106                      | 388.8701  |
| 24   | 17     | 8      | 23    | 16      | 7       | A    | 0           | 336155.820   | -0.020                     | 172.7464  |
| 24   | 17     | 7      | 23    | 16      | 8       | A    | 0           | 336155.820   | -0.020                     | 172.7464  |
| 40   | 30     | 11     | 40    | 29      | 12      | E    | 0           | 336206.982   | -0.013                     | 395.8615  |
| 40   | 30     | 10     | 40    | 29      | 11      | A    | 0           | 336220.157   | -0.024                     | 395.8744  |
| 40   | 30     | 11     | 40    | 29      | 12      | A    | 0           | 336220.157   | -0.024                     | 395.8744  |
| 40   | 30     | 10     | 40    | 29      | 11      | E    | 0           | 336253.188   | 0.041                      | 395.8641  |
| 34   | 12     | 23     | 33    | 11      | 23      | E    | 0           | 336286.038   | -0.004                     | 206.9360  |
| 39   | 30     | 10     | 39    | 29      | 11      | E    | 0           | 336319.169   | -0.035                     | 387.6353  |
| 39   | 30     | 9      | 39    | 29      | 10      | A    | 0           | 336332.263   | -0.031                     | 387.6482  |
| 39   | 30     | 10     | 39    | 29      | 11      | A    | 0           | 336332.263   | -0.031                     | 387.6482  |
| 38   | 30     | 9      | 38    | 29      | 10      | E    | 0           | 336423.592   | 0.100                      | 379.6172  |
| 38   | 30     | 8      | 38    | 29      | 9       | A    | 0           | 336436.488   | -0.008                     | 379.6302  |
| 38   | 30     | 9      | 38    | 29      | 10      | A    | 0           | 336436.488   | -0.008                     | 379.6302  |
| 37   | 30     | 8      | 37    | 29      | 9       | E    | 0           | 336520.323   | 0.060                      | 371.8071  |
| 37   | 30     | 7      | 37    | 29      | 8       | A    | 0           | 336533.113   | -0.072                     | 371.8200  |
| 37   | 30     | 8      | 37    | 29      | 9       | A    | 0           | 336533.113   | -0.072                     | 371.8200  |
| 54   | 24     | 30     | 53    | 24      | 29      | A    | 0           | 336583.212   | -0.133                     | 472.1217  |
| 54   | 24     | 31     | 53    | 24      | 30      | A    | 0           | 336583.212   | -0.133                     | 472.1217  |
| 34   | 12     | 22     | 33    | 11      | 23      | A    | 0           | 336600.922   | -0.124                     | 206.9325  |
| 54   | 11     | 43     | 53    | 11      | 42      | E    | 0           | 336676.450   | 0.014                      | 394.9967  |
| 34   | 12     | 22     | 33    | 11      | 23      | E    | 0           | 336707.070   | -0.135                     | 206.9360  |
| 53   | 17     | 37     | 52    | 17      | 36      | E    | 0           | 336710.109   | 0.252                      | 408.8636  |
| 52   | 15     | 37     | 51    | 15      | 36      | A    | 0           | 336729.677   | -0.129                     | 387.2935  |
| 52   | 15     | 37     | 51    | 15      | 36      | E    | 0           | 336743.027   | -0.125                     | 387.2954  |
| 34   | 30     | 5      | 34    | 29      | 6       | E    | 0           | 336769.134   | -0.143                     | 349.6224  |
| 34   | 30     | 4      | 34    | 29      | 5       | A    | 0           | 336781.933   | -0.053                     | 349.6354  |
| 34   | 30     | 5      | 34    | 29      | 6       | A    | 0           | 336781.933   | -0.053                     | 349.6354  |
| 34   | 30     | 4      | 34    | 29      | 5       | E    | 0           | 336815.419   | 0.088                      | 349.6251  |
| 53   | 17     | 36     | 52    | 17      | 35      | E    | 0           | 336822.154   | 0.009                      | 408.8773  |
| 53   | 17     | 36     | 52    | 17      | 35      | A    | 0           | 336846.310   | -0.139                     | 408.8761  |
| 33   | 30     | 3      | 33    | 29      | 4       | A    | 0           | 336852.323   | -0.053                     | 342.6552  |
| 33   | 30     | 4      | 33    | 29      | 5       | A    | 0           | 336852.323   | -0.053                     | 342.6552  |
| 26   | 16     | 10     | 25    | 15      | 10      | E    | 0           | 336877.668   | -0.093                     | 176.9732  |
| 26   | 16     | 11     | 25    | 15      | 11      | E    | 0           | 336887.405   | 0.023                      | 176.9596  |
| 26   | 16     | 10     | 25    | 15      | 11      | A    | 0           | 336922.843   | -0.015                     | 176.9681  |
| 26   | 16     | 11     | 25    | 15      | 10      | A    | 0           | 336922.843   | -0.015                     | 176.9681  |
| 52   | 12     | 40     | 51    | 12      | 39      | E    | 0           | 336968.848   | 0.104                      | 377.1386  |
| 54   | 23     | 32     | 53    | 23      | 31      | A    | 0           | 337141.823   | -0.037                     | 463.3882  |
| 54   | 23     | 31     | 53    | 23      | 30      | A    | 0           | 337141.823   | -0.037                     | 463.3882  |
| 28   | 15     | 13     | 27    | 14      | 13      | E    | 0           | 337507.389   | -0.066                     | 182.4583  |
| 28   | 15     | 14     | 27    | 14      | 14      | E    | 0           | 337511.154   | 0.002                      | 182.4447  |
| 28   | 15     | 14     | 27    | 14      | 13      | A    | 0           | 337550.452   | 0.022                      | 182.4518  |
| 28   | 15     | 13     | 27    | 14      | 14      | A    | 0           | 337550.452   | 0.020                      | 182.4518  |
| 32   | 13     | 20     | 31    | 12      | 20      | E    | 0           | 337604.153   | -0.028                     | 197.3573  |
| 32   | 13     | 19     | 31    | 12      | 19      | E    | 0           | 337613.753   | -0.038                     | 197.3702  |
| 32   | 13     | 20     | 31    | 12      | 19      | A    | 0           | 337637.659   | -0.033                     | 197.3612  |
| 32   | 13     | 19     | 31    | 12      | 20      | A    | 0           | 337663.745   | 0.029                      | 197.3605  |
| 54   | 12     | 43     | 53    | 11      | 42      | E    | 0           | 337702.438   | 0.002                      | 394.9967  |
| 54   | 12     | 43     | 53    | 11      | 42      | A    | 0           | 337716.512   | 0.024                      | 394.9934  |
| 54   | 22     | 32     | 53    | 22      | 31      | A    | 0           | 337789.027   | -0.202                     | 455.0700  |
| 54   | 22     | 33     | 53    | 22      | 32      | A    | 0           | 337789.027   | -0.200                     | 455.0700  |
| 54   | 22     | 33     | 53    | 22      | 32      | E    | 0           | 337792.632   | 0.022                      | 455.0575  |
| 30   | 14     | 17     | 29    | 13      | 17      | E    | 0           | 337851.919   | -0.047                     | 189.2253  |
| 30   | 14     | 16     | 29    | 13      | 16      | E    | 0           | 337854.619   | -0.106                     | 189.2387  |
| 30   | 14     | 17     | 29    | 13      | 16      | A    | 0           | 337894.865   | 0.122                      | 189.2307  |
| 35   | 10     | 25     | 34    | 9       | 26      | A    | 0           | 338446.754   | -0.068                     | 207.2204  |
| 35   | 10     | 25     | 34    | 9       | 26      | E    | 0           | 338455.178   | -0.104                     | 207.2272  |
| 53   | 16     | 38     | 52    | 16      | 37      | A    | 0           | 338471.459   | -0.049                     | 403.2767  |
| 53   | 16     | 38     | 52    | 16      | 37      | E    | 0           | 338485.614   | 0.060                      | 403.2758  |
| 54   | 21     | 34     | 53    | 21      | 33      | A    | 0           | 338548.836   | -0.018                     | 447.1747  |
| 54   | 21     | 33     | 53    | 21      | 32      | E    | 0           | 338552.763   | 0.164                      | 447.1719  |
| 70   | 31     | 40     | 70    | 30      | 41      | A    | 0           | 338992.315   | 0.239                      | 751.4997  |
| 70   | 31     | 39     | 70    | 30      | 40      | A    | 0           | 338992.315   | 0.239                      | 751.4997  |



| $J'$ | $K'_a$ | $K'_c$ | $J''$ | $K''_a$ | $K''_c$ | Sym. | $v_{tCH_3}$ | $\nu_{Obs.}$ | $\nu_{Obs.} - \nu_{Calc.}$ | $E_{low}$ |
|------|--------|--------|-------|---------|---------|------|-------------|--------------|----------------------------|-----------|
| 51   | 13     | 38     | 50    | 13      | 37      | A    | 0           | 339160.139   | 0.282                      | 368.9690  |
| 51   | 13     | 38     | 50    | 13      | 37      | E    | 0           | 339160.139   | -0.208                     | 368.9751  |
| 44   | 12     | 33     | 43    | 11      | 32      | E    | 0           | 339183.850   | -0.151                     | 290.7362  |
| 53   | 14     | 40     | 52    | 14      | 39      | A    | 0           | 339364.830   | 0.182                      | 393.4903  |
| 53   | 14     | 40     | 52    | 14      | 39      | E    | 0           | 339364.830   | -0.279                     | 393.4929  |
| 54   | 20     | 35     | 53    | 20      | 34      | A    | 0           | 339454.103   | 0.143                      | 439.7128  |
| 69   | 31     | 39     | 69    | 30      | 40      | E    | 0           | 339537.325   | -0.043                     | 736.9215  |
| 53   | 16     | 37     | 52    | 16      | 36      | A    | 0           | 339615.626   | 0.036                      | 403.3329  |
| 53   | 16     | 37     | 52    | 16      | 36      | E    | 0           | 339618.651   | -0.151                     | 403.3334  |
| 59   | 7      | 52     | 58    | 7       | 51      | A    | 1           | 339672.056   | -0.050                     | 553.3784  |
| 59   | 7      | 52     | 58    | 8       | 51      | A    | 1           | 339672.056   | -0.047                     | 553.3784  |
| 59   | 8      | 52     | 58    | 7       | 51      | A    | 1           | 339672.056   | -0.052                     | 553.3784  |
| 59   | 8      | 52     | 58    | 8       | 51      | A    | 1           | 339672.056   | -0.048                     | 553.3784  |
| 58   | 8      | 50     | 57    | 8       | 49      | A    | 1           | 339673.634   | 0.011                      | 549.4894  |
| 58   | 8      | 50     | 57    | 9       | 49      | A    | 1           | 339673.634   | 0.129                      | 549.4894  |
| 58   | 9      | 50     | 57    | 8       | 49      | A    | 1           | 339673.634   | -0.051                     | 549.4894  |
| 58   | 9      | 50     | 57    | 9       | 49      | A    | 1           | 339673.634   | 0.067                      | 549.4894  |
| 60   | 6      | 54     | 59    | 6       | 53      | A    | 1           | 339751.868   | -0.097                     | 556.7946  |
| 60   | 6      | 54     | 59    | 7       | 53      | A    | 1           | 339751.868   | -0.097                     | 556.7946  |
| 60   | 7      | 54     | 59    | 6       | 53      | A    | 1           | 339751.868   | -0.097                     | 556.7946  |
| 60   | 7      | 54     | 59    | 7       | 53      | A    | 1           | 339751.868   | -0.097                     | 556.7946  |
| 57   | 9      | 48     | 56    | 10      | 47      | A    | 1           | 339803.877   | 0.134                      | 545.0984  |
| 57   | 10     | 48     | 56    | 10      | 47      | A    | 1           | 339805.441   | -0.029                     | 545.0984  |
| 57   | 9      | 48     | 56    | 9       | 47      | A    | 1           | 339806.987   | 0.095                      | 545.0983  |
| 57   | 10     | 48     | 56    | 9       | 47      | A    | 1           | 339808.702   | 0.083                      | 545.0983  |
| 59   | 7      | 52     | 58    | 7       | 51      | E    | 1           | 339813.959   | -0.011                     | 553.2779  |
| 59   | 7      | 52     | 58    | 8       | 51      | E    | 1           | 339813.959   | -0.006                     | 553.2779  |
| 59   | 8      | 52     | 58    | 7       | 51      | E    | 1           | 339813.959   | -0.013                     | 553.2779  |
| 59   | 8      | 52     | 58    | 8       | 51      | E    | 1           | 339813.959   | -0.009                     | 553.2779  |
| 58   | 8      | 50     | 57    | 8       | 49      | E    | 1           | 339830.586   | -0.074                     | 549.4007  |
| 58   | 8      | 50     | 57    | 9       | 49      | E    | 1           | 339830.586   | 0.072                      | 549.4007  |
| 58   | 9      | 50     | 57    | 8       | 49      | E    | 1           | 339830.586   | -0.152                     | 549.4007  |
| 58   | 9      | 50     | 57    | 9       | 49      | E    | 1           | 339830.586   | -0.006                     | 549.4007  |
| 53   | 15     | 39     | 52    | 15      | 38      | A    | 0           | 339844.766   | -0.133                     | 398.1930  |
| 53   | 15     | 39     | 52    | 15      | 38      | E    | 0           | 339850.901   | -0.043                     | 398.1942  |
| 60   | 6      | 54     | 59    | 6       | 53      | E    | 1           | 339879.959   | 0.009                      | 556.6769  |
| 60   | 6      | 54     | 59    | 7       | 53      | E    | 1           | 339879.959   | 0.009                      | 556.6769  |
| 60   | 7      | 54     | 59    | 6       | 53      | E    | 1           | 339879.959   | 0.009                      | 556.6769  |
| 60   | 7      | 54     | 59    | 7       | 53      | E    | 1           | 339879.959   | 0.009                      | 556.6769  |
| 61   | 5      | 56     | 60    | 5       | 55      | A    | 1           | 339884.194   | -0.098                     | 559.7589  |
| 61   | 5      | 56     | 60    | 5       | 55      | A    | 1           | 339884.194   | -0.098                     | 559.7589  |
| 61   | 6      | 56     | 60    | 5       | 55      | A    | 1           | 339884.194   | -0.098                     | 559.7589  |
| 61   | 6      | 56     | 60    | 5       | 55      | A    | 1           | 339884.194   | -0.098                     | 559.7589  |
| 59   | 7      | 52     | 58    | 7       | 51      | E    | 0           | 339886.427   | -0.026                     | 424.9904  |
| 59   | 8      | 52     | 58    | 8       | 51      | E    | 0           | 339886.427   | -0.024                     | 424.9904  |
| 59   | 7      | 52     | 58    | 7       | 51      | A    | 0           | 339890.837   | -0.011                     | 424.9872  |
| 59   | 7      | 52     | 58    | 8       | 51      | A    | 0           | 339890.837   | -0.007                     | 424.9872  |
| 59   | 8      | 52     | 58    | 7       | 51      | A    | 0           | 339890.837   | -0.013                     | 424.9872  |
| 59   | 8      | 52     | 58    | 8       | 51      | A    | 0           | 339890.837   | -0.009                     | 424.9872  |
| 58   | 8      | 50     | 57    | 8       | 49      | E    | 0           | 339900.910   | -0.043                     | 421.1139  |
| 58   | 8      | 50     | 57    | 9       | 49      | E    | 0           | 339900.910   | 0.020                      | 421.1139  |
| 58   | 8      | 50     | 57    | 8       | 49      | A    | 0           | 339905.773   | -0.052                     | 421.1111  |
| 58   | 8      | 50     | 57    | 9       | 49      | A    | 0           | 339905.773   | 0.082                      | 421.1111  |
| 58   | 9      | 50     | 57    | 8       | 49      | A    | 0           | 339905.773   | -0.123                     | 421.1111  |
| 58   | 9      | 50     | 57    | 9       | 49      | A    | 0           | 339905.773   | 0.011                      | 421.1111  |
| 60   | 6      | 54     | 59    | 6       | 53      | E    | 0           | 339953.714   | -0.003                     | 428.3902  |
| 60   | 7      | 54     | 59    | 7       | 53      | E    | 0           | 339953.714   | -0.003                     | 428.3902  |
| 60   | 6      | 54     | 59    | 6       | 53      | A    | 0           | 339957.666   | -0.009                     | 428.3865  |
| 60   | 6      | 54     | 59    | 7       | 53      | A    | 0           | 339957.666   | -0.009                     | 428.3865  |
| 60   | 7      | 54     | 59    | 6       | 53      | A    | 0           | 339957.666   | -0.009                     | 428.3865  |
| 60   | 7      | 54     | 59    | 7       | 53      | A    | 0           | 339957.666   | -0.009                     | 428.3865  |
| 57   | 9      | 48     | 56    | 10      | 47      | E    | 1           | 339978.799   | -0.053                     | 545.0160  |
| 57   | 10     | 48     | 56    | 9       | 47      | E    | 1           | 339984.795   | 0.043                      | 545.0158  |
| 62   | 4      | 58     | 61    | 4       | 57      | A    | 1           | 340051.048   | -0.213                     | 562.2872  |
| 62   | 4      | 58     | 61    | 5       | 57      | A    | 1           | 340051.048   | -0.213                     | 562.2872  |
| 62   | 5      | 58     | 61    | 4       | 57      | A    | 1           | 340051.048   | -0.213                     | 562.2872  |
| 62   | 5      | 58     | 61    | 5       | 57      | A    | 1           | 340051.048   | -0.213                     | 562.2872  |
| 57   | 10     | 48     | 56    | 9       | 47      | A    | 0           | 340056.239   | -0.018                     | 416.7288  |
| 61   | 5      | 56     | 60    | 5       | 55      | E    | 0           | 340073.067   | 0.031                      | 431.3341  |
| 61   | 6      | 56     | 60    | 6       | 55      | E    | 0           | 340073.067   | 0.031                      | 431.3341  |
| 61   | 5      | 56     | 60    | 5       | 55      | A    | 0           | 340076.588   | 0.033                      | 431.3297  |
| 61   | 5      | 56     | 60    | 6       | 55      | A    | 0           | 340076.588   | 0.033                      | 431.3297  |
| 61   | 6      | 56     | 60    | 5       | 55      | A    | 0           | 340076.588   | 0.033                      | 431.3297  |
| 61   | 6      | 56     | 60    | 6       | 55      | A    | 0           | 340076.588   | 0.033                      | 431.3297  |
| 68   | 31     | 38     | 68    | 30      | 39      | A    | 0           | 340085.220   | -0.000                     | 722.5822  |
| 68   | 31     | 37     | 68    | 30      | 38      | A    | 0           | 340085.220   | -0.000                     | 722.5822  |
| 35   | 12     | 24     | 34    | 11      | 23      | E    | 0           | 340094.271   | 0.009                      | 214.1885  |
| 56   | 10     | 46     | 55    | 11      | 45      | A    | 1           | 340114.334   | 0.058                      | 540.1628  |
| 62   | 4      | 58     | 61    | 4       | 57      | E    | 1           | 340150.447   | 0.177                      | 562.1181  |
| 62   | 4      | 58     | 61    | 5       | 57      | E    | 1           | 340150.447   | 0.177                      | 562.1181  |
| 62   | 5      | 58     | 61    | 4       | 57      | E    | 1           | 340150.447   | 0.176                      | 562.1181  |
| 62   | 5      | 58     | 61    | 5       | 57      | E    | 1           | 340150.447   | 0.177                      | 562.1181  |
| 56   | 11     | 46     | 55    | 10      | 45      | A    | 1           | 340214.900   | 0.151                      | 540.1606  |
| 62   | 4      | 58     | 61    | 4       | 57      | E    | 0           | 340225.856   | -0.082                     | 433.8375  |
| 62   | 5      | 58     | 61    | 5       | 57      | E    | 0           | 340225.856   | -0.082                     | 433.8375  |
| 62   | 4      | 58     | 61    | 4       | 57      | A    | 0           | 340229.002   | 0.016                      | 433.8322  |
| 62   | 4      | 58     | 61    | 5       | 57      | A    | 0           | 340229.002   | 0.016                      | 433.8322  |
| 62   | 5      | 58     | 61    | 4       | 57      | A    | 0           | 340229.002   | 0.016                      | 433.8322  |
| 62   | 5      | 58     | 61    | 5       | 57      | A    | 0           | 340229.002   | 0.016                      | 433.8322  |
| 35   | 12     | 24     | 34    | 11      | 23      | A    | 0           | 340235.040   | -0.084                     | 214.1831  |
| 63   | 3      | 60     | 62    | 3       | 59      | A    | 1           | 340241.319   | -0.125                     | 564.3917  |
| 63   | 3      | 60     | 62    | 4       | 59      | A    | 1           | 340241.319   | -0.125                     | 564.3917  |
| 63   | 4      | 60     | 62    | 3       | 59      | A    | 1           | 340241.319   | -0.125                     | 564.3917  |
| 63   | 4      | 60     | 62    | 4       | 59      | A    | 1           | 340241.319   | -0.125                     | 564.3917  |
| 56   | 10     | 46     | 55    | 11      | 45      | E    | 1           | 340307.214   | -0.017                     | 540.0806  |
| 63   | 3      | 60     | 62    | 3       | 59      | E    | 1           | 340323.449   | 0.052                      | 564.1874  |
| 63   | 3      | 60     | 62    | 4       | 59      | E    | 1           | 340323.449   | 0.052                      | 564.1874  |
| 63   | 4      | 60     | 62    | 3       | 59      | E    | 1           | 340323.449   | 0.052                      | 564.1874  |
| 63   | 4      | 60     | 62    | 4       | 59      | E    | 1           | 340323.449   | 0.052                      | 564.1874  |
| 56   | 11     | 46     | 55    | 11      | 45      | E    | 1           | 340350.449   | -0.077                     | 540.0806  |
| 56   | 10     | 46     | 55    | 11      | 45      | E    | 0           | 340370.030   | 0.081                      | 411.8005  |
| 56   | 10     | 46     | 55    | 11      | 45      | A    | 0           | 340375.876   | -0.048                     | 411.7979  |
| 56   | 10     | 46     | 55    | 10      | 45      | E    | 1           | 340382.437   | 0.066                      | 540.0781  |
| 63   | 3      | 60     | 62    | 3       | 59      | E    | 0           | 340400.442   | 0.039                      | 435.9124  |
| 63   | 4      | 60     | 62    | 4       | 59      | E    | 0           | 340400.442   | 0.039                      | 435.9124  |
| 63   | 3      | 60     | 62    | 3       | 59      | A    | 0           | 340402.936   | 0.017                      | 435.9060  |
| 63   | 3      | 60     | 62    | 4       | 59      | A    | 0           | 340402.936   | 0.017                      | 435.9060  |
| 63   | 4      | 60     | 62    | 3       | 59      | A    | 0           | 340402.936   | 0.017                      | 435.9060  |
| 63   | 4      | 60     | 62    | 4       | 59      | A    | 0           | 340402.936   | 0.017                      | 435.9060  |
| 56   | 11     | 46     | 55    | 11      | 45      | E    | 0           | 340410.057   | 0.025                      | 411.8005  |
| 56   | 11     | 46     | 55    | 11      | 45      | A    | 0           | 340416.129   | -0.101                     | 411.7979  |
| 56   | 11     | 46     | 55    | 10      | 45      | E    | 1           | 340425.700   | 0.035                      | 540.0781  |
| 55   | 11     | 44     | 54    | 12      | 43      | E    | 0           | 340428.509   | 0.050                      | 406.2612  |
| 55   | 11     | 44     | 54    | 12      | 43      | A    | 0           | 340432.316   | -0.064                     | 406.2584  |
| 56   | 10     | 46     | 55    | 10      | 45      | E    | 0           | 340439.782   | 0.070                      | 411.7982  |
| 64   | 2      | 62     | 63    | 2       | 61      | A    | 1           | 340447.340   | -0.019                     | 566.0824  |



| $J'$ | $K'_a$ | $K'_c$ | $J''$ | $K''_a$ | $K''_c$ | Sym. | $v_{tCH_3}$ | $\nu_{Obs.}$ | $\nu_{Obs.} - \nu_{Calc.}$ | $E_{low}$ |
|------|--------|--------|-------|---------|---------|------|-------------|--------------|----------------------------|-----------|
| 64   | 2      | 62     | 63    | 3       | 61      | A    | 1           | 340447.340   | -0.019                     | 566.0824  |
| 64   | 3      | 62     | 63    | 2       | 61      | A    | 1           | 340447.340   | -0.019                     | 566.0824  |
| 64   | 3      | 62     | 63    | 3       | 61      | A    | 1           | 340447.340   | -0.019                     | 566.0824  |
| 56   | 11     | 46     | 55    | 10      | 45      | E    | 0           | 340479.786   | -0.009                     | 411.7982  |
| 56   | 11     | 46     | 55    | 10      | 45      | A    | 0           | 340486.389   | 0.021                      | 411.7956  |
| 64   | 2      | 62     | 63    | 2       | 61      | E    | 1           | 340509.384   | 0.070                      | 565.8354  |
| 64   | 2      | 62     | 63    | 3       | 61      | E    | 1           | 340509.384   | 0.070                      | 565.8354  |
| 64   | 3      | 62     | 63    | 2       | 61      | E    | 1           | 340509.384   | 0.070                      | 565.8354  |
| 64   | 3      | 62     | 63    | 3       | 61      | E    | 1           | 340509.384   | 0.070                      | 565.8354  |
| 54   | 19     | 36     | 53    | 19      | 35      | A    | 0           | 340553.125   | -0.071                     | 432.6983  |
| 54   | 19     | 35     | 53    | 19      | 34      | A    | 0           | 340557.591   | 0.304                      | 432.6984  |
| 21   | 19     | 2      | 20    | 18      | 2       | E    | 0           | 340559.347   | -0.006                     | 172.1183  |
| 54   | 19     | 36     | 53    | 19      | 35      | E    | 0           | 340561.032   | -0.225                     | 432.6881  |
| 21   | 19     | 3      | 20    | 18      | 3       | E    | 0           | 340584.662   | 0.049                      | 172.1063  |
| 64   | 2      | 62     | 63    | 2       | 61      | E    | 0           | 340588.426   | 0.081                      | 437.5680  |
| 64   | 3      | 62     | 63    | 3       | 61      | E    | 0           | 340588.426   | 0.081                      | 437.5680  |
| 64   | 2      | 62     | 63    | 2       | 61      | A    | 0           | 340590.227   | -0.016                     | 437.5603  |
| 64   | 2      | 62     | 63    | 3       | 61      | A    | 0           | 340590.227   | -0.016                     | 437.5603  |
| 64   | 3      | 62     | 63    | 2       | 61      | A    | 0           | 340590.227   | -0.016                     | 437.5603  |
| 64   | 3      | 62     | 63    | 3       | 61      | A    | 0           | 340590.227   | -0.016                     | 437.5603  |
| 67   | 31     | 37     | 67    | 30      | 38      | A    | 0           | 340593.944   | 0.129                      | 708.4469  |
| 67   | 31     | 36     | 67    | 30      | 37      | A    | 0           | 340593.944   | 0.129                      | 708.4469  |
| 21   | 19     | 3      | 20    | 18      | 2       | A    | 0           | 340606.772   | -0.039                     | 172.1180  |
| 21   | 19     | 2      | 20    | 18      | 3       | A    | 0           | 340606.772   | -0.039                     | 172.1180  |
| 35   | 12     | 23     | 34    | 11      | 23      | E    | 0           | 340615.805   | 0.011                      | 214.1885  |
| 65   | 1      | 64     | 64    | 2       | 63      | A    | 1           | 340664.132   | 0.029                      | 567.3675  |
| 65   | 2      | 64     | 64    | 1       | 63      | A    | 1           | 340664.132   | 0.029                      | 567.3675  |
| 65   | 1      | 64     | 64    | 1       | 63      | E    | 1           | 340702.292   | 0.169                      | 567.0695  |
| 65   | 2      | 64     | 64    | 2       | 63      | E    | 1           | 340702.292   | 0.169                      | 567.0695  |
| 55   | 12     | 44     | 54    | 12      | 43      | A    | 1           | 340776.499   | 0.137                      | 534.6230  |
| 65   | 1      | 64     | 64    | 1       | 63      | E    | 0           | 340784.033   | -0.168                     | 438.8119  |
| 65   | 2      | 64     | 64    | 2       | 63      | E    | 0           | 340784.033   | -0.168                     | 438.8119  |
| 65   | 1      | 64     | 64    | 1       | 63      | A    | 0           | 340785.515   | 0.148                      | 438.8026  |
| 65   | 1      | 64     | 64    | 2       | 63      | A    | 0           | 340785.515   | 0.148                      | 438.8026  |
| 65   | 2      | 64     | 64    | 1       | 63      | A    | 0           | 340785.515   | 0.148                      | 438.8026  |
| 65   | 2      | 64     | 64    | 2       | 63      | A    | 0           | 340785.515   | 0.148                      | 438.8026  |
| 66   | 0      | 66     | 65    | 0       | 65      | A    | 1           | 340888.728   | 0.202                      | 568.2539  |
| 66   | 0      | 66     | 65    | 1       | 65      | A    | 1           | 340888.728   | 0.202                      | 568.2539  |
| 66   | 1      | 66     | 65    | 0       | 65      | A    | 1           | 340888.728   | 0.202                      | 568.2539  |
| 66   | 1      | 66     | 65    | 1       | 65      | A    | 1           | 340888.728   | 0.202                      | 568.2539  |
| 66   | 0      | 66     | 65    | 0       | 65      | E    | 1           | 340897.674   | 0.114                      | 567.8953  |
| 66   | 0      | 66     | 65    | 1       | 65      | E    | 1           | 340897.674   | 0.114                      | 567.8953  |
| 66   | 0      | 66     | 65    | 0       | 65      | A    | 0           | 340984.236   | -0.132                     | 439.6390  |
| 66   | 0      | 66     | 65    | 1       | 65      | A    | 0           | 340984.236   | -0.132                     | 439.6390  |
| 66   | 1      | 66     | 65    | 0       | 65      | A    | 0           | 340984.236   | -0.132                     | 439.6390  |
| 66   | 1      | 66     | 65    | 1       | 65      | A    | 0           | 340984.236   | -0.132                     | 439.6390  |
| 66   | 0      | 66     | 65    | 0       | 65      | E    | 0           | 340984.236   | 0.157                      | 439.6502  |
| 66   | 1      | 66     | 65    | 1       | 65      | E    | 0           | 340984.236   | 0.157                      | 439.6502  |
| 55   | 29     | 27     | 54    | 29      | 26      | A    | 0           | 340993.588   | 0.146                      | 533.0116  |
| 55   | 29     | 26     | 54    | 29      | 25      | A    | 0           | 340993.588   | 0.146                      | 533.0116  |
| 55   | 29     | 26     | 54    | 29      | 25      | E    | 0           | 340993.588   | -0.122                     | 533.0014  |
| 55   | 29     | 27     | 54    | 29      | 26      | E    | 0           | 340995.486   | 0.122                      | 532.9992  |
| 55   | 12     | 44     | 54    | 12      | 43      | E    | 1           | 340999.095   | -0.069                     | 534.5345  |
| 55   | 12     | 44     | 54    | 12      | 43      | E    | 0           | 341052.081   | 0.129                      | 406.2612  |
| 55   | 12     | 44     | 54    | 12      | 43      | A    | 0           | 341058.817   | 0.008                      | 406.2584  |
| 66   | 31     | 36     | 66    | 30      | 37      | E    | 0           | 341065.219   | -0.097                     | 694.5147  |
| 66   | 31     | 36     | 66    | 30      | 37      | A    | 0           | 341078.390   | -0.053                     | 694.5266  |
| 66   | 31     | 35     | 66    | 30      | 36      | A    | 0           | 341078.390   | -0.053                     | 694.5266  |
| 66   | 31     | 35     | 66    | 30      | 36      | E    | 0           | 341109.769   | -0.140                     | 694.5177  |
| 36   | 11     | 25     | 35    | 10      | 26      | E    | 0           | 341236.442   | -0.018                     | 217.9781  |
| 55   | 28     | 27     | 54    | 28      | 26      | A    | 0           | 341314.038   | 0.028                      | 522.2797  |
| 55   | 28     | 28     | 54    | 28      | 27      | A    | 0           | 341314.038   | 0.028                      | 522.2797  |
| 55   | 28     | 28     | 54    | 28      | 27      | E    | 0           | 341316.232   | 0.070                      | 522.2680  |
| 56   | 13     | 43     | 55    | 14      | 42      | A    | 0           | 341397.273   | -0.003                     | 428.0388  |
| 23   | 18     | 5      | 22    | 17      | 5       | E    | 0           | 341414.629   | -0.033                     | 174.2907  |
| 23   | 18     | 6      | 22    | 17      | 6       | E    | 0           | 341435.045   | 0.021                      | 174.2780  |
| 54   | 13     | 42     | 53    | 13      | 41      | E    | 0           | 341440.190   | 0.031                      | 400.0856  |
| 56   | 13     | 43     | 55    | 14      | 42      | E    | 0           | 341443.802   | 0.238                      | 428.0413  |
| 54   | 13     | 42     | 53    | 13      | 41      | A    | 0           | 341445.453   | -0.126                     | 400.0826  |
| 55   | 11     | 44     | 54    | 11      | 43      | E    | 0           | 341454.431   | -0.026                     | 406.2270  |
| 23   | 18     | 5      | 22    | 17      | 6       | A    | 0           | 341461.906   | -0.082                     | 174.2888  |
| 23   | 18     | 6      | 22    | 17      | 5       | A    | 0           | 341461.906   | -0.082                     | 174.2888  |
| 65   | 31     | 35     | 65    | 30      | 36      | A    | 0           | 341540.178   | 0.116                      | 680.8210  |
| 65   | 31     | 34     | 65    | 30      | 35      | A    | 0           | 341540.178   | 0.116                      | 680.8210  |
| 55   | 27     | 29     | 54    | 27      | 28      | A    | 0           | 341671.661   | -0.114                     | 511.9445  |
| 55   | 27     | 28     | 54    | 27      | 27      | A    | 0           | 341671.661   | -0.114                     | 511.9445  |
| 55   | 27     | 28     | 54    | 27      | 27      | E    | 0           | 341674.305   | 0.139                      | 511.9337  |
| 54   | 18     | 37     | 53    | 18      | 36      | A    | 0           | 341914.588   | -0.042                     | 426.1512  |
| 54   | 18     | 37     | 53    | 18      | 36      | E    | 0           | 341937.782   | -0.004                     | 426.1429  |
| 54   | 18     | 36     | 53    | 18      | 35      | E    | 0           | 341942.326   | 0.144                      | 426.1543  |
| 54   | 18     | 36     | 53    | 18      | 35      | A    | 0           | 341953.067   | -0.151                     | 426.1527  |
| 64   | 31     | 34     | 64    | 30      | 35      | E    | 0           | 341967.015   | -0.142                     | 667.3177  |
| 64   | 31     | 34     | 64    | 30      | 35      | A    | 0           | 341979.613   | 0.025                      | 667.3298  |
| 64   | 31     | 33     | 64    | 30      | 34      | A    | 0           | 341979.613   | 0.025                      | 667.3298  |
| 55   | 26     | 29     | 54    | 26      | 28      | A    | 0           | 342073.440   | -0.007                     | 502.0087  |
| 55   | 26     | 30     | 54    | 26      | 29      | A    | 0           | 342073.440   | -0.007                     | 502.0087  |
| 55   | 12     | 44     | 54    | 11      | 43      | E    | 0           | 342077.956   | 0.005                      | 406.2270  |
| 25   | 17     | 8      | 24    | 16      | 8       | E    | 0           | 342234.417   | -0.092                     | 177.6939  |
| 25   | 17     | 9      | 24    | 16      | 9       | E    | 0           | 342249.616   | -0.001                     | 177.6806  |
| 55   | 12     | 43     | 54    | 13      | 42      | A    | 0           | 342266.577   | 0.006                      | 411.4720  |
| 55   | 12     | 43     | 54    | 13      | 42      | E    | 0           | 342277.854   | 0.023                      | 411.4748  |
| 25   | 17     | 9      | 24    | 16      | 8       | A    | 0           | 342281.019   | -0.019                     | 177.6904  |
| 25   | 17     | 8      | 24    | 16      | 9       | A    | 0           | 342281.019   | -0.019                     | 177.6904  |
| 35   | 12     | 23     | 34    | 11      | 24      | A    | 0           | 342306.494   | -0.064                     | 214.1262  |
| 63   | 31     | 33     | 63    | 30      | 34      | E    | 0           | 342385.436   | -0.356                     | 654.0404  |
| 63   | 31     | 33     | 63    | 30      | 34      | A    | 0           | 342397.888   | -0.007                     | 654.0526  |
| 63   | 31     | 32     | 63    | 30      | 33      | A    | 0           | 342397.888   | -0.007                     | 654.0526  |
| 63   | 31     | 32     | 63    | 30      | 33      | E    | 0           | 342430.437   | -0.028                     | 654.0436  |
| 55   | 25     | 31     | 54    | 25      | 30      | A    | 0           | 342527.394   | -0.052                     | 492.4755  |
| 55   | 25     | 30     | 54    | 25      | 29      | A    | 0           | 342527.394   | -0.052                     | 492.4755  |
| 62   | 31     | 32     | 62    | 30      | 33      | E    | 0           | 342783.910   | -0.123                     | 640.9768  |
| 62   | 31     | 32     | 62    | 30      | 33      | A    | 0           | 342795.819   | -0.005                     | 640.9891  |
| 62   | 31     | 31     | 62    | 30      | 32      | A    | 0           | 342795.819   | -0.005                     | 640.9891  |
| 27   | 16     | 11     | 26    | 15      | 11      | E    | 0           | 342974.080   | -0.070                     | 182.3430  |
| 27   | 16     | 12     | 26    | 15      | 12      | E    | 0           | 342983.638   | -0.015                     | 182.3295  |
| 27   | 16     | 11     | 26    | 15      | 12      | A    | 0           | 343019.192   | -0.022                     | 182.3379  |
| 27   | 16     | 12     | 26    | 15      | 11      | A    | 0           | 343019.192   | -0.022                     | 182.3379  |
| 55   | 24     | 31     | 54    | 24      | 30      | A    | 0           | 343044.490   | -0.036                     | 483.3489  |
| 55   | 24     | 32     | 54    | 24      | 31      | A    | 0           | 343044.490   | -0.036                     | 483.3489  |
| 61   | 31     | 31     | 61    | 30      | 32      | E    | 0           | 343162.695   | 0.007                      | 628.1267  |
| 61   | 31     | 31     | 61    | 30      | 32      | A    | 0           | 343174.167   | -0.013                     | 628.1390  |
| 61   | 31     | 30     | 61    | 30      | 31      | A    | 0           | 343174.167   | -0.013                     | 628.1390  |
| 61   | 31     | 30     | 61    | 30      | 31      | E    | 0           | 343207.422   | 0.030                      | 628.1300  |
| 33   | 13     | 21     | 32    | 12      | 21      | E    | 0           | 343337.308   | -0.004                     | 204.0667  |
| 33   | 13     | 20     | 32    | 12      | 20      | E    | 0           | 343345.401   | -0.021                     | 204.0796  |
| 33   | 13     | 21     | 32    | 12      | 20      | A    | 0           | 343355.743   | -0.020                     | 204.0709  |



| $J'$ | $K'_a$ | $K'_c$ | $J''$ | $K''_a$ | $K''_c$ | Sym. | $v_{tCH_3}$ | $\nu_{Obs.}$ | $\nu_{Obs.} - \nu_{Calc.}$ | $E_{low}$ |
|------|--------|--------|-------|---------|---------|------|-------------|--------------|----------------------------|-----------|
| 33   | 13     | 20     | 32    | 12      | 21      | A    | 0           | 343410.789   | -0.065                     | 204.0694  |
| 60   | 31     | 30     | 60    | 30      | 31      | E    | 0           | 343522.266   | -0.264                     | 615.4896  |
| 60   | 31     | 30     | 60    | 30      | 31      | A    | 0           | 343533.643   | -0.093                     | 615.5020  |
| 60   | 31     | 29     | 60    | 30      | 30      | A    | 0           | 343533.643   | -0.093                     | 615.5020  |
| 29   | 15     | 14     | 28    | 14      | 14      | E    | 0           | 343549.011   | -0.052                     | 188.2614  |
| 29   | 15     | 15     | 28    | 14      | 15      | E    | 0           | 343552.579   | 0.023                      | 188.2478  |
| 60   | 31     | 29     | 60    | 30      | 30      | E    | 0           | 343567.194   | -0.051                     | 615.4929  |
| 29   | 15     | 15     | 28    | 14      | 14      | A    | 0           | 343591.940   | -0.044                     | 188.2548  |
| 54   | 17     | 38     | 53    | 17      | 37      | A    | 0           | 343591.940   | 0.003                      | 420.0990  |
| 54   | 17     | 38     | 53    | 17      | 37      | E    | 0           | 343623.679   | -0.099                     | 420.0951  |
| 55   | 23     | 33     | 54    | 23      | 32      | A    | 0           | 343638.679   | -0.029                     | 474.6341  |
| 55   | 23     | 32     | 54    | 23      | 31      | A    | 0           | 343638.679   | -0.029                     | 474.6341  |
| 55   | 23     | 33     | 54    | 23      | 32      | E    | 0           | 343641.854   | 0.180                      | 474.6214  |
| 43   | 12     | 32     | 42    | 11      | 31      | E    | 0           | 343662.086   | -0.114                     | 281.2068  |
| 43   | 12     | 32     | 42    | 11      | 31      | A    | 0           | 343756.260   | 0.012                      | 281.1995  |
| 52   | 14     | 38     | 51    | 14      | 37      | A    | 0           | 343768.891   | -0.071                     | 383.3135  |
| 52   | 14     | 38     | 51    | 14      | 37      | E    | 0           | 343783.225   | -0.079                     | 383.3181  |
| 31   | 14     | 18     | 30    | 13      | 18      | E    | 0           | 343789.953   | 0.006                      | 195.4726  |
| 31   | 14     | 17     | 30    | 13      | 17      | E    | 0           | 343793.030   | -0.042                     | 195.4860  |
| 31   | 14     | 18     | 30    | 13      | 17      | A    | 0           | 343833.129   | 0.336                      | 195.4780  |
| 59   | 31     | 29     | 59    | 30      | 30      | A    | 0           | 343875.082   | -0.154                     | 603.0778  |
| 59   | 31     | 28     | 59    | 30      | 29      | A    | 0           | 343875.082   | -0.154                     | 603.0778  |
| 54   | 17     | 37     | 53    | 17      | 36      | E    | 0           | 343875.082   | 0.398                      | 420.1125  |
| 54   | 17     | 37     | 53    | 17      | 36      | A    | 0           | 343891.980   | 0.150                      | 420.1121  |
| 58   | 31     | 28     | 58    | 30      | 29      | E    | 0           | 344188.494   | -0.229                     | 590.8534  |
| 58   | 31     | 28     | 58    | 30      | 29      | A    | 0           | 344199.379   | -0.017                     | 590.8660  |
| 58   | 31     | 27     | 58    | 30      | 28      | A    | 0           | 344199.379   | -0.017                     | 590.8660  |
| 58   | 31     | 27     | 58    | 30      | 28      | E    | 0           | 344233.269   | -0.179                     | 590.8569  |
| 36   | 12     | 25     | 35    | 11      | 24      | E    | 0           | 344404.241   | -0.049                     | 221.6495  |
| 57   | 31     | 27     | 57    | 30      | 28      | E    | 0           | 344496.420   | -0.058                     | 578.8538  |
| 57   | 31     | 27     | 57    | 30      | 28      | A    | 0           | 344506.820   | -0.083                     | 578.8664  |
| 57   | 31     | 26     | 57    | 30      | 27      | A    | 0           | 344506.820   | -0.083                     | 578.8664  |
| 36   | 12     | 25     | 35    | 11      | 24      | A    | 0           | 344508.745   | -0.101                     | 221.6441  |
| 57   | 31     | 26     | 57    | 30      | 27      | E    | 0           | 344541.185   | -0.019                     | 578.8573  |
| 59   | 8      | 51     | 58    | 8       | 50      | A    | 1           | 344771.136   | -0.013                     | 560.8197  |
| 59   | 9      | 51     | 58    | 9       | 50      | A    | 1           | 344771.136   | 0.049                      | 560.8197  |
| 59   | 9      | 51     | 58    | 8       | 50      | A    | 1           | 344771.136   | -0.046                     | 560.8197  |
| 59   | 9      | 51     | 58    | 9       | 50      | A    | 1           | 344771.136   | 0.016                      | 560.8197  |
| 60   | 7      | 53     | 59    | 7       | 52      | A    | 1           | 344781.280   | -0.044                     | 564.7087  |
| 60   | 7      | 53     | 59    | 8       | 52      | A    | 1           | 344781.280   | -0.042                     | 564.7087  |
| 60   | 8      | 53     | 59    | 7       | 52      | A    | 1           | 344781.280   | -0.045                     | 564.7087  |
| 60   | 8      | 53     | 59    | 8       | 52      | A    | 1           | 344781.280   | -0.043                     | 564.7087  |
| 56   | 31     | 26     | 56    | 30      | 27      | A    | 0           | 344798.341   | -0.081                     | 567.0787  |
| 56   | 31     | 25     | 56    | 30      | 26      | A    | 0           | 344798.341   | -0.081                     | 567.0787  |
| 56   | 31     | 25     | 56    | 30      | 26      | E    | 0           | 344832.919   | -0.038                     | 567.0696  |
| 54   | 12     | 42     | 53    | 12      | 41      | E    | 0           | 344835.744   | -0.017                     | 399.7485  |
| 61   | 6      | 55     | 60    | 6       | 54      | A    | 1           | 344867.548   | -0.096                     | 568.1275  |
| 61   | 6      | 55     | 60    | 7       | 54      | A    | 1           | 344867.548   | -0.096                     | 568.1275  |
| 61   | 7      | 55     | 60    | 6       | 54      | A    | 1           | 344867.548   | -0.096                     | 568.1275  |
| 61   | 7      | 55     | 60    | 7       | 54      | A    | 1           | 344867.548   | -0.096                     | 568.1275  |
| 58   | 9      | 49     | 57    | 10      | 48      | A    | 1           | 344880.738   | 0.049                      | 556.4331  |
| 58   | 10     | 49     | 57    | 9       | 48      | A    | 1           | 344883.370   | 0.013                      | 556.4330  |
| 60   | 7      | 53     | 59    | 7       | 52      | E    | 1           | 344921.404   | 0.086                      | 564.6129  |
| 60   | 7      | 53     | 59    | 8       | 52      | E    | 1           | 344921.404   | 0.089                      | 564.6129  |
| 60   | 8      | 53     | 59    | 7       | 52      | E    | 1           | 344921.404   | 0.085                      | 564.6129  |
| 60   | 8      | 53     | 59    | 8       | 52      | E    | 1           | 344921.404   | 0.087                      | 564.6129  |
| 59   | 8      | 51     | 58    | 8       | 50      | E    | 1           | 344925.544   | -0.008                     | 560.7362  |
| 59   | 8      | 51     | 58    | 9       | 50      | E    | 1           | 344925.544   | 0.070                      | 560.7362  |
| 59   | 9      | 51     | 58    | 8       | 50      | E    | 1           | 344925.544   | -0.049                     | 560.7362  |
| 59   | 9      | 51     | 58    | 9       | 50      | E    | 1           | 344925.544   | 0.029                      | 560.7362  |
| 61   | 6      | 55     | 60    | 6       | 54      | E    | 1           | 344994.416   | 0.111                      | 568.0141  |
| 61   | 6      | 55     | 60    | 7       | 54      | E    | 1           | 344994.416   | 0.111                      | 568.0141  |
| 61   | 7      | 55     | 60    | 6       | 54      | E    | 1           | 344994.416   | 0.111                      | 568.0141  |
| 61   | 7      | 55     | 60    | 7       | 54      | E    | 1           | 344994.416   | 0.111                      | 568.0141  |
| 60   | 8      | 53     | 59    | 8       | 52      | E    | 0           | 344996.187   | -0.012                     | 436.3278  |
| 59   | 8      | 51     | 58    | 8       | 50      | E    | 0           | 344998.606   | 0.028                      | 432.4518  |
| 59   | 9      | 51     | 58    | 9       | 50      | E    | 0           | 344998.606   | 0.061                      | 432.4518  |
| 60   | 7      | 53     | 59    | 7       | 52      | A    | 0           | 345000.522   | -0.016                     | 436.3248  |
| 60   | 7      | 53     | 59    | 8       | 52      | A    | 0           | 345000.522   | -0.014                     | 436.3248  |
| 60   | 8      | 53     | 59    | 7       | 52      | A    | 0           | 345000.522   | -0.017                     | 436.3248  |
| 60   | 8      | 53     | 59    | 8       | 52      | A    | 0           | 345000.522   | -0.015                     | 436.3248  |
| 62   | 5      | 57     | 61    | 5       | 56      | A    | 1           | 345003.376   | -0.181                     | 571.0963  |
| 62   | 5      | 57     | 61    | 6       | 56      | A    | 1           | 345003.376   | -0.181                     | 571.0963  |
| 62   | 6      | 57     | 61    | 5       | 56      | A    | 1           | 345003.376   | -0.181                     | 571.0963  |
| 62   | 6      | 57     | 61    | 6       | 56      | A    | 1           | 345003.376   | -0.181                     | 571.0963  |
| 58   | 9      | 49     | 57    | 10      | 48      | E    | 1           | 345052.207   | 0.004                      | 556.3565  |
| 58   | 10     | 49     | 57    | 9       | 48      | E    | 1           | 345055.568   | 0.117                      | 556.3564  |
| 61   | 6      | 55     | 60    | 6       | 54      | A    | 0           | 345074.270   | 0.124                      | 439.7263  |
| 61   | 6      | 55     | 60    | 7       | 54      | A    | 0           | 345074.270   | 0.124                      | 439.7263  |
| 61   | 7      | 55     | 60    | 6       | 54      | A    | 0           | 345074.270   | 0.124                      | 439.7263  |
| 61   | 7      | 55     | 60    | 7       | 54      | A    | 0           | 345074.270   | 0.124                      | 439.7263  |
| 62   | 5      | 57     | 61    | 5       | 56      | E    | 1           | 345116.715   | 0.021                      | 570.9596  |
| 62   | 5      | 57     | 61    | 6       | 56      | E    | 1           | 345116.715   | 0.021                      | 570.9596  |
| 62   | 6      | 57     | 61    | 5       | 56      | E    | 1           | 345116.715   | 0.021                      | 570.9596  |
| 62   | 6      | 57     | 61    | 6       | 56      | E    | 1           | 345116.715   | 0.021                      | 570.9596  |
| 57   | 10     | 47     | 56    | 11      | 46      | A    | 1           | 345168.669   | 0.104                      | 551.5090  |
| 63   | 4      | 59     | 62    | 4       | 58      | A    | 1           | 345172.344   | -0.142                     | 573.6301  |
| 63   | 4      | 59     | 62    | 5       | 58      | A    | 1           | 345172.344   | -0.142                     | 573.6301  |
| 63   | 5      | 59     | 62    | 4       | 58      | A    | 1           | 345172.344   | -0.142                     | 573.6301  |
| 63   | 5      | 59     | 62    | 5       | 58      | A    | 1           | 345172.344   | -0.142                     | 573.6301  |
| 52   | 13     | 39     | 51    | 13      | 38      | E    | 0           | 345190.243   | 0.177                      | 380.2883  |
| 62   | 5      | 57     | 61    | 5       | 56      | E    | 0           | 345193.388   | 0.036                      | 442.6777  |
| 62   | 6      | 57     | 61    | 6       | 56      | E    | 0           | 345193.388   | 0.036                      | 442.6777  |
| 62   | 5      | 57     | 61    | 5       | 56      | A    | 0           | 345196.873   | 0.030                      | 442.6734  |
| 62   | 5      | 57     | 61    | 6       | 56      | A    | 0           | 345196.873   | 0.030                      | 442.6734  |
| 62   | 6      | 57     | 61    | 5       | 56      | A    | 0           | 345196.873   | 0.030                      | 442.6734  |
| 62   | 6      | 57     | 61    | 6       | 56      | A    | 0           | 345196.873   | 0.030                      | 442.6734  |
| 57   | 11     | 47     | 56    | 10      | 46      | A    | 1           | 345226.066   | 0.114                      | 551.5078  |
| 63   | 4      | 59     | 62    | 4       | 58      | E    | 1           | 345270.912   | -0.002                     | 573.4643  |
| 63   | 4      | 59     | 62    | 5       | 58      | E    | 1           | 345270.912   | -0.002                     | 573.4643  |
| 63   | 5      | 59     | 62    | 4       | 58      | E    | 1           | 345270.912   | -0.002                     | 573.4643  |
| 63   | 5      | 59     | 62    | 5       | 58      | E    | 1           | 345270.912   | -0.002                     | 573.4643  |
| 54   | 31     | 24     | 54    | 30      | 25      | E    | 0           | 345325.963   | -0.317                     | 544.1252  |
| 63   | 4      | 59     | 62    | 4       | 58      | E    | 0           | 345348.348   | -0.025                     | 445.1863  |
| 63   | 5      | 59     | 62    | 5       | 58      | E    | 0           | 345348.348   | -0.025                     | 445.1863  |
| 63   | 4      | 59     | 62    | 4       | 58      | A    | 0           | 345351.409   | 0.006                      | 445.1810  |
| 63   | 4      | 59     | 62    | 5       | 58      | A    | 0           | 345351.409   | 0.006                      | 445.1810  |
| 63   | 5      | 59     | 62    | 4       | 58      | A    | 0           | 345351.409   | 0.006                      | 445.1810  |
| 63   | 5      | 59     | 62    | 5       | 58      | A    | 0           | 345351.409   | 0.006                      | 445.1810  |
| 57   | 10     | 47     | 56    | 11      | 46      | E    | 1           | 345359.272   | 0.140                      | 551.4334  |
| 64   | 3      | 61     | 63    | 3       | 60      | A    | 1           | 345363.517   | -0.200                     | 575.7409  |
| 64   | 3      | 61     | 63    | 4       | 60      | A    | 1           | 345363.517   | -0.200                     | 575.7409  |
| 64   | 4      | 61     | 63    | 3       | 60      | A    | 1           | 345363.517   | -0.200                     | 575.7409  |
| 64   | 4      | 61     | 63    | 4       | 60      | A    | 1           | 345363.517   | -0.200                     | 575.7409  |
| 54   | 31     | 23     | 54    | 30      | 24      | E    | 0           | 345370.822   | -0.171                     | 544.1289  |
| 57   | 10     | 47     | 56    | 10      | 46      | E    | 1           | 345402.413   | -0.014                     | 551.4320  |



| $J'$ | $K'_a$ | $K'_c$ | $J''$ | $K''_a$ | $K''_c$ | Sym. | $v_{tCH_3}$ | $\nu_{Obs.}$ | $\nu_{Obs.} - \nu_{Calc.}$ | $E_{low}$ |
|------|--------|--------|-------|---------|---------|------|-------------|--------------|----------------------------|-----------|
| 54   | 16     | 39     | 53    | 16      | 38      | A    | 0           | 345409.454   | -0.029                     | 414.5669  |
| 54   | 16     | 39     | 53    | 16      | 38      | E    | 0           | 345420.375   | -0.025                     | 414.5665  |
| 57   | 10     | 47     | 56    | 11      | 46      | E    | 0           | 345424.323   | -0.040                     | 423.1554  |
| 57   | 11     | 47     | 56    | 10      | 46      | E    | 1           | 345427.148   | -0.029                     | 551.4320  |
| 57   | 10     | 47     | 56    | 11      | 46      | A    | 0           | 345430.352   | 0.078                      | 423.1530  |
| 64   | 3      | 61     | 63    | 3       | 60      | E    | 1           | 345445.382   | 0.046                      | 575.5393  |
| 64   | 3      | 61     | 63    | 4       | 60      | E    | 1           | 345445.382   | 0.046                      | 575.5393  |
| 64   | 4      | 61     | 63    | 3       | 60      | E    | 1           | 345445.382   | 0.046                      | 575.5393  |
| 64   | 4      | 61     | 63    | 4       | 60      | E    | 1           | 345445.382   | 0.046                      | 575.5393  |
| 57   | 11     | 47     | 56    | 11      | 46      | E    | 0           | 345447.039   | -0.175                     | 423.1554  |
| 57   | 11     | 47     | 56    | 11      | 46      | A    | 0           | 345453.245   | -0.011                     | 423.1530  |
| 57   | 10     | 47     | 56    | 10      | 46      | E    | 0           | 345464.510   | 0.063                      | 423.1541  |
| 57   | 11     | 47     | 56    | 10      | 46      | E    | 0           | 345487.269   | -0.027                     | 423.1541  |
| 57   | 11     | 47     | 56    | 10      | 46      | A    | 0           | 345493.611   | 0.049                      | 423.1517  |
| 64   | 3      | 61     | 63    | 3       | 60      | E    | 0           | 345524.009   | 0.021                      | 447.2669  |
| 64   | 4      | 61     | 63    | 4       | 60      | E    | 0           | 345524.009   | 0.021                      | 447.2669  |
| 64   | 3      | 61     | 63    | 3       | 60      | A    | 0           | 345526.514   | 0.019                      | 447.2606  |
| 64   | 3      | 61     | 63    | 4       | 60      | A    | 0           | 345526.514   | 0.019                      | 447.2606  |
| 64   | 4      | 61     | 63    | 3       | 60      | A    | 0           | 345526.514   | 0.019                      | 447.2606  |
| 64   | 4      | 61     | 63    | 4       | 60      | A    | 0           | 345526.514   | 0.019                      | 447.2606  |
| 65   | 2      | 63     | 64    | 2       | 62      | A    | 1           | 345570.050   | -0.139                     | 577.4385  |
| 65   | 2      | 63     | 64    | 3       | 62      | A    | 1           | 345570.050   | -0.139                     | 577.4385  |
| 65   | 3      | 63     | 64    | 2       | 62      | A    | 1           | 345570.050   | -0.139                     | 577.4385  |
| 65   | 3      | 63     | 64    | 3       | 62      | A    | 1           | 345570.050   | -0.139                     | 577.4385  |
| 53   | 31     | 23     | 53    | 30      | 24      | A    | 0           | 345583.286   | -0.050                     | 532.9844  |
| 53   | 31     | 22     | 53    | 30      | 23      | A    | 0           | 345583.286   | -0.050                     | 532.9844  |
| 53   | 31     | 22     | 53    | 30      | 23      | E    | 0           | 345618.534   | 0.041                      | 532.9753  |
| 65   | 2      | 63     | 64    | 2       | 62      | E    | 1           | 345632.060   | 0.079                      | 577.1936  |
| 65   | 3      | 63     | 64    | 3       | 62      | E    | 1           | 345632.060   | 0.079                      | 577.1936  |
| 56   | 11     | 45     | 55    | 12      | 44      | E    | 0           | 345682.727   | 0.012                      | 417.6375  |
| 56   | 11     | 45     | 55    | 12      | 44      | A    | 0           | 345687.668   | -0.009                     | 417.6349  |
| 65   | 2      | 63     | 64    | 2       | 62      | E    | 0           | 345712.508   | -0.028                     | 448.9288  |
| 65   | 3      | 63     | 64    | 3       | 62      | E    | 0           | 345712.508   | -0.028                     | 448.9288  |
| 65   | 2      | 63     | 64    | 2       | 62      | A    | 0           | 345714.375   | -0.054                     | 448.9211  |
| 65   | 2      | 63     | 64    | 3       | 62      | A    | 0           | 345714.375   | -0.054                     | 448.9211  |
| 65   | 3      | 63     | 64    | 2       | 62      | A    | 0           | 345714.375   | -0.054                     | 448.9211  |
| 65   | 3      | 63     | 64    | 3       | 62      | A    | 0           | 345714.375   | -0.054                     | 448.9211  |
| 66   | 1      | 65     | 65    | 2       | 64      | A    | 1           | 345787.308   | 0.050                      | 578.7308  |
| 66   | 2      | 65     | 65    | 1       | 64      | A    | 1           | 345787.308   | 0.050                      | 578.7308  |
| 52   | 31     | 22     | 52    | 30      | 23      | A    | 0           | 345816.970   | -0.112                     | 522.0417  |
| 52   | 31     | 21     | 52    | 30      | 22      | A    | 0           | 345816.970   | -0.112                     | 522.0417  |
| 66   | 1      | 65     | 65    | 1       | 64      | E    | 1           | 345825.275   | 0.070                      | 578.4341  |
| 66   | 2      | 65     | 65    | 2       | 64      | E    | 1           | 345825.275   | 0.070                      | 578.4341  |
| 20   | 20     | 0      | 19    | 19      | 0       | E    | 0           | 345838.271   | -0.027                     | 175.0637  |
| 20   | 20     | 0      | 19    | 19      | 1       | A    | 0           | 345885.167   | -0.065                     | 175.0650  |
| 20   | 20     | 1      | 19    | 19      | 0       | A    | 0           | 345885.167   | -0.065                     | 175.0650  |
| 66   | 1      | 65     | 65    | 1       | 64      | E    | 0           | 345908.554   | -0.153                     | 450.1792  |
| 66   | 2      | 65     | 65    | 2       | 64      | E    | 0           | 345908.554   | -0.153                     | 450.1792  |
| 66   | 1      | 65     | 65    | 1       | 64      | A    | 0           | 345910.058   | 0.187                      | 450.1790  |
| 66   | 1      | 65     | 65    | 2       | 64      | A    | 0           | 345910.058   | 0.187                      | 450.1790  |
| 66   | 2      | 65     | 65    | 1       | 64      | A    | 0           | 345910.058   | 0.187                      | 450.1790  |
| 66   | 2      | 65     | 65    | 2       | 64      | A    | 0           | 345910.058   | 0.187                      | 450.1790  |
| 56   | 12     | 45     | 55    | 12      | 44      | E    | 1           | 346001.704   | 0.072                      | 545.9091  |
| 67   | 0      | 67     | 66    | 0       | 66      | A    | 1           | 346012.174   | 0.232                      | 579.6248  |
| 67   | 0      | 67     | 66    | 1       | 66      | A    | 1           | 346012.174   | 0.232                      | 579.6248  |
| 67   | 1      | 67     | 66    | 0       | 66      | A    | 1           | 346012.174   | 0.232                      | 579.6248  |
| 67   | 1      | 67     | 66    | 1       | 66      | A    | 1           | 346012.174   | 0.232                      | 579.6248  |
| 67   | 0      | 67     | 66    | 0       | 66      | E    | 1           | 346021.007   | 0.111                      | 579.2665  |
| 67   | 1      | 67     | 66    | 1       | 66      | E    | 1           | 346021.007   | 0.111                      | 579.2665  |
| 51   | 31     | 21     | 51    | 30      | 22      | E    | 0           | 346028.582   | -0.071                     | 511.2965  |
| 51   | 31     | 21     | 51    | 30      | 22      | A    | 0           | 346037.774   | -0.052                     | 511.3095  |
| 51   | 31     | 20     | 51    | 30      | 21      | A    | 0           | 346037.774   | -0.052                     | 511.3095  |
| 67   | 0      | 67     | 66    | 0       | 66      | A    | 0           | 346108.936   | -0.117                     | 451.0130  |
| 67   | 0      | 67     | 66    | 1       | 66      | A    | 0           | 346108.936   | -0.117                     | 451.0130  |
| 67   | 1      | 67     | 66    | 0       | 66      | A    | 0           | 346108.936   | -0.117                     | 451.0130  |
| 67   | 1      | 67     | 66    | 1       | 66      | A    | 0           | 346108.936   | -0.117                     | 451.0130  |
| 67   | 0      | 67     | 66    | 0       | 66      | E    | 0           | 346108.936   | 0.169                      | 451.0242  |
| 67   | 1      | 67     | 66    | 1       | 66      | E    | 0           | 346108.936   | 0.169                      | 451.0242  |
| 50   | 31     | 20     | 50    | 30      | 21      | E    | 0           | 346236.944   | -0.166                     | 500.7747  |
| 50   | 31     | 20     | 50    | 30      | 21      | A    | 0           | 346246.067   | -0.043                     | 500.7877  |
| 50   | 31     | 19     | 50    | 30      | 20      | A    | 0           | 346246.067   | -0.043                     | 500.7877  |
| 56   | 11     | 45     | 55    | 11      | 44      | E    | 1           | 346266.518   | 0.153                      | 545.8868  |
| 50   | 31     | 19     | 50    | 30      | 20      | E    | 0           | 346281.807   | 0.027                      | 500.7786  |
| 49   | 31     | 19     | 49    | 30      | 20      | E    | 0           | 346433.587   | -0.029                     | 490.4630  |
| 49   | 31     | 19     | 49    | 30      | 20      | A    | 0           | 346442.391   | -0.062                     | 490.4761  |
| 49   | 31     | 18     | 49    | 30      | 19      | A    | 0           | 346442.391   | -0.062                     | 490.4761  |
| 54   | 15     | 40     | 53    | 15      | 39      | A    | 0           | 346474.162   | 0.039                      | 409.5290  |
| 54   | 15     | 40     | 53    | 15      | 39      | E    | 0           | 346478.597   | -0.319                     | 409.5304  |
| 48   | 31     | 18     | 48    | 30      | 19      | E    | 0           | 346618.563   | -0.116                     | 480.3611  |
| 48   | 31     | 18     | 48    | 30      | 19      | A    | 0           | 346627.515   | 0.155                      | 480.3743  |
| 48   | 31     | 17     | 48    | 30      | 18      | A    | 0           | 346627.515   | 0.155                      | 480.3743  |
| 55   | 13     | 43     | 54    | 13      | 42      | E    | 0           | 346635.945   | 0.007                      | 411.4748  |
| 55   | 13     | 43     | 54    | 13      | 42      | A    | 0           | 346641.983   | -0.002                     | 411.4720  |
| 48   | 31     | 17     | 48    | 30      | 18      | E    | 0           | 346663.261   | -0.056                     | 480.3651  |
| 56   | 12     | 45     | 55    | 11      | 44      | E    | 0           | 346680.842   | 0.075                      | 417.6167  |
| 56   | 12     | 45     | 55    | 11      | 44      | A    | 0           | 346690.488   | -0.007                     | 417.6140  |
| 22   | 19     | 3      | 21    | 18      | 3       | E    | 0           | 346703.072   | -0.053                     | 176.4311  |
| 22   | 19     | 4      | 21    | 18      | 4       | E    | 0           | 346728.403   | 0.048                      | 176.4191  |
| 22   | 19     | 4      | 21    | 18      | 3       | A    | 0           | 346750.524   | -0.053                     | 176.4308  |
| 22   | 19     | 3      | 21    | 18      | 4       | A    | 0           | 346750.524   | -0.053                     | 176.4308  |
| 56   | 31     | 26     | 55    | 31      | 25      | A    | 0           | 346765.068   | 0.131                      | 567.0131  |
| 56   | 31     | 25     | 55    | 31      | 24      | A    | 0           | 346765.068   | 0.131                      | 567.0131  |
| 56   | 31     | 25     | 55    | 31      | 24      | E    | 0           | 346765.068   | -0.012                     | 567.0052  |
| 56   | 31     | 26     | 55    | 31      | 25      | E    | 0           | 346766.529   | 0.007                      | 567.0000  |
| 47   | 31     | 17     | 47    | 30      | 18      | E    | 0           | 346792.845   | 0.059                      | 470.4690  |
| 47   | 31     | 17     | 47    | 30      | 18      | A    | 0           | 346801.271   | -0.052                     | 470.4821  |
| 47   | 31     | 16     | 47    | 30      | 17      | A    | 0           | 346801.271   | -0.052                     | 470.4821  |
| 46   | 31     | 16     | 46    | 30      | 17      | E    | 0           | 346956.391   | -0.022                     | 460.7862  |
| 46   | 31     | 16     | 46    | 30      | 17      | A    | 0           | 346964.790   | -0.021                     | 460.7994  |
| 46   | 31     | 15     | 46    | 30      | 16      | A    | 0           | 346964.790   | -0.021                     | 460.7994  |
| 46   | 31     | 15     | 46    | 30      | 16      | E    | 0           | 347001.128   | 0.113                      | 460.7902  |
| 56   | 30     | 26     | 55    | 30      | 25      | A    | 0           | 347041.291   | 0.185                      | 555.5027  |
| 56   | 30     | 27     | 55    | 30      | 26      | A    | 0           | 347041.291   | 0.185                      | 555.5027  |
| 56   | 30     | 26     | 55    | 30      | 25      | E    | 0           | 347041.291   | -0.179                     | 555.4936  |
| 45   | 31     | 15     | 45    | 30      | 16      | E    | 0           | 347110.027   | 0.008                      | 451.3127  |
| 45   | 31     | 15     | 45    | 30      | 16      | A    | 0           | 347118.244   | -0.044                     | 451.3259  |
| 45   | 31     | 14     | 45    | 30      | 15      | A    | 0           | 347118.244   | -0.044                     | 451.3259  |
| 54   | 16     | 38     | 53    | 16      | 37      | A    | 0           | 347217.971   | -0.097                     | 414.6613  |
| 54   | 16     | 38     | 53    | 16      | 37      | E    | 0           | 347226.071   | -0.162                     | 414.6619  |
| 44   | 31     | 14     | 44    | 30      | 15      | A    | 0           | 347262.109   | -0.088                     | 442.0614  |
| 44   | 31     | 13     | 44    | 30      | 14      | A    | 0           | 347262.109   | -0.088                     | 442.0614  |
| 55   | 19     | 37     | 54    | 19      | 36      | A    | 0           | 347294.487   | -0.112                     | 444.0579  |
| 44   | 31     | 13     | 44    | 30      | 14      | E    | 0           | 347298.708   | 0.095                      | 442.0522  |
| 55   | 19     | 37     | 54    | 19      | 36      | E    | 0           | 347304.785   | -0.058                     | 444.0480  |
| 43   | 31     | 13     | 43    | 30      | 14      | E    | 0           | 347388.914   | -0.024                     | 432.9925  |
| 43   | 31     | 13     | 43    | 30      | 14      | A    | 0           | 347396.958   | -0.013                     | 433.0057  |



| $J'$ | $K'_a$ | $K'_c$ | $J''$ | $K''_a$ | $K''_c$ | Sym. | $v_{tCH_3}$ | $\nu_{Obs.}$ | $\nu_{Obs.} - \nu_{Calc.}$ | $E_{low}$ |
|------|--------|--------|-------|---------|---------|------|-------------|--------------|----------------------------|-----------|
| 43   | 31     | 12     | 43    | 30      | 13      | A    | 0           | 347396.958   | -0.013                     | 433.0057  |
| 42   | 31     | 12     | 42    | 30      | 13      | E    | 0           | 347515.117   | 0.015                      | 424.1453  |
| 42   | 31     | 12     | 42    | 30      | 13      | A    | 0           | 347523.037   | 0.010                      | 424.1586  |
| 42   | 31     | 11     | 42    | 30      | 12      | A    | 0           | 347523.037   | 0.010                      | 424.1586  |
| 24   | 18     | 6      | 23    | 17      | 6       | E    | 0           | 347550.691   | -0.050                     | 179.0218  |
| 42   | 12     | 31     | 41    | 11      | 30      | E    | 0           | 347554.030   | -0.097                     | 271.9083  |
| 42   | 31     | 11     | 42    | 30      | 12      | E    | 0           | 347559.760   | 0.138                      | 424.1494  |
| 24   | 18     | 7      | 23    | 17      | 7       | E    | 0           | 347570.907   | -0.146                     | 179.0091  |
| 24   | 18     | 6      | 23    | 17      | 7       | A    | 0           | 347598.050   | -0.003                     | 179.0199  |
| 24   | 18     | 7      | 23    | 17      | 6       | A    | 0           | 347598.050   | -0.003                     | 179.0199  |
| 41   | 31     | 11     | 41    | 30      | 12      | E    | 0           | 347632.958   | 0.011                      | 415.5066  |
| 41   | 31     | 11     | 41    | 30      | 12      | A    | 0           | 347640.758   | -0.014                     | 415.5199  |
| 41   | 31     | 10     | 41    | 30      | 11      | A    | 0           | 347640.758   | -0.014                     | 415.5199  |
| 42   | 12     | 31     | 41    | 11      | 30      | A    | 0           | 347645.804   | 0.391                      | 271.9012  |
| 41   | 31     | 10     | 41    | 30      | 11      | E    | 0           | 347677.453   | 0.007                      | 415.5107  |
| 40   | 31     | 10     | 40    | 30      | 11      | E    | 0           | 347742.833   | -0.037                     | 407.0762  |
| 40   | 31     | 10     | 40    | 30      | 11      | A    | 0           | 347750.535   | -0.064                     | 407.0895  |
| 40   | 31     | 9      | 40    | 30      | 10      | A    | 0           | 347750.535   | -0.064                     | 407.0895  |
| 39   | 31     | 9      | 39    | 30      | 10      | E    | 0           | 347845.285   | 0.035                      | 398.8537  |
| 39   | 31     | 8      | 39    | 30      | 9       | E    | 0           | 347889.701   | -0.002                     | 398.8579  |
| 37   | 12     | 26     | 36    | 11      | 25      | E    | 0           | 347991.265   | 0.038                      | 229.3605  |
| 37   | 31     | 7      | 37    | 30      | 8       | A    | 0           | 348036.294   | -0.045                     | 383.0456  |
| 37   | 31     | 6      | 37    | 30      | 7       | A    | 0           | 348036.294   | -0.045                     | 383.0456  |
| 56   | 27     | 30     | 55    | 27      | 29      | A    | 0           | 348063.947   | -0.088                     | 523.3415  |
| 56   | 27     | 29     | 55    | 27      | 28      | A    | 0           | 348063.947   | -0.088                     | 523.3415  |
| 56   | 27     | 30     | 55    | 27      | 29      | E    | 0           | 348065.357   | 0.074                      | 523.3298  |
| 56   | 27     | 29     | 55    | 27      | 28      | E    | 0           | 348066.734   | 0.162                      | 523.3308  |
| 37   | 31     | 6      | 37    | 30      | 7       | E    | 0           | 348073.232   | -0.032                     | 383.0364  |
| 37   | 12     | 26     | 36    | 11      | 25      | A    | 0           | 348075.740   | -0.041                     | 229.3550  |
| 36   | 31     | 5      | 36    | 30      | 6       | E    | 0           | 348155.122   | -0.053                     | 375.4370  |
| 36   | 12     | 24     | 35    | 11      | 25      | A    | 0           | 348160.538   | -0.046                     | 221.5450  |
| 36   | 12     | 24     | 35    | 11      | 25      | E    | 0           | 348177.209   | -0.075                     | 221.5495  |
| 35   | 31     | 5      | 35    | 30      | 6       | E    | 0           | 348186.462   | -0.138                     | 368.0407  |
| 35   | 31     | 5      | 35    | 30      | 6       | A    | 0           | 348193.896   | -0.048                     | 368.0541  |
| 35   | 31     | 4      | 35    | 30      | 5       | A    | 0           | 348193.896   | -0.048                     | 368.0541  |
| 34   | 31     | 4      | 34    | 30      | 5       | A    | 0           | 348263.894   | 0.001                      | 360.8693  |
| 34   | 31     | 3      | 34    | 30      | 4       | A    | 0           | 348263.894   | 0.001                      | 360.8693  |
| 26   | 17     | 9      | 25    | 16      | 9       | E    | 0           | 348353.227   | -0.059                     | 182.8472  |
| 26   | 17     | 10     | 25    | 16      | 10      | E    | 0           | 348368.295   | -0.017                     | 182.8339  |
| 26   | 17     | 10     | 25    | 16      | 9       | A    | 0           | 348399.781   | -0.012                     | 182.8436  |
| 26   | 17     | 9      | 25    | 16      | 10      | A    | 0           | 348399.781   | -0.012                     | 182.8436  |
| 56   | 26     | 30     | 55    | 26      | 29      | A    | 0           | 348489.463   | -0.062                     | 513.4191  |
| 56   | 26     | 31     | 55    | 26      | 30      | A    | 0           | 348489.463   | -0.062                     | 513.4191  |
| 55   | 18     | 38     | 54    | 18      | 37      | A    | 0           | 348762.854   | -0.014                     | 437.5563  |
| 55   | 18     | 38     | 54    | 18      | 37      | E    | 0           | 348793.926   | -0.041                     | 437.5488  |
| 55   | 18     | 37     | 54    | 18      | 36      | E    | 0           | 348814.118   | -0.074                     | 437.5602  |
| 55   | 18     | 37     | 54    | 18      | 36      | A    | 0           | 348832.229   | -0.039                     | 437.5591  |
| 56   | 12     | 44     | 55    | 13      | 43      | A    | 0           | 348966.394   | -0.152                     | 423.0347  |
| 55   | 12     | 43     | 54    | 12      | 42      | E    | 0           | 348987.750   | -0.029                     | 411.2510  |
| 34   | 13     | 22     | 33    | 12      | 21      | A    | 0           | 348990.943   | -0.030                     | 211.0033  |
| 34   | 13     | 21     | 33    | 12      | 21      | E    | 0           | 349005.236   | -0.025                     | 211.0113  |
| 28   | 16     | 12     | 27    | 15      | 12      | E    | 0           | 349058.988   | -0.066                     | 187.9239  |
| 28   | 16     | 13     | 27    | 15      | 13      | E    | 0           | 349068.396   | -0.025                     | 187.9104  |
| 34   | 13     | 21     | 33    | 12      | 22      | A    | 0           | 349104.030   | 0.034                      | 211.0001  |
| 28   | 16     | 12     | 27    | 15      | 13      | A    | 0           | 349104.030   | -0.052                     | 187.9188  |
| 28   | 16     | 13     | 27    | 15      | 12      | A    | 0           | 349104.030   | -0.052                     | 187.9188  |
| 56   | 24     | 32     | 55    | 24      | 31      | A    | 0           | 349519.800   | -0.138                     | 494.7917  |
| 56   | 24     | 33     | 55    | 24      | 32      | A    | 0           | 349519.800   | -0.138                     | 494.7917  |
| 30   | 15     | 15     | 29    | 14      | 15      | E    | 0           | 349570.810   | 0.020                      | 194.2778  |
| 30   | 15     | 16     | 29    | 14      | 16      | E    | 0           | 349574.073   | 0.022                      | 194.2643  |
| 30   | 15     | 16     | 29    | 14      | 15      | A    | 0           | 349613.614   | -0.037                     | 194.2712  |
| 32   | 14     | 19     | 31    | 13      | 19      | E    | 0           | 349692.765   | 0.001                      | 201.9367  |
| 32   | 14     | 18     | 31    | 13      | 18      | E    | 0           | 349696.268   | -0.035                     | 201.9500  |
| 32   | 14     | 19     | 31    | 13      | 18      | A    | 0           | 349735.329   | -0.110                     | 201.9420  |
| 32   | 14     | 18     | 31    | 13      | 19      | A    | 0           | 349737.044   | -0.106                     | 201.9419  |
| 60   | 8      | 52     | 59    | 8       | 51      | A    | 1           | 349870.360   | -0.004                     | 572.3200  |
| 60   | 8      | 52     | 59    | 9       | 51      | A    | 1           | 349870.360   | 0.029                      | 572.3200  |
| 60   | 9      | 52     | 59    | 8       | 51      | A    | 1           | 349870.360   | -0.021                     | 572.3200  |
| 60   | 9      | 52     | 59    | 9       | 51      | A    | 1           | 349870.360   | 0.012                      | 572.3200  |
| 61   | 7      | 54     | 60    | 7       | 53      | A    | 1           | 349891.198   | -0.054                     | 576.2094  |
| 61   | 7      | 54     | 60    | 8       | 53      | A    | 1           | 349891.198   | -0.054                     | 576.2094  |
| 61   | 8      | 54     | 60    | 7       | 53      | A    | 1           | 349891.198   | -0.055                     | 576.2094  |
| 61   | 8      | 54     | 60    | 8       | 53      | A    | 1           | 349891.198   | -0.054                     | 576.2094  |
| 59   | 9      | 50     | 58    | 10      | 49      | A    | 1           | 349960.985   | 0.068                      | 567.9371  |
| 59   | 10     | 50     | 58    | 9       | 49      | A    | 1           | 349962.301   | -0.067                     | 567.9371  |
| 62   | 6      | 56     | 61    | 6       | 55      | A    | 1           | 349983.452   | -0.105                     | 579.6311  |
| 62   | 6      | 56     | 61    | 7       | 55      | A    | 1           | 349983.452   | -0.105                     | 579.6311  |
| 62   | 7      | 56     | 61    | 6       | 55      | A    | 1           | 349983.452   | -0.105                     | 579.6311  |
| 62   | 7      | 56     | 61    | 7       | 55      | A    | 1           | 349983.452   | -0.105                     | 579.6311  |
| 60   | 8      | 52     | 59    | 8       | 51      | E    | 1           | 350022.122   | -0.093                     | 572.2417  |
| 60   | 8      | 52     | 59    | 9       | 51      | E    | 1           | 350022.122   | -0.052                     | 572.2417  |
| 60   | 9      | 52     | 59    | 8       | 51      | E    | 1           | 350022.122   | -0.115                     | 572.2417  |
| 60   | 9      | 52     | 59    | 9       | 51      | E    | 1           | 350022.122   | -0.074                     | 572.2417  |
| 61   | 7      | 54     | 60    | 7       | 53      | E    | 1           | 350029.384   | -0.033                     | 576.1182  |
| 61   | 7      | 54     | 60    | 8       | 53      | E    | 1           | 350029.384   | -0.032                     | 576.1182  |
| 61   | 8      | 54     | 60    | 7       | 53      | E    | 1           | 350029.384   | -0.034                     | 576.1182  |
| 61   | 8      | 54     | 60    | 8       | 53      | E    | 1           | 350029.384   | -0.032                     | 576.1182  |
| 60   | 8      | 52     | 59    | 8       | 51      | E    | 0           | 350098.023   | 0.073                      | 443.9597  |
| 60   | 9      | 52     | 59    | 9       | 51      | E    | 0           | 350098.023   | 0.091                      | 443.9597  |
| 60   | 8      | 52     | 59    | 8       | 51      | A    | 0           | 350102.606   | -0.057                     | 443.9572  |
| 60   | 8      | 52     | 59    | 9       | 51      | A    | 0           | 350102.606   | -0.019                     | 443.9572  |
| 60   | 9      | 52     | 59    | 8       | 51      | A    | 0           | 350102.606   | -0.077                     | 443.9572  |
| 60   | 9      | 52     | 59    | 9       | 51      | A    | 0           | 350102.606   | -0.039                     | 443.9572  |
| 61   | 7      | 54     | 60    | 7       | 53      | E    | 0           | 350106.719   | 0.027                      | 447.8356  |
| 61   | 8      | 54     | 60    | 8       | 53      | E    | 0           | 350106.719   | 0.028                      | 447.8356  |
| 62   | 6      | 56     | 61    | 6       | 55      | E    | 1           | 350108.932   | 0.015                      | 579.5218  |
| 62   | 6      | 56     | 61    | 7       | 55      | E    | 1           | 350108.932   | 0.015                      | 579.5218  |
| 62   | 7      | 56     | 61    | 6       | 55      | E    | 1           | 350108.932   | 0.015                      | 579.5218  |
| 62   | 7      | 56     | 61    | 7       | 55      | E    | 1           | 350108.932   | 0.015                      | 579.5218  |
| 61   | 7      | 54     | 60    | 7       | 53      | A    | 0           | 350110.950   | -0.023                     | 447.8327  |
| 61   | 7      | 54     | 60    | 8       | 53      | A    | 0           | 350110.950   | -0.022                     | 447.8327  |
| 61   | 8      | 54     | 60    | 7       | 53      | A    | 0           | 350110.950   | -0.024                     | 447.8327  |
| 61   | 8      | 54     | 60    | 8       | 53      | A    | 0           | 350110.950   | -0.023                     | 447.8327  |
| 63   | 5      | 58     | 62    | 5       | 57      | A    | 1           | 350122.563   | -0.254                     | 582.6043  |
| 63   | 5      | 58     | 62    | 6       | 57      | A    | 1           | 350122.563   | -0.254                     | 582.6043  |
| 63   | 6      | 58     | 62    | 5       | 57      | A    | 1           | 350122.563   | -0.254                     | 582.6043  |
| 63   | 6      | 58     | 62    | 6       | 57      | A    | 1           | 350122.563   | -0.254                     | 582.6043  |
| 59   | 9      | 50     | 58    | 10      | 49      | E    | 1           | 350128.975   | 0.058                      | 567.8663  |
| 59   | 10     | 50     | 58    | 9       | 49      | E    | 1           | 350130.586   | -0.109                     | 567.8662  |
| 56   | 23     | 34     | 55    | 23      | 33      | A    | 0           | 350151.706   | -0.096                     | 486.0966  |
| 56   | 23     | 33     | 55    | 23      | 32      | A    | 0           | 350151.706   | -0.097                     | 486.0966  |
| 62   | 6      | 56     | 61    | 6       | 55      | E    | 0           | 350187.003   | 0.009                      | 451.2402  |
| 62   | 7      | 56     | 61    | 7       | 55      | E    | 0           | 350187.003   | 0.009                      | 451.2402  |
| 62   | 6      | 56     | 61    | 6       | 55      | A    | 0           | 350190.860   | -0.012                     | 451.2367  |
| 62   | 6      | 56     | 61    | 7       | 55      | A    | 0           | 350190.860   | -0.012                     | 451.2367  |
| 62   | 7      | 56     | 61    | 6       | 55      | A    | 0           | 350190.860   | -0.012                     | 451.2367  |



| $J'$ | $K'_a$ | $K'_c$ | $J''$ | $K''_a$ | $K''_c$ | Sym. | $v_{tCH_3}$ | $\nu_{Obs.}$ | $\nu_{Obs.} - \nu_{Calc.}$ | $E_{low}$ |
|------|--------|--------|-------|---------|---------|------|-------------|--------------|----------------------------|-----------|
| 62   | 7      | 56     | 61    | 7       | 55      | A    | 0           | 350190.860   | -0.012                     | 451.2367  |
| 59   | 9      | 50     | 58    | 10      | 49      | A    | 0           | 350207.008   | 0.084                      | 439.5841  |
| 59   | 10     | 50     | 58    | 9       | 49      | A    | 0           | 350208.447   | -0.110                     | 439.5841  |
| 58   | 10     | 48     | 57    | 11      | 47      | A    | 1           | 350222.696   | 0.100                      | 563.0232  |
| 63   | 5      | 58     | 62    | 5       | 57      | E    | 1           | 350235.025   | -0.037                     | 582.4715  |
| 63   | 5      | 58     | 62    | 6       | 57      | E    | 1           | 350235.025   | -0.037                     | 582.4715  |
| 63   | 6      | 58     | 62    | 5       | 57      | E    | 1           | 350235.025   | -0.037                     | 582.4715  |
| 63   | 6      | 58     | 62    | 6       | 57      | E    | 1           | 350235.025   | -0.037                     | 582.4715  |
| 58   | 11     | 48     | 57    | 10      | 47      | A    | 1           | 350255.309   | 0.185                      | 563.0226  |
| 64   | 5      | 60     | 63    | 5       | 59      | A    | 1           | 350293.463   | -0.131                     | 585.1438  |
| 64   | 5      | 60     | 63    | 5       | 59      | A    | 1           | 350293.463   | -0.131                     | 585.1438  |
| 64   | 5      | 60     | 63    | 5       | 59      | A    | 1           | 350293.463   | -0.131                     | 585.1438  |
| 64   | 5      | 60     | 63    | 5       | 59      | A    | 1           | 350293.463   | -0.131                     | 585.1438  |
| 63   | 5      | 58     | 62    | 5       | 57      | E    | 0           | 350313.706   | 0.026                      | 454.1921  |
| 63   | 6      | 58     | 62    | 6       | 57      | E    | 0           | 350313.706   | 0.026                      | 454.1921  |
| 63   | 5      | 58     | 62    | 5       | 57      | A    | 0           | 350317.162   | 0.018                      | 454.1879  |
| 63   | 5      | 58     | 62    | 6       | 57      | A    | 0           | 350317.162   | 0.018                      | 454.1879  |
| 63   | 6      | 58     | 62    | 5       | 57      | A    | 0           | 350317.162   | 0.018                      | 454.1879  |
| 63   | 6      | 58     | 62    | 6       | 57      | A    | 0           | 350317.162   | 0.018                      | 454.1879  |
| 64   | 4      | 60     | 63    | 4       | 59      | E    | 1           | 350391.363   | -0.085                     | 584.9813  |
| 64   | 4      | 60     | 63    | 5       | 59      | E    | 1           | 350391.363   | -0.085                     | 584.9813  |
| 64   | 5      | 60     | 63    | 4       | 59      | E    | 1           | 350391.363   | -0.085                     | 584.9813  |
| 64   | 5      | 60     | 63    | 5       | 59      | E    | 1           | 350391.363   | -0.085                     | 584.9813  |
| 58   | 10     | 48     | 57    | 11      | 47      | E    | 1           | 350409.676   | -0.090                     | 562.9542  |
| 58   | 11     | 48     | 57    | 11      | 47      | E    | 1           | 350423.761   | -0.049                     | 562.9542  |
| 58   | 11     | 48     | 57    | 10      | 47      | E    | 1           | 350448.636   | 0.075                      | 562.9534  |
| 64   | 4      | 60     | 63    | 4       | 59      | E    | 0           | 350470.686   | -0.014                     | 456.7058  |
| 64   | 5      | 60     | 63    | 5       | 59      | E    | 0           | 350470.686   | -0.014                     | 456.7058  |
| 64   | 4      | 60     | 63    | 4       | 59      | A    | 0           | 350473.676   | -0.036                     | 456.7007  |
| 64   | 4      | 60     | 63    | 5       | 59      | A    | 0           | 350473.676   | -0.036                     | 456.7007  |
| 64   | 5      | 60     | 63    | 4       | 59      | A    | 0           | 350473.676   | -0.036                     | 456.7007  |
| 64   | 5      | 60     | 63    | 5       | 59      | A    | 0           | 350473.676   | -0.036                     | 456.7007  |
| 58   | 10     | 48     | 57    | 11      | 47      | E    | 0           | 350477.968   | -0.038                     | 434.6783  |
| 58   | 10     | 48     | 57    | 11      | 47      | A    | 0           | 350483.742   | -0.077                     | 434.6761  |
| 53   | 13     | 40     | 52    | 13      | 39      | A    | 0           | 350483.742   | 0.209                      | 391.7966  |
| 65   | 3      | 62     | 64    | 3       | 61      | A    | 1           | 350485.619   | -0.199                     | 587.2610  |
| 65   | 3      | 62     | 64    | 4       | 61      | A    | 1           | 350485.619   | -0.199                     | 587.2610  |
| 65   | 4      | 62     | 64    | 3       | 61      | A    | 1           | 350485.619   | -0.199                     | 587.2610  |
| 65   | 4      | 62     | 64    | 4       | 61      | A    | 1           | 350485.619   | -0.199                     | 587.2610  |
| 58   | 11     | 48     | 57    | 11      | 47      | E    | 0           | 350491.135   | 0.198                      | 434.6783  |
| 58   | 11     | 48     | 57    | 10      | 47      | E    | 0           | 350513.842   | 0.054                      | 434.6775  |
| 58   | 11     | 48     | 57    | 10      | 47      | A    | 0           | 350519.850   | 0.043                      | 434.6753  |
| 65   | 3      | 62     | 64    | 3       | 61      | E    | 1           | 350567.139   | 0.031                      | 587.0621  |
| 65   | 3      | 62     | 64    | 4       | 61      | E    | 1           | 350567.139   | 0.031                      | 587.0621  |
| 65   | 4      | 62     | 64    | 3       | 61      | E    | 1           | 350567.139   | 0.031                      | 587.0621  |
| 65   | 4      | 62     | 64    | 4       | 61      | E    | 1           | 350567.139   | 0.031                      | 587.0621  |
| 65   | 3      | 62     | 64    | 3       | 61      | E    | 0           | 350647.442   | 0.032                      | 458.7924  |
| 65   | 4      | 62     | 64    | 4       | 61      | E    | 0           | 350647.442   | 0.032                      | 458.7924  |
| 65   | 3      | 62     | 64    | 3       | 61      | A    | 0           | 350649.933   | 0.027                      | 458.7861  |
| 65   | 3      | 62     | 64    | 4       | 61      | A    | 0           | 350649.933   | 0.027                      | 458.7861  |
| 65   | 4      | 62     | 64    | 3       | 61      | A    | 0           | 350649.933   | 0.027                      | 458.7861  |
| 65   | 4      | 62     | 64    | 4       | 61      | A    | 0           | 350649.933   | 0.027                      | 458.7861  |
| 38   | 12     | 27     | 37    | 11      | 26      | A    | 0           | 350681.954   | -0.005                     | 237.3245  |
| 66   | 2      | 64     | 65    | 2       | 63      | A    | 1           | 350692.766   | -0.060                     | 588.9654  |
| 66   | 2      | 64     | 65    | 3       | 63      | A    | 1           | 350692.766   | -0.060                     | 588.9654  |
| 66   | 3      | 64     | 65    | 2       | 63      | A    | 1           | 350692.766   | -0.060                     | 588.9654  |
| 66   | 3      | 64     | 65    | 3       | 63      | A    | 1           | 350692.766   | -0.060                     | 588.9654  |
| 66   | 2      | 64     | 65    | 2       | 63      | E    | 1           | 350754.515   | 0.057                      | 588.7226  |
| 66   | 3      | 64     | 65    | 3       | 63      | E    | 1           | 350754.515   | 0.057                      | 588.7226  |
| 66   | 2      | 64     | 65    | 2       | 63      | E    | 0           | 350836.676   | 0.136                      | 460.4605  |
| 66   | 3      | 64     | 65    | 3       | 63      | E    | 0           | 350836.676   | 0.136                      | 460.4605  |
| 57   | 11     | 46     | 56    | 12      | 45      | E    | 0           | 350836.676   | -0.240                     | 429.1807  |
| 66   | 2      | 64     | 65    | 2       | 63      | A    | 0           | 350838.415   | -0.013                     | 460.4529  |
| 66   | 2      | 64     | 65    | 3       | 63      | A    | 0           | 350838.415   | -0.013                     | 460.4529  |
| 66   | 3      | 64     | 65    | 2       | 63      | A    | 0           | 350838.415   | -0.013                     | 460.4529  |
| 66   | 3      | 64     | 65    | 3       | 63      | A    | 0           | 350838.415   | -0.013                     | 460.4529  |
| 57   | 11     | 46     | 56    | 12      | 45      | A    | 0           | 350842.412   | -0.052                     | 429.1784  |
| 37   | 11     | 26     | 36    | 10      | 27      | E    | 0           | 350884.145   | 0.079                      | 225.6261  |
| 56   | 22     | 35     | 55    | 22      | 34      | A    | 0           | 350887.101   | -0.012                     | 477.8230  |
| 67   | 1      | 66     | 66    | 1       | 65      | A    | 1           | 350910.261   | 0.045                      | 590.2650  |
| 67   | 1      | 66     | 66    | 2       | 65      | A    | 1           | 350910.261   | 0.045                      | 590.2650  |
| 67   | 2      | 66     | 66    | 1       | 65      | A    | 1           | 350910.261   | 0.045                      | 590.2650  |
| 67   | 2      | 66     | 66    | 2       | 65      | A    | 1           | 350910.261   | 0.045                      | 590.2650  |
| 67   | 1      | 66     | 66    | 1       | 65      | E    | 1           | 350948.197   | 0.106                      | 589.9696  |
| 67   | 2      | 66     | 66    | 2       | 65      | E    | 1           | 350948.197   | 0.106                      | 589.9696  |
| 53   | 13     | 41     | 52    | 12      | 40      | E    | 0           | 350962.604   | -0.026                     | 388.3787  |
| 67   | 1      | 66     | 66    | 1       | 65      | E    | 0           | 351032.869   | -0.150                     | 461.7175  |
| 67   | 2      | 66     | 66    | 2       | 65      | E    | 0           | 351032.869   | -0.150                     | 461.7175  |
| 67   | 1      | 66     | 66    | 1       | 65      | A    | 0           | 351034.391   | 0.211                      | 461.7083  |
| 67   | 1      | 66     | 66    | 2       | 65      | A    | 0           | 351034.391   | 0.211                      | 461.7083  |
| 67   | 2      | 66     | 66    | 1       | 65      | A    | 0           | 351034.391   | 0.211                      | 461.7083  |
| 67   | 2      | 66     | 66    | 2       | 65      | A    | 0           | 351034.391   | 0.211                      | 461.7083  |
| 55   | 17     | 38     | 54    | 17      | 37      | E    | 0           | 351039.389   | -0.028                     | 431.5829  |
| 55   | 17     | 38     | 54    | 17      | 37      | A    | 0           | 351046.701   | -0.055                     | 431.5831  |
| 57   | 12     | 46     | 56    | 12      | 45      | E    | 0           | 351059.624   | 0.040                      | 429.1807  |
| 55   | 14     | 42     | 54    | 14      | 41      | E    | 0           | 351061.372   | -0.046                     | 416.3311  |
| 57   | 12     | 46     | 56    | 12      | 45      | A    | 0           | 351066.187   | -0.074                     | 429.1784  |
| 68   | 0      | 68     | 67    | 0       | 67      | A    | 1           | 351135.344   | 0.180                      | 591.1665  |
| 68   | 0      | 68     | 67    | 1       | 67      | A    | 1           | 351135.344   | 0.180                      | 591.1665  |
| 68   | 1      | 68     | 67    | 0       | 67      | A    | 1           | 351135.344   | 0.180                      | 591.1665  |
| 68   | 1      | 68     | 67    | 1       | 67      | A    | 1           | 351135.344   | 0.180                      | 591.1665  |
| 68   | 0      | 68     | 67    | 0       | 67      | E    | 1           | 351144.145   | 0.109                      | 590.8085  |
| 68   | 1      | 68     | 67    | 1       | 67      | E    | 1           | 351144.145   | 0.109                      | 590.8085  |
| 57   | 11     | 46     | 56    | 11      | 45      | E    | 0           | 351211.522   | 0.050                      | 429.1682  |
| 57   | 11     | 46     | 56    | 11      | 45      | A    | 0           | 351219.012   | 0.160                      | 429.1658  |
| 68   | 0      | 68     | 67    | 0       | 67      | A    | 0           | 351233.403   | -0.141                     | 462.5580  |
| 68   | 0      | 68     | 67    | 1       | 67      | A    | 0           | 351233.403   | -0.141                     | 462.5580  |
| 68   | 1      | 68     | 67    | 0       | 67      | A    | 0           | 351233.403   | -0.141                     | 462.5580  |
| 68   | 1      | 68     | 67    | 1       | 67      | A    | 0           | 351233.403   | -0.141                     | 462.5580  |
| 68   | 0      | 68     | 67    | 0       | 67      | E    | 0           | 351233.403   | 0.143                      | 462.5691  |
| 68   | 1      | 68     | 67    | 1       | 67      | E    | 0           | 351233.403   | 0.143                      | 462.5691  |
| 70   | 32     | 38     | 70    | 31      | 39      | A    | 0           | 351325.263   | -0.181                     | 762.8072  |
| 70   | 32     | 39     | 70    | 31      | 40      | A    | 0           | 351325.263   | -0.181                     | 762.8072  |
| 57   | 12     | 46     | 56    | 11      | 45      | E    | 0           | 351434.222   | 0.082                      | 429.1682  |
| 57   | 12     | 46     | 56    | 11      | 45      | A    | 0           | 351442.688   | 0.039                      | 429.1658  |
| 54   | 13     | 42     | 53    | 12      | 41      | E    | 0           | 351545.699   | -0.010                     | 399.7485  |
| 54   | 13     | 42     | 53    | 12      | 41      | A    | 0           | 351586.447   | -0.002                     | 399.7443  |
| 57   | 13     | 44     | 56    | 14      | 43      | A    | 0           | 351653.800   | -0.026                     | 439.9350  |
| 57   | 13     | 44     | 56    | 14      | 43      | E    | 0           | 351686.022   | -0.007                     | 439.9373  |
| 56   | 13     | 44     | 55    | 13      | 43      | E    | 0           | 351749.924   | -0.006                     | 423.0373  |
| 56   | 21     | 36     | 55    | 21      | 35      | A    | 0           | 351754.579   | 0.050                      | 469.9801  |
| 56   | 21     | 35     | 55    | 21      | 34      | E    | 0           | 351758.942   | 0.173                      | 469.9776  |
| 53   | 14     | 39     | 52    | 14      | 38      | A    | 0           | 351773.822   | -0.020                     | 394.7804  |
| 53   | 14     | 39     | 52    | 14      | 38      | E    | 0           | 351784.604   | 0.036                      | 394.7855  |
| 52   | 13     | 40     | 51    | 12      | 39      | E    | 0           | 351795.340   | -0.014                     | 377.1386  |
| 69   | 32     | 37     | 69    | 31      | 38      | A    | 0           | 351829.294   | -0.005                     | 748.2593  |



| $J'$ | $K'_a$ | $K'_c$ | $J''$ | $K''_a$ | $K''_c$ | Sym. | $v_{tCH_3}$ | $\nu_{Obs.}$ | $\nu_{Obs.} - \nu_{Calc.}$ | $E_{low}$ |
|------|--------|--------|-------|---------|---------|------|-------------|--------------|----------------------------|-----------|
| 69   | 32     | 38     | 69    | 31      | 39      | A    | 0           | 351829.294   | -0.005                     | 748.2593  |
| 40   | 12     | 29     | 39    | 11      | 28      | E    | 0           | 351944.211   | -0.053                     | 254.0775  |
| 21   | 20     | 1      | 20    | 19      | 1       | E    | 0           | 351983.714   | -0.071                     | 179.1675  |
| 39   | 12     | 28     | 38    | 11      | 27      | E    | 0           | 351988.142   | -0.112                     | 245.5674  |
| 21   | 20     | 2      | 20    | 19      | 2       | E    | 0           | 352013.591   | 0.073                      | 179.1563  |
| 40   | 12     | 29     | 39    | 11      | 28      | A    | 0           | 352025.144   | 0.044                      | 254.0710  |
| 21   | 20     | 1      | 20    | 19      | 2       | A    | 0           | 352030.667   | -0.050                     | 179.1688  |
| 21   | 20     | 2      | 20    | 19      | 1       | A    | 0           | 352030.667   | -0.050                     | 179.1688  |
| 68   | 32     | 36     | 68    | 31      | 37      | A    | 0           | 352310.041   | -0.103                     | 733.9263  |
| 68   | 32     | 37     | 68    | 31      | 38      | A    | 0           | 352310.041   | -0.103                     | 733.9263  |
| 55   | 16     | 40     | 54    | 16      | 39      | A    | 0           | 352316.317   | -0.029                     | 426.0885  |
| 55   | 16     | 40     | 54    | 16      | 39      | E    | 0           | 352325.306   | -0.017                     | 426.0885  |
| 68   | 32     | 36     | 68    | 31      | 37      | E    | 0           | 352344.896   | -0.013                     | 733.9184  |
| 67   | 32     | 35     | 67    | 31      | 36      | A    | 0           | 352768.871   | 0.003                      | 719.8078  |
| 67   | 32     | 36     | 67    | 31      | 37      | A    | 0           | 352768.871   | 0.003                      | 719.8078  |
| 56   | 20     | 37     | 55    | 20      | 36      | A    | 0           | 352795.414   | -0.023                     | 462.5807  |
| 56   | 20     | 36     | 55    | 20      | 35      | A    | 0           | 352797.046   | 0.151                      | 462.5808  |
| 56   | 20     | 36     | 55    | 20      | 35      | E    | 0           | 352800.425   | -0.233                     | 462.5798  |
| 56   | 20     | 37     | 55    | 20      | 36      | E    | 0           | 352801.931   | 0.090                      | 462.5699  |
| 23   | 19     | 4      | 22    | 18      | 4       | E    | 0           | 352845.034   | -0.049                     | 180.9513  |
| 23   | 19     | 5      | 22    | 18      | 5       | E    | 0           | 352870.312   | 0.033                      | 180.9392  |
| 23   | 19     | 5      | 22    | 18      | 4       | A    | 0           | 352892.429   | -0.098                     | 180.9510  |
| 23   | 19     | 4      | 22    | 18      | 5       | A    | 0           | 352892.429   | -0.098                     | 180.9510  |
| 55   | 15     | 41     | 54    | 15      | 40      | A    | 0           | 352956.131   | -0.055                     | 421.0861  |
| 55   | 15     | 41     | 54    | 15      | 40      | E    | 0           | 352959.648   | -0.032                     | 421.0877  |
| 66   | 32     | 34     | 66    | 31      | 35      | A    | 0           | 353206.367   | 0.043                      | 705.9037  |
| 66   | 32     | 35     | 66    | 31      | 36      | A    | 0           | 353206.367   | 0.043                      | 705.9037  |
| 66   | 32     | 34     | 66    | 31      | 35      | E    | 0           | 353241.829   | 0.013                      | 705.8959  |
| 56   | 12     | 44     | 55    | 12      | 43      | E    | 0           | 353329.765   | -0.027                     | 422.8919  |
| 56   | 12     | 44     | 55    | 12      | 43      | A    | 0           | 353341.803   | -0.157                     | 422.8888  |
| 55   | 13     | 43     | 54    | 12      | 42      | E    | 0           | 353345.816   | -0.070                     | 411.2510  |
| 55   | 13     | 43     | 54    | 12      | 42      | A    | 0           | 353377.096   | 0.037                      | 411.2473  |
| 57   | 30     | 27     | 56    | 30      | 26      | A    | 0           | 353385.734   | 0.131                      | 567.0787  |
| 57   | 30     | 28     | 56    | 30      | 27      | A    | 0           | 353385.734   | 0.131                      | 567.0787  |
| 57   | 30     | 27     | 56    | 30      | 26      | E    | 0           | 353385.734   | -0.271                     | 567.0696  |
| 57   | 30     | 28     | 56    | 30      | 27      | E    | 0           | 353387.419   | -0.110                     | 567.0660  |
| 54   | 15     | 39     | 53    | 15      | 38      | A    | 0           | 353609.473   | -0.209                     | 410.0355  |
| 65   | 32     | 33     | 65    | 31      | 34      | A    | 0           | 353623.397   | 0.072                      | 692.2135  |
| 65   | 32     | 34     | 65    | 31      | 35      | A    | 0           | 353623.397   | 0.072                      | 692.2135  |
| 54   | 15     | 39     | 53    | 15      | 38      | E    | 0           | 353627.352   | 0.049                      | 410.0384  |
| 65   | 32     | 33     | 65    | 31      | 34      | E    | 0           | 353659.066   | -0.088                     | 692.2056  |
| 25   | 18     | 7      | 24    | 17      | 7       | E    | 0           | 353672.708   | -0.093                     | 183.9613  |
| 25   | 18     | 8      | 24    | 17      | 8       | E    | 0           | 353702.960   | -0.096                     | 183.9486  |
| 57   | 29     | 29     | 56    | 29      | 28      | A    | 0           | 353708.259   | 0.270                      | 555.9721  |
| 57   | 29     | 28     | 56    | 29      | 27      | E    | 0           | 353708.259   | 0.270                      | 555.9721  |
| 57   | 29     | 28     | 56    | 29      | 27      | E    | 0           | 353708.259   | -0.402                     | 555.9620  |
| 57   | 29     | 29     | 56    | 29      | 28      | E    | 0           | 353710.118   | -0.042                     | 555.9599  |
| 25   | 18     | 7      | 24    | 17      | 8       | A    | 0           | 353730.051   | -0.048                     | 183.9594  |
| 25   | 18     | 8      | 24    | 17      | 7       | A    | 0           | 353730.051   | -0.048                     | 183.9594  |
| 64   | 32     | 32     | 64    | 31      | 33      | A    | 0           | 354020.666   | 0.009                      | 678.7370  |
| 64   | 32     | 33     | 64    | 31      | 34      | A    | 0           | 354020.666   | 0.009                      | 678.7370  |
| 64   | 32     | 32     | 64    | 31      | 33      | E    | 0           | 354056.596   | -0.209                     | 678.7291  |
| 37   | 12     | 25     | 36    | 11      | 26      | E    | 0           | 354300.793   | -0.007                     | 229.1930  |
| 37   | 12     | 25     | 36    | 11      | 26      | A    | 0           | 354306.072   | -0.092                     | 229.1883  |
| 63   | 32     | 32     | 63    | 31      | 33      | E    | 0           | 354392.618   | -0.103                     | 665.4612  |
| 63   | 32     | 31     | 63    | 31      | 32      | A    | 0           | 354399.104   | 0.033                      | 665.4737  |
| 63   | 32     | 32     | 63    | 31      | 33      | A    | 0           | 354399.104   | 0.033                      | 665.4737  |
| 63   | 32     | 31     | 63    | 31      | 32      | E    | 0           | 354435.931   | 0.411                      | 665.4658  |
| 27   | 17     | 10     | 26    | 16      | 10      | E    | 0           | 354464.504   | -0.065                     | 188.2102  |
| 57   | 27     | 31     | 56    | 27      | 30      | A    | 0           | 354466.592   | -0.233                     | 534.9516  |
| 57   | 27     | 30     | 56    | 27      | 29      | A    | 0           | 354466.592   | -0.233                     | 534.9516  |
| 57   | 27     | 31     | 56    | 27      | 30      | E    | 0           | 354468.218   | 0.054                      | 534.9400  |
| 57   | 27     | 30     | 56    | 27      | 29      | E    | 0           | 354469.646   | 0.133                      | 534.9410  |
| 27   | 17     | 11     | 26    | 16      | 11      | E    | 0           | 354479.509   | 0.008                      | 188.1970  |
| 27   | 17     | 11     | 26    | 16      | 10      | A    | 0           | 354511.015   | -0.036                     | 188.2066  |
| 27   | 17     | 10     | 26    | 16      | 11      | A    | 0           | 354511.015   | -0.036                     | 188.2066  |
| 35   | 13     | 23     | 34    | 12      | 22      | A    | 0           | 354519.653   | -0.080                     | 218.1603  |
| 35   | 13     | 22     | 34    | 12      | 22      | E    | 0           | 354573.776   | -0.058                     | 218.1673  |
| 35   | 13     | 23     | 34    | 12      | 23      | E    | 0           | 354605.518   | -0.010                     | 218.1533  |
| 35   | 13     | 22     | 34    | 12      | 23      | A    | 0           | 354744.720   | -0.018                     | 218.1539  |
| 62   | 32     | 31     | 62    | 31      | 32      | E    | 0           | 354753.221   | -0.019                     | 652.4109  |
| 62   | 32     | 30     | 62    | 31      | 31      | E    | 0           | 354796.097   | 0.071                      | 652.4156  |
| 57   | 26     | 31     | 56    | 26      | 30      | A    | 0           | 354917.262   | -0.011                     | 525.0434  |
| 57   | 26     | 32     | 56    | 26      | 31      | A    | 0           | 354917.262   | -0.011                     | 525.0434  |
| 61   | 8      | 53     | 60    | 8       | 52      | A    | 1           | 354971.052   | -0.017                     | 583.9905  |
| 61   | 8      | 53     | 60    | 9       | 52      | A    | 1           | 354971.052   | -0.000                     | 583.9905  |
| 61   | 9      | 53     | 60    | 8       | 52      | A    | 1           | 354971.052   | -0.026                     | 583.9905  |
| 61   | 9      | 53     | 60    | 9       | 52      | A    | 1           | 354971.052   | -0.009                     | 583.9905  |
| 62   | 7      | 55     | 61    | 7       | 54      | A    | 1           | 355001.770   | -0.033                     | 587.8805  |
| 62   | 7      | 55     | 61    | 8       | 54      | A    | 1           | 355001.770   | -0.032                     | 587.8805  |
| 62   | 8      | 55     | 61    | 7       | 54      | A    | 1           | 355001.770   | -0.033                     | 587.8805  |
| 62   | 8      | 55     | 61    | 8       | 54      | A    | 1           | 355001.770   | -0.032                     | 587.8805  |
| 60   | 9      | 51     | 59    | 9       | 50      | A    | 1           | 355044.669   | -0.022                     | 579.6105  |
| 60   | 9      | 51     | 59    | 10      | 50      | A    | 1           | 355044.669   | 0.488                      | 579.6106  |
| 60   | 10     | 51     | 59    | 9       | 50      | A    | 1           | 355044.669   | -0.297                     | 579.6105  |
| 60   | 10     | 51     | 59    | 10      | 50      | A    | 1           | 355044.669   | 0.213                      | 579.6106  |
| 54   | 13     | 41     | 53    | 13      | 40      | E    | 0           | 355092.324   | 0.025                      | 403.4932  |
| 61   | 32     | 30     | 61    | 31      | 31      | E    | 0           | 355096.061   | -0.188                     | 639.5733  |
| 63   | 6      | 57     | 62    | 6       | 56      | A    | 1           | 355099.535   | -0.128                     | 591.3053  |
| 63   | 6      | 57     | 62    | 7       | 56      | A    | 1           | 355099.535   | -0.128                     | 591.3053  |
| 63   | 7      | 57     | 62    | 6       | 56      | A    | 1           | 355099.535   | -0.128                     | 591.3053  |
| 63   | 7      | 57     | 62    | 7       | 56      | A    | 1           | 355099.535   | -0.128                     | 591.3053  |
| 61   | 32     | 29     | 61    | 31      | 30      | A    | 0           | 355102.055   | 0.043                      | 639.5861  |
| 61   | 32     | 30     | 61    | 31      | 31      | A    | 0           | 355102.055   | 0.043                      | 639.5861  |
| 61   | 8      | 53     | 60    | 8       | 52      | E    | 1           | 355120.447   | 0.003                      | 583.9172  |
| 61   | 8      | 53     | 60    | 9       | 52      | E    | 1           | 355120.447   | 0.025                      | 583.9172  |
| 61   | 9      | 53     | 60    | 8       | 52      | E    | 1           | 355120.447   | -0.009                     | 583.9172  |
| 61   | 9      | 53     | 60    | 9       | 52      | E    | 1           | 355120.447   | 0.013                      | 583.9172  |
| 29   | 16     | 13     | 28    | 15      | 13      | E    | 0           | 355130.877   | -0.027                     | 193.7164  |
| 62   | 7      | 55     | 61    | 7       | 54      | E    | 1           | 355138.191   | 0.014                      | 587.7939  |
| 62   | 7      | 55     | 61    | 8       | 54      | E    | 1           | 355138.191   | 0.014                      | 587.7939  |
| 62   | 8      | 55     | 61    | 7       | 54      | E    | 1           | 355138.191   | 0.013                      | 587.7939  |
| 62   | 8      | 55     | 61    | 8       | 54      | E    | 1           | 355138.191   | 0.014                      | 587.7939  |
| 29   | 16     | 14     | 28    | 15      | 14      | E    | 0           | 355140.153   | 0.036                      | 193.7029  |
| 29   | 16     | 13     | 28    | 15      | 14      | A    | 0           | 355175.873   | -0.021                     | 193.7113  |
| 29   | 16     | 14     | 28    | 15      | 13      | A    | 0           | 355175.873   | -0.021                     | 193.7113  |
| 61   | 8      | 53     | 60    | 8       | 52      | E    | 0           | 355198.792   | -0.073                     | 455.6377  |
| 61   | 9      | 53     | 60    | 9       | 52      | E    | 0           | 355198.792   | -0.064                     | 455.6377  |
| 61   | 8      | 53     | 60    | 8       | 52      | A    | 0           | 355203.486   | -0.016                     | 455.6354  |
| 61   | 8      | 53     | 60    | 9       | 52      | A    | 0           | 355203.486   | 0.004                      | 455.6354  |
| 61   | 9      | 53     | 60    | 8       | 52      | A    | 0           | 355203.486   | -0.026                     | 455.6354  |
| 61   | 9      | 53     | 60    | 9       | 52      | A    | 0           | 355203.486   | -0.006                     | 455.6354  |
| 62   | 7      | 55     | 61    | 7       | 54      | E    | 0           | 355217.830   | -0.008                     | 459.5139  |
| 62   | 8      | 55     | 61    | 8       | 54      | E    | 0           | 355217.830   | -0.008                     | 459.5139  |
| 62   | 7      | 55     | 61    | 7       | 54      | A    | 0           | 355222.085   | 0.021                      | 459.5112  |
| 62   | 7      | 55     | 61    | 8       | 54      | A    | 0           | 355222.085   | 0.021                      | 459.5112  |



| $J'$ | $K'_a$ | $K'_c$ | $J''$ | $K''_a$ | $K''_c$ | Sym. | $v_{tCH_3}$ | $\nu_{Obs.}$ | $\nu_{Obs.} - \nu_{Calc.}$ | $E_{low}$ |
|------|--------|--------|-------|---------|---------|------|-------------|--------------|----------------------------|-----------|
| 62   | 8      | 55     | 61    | 7       | 54      | A    | 0           | 355222.085   | 0.020                      | 459.5112  |
| 62   | 8      | 55     | 61    | 8       | 54      | A    | 0           | 355222.085   | 0.021                      | 459.5112  |
| 63   | 6      | 57     | 62    | 6       | 56      | E    | 1           | 355223.691   | -0.052                     | 591.2002  |
| 63   | 6      | 57     | 62    | 7       | 56      | E    | 1           | 355223.691   | -0.052                     | 591.2002  |
| 63   | 7      | 57     | 62    | 6       | 56      | E    | 1           | 355223.691   | -0.052                     | 591.2002  |
| 63   | 7      | 57     | 62    | 7       | 56      | E    | 1           | 355223.691   | -0.052                     | 591.2002  |
| 64   | 5      | 59     | 63    | 5       | 58      | A    | 1           | 355241.953   | -0.105                     | 594.2832  |
| 64   | 5      | 59     | 63    | 6       | 58      | A    | 1           | 355241.953   | -0.105                     | 594.2832  |
| 64   | 6      | 59     | 63    | 5       | 58      | A    | 1           | 355241.953   | -0.105                     | 594.2832  |
| 64   | 6      | 59     | 63    | 6       | 58      | A    | 1           | 355241.953   | -0.105                     | 594.2832  |
| 59   | 10     | 49     | 58    | 11      | 48      | A    | 1           | 355279.055   | 0.173                      | 574.7058  |
| 60   | 9      | 51     | 59    | 9       | 50      | E    | 0           | 355285.161   | -0.057                     | 451.2678  |
| 60   | 10     | 51     | 59    | 10      | 50      | E    | 0           | 355285.161   | 0.205                      | 451.2679  |
| 60   | 9      | 51     | 59    | 9       | 50      | A    | 0           | 355290.242   | -0.095                     | 451.2658  |
| 60   | 9      | 51     | 59    | 10      | 50      | A    | 0           | 355290.242   | 0.481                      | 451.2658  |
| 60   | 10     | 51     | 59    | 9       | 50      | A    | 0           | 355290.242   | -0.406                     | 451.2658  |
| 60   | 10     | 51     | 59    | 10      | 50      | A    | 0           | 355290.242   | 0.169                      | 451.2658  |
| 59   | 11     | 49     | 58    | 10      | 48      | A    | 1           | 355297.322   | 0.136                      | 574.7054  |
| 63   | 6      | 57     | 62    | 6       | 56      | E    | 0           | 355303.984   | 0.009                      | 462.9211  |
| 63   | 7      | 57     | 62    | 7       | 56      | E    | 0           | 355303.984   | 0.009                      | 462.9211  |
| 63   | 6      | 57     | 62    | 6       | 56      | A    | 0           | 355307.831   | 0.018                      | 462.9178  |
| 63   | 6      | 57     | 62    | 7       | 56      | A    | 0           | 355307.831   | 0.018                      | 462.9178  |
| 63   | 7      | 57     | 62    | 6       | 56      | A    | 0           | 355307.831   | 0.018                      | 462.9178  |
| 63   | 7      | 57     | 62    | 7       | 56      | A    | 0           | 355307.831   | 0.018                      | 462.9178  |
| 64   | 5      | 59     | 63    | 5       | 58      | E    | 1           | 355353.424   | 0.004                      | 594.1541  |
| 64   | 5      | 59     | 63    | 6       | 58      | E    | 1           | 355353.424   | 0.004                      | 594.1541  |
| 64   | 6      | 59     | 63    | 5       | 58      | E    | 1           | 355353.424   | 0.004                      | 594.1541  |
| 64   | 6      | 59     | 63    | 6       | 58      | E    | 1           | 355353.424   | 0.004                      | 594.1541  |
| 65   | 4      | 61     | 64    | 4       | 60      | A    | 1           | 355414.268   | -0.305                     | 596.8283  |
| 65   | 4      | 61     | 64    | 5       | 60      | A    | 1           | 355414.268   | -0.305                     | 596.8283  |
| 65   | 5      | 61     | 64    | 4       | 60      | A    | 1           | 355414.268   | -0.305                     | 596.8283  |
| 65   | 5      | 61     | 64    | 5       | 60      | A    | 1           | 355414.268   | -0.305                     | 596.8283  |
| 64   | 5      | 59     | 63    | 5       | 58      | E    | 0           | 355433.966   | -0.033                     | 465.8773  |
| 64   | 6      | 59     | 63    | 6       | 58      | E    | 0           | 355433.966   | -0.033                     | 465.8773  |
| 64   | 5      | 59     | 63    | 5       | 58      | A    | 0           | 355437.458   | 0.022                      | 465.8733  |
| 64   | 5      | 59     | 63    | 6       | 58      | A    | 0           | 355437.458   | 0.022                      | 465.8733  |
| 64   | 6      | 59     | 63    | 5       | 58      | A    | 0           | 355437.458   | 0.022                      | 465.8733  |
| 64   | 6      | 59     | 63    | 6       | 58      | A    | 0           | 355437.458   | 0.022                      | 465.8733  |
| 59   | 10     | 49     | 58    | 11      | 48      | E    | 1           | 355462.065   | -0.071                     | 574.6431  |
| 60   | 32     | 28     | 60    | 31      | 29      | E    | 0           | 355465.173   | 0.005                      | 626.9531  |
| 59   | 11     | 49     | 58    | 11      | 48      | E    | 1           | 355470.101   | 0.050                      | 574.6431  |
| 59   | 10     | 49     | 58    | 10      | 48      | E    | 1           | 355476.073   | -0.108                     | 574.6426  |
| 59   | 11     | 49     | 58    | 10      | 48      | E    | 1           | 355484.216   | 0.120                      | 574.6426  |
| 65   | 4      | 61     | 64    | 4       | 60      | E    | 1           | 355511.609   | -0.250                     | 596.6691  |
| 65   | 4      | 61     | 64    | 5       | 60      | E    | 1           | 355511.609   | -0.250                     | 596.6691  |
| 65   | 5      | 61     | 64    | 4       | 60      | E    | 1           | 355511.609   | -0.250                     | 596.6691  |
| 65   | 5      | 61     | 64    | 5       | 60      | E    | 1           | 355511.609   | -0.250                     | 596.6691  |
| 59   | 10     | 49     | 58    | 11      | 48      | A    | 0           | 355539.405   | 0.059                      | 446.3674  |
| 59   | 11     | 49     | 58    | 11      | 48      | A    | 0           | 355546.597   | -0.061                     | 446.3674  |
| 59   | 10     | 49     | 58    | 10      | 48      | E    | 0           | 355546.597   | 0.015                      | 446.3690  |
| 59   | 10     | 49     | 58    | 10      | 48      | A    | 0           | 355552.307   | -0.047                     | 446.3670  |
| 33   | 14     | 20     | 32    | 13      | 20      | E    | 0           | 355555.897   | 0.018                      | 208.6185  |
| 59   | 11     | 49     | 58    | 10      | 48      | A    | 0           | 355559.758   | 0.093                      | 446.3670  |
| 33   | 14     | 19     | 32    | 13      | 19      | E    | 0           | 355559.758   | -0.124                     | 208.6317  |
| 31   | 15     | 16     | 30    | 14      | 16      | E    | 0           | 355570.075   | -0.067                     | 200.5083  |
| 31   | 15     | 17     | 30    | 14      | 17      | E    | 0           | 355573.080   | -0.059                     | 200.4948  |
| 65   | 4      | 61     | 64    | 5       | 60      | E    | 0           | 355592.921   | 0.011                      | 468.3963  |
| 65   | 5      | 61     | 64    | 4       | 60      | E    | 0           | 355592.921   | 0.011                      | 468.3963  |
| 65   | 4      | 61     | 64    | 4       | 60      | A    | 0           | 355595.933   | 0.029                      | 468.3913  |
| 65   | 4      | 61     | 64    | 5       | 60      | A    | 0           | 355595.933   | 0.029                      | 468.3913  |
| 65   | 5      | 61     | 64    | 4       | 60      | A    | 0           | 355595.933   | 0.029                      | 468.3913  |
| 65   | 5      | 61     | 64    | 5       | 60      | A    | 0           | 355595.933   | 0.029                      | 468.3913  |
| 33   | 14     | 19     | 32    | 13      | 20      | A    | 0           | 355601.746   | -0.007                     | 208.6236  |
| 66   | 3      | 63     | 65    | 3       | 62      | A    | 1           | 355607.602   | -0.141                     | 598.9519  |
| 66   | 3      | 63     | 65    | 4       | 62      | A    | 1           | 355607.602   | -0.141                     | 598.9519  |
| 66   | 4      | 63     | 65    | 3       | 62      | A    | 1           | 355607.602   | -0.141                     | 598.9519  |
| 66   | 4      | 63     | 65    | 4       | 62      | A    | 1           | 355607.602   | -0.141                     | 598.9519  |
| 31   | 15     | 17     | 30    | 14      | 16      | A    | 0           | 355612.926   | -0.006                     | 200.5017  |
| 56   | 18     | 39     | 55    | 18      | 38      | A    | 0           | 355649.851   | -0.082                     | 449.1898  |
| 56   | 18     | 39     | 55    | 18      | 38      | E    | 0           | 355686.326   | -0.037                     | 449.1833  |
| 66   | 3      | 63     | 65    | 3       | 62      | E    | 1           | 355688.741   | 0.033                      | 598.7558  |
| 66   | 3      | 63     | 65    | 4       | 62      | E    | 1           | 355688.741   | 0.033                      | 598.7558  |
| 66   | 4      | 63     | 65    | 3       | 62      | E    | 1           | 355688.741   | 0.033                      | 598.7558  |
| 66   | 4      | 63     | 65    | 4       | 62      | E    | 1           | 355688.741   | 0.033                      | 598.7558  |
| 59   | 32     | 27     | 59    | 31      | 28      | A    | 0           | 355737.465   | -0.155                     | 614.5482  |
| 59   | 32     | 28     | 59    | 31      | 29      | A    | 0           | 355737.465   | -0.155                     | 614.5482  |
| 66   | 3      | 63     | 65    | 3       | 62      | E    | 0           | 355770.677   | 0.014                      | 470.4887  |
| 66   | 4      | 63     | 65    | 4       | 62      | E    | 0           | 355770.677   | 0.014                      | 470.4887  |
| 66   | 3      | 63     | 65    | 3       | 62      | A    | 0           | 355773.210   | 0.062                      | 470.4825  |
| 66   | 4      | 63     | 65    | 4       | 62      | A    | 0           | 355773.210   | 0.062                      | 470.4825  |
| 58   | 12     | 47     | 57    | 12      | 46      | A    | 1           | 355790.886   | 0.143                      | 569.2250  |
| 67   | 2      | 65     | 66    | 2       | 64      | A    | 1           | 355815.198   | -0.069                     | 600.6633  |
| 67   | 2      | 65     | 66    | 3       | 64      | A    | 1           | 355815.198   | -0.069                     | 600.6633  |
| 67   | 3      | 65     | 66    | 2       | 64      | A    | 1           | 355815.198   | -0.069                     | 600.6633  |
| 67   | 3      | 65     | 66    | 3       | 64      | A    | 1           | 355815.198   | -0.069                     | 600.6633  |
| 67   | 2      | 65     | 66    | 2       | 64      | E    | 1           | 355876.833   | 0.090                      | 600.4226  |
| 67   | 2      | 65     | 66    | 3       | 64      | E    | 1           | 355876.833   | 0.090                      | 600.4226  |
| 67   | 3      | 65     | 66    | 2       | 64      | E    | 1           | 355876.833   | 0.090                      | 600.4226  |
| 67   | 3      | 65     | 66    | 3       | 64      | E    | 1           | 355876.833   | 0.090                      | 600.4226  |
| 58   | 11     | 47     | 57    | 12      | 46      | E    | 0           | 355932.983   | 0.051                      | 440.8908  |
| 58   | 11     | 47     | 57    | 12      | 46      | A    | 0           | 355938.724   | -0.047                     | 440.8887  |
| 67   | 2      | 65     | 66    | 2       | 64      | E    | 0           | 355960.434   | 0.081                      | 472.1632  |
| 67   | 3      | 65     | 66    | 3       | 64      | E    | 0           | 355960.434   | 0.081                      | 472.1632  |
| 67   | 2      | 65     | 66    | 2       | 64      | A    | 0           | 355962.187   | -0.049                     | 472.1556  |
| 67   | 2      | 65     | 66    | 3       | 64      | A    | 0           | 355962.187   | -0.049                     | 472.1556  |
| 67   | 3      | 65     | 66    | 2       | 64      | A    | 0           | 355962.187   | -0.049                     | 472.1556  |
| 67   | 3      | 65     | 66    | 3       | 64      | A    | 0           | 355962.187   | -0.049                     | 472.1556  |
| 58   | 12     | 47     | 57    | 12      | 46      | E    | 1           | 356001.141   | 0.045                      | 569.1585  |
| 57   | 24     | 33     | 56    | 24      | 32      | A    | 0           | 356010.111   | 0.012                      | 506.4504  |
| 57   | 24     | 34     | 56    | 24      | 33      | A    | 0           | 356010.111   | 0.012                      | 506.4504  |
| 68   | 1      | 67     | 67    | 1       | 66      | A    | 1           | 356033.057   | 0.083                      | 601.9701  |
| 68   | 1      | 67     | 67    | 2       | 66      | A    | 1           | 356033.057   | 0.083                      | 601.9701  |
| 68   | 2      | 67     | 67    | 1       | 66      | A    | 1           | 356033.057   | 0.083                      | 601.9701  |
| 68   | 2      | 67     | 67    | 2       | 66      | A    | 1           | 356033.057   | 0.083                      | 601.9701  |
| 58   | 12     | 47     | 57    | 12      | 46      | E    | 0           | 356064.113   | 0.074                      | 440.8908  |
| 68   | 1      | 67     | 67    | 1       | 66      | E    | 1           | 356070.839   | 0.060                      | 601.6760  |
| 68   | 2      | 67     | 67    | 2       | 66      | E    | 1           | 356070.839   | 0.060                      | 601.6760  |
| 56   | 13     | 44     | 55    | 12      | 43      | E    | 0           | 356107.992   | -0.045                     | 422.8919  |
| 68   | 1      | 67     | 67    | 1       | 66      | E    | 0           | 356156.988   | -0.145                     | 473.4267  |
| 68   | 2      | 67     | 67    | 2       | 66      | E    | 0           | 356156.988   | -0.145                     | 473.4267  |
| 68   | 1      | 67     | 67    | 1       | 66      | A    | 0           | 356158.488   | 0.196                      | 473.4175  |
| 68   | 1      | 67     | 67    | 2       | 66      | A    | 0           | 356158.488   | 0.196                      | 473.4175  |
| 68   | 2      | 67     | 67    | 1       | 66      | A    | 0           | 356158.488   | 0.196                      | 473.4175  |
| 68   | 2      | 67     | 67    | 2       | 66      | A    | 0           | 356158.488   | 0.196                      | 473.4175  |
| 58   | 11     | 47     | 57    | 11      | 46      | A    | 0           | 356162.453   | -0.115                     | 440.8812  |
| 69   | 0      | 69     | 68    | 0       | 68      | A    | 1           | 356258.416   | 0.228                      | 602.8791  |



| $J'$ | $K'_a$ | $K'_c$ | $J''$ | $K''_a$ | $K''_c$ | Sym. | $v_{tCH_3}$ | $\nu_{Obs.}$ | $\nu_{Obs.} - \nu_{Calc.}$ | $E_{low}$ |
|------|--------|--------|-------|---------|---------|------|-------------|--------------|----------------------------|-----------|
| 69   | 0      | 69     | 68    | 1       | 68      | A    | 1           | 356258.416   | 0.228                      | 602.8791  |
| 69   | 1      | 69     | 68    | 0       | 68      | A    | 1           | 356258.416   | 0.228                      | 602.8791  |
| 69   | 1      | 69     | 68    | 1       | 68      | A    | 1           | 356258.416   | 0.228                      | 602.8791  |
| 69   | 0      | 69     | 68    | 0       | 68      | E    | 1           | 356267.107   | 0.128                      | 602.5214  |
| 69   | 1      | 69     | 68    | 1       | 68      | E    | 1           | 356267.107   | 0.128                      | 602.5214  |
| 58   | 12     | 47     | 57    | 11      | 46      | E    | 0           | 356286.644   | -0.063                     | 440.8834  |
| 58   | 12     | 47     | 57    | 11      | 46      | A    | 0           | 356294.291   | -0.073                     | 440.8812  |
| 57   | 32     | 26     | 57    | 31      | 27      | E    | 0           | 356306.244   | 0.007                      | 590.3449  |
| 57   | 32     | 25     | 57    | 31      | 26      | A    | 0           | 356310.860   | -0.119                     | 590.3579  |
| 57   | 32     | 26     | 57    | 31      | 27      | A    | 0           | 356310.860   | -0.119                     | 590.3579  |
| 69   | 0      | 69     | 68    | 0       | 68      | A    | 0           | 356357.721   | -0.116                     | 474.2739  |
| 69   | 0      | 69     | 68    | 1       | 68      | A    | 0           | 356357.721   | -0.116                     | 474.2739  |
| 69   | 1      | 69     | 68    | 0       | 68      | A    | 0           | 356357.721   | -0.116                     | 474.2739  |
| 69   | 1      | 69     | 68    | 1       | 68      | A    | 0           | 356357.721   | -0.116                     | 474.2739  |
| 69   | 0      | 69     | 68    | 0       | 68      | E    | 0           | 356357.721   | 0.166                      | 474.2850  |
| 69   | 1      | 69     | 68    | 1       | 68      | E    | 0           | 356357.721   | 0.166                      | 474.2850  |
| 56   | 32     | 25     | 56    | 31      | 26      | E    | 0           | 356571.244   | -0.048                     | 578.5669  |
| 56   | 32     | 24     | 56    | 31      | 25      | A    | 0           | 356575.850   | 0.042                      | 578.5800  |
| 56   | 32     | 25     | 56    | 31      | 26      | A    | 0           | 356575.850   | 0.042                      | 578.5800  |
| 56   | 32     | 24     | 56    | 31      | 25      | E    | 0           | 356613.902   | -0.052                     | 578.5720  |
| 57   | 23     | 35     | 56    | 23      | 34      | A    | 0           | 356681.775   | -0.031                     | 497.7764  |
| 57   | 23     | 34     | 56    | 23      | 33      | A    | 0           | 356681.775   | -0.032                     | 497.7764  |
| 57   | 13     | 45     | 56    | 13      | 44      | E    | 0           | 356806.216   | -0.016                     | 434.7704  |
| 57   | 13     | 45     | 56    | 13      | 44      | A    | 0           | 356812.975   | 0.016                      | 434.7680  |
| 55   | 32     | 23     | 55    | 31      | 24      | A    | 0           | 356826.764   | -0.063                     | 567.0131  |
| 55   | 32     | 24     | 55    | 31      | 25      | A    | 0           | 356826.764   | -0.063                     | 567.0131  |
| 54   | 32     | 23     | 54    | 31      | 24      | E    | 0           | 357060.283   | -0.200                     | 555.6440  |
| 54   | 32     | 22     | 54    | 31      | 23      | A    | 0           | 357064.496   | -0.086                     | 555.6572  |
| 54   | 32     | 23     | 54    | 31      | 24      | A    | 0           | 357064.496   | -0.086                     | 555.6572  |
| 54   | 32     | 22     | 54    | 31      | 23      | E    | 0           | 357103.236   | 0.143                      | 555.6492  |
| 53   | 32     | 22     | 53    | 31      | 23      | E    | 0           | 357285.556   | -0.135                     | 544.4986  |
| 53   | 32     | 21     | 53    | 31      | 22      | A    | 0           | 357289.561   | -0.034                     | 544.5118  |
| 53   | 32     | 22     | 53    | 31      | 23      | A    | 0           | 357289.561   | -0.034                     | 544.5118  |
| 53   | 32     | 21     | 53    | 31      | 22      | E    | 0           | 357328.263   | -0.010                     | 544.5039  |
| 57   | 22     | 36     | 56    | 22      | 35      | A    | 0           | 357465.236   | 0.001                      | 489.5273  |
| 57   | 22     | 36     | 56    | 22      | 35      | E    | 0           | 357469.283   | -0.069                     | 489.5152  |
| 52   | 32     | 21     | 52    | 31      | 21      | A    | 0           | 357502.379   | 0.000                      | 533.5769  |
| 52   | 32     | 21     | 52    | 31      | 22      | A    | 0           | 357502.379   | 0.000                      | 533.5769  |
| 56   | 17     | 40     | 55    | 17      | 39      | E    | 0           | 357513.857   | -0.063                     | 443.2528  |
| 56   | 17     | 40     | 55    | 17      | 39      | E    | 0           | 357530.792   | -0.032                     | 443.2507  |
| 51   | 32     | 19     | 51    | 31      | 21      | E    | 0           | 357699.775   | -0.104                     | 522.8388  |
| 51   | 32     | 19     | 51    | 31      | 20      | A    | 0           | 357703.440   | 0.013                      | 522.8521  |
| 51   | 32     | 20     | 51    | 31      | 21      | A    | 0           | 357703.440   | 0.013                      | 522.8521  |
| 50   | 13     | 38     | 49    | 12      | 37      | E    | 0           | 357758.494   | -0.003                     | 355.0648  |
| 50   | 32     | 19     | 50    | 31      | 20      | E    | 0           | 357889.850   | 0.016                      | 512.3239  |
| 50   | 32     | 18     | 50    | 31      | 20      | A    | 0           | 357893.169   | -0.048                     | 512.3373  |
| 50   | 32     | 19     | 50    | 31      | 20      | A    | 0           | 357893.169   | -0.048                     | 512.3373  |
| 50   | 32     | 18     | 50    | 31      | 19      | E    | 0           | 357932.227   | -0.104                     | 512.3293  |
| 49   | 32     | 18     | 49    | 31      | 19      | E    | 0           | 358068.974   | -0.012                     | 502.0188  |
| 49   | 32     | 17     | 49    | 31      | 18      | A    | 0           | 358072.116   | -0.099                     | 502.0321  |
| 49   | 32     | 18     | 49    | 31      | 19      | A    | 0           | 358072.116   | -0.099                     | 502.0321  |
| 49   | 32     | 17     | 49    | 31      | 18      | E    | 0           | 358111.397   | -0.057                     | 502.0242  |
| 22   | 20     | 2      | 21    | 19      | 2       | E    | 0           | 358128.428   | -0.043                     | 183.4782  |
| 22   | 20     | 3      | 21    | 19      | 3       | E    | 0           | 358158.218   | 0.038                      | 183.4670  |
| 22   | 20     | 2      | 21    | 19      | 3       | A    | 0           | 358175.359   | -0.040                     | 183.4795  |
| 22   | 20     | 3      | 21    | 19      | 2       | A    | 0           | 358175.359   | -0.040                     | 183.4795  |
| 48   | 32     | 16     | 48    | 31      | 17      | A    | 0           | 358240.836   | -0.032                     | 491.9365  |
| 48   | 32     | 17     | 48    | 31      | 18      | A    | 0           | 358240.836   | -0.032                     | 491.9365  |
| 48   | 32     | 16     | 48    | 31      | 17      | E    | 0           | 358279.911   | -0.312                     | 491.9285  |
| 56   | 17     | 39     | 55    | 17      | 38      | A    | 0           | 358343.441   | 0.241                      | 443.2927  |
| 56   | 17     | 39     | 55    | 17      | 38      | E    | 0           | 358343.441   | -0.352                     | 443.2923  |
| 57   | 21     | 37     | 56    | 21      | 36      | A    | 0           | 358392.275   | 0.081                      | 481.7134  |
| 47   | 32     | 15     | 47    | 31      | 16      | A    | 0           | 358399.585   | -0.029                     | 482.0502  |
| 47   | 32     | 16     | 47    | 31      | 17      | A    | 0           | 358399.585   | -0.029                     | 482.0502  |
| 47   | 32     | 15     | 47    | 31      | 16      | E    | 0           | 358438.995   | -0.083                     | 482.0422  |
| 46   | 32     | 14     | 46    | 31      | 15      | A    | 0           | 358548.844   | -0.032                     | 472.3729  |
| 46   | 32     | 15     | 46    | 31      | 16      | A    | 0           | 358548.844   | -0.032                     | 472.3729  |
| 46   | 32     | 14     | 46    | 31      | 15      | E    | 0           | 358588.518   | 0.078                      | 472.3649  |
| 50   | 13     | 38     | 49    | 12      | 37      | E    | 1           | 358675.523   | 0.722                      | 483.3066  |
| 45   | 32     | 13     | 45    | 31      | 14      | A    | 0           | 358689.031   | -0.035                     | 462.9045  |
| 45   | 32     | 14     | 45    | 31      | 15      | A    | 0           | 358689.031   | -0.035                     | 462.9045  |
| 45   | 32     | 13     | 45    | 31      | 14      | E    | 0           | 358728.788   | 0.066                      | 462.8965  |
| 44   | 32     | 12     | 44    | 31      | 13      | A    | 0           | 358820.517   | -0.066                     | 453.6448  |
| 44   | 32     | 13     | 44    | 31      | 14      | A    | 0           | 358820.517   | -0.066                     | 453.6448  |
| 43   | 32     | 12     | 43    | 31      | 13      | E    | 0           | 358941.351   | 0.008                      | 444.5801  |
| 43   | 32     | 11     | 43    | 31      | 12      | A    | 0           | 358943.761   | -0.051                     | 444.5936  |
| 43   | 32     | 12     | 43    | 31      | 13      | A    | 0           | 358943.761   | -0.051                     | 444.5936  |
| 24   | 19     | 5      | 23    | 18      | 5       | E    | 0           | 358984.664   | -0.020                     | 185.6791  |
| 24   | 19     | 6      | 23    | 18      | 6       | E    | 0           | 359009.862   | 0.023                      | 185.6670  |
| 24   | 19     | 6      | 23    | 18      | 5       | A    | 0           | 359032.081   | -0.039                     | 185.6788  |
| 24   | 19     | 5      | 23    | 18      | 6       | A    | 0           | 359032.081   | -0.039                     | 185.6788  |
| 42   | 32     | 10     | 42    | 31      | 11      | A    | 0           | 359059.091   | -0.040                     | 435.7507  |
| 42   | 32     | 11     | 42    | 31      | 12      | A    | 0           | 359059.091   | -0.040                     | 435.7507  |
| 56   | 16     | 41     | 55    | 16      | 40      | E    | 0           | 359170.696   | -0.108                     | 437.8408  |
| 54   | 14     | 40     | 53    | 14      | 39      | A    | 0           | 359191.706   | -0.004                     | 406.5143  |
| 54   | 14     | 40     | 53    | 14      | 39      | E    | 0           | 359197.631   | 0.159                      | 406.5197  |
| 41   | 32     | 9      | 41    | 31      | 10      | E    | 0           | 359206.830   | -0.026                     | 427.1080  |
| 55   | 13     | 42     | 54    | 13      | 41      | E    | 0           | 359215.582   | -0.079                     | 415.3378  |
| 55   | 13     | 42     | 54    | 13      | 41      | A    | 0           | 359232.983   | -0.012                     | 415.3326  |
| 40   | 32     | 8      | 40    | 31      | 9       | E    | 0           | 359307.436   | -0.059                     | 418.6812  |
| 39   | 32     | 7      | 39    | 31      | 8       | E    | 0           | 359401.246   | -0.035                     | 410.4622  |
| 58   | 31     | 28     | 57    | 31      | 27      | A    | 0           | 359430.818   | -0.019                     | 590.3579  |
| 58   | 31     | 27     | 57    | 31      | 26      | A    | 0           | 359430.818   | -0.019                     | 590.3579  |
| 58   | 31     | 27     | 57    | 31      | 26      | E    | 0           | 359430.818   | -0.212                     | 590.3500  |
| 58   | 31     | 28     | 57    | 31      | 27      | E    | 0           | 359432.674   | 0.039                      | 590.3449  |
| 57   | 20     | 38     | 56    | 20      | 37      | A    | 0           | 359508.928   | 0.007                      | 474.3487  |
| 57   | 20     | 37     | 56    | 20      | 36      | A    | 0           | 359511.707   | -0.040                     | 474.3488  |
| 57   | 20     | 37     | 56    | 20      | 36      | E    | 0           | 359514.895   | -0.206                     | 474.3480  |
| 57   | 20     | 38     | 56    | 20      | 37      | E    | 0           | 359516.482   | 0.095                      | 474.3381  |
| 57   | 13     | 45     | 56    | 12      | 44      | E    | 0           | 359584.550   | 0.073                      | 434.6777  |
| 26   | 18     | 8      | 25    | 17      | 8       | E    | 0           | 359810.020   | -0.042                     | 189.1096  |
| 26   | 18     | 9      | 25    | 17      | 9       | E    | 0           | 359830.237   | -0.014                     | 189.0969  |
| 26   | 18     | 8      | 25    | 17      | 9       | A    | 0           | 359857.302   | -0.042                     | 189.1076  |
| 26   | 18     | 9      | 25    | 17      | 8       | A    | 0           | 359857.302   | -0.042                     | 189.1076  |
| 36   | 13     | 24     | 35    | 12      | 23      | A    | 0           | 359906.416   | -0.032                     | 225.5443  |
| 36   | 13     | 23     | 35    | 12      | 23      | E    | 0           | 360015.519   | -0.058                     | 225.5502  |
| 62   | 8      | 54     | 61    | 8       | 53      | A    | 1           | 360073.083   | -0.010                     | 595.8310  |
| 62   | 8      | 54     | 61    | 9       | 53      | A    | 1           | 360073.083   | -0.001                     | 595.8310  |
| 62   | 9      | 54     | 61    | 8       | 53      | A    | 1           | 360073.083   | -0.015                     | 595.8310  |
| 62   | 9      | 54     | 61    | 9       | 53      | A    | 1           | 360073.083   | -0.006                     | 595.8310  |
| 63   | 7      | 56     | 62    | 7       | 55      | A    | 1           | 360112.830   | -0.069                     | 599.7221  |
| 63   | 7      | 56     | 62    | 8       | 55      | A    | 1           | 360112.830   | -0.068                     | 599.7221  |
| 63   | 8      | 56     | 62    | 7       | 55      | A    | 1           | 360112.830   | -0.069                     | 599.7221  |
| 63   | 8      | 56     | 62    | 8       | 55      | A    | 1           | 360112.830   | -0.068                     | 599.7221  |
| 61   | 9      | 52     | 60    | 9       | 51      | A    | 1           | 360130.432   | -0.050                     | 591.4536  |
| 61   | 9      | 52     | 60    | 10      | 51      | A    | 1           | 360130.432   | 0.225                      | 591.4536  |



| $J'$ | $K'_a$ | $K'_c$ | $J''$ | $K''_a$ | $K''_c$ | Sym. | $v_{tCH_3}$ | $\nu_{Obs.}$ | $\nu_{Obs.} - \nu_{Calc.}$ | $E_{low}$ |
|------|--------|--------|-------|---------|---------|------|-------------|--------------|----------------------------|-----------|
| 61   | 10     | 52     | 60    | 9       | 51      | A    | 1           | 360130.432   | -0.197                     | 591.4536  |
| 61   | 10     | 52     | 60    | 10      | 51      | A    | 1           | 360130.432   | 0.078                      | 591.4536  |
| 36   | 13     | 24     | 35    | 12      | 24      | E    | 0           | 360146.345   | -0.069                     | 225.5328  |
| 64   | 7      | 58     | 63    | 7       | 57      | A    | 1           | 360215.787   | -0.140                     | 603.1501  |
| 64   | 7      | 58     | 63    | 7       | 57      | A    | 1           | 360215.787   | -0.140                     | 603.1501  |
| 64   | 7      | 58     | 63    | 7       | 57      | A    | 1           | 360215.787   | -0.140                     | 603.1501  |
| 64   | 7      | 58     | 63    | 7       | 57      | A    | 1           | 360215.787   | -0.140                     | 603.1501  |
| 62   | 8      | 54     | 61    | 8       | 53      | E    | 1           | 360220.048   | -0.010                     | 595.7627  |
| 62   | 8      | 54     | 61    | 9       | 53      | E    | 1           | 360220.048   | 0.001                      | 595.7627  |
| 62   | 9      | 54     | 61    | 8       | 53      | E    | 1           | 360220.048   | -0.016                     | 595.7627  |
| 62   | 9      | 54     | 61    | 9       | 53      | E    | 1           | 360220.048   | -0.005                     | 595.7627  |
| 63   | 7      | 56     | 62    | 7       | 55      | E    | 1           | 360247.513   | -0.006                     | 599.6401  |
| 63   | 7      | 56     | 62    | 8       | 55      | E    | 1           | 360247.513   | -0.006                     | 599.6401  |
| 63   | 8      | 56     | 62    | 7       | 55      | E    | 1           | 360247.513   | -0.006                     | 599.6401  |
| 63   | 8      | 56     | 62    | 8       | 55      | E    | 1           | 360247.513   | -0.006                     | 599.6401  |
| 61   | 9      | 52     | 60    | 9       | 51      | E    | 1           | 360291.695   | -0.127                     | 591.3938  |
| 61   | 9      | 52     | 60    | 10      | 51      | E    | 1           | 360291.695   | 0.213                      | 591.3938  |
| 61   | 10     | 52     | 60    | 9       | 51      | E    | 1           | 360291.695   | -0.311                     | 591.3938  |
| 61   | 10     | 52     | 60    | 10      | 51      | E    | 1           | 360291.695   | 0.030                      | 591.3938  |
| 62   | 8      | 54     | 61    | 8       | 53      | E    | 0           | 360301.143   | -0.005                     | 467.4859  |
| 62   | 9      | 54     | 61    | 9       | 53      | E    | 0           | 360301.143   | -0.000                     | 467.4859  |
| 62   | 8      | 54     | 61    | 8       | 53      | A    | 0           | 360305.718   | 0.007                      | 467.4837  |
| 62   | 8      | 54     | 61    | 9       | 53      | A    | 0           | 360305.718   | 0.018                      | 467.4837  |
| 62   | 9      | 54     | 61    | 8       | 53      | A    | 0           | 360305.718   | 0.002                      | 467.4837  |
| 62   | 9      | 54     | 61    | 9       | 53      | A    | 0           | 360305.718   | 0.012                      | 467.4837  |
| 63   | 7      | 56     | 62    | 7       | 55      | E    | 0           | 360329.569   | 0.009                      | 471.3627  |
| 63   | 8      | 56     | 62    | 8       | 55      | E    | 0           | 360329.569   | 0.009                      | 471.3627  |
| 63   | 7      | 56     | 62    | 7       | 55      | A    | 0           | 360333.633   | -0.099                     | 471.3601  |
| 63   | 7      | 56     | 62    | 8       | 55      | A    | 0           | 360333.633   | -0.099                     | 471.3601  |
| 63   | 8      | 56     | 62    | 7       | 55      | A    | 0           | 360333.633   | -0.100                     | 471.3601  |
| 63   | 8      | 56     | 62    | 8       | 55      | A    | 0           | 360333.633   | -0.099                     | 471.3601  |
| 64   | 6      | 58     | 63    | 6       | 57      | E    | 1           | 360338.735   | -0.011                     | 603.0492  |
| 64   | 6      | 58     | 63    | 7       | 57      | E    | 1           | 360338.735   | -0.011                     | 603.0492  |
| 64   | 7      | 58     | 63    | 6       | 57      | E    | 1           | 360338.735   | -0.011                     | 603.0492  |
| 64   | 7      | 58     | 63    | 7       | 57      | E    | 1           | 360338.735   | -0.011                     | 603.0492  |
| 36   | 13     | 23     | 35    | 12      | 24      | A    | 0           | 360341.375   | -0.119                     | 225.5321  |
| 60   | 10     | 50     | 59    | 10      | 49      | A    | 1           | 360345.395   | 0.206                      | 586.5566  |
| 60   | 11     | 50     | 59    | 10      | 49      | A    | 1           | 360348.997   | 0.149                      | 586.5566  |
| 65   | 5      | 60     | 64    | 5       | 59      | A    | 1           | 360361.096   | -0.161                     | 606.1328  |
| 65   | 5      | 60     | 64    | 6       | 59      | A    | 1           | 360361.096   | -0.161                     | 606.1328  |
| 65   | 6      | 60     | 64    | 5       | 59      | A    | 1           | 360361.096   | -0.161                     | 606.1328  |
| 65   | 6      | 60     | 64    | 6       | 59      | A    | 1           | 360361.096   | -0.161                     | 606.1328  |
| 61   | 9      | 52     | 60    | 9       | 51      | E    | 0           | 360370.644   | -0.088                     | 463.1189  |
| 61   | 10     | 52     | 60    | 10      | 51      | E    | 0           | 360370.644   | 0.055                      | 463.1189  |
| 61   | 9      | 52     | 60    | 9       | 51      | A    | 0           | 360375.680   | -0.066                     | 463.1170  |
| 61   | 9      | 52     | 60    | 10      | 51      | A    | 0           | 360375.680   | 0.245                      | 463.1170  |
| 61   | 10     | 52     | 60    | 9       | 51      | A    | 0           | 360375.680   | -0.234                     | 463.1170  |
| 61   | 10     | 52     | 60    | 10      | 51      | A    | 0           | 360375.680   | 0.077                      | 463.1170  |
| 58   | 13     | 45     | 57    | 14      | 44      | A    | 0           | 360412.995   | -0.046                     | 452.0118  |
| 64   | 6      | 58     | 63    | 6       | 57      | E    | 0           | 360421.159   | 0.027                      | 474.7728  |
| 64   | 6      | 58     | 63    | 7       | 57      | E    | 0           | 360421.159   | 0.027                      | 474.7728  |
| 64   | 6      | 58     | 63    | 6       | 57      | A    | 0           | 360424.945   | 0.014                      | 474.7696  |
| 64   | 6      | 58     | 63    | 7       | 57      | A    | 0           | 360424.945   | 0.014                      | 474.7696  |
| 64   | 7      | 58     | 63    | 6       | 57      | A    | 0           | 360424.945   | 0.014                      | 474.7696  |
| 64   | 7      | 58     | 63    | 7       | 57      | A    | 0           | 360424.945   | 0.014                      | 474.7696  |
| 58   | 13     | 45     | 57    | 14      | 44      | E    | 0           | 360433.672   | -0.111                     | 452.0140  |
| 65   | 5      | 60     | 64    | 5       | 59      | E    | 1           | 360471.794   | 0.045                      | 606.0074  |
| 65   | 5      | 60     | 64    | 6       | 59      | E    | 1           | 360471.794   | 0.045                      | 606.0074  |
| 65   | 6      | 60     | 64    | 5       | 59      | E    | 1           | 360471.794   | 0.045                      | 606.0074  |
| 65   | 6      | 60     | 64    | 6       | 59      | E    | 1           | 360471.794   | 0.045                      | 606.0074  |
| 60   | 10     | 50     | 59    | 11      | 49      | E    | 1           | 360517.485   | -0.248                     | 586.5003  |
| 60   | 11     | 50     | 59    | 11      | 49      | E    | 1           | 360522.282   | 0.117                      | 586.5003  |
| 60   | 10     | 50     | 59    | 10      | 49      | E    | 1           | 360525.865   | 0.216                      | 586.5000  |
| 60   | 11     | 50     | 59    | 10      | 49      | E    | 1           | 360530.077   | -0.004                     | 586.5000  |
| 66   | 4      | 62     | 65    | 4       | 61      | A    | 1           | 360535.392   | -0.024                     | 608.6837  |
| 66   | 4      | 62     | 65    | 5       | 61      | A    | 1           | 360535.392   | -0.024                     | 608.6837  |
| 66   | 5      | 62     | 65    | 4       | 61      | A    | 1           | 360535.392   | -0.024                     | 608.6837  |
| 66   | 5      | 62     | 65    | 5       | 61      | A    | 1           | 360535.392   | -0.024                     | 608.6837  |
| 65   | 5      | 60     | 64    | 5       | 59      | E    | 0           | 360554.296   | 0.003                      | 477.7333  |
| 65   | 6      | 60     | 64    | 6       | 59      | E    | 0           | 360554.296   | 0.003                      | 477.7333  |
| 65   | 5      | 60     | 64    | 5       | 59      | A    | 0           | 360557.749   | 0.046                      | 477.7294  |
| 65   | 5      | 60     | 64    | 6       | 59      | A    | 0           | 360557.749   | 0.046                      | 477.7294  |
| 65   | 6      | 60     | 64    | 5       | 59      | A    | 0           | 360557.749   | 0.046                      | 477.7294  |
| 65   | 6      | 60     | 64    | 6       | 59      | A    | 0           | 360557.749   | 0.046                      | 477.7294  |
| 28   | 17     | 11     | 27    | 16      | 11      | E    | 0           | 360567.175   | -0.054                     | 193.7834  |
| 60   | 11     | 50     | 59    | 10      | 49      | A    | 0           | 360609.531   | -0.082                     | 458.2269  |
| 28   | 17     | 12     | 27    | 16      | 11      | A    | 0           | 360613.624   | -0.059                     | 193.7798  |
| 28   | 17     | 11     | 27    | 16      | 12      | A    | 0           | 360613.624   | -0.059                     | 193.7798  |
| 66   | 4      | 62     | 65    | 4       | 61      | E    | 1           | 360632.213   | 0.071                      | 608.5277  |
| 66   | 4      | 62     | 65    | 5       | 61      | E    | 1           | 360632.213   | 0.071                      | 608.5277  |
| 66   | 5      | 62     | 65    | 4       | 61      | E    | 1           | 360632.213   | 0.071                      | 608.5277  |
| 66   | 5      | 62     | 65    | 5       | 61      | E    | 1           | 360632.213   | 0.071                      | 608.5277  |
| 66   | 4      | 62     | 65    | 4       | 61      | E    | 0           | 360715.017   | 0.026                      | 480.2576  |
| 66   | 5      | 62     | 65    | 5       | 61      | E    | 0           | 360715.017   | 0.026                      | 480.2576  |
| 66   | 4      | 62     | 65    | 4       | 61      | A    | 0           | 360718.004   | 0.036                      | 480.2527  |
| 66   | 4      | 62     | 65    | 5       | 61      | A    | 0           | 360718.004   | 0.036                      | 480.2527  |
| 66   | 5      | 62     | 65    | 4       | 61      | A    | 0           | 360718.004   | 0.036                      | 480.2527  |
| 66   | 5      | 62     | 65    | 5       | 61      | A    | 0           | 360718.004   | 0.036                      | 480.2527  |
| 67   | 3      | 64     | 66    | 3       | 63      | A    | 1           | 360729.381   | -0.106                     | 610.8137  |
| 67   | 3      | 64     | 66    | 4       | 63      | A    | 1           | 360729.381   | -0.106                     | 610.8137  |
| 67   | 4      | 64     | 66    | 3       | 63      | A    | 1           | 360729.381   | -0.106                     | 610.8137  |
| 67   | 4      | 64     | 66    | 4       | 63      | A    | 1           | 360729.381   | -0.106                     | 610.8137  |
| 59   | 11     | 48     | 58    | 12      | 47      | A    | 1           | 360732.048   | 0.195                      | 581.0929  |
| 58   | 12     | 46     | 57    | 13      | 45      | E    | 0           | 360746.826   | 0.049                      | 446.6722  |
| 58   | 12     | 46     | 57    | 13      | 45      | A    | 0           | 360748.529   | -0.161                     | 446.6700  |
| 67   | 3      | 64     | 66    | 3       | 63      | E    | 1           | 360810.144   | 0.014                      | 610.6203  |
| 67   | 3      | 64     | 66    | 4       | 63      | E    | 1           | 360810.144   | 0.014                      | 610.6203  |
| 67   | 4      | 64     | 66    | 3       | 63      | E    | 1           | 360810.144   | 0.014                      | 610.6203  |
| 67   | 4      | 64     | 66    | 4       | 63      | E    | 1           | 360810.144   | 0.014                      | 610.6203  |
| 67   | 3      | 64     | 66    | 3       | 63      | E    | 0           | 360893.758   | 0.018                      | 482.3559  |
| 67   | 4      | 64     | 66    | 4       | 63      | E    | 0           | 360893.758   | 0.018                      | 482.3559  |
| 67   | 3      | 64     | 66    | 4       | 63      | A    | 0           | 360896.230   | 0.015                      | 482.3499  |
| 67   | 4      | 64     | 66    | 3       | 63      | A    | 0           | 360896.230   | 0.015                      | 482.3499  |
| 59   | 11     | 48     | 58    | 12      | 47      | E    | 1           | 360924.165   | 0.193                      | 581.0335  |
| 38   | 12     | 26     | 37    | 11      | 27      | E    | 0           | 360935.960   | -0.207                     | 237.0590  |
| 68   | 2      | 66     | 67    | 2       | 65      | A    | 1           | 360937.524   | 0.014                      | 612.5320  |
| 68   | 2      | 66     | 67    | 3       | 65      | A    | 1           | 360937.524   | 0.014                      | 612.5320  |
| 68   | 3      | 66     | 67    | 2       | 65      | A    | 1           | 360937.524   | 0.014                      | 612.5320  |
| 68   | 3      | 66     | 67    | 3       | 65      | A    | 1           | 360937.524   | 0.014                      | 612.5320  |
| 38   | 12     | 26     | 37    | 11      | 27      | A    | 0           | 360951.508   | 0.090                      | 237.0542  |
| 59   | 11     | 48     | 58    | 12      | 47      | E    | 0           | 360997.198   | 0.048                      | 452.7678  |
| 68   | 2      | 66     | 67    | 2       | 65      | E    | 1           | 360998.872   | 0.039                      | 612.2933  |
| 68   | 2      | 66     | 67    | 3       | 65      | E    | 1           | 360998.872   | 0.039                      | 612.2933  |
| 68   | 3      | 66     | 67    | 2       | 65      | E    | 1           | 360998.872   | 0.039                      | 612.2933  |
| 68   | 3      | 66     | 67    | 3       | 65      | E    | 1           | 360998.872   | 0.039                      | 612.2933  |
| 59   | 11     | 48     | 58    | 12      | 47      | A    | 0           | 361003.098   | 0.003                      | 452.7659  |



| $J'$ | $K'_a$ | $K'_c$ | $J''$ | $K''_a$ | $K''_c$ | Sym. | $v_{tCH_3}$ | $\nu_{Obs.}$ | $\nu_{Obs.} - \nu_{Calc.}$ | $E_{low}$ |
|------|--------|--------|-------|---------|---------|------|-------------|--------------|----------------------------|-----------|
| 59   | 12     | 48     | 58    | 12      | 47      | E    | 1           | 361006.738   | 0.085                      | 581.0335  |
| 59   | 12     | 48     | 58    | 12      | 47      | E    | 0           | 361073.458   | -0.206                     | 452.7678  |
| 68   | 2      | 66     | 67    | 2       | 65      | E    | 0           | 361084.043   | 0.073                      | 484.0367  |
| 68   | 3      | 66     | 67    | 3       | 65      | E    | 0           | 361084.043   | 0.073                      | 484.0367  |
| 68   | 2      | 66     | 67    | 2       | 65      | A    | 0           | 361085.807   | -0.041                     | 484.0293  |
| 68   | 2      | 66     | 67    | 3       | 65      | A    | 0           | 361085.807   | -0.041                     | 484.0293  |
| 68   | 3      | 66     | 67    | 2       | 65      | A    | 0           | 361085.807   | -0.041                     | 484.0293  |
| 68   | 3      | 66     | 67    | 3       | 65      | A    | 0           | 361085.807   | -0.041                     | 484.0293  |
| 59   | 11     | 48     | 58    | 11      | 47      | A    | 0           | 361134.798   | -0.093                     | 452.7615  |
| 59   | 12     | 48     | 58    | 11      | 47      | E    | 1           | 361147.941   | 0.011                      | 581.0287  |
| 69   | 1      | 68     | 68    | 1       | 67      | A    | 1           | 361155.479   | -0.050                     | 613.8461  |
| 69   | 1      | 68     | 68    | 2       | 67      | A    | 1           | 361155.479   | -0.050                     | 613.8461  |
| 69   | 2      | 68     | 68    | 1       | 67      | A    | 1           | 361155.479   | -0.050                     | 613.8461  |
| 69   | 2      | 68     | 68    | 2       | 67      | A    | 1           | 361155.479   | -0.050                     | 613.8461  |
| 30   | 16     | 14     | 29    | 15      | 14      | E    | 0           | 361187.935   | -0.071                     | 199.7210  |
| 69   | 1      | 68     | 68    | 1       | 67      | E    | 1           | 361193.278   | 0.012                      | 613.5532  |
| 69   | 1      | 68     | 68    | 2       | 67      | E    | 1           | 361193.278   | 0.012                      | 613.5532  |
| 69   | 2      | 68     | 68    | 1       | 67      | E    | 1           | 361193.278   | 0.012                      | 613.5532  |
| 69   | 2      | 68     | 68    | 2       | 67      | E    | 1           | 361193.278   | 0.012                      | 613.5532  |
| 30   | 16     | 15     | 29    | 15      | 15      | E    | 0           | 361197.095   | 0.052                      | 199.7075  |
| 59   | 12     | 48     | 58    | 11      | 47      | E    | 0           | 361204.703   | -0.068                     | 452.7634  |
| 59   | 12     | 48     | 58    | 11      | 47      | A    | 0           | 361211.845   | 0.024                      | 452.7615  |
| 30   | 16     | 14     | 29    | 15      | 15      | A    | 0           | 361232.928   | -0.027                     | 199.7158  |
| 30   | 16     | 15     | 29    | 15      | 14      | A    | 0           | 361232.928   | -0.026                     | 199.7158  |
| 69   | 1      | 68     | 68    | 1       | 67      | A    | 0           | 361282.393   | 0.190                      | 485.2977  |
| 69   | 1      | 68     | 68    | 2       | 67      | A    | 0           | 361282.393   | 0.190                      | 485.2977  |
| 69   | 2      | 68     | 68    | 1       | 67      | A    | 0           | 361282.393   | 0.190                      | 485.2977  |
| 69   | 2      | 68     | 68    | 2       | 67      | A    | 0           | 361282.393   | 0.190                      | 485.2977  |
| 34   | 14     | 21     | 33    | 13      | 21      | E    | 0           | 361374.162   | 0.022                      | 215.5192  |
| 34   | 14     | 20     | 33    | 13      | 20      | E    | 0           | 361378.559   | -0.069                     | 215.5323  |
| 70   | 0      | 70     | 69    | 0       | 69      | A    | 1           | 361381.267   | 0.256                      | 614.7626  |
| 70   | 0      | 70     | 69    | 1       | 69      | A    | 1           | 361381.267   | 0.256                      | 614.7626  |
| 70   | 1      | 70     | 69    | 0       | 69      | A    | 1           | 361381.267   | 0.256                      | 614.7626  |
| 70   | 1      | 70     | 69    | 1       | 69      | A    | 1           | 361381.267   | 0.256                      | 614.7626  |
| 70   | 0      | 70     | 69    | 0       | 69      | E    | 1           | 361389.842   | 0.121                      | 614.4052  |
| 70   | 1      | 70     | 69    | 1       | 69      | E    | 1           | 361389.842   | 0.121                      | 614.4052  |
| 34   | 14     | 21     | 33    | 13      | 20      | A    | 0           | 361414.007   | -0.061                     | 215.5243  |
| 34   | 14     | 20     | 33    | 13      | 21      | A    | 0           | 361422.892   | 0.048                      | 215.5241  |
| 70   | 0      | 70     | 69    | 0       | 69      | A    | 0           | 361481.825   | -0.103                     | 486.1607  |
| 70   | 0      | 70     | 69    | 1       | 69      | A    | 0           | 361481.825   | -0.103                     | 486.1607  |
| 70   | 1      | 70     | 69    | 0       | 69      | A    | 0           | 361481.825   | -0.103                     | 486.1607  |
| 70   | 1      | 70     | 69    | 1       | 69      | A    | 0           | 361481.825   | -0.103                     | 486.1607  |
| 58   | 13     | 46     | 57    | 13      | 45      | A    | 1           | 361540.266   | 0.326                      | 574.9984  |
| 32   | 15     | 17     | 31    | 14      | 17      | E    | 0           | 361544.303   | -0.073                     | 206.9537  |
| 32   | 15     | 18     | 31    | 14      | 18      | E    | 0           | 361547.091   | 0.015                      | 206.9402  |
| 32   | 15     | 18     | 31    | 14      | 17      | A    | 0           | 361587.088   | 0.015                      | 206.9470  |
| 58   | 13     | 46     | 57    | 13      | 45      | E    | 1           | 361762.912   | 0.183                      | 574.9299  |
| 58   | 13     | 46     | 57    | 13      | 45      | E    | 0           | 361825.136   | 0.070                      | 446.6722  |
| 58   | 13     | 46     | 57    | 13      | 45      | A    | 0           | 361831.880   | -0.022                     | 446.6700  |
| 58   | 25     | 34     | 57    | 25      | 33      | A    | 0           | 361897.478   | -0.033                     | 527.3972  |
| 58   | 25     | 33     | 57    | 25      | 32      | A    | 0           | 361897.478   | -0.033                     | 527.3972  |
| 55   | 15     | 40     | 54    | 15      | 39      | A    | 0           | 362218.547   | -0.090                     | 421.8307  |
| 55   | 15     | 40     | 54    | 15      | 39      | E    | 0           | 362236.009   | -0.049                     | 421.8342  |
| 49   | 13     | 37     | 48    | 12      | 36      | E    | 0           | 362424.521   | -0.032                     | 344.2577  |
| 58   | 12     | 46     | 57    | 12      | 45      | E    | 0           | 362489.750   | 0.006                      | 446.6141  |
| 58   | 12     | 46     | 57    | 12      | 45      | A    | 0           | 362499.385   | 0.100                      | 446.6116  |
| 58   | 24     | 34     | 57    | 24      | 33      | A    | 0           | 362515.483   | -0.076                     | 518.3256  |
| 58   | 24     | 35     | 57    | 24      | 34      | A    | 0           | 362515.483   | -0.076                     | 518.3256  |
| 57   | 18     | 40     | 56    | 18      | 39      | A    | 0           | 362574.838   | -0.095                     | 461.0530  |
| 57   | 18     | 40     | 56    | 18      | 39      | E    | 0           | 362609.390   | -0.100                     | 461.0477  |
| 57   | 18     | 39     | 56    | 18      | 38      | A    | 0           | 362786.721   | 0.062                      | 461.0621  |
| 56   | 13     | 43     | 55    | 13      | 42      | E    | 0           | 363069.941   | 0.021                      | 427.3199  |
| 56   | 13     | 43     | 55    | 13      | 42      | A    | 0           | 363088.120   | -0.025                     | 427.3153  |
| 58   | 23     | 36     | 57    | 23      | 35      | A    | 0           | 363229.430   | 0.001                      | 509.6741  |
| 56   | 16     | 40     | 55    | 16      | 39      | A    | 0           | 363258.775   | -0.075                     | 438.0877  |
| 56   | 16     | 40     | 55    | 16      | 39      | E    | 0           | 363274.200   | -0.016                     | 438.0889  |
| 21   | 21     | 0      | 20    | 20      | 0       | E    | 0           | 363407.292   | -0.053                     | 186.5997  |
| 21   | 21     | 1      | 20    | 20      | 1       | E    | 0           | 363441.204   | 0.053                      | 186.5894  |
| 21   | 21     | 1      | 20    | 20      | 0       | A    | 0           | 363453.070   | -0.052                     | 186.6025  |
| 21   | 21     | 0      | 20    | 20      | 1       | A    | 0           | 363453.070   | -0.052                     | 186.6025  |
| 70   | 33     | 38     | 70    | 32      | 39      | A    | 0           | 363538.152   | 0.025                      | 774.5262  |
| 70   | 33     | 37     | 70    | 32      | 38      | A    | 0           | 363538.152   | 0.025                      | 774.5262  |
| 58   | 13     | 46     | 57    | 12      | 45      | E    | 0           | 363568.015   | -0.018                     | 446.6141  |
| 70   | 33     | 37     | 70    | 32      | 38      | E    | 0           | 363575.896   | 0.194                      | 774.5195  |
| 58   | 13     | 46     | 57    | 12      | 45      | A    | 0           | 363582.463   | -0.034                     | 446.6116  |
| 58   | 22     | 37     | 57    | 22      | 36      | A    | 0           | 364063.969   | -0.088                     | 501.4511  |
| 23   | 20     | 3      | 22    | 19      | 3       | E    | 0           | 364271.894   | -0.052                     | 187.9959  |
| 23   | 20     | 4      | 22    | 19      | 4       | E    | 0           | 364301.672   | 0.045                      | 187.9847  |
| 23   | 20     | 3      | 22    | 19      | 4       | A    | 0           | 364318.824   | -0.047                     | 187.9972  |
| 23   | 20     | 4      | 22    | 19      | 3       | A    | 0           | 364318.824   | -0.047                     | 187.9972  |
| 68   | 33     | 36     | 68    | 32      | 37      | A    | 0           | 364429.825   | -0.010                     | 745.6781  |
| 68   | 33     | 35     | 68    | 32      | 36      | A    | 0           | 364429.825   | -0.010                     | 745.6781  |
| 68   | 33     | 35     | 68    | 32      | 36      | E    | 0           | 364467.960   | -0.146                     | 745.6714  |
| 57   | 17     | 41     | 56    | 17      | 40      | A    | 0           | 364492.628   | -0.044                     | 455.1782  |
| 57   | 17     | 41     | 56    | 17      | 40      | E    | 0           | 364505.707   | 0.078                      | 455.1767  |
| 67   | 33     | 35     | 67    | 32      | 36      | E    | 0           | 364843.669   | -0.173                     | 731.5625  |
| 67   | 33     | 35     | 67    | 32      | 36      | A    | 0           | 364845.612   | -0.082                     | 731.5750  |
| 67   | 33     | 34     | 67    | 32      | 35      | A    | 0           | 364845.612   | -0.082                     | 731.5750  |
| 37   | 13     | 25     | 36    | 12      | 24      | E    | 0           | 364872.522   | 0.066                      | 233.1634  |
| 58   | 21     | 38     | 57    | 21      | 37      | A    | 0           | 365055.021   | 0.210                      | 493.6681  |
| 37   | 13     | 25     | 36    | 12      | 24      | A    | 0           | 365096.866   | -0.002                     | 233.1584  |
| 25   | 19     | 6      | 24    | 18      | 6       | E    | 0           | 365121.277   | -0.064                     | 190.6149  |
| 25   | 19     | 7      | 24    | 18      | 7       | E    | 0           | 365146.485   | 0.036                      | 190.6028  |
| 25   | 19     | 7      | 24    | 18      | 6       | A    | 0           | 365168.728   | -0.038                     | 190.6145  |
| 25   | 19     | 6      | 24    | 18      | 7       | A    | 0           | 365168.728   | -0.038                     | 190.6145  |
| 63   | 8      | 55     | 62    | 8       | 54      | A    | 1           | 365176.228   | -0.056                     | 607.8418  |
| 63   | 8      | 55     | 62    | 9       | 54      | A    | 1           | 365176.228   | -0.051                     | 607.8418  |
| 63   | 9      | 55     | 62    | 8       | 54      | A    | 1           | 365176.228   | -0.058                     | 607.8418  |
| 63   | 9      | 55     | 62    | 9       | 54      | A    | 1           | 365176.228   | -0.053                     | 607.8418  |
| 62   | 9      | 53     | 61    | 9       | 52      | A    | 1           | 365218.867   | -0.000                     | 603.4662  |
| 62   | 9      | 53     | 61    | 10      | 52      | A    | 1           | 365218.867   | 0.147                      | 603.4662  |
| 62   | 10     | 53     | 61    | 9       | 52      | A    | 1           | 365218.867   | -0.079                     | 603.4662  |
| 62   | 10     | 53     | 61    | 10      | 52      | A    | 1           | 365218.867   | 0.069                      | 603.4662  |
| 64   | 7      | 57     | 63    | 7       | 56      | A    | 1           | 365224.398   | -0.072                     | 611.7341  |
| 64   | 7      | 57     | 63    | 8       | 56      | A    | 1           | 365224.398   | -0.072                     | 611.7341  |
| 64   | 8      | 57     | 63    | 7       | 56      | A    | 1           | 365224.398   | -0.072                     | 611.7341  |
| 64   | 8      | 57     | 63    | 8       | 56      | A    | 1           | 365224.398   | -0.072                     | 611.7341  |
| 66   | 33     | 34     | 66    | 32      | 35      | E    | 0           | 365240.901   | -0.131                     | 717.6728  |
| 66   | 33     | 34     | 66    | 32      | 35      | A    | 0           | 365242.496   | -0.046                     | 717.6854  |
| 66   | 33     | 33     | 66    | 32      | 34      | A    | 0           | 365242.496   | -0.046                     | 717.6854  |
| 37   | 13     | 24     | 36    | 12      | 24      | E    | 0           | 365276.665   | -0.127                     | 233.1634  |
| 63   | 8      | 55     | 62    | 8       | 54      | E    | 1           | 365320.863   | -0.039                     | 607.7784  |
| 63   | 8      | 55     | 62    | 9       | 54      | E    | 1           | 365320.863   | -0.033                     | 607.7784  |
| 63   | 9      | 55     | 62    | 8       | 54      | E    | 1           | 365320.863   | -0.042                     | 607.7784  |
| 63   | 9      | 55     | 62    | 9       | 54      | E    | 1           | 365320.863   | -0.036                     | 607.7784  |
| 65   | 6      | 59     | 64    | 6       | 58      | A    | 1           | 365332.099   | -0.216                     | 615.1656  |



| $J'$ | $K'_a$ | $K'_c$ | $J''$ | $K''_a$ | $K''_c$ | Sym. | $v_{tCH_3}$ | $\nu_{Obs.}$ | $\nu_{Obs.} - \nu_{Calc.}$ | $E_{low}$ |
|------|--------|--------|-------|---------|---------|------|-------------|--------------|----------------------------|-----------|
| 65   | 6      | 59     | 64    | 7       | 58      | A    | 1           | 365332.099   | -0.216                     | 615.1656  |
| 65   | 7      | 59     | 64    | 6       | 58      | A    | 1           | 365332.099   | -0.216                     | 615.1656  |
| 65   | 7      | 59     | 64    | 7       | 58      | A    | 1           | 365332.099   | -0.216                     | 615.1656  |
| 64   | 7      | 57     | 63    | 7       | 56      | E    | 1           | 365357.391   | 0.020                      | 611.6566  |
| 64   | 7      | 57     | 63    | 8       | 56      | E    | 1           | 365357.391   | 0.021                      | 611.6566  |
| 64   | 8      | 57     | 63    | 7       | 56      | E    | 1           | 365357.391   | 0.020                      | 611.6566  |
| 64   | 8      | 57     | 63    | 8       | 56      | E    | 1           | 365357.391   | 0.021                      | 611.6566  |
| 62   | 9      | 53     | 61    | 9       | 52      | E    | 1           | 365376.959   | -0.012                     | 603.4119  |
| 62   | 9      | 53     | 61    | 10      | 52      | E    | 1           | 365376.959   | 0.172                      | 603.4119  |
| 62   | 10     | 53     | 61    | 9       | 52      | E    | 1           | 365376.959   | -0.111                     | 603.4119  |
| 62   | 10     | 53     | 61    | 10      | 52      | E    | 1           | 365376.959   | 0.073                      | 603.4119  |
| 57   | 15     | 43     | 56    | 15      | 42      | E    | 0           | 365385.909   | -0.379                     | 444.8451  |
| 63   | 8      | 55     | 62    | 8       | 54      | A    | 0           | 365409.158   | 0.023                      | 479.5022  |
| 63   | 8      | 55     | 62    | 9       | 54      | A    | 0           | 365409.158   | 0.028                      | 479.5022  |
| 63   | 9      | 55     | 62    | 8       | 54      | A    | 0           | 365409.158   | 0.020                      | 479.5022  |
| 63   | 9      | 55     | 62    | 9       | 54      | A    | 0           | 365409.158   | 0.026                      | 479.5022  |
| 64   | 7      | 57     | 63    | 7       | 56      | A    | 0           | 365445.911   | 0.006                      | 483.3796  |
| 64   | 7      | 57     | 63    | 8       | 56      | A    | 0           | 365445.911   | 0.006                      | 483.3796  |
| 64   | 8      | 57     | 63    | 7       | 56      | A    | 0           | 365445.911   | 0.006                      | 483.3796  |
| 64   | 8      | 57     | 63    | 8       | 56      | A    | 0           | 365445.911   | 0.006                      | 483.3796  |
| 65   | 6      | 59     | 64    | 6       | 58      | E    | 1           | 365453.753   | -0.139                     | 615.0688  |
| 65   | 6      | 59     | 64    | 7       | 58      | E    | 1           | 365453.753   | -0.139                     | 615.0688  |
| 65   | 7      | 59     | 64    | 6       | 58      | E    | 1           | 365453.753   | -0.139                     | 615.0688  |
| 65   | 7      | 59     | 64    | 7       | 58      | E    | 1           | 365453.753   | -0.139                     | 615.0688  |
| 62   | 9      | 53     | 61    | 9       | 52      | A    | 0           | 365463.784   | -0.053                     | 475.1378  |
| 62   | 9      | 53     | 61    | 10      | 52      | A    | 0           | 365463.784   | 0.115                      | 475.1378  |
| 62   | 10     | 53     | 61    | 9       | 52      | A    | 0           | 365463.784   | -0.143                     | 475.1378  |
| 62   | 10     | 53     | 61    | 10      | 52      | A    | 0           | 365463.784   | 0.025                      | 475.1378  |
| 66   | 5      | 61     | 65    | 5       | 60      | A    | 1           | 365480.265   | -0.137                     | 618.1531  |
| 66   | 5      | 61     | 65    | 6       | 60      | A    | 1           | 365480.265   | -0.137                     | 618.1531  |
| 66   | 6      | 61     | 65    | 5       | 60      | A    | 1           | 365480.265   | -0.137                     | 618.1531  |
| 66   | 6      | 61     | 65    | 6       | 60      | A    | 1           | 365480.265   | -0.137                     | 618.1531  |
| 65   | 6      | 59     | 64    | 6       | 58      | A    | 0           | 365542.209   | 0.016                      | 486.7921  |
| 65   | 6      | 59     | 64    | 7       | 58      | A    | 0           | 365542.209   | 0.016                      | 486.7921  |
| 65   | 7      | 59     | 64    | 6       | 58      | A    | 0           | 365542.209   | 0.016                      | 486.7921  |
| 65   | 7      | 59     | 64    | 7       | 58      | A    | 0           | 365542.209   | 0.016                      | 486.7921  |
| 61   | 10     | 51     | 60    | 11      | 50      | E    | 1           | 365577.252   | 0.077                      | 598.5260  |
| 61   | 11     | 51     | 60    | 11      | 50      | E    | 1           | 365579.841   | 0.199                      | 598.5260  |
| 61   | 10     | 51     | 60    | 10      | 50      | E    | 1           | 365581.440   | -0.168                     | 598.5259  |
| 61   | 11     | 51     | 60    | 10      | 50      | E    | 1           | 365584.324   | 0.250                      | 598.5259  |
| 66   | 5      | 61     | 65    | 5       | 60      | E    | 1           | 365590.038   | 0.004                      | 618.0314  |
| 66   | 5      | 61     | 65    | 6       | 60      | E    | 1           | 365590.038   | 0.004                      | 618.0314  |
| 66   | 6      | 61     | 65    | 5       | 60      | E    | 1           | 365590.038   | 0.004                      | 618.0314  |
| 66   | 6      | 61     | 65    | 6       | 60      | E    | 1           | 365590.038   | 0.004                      | 618.0314  |
| 65   | 33     | 33     | 65    | 32      | 34      | A    | 0           | 365621.237   | 0.153                      | 704.0091  |
| 65   | 33     | 32     | 65    | 32      | 33      | A    | 0           | 365621.237   | 0.153                      | 704.0091  |
| 37   | 13     | 25     | 36    | 12      | 25      | E    | 0           | 365647.381   | -0.006                     | 233.1376  |
| 67   | 4      | 63     | 66    | 4       | 62      | A    | 1           | 365655.825   | -0.288                     | 620.7098  |
| 67   | 4      | 63     | 66    | 5       | 62      | A    | 1           | 365655.825   | -0.288                     | 620.7098  |
| 67   | 5      | 63     | 66    | 4       | 62      | A    | 1           | 365655.825   | -0.288                     | 620.7098  |
| 67   | 5      | 63     | 66    | 5       | 62      | A    | 1           | 365655.825   | -0.288                     | 620.7098  |
| 66   | 5      | 61     | 65    | 5       | 60      | A    | 0           | 365677.951   | 0.024                      | 489.7563  |
| 66   | 5      | 61     | 65    | 6       | 60      | A    | 0           | 365677.951   | 0.024                      | 489.7563  |
| 66   | 6      | 61     | 65    | 5       | 60      | A    | 0           | 365677.951   | 0.024                      | 489.7563  |
| 66   | 6      | 61     | 65    | 6       | 60      | A    | 0           | 365677.951   | 0.024                      | 489.7563  |
| 67   | 4      | 63     | 66    | 4       | 62      | E    | 1           | 365752.284   | -0.002                     | 620.5571  |
| 67   | 4      | 63     | 66    | 5       | 62      | E    | 1           | 365752.284   | -0.002                     | 620.5571  |
| 67   | 5      | 63     | 66    | 4       | 62      | E    | 1           | 365752.284   | -0.002                     | 620.5571  |
| 67   | 5      | 63     | 66    | 5       | 62      | E    | 1           | 365752.284   | -0.002                     | 620.5571  |
| 59   | 31     | 29     | 58    | 31      | 28      | A    | 0           | 365775.579   | 0.203                      | 602.3472  |
| 59   | 31     | 28     | 58    | 31      | 27      | A    | 0           | 365775.579   | 0.203                      | 602.3472  |
| 60   | 11     | 49     | 59    | 12      | 48      | A    | 1           | 365779.796   | 0.310                      | 593.1280  |
| 60   | 12     | 49     | 59    | 12      | 48      | A    | 1           | 365820.179   | 0.246                      | 593.1280  |
| 57   | 17     | 40     | 56    | 17      | 39      | A    | 0           | 365822.694   | -0.067                     | 455.2458  |
| 57   | 17     | 40     | 56    | 17      | 39      | E    | 0           | 365829.123   | 0.107                      | 455.2454  |
| 67   | 4      | 63     | 66    | 4       | 62      | A    | 0           | 365839.935   | 0.039                      | 492.2849  |
| 67   | 4      | 63     | 66    | 5       | 62      | A    | 0           | 365839.935   | 0.039                      | 492.2849  |
| 67   | 5      | 63     | 66    | 4       | 62      | A    | 0           | 365839.935   | 0.039                      | 492.2849  |
| 67   | 5      | 63     | 66    | 5       | 62      | A    | 0           | 365839.935   | 0.039                      | 492.2849  |
| 68   | 3      | 65     | 67    | 3       | 64      | A    | 1           | 365850.910   | -0.134                     | 622.8464  |
| 68   | 3      | 65     | 67    | 4       | 64      | A    | 1           | 365850.910   | -0.134                     | 622.8464  |
| 68   | 4      | 65     | 67    | 3       | 64      | A    | 1           | 365850.910   | -0.134                     | 622.8464  |
| 68   | 4      | 65     | 67    | 4       | 64      | A    | 1           | 365850.910   | -0.134                     | 622.8464  |
| 55   | 14     | 41     | 54    | 14      | 40      | A    | 0           | 365887.512   | 0.054                      | 418.4957  |
| 37   | 13     | 24     | 36    | 12      | 25      | A    | 0           | 365914.258   | -0.056                     | 233.1357  |
| 27   | 18     | 10     | 26    | 17      | 10      | E    | 0           | 365951.832   | 0.033                      | 194.4542  |
| 60   | 11     | 49     | 59    | 12      | 48      | E    | 1           | 365970.812   | -0.033                     | 593.0753  |
| 27   | 18     | 9      | 26    | 17      | 10      | A    | 0           | 365978.914   | -0.036                     | 194.4650  |
| 27   | 18     | 10     | 26    | 17      | 9       | A    | 0           | 365978.914   | -0.036                     | 194.4650  |
| 68   | 3      | 65     | 67    | 3       | 64      | E    | 0           | 366016.690   | 0.053                      | 494.3941  |
| 68   | 4      | 65     | 67    | 4       | 64      | E    | 0           | 366016.690   | 0.053                      | 494.3941  |
| 68   | 3      | 65     | 67    | 3       | 64      | A    | 0           | 366019.121   | 0.019                      | 494.3881  |
| 68   | 3      | 65     | 67    | 4       | 64      | A    | 0           | 366019.121   | 0.019                      | 494.3881  |
| 68   | 4      | 65     | 67    | 3       | 64      | A    | 0           | 366019.121   | 0.019                      | 494.3881  |
| 68   | 4      | 65     | 67    | 4       | 64      | A    | 0           | 366019.121   | 0.019                      | 494.3881  |
| 60   | 11     | 49     | 59    | 12      | 48      | E    | 0           | 366045.742   | 0.016                      | 464.8119  |
| 69   | 2      | 67     | 68    | 2       | 66      | A    | 1           | 366059.484   | -0.066                     | 624.5716  |
| 69   | 2      | 67     | 68    | 3       | 66      | A    | 1           | 366059.484   | -0.066                     | 624.5716  |
| 69   | 3      | 67     | 68    | 2       | 66      | A    | 1           | 366059.484   | -0.066                     | 624.5716  |
| 69   | 3      | 67     | 68    | 3       | 66      | A    | 1           | 366059.484   | -0.066                     | 624.5716  |
| 69   | 2      | 67     | 68    | 2       | 66      | E    | 1           | 366120.777   | 0.056                      | 624.3350  |
| 69   | 3      | 67     | 68    | 3       | 66      | E    | 1           | 366120.777   | 0.056                      | 624.3350  |
| 59   | 12     | 47     | 58    | 13      | 46      | A    | 0           | 366166.721   | -0.396                     | 458.7394  |
| 60   | 12     | 49     | 59    | 11      | 48      | E    | 0           | 366166.721   | 0.193                      | 464.8094  |
| 60   | 12     | 49     | 59    | 11      | 48      | A    | 0           | 366173.096   | -0.033                     | 464.8077  |
| 69   | 2      | 67     | 68    | 2       | 66      | E    | 0           | 366207.457   | 0.067                      | 496.0812  |
| 69   | 3      | 67     | 68    | 3       | 66      | E    | 0           | 366207.457   | 0.067                      | 496.0812  |
| 69   | 2      | 67     | 68    | 2       | 66      | A    | 0           | 366209.238   | -0.025                     | 496.0738  |
| 69   | 2      | 67     | 68    | 3       | 66      | A    | 0           | 366209.238   | -0.025                     | 496.0738  |
| 69   | 3      | 67     | 68    | 2       | 66      | A    | 0           | 366209.238   | -0.025                     | 496.0738  |
| 69   | 3      | 67     | 68    | 3       | 66      | A    | 0           | 366209.238   | -0.025                     | 496.0738  |
| 70   | 1      | 69     | 69    | 1       | 68      | A    | 1           | 366277.977   | 0.099                      | 625.8930  |
| 70   | 1      | 69     | 69    | 2       | 68      | A    | 1           | 366277.977   | 0.099                      | 625.8930  |
| 70   | 2      | 69     | 69    | 1       | 68      | A    | 1           | 366277.977   | 0.099                      | 625.8930  |
| 70   | 2      | 69     | 69    | 2       | 68      | A    | 1           | 366277.977   | 0.099                      | 625.8930  |
| 70   | 1      | 69     | 69    | 1       | 68      | E    | 1           | 366315.647   | 0.098                      | 625.6013  |
| 70   | 2      | 69     | 69    | 2       | 68      | E    | 1           | 366315.647   | 0.098                      | 625.6013  |
| 70   | 1      | 69     | 69    | 1       | 68      | E    | 0           | 366404.617   | -0.139                     | 497.3579  |
| 70   | 2      | 69     | 69    | 2       | 68      | E    | 0           | 366404.617   | -0.139                     | 497.3579  |
| 70   | 1      | 69     | 69    | 1       | 68      | A    | 0           | 366406.117   | 0.207                      | 497.3488  |
| 70   | 1      | 69     | 69    | 2       | 68      | A    | 0           | 366406.117   | 0.207                      | 497.3488  |
| 70   | 2      | 69     | 69    | 1       | 68      | A    | 0           | 366406.117   | 0.207                      | 497.3488  |
| 70   | 2      | 69     | 69    | 2       | 68      | A    | 0           | 366406.117   | 0.207                      | 497.3488  |
| 59   | 13     | 47     | 58    | 13      | 46      | A    | 1           | 366536.612   | 0.221                      | 587.0581  |
| 29   | 17     | 12     | 28    | 16      | 12      | E    | 0           | 366659.967   | -0.082                     | 199.5673  |
| 29   | 17     | 13     | 28    | 16      | 13      | E    | 0           | 366674.785   | 0.032                      | 199.5541  |



| $J'$ | $K'_a$ | $K'_c$ | $J''$ | $K''_a$ | $K''_c$ | Sym. | $v_{tCH_3}$ | $\nu_{Obs.}$ | $\nu_{Obs.} - \nu_{Calc.}$ | $E_{low}$ |
|------|--------|--------|-------|---------|---------|------|-------------|--------------|----------------------------|-----------|
| 29   | 17     | 13     | 28    | 16      | 12      | A    | 0           | 366706.420   | -0.056                     | 199.5637  |
| 29   | 17     | 12     | 28    | 16      | 13      | A    | 0           | 366706.420   | -0.056                     | 199.5637  |
| 59   | 13     | 47     | 58    | 13      | 46      | E    | 1           | 366757.943   | 0.148                      | 586.9970  |
| 59   | 13     | 47     | 58    | 13      | 46      | E    | 0           | 366822.331   | 0.061                      | 458.7414  |
| 59   | 13     | 47     | 58    | 13      | 46      | A    | 0           | 366829.143   | 0.042                      | 458.7394  |
| 61   | 33     | 29     | 61    | 32      | 30      | A    | 0           | 366965.291   | -0.103                     | 651.4310  |
| 61   | 33     | 28     | 61    | 32      | 29      | A    | 0           | 366965.291   | -0.103                     | 651.4310  |
| 61   | 33     | 29     | 61    | 32      | 30      | E    | 0           | 366965.291   | -0.096                     | 651.4181  |
| 61   | 33     | 28     | 61    | 32      | 29      | E    | 0           | 367005.543   | -0.049                     | 651.4243  |
| 60   | 14     | 46     | 59    | 15      | 45      | E    | 0           | 367091.066   | -0.038                     | 481.9951  |
| 35   | 14     | 22     | 34    | 13      | 22      | E    | 0           | 367141.668   | -0.013                     | 222.6398  |
| 35   | 14     | 21     | 34    | 13      | 21      | E    | 0           | 367146.519   | -0.008                     | 222.6529  |
| 35   | 14     | 22     | 34    | 13      | 21      | A    | 0           | 367176.832   | -0.070                     | 222.6450  |
| 35   | 14     | 21     | 34    | 13      | 22      | A    | 0           | 367195.825   | -0.031                     | 222.6444  |
| 31   | 16     | 15     | 30    | 15      | 15      | E    | 0           | 367228.475   | -0.049                     | 205.9383  |
| 31   | 16     | 16     | 30    | 15      | 16      | E    | 0           | 367237.365   | 0.003                      | 205.9248  |
| 59   | 12     | 47     | 58    | 12      | 46      | E    | 0           | 367241.691   | -0.013                     | 458.7054  |
| 59   | 12     | 47     | 58    | 12      | 46      | A    | 0           | 367250.224   | -0.105                     | 458.7033  |
| 60   | 33     | 28     | 60    | 32      | 29      | A    | 0           | 367262.128   | 0.022                      | 638.8169  |
| 60   | 33     | 27     | 60    | 32      | 28      | A    | 0           | 367262.128   | 0.022                      | 638.8169  |
| 60   | 33     | 28     | 60    | 32      | 29      | E    | 0           | 367262.128   | -0.232                     | 638.8039  |
| 31   | 16     | 15     | 30    | 15      | 16      | A    | 0           | 367273.439   | 0.010                      | 205.9331  |
| 60   | 33     | 27     | 60    | 32      | 28      | E    | 0           | 367302.503   | -0.020                     | 638.8102  |
| 59   | 27     | 33     | 58    | 27      | 32      | A    | 0           | 367305.150   | -0.080                     | 558.8130  |
| 59   | 27     | 32     | 58    | 27      | 31      | A    | 0           | 367305.150   | -0.080                     | 558.8130  |
| 59   | 27     | 33     | 58    | 27      | 32      | E    | 0           | 367306.695   | -0.070                     | 558.8015  |
| 59   | 27     | 32     | 58    | 27      | 31      | E    | 0           | 367308.214   | -0.025                     | 558.8026  |
| 33   | 15     | 18     | 32    | 14      | 18      | E    | 0           | 367490.433   | -0.032                     | 213.6146  |
| 33   | 15     | 19     | 32    | 14      | 19      | E    | 0           | 367492.788   | -0.039                     | 213.6012  |
| 33   | 15     | 19     | 32    | 14      | 18      | A    | 0           | 367533.114   | 0.091                      | 213.6079  |
| 59   | 33     | 27     | 59    | 32      | 28      | A    | 0           | 367544.395   | 0.158                      | 626.4143  |
| 59   | 33     | 26     | 59    | 32      | 27      | A    | 0           | 367544.395   | 0.158                      | 626.4143  |
| 59   | 33     | 27     | 59    | 32      | 28      | E    | 0           | 367544.395   | -0.345                     | 626.4013  |
| 59   | 33     | 26     | 59    | 32      | 27      | E    | 0           | 367584.637   | -0.223                     | 626.4076  |
| 58   | 19     | 40     | 57    | 19      | 39      | E    | 0           | 367756.330   | 0.009                      | 479.4821  |
| 58   | 19     | 39     | 57    | 19      | 38      | E    | 0           | 367765.840   | -0.197                     | 479.4928  |
| 58   | 19     | 39     | 57    | 19      | 38      | A    | 0           | 367778.453   | -0.134                     | 479.4925  |
| 58   | 33     | 25     | 58    | 32      | 26      | E    | 0           | 367853.102   | -0.053                     | 614.2165  |
| 59   | 13     | 47     | 58    | 12      | 46      | E    | 0           | 367900.549   | -0.010                     | 458.7054  |
| 59   | 13     | 47     | 58    | 12      | 46      | A    | 0           | 367912.267   | -0.045                     | 458.7033  |
| 59   | 13     | 46     | 58    | 14      | 45      | A    | 0           | 367996.884   | -0.025                     | 464.2647  |
| 59   | 13     | 46     | 58    | 14      | 45      | E    | 0           | 368008.945   | 0.026                      | 464.2667  |
| 57   | 33     | 24     | 57    | 32      | 25      | E    | 0           | 368108.032   | 0.095                      | 602.2365  |
| 39   | 12     | 27     | 38    | 11      | 28      | E    | 0           | 368364.013   | -0.065                     | 245.1450  |
| 55   | 33     | 23     | 55    | 32      | 24      | A    | 0           | 368537.462   | -0.217                     | 578.9156  |
| 55   | 33     | 22     | 55    | 32      | 23      | A    | 0           | 368537.462   | -0.217                     | 578.9156  |
| 55   | 33     | 23     | 55    | 32      | 24      | E    | 0           | 368539.093   | 0.029                      | 578.9023  |
| 55   | 33     | 22     | 55    | 32      | 23      | E    | 0           | 368579.024   | 0.013                      | 578.9089  |
| 54   | 33     | 22     | 54    | 32      | 23      | A    | 0           | 368754.756   | -0.046                     | 567.5676  |
| 54   | 33     | 21     | 54    | 32      | 22      | A    | 0           | 368754.756   | -0.046                     | 567.5676  |
| 54   | 33     | 22     | 54    | 32      | 23      | E    | 0           | 368756.328   | -0.052                     | 567.5543  |
| 53   | 33     | 20     | 53    | 32      | 21      | E    | 0           | 369001.922   | -0.088                     | 556.4231  |
| 59   | 24     | 35     | 58    | 24      | 34      | A    | 0           | 369036.878   | -0.031                     | 530.4178  |
| 59   | 24     | 36     | 58    | 24      | 35      | A    | 0           | 369036.878   | -0.031                     | 530.4178  |
| 52   | 33     | 20     | 52    | 32      | 21      | A    | 0           | 369154.912   | 0.019                      | 545.5019  |
| 52   | 33     | 19     | 52    | 32      | 20      | A    | 0           | 369154.912   | 0.019                      | 545.5019  |
| 52   | 33     | 20     | 52    | 32      | 21      | E    | 0           | 369156.736   | -0.091                     | 545.4885  |
| 52   | 33     | 19     | 52    | 32      | 20      | E    | 0           | 369196.586   | -0.060                     | 545.4952  |
| 51   | 33     | 19     | 51    | 32      | 20      | A    | 0           | 369338.744   | -0.013                     | 534.7838  |
| 51   | 33     | 18     | 51    | 32      | 19      | A    | 0           | 369338.744   | -0.013                     | 534.7838  |
| 51   | 33     | 19     | 51    | 32      | 20      | E    | 0           | 369340.736   | -0.118                     | 534.7704  |
| 51   | 33     | 18     | 51    | 32      | 19      | E    | 0           | 369380.609   | -0.021                     | 534.7771  |
| 50   | 33     | 18     | 50    | 32      | 19      | A    | 0           | 369512.395   | -0.010                     | 524.2753  |
| 50   | 33     | 17     | 50    | 32      | 18      | A    | 0           | 369512.395   | -0.010                     | 524.2753  |
| 50   | 33     | 18     | 50    | 32      | 19      | E    | 0           | 369514.409   | -0.249                     | 524.2619  |
| 58   | 18     | 41     | 57    | 18      | 40      | A    | 0           | 369534.673   | -0.119                     | 473.1472  |
| 22   | 21     | 1      | 21    | 20      | 1       | E    | 0           | 369552.311   | -0.039                     | 190.9085  |
| 22   | 21     | 2      | 21    | 20      | 2       | E    | 0           | 369586.164   | 0.029                      | 190.8982  |
| 22   | 21     | 2      | 21    | 20      | 1       | A    | 0           | 369598.067   | -0.060                     | 190.9113  |
| 22   | 21     | 1      | 21    | 20      | 2       | A    | 0           | 369598.067   | -0.060                     | 190.9113  |
| 49   | 33     | 17     | 49    | 32      | 18      | A    | 0           | 369676.253   | -0.002                     | 513.9761  |
| 49   | 33     | 16     | 49    | 32      | 17      | A    | 0           | 369676.253   | -0.002                     | 513.9761  |
| 49   | 33     | 17     | 49    | 32      | 18      | E    | 0           | 369678.631   | -0.023                     | 513.9627  |
| 49   | 33     | 16     | 49    | 32      | 17      | E    | 0           | 369718.256   | -0.091                     | 513.9695  |
| 59   | 23     | 37     | 58    | 23      | 36      | A    | 0           | 369795.376   | -0.063                     | 521.7901  |
| 59   | 23     | 36     | 58    | 23      | 35      | A    | 0           | 369795.376   | -0.070                     | 521.7901  |
| 59   | 23     | 36     | 58    | 23      | 35      | E    | 0           | 369799.519   | -0.165                     | 521.7847  |
| 48   | 33     | 16     | 48    | 32      | 17      | E    | 0           | 369833.148   | -0.098                     | 503.8726  |
| 48   | 33     | 15     | 48    | 32      | 16      | E    | 0           | 369872.924   | 0.026                      | 503.8795  |
| 58   | 18     | 40     | 57    | 18      | 39      | E    | 0           | 369882.825   | 0.022                      | 473.1626  |
| 58   | 18     | 40     | 57    | 18      | 39      | A    | 0           | 369893.621   | -0.050                     | 473.1634  |
| 47   | 33     | 15     | 47    | 32      | 16      | A    | 0           | 369976.124   | -0.035                     | 494.0051  |
| 47   | 33     | 14     | 47    | 32      | 15      | A    | 0           | 369976.124   | -0.035                     | 494.0051  |
| 47   | 33     | 15     | 47    | 32      | 16      | E    | 0           | 369978.805   | -0.021                     | 493.9915  |
| 38   | 13     | 26     | 37    | 12      | 25      | A    | 0           | 370008.914   | 0.044                      | 241.0066  |
| 47   | 33     | 14     | 47    | 32      | 15      | E    | 0           | 370018.555   | 0.118                      | 493.9984  |
| 46   | 33     | 14     | 46    | 32      | 15      | A    | 0           | 370112.825   | -0.161                     | 484.3328  |
| 46   | 33     | 13     | 46    | 32      | 14      | A    | 0           | 370112.825   | -0.161                     | 484.3328  |
| 46   | 33     | 13     | 46    | 32      | 14      | E    | 0           | 370155.368   | 0.022                      | 484.3261  |
| 45   | 33     | 13     | 45    | 32      | 14      | A    | 0           | 370241.568   | 0.010                      | 474.8691  |
| 45   | 33     | 12     | 45    | 32      | 13      | A    | 0           | 370241.568   | 0.010                      | 474.8691  |
| 64   | 8      | 56     | 63    | 8       | 55      | A    | 1           | 370280.434   | -0.074                     | 620.0227  |
| 64   | 8      | 56     | 63    | 9       | 55      | A    | 1           | 370280.434   | -0.071                     | 620.0227  |
| 64   | 9      | 56     | 63    | 8       | 55      | A    | 1           | 370280.434   | -0.075                     | 620.0227  |
| 64   | 9      | 56     | 63    | 9       | 55      | A    | 1           | 370280.434   | -0.073                     | 620.0227  |
| 45   | 33     | 12     | 45    | 32      | 13      | E    | 0           | 370283.978   | -0.015                     | 474.8624  |
| 38   | 13     | 25     | 37    | 12      | 25      | E    | 0           | 370296.752   | 0.078                      | 241.0112  |
| 63   | 9      | 54     | 62    | 9       | 53      | A    | 1           | 370309.565   | 0.024                      | 615.6486  |
| 63   | 9      | 54     | 62    | 10      | 53      | A    | 1           | 370309.565   | 0.103                      | 615.6486  |
| 63   | 10     | 54     | 62    | 9       | 53      | A    | 1           | 370309.565   | -0.018                     | 615.6486  |
| 63   | 10     | 54     | 62    | 10      | 53      | A    | 1           | 370309.565   | 0.061                      | 615.6486  |
| 65   | 7      | 58     | 64    | 7       | 57      | A    | 1           | 370336.346   | -0.109                     | 623.9167  |
| 65   | 7      | 58     | 64    | 8       | 57      | A    | 1           | 370336.346   | -0.109                     | 623.9167  |
| 65   | 8      | 58     | 64    | 7       | 57      | A    | 1           | 370336.346   | -0.109                     | 623.9167  |
| 65   | 8      | 58     | 64    | 8       | 57      | A    | 1           | 370336.346   | -0.109                     | 623.9167  |
| 24   | 20     | 4      | 23    | 19      | 4       | E    | 0           | 370413.735   | -0.031                     | 192.7209  |
| 64   | 8      | 56     | 63    | 8       | 55      | E    | 1           | 370422.826   | -0.009                     | 619.9642  |
| 64   | 8      | 56     | 63    | 9       | 55      | E    | 1           | 370422.826   | -0.006                     | 619.9642  |
| 64   | 9      | 56     | 63    | 8       | 55      | E    | 1           | 370422.826   | -0.010                     | 619.9642  |
| 64   | 9      | 56     | 63    | 9       | 55      | E    | 1           | 370422.826   | -0.007                     | 619.9642  |
| 24   | 20     | 5      | 23    | 19      | 5       | E    | 0           | 370443.438   | 0.024                      | 192.7097  |
| 66   | 6      | 60     | 65    | 6       | 59      | A    | 1           | 370448.648   | -0.147                     | 627.3518  |
| 66   | 6      | 60     | 65    | 7       | 59      | A    | 1           | 370448.648   | -0.147                     | 627.3518  |
| 66   | 7      | 60     | 65    | 6       | 59      | A    | 1           | 370448.648   | -0.147                     | 627.3518  |
| 66   | 7      | 60     | 65    | 7       | 59      | A    | 1           | 370448.648   | -0.147                     | 627.3518  |
| 24   | 20     | 4      | 23    | 19      | 5       | A    | 0           | 370460.656   | -0.031                     | 192.7222  |



| $J'$ | $K'_a$ | $K'_c$ | $J''$ | $K''_a$ | $K''_c$ | Sym. | $v_{tCH_3}$ | $\nu_{Obs.}$ | $\nu_{Obs.} - \nu_{Calc.}$ | $E_{low}$ |
|------|--------|--------|-------|---------|---------|------|-------------|--------------|----------------------------|-----------|
| 24   | 20     | 5      | 23    | 19      | 4       | A    | 0           | 370460.656   | -0.031                     | 192.7222  |
| 63   | 9      | 54     | 62    | 9       | 53      | E    | 1           | 370464.452   | -0.068                     | 615.5995  |
| 63   | 9      | 54     | 62    | 10      | 53      | E    | 1           | 370464.452   | 0.030                      | 615.5995  |
| 63   | 10     | 54     | 62    | 9       | 53      | E    | 1           | 370464.452   | -0.121                     | 615.5995  |
| 63   | 10     | 54     | 62    | 10      | 53      | E    | 1           | 370464.452   | -0.022                     | 615.5995  |
| 65   | 7      | 58     | 64    | 7       | 57      | E    | 1           | 370467.657   | -0.008                     | 623.8436  |
| 65   | 7      | 58     | 64    | 8       | 57      | E    | 1           | 370467.657   | -0.008                     | 623.8436  |
| 65   | 8      | 58     | 64    | 7       | 57      | E    | 1           | 370467.657   | -0.009                     | 623.8436  |
| 65   | 8      | 58     | 64    | 8       | 57      | E    | 1           | 370467.657   | -0.008                     | 623.8436  |
| 62   | 10     | 52     | 61    | 11      | 51      | A    | 1           | 370469.762   | -0.047                     | 610.7652  |
| 43   | 33     | 11     | 43    | 32      | 12      | A    | 0           | 370475.411   | 0.044                      | 456.5667  |
| 43   | 33     | 10     | 43    | 32      | 11      | A    | 0           | 370475.411   | 0.044                      | 456.5667  |
| 43   | 33     | 11     | 43    | 32      | 12      | E    | 0           | 370478.622   | 0.142                      | 456.5531  |
| 64   | 8      | 56     | 63    | 8       | 55      | E    | 0           | 370509.214   | -0.004                     | 491.6928  |
| 64   | 9      | 56     | 63    | 9       | 55      | E    | 0           | 370509.214   | -0.002                     | 491.6928  |
| 64   | 8      | 56     | 63    | 8       | 55      | A    | 0           | 370513.649   | 0.012                      | 491.6909  |
| 64   | 8      | 56     | 63    | 9       | 55      | A    | 0           | 370513.649   | 0.014                      | 491.6909  |
| 64   | 9      | 56     | 63    | 8       | 55      | A    | 0           | 370513.649   | 0.010                      | 491.6909  |
| 64   | 9      | 56     | 63    | 9       | 55      | A    | 0           | 370513.649   | 0.013                      | 491.6909  |
| 43   | 33     | 10     | 43    | 32      | 11      | E    | 0           | 370517.947   | 0.013                      | 456.5601  |
| 63   | 9      | 54     | 62    | 9       | 53      | E    | 0           | 370549.467   | -0.009                     | 487.3300  |
| 63   | 10     | 54     | 62    | 10      | 53      | E    | 0           | 370549.467   | 0.032                      | 487.3300  |
| 63   | 9      | 54     | 62    | 9       | 53      | A    | 0           | 370554.367   | 0.073                      | 487.3284  |
| 63   | 9      | 54     | 62    | 10      | 53      | A    | 0           | 370554.367   | 0.162                      | 487.3284  |
| 63   | 10     | 54     | 62    | 9       | 53      | A    | 0           | 370554.367   | 0.025                      | 487.3284  |
| 63   | 10     | 54     | 62    | 10      | 53      | A    | 0           | 370554.367   | 0.115                      | 487.3284  |
| 65   | 7      | 58     | 64    | 7       | 57      | A    | 0           | 370558.533   | 0.013                      | 495.5695  |
| 65   | 7      | 58     | 64    | 8       | 57      | A    | 0           | 370558.533   | 0.013                      | 495.5695  |
| 65   | 8      | 58     | 64    | 7       | 57      | A    | 0           | 370558.533   | 0.013                      | 495.5695  |
| 65   | 8      | 58     | 64    | 8       | 57      | A    | 0           | 370558.533   | 0.013                      | 495.5695  |
| 66   | 6      | 60     | 65    | 6       | 59      | E    | 1           | 370569.137   | -0.013                     | 627.2590  |
| 66   | 6      | 60     | 65    | 7       | 59      | E    | 1           | 370569.137   | -0.013                     | 627.2590  |
| 66   | 7      | 60     | 65    | 6       | 59      | E    | 1           | 370569.137   | -0.013                     | 627.2590  |
| 66   | 7      | 60     | 65    | 7       | 59      | E    | 1           | 370569.137   | -0.013                     | 627.2590  |
| 42   | 33     | 10     | 42    | 32      | 11      | A    | 0           | 370581.303   | 0.011                      | 447.7277  |
| 42   | 33     | 9      | 42    | 32      | 10      | A    | 0           | 370581.303   | 0.011                      | 447.7277  |
| 67   | 5      | 62     | 66    | 5       | 61      | A    | 1           | 370599.295   | -0.180                     | 630.3442  |
| 67   | 5      | 62     | 66    | 6       | 61      | A    | 1           | 370599.295   | -0.180                     | 630.3442  |
| 67   | 6      | 62     | 66    | 5       | 61      | A    | 1           | 370599.295   | -0.180                     | 630.3442  |
| 67   | 6      | 62     | 66    | 6       | 61      | A    | 1           | 370599.295   | -0.180                     | 630.3442  |
| 42   | 33     | 9      | 42    | 32      | 10      | E    | 0           | 370623.724   | -0.191                     | 447.7210  |
| 62   | 10     | 52     | 61    | 11      | 51      | E    | 1           | 370640.602   | 0.008                      | 610.7204  |
| 62   | 11     | 52     | 61    | 10      | 51      | E    | 1           | 370644.538   | 0.113                      | 610.7204  |
| 56   | 15     | 41     | 55    | 15      | 40      | A    | 0           | 370647.060   | -0.349                     | 433.9130  |
| 66   | 6      | 60     | 65    | 6       | 59      | E    | 0           | 370655.808   | -0.036                     | 498.9882  |
| 66   | 7      | 60     | 65    | 7       | 59      | E    | 0           | 370655.808   | -0.036                     | 498.9882  |
| 66   | 6      | 60     | 65    | 6       | 59      | A    | 0           | 370659.600   | 0.033                      | 498.9853  |
| 66   | 6      | 60     | 65    | 7       | 59      | A    | 0           | 370659.600   | 0.033                      | 498.9853  |
| 66   | 7      | 60     | 65    | 6       | 59      | A    | 0           | 370659.600   | 0.033                      | 498.9853  |
| 66   | 7      | 60     | 65    | 7       | 59      | A    | 0           | 370659.600   | 0.033                      | 498.9853  |
| 56   | 15     | 41     | 55    | 15      | 40      | E    | 0           | 370662.554   | -0.024                     | 433.9171  |
| 41   | 33     | 9      | 41    | 32      | 10      | A    | 0           | 370680.701   | 0.361                      | 439.0965  |
| 41   | 33     | 8      | 41    | 32      | 9       | A    | 0           | 370680.701   | 0.361                      | 439.0965  |
| 59   | 22     | 37     | 58    | 22      | 36      | A    | 0           | 370685.151   | 0.446                      | 513.5950  |
| 59   | 22     | 37     | 58    | 22      | 36      | E    | 0           | 370689.237   | 0.002                      | 513.5912  |
| 67   | 5      | 62     | 66    | 5       | 61      | E    | 1           | 370708.247   | -0.012                     | 630.2262  |
| 67   | 5      | 62     | 66    | 6       | 61      | E    | 1           | 370708.247   | -0.012                     | 630.2262  |
| 67   | 6      | 62     | 66    | 5       | 61      | E    | 1           | 370708.247   | -0.012                     | 630.2262  |
| 67   | 6      | 62     | 66    | 6       | 61      | E    | 1           | 370708.247   | -0.012                     | 630.2262  |
| 62   | 10     | 52     | 61    | 11      | 51      | A    | 0           | 370727.600   | -0.112                     | 482.4528  |
| 62   | 11     | 52     | 61    | 10      | 51      | A    | 0           | 370731.310   | 0.081                      | 482.4527  |
| 40   | 33     | 8      | 40    | 32      | 9       | A    | 0           | 370772.965   | 0.136                      | 430.6731  |
| 40   | 33     | 7      | 40    | 32      | 8       | A    | 0           | 370772.965   | 0.136                      | 430.6731  |
| 68   | 4      | 64     | 67    | 4       | 63      | A    | 1           | 370776.457   | -0.199                     | 632.9068  |
| 68   | 4      | 64     | 67    | 5       | 63      | A    | 1           | 370776.457   | -0.199                     | 632.9068  |
| 68   | 5      | 64     | 67    | 4       | 63      | A    | 1           | 370776.457   | -0.199                     | 632.9068  |
| 68   | 5      | 64     | 67    | 5       | 63      | A    | 1           | 370776.457   | -0.199                     | 632.9068  |
| 67   | 5      | 62     | 66    | 6       | 61      | E    | 0           | 370794.744   | 0.006                      | 501.9577  |
| 67   | 6      | 62     | 66    | 5       | 61      | E    | 0           | 370794.744   | 0.006                      | 501.9577  |
| 67   | 5      | 62     | 66    | 5       | 61      | A    | 0           | 370798.114   | 0.019                      | 501.9540  |
| 67   | 5      | 62     | 66    | 6       | 61      | A    | 0           | 370798.114   | 0.019                      | 501.9540  |
| 67   | 6      | 62     | 66    | 5       | 61      | A    | 0           | 370798.114   | 0.019                      | 501.9540  |
| 67   | 6      | 62     | 66    | 6       | 61      | A    | 0           | 370798.114   | 0.019                      | 501.9540  |
| 61   | 11     | 50     | 60    | 12      | 49      | A    | 1           | 370822.296   | 0.236                      | 605.3304  |
| 61   | 12     | 50     | 60    | 12      | 49      | A    | 1           | 370845.476   | 0.254                      | 605.3304  |
| 68   | 4      | 64     | 67    | 4       | 63      | E    | 1           | 370872.270   | -0.013                     | 632.7573  |
| 68   | 4      | 64     | 67    | 5       | 63      | E    | 1           | 370872.270   | -0.013                     | 632.7573  |
| 68   | 5      | 64     | 67    | 4       | 63      | E    | 1           | 370872.270   | -0.013                     | 632.7573  |
| 68   | 5      | 64     | 67    | 5       | 63      | E    | 1           | 370872.270   | -0.013                     | 632.7573  |
| 61   | 12     | 50     | 60    | 11      | 49      | A    | 1           | 370885.925   | 0.256                      | 605.3291  |
| 68   | 4      | 64     | 67    | 4       | 63      | E    | 0           | 370958.758   | 0.020                      | 504.4927  |
| 68   | 5      | 64     | 67    | 5       | 63      | E    | 0           | 370958.758   | 0.020                      | 504.4927  |
| 68   | 4      | 64     | 67    | 4       | 63      | A    | 0           | 370961.691   | 0.011                      | 504.4880  |
| 68   | 4      | 64     | 67    | 5       | 63      | A    | 0           | 370961.691   | 0.011                      | 504.4880  |
| 68   | 5      | 64     | 67    | 4       | 63      | A    | 0           | 370961.691   | 0.011                      | 504.4880  |
| 68   | 5      | 64     | 67    | 5       | 63      | A    | 0           | 370961.691   | 0.011                      | 504.4880  |
| 69   | 3      | 66     | 68    | 3       | 65      | A    | 1           | 370972.268   | -0.142                     | 635.0499  |
| 69   | 3      | 66     | 68    | 4       | 65      | A    | 1           | 370972.268   | -0.142                     | 635.0499  |
| 69   | 4      | 66     | 68    | 3       | 65      | A    | 1           | 370972.268   | -0.142                     | 635.0499  |
| 69   | 4      | 66     | 68    | 4       | 65      | A    | 1           | 370972.268   | -0.142                     | 635.0499  |
| 61   | 11     | 50     | 60    | 12      | 49      | E    | 1           | 371010.760   | 0.082                      | 605.2844  |
| 61   | 12     | 50     | 60    | 12      | 49      | E    | 1           | 371038.184   | -0.135                     | 605.2844  |
| 69   | 3      | 66     | 68    | 3       | 65      | E    | 1           | 371052.488   | 0.063                      | 634.8618  |
| 69   | 3      | 66     | 68    | 4       | 65      | E    | 1           | 371052.488   | 0.063                      | 634.8618  |
| 69   | 4      | 66     | 68    | 3       | 65      | E    | 1           | 371052.488   | 0.063                      | 634.8618  |
| 69   | 4      | 66     | 68    | 4       | 65      | E    | 1           | 371052.488   | 0.063                      | 634.8618  |
| 61   | 11     | 50     | 60    | 12      | 49      | E    | 0           | 371088.256   | 0.014                      | 477.0234  |
| 61   | 11     | 50     | 60    | 12      | 49      | A    | 0           | 371093.884   | -0.219                     | 477.0219  |
| 61   | 12     | 50     | 60    | 12      | 49      | E    | 0           | 371113.620   | -0.059                     | 477.0234  |
| 61   | 12     | 50     | 60    | 12      | 49      | A    | 0           | 371119.677   | -0.011                     | 477.0219  |
| 61   | 11     | 50     | 60    | 11      | 49      | E    | 0           | 371132.424   | -0.105                     | 477.0219  |
| 69   | 3      | 66     | 68    | 3       | 65      | E    | 0           | 371139.329   | -0.020                     | 506.6031  |
| 69   | 4      | 66     | 68    | 4       | 65      | E    | 0           | 371139.329   | -0.020                     | 506.6031  |
| 69   | 3      | 66     | 68    | 3       | 65      | A    | 0           | 371141.842   | 0.038                      | 506.5971  |
| 69   | 3      | 66     | 68    | 4       | 65      | A    | 0           | 371141.842   | 0.038                      | 506.5971  |
| 69   | 4      | 66     | 68    | 3       | 65      | A    | 0           | 371141.842   | 0.038                      | 506.5971  |
| 69   | 4      | 66     | 68    | 4       | 65      | A    | 0           | 371141.842   | 0.038                      | 506.5971  |
| 61   | 12     | 50     | 60    | 11      | 49      | A    | 0           | 371164.219   | -0.004                     | 477.0204  |
| 70   | 2      | 68     | 69    | 2       | 67      | A    | 1           | 371181.342   | -0.041                     | 636.7820  |
| 70   | 2      | 68     | 69    | 3       | 67      | A    | 1           | 371181.342   | -0.041                     | 636.7820  |
| 70   | 3      | 68     | 69    | 2       | 67      | A    | 1           | 371181.342   | -0.041                     | 636.7820  |
| 70   | 3      | 68     | 69    | 3       | 67      | A    | 1           | 371181.342   | -0.041                     | 636.7820  |
| 70   | 2      | 68     | 69    | 2       | 67      | E    | 1           | 371242.499   | 0.092                      | 636.5474  |
| 70   | 2      | 68     | 69    | 3       | 67      | E    | 1           | 371242.499   | 0.092                      | 636.5474  |
| 70   | 3      | 68     | 69    | 2       | 67      | E    | 1           | 371242.499   | 0.092                      | 636.5474  |
| 70   | 3      | 68     | 69    | 3       | 67      | E    | 1           | 371242.499   | 0.092                      | 636.5474  |



| $J'$ | $K'_a$ | $K'_c$ | $J''$ | $K''_a$ | $K''_c$ | Sym. | $v_{tCH_3}$ | $\nu_{Obs.}$ | $\nu_{Obs.} - \nu_{Calc.}$ | $E_{low}$ |
|------|--------|--------|-------|---------|---------|------|-------------|--------------|----------------------------|-----------|
| 26   | 19     | 7      | 25    | 18      | 7       | E    | 0           | 371254.388   | -0.033                     | 195.7589  |
| 26   | 19     | 8      | 25    | 18      | 8       | E    | 0           | 371279.492   | 0.017                      | 195.7469  |
| 26   | 19     | 8      | 25    | 18      | 7       | A    | 0           | 371301.788   | -0.048                     | 195.7586  |
| 26   | 19     | 7      | 25    | 18      | 8       | A    | 0           | 371301.788   | -0.048                     | 195.7586  |
| 70   | 2      | 68     | 69    | 2       | 67      | E    | 0           | 371330.709   | 0.102                      | 508.2966  |
| 70   | 3      | 68     | 69    | 3       | 67      | E    | 0           | 371330.709   | 0.102                      | 508.2966  |
| 70   | 2      | 68     | 69    | 2       | 67      | A    | 0           | 371332.490   | 0.014                      | 508.2892  |
| 70   | 2      | 68     | 69    | 3       | 67      | A    | 0           | 371332.490   | 0.014                      | 508.2892  |
| 70   | 3      | 68     | 69    | 2       | 67      | A    | 0           | 371332.490   | 0.014                      | 508.2892  |
| 70   | 3      | 68     | 69    | 3       | 67      | A    | 0           | 371332.490   | 0.014                      | 508.2892  |
| 60   | 12     | 48     | 59    | 13      | 47      | E    | 0           | 371411.366   | 0.009                      | 470.9773  |
| 60   | 12     | 48     | 59    | 13      | 47      | A    | 0           | 371416.089   | -0.053                     | 470.9755  |
| 58   | 17     | 42     | 57    | 17      | 41      | A    | 0           | 371459.033   | 0.082                      | 467.3363  |
| 38   | 13     | 25     | 37    | 12      | 26      | A    | 0           | 371502.077   | 0.198                      | 240.9655  |
| 60   | 13     | 48     | 59    | 13      | 47      | E    | 0           | 371809.418   | -0.034                     | 470.9773  |
| 60   | 13     | 48     | 59    | 13      | 47      | A    | 0           | 371816.278   | 0.080                      | 470.9755  |
| 28   | 18     | 10     | 27    | 17      | 10      | E    | 0           | 372046.720   | -0.053                     | 200.0339  |
| 28   | 18     | 11     | 27    | 17      | 11      | E    | 0           | 372066.789   | -0.011                     | 200.0211  |
| 60   | 12     | 48     | 59    | 12      | 47      | E    | 0           | 372070.185   | -0.026                     | 470.9553  |
| 60   | 12     | 48     | 59    | 12      | 47      | A    | 0           | 372077.957   | -0.168                     | 470.9535  |
| 28   | 18     | 10     | 27    | 17      | 11      | A    | 0           | 372093.972   | -0.045                     | 200.0319  |
| 28   | 18     | 11     | 27    | 17      | 10      | A    | 0           | 372093.972   | -0.045                     | 200.0319  |
| 60   | 13     | 48     | 59    | 12      | 47      | E    | 0           | 372468.144   | -0.163                     | 470.9553  |
| 60   | 30     | 30     | 59    | 30      | 29      | A    | 0           | 372469.697   | 0.309                      | 603.0778  |
| 60   | 30     | 31     | 59    | 30      | 30      | A    | 0           | 372469.697   | 0.309                      | 603.0778  |
| 60   | 30     | 30     | 59    | 30      | 29      | E    | 0           | 372469.697   | -0.219                     | 603.0687  |
| 60   | 30     | 31     | 59    | 30      | 30      | E    | 0           | 372471.375   | -0.313                     | 603.0652  |
| 60   | 13     | 48     | 59    | 12      | 47      | A    | 0           | 372478.181   | -0.000                     | 470.9535  |
| 59   | 14     | 46     | 58    | 14      | 45      | E    | 0           | 372499.154   | 0.389                      | 464.2667  |
| 59   | 14     | 46     | 58    | 14      | 45      | A    | 0           | 372504.576   | -0.164                     | 464.2647  |
| 58   | 16     | 43     | 57    | 16      | 42      | A    | 0           | 372547.827   | -0.040                     | 462.0267  |
| 30   | 17     | 13     | 29    | 16      | 13      | E    | 0           | 372741.661   | -0.066                     | 205.5623  |
| 30   | 17     | 14     | 29    | 16      | 14      | E    | 0           | 372756.354   | 0.061                      | 205.5491  |
| 30   | 17     | 14     | 29    | 16      | 13      | A    | 0           | 372788.070   | -0.053                     | 205.5587  |
| 30   | 17     | 13     | 29    | 16      | 14      | A    | 0           | 372788.070   | -0.053                     | 205.5587  |
| 36   | 14     | 23     | 35    | 13      | 23      | E    | 0           | 372851.758   | -0.164                     | 229.9816  |
| 36   | 14     | 23     | 35    | 13      | 23      | A    | 0           | 372876.737   | -0.043                     | 229.9870  |
| 36   | 14     | 22     | 35    | 13      | 23      | A    | 0           | 372916.503   | -0.016                     | 229.9858  |
| 59   | 20     | 40     | 58    | 20      | 39      | A    | 0           | 373030.442   | -0.016                     | 498.5576  |
| 32   | 16     | 16     | 31    | 15      | 16      | E    | 0           | 373250.386   | -0.080                     | 212.3689  |
| 32   | 16     | 17     | 31    | 15      | 17      | E    | 0           | 373259.068   | -0.012                     | 212.3555  |
| 32   | 16     | 17     | 31    | 15      | 16      | A    | 0           | 373295.290   | -0.030                     | 212.3637  |
| 34   | 15     | 19     | 33    | 14      | 19      | E    | 0           | 373405.016   | -0.035                     | 220.4919  |
| 34   | 15     | 20     | 33    | 14      | 20      | E    | 0           | 373407.011   | -0.021                     | 220.4786  |
| 34   | 15     | 20     | 33    | 14      | 19      | A    | 0           | 373447.614   | 0.239                      | 220.4852  |
| 58   | 17     | 41     | 57    | 17      | 40      | A    | 0           | 373534.901   | -0.056                     | 467.4483  |
| 58   | 17     | 41     | 57    | 17      | 40      | E    | 0           | 373545.510   | 0.010                      | 467.4481  |
| 39   | 13     | 27     | 38    | 12      | 26      | E    | 0           | 374395.212   | 0.051                      | 249.0986  |
| 39   | 13     | 27     | 38    | 12      | 26      | A    | 0           | 374521.000   | -0.009                     | 249.0942  |
| 59   | 19     | 41     | 58    | 19      | 40      | A    | 0           | 374617.746   | -0.249                     | 491.7568  |
| 60   | 13     | 47     | 59    | 14      | 46      | A    | 0           | 374711.661   | -0.033                     | 476.6901  |
| 60   | 13     | 47     | 59    | 14      | 46      | E    | 0           | 374717.337   | -0.055                     | 476.6919  |
| 60   | 25     | 36     | 59    | 25      | 35      | A    | 0           | 374879.953   | 0.018                      | 551.7567  |
| 60   | 25     | 35     | 59    | 25      | 34      | A    | 0           | 374879.953   | 0.018                      | 551.7567  |
| 59   | 13     | 46     | 58    | 13      | 45      | E    | 0           | 374902.479   | 0.066                      | 464.0367  |
| 59   | 13     | 46     | 58    | 13      | 45      | A    | 0           | 374916.485   | -0.017                     | 464.0339  |
| 65   | 8      | 57     | 64    | 8       | 56      | A    | 1           | 375385.611   | -0.039                     | 632.3740  |
| 65   | 8      | 57     | 64    | 9       | 56      | A    | 1           | 375385.611   | -0.037                     | 632.3740  |
| 65   | 9      | 57     | 64    | 8       | 56      | A    | 1           | 375385.611   | -0.039                     | 632.3740  |
| 65   | 9      | 57     | 64    | 9       | 56      | A    | 1           | 375385.611   | -0.038                     | 632.3740  |
| 64   | 9      | 55     | 63    | 9       | 54      | A    | 1           | 375402.256   | 0.016                      | 628.0008  |
| 64   | 9      | 55     | 63    | 10      | 54      | A    | 1           | 375402.256   | 0.058                      | 628.0008  |
| 64   | 10     | 55     | 63    | 9       | 54      | A    | 1           | 375402.256   | -0.006                     | 628.0008  |
| 64   | 10     | 55     | 63    | 10      | 54      | A    | 1           | 375402.256   | 0.036                      | 628.0008  |
| 66   | 7      | 59     | 65    | 7       | 58      | A    | 1           | 375448.696   | -0.101                     | 636.2698  |
| 66   | 7      | 59     | 65    | 8       | 58      | A    | 1           | 375448.696   | -0.101                     | 636.2698  |
| 66   | 8      | 59     | 65    | 7       | 58      | A    | 1           | 375448.696   | -0.101                     | 636.2698  |
| 66   | 8      | 59     | 65    | 8       | 58      | A    | 1           | 375448.696   | -0.101                     | 636.2698  |
| 65   | 8      | 57     | 64    | 8       | 56      | E    | 1           | 375525.742   | 0.005                      | 632.3201  |
| 65   | 8      | 57     | 64    | 9       | 56      | E    | 1           | 375525.742   | 0.006                      | 632.3201  |
| 65   | 9      | 57     | 64    | 8       | 56      | E    | 1           | 375525.742   | 0.004                      | 632.3201  |
| 65   | 9      | 57     | 64    | 9       | 56      | E    | 1           | 375525.742   | 0.005                      | 632.3201  |
| 63   | 10     | 53     | 62    | 11      | 52      | A    | 1           | 375541.330   | 0.200                      | 623.1227  |
| 63   | 11     | 53     | 62    | 10      | 52      | A    | 1           | 375542.850   | -0.001                     | 623.1227  |
| 64   | 9      | 55     | 63    | 9       | 54      | E    | 1           | 375554.184   | -0.011                     | 627.9569  |
| 64   | 9      | 55     | 63    | 10      | 54      | E    | 1           | 375554.184   | 0.042                      | 627.9569  |
| 64   | 10     | 55     | 63    | 9       | 54      | E    | 1           | 375554.184   | -0.039                     | 627.9569  |
| 64   | 10     | 55     | 63    | 10      | 54      | E    | 1           | 375554.184   | 0.014                      | 627.9569  |
| 67   | 6      | 61     | 66    | 6       | 60      | A    | 1           | 375565.185   | -0.158                     | 639.7086  |
| 67   | 6      | 61     | 66    | 7       | 60      | A    | 1           | 375565.185   | -0.158                     | 639.7086  |
| 67   | 7      | 61     | 66    | 6       | 60      | A    | 1           | 375565.185   | -0.158                     | 639.7086  |
| 67   | 7      | 61     | 66    | 7       | 60      | A    | 1           | 375565.185   | -0.158                     | 639.7086  |
| 60   | 24     | 37     | 59    | 24      | 36      | A    | 0           | 375574.770   | -0.008                     | 542.7276  |
| 66   | 7      | 59     | 65    | 7       | 58      | E    | 1           | 375578.344   | -0.003                     | 636.2011  |
| 66   | 7      | 59     | 65    | 8       | 58      | E    | 1           | 375578.344   | -0.003                     | 636.2011  |
| 66   | 8      | 59     | 65    | 7       | 58      | E    | 1           | 375578.344   | -0.003                     | 636.2011  |
| 66   | 8      | 59     | 65    | 8       | 58      | E    | 1           | 375578.344   | -0.003                     | 636.2011  |
| 65   | 8      | 57     | 64    | 8       | 56      | E    | 0           | 375614.721   | -0.027                     | 504.0517  |
| 65   | 9      | 57     | 64    | 9       | 56      | E    | 0           | 375614.721   | -0.026                     | 504.0517  |
| 65   | 8      | 57     | 64    | 8       | 56      | A    | 0           | 375619.091   | -0.007                     | 504.0499  |
| 65   | 8      | 57     | 64    | 9       | 56      | A    | 0           | 375619.091   | -0.006                     | 504.0499  |
| 65   | 9      | 57     | 64    | 8       | 56      | A    | 0           | 375619.091   | -0.008                     | 504.0499  |
| 65   | 9      | 57     | 64    | 9       | 56      | A    | 0           | 375619.091   | -0.007                     | 504.0499  |
| 64   | 9      | 55     | 63    | 9       | 54      | E    | 0           | 375642.150   | 0.027                      | 499.6902  |
| 64   | 10     | 55     | 63    | 10      | 54      | E    | 0           | 375642.150   | 0.049                      | 499.6902  |
| 64   | 9      | 55     | 63    | 9       | 54      | A    | 0           | 375646.842   | -0.007                     | 499.6887  |
| 64   | 9      | 55     | 63    | 10      | 54      | A    | 0           | 375646.842   | 0.041                      | 499.6887  |
| 64   | 10     | 55     | 63    | 9       | 54      | A    | 0           | 375646.842   | -0.032                     | 499.6887  |
| 64   | 10     | 55     | 63    | 10      | 54      | A    | 0           | 375646.842   | 0.016                      | 499.6887  |
| 70   | 34     | 36     | 70    | 33      | 37      | A    | 0           | 375650.089   | -0.001                     | 786.6525  |
| 70   | 34     | 37     | 70    | 33      | 38      | A    | 0           | 375650.089   | -0.001                     | 786.6525  |
| 66   | 7      | 59     | 65    | 7       | 58      | E    | 0           | 375667.509   | 0.007                      | 507.9322  |
| 66   | 8      | 59     | 65    | 8       | 58      | E    | 0           | 375667.509   | 0.007                      | 507.9322  |
| 66   | 7      | 59     | 65    | 7       | 58      | A    | 0           | 375671.525   | 0.007                      | 507.9300  |
| 66   | 7      | 59     | 65    | 8       | 58      | A    | 0           | 375671.525   | 0.007                      | 507.9300  |
| 66   | 8      | 59     | 65    | 7       | 58      | A    | 0           | 375671.525   | 0.007                      | 507.9300  |
| 66   | 8      | 59     | 65    | 8       | 58      | A    | 0           | 375671.525   | 0.007                      | 507.9300  |
| 67   | 6      | 61     | 66    | 6       | 60      | E    | 1           | 375684.490   | -0.002                     | 639.6199  |
| 67   | 6      | 61     | 66    | 7       | 60      | E    | 1           | 375684.490   | -0.002                     | 639.6199  |
| 67   | 7      | 61     | 66    | 6       | 60      | E    | 1           | 375684.490   | -0.002                     | 639.6199  |
| 67   | 7      | 61     | 66    | 7       | 60      | E    | 1           | 375684.490   | -0.002                     | 639.6199  |
| 23   | 21     | 2      | 22    | 20      | 2       | E    | 0           | 375696.573   | -0.025                     | 195.4241  |
| 63   | 10     | 53     | 62    | 11      | 52      | E    | 1           | 375707.953   | 0.091                      | 623.0837  |
| 68   | 5      | 63     | 67    | 5       | 62      | A    | 1           | 375718.335   | -0.128                     | 642.7061  |
| 68   | 5      | 63     | 67    | 6       | 62      | A    | 1           | 375718.335   | -0.128                     | 642.7061  |
| 68   | 6      | 63     | 67    | 5       | 62      | A    | 1           | 375718.335   | -0.128                     | 642.7061  |



| $J'$ | $K'_a$ | $K'_c$ | $J''$ | $K''_a$ | $K''_c$ | Sym. | $v_{tCH_3}$ | $\nu_{Obs.}$ | $\nu_{Obs.} - \nu_{Calc.}$ | $E_{low}$ |
|------|--------|--------|-------|---------|---------|------|-------------|--------------|----------------------------|-----------|
| 68   | 6      | 63     | 67    | 6       | 62      | A    | 1           | 375718.335   | -0.128                     | 642.7061  |
| 23   | 21     | 3      | 22    | 20      | 3       | E    | 0           | 375730.406   | 0.046                      | 195.4138  |
| 23   | 21     | 3      | 22    | 20      | 2       | A    | 0           | 375742.310   | -0.063                     | 195.4269  |
| 23   | 21     | 2      | 22    | 20      | 3       | A    | 0           | 375742.310   | -0.063                     | 195.4269  |
| 67   | 6      | 61     | 66    | 6       | 60      | E    | 0           | 375773.302   | -0.039                     | 511.3520  |
| 67   | 7      | 61     | 66    | 7       | 60      | E    | 0           | 375773.302   | -0.039                     | 511.3520  |
| 67   | 6      | 61     | 66    | 6       | 60      | A    | 0           | 375777.057   | 0.030                      | 511.3491  |
| 67   | 6      | 61     | 66    | 7       | 60      | A    | 0           | 375777.057   | 0.030                      | 511.3491  |
| 67   | 7      | 61     | 66    | 6       | 60      | A    | 0           | 375777.057   | 0.030                      | 511.3491  |
| 67   | 7      | 61     | 66    | 7       | 60      | A    | 0           | 375777.057   | 0.030                      | 511.3491  |
| 68   | 5      | 63     | 67    | 5       | 62      | E    | 1           | 375826.638   | 0.229                      | 642.5917  |
| 68   | 5      | 63     | 67    | 6       | 62      | E    | 1           | 375826.638   | 0.229                      | 642.5917  |
| 68   | 6      | 63     | 67    | 5       | 62      | E    | 1           | 375826.638   | 0.229                      | 642.5917  |
| 68   | 6      | 63     | 67    | 6       | 62      | E    | 1           | 375826.638   | 0.229                      | 642.5917  |
| 62   | 11     | 51     | 61    | 12      | 50      | A    | 1           | 375864.805   | 0.226                      | 617.7005  |
| 69   | 4      | 65     | 68    | 4       | 64      | A    | 1           | 375896.917   | -0.123                     | 645.2746  |
| 69   | 4      | 65     | 68    | 5       | 64      | A    | 1           | 375896.917   | -0.123                     | 645.2746  |
| 69   | 5      | 65     | 68    | 4       | 64      | A    | 1           | 375896.917   | -0.123                     | 645.2746  |
| 69   | 5      | 65     | 68    | 5       | 64      | A    | 1           | 375896.917   | -0.123                     | 645.2746  |
| 62   | 12     | 51     | 61    | 11      | 50      | A    | 1           | 375901.138   | 0.228                      | 617.6997  |
| 68   | 5      | 63     | 67    | 5       | 62      | E    | 0           | 375914.859   | 0.000                      | 514.3261  |
| 68   | 6      | 63     | 67    | 6       | 62      | E    | 0           | 375914.859   | 0.000                      | 514.3261  |
| 68   | 5      | 63     | 67    | 5       | 62      | A    | 0           | 375918.227   | 0.038                      | 514.3225  |
| 68   | 5      | 63     | 67    | 6       | 62      | A    | 0           | 375918.227   | 0.038                      | 514.3225  |
| 68   | 6      | 63     | 67    | 5       | 62      | A    | 0           | 375918.227   | 0.038                      | 514.3225  |
| 68   | 6      | 63     | 67    | 6       | 62      | A    | 0           | 375918.227   | 0.038                      | 514.3225  |
| 69   | 4      | 65     | 68    | 4       | 64      | E    | 1           | 375992.155   | 0.030                      | 645.1282  |
| 69   | 4      | 65     | 68    | 5       | 64      | E    | 1           | 375992.155   | 0.030                      | 645.1282  |
| 69   | 5      | 65     | 68    | 4       | 64      | E    | 1           | 375992.155   | 0.030                      | 645.1282  |
| 69   | 5      | 65     | 68    | 5       | 64      | E    | 1           | 375992.155   | 0.030                      | 645.1282  |
| 69   | 34     | 35     | 69    | 33      | 36      | A    | 0           | 376065.086   | 0.132                      | 772.1366  |
| 69   | 34     | 36     | 69    | 33      | 37      | A    | 0           | 376065.086   | 0.132                      | 772.1366  |
| 69   | 4      | 65     | 68    | 4       | 64      | E    | 0           | 376080.414   | 0.026                      | 516.8666  |
| 69   | 5      | 65     | 68    | 5       | 64      | E    | 0           | 376080.414   | 0.026                      | 516.8666  |
| 69   | 4      | 65     | 68    | 4       | 64      | A    | 0           | 376083.346   | 0.033                      | 516.8620  |
| 69   | 4      | 65     | 68    | 5       | 64      | A    | 0           | 376083.346   | 0.033                      | 516.8620  |
| 69   | 5      | 65     | 68    | 4       | 64      | A    | 0           | 376083.346   | 0.033                      | 516.8620  |
| 69   | 5      | 65     | 68    | 5       | 64      | A    | 0           | 376083.346   | 0.033                      | 516.8620  |
| 70   | 3      | 67     | 69    | 4       | 66      | A    | 1           | 376093.362   | -0.216                     | 647.4242  |
| 70   | 3      | 67     | 69    | 4       | 66      | A    | 1           | 376093.362   | -0.216                     | 647.4242  |
| 70   | 3      | 67     | 69    | 4       | 66      | A    | 1           | 376093.362   | -0.216                     | 647.4242  |
| 70   | 4      | 67     | 69    | 3       | 66      | A    | 1           | 376093.362   | -0.216                     | 647.4242  |
| 62   | 11     | 51     | 61    | 12      | 50      | E    | 0           | 376129.964   | -0.193                     | 489.4024  |
| 62   | 11     | 51     | 61    | 12      | 50      | A    | 0           | 376135.873   | -0.032                     | 489.4011  |
| 70   | 3      | 67     | 69    | 3       | 66      | E    | 1           | 376173.403   | 0.117                      | 647.2388  |
| 70   | 3      | 67     | 69    | 4       | 66      | E    | 1           | 376173.403   | 0.117                      | 647.2388  |
| 70   | 4      | 67     | 69    | 3       | 66      | E    | 1           | 376173.403   | 0.117                      | 647.2388  |
| 70   | 4      | 67     | 69    | 4       | 66      | E    | 1           | 376173.403   | 0.117                      | 647.2388  |
| 62   | 12     | 51     | 61    | 11      | 50      | A    | 1           | 376176.067   | -0.014                     | 489.4003  |
| 70   | 3      | 67     | 69    | 3       | 66      | E    | 0           | 376261.896   | 0.025                      | 518.9829  |
| 70   | 4      | 67     | 69    | 4       | 66      | E    | 0           | 376261.896   | 0.025                      | 518.9829  |
| 70   | 3      | 67     | 69    | 4       | 66      | A    | 0           | 376264.338   | 0.021                      | 518.9771  |
| 70   | 4      | 67     | 69    | 3       | 66      | A    | 0           | 376264.338   | 0.021                      | 518.9771  |
| 60   | 23     | 38     | 59    | 23      | 37      | A    | 0           | 376380.549   | -0.119                     | 534.1251  |
| 60   | 23     | 38     | 59    | 23      | 37      | E    | 0           | 376384.926   | 0.186                      | 534.1130  |
| 68   | 34     | 34     | 68    | 33      | 35      | A    | 0           | 376461.490   | 0.067                      | 757.8341  |
| 68   | 34     | 35     | 68    | 33      | 36      | A    | 0           | 376461.490   | 0.067                      | 757.8341  |
| 59   | 18     | 42     | 58    | 18      | 41      | E    | 0           | 376543.272   | -0.024                     | 485.4703  |
| 25   | 20     | 5      | 24    | 19      | 5       | E    | 0           | 376553.401   | -0.049                     | 197.6535  |
| 61   | 12     | 49     | 60    | 13      | 48      | E    | 0           | 376556.561   | 0.067                      | 483.3795  |
| 61   | 12     | 49     | 60    | 13      | 48      | A    | 0           | 376561.914   | 0.025                      | 483.3780  |
| 25   | 20     | 6      | 24    | 19      | 6       | E    | 0           | 376583.085   | 0.025                      | 197.6423  |
| 25   | 20     | 5      | 24    | 19      | 6       | A    | 0           | 376600.310   | -0.054                     | 197.6548  |
| 25   | 20     | 6      | 24    | 19      | 5       | A    | 0           | 376600.310   | -0.054                     | 197.6548  |
| 61   | 13     | 49     | 60    | 13      | 48      | E    | 1           | 376723.507   | 0.216                      | 611.6307  |
| 67   | 34     | 33     | 67    | 33      | 34      | A    | 0           | 376840.163   | 0.003                      | 743.7449  |
| 67   | 34     | 34     | 67    | 33      | 35      | A    | 0           | 376840.163   | 0.003                      | 743.7449  |
| 67   | 34     | 34     | 67    | 33      | 35      | E    | 0           | 376843.997   | -0.109                     | 743.7324  |
| 67   | 34     | 33     | 67    | 33      | 34      | E    | 0           | 376881.971   | 0.416                      | 743.7395  |
| 39   | 13     | 26     | 38    | 12      | 27      | A    | 0           | 377171.015   | -0.059                     | 249.0220  |
| 61   | 13     | 49     | 60    | 12      | 48      | E    | 0           | 377192.638   | -0.051                     | 483.3662  |
| 61   | 13     | 49     | 60    | 12      | 48      | A    | 0           | 377201.437   | 0.178                      | 483.3647  |
| 39   | 13     | 26     | 38    | 12      | 27      | E    | 0           | 377206.932   | 0.030                      | 249.0252  |
| 60   | 22     | 39     | 59    | 22      | 38      | A    | 0           | 377328.079   | 0.018                      | 525.9597  |
| 60   | 22     | 38     | 59    | 22      | 37      | E    | 0           | 377333.026   | 0.057                      | 525.9560  |
| 27   | 19     | 8      | 26    | 18      | 8       | E    | 0           | 377383.193   | -0.051                     | 201.1116  |
| 27   | 19     | 9      | 26    | 18      | 9       | E    | 0           | 377408.267   | 0.029                      | 201.0995  |
| 27   | 19     | 9      | 26    | 18      | 8       | A    | 0           | 377430.613   | -0.035                     | 201.1112  |
| 27   | 19     | 8      | 26    | 18      | 9       | A    | 0           | 377430.613   | -0.035                     | 201.1112  |
| 65   | 34     | 31     | 65    | 33      | 32      | A    | 0           | 377546.903   | -0.054                     | 716.2049  |
| 65   | 34     | 32     | 65    | 33      | 33      | A    | 0           | 377546.903   | -0.054                     | 716.2049  |
| 61   | 33     | 29     | 60    | 33      | 28      | A    | 0           | 377865.692   | -0.264                     | 651.0674  |
| 61   | 33     | 28     | 60    | 33      | 27      | A    | 0           | 377865.692   | -0.264                     | 651.0674  |
| 61   | 33     | 28     | 60    | 33      | 27      | E    | 0           | 377865.692   | -0.069                     | 651.0621  |
| 61   | 33     | 29     | 60    | 33      | 28      | E    | 0           | 377867.286   | -0.282                     | 651.0544  |
| 64   | 34     | 30     | 64    | 33      | 31      | A    | 0           | 377876.225   | -0.002                     | 702.7537  |
| 64   | 34     | 31     | 64    | 33      | 32      | A    | 0           | 377876.225   | -0.002                     | 702.7537  |
| 64   | 34     | 31     | 64    | 33      | 32      | E    | 0           | 377880.945   | -0.165                     | 702.7409  |
| 64   | 34     | 30     | 64    | 33      | 31      | E    | 0           | 377918.510   | 0.146                      | 702.7483  |
| 29   | 18     | 11     | 28    | 17      | 11      | E    | 0           | 378154.298   | -0.063                     | 205.8106  |
| 29   | 18     | 12     | 28    | 17      | 12      | E    | 0           | 378174.287   | -0.004                     | 205.7979  |
| 63   | 34     | 29     | 63    | 33      | 30      | A    | 0           | 378189.986   | -0.194                     | 689.5145  |
| 63   | 34     | 30     | 63    | 33      | 31      | A    | 0           | 378189.986   | -0.194                     | 689.5145  |
| 63   | 34     | 30     | 63    | 33      | 31      | E    | 0           | 378195.162   | -0.187                     | 689.5017  |
| 29   | 18     | 11     | 28    | 17      | 12      | A    | 0           | 378201.545   | -0.040                     | 205.8086  |
| 29   | 18     | 12     | 28    | 17      | 11      | A    | 0           | 378201.545   | -0.040                     | 205.8086  |
| 63   | 34     | 29     | 63    | 33      | 30      | E    | 0           | 378232.458   | -0.080                     | 689.5092  |
| 56   | 14     | 43     | 55    | 13      | 42      | E    | 0           | 378261.139   | 0.011                      | 427.3199  |
| 40   | 13     | 28     | 39    | 12      | 27      | E    | 0           | 378364.248   | 0.017                      | 257.4323  |
| 59   | 17     | 43     | 58    | 17      | 42      | A    | 0           | 378387.452   | -0.126                     | 479.7269  |
| 37   | 14     | 24     | 36    | 13      | 24      | E    | 0           | 378498.296   | 0.311                      | 237.5460  |
| 37   | 14     | 24     | 36    | 13      | 23      | A    | 0           | 378500.599   | -0.046                     | 237.5518  |
| 62   | 34     | 28     | 62    | 33      | 29      | E    | 0           | 378531.944   | 0.005                      | 676.4819  |
| 37   | 14     | 23     | 36    | 13      | 24      | A    | 0           | 378581.581   | -0.039                     | 237.5495  |
| 57   | 15     | 42     | 56    | 15      | 41      | A    | 0           | 378644.218   | -0.018                     | 446.2765  |
| 57   | 15     | 42     | 56    | 15      | 41      | E    | 0           | 378655.265   | -0.029                     | 446.2810  |
| 61   | 34     | 27     | 61    | 33      | 28      | A    | 0           | 378774.291   | -0.050                     | 663.6716  |
| 61   | 34     | 28     | 61    | 33      | 29      | A    | 0           | 378774.291   | -0.050                     | 663.6716  |
| 61   | 34     | 28     | 61    | 33      | 29      | E    | 0           | 378780.039   | -0.003                     | 663.6587  |
| 31   | 17     | 14     | 30    | 16      | 14      | E    | 0           | 378810.803   | -0.054                     | 211.7689  |
| 31   | 17     | 15     | 30    | 16      | 15      | E    | 0           | 378825.281   | 0.011                      | 211.7557  |
| 31   | 17     | 15     | 30    | 16      | 14      | A    | 0           | 378857.188   | -0.033                     | 211.7653  |
| 31   | 17     | 14     | 30    | 16      | 15      | A    | 0           | 378857.188   | -0.033                     | 211.7653  |
| 59   | 16     | 44     | 58    | 16      | 43      | A    | 0           | 379022.561   | -0.102                     | 474.4535  |
| 59   | 16     | 44     | 58    | 16      | 43      | E    | 0           | 379026.448   | -0.031                     | 474.4544  |
| 60   | 34     | 26     | 60    | 33      | 27      | E    | 0           | 379088.500   | -0.052                     | 651.0621  |



| $J'$ | $K'_a$ | $K'_c$ | $J''$ | $K''_a$ | $K''_c$ | Sym. | $v_{tCH_3}$ | $\nu_{Obs.}$ | $\nu_{Obs.} - \nu_{Calc.}$ | $E_{low}$ |
|------|--------|--------|-------|---------|---------|------|-------------|--------------|----------------------------|-----------|
| 60   | 13     | 47     | 59    | 13      | 46      | E    | 0           | 379207.199   | -0.040                     | 476.5421  |
| 60   | 13     | 47     | 59    | 13      | 46      | A    | 0           | 379219.477   | -0.048                     | 476.5397  |
| 33   | 16     | 17     | 32    | 15      | 17      | E    | 0           | 379251.627   | -0.036                     | 219.0135  |
| 33   | 16     | 18     | 32    | 15      | 18      | E    | 0           | 379259.999   | -0.026                     | 219.0001  |
| 35   | 15     | 20     | 34    | 14      | 20      | E    | 0           | 379284.338   | -0.047                     | 227.5866  |
| 35   | 15     | 21     | 34    | 14      | 21      | E    | 0           | 379285.928   | -0.010                     | 227.5733  |
| 33   | 16     | 18     | 32    | 15      | 17      | A    | 0           | 379296.441   | -0.022                     | 219.0082  |
| 59   | 34     | 25     | 59    | 33      | 26      | A    | 0           | 379303.544   | -0.118                     | 638.6743  |
| 59   | 34     | 26     | 59    | 33      | 27      | A    | 0           | 379303.544   | -0.118                     | 638.6743  |
| 59   | 34     | 26     | 59    | 33      | 27      | E    | 0           | 379309.686   | -0.161                     | 638.6612  |
| 35   | 15     | 21     | 34    | 14      | 20      | A    | 0           | 379326.142   | -0.123                     | 227.5798  |
| 35   | 15     | 20     | 34    | 14      | 21      | A    | 0           | 379327.555   | 0.005                      | 227.5798  |
| 59   | 34     | 25     | 59    | 33      | 26      | E    | 0           | 379346.782   | -0.002                     | 638.6690  |
| 59   | 14     | 46     | 58    | 13      | 45      | E    | 0           | 379392.258   | -0.002                     | 464.0367  |
| 59   | 14     | 46     | 58    | 13      | 45      | A    | 0           | 379424.449   | 0.116                      | 464.0339  |
| 58   | 34     | 24     | 58    | 33      | 25      | A    | 0           | 379548.992   | -0.013                     | 626.4921  |
| 58   | 34     | 25     | 58    | 33      | 26      | A    | 0           | 379548.992   | -0.013                     | 626.4921  |
| 58   | 34     | 24     | 58    | 33      | 25      | E    | 0           | 379592.322   | 0.032                      | 626.4868  |
| 57   | 34     | 23     | 57    | 33      | 24      | A    | 0           | 379782.038   | -0.067                     | 614.5206  |
| 57   | 34     | 24     | 57    | 33      | 25      | A    | 0           | 379782.038   | -0.067                     | 614.5206  |
| 57   | 34     | 24     | 57    | 33      | 25      | E    | 0           | 379788.620   | -0.108                     | 614.5074  |
| 57   | 34     | 23     | 57    | 33      | 24      | E    | 0           | 379825.633   | 0.090                      | 614.5153  |
| 60   | 20     | 41     | 59    | 20      | 40      | A    | 0           | 379842.390   | -0.001                     | 511.0005  |
| 60   | 20     | 40     | 59    | 20      | 39      | E    | 0           | 379858.178   | -0.057                     | 511.0006  |
| 60   | 20     | 40     | 59    | 20      | 39      | A    | 0           | 379860.934   | 0.017                      | 511.0012  |
| 56   | 34     | 22     | 56    | 33      | 23      | A    | 0           | 380003.390   | -0.027                     | 602.7595  |
| 56   | 34     | 23     | 56    | 33      | 24      | A    | 0           | 380003.390   | -0.027                     | 602.7595  |
| 56   | 34     | 23     | 56    | 33      | 24      | E    | 0           | 380010.108   | -0.135                     | 602.7463  |
| 56   | 34     | 22     | 56    | 33      | 23      | E    | 0           | 380046.972   | -0.027                     | 602.7542  |
| 55   | 34     | 21     | 55    | 33      | 22      | A    | 0           | 380213.290   | -0.100                     | 591.2087  |
| 55   | 34     | 22     | 55    | 33      | 23      | A    | 0           | 380213.290   | -0.100                     | 591.2087  |
| 55   | 34     | 22     | 55    | 33      | 23      | E    | 0           | 380220.356   | -0.051                     | 591.1955  |
| 55   | 34     | 21     | 55    | 33      | 22      | E    | 0           | 380257.010   | -0.095                     | 591.2034  |
| 58   | 16     | 42     | 57    | 16      | 41      | A    | 0           | 380392.453   | -0.047                     | 462.6041  |
| 54   | 34     | 21     | 54    | 33      | 22      | E    | 0           | 380419.618   | -0.033                     | 579.8547  |
| 54   | 34     | 20     | 54    | 33      | 21      | E    | 0           | 380456.323   | 0.032                      | 579.8626  |
| 66   | 8      | 58     | 65    | 8       | 57      | A    | 1           | 380491.564   | -0.037                     | 644.8955  |
| 66   | 8      | 58     | 65    | 8       | 57      | A    | 1           | 380491.564   | -0.037                     | 644.8955  |
| 66   | 9      | 58     | 65    | 8       | 57      | A    | 1           | 380491.564   | -0.038                     | 644.8955  |
| 66   | 9      | 58     | 65    | 9       | 57      | A    | 1           | 380491.564   | -0.037                     | 644.8955  |
| 65   | 9      | 56     | 64    | 9       | 55      | A    | 1           | 380496.771   | 0.037                      | 640.5229  |
| 65   | 9      | 56     | 64    | 9       | 55      | A    | 1           | 380496.771   | 0.059                      | 640.5229  |
| 65   | 10     | 56     | 64    | 9       | 55      | A    | 1           | 380496.771   | 0.025                      | 640.5229  |
| 65   | 10     | 56     | 64    | 10      | 55      | A    | 1           | 380496.771   | 0.047                      | 640.5229  |
| 67   | 7      | 60     | 66    | 7       | 59      | A    | 1           | 380561.370   | -0.076                     | 648.7934  |
| 67   | 7      | 60     | 66    | 8       | 59      | A    | 1           | 380561.370   | -0.076                     | 648.7934  |
| 67   | 7      | 60     | 66    | 8       | 59      | A    | 1           | 380561.370   | -0.076                     | 648.7934  |
| 67   | 8      | 60     | 66    | 7       | 59      | A    | 1           | 380561.370   | -0.076                     | 648.7934  |
| 53   | 34     | 19     | 53    | 33      | 20      | A    | 0           | 380600.909   | -0.113                     | 568.7369  |
| 53   | 34     | 20     | 53    | 33      | 21      | A    | 0           | 380600.909   | -0.113                     | 568.7369  |
| 53   | 34     | 20     | 53    | 33      | 21      | E    | 0           | 380608.129   | -0.265                     | 568.7237  |
| 66   | 8      | 58     | 65    | 8       | 57      | E    | 1           | 380629.509   | 0.010                      | 644.8463  |
| 66   | 8      | 58     | 65    | 9       | 57      | E    | 1           | 380629.509   | 0.011                      | 644.8463  |
| 66   | 9      | 58     | 65    | 8       | 57      | E    | 1           | 380629.509   | 0.010                      | 644.8463  |
| 66   | 9      | 58     | 65    | 9       | 57      | E    | 1           | 380629.509   | 0.010                      | 644.8463  |
| 65   | 9      | 56     | 64    | 9       | 55      | E    | 1           | 380645.754   | -0.002                     | 640.4840  |
| 65   | 9      | 56     | 64    | 10      | 55      | E    | 1           | 380645.754   | 0.026                      | 640.4840  |
| 65   | 10     | 56     | 64    | 9       | 55      | E    | 1           | 380645.754   | -0.017                     | 640.4840  |
| 65   | 10     | 56     | 64    | 10      | 55      | E    | 1           | 380645.754   | 0.011                      | 640.4840  |
| 68   | 6      | 62     | 67    | 6       | 61      | A    | 1           | 380681.795   | -0.136                     | 652.2362  |
| 68   | 6      | 62     | 67    | 7       | 61      | A    | 1           | 380681.795   | -0.136                     | 652.2362  |
| 68   | 7      | 62     | 67    | 6       | 61      | A    | 1           | 380681.795   | -0.136                     | 652.2362  |
| 68   | 7      | 62     | 67    | 7       | 61      | A    | 1           | 380681.795   | -0.136                     | 652.2362  |
| 67   | 7      | 60     | 66    | 7       | 59      | E    | 1           | 380689.329   | -0.033                     | 648.7290  |
| 67   | 7      | 60     | 66    | 8       | 59      | E    | 1           | 380689.329   | -0.032                     | 648.7290  |
| 67   | 8      | 60     | 66    | 7       | 59      | E    | 1           | 380689.329   | -0.033                     | 648.7290  |
| 67   | 8      | 60     | 66    | 8       | 59      | E    | 1           | 380689.329   | -0.033                     | 648.7290  |
| 66   | 8      | 58     | 65    | 8       | 57      | E    | 0           | 380721.102   | -0.027                     | 516.5808  |
| 66   | 9      | 58     | 65    | 9       | 57      | E    | 0           | 380721.102   | -0.027                     | 516.5808  |
| 66   | 8      | 58     | 65    | 8       | 57      | A    | 0           | 380725.402   | -0.010                     | 516.5792  |
| 66   | 8      | 58     | 65    | 9       | 57      | A    | 0           | 380725.402   | -0.009                     | 516.5792  |
| 66   | 9      | 58     | 65    | 8       | 57      | A    | 0           | 380725.402   | -0.010                     | 516.5792  |
| 66   | 9      | 58     | 65    | 9       | 57      | A    | 0           | 380725.402   | -0.009                     | 516.5792  |
| 65   | 9      | 56     | 64    | 9       | 55      | E    | 0           | 380736.602   | -0.028                     | 512.2202  |
| 65   | 10     | 56     | 64    | 10      | 55      | E    | 0           | 380736.602   | -0.016                     | 512.2202  |
| 65   | 9      | 56     | 64    | 9       | 55      | A    | 0           | 380741.243   | -0.023                     | 512.2190  |
| 65   | 9      | 56     | 64    | 10      | 55      | A    | 0           | 380741.243   | 0.003                      | 512.2190  |
| 65   | 10     | 56     | 64    | 9       | 55      | A    | 0           | 380741.243   | -0.036                     | 512.2190  |
| 65   | 10     | 56     | 64    | 10      | 55      | A    | 0           | 380741.243   | -0.011                     | 512.2190  |
| 61   | 26     | 35     | 60    | 26      | 34      | A    | 0           | 380752.503   | -0.010                     | 573.6890  |
| 61   | 26     | 36     | 60    | 26      | 35      | A    | 0           | 380752.503   | -0.010                     | 573.6890  |
| 61   | 26     | 36     | 60    | 26      | 35      | E    | 0           | 380754.664   | -0.111                     | 573.6771  |
| 61   | 26     | 35     | 60    | 26      | 34      | E    | 0           | 380756.219   | 0.028                      | 573.6799  |
| 67   | 7      | 60     | 66    | 7       | 59      | E    | 0           | 380780.876   | -0.008                     | 520.4631  |
| 67   | 8      | 60     | 66    | 8       | 59      | E    | 0           | 380780.876   | -0.008                     | 520.4631  |
| 67   | 7      | 60     | 66    | 7       | 59      | A    | 0           | 380784.860   | 0.009                      | 520.4611  |
| 67   | 7      | 60     | 66    | 8       | 59      | A    | 0           | 380784.860   | 0.009                      | 520.4611  |
| 67   | 8      | 60     | 66    | 7       | 59      | A    | 0           | 380784.860   | 0.009                      | 520.4611  |
| 67   | 8      | 60     | 66    | 8       | 59      | A    | 0           | 380784.860   | 0.009                      | 520.4611  |
| 68   | 6      | 62     | 67    | 6       | 61      | E    | 1           | 380799.871   | -0.018                     | 652.1514  |
| 68   | 6      | 62     | 67    | 7       | 61      | E    | 1           | 380799.871   | -0.018                     | 652.1514  |
| 68   | 7      | 62     | 67    | 6       | 61      | E    | 1           | 380799.871   | -0.018                     | 652.1514  |
| 68   | 7      | 62     | 67    | 7       | 61      | E    | 1           | 380799.871   | -0.018                     | 652.1514  |
| 61   | 13     | 48     | 60    | 14      | 47      | A    | 0           | 380813.407   | -0.140                     | 489.2853  |
| 61   | 13     | 48     | 60    | 14      | 47      | E    | 0           | 380814.971   | 0.090                      | 489.2869  |
| 69   | 5      | 64     | 68    | 5       | 63      | A    | 1           | 380837.211   | -0.143                     | 655.2387  |
| 69   | 5      | 64     | 68    | 6       | 63      | A    | 1           | 380837.211   | -0.143                     | 655.2387  |
| 69   | 6      | 64     | 68    | 5       | 63      | A    | 1           | 380837.211   | -0.143                     | 655.2387  |
| 69   | 6      | 64     | 68    | 6       | 63      | A    | 1           | 380837.211   | -0.143                     | 655.2387  |
| 55   | 14     | 42     | 54    | 13      | 41      | E    | 0           | 380842.023   | 0.005                      | 415.3378  |
| 68   | 6      | 62     | 67    | 6       | 61      | E    | 0           | 380891.005   | 0.109                      | 523.8864  |
| 68   | 7      | 62     | 67    | 7       | 61      | E    | 0           | 380891.005   | 0.109                      | 523.8864  |
| 68   | 6      | 62     | 67    | 6       | 61      | A    | 0           | 380894.592   | 0.047                      | 523.8837  |
| 68   | 6      | 62     | 67    | 7       | 61      | A    | 0           | 380894.592   | 0.047                      | 523.8837  |
| 68   | 7      | 62     | 67    | 6       | 61      | A    | 0           | 380894.592   | 0.047                      | 523.8837  |
| 68   | 7      | 62     | 67    | 7       | 61      | A    | 0           | 380894.592   | 0.047                      | 523.8837  |
| 63   | 11     | 52     | 62    | 12      | 51      | A    | 1           | 380909.803   | 0.094                      | 630.2384  |
| 63   | 12     | 52     | 62    | 12      | 51      | A    | 1           | 380917.352   | 0.208                      | 630.2384  |
| 69   | 5      | 64     | 68    | 5       | 63      | E    | 1           | 380944.485   | 0.014                      | 655.1279  |
| 69   | 5      | 64     | 68    | 6       | 63      | E    | 1           | 380944.485   | 0.014                      | 655.1279  |
| 69   | 6      | 64     | 68    | 5       | 63      | E    | 1           | 380944.485   | 0.014                      | 655.1279  |
| 69   | 6      | 64     | 68    | 6       | 63      | E    | 1           | 380944.485   | 0.014                      | 655.1279  |
| 22   | 22     | 0      | 21    | 21      | 0       | E    | 0           | 380975.401   | -0.018                     | 198.7216  |
| 22   | 22     | 1      | 21    | 21      | 1       | E    | 0           | 381013.011   | 0.187                      | 198.7125  |
| 70   | 4      | 66     | 69    | 4       | 65      | A    | 1           | 381017.202   | -0.053                     | 657.8132  |
| 70   | 4      | 66     | 69    | 5       | 65      | A    | 1           | 381017.202   | -0.053                     | 657.8132  |



| $J'$ | $K'_a$ | $K'_c$ | $J''$ | $K''_a$ | $K''_c$ | Sym. | $v_{tCH_3}$ | $\nu_{Obs.}$ | $\nu_{Obs.} - \nu_{Calc.}$ | $E_{low}$ |
|------|--------|--------|-------|---------|---------|------|-------------|--------------|----------------------------|-----------|
| 70   | 5      | 66     | 69    | 4       | 65      | A    | 1           | 381017.202   | -0.053                     | 657.8132  |
| 70   | 5      | 66     | 69    | 5       | 65      | A    | 1           | 381017.202   | -0.053                     | 657.8132  |
| 22   | 22     | 0      | 21    | 21      | 1       | A    | 0           | 381019.384   | -0.046                     | 198.7260  |
| 22   | 22     | 1      | 21    | 21      | 0       | A    | 0           | 381019.384   | -0.046                     | 198.7260  |
| 69   | 5      | 64     | 68    | 5       | 63      | E    | 0           | 381034.935   | 0.041                      | 526.8653  |
| 69   | 6      | 64     | 68    | 6       | 63      | E    | 0           | 381034.935   | 0.041                      | 526.8653  |
| 69   | 5      | 64     | 68    | 5       | 63      | A    | 0           | 381038.250   | 0.050                      | 526.8618  |
| 69   | 5      | 64     | 68    | 6       | 63      | A    | 0           | 381038.250   | 0.050                      | 526.8618  |
| 69   | 6      | 64     | 68    | 5       | 63      | A    | 0           | 381038.250   | 0.050                      | 526.8618  |
| 69   | 6      | 64     | 68    | 6       | 63      | A    | 0           | 381038.250   | 0.050                      | 526.8618  |
| 63   | 11     | 52     | 62    | 12      | 51      | E    | 1           | 381090.162   | 0.098                      | 630.2051  |
| 70   | 4      | 66     | 69    | 4       | 65      | E    | 1           | 381111.878   | 0.072                      | 657.6700  |
| 70   | 4      | 66     | 69    | 5       | 65      | E    | 1           | 381111.878   | 0.072                      | 657.6700  |
| 70   | 5      | 66     | 69    | 4       | 65      | E    | 1           | 381111.878   | 0.072                      | 657.6700  |
| 70   | 5      | 66     | 69    | 5       | 65      | E    | 1           | 381111.878   | 0.072                      | 657.6700  |
| 63   | 11     | 52     | 62    | 12      | 51      | A    | 0           | 381179.695   | -0.337                     | 501.9482  |
| 63   | 11     | 52     | 62    | 11      | 51      | A    | 0           | 381194.604   | -0.020                     | 501.9477  |
| 70   | 4      | 66     | 69    | 4       | 65      | E    | 0           | 381201.869   | -0.010                     | 529.4113  |
| 70   | 5      | 66     | 69    | 5       | 65      | E    | 0           | 381201.869   | -0.010                     | 529.4113  |
| 70   | 4      | 66     | 69    | 4       | 65      | A    | 0           | 381204.818   | 0.030                      | 529.4068  |
| 70   | 4      | 66     | 69    | 5       | 65      | A    | 0           | 381204.818   | 0.030                      | 529.4068  |
| 70   | 5      | 66     | 69    | 4       | 65      | A    | 0           | 381204.818   | 0.030                      | 529.4068  |
| 70   | 5      | 66     | 69    | 5       | 65      | A    | 0           | 381204.818   | 0.030                      | 529.4068  |
| 49   | 34     | 15     | 49    | 33      | 16      | A    | 0           | 381258.248   | -0.114                     | 526.3072  |
| 49   | 34     | 16     | 49    | 33      | 17      | A    | 0           | 381258.248   | -0.114                     | 526.3072  |
| 49   | 34     | 15     | 49    | 33      | 16      | E    | 0           | 381302.693   | -0.013                     | 526.3019  |
| 61   | 25     | 37     | 60    | 25      | 36      | A    | 0           | 381393.169   | -0.186                     | 564.2613  |
| 61   | 25     | 36     | 60    | 25      | 35      | A    | 0           | 381393.169   | -0.186                     | 564.2613  |
| 48   | 34     | 14     | 48    | 33      | 15      | E    | 0           | 381444.898   | 0.119                      | 516.2171  |
| 41   | 13     | 29     | 40    | 12      | 28      | E    | 0           | 381519.301   | -0.179                     | 266.0206  |
| 47   | 34     | 13     | 47    | 33      | 14      | A    | 0           | 381534.265   | 0.128                      | 506.3462  |
| 47   | 34     | 14     | 47    | 33      | 15      | A    | 0           | 381534.265   | 0.128                      | 506.3462  |
| 62   | 12     | 50     | 61    | 13      | 49      | E    | 0           | 381641.771   | 0.048                      | 495.9480  |
| 62   | 13     | 50     | 61    | 13      | 49      | E    | 0           | 381782.778   | -0.024                     | 495.9480  |
| 62   | 13     | 50     | 61    | 13      | 49      | A    | 0           | 381789.363   | 0.122                      | 495.9467  |
| 24   | 21     | 3      | 23    | 20      | 3       | E    | 0           | 381839.669   | -0.050                     | 200.1467  |
| 24   | 21     | 4      | 23    | 20      | 4       | E    | 0           | 381873.499   | 0.044                      | 200.1365  |
| 24   | 21     | 4      | 23    | 20      | 3       | A    | 0           | 381885.407   | -0.087                     | 200.1495  |
| 24   | 21     | 3      | 23    | 20      | 4       | A    | 0           | 381885.407   | -0.087                     | 200.1495  |
| 44   | 34     | 10     | 44    | 33      | 11      | A    | 0           | 381889.539   | -0.037                     | 477.9677  |
| 44   | 34     | 11     | 44    | 33      | 12      | A    | 0           | 381889.539   | -0.037                     | 477.9677  |
| 44   | 34     | 11     | 44    | 33      | 12      | E    | 0           | 381898.182   | 0.064                      | 477.9543  |
| 44   | 34     | 10     | 44    | 33      | 11      | E    | 0           | 381934.285   | 0.035                      | 477.9625  |
| 43   | 34     | 9      | 43    | 33      | 10      | A    | 0           | 381993.953   | 0.114                      | 468.9244  |
| 43   | 34     | 10     | 43    | 33      | 11      | A    | 0           | 381993.953   | 0.114                      | 468.9244  |
| 62   | 13     | 50     | 61    | 12      | 49      | E    | 0           | 382020.901   | -0.001                     | 495.9401  |
| 62   | 13     | 50     | 61    | 12      | 49      | A    | 0           | 382028.535   | -0.021                     | 495.9387  |
| 60   | 14     | 47     | 59    | 13      | 46      | E    | 0           | 382079.526   | -0.018                     | 476.5421  |
| 61   | 24     | 37     | 60    | 24      | 36      | A    | 0           | 382129.780   | -0.067                     | 555.2554  |
| 61   | 24     | 38     | 60    | 24      | 37      | A    | 0           | 382129.780   | -0.065                     | 555.2554  |
| 60   | 15     | 46     | 59    | 15      | 45      | E    | 0           | 382582.183   | 0.046                      | 481.9951  |
| 60   | 15     | 46     | 59    | 15      | 45      | A    | 0           | 382585.436   | -0.029                     | 481.9934  |
| 61   | 14     | 48     | 60    | 14      | 47      | E    | 0           | 382624.204   | -0.031                     | 489.2869  |
| 61   | 14     | 48     | 60    | 14      | 47      | A    | 0           | 382630.927   | 0.068                      | 489.2853  |
| 26   | 20     | 6      | 25    | 19      | 6       | E    | 0           | 382690.465   | -0.014                     | 202.7940  |
| 26   | 20     | 7      | 25    | 19      | 7       | E    | 0           | 382720.084   | 0.038                      | 202.7828  |
| 26   | 20     | 6      | 25    | 19      | 7       | A    | 0           | 382737.341   | -0.047                     | 202.7952  |
| 26   | 20     | 7      | 25    | 19      | 6       | A    | 0           | 382737.341   | -0.047                     | 202.7952  |
| 61   | 23     | 39     | 60    | 23      | 38      | A    | 0           | 382986.001   | -0.017                     | 546.6799  |
| 61   | 23     | 39     | 60    | 23      | 38      | E    | 0           | 382990.502   | 0.150                      | 546.6679  |
| 40   | 13     | 27     | 39    | 12      | 28      | A    | 0           | 383029.157   | -0.057                     | 257.3050  |
| 40   | 13     | 27     | 39    | 12      | 28      | E    | 0           | 383034.124   | -0.043                     | 257.3085  |
| 28   | 19     | 9      | 27    | 18      | 9       | E    | 0           | 383507.004   | -0.083                     | 206.6731  |
| 60   | 18     | 43     | 59    | 18      | 42      | A    | 0           | 383530.337   | 0.122                      | 498.0330  |
| 28   | 19     | 10     | 27    | 18      | 10      | E    | 0           | 383532.012   | 0.001                      | 206.6611  |
| 60   | 18     | 43     | 59    | 18      | 42      | E    | 0           | 383545.347   | 0.002                      | 498.0304  |
| 28   | 19     | 10     | 27    | 18      | 9       | A    | 0           | 383554.439   | -0.038                     | 206.6727  |
| 28   | 19     | 9      | 27    | 18      | 10      | A    | 0           | 383554.439   | -0.038                     | 206.6727  |
| 42   | 13     | 30     | 41    | 12      | 29      | E    | 0           | 383596.770   | -0.064                     | 274.8726  |
| 44   | 13     | 32     | 43    | 12      | 31      | A    | 0           | 383640.577   | -0.003                     | 293.3922  |
| 42   | 13     | 30     | 41    | 12      | 29      | A    | 0           | 383676.218   | 0.044                      | 274.8677  |
| 61   | 13     | 48     | 60    | 13      | 47      | E    | 0           | 383687.074   | -0.112                     | 489.1911  |
| 61   | 13     | 48     | 60    | 13      | 47      | A    | 0           | 383698.067   | 0.129                      | 489.1891  |
| 61   | 22     | 39     | 60    | 22      | 38      | A    | 0           | 383995.855   | -0.130                     | 538.5460  |
| 61   | 22     | 39     | 60    | 22      | 38      | E    | 0           | 384000.935   | 0.049                      | 538.5425  |
| 38   | 14     | 25     | 37    | 13      | 24      | A    | 0           | 384029.783   | -0.036                     | 245.3413  |
| 38   | 14     | 24     | 37    | 13      | 24      | E    | 0           | 384059.193   | -0.070                     | 245.3478  |
| 38   | 14     | 25     | 37    | 13      | 25      | E    | 0           | 384074.541   | -0.053                     | 245.3343  |
| 38   | 14     | 24     | 37    | 13      | 25      | A    | 0           | 384190.318   | -0.031                     | 245.3368  |
| 30   | 18     | 12     | 29    | 17      | 12      | E    | 0           | 384253.360   | -0.058                     | 211.7977  |
| 30   | 18     | 13     | 29    | 17      | 13      | E    | 0           | 384273.265   | 0.026                      | 211.7850  |
| 30   | 18     | 12     | 29    | 17      | 13      | A    | 0           | 384300.591   | -0.030                     | 211.7957  |
| 30   | 18     | 13     | 29    | 17      | 12      | A    | 0           | 384300.591   | -0.030                     | 211.7957  |
| 43   | 13     | 31     | 42    | 12      | 30      | E    | 0           | 384335.142   | -0.033                     | 283.9968  |
| 43   | 13     | 31     | 42    | 12      | 30      | A    | 0           | 384417.038   | -0.046                     | 283.9914  |
| 60   | 18     | 42     | 59    | 18      | 41      | A    | 0           | 384497.130   | -0.058                     | 498.0811  |
| 60   | 18     | 42     | 59    | 18      | 41      | E    | 0           | 384501.377   | 0.016                      | 498.0798  |
| 32   | 17     | 15     | 31    | 16      | 15      | E    | 0           | 384865.851   | -0.079                     | 218.1877  |
| 54   | 14     | 41     | 53    | 13      | 40      | E    | 0           | 384872.895   | -0.005                     | 403.4932  |
| 32   | 17     | 16     | 31    | 16      | 16      | E    | 0           | 384880.178   | 0.009                      | 218.1746  |
| 32   | 17     | 16     | 31    | 16      | 15      | A    | 0           | 384912.146   | -0.113                     | 218.1840  |
| 32   | 17     | 15     | 31    | 16      | 16      | A    | 0           | 384912.146   | -0.114                     | 218.1840  |
| 36   | 15     | 21     | 35    | 14      | 21      | E    | 0           | 385123.914   | -0.340                     | 234.8996  |
| 36   | 15     | 22     | 35    | 14      | 22      | E    | 0           | 385125.459   | 0.130                      | 234.8863  |
| 36   | 15     | 22     | 35    | 14      | 21      | A    | 0           | 385165.272   | 0.029                      | 234.8927  |
| 36   | 15     | 21     | 35    | 14      | 22      | A    | 0           | 385168.130   | -0.023                     | 234.8927  |
| 61   | 21     | 41     | 60    | 21      | 40      | A    | 0           | 385207.617   | -0.040                     | 530.8691  |
| 61   | 21     | 40     | 60    | 21      | 39      | A    | 0           | 385211.312   | -0.052                     | 530.8693  |
| 34   | 16     | 18     | 33    | 15      | 18      | E    | 0           | 385229.697   | -0.051                     | 225.8728  |
| 34   | 16     | 19     | 33    | 15      | 19      | E    | 0           | 385237.877   | 0.049                      | 225.8594  |
| 60   | 17     | 44     | 59    | 17      | 43      | A    | 0           | 385248.599   | -0.071                     | 492.3485  |
| 60   | 17     | 44     | 59    | 17      | 43      | E    | 0           | 385256.592   | 0.077                      | 492.3481  |
| 34   | 16     | 19     | 33    | 15      | 18      | A    | 0           | 385274.467   | -0.018                     | 225.8675  |
| 59   | 14     | 45     | 58    | 14      | 44      | A    | 0           | 385422.001   | 0.008                      | 468.3989  |
| 61   | 14     | 48     | 60    | 13      | 47      | E    | 0           | 385496.408   | -0.132                     | 489.1911  |
| 61   | 14     | 48     | 60    | 13      | 47      | A    | 0           | 385515.221   | -0.030                     | 489.1891  |
| 66   | 9      | 57     | 65    | 9       | 56      | A    | 1           | 385592.847   | 0.019                      | 653.2149  |
| 66   | 9      | 57     | 65    | 10      | 56      | A    | 1           | 385592.847   | 0.031                      | 653.2149  |
| 66   | 10     | 57     | 65    | 9       | 56      | A    | 1           | 385592.847   | 0.013                      | 653.2149  |
| 66   | 10     | 57     | 65    | 10      | 56      | A    | 1           | 385592.847   | 0.025                      | 653.2149  |
| 67   | 8      | 59     | 66    | 8       | 58      | A    | 1           | 385598.242   | -0.030                     | 657.5873  |
| 67   | 8      | 59     | 66    | 9       | 58      | A    | 1           | 385598.242   | -0.029                     | 657.5873  |
| 67   | 9      | 59     | 66    | 8       | 58      | A    | 1           | 385598.242   | -0.030                     | 657.5873  |
| 67   | 9      | 59     | 66    | 9       | 58      | A    | 1           | 385598.242   | -0.029                     | 657.5873  |
| 68   | 7      | 61     | 67    | 7       | 60      | A    | 1           | 385674.254   | -0.100                     | 661.4876  |
| 68   | 7      | 61     | 67    | 8       | 60      | A    | 1           | 385674.254   | -0.100                     | 661.4876  |



| $J'$ | $K'_a$ | $K'_c$ | $J''$ | $K''_a$ | $K''_c$ | Sym. | $v_{tCH_3}$ | $\nu_{Obs.}$ | $\nu_{Obs.} - \nu_{Calc.}$ | $E_{low}$ |
|------|--------|--------|-------|---------|---------|------|-------------|--------------|----------------------------|-----------|
| 68   | 8      | 61     | 67    | 7       | 60      | A    | 1           | 385674.254   | -0.100                     | 661.4876  |
| 68   | 8      | 61     | 67    | 8       | 60      | A    | 1           | 385674.254   | -0.100                     | 661.4876  |
| 65   | 10     | 55     | 64    | 10      | 54      | A    | 1           | 385694.303   | 0.041                      | 648.3454  |
| 65   | 10     | 55     | 64    | 11      | 54      | A    | 1           | 385694.303   | 0.372                      | 648.3455  |
| 65   | 11     | 55     | 64    | 10      | 54      | A    | 1           | 385694.303   | -0.138                     | 648.3454  |
| 65   | 11     | 55     | 64    | 11      | 54      | A    | 1           | 385694.303   | 0.193                      | 648.3455  |
| 67   | 8      | 59     | 66    | 8       | 58      | E    | 1           | 385734.016   | -0.008                     | 657.5428  |
| 67   | 8      | 59     | 66    | 9       | 58      | E    | 1           | 385734.016   | -0.008                     | 657.5428  |
| 67   | 9      | 59     | 66    | 8       | 58      | E    | 1           | 385734.016   | -0.008                     | 657.5428  |
| 67   | 9      | 59     | 66    | 9       | 58      | E    | 1           | 385734.016   | -0.008                     | 657.5428  |
| 66   | 9      | 57     | 65    | 9       | 56      | E    | 1           | 385739.009   | 0.013                      | 653.1810  |
| 66   | 9      | 57     | 65    | 10      | 56      | E    | 1           | 385739.009   | 0.028                      | 653.1810  |
| 66   | 10     | 57     | 65    | 9       | 56      | E    | 1           | 385739.009   | 0.005                      | 653.1810  |
| 66   | 10     | 57     | 65    | 10      | 56      | E    | 1           | 385739.009   | 0.020                      | 653.1810  |
| 69   | 6      | 63     | 68    | 6       | 62      | A    | 1           | 385798.388   | -0.150                     | 664.9343  |
| 69   | 6      | 63     | 68    | 7       | 62      | A    | 1           | 385798.388   | -0.150                     | 664.9343  |
| 69   | 7      | 63     | 68    | 6       | 62      | A    | 1           | 385798.388   | -0.150                     | 664.9343  |
| 69   | 7      | 63     | 68    | 7       | 62      | A    | 1           | 385798.388   | -0.150                     | 664.9343  |
| 68   | 7      | 61     | 67    | 7       | 60      | E    | 1           | 385800.636   | -0.027                     | 661.4275  |
| 68   | 7      | 61     | 67    | 8       | 60      | E    | 1           | 385800.636   | -0.027                     | 661.4275  |
| 68   | 8      | 61     | 67    | 7       | 60      | E    | 1           | 385800.636   | -0.027                     | 661.4275  |
| 68   | 8      | 61     | 67    | 8       | 60      | E    | 1           | 385800.636   | -0.027                     | 661.4275  |
| 67   | 8      | 59     | 66    | 8       | 58      | E    | 0           | 385828.276   | 0.013                      | 529.2803  |
| 67   | 9      | 59     | 66    | 9       | 58      | E    | 0           | 385828.276   | 0.013                      | 529.2803  |
| 67   | 8      | 59     | 66    | 8       | 58      | A    | 0           | 385832.640   | 0.160                      | 529.2789  |
| 67   | 8      | 59     | 66    | 9       | 58      | A    | 0           | 385832.640   | 0.160                      | 529.2789  |
| 67   | 9      | 59     | 66    | 8       | 58      | A    | 0           | 385832.640   | 0.159                      | 529.2789  |
| 67   | 9      | 59     | 66    | 9       | 58      | A    | 0           | 385832.640   | 0.160                      | 529.2789  |
| 66   | 9      | 57     | 65    | 9       | 56      | A    | 0           | 385837.332   | -0.009                     | 524.9191  |
| 66   | 9      | 57     | 65    | 10      | 56      | A    | 0           | 385837.332   | 0.004                      | 524.9191  |
| 66   | 10     | 57     | 65    | 9       | 56      | A    | 0           | 385837.332   | -0.016                     | 524.9191  |
| 66   | 10     | 57     | 65    | 10      | 56      | A    | 0           | 385837.332   | -0.003                     | 524.9191  |
| 65   | 10     | 55     | 64    | 10      | 54      | E    | 1           | 385853.273   | -0.050                     | 648.3174  |
| 65   | 10     | 55     | 64    | 11      | 54      | E    | 1           | 385853.273   | 0.361                      | 648.3174  |
| 65   | 11     | 55     | 64    | 10      | 54      | E    | 1           | 385853.273   | -0.274                     | 648.3174  |
| 65   | 11     | 55     | 64    | 11      | 54      | E    | 1           | 385853.273   | 0.137                      | 648.3174  |
| 68   | 7      | 61     | 67    | 7       | 60      | E    | 0           | 385894.572   | 0.021                      | 533.1646  |
| 68   | 8      | 61     | 67    | 8       | 60      | E    | 0           | 385894.572   | 0.021                      | 533.1646  |
| 68   | 7      | 61     | 67    | 7       | 60      | A    | 0           | 385898.488   | 0.020                      | 533.1627  |
| 68   | 7      | 61     | 67    | 8       | 60      | A    | 0           | 385898.488   | 0.020                      | 533.1627  |
| 68   | 8      | 61     | 67    | 7       | 60      | A    | 0           | 385898.488   | 0.020                      | 533.1627  |
| 68   | 8      | 61     | 67    | 8       | 60      | A    | 0           | 385898.488   | 0.020                      | 533.1627  |
| 69   | 6      | 63     | 68    | 6       | 62      | E    | 1           | 385915.305   | -0.015                     | 664.8535  |
| 69   | 6      | 63     | 68    | 7       | 62      | E    | 1           | 385915.305   | -0.015                     | 664.8535  |
| 69   | 7      | 63     | 68    | 6       | 62      | E    | 1           | 385915.305   | -0.015                     | 664.8535  |
| 69   | 7      | 63     | 68    | 7       | 62      | E    | 1           | 385915.305   | -0.015                     | 664.8535  |
| 65   | 10     | 55     | 64    | 10      | 54      | E    | 0           | 385945.151   | -0.085                     | 520.0597  |
| 65   | 11     | 55     | 64    | 11      | 54      | E    | 0           | 385945.151   | 0.085                      | 520.0597  |
| 65   | 10     | 55     | 64    | 10      | 54      | A    | 0           | 385950.104   | -0.086                     | 520.0588  |
| 65   | 10     | 55     | 64    | 11      | 54      | A    | 0           | 385950.104   | 0.289                      | 520.0588  |
| 65   | 11     | 55     | 64    | 10      | 54      | A    | 0           | 385950.104   | -0.289                     | 520.0588  |
| 65   | 11     | 55     | 64    | 11      | 54      | A    | 0           | 385950.104   | 0.086                      | 520.0588  |
| 70   | 5      | 65     | 69    | 5       | 64      | A    | 1           | 385955.967   | -0.168                     | 667.9421  |
| 70   | 5      | 65     | 69    | 6       | 64      | A    | 1           | 385955.967   | -0.168                     | 667.9421  |
| 70   | 6      | 65     | 69    | 5       | 64      | A    | 1           | 385955.967   | -0.168                     | 667.9421  |
| 70   | 6      | 65     | 69    | 6       | 64      | A    | 1           | 385955.967   | -0.168                     | 667.9421  |
| 64   | 11     | 53     | 63    | 12      | 52      | A    | 1           | 385958.699   | -0.029                     | 642.9445  |
| 64   | 12     | 53     | 63    | 12      | 52      | A    | 1           | 385963.131   | 0.232                      | 642.9445  |
| 64   | 11     | 53     | 63    | 11      | 52      | A    | 1           | 385966.141   | -0.023                     | 642.9442  |
| 64   | 12     | 53     | 63    | 11      | 52      | A    | 1           | 385970.616   | 0.282                      | 642.9442  |
| 69   | 6      | 63     | 68    | 7       | 62      | E    | 0           | 386008.447   | -0.039                     | 536.5916  |
| 69   | 7      | 63     | 68    | 6       | 62      | E    | 0           | 386008.447   | -0.039                     | 536.5916  |
| 69   | 6      | 63     | 68    | 6       | 62      | A    | 0           | 386012.171   | 0.072                      | 536.5890  |
| 69   | 6      | 63     | 68    | 7       | 62      | A    | 0           | 386012.171   | 0.072                      | 536.5890  |
| 69   | 7      | 63     | 68    | 6       | 62      | A    | 0           | 386012.171   | 0.072                      | 536.5890  |
| 69   | 7      | 63     | 68    | 7       | 62      | A    | 0           | 386012.171   | 0.072                      | 536.5890  |
| 70   | 5      | 65     | 69    | 5       | 64      | E    | 1           | 386062.450   | 0.019                      | 667.8348  |
| 70   | 5      | 65     | 69    | 6       | 64      | E    | 1           | 386062.450   | 0.019                      | 667.8348  |
| 70   | 6      | 65     | 69    | 5       | 64      | E    | 1           | 386062.450   | 0.019                      | 667.8348  |
| 70   | 6      | 65     | 69    | 6       | 64      | E    | 1           | 386062.450   | 0.019                      | 667.8348  |
| 64   | 11     | 53     | 63    | 11      | 52      | E    | 1           | 386143.455   | 0.054                      | 642.9169  |
| 70   | 5      | 65     | 69    | 5       | 64      | E    | 0           | 386154.841   | 0.008                      | 539.5752  |
| 70   | 6      | 65     | 69    | 6       | 64      | E    | 0           | 386154.841   | 0.008                      | 539.5752  |
| 70   | 5      | 65     | 69    | 5       | 64      | A    | 0           | 386158.151   | 0.039                      | 539.5718  |
| 70   | 5      | 65     | 69    | 6       | 64      | A    | 0           | 386158.151   | 0.039                      | 539.5718  |
| 70   | 6      | 65     | 69    | 5       | 64      | A    | 0           | 386158.151   | 0.039                      | 539.5718  |
| 70   | 6      | 65     | 69    | 6       | 64      | A    | 0           | 386158.151   | 0.039                      | 539.5718  |
| 62   | 14     | 48     | 61    | 15      | 47      | E    | 0           | 386176.316   | 0.077                      | 507.6979  |
| 64   | 12     | 53     | 63    | 11      | 52      | A    | 0           | 386240.790   | -0.069                     | 514.6630  |
| 63   | 12     | 51     | 62    | 13      | 50      | A    | 1           | 386420.582   | 0.218                      | 636.9616  |
| 62   | 13     | 49     | 61    | 14      | 48      | E    | 0           | 386498.121   | 0.022                      | 502.0499  |
| 62   | 13     | 49     | 61    | 14      | 48      | A    | 0           | 386499.767   | 0.106                      | 502.0485  |
| 61   | 20     | 42     | 60    | 20      | 41      | A    | 0           | 386690.860   | -0.095                     | 523.6707  |
| 63   | 12     | 51     | 62    | 13      | 50      | E    | 0           | 386694.450   | 0.258                      | 508.6829  |
| 61   | 20     | 42     | 60    | 20      | 41      | E    | 0           | 386712.466   | 0.042                      | 523.6615  |
| 61   | 20     | 41     | 60    | 20      | 40      | A    | 0           | 386724.393   | -0.059                     | 523.6720  |
| 63   | 13     | 51     | 62    | 13      | 50      | E    | 0           | 386776.850   | -0.213                     | 508.6829  |
| 63   | 13     | 51     | 62    | 13      | 50      | A    | 0           | 386783.375   | 0.062                      | 508.6819  |
| 63   | 12     | 51     | 62    | 12      | 50      | E    | 0           | 386835.196   | -0.075                     | 508.6782  |
| 63   | 12     | 51     | 62    | 12      | 50      | A    | 0           | 386841.827   | 0.013                      | 508.6771  |
| 63   | 13     | 51     | 62    | 12      | 50      | E    | 0           | 386918.025   | -0.117                     | 508.6782  |
| 63   | 13     | 51     | 62    | 12      | 50      | A    | 0           | 386925.181   | 0.045                      | 508.6771  |
| 23   | 22     | 1      | 22    | 21      | 1       | E    | 0           | 387119.909   | -0.004                     | 203.2354  |
| 23   | 22     | 2      | 22    | 21      | 2       | E    | 0           | 387157.336   | 0.037                      | 203.2263  |
| 23   | 22     | 1      | 22    | 21      | 2       | A    | 0           | 387163.862   | -0.064                     | 203.2398  |
| 23   | 22     | 2      | 22    | 21      | 1       | A    | 0           | 387163.862   | -0.064                     | 203.2398  |
| 62   | 26     | 36     | 61    | 26      | 35      | A    | 0           | 387244.197   | -0.259                     | 586.3895  |
| 62   | 26     | 37     | 61    | 26      | 36      | A    | 0           | 387244.197   | -0.259                     | 586.3895  |
| 62   | 26     | 37     | 61    | 26      | 36      | E    | 0           | 387246.764   | -0.096                     | 586.3777  |
| 62   | 26     | 36     | 61    | 26      | 35      | E    | 0           | 387248.373   | 0.045                      | 586.3805  |
| 62   | 14     | 49     | 61    | 14      | 48      | A    | 1           | 387329.223   | 0.181                      | 630.3307  |
| 70   | 35     | 36     | 70    | 34      | 37      | A    | 0           | 387677.163   | -0.081                     | 799.1829  |
| 70   | 35     | 35     | 70    | 34      | 36      | A    | 0           | 387677.163   | -0.081                     | 799.1829  |
| 62   | 25     | 38     | 61    | 25      | 37      | A    | 0           | 387922.236   | -0.082                     | 576.9832  |
| 62   | 25     | 37     | 61    | 25      | 36      | A    | 0           | 387922.236   | -0.082                     | 576.9832  |
| 62   | 25     | 38     | 61    | 25      | 37      | E    | 0           | 387925.239   | -0.104                     | 576.9712  |
| 62   | 25     | 37     | 61    | 25      | 36      | E    | 0           | 387926.684   | 0.145                      | 576.9755  |
| 25   | 21     | 4      | 24    | 20      | 4       | E    | 0           | 387981.279   | -0.039                     | 205.0766  |
| 25   | 21     | 5      | 24    | 20      | 5       | E    | 0           | 388015.059   | 0.037                      | 205.0664  |
| 25   | 21     | 5      | 24    | 20      | 4       | A    | 0           | 388027.031   | -0.060                     | 205.0794  |
| 25   | 21     | 4      | 24    | 20      | 5       | A    | 0           | 388027.031   | -0.060                     | 205.0794  |
| 69   | 35     | 35     | 69    | 34      | 36      | A    | 0           | 388056.337   | 0.100                      | 784.6808  |
| 69   | 35     | 34     | 69    | 34      | 35      | A    | 0           | 388056.337   | 0.100                      | 784.6808  |
| 69   | 35     | 34     | 69    | 34      | 35      | E    | 0           | 388099.104   | -0.182                     | 784.6767  |
| 62   | 13     | 49     | 61    | 13      | 48      | E    | 0           | 388307.312   | -0.141                     | 501.9896  |
| 62   | 13     | 49     | 61    | 13      | 48      | A    | 0           | 388316.973   | 0.000                      | 501.9879  |



| $J'$ | $K'_a$ | $K'_c$ | $J''$ | $K''_a$ | $K''_c$ | Sym. | $v_{tCH_3}$ | $\nu_{Obs.}$ | $\nu_{Obs.} - \nu_{Calc.}$ | $E_{low}$ |
|------|--------|--------|-------|---------|---------|------|-------------|--------------|----------------------------|-----------|
| 68   | 35     | 34     | 68    | 34      | 35      | A    | 0           | 388418.526   | -0.106                     | 770.3915  |
| 68   | 35     | 33     | 68    | 34      | 34      | A    | 0           | 388418.526   | -0.106                     | 770.3915  |
| 68   | 35     | 34     | 68    | 34      | 35      | E    | 0           | 388427.765   | -0.169                     | 770.3792  |
| 68   | 35     | 33     | 68    | 34      | 34      | E    | 0           | 388461.822   | -0.105                     | 770.3875  |
| 61   | 19     | 43     | 60    | 19      | 42      | A    | 0           | 388508.685   | -0.228                     | 516.9796  |
| 61   | 19     | 43     | 60    | 19      | 42      | E    | 0           | 388539.046   | -0.041                     | 516.9743  |
| 62   | 24     | 38     | 61    | 24      | 37      | A    | 0           | 388702.775   | -0.068                     | 568.0019  |
| 62   | 24     | 39     | 61    | 24      | 38      | A    | 0           | 388702.775   | -0.064                     | 568.0019  |
| 61   | 19     | 42     | 60    | 19      | 41      | E    | 0           | 388749.109   | -0.003                     | 516.9896  |
| 61   | 19     | 42     | 60    | 19      | 41      | A    | 0           | 388762.607   | -0.056                     | 516.9910  |
| 67   | 35     | 32     | 67    | 34      | 33      | E    | 0           | 388808.734   | 0.197                      | 756.3109  |
| 27   | 20     | 7      | 26    | 19      | 7       | E    | 0           | 388824.214   | -0.083                     | 208.1426  |
| 27   | 20     | 8      | 26    | 19      | 8       | E    | 0           | 388853.856   | 0.043                      | 208.1314  |
| 27   | 20     | 7      | 26    | 19      | 8       | A    | 0           | 388871.140   | -0.059                     | 208.1439  |
| 27   | 20     | 8      | 26    | 19      | 7       | A    | 0           | 388871.140   | -0.059                     | 208.1439  |
| 59   | 16     | 43     | 58    | 16      | 42      | A    | 0           | 389083.093   | -0.025                     | 475.2926  |
| 66   | 35     | 32     | 66    | 34      | 33      | A    | 0           | 389095.847   | -0.081                     | 742.4507  |
| 66   | 35     | 31     | 66    | 34      | 32      | A    | 0           | 389095.847   | -0.081                     | 742.4507  |
| 59   | 16     | 43     | 58    | 16      | 42      | E    | 0           | 389101.552   | -0.107                     | 475.2956  |
| 66   | 35     | 32     | 66    | 34      | 33      | E    | 0           | 389105.706   | -0.157                     | 742.4382  |
| 66   | 35     | 31     | 66    | 34      | 32      | E    | 0           | 389139.749   | 0.073                      | 742.4467  |
| 60   | 14     | 46     | 59    | 14      | 45      | E    | 0           | 389155.087   | -0.049                     | 481.2591  |
| 60   | 14     | 46     | 59    | 14      | 45      | A    | 0           | 389173.962   | 0.033                      | 481.2552  |
| 41   | 13     | 28     | 40    | 12      | 29      | E    | 0           | 389226.855   | 0.029                      | 265.8171  |
| 41   | 13     | 28     | 40    | 12      | 29      | A    | 0           | 389238.339   | 0.046                      | 265.8133  |
| 65   | 35     | 31     | 65    | 34      | 32      | A    | 0           | 389411.946   | 0.016                      | 728.7985  |
| 65   | 35     | 30     | 65    | 34      | 31      | A    | 0           | 389411.946   | 0.016                      | 728.7985  |
| 65   | 35     | 31     | 65    | 34      | 32      | E    | 0           | 389422.002   | -0.159                     | 728.7860  |
| 62   | 14     | 49     | 61    | 13      | 48      | E    | 0           | 389431.881   | -0.031                     | 501.9896  |
| 39   | 14     | 26     | 38    | 13      | 25      | A    | 0           | 389436.626   | -0.080                     | 253.3575  |
| 62   | 14     | 49     | 61    | 13      | 48      | A    | 0           | 389446.525   | -0.058                     | 501.9879  |
| 39   | 14     | 25     | 38    | 13      | 25      | E    | 0           | 389512.899   | -0.103                     | 253.3629  |
| 39   | 14     | 26     | 38    | 13      | 26      | E    | 0           | 389583.094   | -0.001                     | 253.3476  |
| 62   | 23     | 40     | 61    | 23      | 39      | A    | 0           | 389612.466   | -0.003                     | 559.4549  |
| 62   | 23     | 39     | 61    | 23      | 38      | E    | 0           | 389617.287   | -0.164                     | 559.4500  |
| 29   | 19     | 10     | 28    | 18      | 10      | E    | 0           | 389625.129   | -0.041                     | 212.4440  |
| 29   | 19     | 11     | 28    | 18      | 11      | E    | 0           | 389650.031   | 0.017                      | 212.4319  |
| 29   | 19     | 11     | 28    | 18      | 10      | A    | 0           | 389672.488   | -0.058                     | 212.4436  |
| 29   | 19     | 10     | 28    | 18      | 11      | A    | 0           | 389672.488   | -0.058                     | 212.4436  |
| 64   | 35     | 30     | 64    | 34      | 31      | A    | 0           | 389713.654   | 0.116                      | 715.3583  |
| 64   | 35     | 29     | 64    | 34      | 30      | A    | 0           | 389713.654   | 0.116                      | 715.3583  |
| 39   | 14     | 25     | 38    | 13      | 26      | A    | 0           | 389746.522   | -0.033                     | 253.3488  |
| 60   | 35     | 29     | 64    | 34      | 30      | E    | 0           | 389757.578   | -0.112                     | 715.3543  |
| 60   | 17     | 43     | 59    | 17      | 42      | A    | 0           | 389834.958   | -0.052                     | 492.6345  |
| 60   | 17     | 43     | 59    | 17      | 42      | E    | 0           | 389852.265   | 0.022                      | 492.6351  |
| 63   | 35     | 29     | 63    | 34      | 30      | A    | 0           | 390001.175   | -0.084                     | 702.1296  |
| 63   | 35     | 28     | 63    | 34      | 29      | A    | 0           | 390001.175   | -0.084                     | 702.1296  |
| 62   | 35     | 28     | 62    | 34      | 29      | A    | 0           | 390275.789   | 0.204                      | 689.1123  |
| 62   | 35     | 27     | 62    | 34      | 28      | A    | 0           | 390275.789   | 0.204                      | 689.1123  |
| 62   | 35     | 28     | 62    | 34      | 29      | E    | 0           | 390286.598   | -0.028                     | 689.0996  |
| 62   | 35     | 27     | 62    | 34      | 28      | E    | 0           | 390320.117   | 0.020                      | 689.1084  |
| 31   | 18     | 13     | 30    | 17      | 13      | E    | 0           | 390342.784   | -0.060                     | 217.9956  |
| 31   | 18     | 14     | 30    | 17      | 14      | E    | 0           | 390362.556   | 0.014                      | 217.9829  |
| 31   | 18     | 13     | 30    | 17      | 14      | A    | 0           | 390389.967   | -0.056                     | 217.9935  |
| 31   | 18     | 14     | 30    | 17      | 13      | A    | 0           | 390389.967   | -0.056                     | 217.9935  |
| 61   | 35     | 27     | 61    | 34      | 28      | A    | 0           | 390536.994   | 0.002                      | 676.3062  |
| 61   | 35     | 26     | 61    | 34      | 27      | A    | 0           | 390536.994   | 0.002                      | 676.3062  |
| 61   | 18     | 44     | 60    | 18      | 43      | A    | 0           | 390540.141   | 0.027                      | 510.8262  |
| 61   | 18     | 44     | 60    | 18      | 43      | E    | 0           | 390552.311   | -0.042                     | 510.8241  |
| 61   | 35     | 26     | 61    | 34      | 27      | E    | 0           | 390581.761   | 0.094                      | 676.3023  |
| 67   | 9      | 58     | 66    | 9       | 57      | A    | 1           | 390690.404   | 0.061                      | 666.0769  |
| 67   | 9      | 58     | 66    | 10      | 57      | A    | 1           | 390690.404   | 0.067                      | 666.0769  |
| 67   | 10     | 58     | 66    | 9       | 57      | A    | 1           | 390690.404   | 0.058                      | 666.0769  |
| 67   | 10     | 58     | 66    | 10      | 57      | A    | 1           | 390690.404   | 0.064                      | 666.0769  |
| 62   | 22     | 40     | 61    | 22      | 39      | E    | 0           | 390694.327   | -0.073                     | 551.3514  |
| 68   | 8      | 60     | 67    | 8       | 59      | A    | 1           | 390705.510   | -0.065                     | 670.4495  |
| 68   | 8      | 60     | 67    | 9       | 59      | A    | 1           | 390705.510   | -0.065                     | 670.4495  |
| 68   | 9      | 60     | 67    | 8       | 59      | A    | 1           | 390705.510   | -0.065                     | 670.4495  |
| 68   | 9      | 60     | 67    | 9       | 59      | A    | 1           | 390705.510   | -0.065                     | 670.4495  |
| 66   | 10     | 56     | 65    | 10      | 55      | A    | 1           | 390775.119   | 0.136                      | 661.2108  |
| 66   | 10     | 56     | 65    | 11      | 55      | A    | 1           | 390775.119   | 0.315                      | 661.2108  |
| 66   | 11     | 56     | 65    | 10      | 55      | A    | 1           | 390775.119   | 0.039                      | 661.2108  |
| 66   | 11     | 56     | 65    | 11      | 55      | A    | 1           | 390775.119   | 0.218                      | 661.2108  |
| 60   | 35     | 26     | 60    | 34      | 27      | A    | 0           | 390785.756   | -0.186                     | 663.7110  |
| 60   | 35     | 25     | 60    | 34      | 26      | A    | 0           | 390785.756   | -0.186                     | 663.7110  |
| 69   | 7      | 62     | 68    | 7       | 61      | A    | 1           | 390787.403   | -0.078                     | 674.3523  |
| 69   | 7      | 62     | 68    | 8       | 61      | A    | 1           | 390787.403   | -0.078                     | 674.3523  |
| 69   | 8      | 62     | 68    | 7       | 61      | A    | 1           | 390787.403   | -0.078                     | 674.3523  |
| 69   | 8      | 62     | 68    | 8       | 61      | A    | 1           | 390787.403   | -0.078                     | 674.3523  |
| 60   | 35     | 25     | 60    | 34      | 26      | E    | 0           | 390830.772   | 0.001                      | 663.7071  |
| 67   | 9      | 58     | 66    | 9       | 57      | E    | 1           | 390833.738   | 0.004                      | 666.0479  |
| 67   | 9      | 58     | 66    | 10      | 57      | E    | 1           | 390833.738   | 0.012                      | 666.0479  |
| 67   | 10     | 58     | 66    | 9       | 57      | E    | 1           | 390833.738   | -0.000                     | 666.0479  |
| 67   | 10     | 58     | 66    | 10      | 57      | E    | 1           | 390833.738   | 0.008                      | 666.0479  |
| 68   | 8      | 60     | 67    | 8       | 59      | E    | 1           | 390839.222   | -0.003                     | 670.4095  |
| 68   | 8      | 60     | 67    | 9       | 59      | E    | 1           | 390839.222   | -0.003                     | 670.4095  |
| 68   | 9      | 60     | 67    | 8       | 59      | E    | 1           | 390839.222   | -0.003                     | 670.4095  |
| 68   | 9      | 60     | 67    | 9       | 59      | E    | 1           | 390839.222   | -0.003                     | 670.4095  |
| 33   | 17     | 16     | 32    | 16      | 16      | E    | 0           | 390905.250   | -0.069                     | 224.8192  |
| 69   | 7      | 62     | 68    | 7       | 61      | E    | 1           | 390912.297   | 0.090                      | 674.2964  |
| 69   | 7      | 62     | 68    | 8       | 61      | E    | 1           | 390912.297   | 0.090                      | 674.2964  |
| 69   | 8      | 62     | 68    | 7       | 61      | E    | 1           | 390912.297   | 0.090                      | 674.2964  |
| 69   | 8      | 62     | 68    | 8       | 61      | E    | 1           | 390912.297   | 0.090                      | 674.2964  |
| 70   | 6      | 64     | 69    | 6       | 63      | A    | 1           | 390914.969   | -0.171                     | 677.8032  |
| 70   | 6      | 64     | 69    | 7       | 63      | A    | 1           | 390914.969   | -0.171                     | 677.8032  |
| 70   | 7      | 64     | 69    | 6       | 63      | A    | 1           | 390914.969   | -0.171                     | 677.8032  |
| 70   | 7      | 64     | 69    | 7       | 63      | A    | 1           | 390914.969   | -0.171                     | 677.8032  |
| 67   | 9      | 58     | 66    | 9       | 57      | E    | 0           | 390930.404   | -0.031                     | 537.7902  |
| 67   | 10     | 58     | 66    | 10      | 57      | E    | 0           | 390930.404   | -0.027                     | 537.7902  |
| 67   | 9      | 58     | 66    | 9       | 57      | A    | 0           | 390934.724   | -0.172                     | 537.7893  |
| 67   | 9      | 58     | 66    | 10      | 57      | A    | 0           | 390934.724   | -0.165                     | 537.7893  |
| 67   | 10     | 58     | 66    | 9       | 57      | A    | 0           | 390934.724   | -0.176                     | 537.7893  |
| 67   | 10     | 58     | 66    | 10      | 57      | A    | 0           | 390934.724   | -0.169                     | 537.7893  |
| 68   | 8      | 60     | 67    | 8       | 59      | E    | 0           | 390936.205   | 0.137                      | 542.1502  |
| 68   | 9      | 60     | 67    | 9       | 59      | E    | 0           | 390936.205   | 0.137                      | 542.1502  |
| 68   | 8      | 60     | 67    | 8       | 59      | A    | 0           | 390940.200   | -0.020                     | 542.1489  |
| 68   | 8      | 60     | 67    | 9       | 59      | A    | 0           | 390940.200   | -0.020                     | 542.1489  |
| 68   | 9      | 60     | 67    | 8       | 59      | A    | 0           | 390940.200   | -0.020                     | 542.1489  |
| 68   | 9      | 60     | 67    | 9       | 59      | A    | 0           | 390940.200   | -0.020                     | 542.1489  |
| 33   | 17     | 17     | 32    | 16      | 16      | A    | 0           | 390951.569   | -0.042                     | 224.8155  |
| 33   | 17     | 16     | 32    | 16      | 17      | A    | 0           | 390951.569   | -0.042                     | 224.8155  |
| 37   | 15     | 23     | 36    | 14      | 22      | A    | 0           | 390958.889   | -0.166                     | 242.4250  |
| 37   | 15     | 22     | 36    | 14      | 23      | A    | 0           | 390965.465   | 0.013                      | 242.4248  |
| 69   | 7      | 62     | 68    | 7       | 61      | E    | 0           | 391008.475   | 0.014                      | 546.0367  |
| 69   | 8      | 62     | 68    | 8       | 61      | E    | 0           | 391008.475   | 0.014                      | 546.0367  |
| 69   | 7      | 62     | 68    | 7       | 61      | A    | 0           | 391012.332   | 0.004                      | 546.0349  |



| $J'$ | $K'_a$ | $K'_c$ | $J''$ | $K''_a$ | $K''_c$ | Sym. | $v_{tCH_3}$ | $\nu_{Obs.}$ | $\nu_{Obs.} - \nu_{Calc.}$ | $E_{low}$ |
|------|--------|--------|-------|---------|---------|------|-------------|--------------|----------------------------|-----------|
| 69   | 7      | 62     | 68    | 8       | 61      | A    | 0           | 391012.332   | 0.004                      | 546.0349  |
| 69   | 8      | 62     | 68    | 7       | 61      | A    | 0           | 391012.332   | 0.004                      | 546.0349  |
| 69   | 8      | 62     | 68    | 8       | 61      | A    | 0           | 391012.332   | 0.004                      | 546.0349  |
| 65   | 12     | 54     | 64    | 11      | 53      | A    | 1           | 391018.705   | 0.091                      | 655.8186  |
| 66   | 10     | 56     | 65    | 10      | 55      | E    | 0           | 391025.469   | -0.082                     | 532.9335  |
| 66   | 11     | 56     | 65    | 11      | 55      | E    | 0           | 391025.469   | 0.011                      | 532.9335  |
| 59   | 35     | 25     | 59    | 34      | 26      | E    | 0           | 391034.571   | -0.054                     | 651.3137  |
| 59   | 35     | 24     | 59    | 34      | 25      | E    | 0           | 391067.920   | 0.064                      | 651.3226  |
| 70   | 6      | 64     | 69    | 6       | 63      | E    | 0           | 391126.130   | 0.041                      | 549.4674  |
| 70   | 7      | 64     | 69    | 7       | 63      | E    | 0           | 391126.130   | 0.041                      | 549.4674  |
| 70   | 6      | 64     | 69    | 6       | 63      | A    | 0           | 391129.697   | 0.030                      | 549.4650  |
| 70   | 6      | 64     | 69    | 7       | 63      | A    | 0           | 391129.697   | 0.030                      | 549.4650  |
| 70   | 7      | 64     | 69    | 6       | 63      | A    | 0           | 391129.697   | 0.030                      | 549.4650  |
| 70   | 7      | 64     | 69    | 7       | 63      | A    | 0           | 391129.697   | 0.030                      | 549.4650  |
| 35   | 16     | 19     | 34    | 15      | 19      | E    | 0           | 391181.980   | -0.148                     | 232.9474  |
| 35   | 16     | 20     | 34    | 15      | 20      | E    | 0           | 391189.826   | -0.068                     | 232.9341  |
| 35   | 16     | 19     | 34    | 15      | 20      | A    | 0           | 391226.836   | -0.024                     | 232.9421  |
| 58   | 35     | 24     | 58    | 34      | 25      | A    | 0           | 391248.117   | -0.133                     | 639.1525  |
| 58   | 35     | 23     | 58    | 34      | 24      | A    | 0           | 391248.117   | -0.133                     | 639.1525  |
| 65   | 11     | 54     | 64    | 12      | 53      | A    | 0           | 391279.956   | -0.257                     | 527.5466  |
| 57   | 35     | 23     | 57    | 34      | 24      | A    | 0           | 391462.444   | -0.020                     | 627.1887  |
| 57   | 35     | 22     | 57    | 34      | 23      | A    | 0           | 391462.444   | -0.020                     | 627.1887  |
| 57   | 35     | 23     | 57    | 34      | 24      | E    | 0           | 391474.551   | -0.068                     | 627.1758  |
| 64   | 13     | 52     | 63    | 13      | 51      | A    | 1           | 391500.449   | 0.342                      | 649.8537  |
| 57   | 35     | 22     | 57    | 34      | 23      | E    | 0           | 391507.580   | -0.120                     | 627.1849  |
| 64   | 12     | 52     | 63    | 13      | 51      | E    | 1           | 391642.178   | 0.167                      | 649.8281  |
| 56   | 35     | 22     | 56    | 34      | 23      | E    | 0           | 391678.126   | -0.157                     | 615.4221  |
| 64   | 13     | 52     | 63    | 13      | 51      | E    | 1           | 391694.384   | -0.096                     | 649.8281  |
| 56   | 35     | 21     | 56    | 34      | 22      | E    | 0           | 391711.231   | -0.061                     | 615.4312  |
| 64   | 12     | 52     | 63    | 13      | 51      | E    | 0           | 391730.579   | -0.023                     | 521.5844  |
| 64   | 12     | 52     | 63    | 13      | 51      | A    | 0           | 391736.310   | -0.074                     | 521.5836  |
| 55   | 35     | 21     | 55    | 34      | 22      | A    | 0           | 391859.017   | -0.054                     | 603.8913  |
| 55   | 35     | 20     | 55    | 34      | 21      | A    | 0           | 391859.017   | -0.054                     | 603.8913  |
| 64   | 13     | 52     | 63    | 12      | 51      | A    | 0           | 391868.142   | -0.124                     | 521.5808  |
| 63   | 13     | 50     | 62    | 14      | 49      | E    | 0           | 391909.922   | -0.036                     | 514.9796  |
| 63   | 13     | 50     | 62    | 14      | 49      | A    | 0           | 391913.302   | -0.059                     | 514.9785  |
| 61   | 17     | 45     | 60    | 17      | 44      | A    | 0           | 392009.596   | 0.101                      | 505.1990  |
| 54   | 35     | 20     | 54    | 34      | 21      | E    | 0           | 392054.775   | -0.169                     | 592.5441  |
| 54   | 35     | 19     | 54    | 34      | 20      | E    | 0           | 392088.166   | 0.353                      | 592.5533  |
| 53   | 35     | 19     | 53    | 34      | 20      | A    | 0           | 392215.936   | 0.088                      | 581.4324  |
| 53   | 35     | 18     | 53    | 34      | 19      | A    | 0           | 392215.936   | 0.088                      | 581.4324  |
| 53   | 35     | 19     | 53    | 34      | 20      | E    | 0           | 392228.608   | -0.096                     | 581.4194  |
| 53   | 35     | 18     | 53    | 34      | 19      | E    | 0           | 392261.736   | 0.229                      | 581.4286  |
| 52   | 35     | 18     | 52    | 34      | 19      | E    | 0           | 392393.282   | 0.037                      | 570.5040  |
| 52   | 35     | 17     | 52    | 34      | 18      | E    | 0           | 392426.000   | 0.017                      | 570.5132  |
| 51   | 35     | 17     | 51    | 34      | 18      | A    | 0           | 392535.623   | -0.149                     | 559.8107  |
| 51   | 35     | 16     | 51    | 34      | 17      | A    | 0           | 392535.623   | -0.149                     | 559.8107  |
| 51   | 35     | 17     | 51    | 34      | 18      | E    | 0           | 392548.961   | 0.038                      | 559.7976  |
| 63   | 28     | 35     | 62    | 28      | 34      | A    | 0           | 392568.265   | -0.069                     | 619.3290  |
| 63   | 28     | 36     | 62    | 28      | 35      | A    | 0           | 392568.265   | -0.069                     | 619.3290  |
| 63   | 28     | 35     | 62    | 28      | 34      | E    | 0           | 392569.821   | -0.003                     | 619.3183  |
| 51   | 35     | 16     | 51    | 34      | 17      | E    | 0           | 392581.588   | -0.010                     | 559.8069  |
| 63   | 14     | 50     | 62    | 14      | 49      | A    | 0           | 392607.015   | -0.084                     | 514.9785  |
| 50   | 35     | 16     | 50    | 34      | 17      | A    | 0           | 392682.822   | 0.024                      | 549.3133  |
| 50   | 35     | 15     | 50    | 34      | 16      | A    | 0           | 392682.822   | 0.024                      | 549.3133  |
| 50   | 35     | 16     | 50    | 34      | 17      | E    | 0           | 392696.111   | 0.025                      | 549.3002  |
| 50   | 35     | 15     | 50    | 34      | 16      | E    | 0           | 392728.668   | -0.031                     | 549.3095  |
| 64   | 15     | 49     | 63    | 16      | 48      | E    | 0           | 392804.829   | -0.001                     | 539.7028  |
| 49   | 35     | 15     | 49    | 34      | 16      | A    | 0           | 392821.672   | 0.016                      | 539.0246  |
| 49   | 35     | 14     | 49    | 34      | 15      | A    | 0           | 392821.672   | 0.016                      | 539.0246  |
| 49   | 35     | 15     | 49    | 34      | 16      | E    | 0           | 392835.035   | -0.036                     | 539.0115  |
| 49   | 35     | 14     | 49    | 34      | 15      | E    | 0           | 392867.599   | -0.025                     | 539.0208  |
| 48   | 35     | 14     | 48    | 34      | 15      | A    | 0           | 392952.541   | -0.132                     | 528.9445  |
| 48   | 35     | 13     | 48    | 34      | 14      | A    | 0           | 392952.541   | -0.132                     | 528.9445  |
| 48   | 35     | 14     | 48    | 34      | 15      | E    | 0           | 392966.156   | -0.051                     | 528.9313  |
| 48   | 35     | 13     | 48    | 34      | 14      | E    | 0           | 392998.773   | 0.070                      | 528.9407  |
| 63   | 13     | 50     | 62    | 13      | 49      | E    | 0           | 393034.362   | -0.055                     | 514.9421  |
| 63   | 13     | 50     | 62    | 13      | 49      | A    | 0           | 393042.705   | -0.265                     | 514.9408  |
| 47   | 35     | 13     | 47    | 34      | 14      | A    | 0           | 393076.123   | -0.046                     | 519.0728  |
| 47   | 35     | 12     | 47    | 34      | 13      | A    | 0           | 393076.123   | -0.046                     | 519.0728  |
| 46   | 35     | 12     | 46    | 34      | 13      | A    | 0           | 393192.430   | -0.024                     | 509.4092  |
| 46   | 35     | 11     | 46    | 34      | 12      | A    | 0           | 393192.430   | -0.024                     | 509.4092  |
| 46   | 35     | 12     | 46    | 34      | 13      | E    | 0           | 393206.093   | -0.112                     | 509.3961  |
| 62   | 15     | 48     | 61    | 15      | 47      | E    | 0           | 393221.934   | -0.005                     | 507.6979  |
| 62   | 15     | 48     | 61    | 15      | 47      | A    | 0           | 393227.105   | -0.029                     | 507.6965  |
| 46   | 35     | 11     | 46    | 34      | 12      | E    | 0           | 393238.638   | 0.046                      | 509.4055  |
| 24   | 22     | 2      | 23    | 21      | 2       | E    | 0           | 393263.577   | -0.109                     | 207.9560  |
| 24   | 22     | 3      | 23    | 21      | 3       | E    | 0           | 393301.159   | 0.109                      | 207.9469  |
| 24   | 22     | 2      | 23    | 21      | 3       | A    | 0           | 393307.673   | -0.027                     | 207.9603  |
| 24   | 22     | 3      | 23    | 21      | 2       | A    | 0           | 393307.673   | -0.027                     | 207.9603  |
| 44   | 35     | 10     | 44    | 34      | 11      | E    | 0           | 393418.429   | -0.114                     | 490.6930  |
| 44   | 35     | 9      | 44    | 34      | 10      | E    | 0           | 393450.944   | 0.117                      | 490.7025  |
| 62   | 20     | 43     | 61    | 20      | 42      | E    | 0           | 393605.746   | -0.157                     | 536.5608  |
| 62   | 20     | 42     | 61    | 20      | 41      | E    | 0           | 393623.938   | 0.066                      | 536.5708  |
| 62   | 20     | 42     | 61    | 20      | 41      | A    | 0           | 393637.442   | 0.185                      | 536.5717  |
| 41   | 35     | 7      | 41    | 34      | 8       | A    | 0           | 393675.973   | -0.096                     | 464.2093  |
| 41   | 35     | 6      | 41    | 34      | 7       | A    | 0           | 393675.973   | -0.096                     | 464.2093  |
| 41   | 35     | 7      | 41    | 34      | 8       | E    | 0           | 393690.225   | -0.023                     | 464.1961  |
| 41   | 35     | 6      | 41    | 34      | 7       | E    | 0           | 393722.359   | -0.031                     | 464.2056  |
| 63   | 14     | 50     | 62    | 13      | 49      | E    | 0           | 393724.863   | -0.007                     | 514.9421  |
| 63   | 14     | 50     | 62    | 13      | 49      | A    | 0           | 393736.678   | -0.030                     | 514.9408  |
| 63   | 26     | 37     | 62    | 26      | 36      | A    | 0           | 393750.496   | -0.067                     | 599.3066  |
| 63   | 26     | 38     | 62    | 26      | 37      | A    | 0           | 393750.496   | -0.067                     | 599.3066  |
| 63   | 26     | 38     | 62    | 26      | 37      | E    | 0           | 393753.178   | 0.060                      | 599.2949  |
| 63   | 14     | 49     | 62    | 15      | 48      | E    | 0           | 393768.072   | -0.095                     | 520.8144  |
| 26   | 21     | 5      | 25    | 20      | 5       | E    | 0           | 394120.918   | -0.047                     | 210.2140  |
| 26   | 21     | 6      | 25    | 20      | 6       | E    | 0           | 394154.664   | 0.030                      | 210.2038  |
| 26   | 21     | 6      | 25    | 20      | 5       | A    | 0           | 394166.687   | -0.049                     | 210.2168  |
| 26   | 21     | 5      | 25    | 20      | 6       | A    | 0           | 394166.687   | -0.049                     | 210.2168  |
| 40   | 14     | 27     | 39    | 13      | 26      | E    | 0           | 394423.757   | -0.032                     | 261.6075  |
| 63   | 25     | 39     | 62    | 25      | 38      | A    | 0           | 394467.445   | 0.019                      | 589.9229  |
| 63   | 25     | 38     | 62    | 25      | 37      | A    | 0           | 394467.445   | 0.018                      | 589.9229  |
| 63   | 25     | 39     | 62    | 25      | 38      | E    | 0           | 394470.321   | -0.316                     | 589.9110  |
| 63   | 25     | 38     | 62    | 25      | 37      | E    | 0           | 394471.843   | -0.022                     | 589.9153  |
| 40   | 14     | 27     | 39    | 13      | 26      | A    | 0           | 394679.704   | -0.028                     | 261.6031  |
| 40   | 14     | 26     | 39    | 13      | 26      | E    | 0           | 394817.030   | -0.094                     | 261.6075  |
| 28   | 20     | 8      | 27    | 19      | 8       | E    | 0           | 394954.295   | -0.014                     | 213.6997  |
| 28   | 20     | 9      | 27    | 19      | 9       | E    | 0           | 394983.788   | 0.020                      | 213.6885  |
| 28   | 20     | 8      | 27    | 19      | 9       | A    | 0           | 395001.153   | -0.049                     | 213.7009  |
| 28   | 20     | 9      | 27    | 19      | 8       | A    | 0           | 395001.153   | -0.049                     | 213.7009  |
| 40   | 14     | 27     | 39    | 13      | 27      | E    | 0           | 395036.708   | -0.004                     | 261.5870  |
| 40   | 14     | 26     | 39    | 13      | 27      | A    | 0           | 395262.277   | -0.035                     | 261.5869  |
| 63   | 24     | 40     | 62    | 24      | 39      | A    | 0           | 395294.527   | -0.020                     | 580.9676  |
| 62   | 19     | 44     | 61    | 19      | 43      | A    | 0           | 395506.880   | -0.099                     | 529.9389  |
| 62   | 19     | 44     | 61    | 19      | 43      | E    | 0           | 395529.965   | -0.029                     | 529.9346  |
| 30   | 19     | 11     | 29    | 18      | 11      | E    | 0           | 395736.612   | -0.052                     | 218.4245  |



| $J'$ | $K'_a$ | $K'_c$ | $J''$ | $K''_a$ | $K''_c$ | Sym. | $v_{tCH_3}$ | $\nu_{Obs.}$ | $\nu_{Obs.} - \nu_{Calc.}$ | $E_{low}$ |
|------|--------|--------|-------|---------|---------|------|-------------|--------------|----------------------------|-----------|
| 30   | 19     | 12     | 29    | 18      | 12      | E    | 0           | 395761.430   | 0.011                      | 218.4125  |
| 30   | 19     | 12     | 29    | 18      | 11      | A    | 0           | 395783.995   | -0.030                     | 218.4241  |
| 30   | 19     | 11     | 29    | 18      | 12      | A    | 0           | 395783.995   | -0.030                     | 218.4241  |
| 68   | 9      | 59     | 67    | 9       | 58      | A    | 1           | 395789.124   | -0.003                     | 679.1089  |
| 68   | 9      | 59     | 67    | 10      | 58      | A    | 1           | 395789.124   | 0.000                      | 679.1089  |
| 68   | 10     | 59     | 67    | 9       | 58      | A    | 1           | 395789.124   | -0.005                     | 679.1089  |
| 68   | 10     | 59     | 67    | 10      | 58      | A    | 1           | 395789.124   | -0.001                     | 679.1089  |
| 69   | 8      | 61     | 68    | 8       | 60      | A    | 1           | 395813.384   | -0.054                     | 683.4820  |
| 69   | 8      | 61     | 68    | 9       | 60      | A    | 1           | 395813.384   | -0.054                     | 683.4820  |
| 69   | 9      | 61     | 68    | 8       | 60      | A    | 1           | 395813.384   | -0.054                     | 683.4820  |
| 69   | 9      | 61     | 68    | 9       | 60      | A    | 1           | 395813.384   | -0.054                     | 683.4820  |
| 67   | 10     | 57     | 66    | 10      | 56      | A    | 1           | 395858.415   | 0.049                      | 674.2457  |
| 67   | 10     | 57     | 66    | 11      | 56      | A    | 1           | 395858.415   | 0.145                      | 674.2457  |
| 67   | 11     | 57     | 66    | 10      | 56      | A    | 1           | 395858.415   | -0.003                     | 674.2457  |
| 67   | 11     | 57     | 66    | 11      | 56      | A    | 1           | 395858.415   | 0.094                      | 674.2457  |
| 70   | 7      | 63     | 69    | 7       | 62      | A    | 1           | 395900.665   | -0.123                     | 687.3876  |
| 70   | 7      | 63     | 69    | 8       | 62      | A    | 1           | 395900.665   | -0.123                     | 687.3876  |
| 70   | 8      | 63     | 69    | 7       | 62      | A    | 1           | 395900.665   | -0.123                     | 687.3876  |
| 70   | 8      | 63     | 69    | 8       | 62      | A    | 1           | 395900.665   | -0.123                     | 687.3876  |
| 62   | 19     | 43     | 61    | 19      | 42      | E    | 0           | 395926.577   | 0.045                      | 529.9568  |
| 68   | 9      | 59     | 67    | 9       | 58      | E    | 1           | 395929.915   | 0.106                      | 679.0847  |
| 68   | 9      | 59     | 67    | 10      | 58      | E    | 1           | 395929.915   | 0.110                      | 679.0847  |
| 68   | 10     | 59     | 67    | 9       | 58      | E    | 1           | 395929.915   | 0.103                      | 679.0847  |
| 68   | 10     | 59     | 67    | 10      | 58      | E    | 1           | 395929.915   | 0.107                      | 679.0847  |
| 62   | 19     | 43     | 61    | 19      | 42      | A    | 0           | 395931.489   | -0.149                     | 529.9587  |
| 69   | 8      | 61     | 68    | 8       | 60      | E    | 1           | 395945.035   | 0.012                      | 683.4464  |
| 69   | 8      | 61     | 68    | 9       | 60      | E    | 1           | 395945.035   | 0.012                      | 683.4464  |
| 69   | 9      | 61     | 68    | 8       | 60      | E    | 1           | 395945.035   | 0.012                      | 683.4464  |
| 69   | 9      | 61     | 68    | 9       | 60      | E    | 1           | 395945.035   | 0.012                      | 683.4464  |
| 42   | 13     | 29     | 41    | 12      | 30      | E    | 0           | 396011.684   | 0.051                      | 274.5491  |
| 70   | 7      | 63     | 69    | 7       | 62      | E    | 1           | 396023.921   | -0.035                     | 687.3358  |
| 70   | 7      | 63     | 69    | 8       | 62      | E    | 1           | 396023.921   | -0.035                     | 687.3358  |
| 70   | 8      | 63     | 69    | 7       | 62      | E    | 1           | 396023.921   | -0.035                     | 687.3358  |
| 70   | 8      | 63     | 69    | 8       | 62      | E    | 1           | 396023.921   | -0.035                     | 687.3358  |
| 68   | 9      | 59     | 67    | 9       | 58      | E    | 0           | 396029.360   | -0.036                     | 550.8303  |
| 68   | 10     | 59     | 67    | 10      | 58      | E    | 0           | 396029.360   | -0.035                     | 550.8303  |
| 68   | 9      | 59     | 67    | 9       | 58      | A    | 0           | 396033.748   | -0.026                     | 550.8295  |
| 68   | 9      | 59     | 67    | 10      | 58      | A    | 0           | 396033.748   | -0.022                     | 550.8295  |
| 68   | 10     | 59     | 67    | 9       | 58      | A    | 0           | 396033.748   | -0.028                     | 550.8295  |
| 68   | 10     | 59     | 67    | 10      | 58      | A    | 0           | 396033.748   | -0.024                     | 550.8295  |
| 69   | 8      | 61     | 68    | 8       | 60      | E    | 0           | 396044.459   | -0.006                     | 555.1904  |
| 69   | 9      | 61     | 68    | 8       | 60      | E    | 0           | 396044.459   | -0.006                     | 555.1904  |
| 69   | 8      | 61     | 68    | 9       | 60      | A    | 0           | 396048.567   | 0.014                      | 555.1892  |
| 69   | 8      | 61     | 68    | 9       | 60      | A    | 0           | 396048.567   | 0.014                      | 555.1892  |
| 69   | 9      | 61     | 68    | 8       | 60      | A    | 0           | 396048.567   | 0.014                      | 555.1892  |
| 69   | 9      | 61     | 68    | 9       | 60      | A    | 0           | 396048.567   | 0.014                      | 555.1892  |
| 66   | 11     | 55     | 65    | 12      | 54      | A    | 1           | 396070.019   | 0.098                      | 668.8616  |
| 66   | 12     | 55     | 65    | 12      | 54      | A    | 1           | 396071.379   | 0.169                      | 668.8616  |
| 66   | 11     | 55     | 65    | 11      | 54      | A    | 1           | 396072.312   | 0.066                      | 668.8615  |
| 66   | 12     | 55     | 65    | 11      | 54      | A    | 1           | 396073.811   | 0.275                      | 668.8615  |
| 67   | 10     | 57     | 66    | 10      | 56      | E    | 0           | 396108.581   | -0.033                     | 545.9767  |
| 67   | 11     | 57     | 66    | 11      | 56      | E    | 0           | 396108.581   | 0.018                      | 545.9767  |
| 67   | 10     | 57     | 66    | 10      | 56      | A    | 0           | 396113.302   | -0.039                     | 545.9761  |
| 67   | 10     | 57     | 66    | 11      | 56      | A    | 0           | 396113.302   | 0.071                      | 545.9761  |
| 67   | 11     | 57     | 66    | 10      | 56      | A    | 0           | 396113.302   | -0.099                     | 545.9761  |
| 67   | 11     | 57     | 66    | 11      | 56      | A    | 0           | 396113.302   | 0.012                      | 545.9761  |
| 70   | 7      | 63     | 69    | 7       | 62      | E    | 0           | 396122.551   | -0.023                     | 559.0793  |
| 70   | 8      | 63     | 69    | 8       | 62      | E    | 0           | 396122.551   | -0.023                     | 559.0793  |
| 70   | 7      | 63     | 69    | 7       | 62      | A    | 0           | 396126.484   | 0.091                      | 559.0776  |
| 70   | 7      | 63     | 69    | 8       | 62      | A    | 0           | 396126.484   | 0.091                      | 559.0776  |
| 70   | 8      | 63     | 69    | 7       | 62      | A    | 0           | 396126.484   | 0.091                      | 559.0776  |
| 70   | 8      | 63     | 69    | 8       | 62      | A    | 0           | 396126.484   | 0.091                      | 559.0776  |
| 63   | 23     | 40     | 62    | 23      | 39      | A    | 0           | 396261.196   | -0.024                     | 572.4510  |
| 63   | 23     | 41     | 62    | 23      | 40      | E    | 0           | 396266.187   | 0.158                      | 572.4393  |
| 66   | 11     | 55     | 65    | 11      | 54      | E    | 0           | 396334.533   | 0.182                      | 540.5988  |
| 66   | 11     | 55     | 65    | 12      | 54      | A    | 0           | 396337.054   | 0.104                      | 540.5984  |
| 66   | 12     | 55     | 65    | 11      | 54      | A    | 0           | 396340.991   | -0.010                     | 540.5983  |
| 32   | 18     | 14     | 31    | 17      | 14      | E    | 0           | 396421.415   | -0.041                     | 224.4047  |
| 32   | 18     | 15     | 31    | 17      | 15      | E    | 0           | 396441.162   | 0.146                      | 224.3920  |
| 32   | 18     | 14     | 31    | 17      | 15      | A    | 0           | 396468.464   | -0.145                     | 224.4026  |
| 32   | 18     | 15     | 31    | 17      | 14      | A    | 0           | 396468.464   | -0.145                     | 224.4026  |
| 65   | 12     | 53     | 64    | 13      | 52      | A    | 1           | 396486.759   | 0.270                      | 662.9128  |
| 65   | 13     | 53     | 64    | 13      | 52      | A    | 1           | 396512.238   | 0.292                      | 662.9128  |
| 65   | 12     | 53     | 64    | 12      | 52      | A    | 1           | 396531.027   | 0.390                      | 662.9113  |
| 65   | 13     | 53     | 64    | 12      | 52      | A    | 1           | 396556.404   | 0.309                      | 662.9113  |
| 38   | 15     | 24     | 37    | 14      | 24      | E    | 0           | 396665.817   | -0.035                     | 250.1713  |
| 65   | 12     | 53     | 64    | 13      | 52      | E    | 1           | 396669.553   | 0.087                      | 662.8936  |
| 38   | 15     | 24     | 37    | 14      | 23      | A    | 0           | 396701.258   | -0.035                     | 250.1776  |
| 38   | 15     | 23     | 37    | 14      | 24      | A    | 0           | 396714.940   | -0.024                     | 250.1772  |
| 65   | 12     | 53     | 64    | 13      | 52      | E    | 0           | 396760.952   | 0.044                      | 534.6527  |
| 65   | 12     | 53     | 64    | 13      | 52      | A    | 0           | 396766.358   | -0.246                     | 534.6521  |
| 65   | 12     | 53     | 64    | 12      | 52      | E    | 0           | 396809.175   | -0.021                     | 534.6511  |
| 65   | 12     | 53     | 64    | 12      | 52      | A    | 0           | 396815.052   | -0.112                     | 534.6505  |
| 65   | 13     | 53     | 64    | 12      | 52      | A    | 0           | 396843.238   | -0.012                     | 534.6505  |
| 34   | 17     | 17     | 33    | 16      | 17      | E    | 0           | 396927.203   | -0.062                     | 231.6640  |
| 34   | 17     | 18     | 33    | 16      | 18      | E    | 0           | 396940.900   | -0.192                     | 231.6509  |
| 34   | 17     | 18     | 33    | 16      | 17      | A    | 0           | 396973.468   | -0.049                     | 231.6602  |
| 34   | 17     | 17     | 33    | 16      | 18      | A    | 0           | 396973.468   | -0.050                     | 231.6602  |
| 36   | 16     | 20     | 35    | 15      | 20      | E    | 0           | 397105.641   | -0.312                     | 240.2382  |
| 36   | 16     | 21     | 35    | 15      | 21      | E    | 0           | 397113.282   | -0.084                     | 240.2249  |
| 36   | 16     | 21     | 35    | 15      | 20      | A    | 0           | 397150.465   | -0.036                     | 240.2328  |
| 64   | 13     | 51     | 63    | 14      | 50      | A    | 0           | 397154.454   | -0.002                     | 528.0744  |
| 64   | 14     | 51     | 63    | 14      | 50      | A    | 1           | 397276.686   | 0.541                      | 656.3365  |
| 63   | 22     | 41     | 62    | 22      | 40      | E    | 0           | 397415.224   | 0.137                      | 564.3836  |
| 62   | 18     | 45     | 61    | 18      | 44      | A    | 0           | 397532.047   | -0.041                     | 523.8532  |
| 62   | 18     | 45     | 61    | 18      | 44      | E    | 0           | 397542.436   | -0.118                     | 523.8516  |
| 60   | 16     | 44     | 59    | 16      | 43      | A    | 0           | 397543.969   | 0.009                      | 488.2710  |
| 60   | 16     | 44     | 59    | 16      | 43      | E    | 0           | 397559.790   | 0.017                      | 488.2746  |
| 64   | 14     | 51     | 63    | 14      | 50      | E    | 0           | 397569.122   | -0.194                     | 528.0754  |
| 64   | 14     | 51     | 63    | 14      | 50      | A    | 0           | 397575.882   | -0.016                     | 528.0744  |
| 64   | 13     | 51     | 63    | 13      | 50      | E    | 0           | 397840.398   | 0.004                      | 528.0523  |
| 64   | 13     | 51     | 63    | 13      | 50      | A    | 0           | 397848.140   | -0.053                     | 528.0513  |
| 64   | 14     | 51     | 63    | 13      | 50      | E    | 0           | 398259.712   | -0.057                     | 528.0523  |
| 64   | 14     | 51     | 63    | 13      | 50      | A    | 0           | 398269.608   | -0.028                     | 528.0513  |
| 63   | 15     | 49     | 62    | 15      | 48      | E    | 0           | 398368.564   | -0.011                     | 520.8144  |
| 63   | 15     | 49     | 62    | 15      | 48      | A    | 0           | 398374.429   | 0.055                      | 520.8131  |
| 60   | 15     | 45     | 59    | 15      | 44      | E    | 0           | 398379.900   | -0.033                     | 484.8834  |
| 60   | 15     | 45     | 59    | 15      | 44      | A    | 0           | 398386.538   | 0.017                      | 484.8783  |
| 61   | 17     | 44     | 60    | 17      | 43      | E    | 0           | 398450.854   | -0.043                     | 505.6392  |
| 23   | 23     | 0      | 22    | 22      | 0       | E    | 0           | 398542.451   | -0.012                     | 211.4296  |
| 23   | 23     | 1      | 22    | 22      | 1       | E    | 0           | 398582.679   | -0.290                     | 211.4218  |
| 23   | 23     | 1      | 22    | 22      | 0       | A    | 0           | 398584.172   | 0.048                      | 211.4354  |
| 23   | 23     | 0      | 22    | 22      | 1       | A    | 0           | 398584.172   | 0.048                      | 211.4354  |
| 62   | 17     | 46     | 61    | 17      | 45      | E    | 0           | 398642.660   | -0.046                     | 518.2751  |
| 63   | 21     | 43     | 62    | 21      | 42      | A    | 0           | 398797.869   | -0.108                     | 556.7935  |
| 64   | 28     | 36     | 63    | 28      | 35      | A    | 0           | 399024.101   | -0.112                     | 632.4237  |



| $J'$ | $K'_a$ | $K'_c$ | $J''$ | $K''_a$ | $K''_c$ | Sym. | $v_{tCH_3}$ | $\nu_{Obs.}$ | $\nu_{Obs.} - \nu_{Calc.}$ | $E_{low}$ |
|------|--------|--------|-------|---------|---------|------|-------------|--------------|----------------------------|-----------|
| 64   | 28     | 37     | 63    | 28      | 36      | A    | 0           | 399024.101   | -0.112                     | 632.4237  |
| 64   | 28     | 37     | 63    | 28      | 36      | E    | 0           | 399027.760   | -0.004                     | 632.4129  |
| 25   | 22     | 3      | 24    | 21      | 3       | E    | 0           | 399406.339   | -0.065                     | 212.8835  |
| 25   | 22     | 4      | 24    | 21      | 4       | E    | 0           | 399443.769   | 0.026                      | 212.8744  |
| 25   | 22     | 3      | 24    | 21      | 4       | A    | 0           | 399450.357   | -0.062                     | 212.8879  |
| 25   | 22     | 4      | 24    | 21      | 3       | A    | 0           | 399450.357   | -0.062                     | 212.8879  |
| 64   | 27     | 38     | 63    | 27      | 37      | A    | 0           | 399608.710   | 0.002                      | 622.2239  |
| 64   | 27     | 37     | 63    | 27      | 36      | A    | 0           | 399608.710   | 0.002                      | 622.2239  |
| 64   | 27     | 38     | 63    | 27      | 37      | E    | 0           | 399610.747   | -0.073                     | 622.2126  |
| 64   | 27     | 37     | 63    | 27      | 36      | E    | 0           | 399612.489   | -0.130                     | 622.2140  |
| 70   | 36     | 34     | 70    | 35      | 35      | A    | 0           | 399632.383   | -0.048                     | 812.1144  |
| 70   | 36     | 35     | 70    | 35      | 36      | A    | 0           | 399632.383   | -0.048                     | 812.1144  |
| 70   | 36     | 35     | 70    | 35      | 36      | E    | 0           | 399646.250   | -0.335                     | 812.1025  |
| 70   | 36     | 34     | 70    | 35      | 35      | E    | 0           | 399676.662   | -0.129                     | 812.1118  |
| 41   | 14     | 28     | 40    | 13      | 27      | A    | 0           | 399695.971   | -0.044                     | 270.0814  |
| 62   | 18     | 44     | 61    | 18      | 43      | A    | 0           | 399895.776   | -0.060                     | 523.9846  |
| 62   | 18     | 44     | 61    | 18      | 43      | E    | 0           | 399908.507   | 0.008                      | 523.9838  |
| 41   | 14     | 27     | 40    | 13      | 27      | E    | 0           | 399915.992   | 0.053                      | 270.0851  |
| 69   | 36     | 33     | 69    | 35      | 34      | A    | 0           | 399979.980   | -0.051                     | 797.6249  |
| 69   | 36     | 34     | 69    | 35      | 35      | A    | 0           | 399979.980   | -0.051                     | 797.6249  |
| 69   | 36     | 33     | 69    | 35      | 34      | E    | 0           | 400024.692   | 0.083                      | 797.6223  |
| 27   | 21     | 6      | 26    | 20      | 6       | E    | 0           | 400258.165   | -0.035                     | 215.5592  |
| 64   | 26     | 38     | 63    | 26      | 37      | A    | 0           | 400271.306   | -0.034                     | 612.4407  |
| 64   | 26     | 39     | 63    | 26      | 38      | A    | 0           | 400271.306   | -0.034                     | 612.4407  |
| 64   | 26     | 39     | 63    | 26      | 38      | E    | 0           | 400274.068   | 0.015                      | 612.4290  |
| 64   | 26     | 38     | 63    | 26      | 37      | E    | 0           | 400275.597   | -0.025                     | 612.4320  |
| 27   | 21     | 7      | 26    | 20      | 7       | E    | 0           | 400291.853   | 0.026                      | 215.5490  |
| 27   | 21     | 7      | 26    | 20      | 6       | A    | 0           | 400303.914   | -0.053                     | 215.5620  |
| 27   | 21     | 6      | 26    | 20      | 7       | A    | 0           | 400303.914   | -0.053                     | 215.5620  |
| 68   | 36     | 33     | 68    | 35      | 34      | E    | 0           | 400327.121   | -0.267                     | 783.3358  |
| 68   | 36     | 32     | 68    | 35      | 33      | E    | 0           | 400357.339   | -0.024                     | 783.3452  |
| 41   | 14     | 28     | 40    | 13      | 28      | E    | 0           | 400453.749   | -0.123                     | 270.0532  |
| 64   | 14     | 50     | 63    | 15      | 49      | A    | 0           | 400477.380   | -0.110                     | 534.1014  |
| 64   | 14     | 50     | 63    | 15      | 49      | E    | 0           | 400483.679   | -0.037                     | 534.1025  |
| 63   | 20     | 44     | 62    | 20      | 43      | A    | 0           | 400503.622   | -0.024                     | 549.6976  |
| 63   | 20     | 44     | 62    | 20      | 43      | E    | 0           | 400536.443   | 0.022                      | 549.6901  |
| 63   | 20     | 43     | 62    | 20      | 42      | E    | 0           | 400590.859   | 0.214                      | 549.7007  |
| 63   | 20     | 43     | 62    | 20      | 42      | A    | 0           | 400607.642   | 0.006                      | 549.7021  |
| 67   | 36     | 31     | 67    | 35      | 32      | A    | 0           | 400630.558   | -0.031                     | 769.2827  |
| 67   | 36     | 32     | 67    | 35      | 33      | A    | 0           | 400630.558   | -0.031                     | 769.2827  |
| 67   | 36     | 32     | 67    | 35      | 33      | E    | 0           | 400645.416   | -0.286                     | 769.2706  |
| 67   | 36     | 31     | 67    | 35      | 32      | E    | 0           | 400675.598   | 0.034                      | 769.2802  |
| 41   | 14     | 27     | 40    | 13      | 28      | A    | 0           | 400763.224   | -0.075                     | 270.0520  |
| 63   | 14     | 49     | 62    | 14      | 48      | E    | 0           | 400813.658   | -0.209                     | 520.5794  |
| 63   | 14     | 49     | 62    | 14      | 48      | A    | 0           | 400827.931   | -0.056                     | 520.5772  |
| 41   | 14     | 27     | 40    | 13      | 28      | E    | 0           | 400873.853   | -0.161                     | 270.0532  |
| 69   | 9      | 60     | 68    | 9       | 59      | A    | 1           | 400889.095   | 0.054                      | 692.3110  |
| 69   | 9      | 60     | 68    | 10      | 59      | A    | 1           | 400889.095   | 0.056                      | 692.3110  |
| 69   | 10     | 60     | 68    | 9       | 59      | A    | 1           | 400889.095   | 0.053                      | 692.3110  |
| 69   | 10     | 60     | 68    | 10      | 59      | A    | 1           | 400889.095   | 0.055                      | 692.3110  |
| 69   | 17     | 52     | 68    | 18      | 51      | E    | 0           | 400898.762   | 0.095                      | 621.4161  |
| 70   | 8      | 62     | 69    | 8       | 61      | A    | 1           | 400921.746   | -0.046                     | 696.6849  |
| 70   | 8      | 62     | 69    | 9       | 61      | A    | 1           | 400921.746   | -0.046                     | 696.6849  |
| 70   | 9      | 62     | 69    | 8       | 61      | A    | 1           | 400921.746   | -0.046                     | 696.6849  |
| 70   | 9      | 62     | 69    | 9       | 61      | A    | 1           | 400921.746   | -0.046                     | 696.6849  |
| 66   | 36     | 30     | 66    | 35      | 31      | A    | 0           | 400934.523   | -0.030                     | 755.4295  |
| 66   | 36     | 31     | 66    | 35      | 32      | A    | 0           | 400934.523   | -0.030                     | 755.4295  |
| 68   | 10     | 58     | 67    | 10      | 57      | A    | 1           | 400944.204   | 0.090                      | 687.4501  |
| 68   | 10     | 58     | 67    | 11      | 57      | A    | 1           | 400944.204   | 0.142                      | 687.4501  |
| 68   | 11     | 58     | 67    | 10      | 57      | A    | 1           | 400944.204   | 0.062                      | 687.4501  |
| 68   | 11     | 58     | 67    | 11      | 57      | A    | 1           | 400944.204   | 0.114                      | 687.4501  |
| 66   | 36     | 31     | 66    | 35      | 32      | E    | 0           | 400949.776   | -0.182                     | 755.4174  |
| 66   | 36     | 30     | 66    | 35      | 31      | E    | 0           | 400979.731   | 0.020                      | 755.4270  |
| 69   | 9      | 60     | 68    | 9       | 59      | E    | 1           | 401027.152   | 0.074                      | 692.2915  |
| 69   | 9      | 60     | 68    | 10      | 59      | E    | 1           | 401027.152   | 0.076                      | 692.2915  |
| 69   | 10     | 60     | 68    | 9       | 59      | E    | 1           | 401027.152   | 0.073                      | 692.2915  |
| 69   | 10     | 60     | 68    | 10      | 59      | E    | 1           | 401027.152   | 0.075                      | 692.2915  |
| 70   | 8      | 62     | 69    | 8       | 61      | E    | 1           | 401051.330   | -0.020                     | 696.6538  |
| 70   | 8      | 62     | 69    | 9       | 61      | E    | 1           | 401051.330   | -0.019                     | 696.6538  |
| 70   | 9      | 62     | 69    | 8       | 61      | E    | 1           | 401051.330   | -0.020                     | 696.6538  |
| 70   | 9      | 62     | 69    | 9       | 61      | E    | 1           | 401051.330   | -0.019                     | 696.6538  |
| 29   | 20     | 9      | 28    | 19      | 9       | E    | 0           | 401079.830   | -0.047                     | 219.4656  |
| 68   | 10     | 58     | 67    | 10      | 57      | E    | 1           | 401092.397   | 0.033                      | 687.4376  |
| 68   | 10     | 58     | 67    | 11      | 57      | E    | 1           | 401092.397   | 0.098                      | 687.4376  |
| 68   | 11     | 58     | 67    | 10      | 57      | E    | 1           | 401092.397   | -0.002                     | 687.4376  |
| 68   | 11     | 58     | 67    | 11      | 57      | E    | 1           | 401092.397   | 0.063                      | 687.4376  |
| 29   | 20     | 10     | 28    | 19      | 10      | E    | 0           | 401109.311   | 0.041                      | 219.4543  |
| 29   | 20     | 9      | 28    | 19      | 10      | A    | 0           | 401126.706   | -0.056                     | 219.4667  |
| 29   | 20     | 10     | 28    | 19      | 9       | A    | 0           | 401126.706   | -0.056                     | 219.4667  |
| 69   | 9      | 60     | 68    | 9       | 59      | E    | 0           | 401129.525   | -0.011                     | 564.0404  |
| 69   | 10     | 60     | 68    | 10      | 59      | E    | 0           | 401129.525   | -0.010                     | 564.0404  |
| 69   | 9      | 60     | 68    | 9       | 59      | A    | 0           | 401133.879   | 0.046                      | 564.0397  |
| 69   | 9      | 60     | 68    | 10      | 59      | A    | 0           | 401133.879   | 0.048                      | 564.0397  |
| 69   | 10     | 60     | 68    | 9       | 59      | A    | 0           | 401133.879   | 0.045                      | 564.0397  |
| 69   | 10     | 60     | 68    | 10      | 59      | A    | 0           | 401133.879   | 0.047                      | 564.0397  |
| 70   | 8      | 62     | 69    | 8       | 61      | E    | 0           | 401153.395   | 0.010                      | 568.4010  |
| 70   | 9      | 62     | 69    | 9       | 61      | E    | 0           | 401153.395   | 0.010                      | 568.4010  |
| 70   | 8      | 62     | 69    | 8       | 61      | A    | 0           | 401157.429   | 0.019                      | 568.4000  |
| 70   | 8      | 62     | 69    | 9       | 61      | A    | 0           | 401157.429   | 0.019                      | 568.4000  |
| 70   | 9      | 62     | 69    | 8       | 61      | A    | 0           | 401157.429   | 0.019                      | 568.4000  |
| 70   | 9      | 62     | 69    | 9       | 61      | A    | 0           | 401157.429   | 0.019                      | 568.4000  |
| 68   | 10     | 58     | 67    | 10      | 57      | E    | 0           | 401194.090   | -0.031                     | 559.1894  |
| 68   | 11     | 58     | 67    | 11      | 57      | E    | 0           | 401194.090   | -0.004                     | 559.1894  |
| 68   | 10     | 58     | 67    | 10      | 57      | A    | 0           | 401198.713   | -0.028                     | 559.1890  |
| 68   | 10     | 58     | 67    | 11      | 57      | A    | 0           | 401198.713   | 0.031                      | 559.1890  |
| 68   | 11     | 58     | 67    | 10      | 57      | A    | 0           | 401198.713   | -0.060                     | 559.1890  |
| 68   | 11     | 58     | 67    | 11      | 57      | A    | 0           | 401198.713   | -0.001                     | 559.1890  |
| 65   | 36     | 29     | 65    | 35      | 30      | A    | 0           | 401224.884   | -0.068                     | 741.7879  |
| 65   | 36     | 30     | 65    | 35      | 31      | A    | 0           | 401224.884   | -0.068                     | 741.7879  |
| 67   | 12     | 56     | 66    | 11      | 55      | A    | 0           | 401399.972   | -0.272                     | 553.8187  |
| 64   | 36     | 28     | 64    | 35      | 29      | A    | 0           | 401502.217   | -0.036                     | 728.3577  |
| 64   | 36     | 29     | 64    | 35      | 30      | A    | 0           | 401502.217   | -0.036                     | 728.3577  |
| 66   | 13     | 54     | 65    | 13      | 53      | A    | 1           | 401532.110   | 0.348                      | 676.1390  |
| 66   | 12     | 54     | 65    | 12      | 53      | A    | 1           | 401543.183   | 0.538                      | 676.1381  |
| 64   | 36     | 28     | 64    | 35      | 29      | E    | 0           | 401547.683   | -0.061                     | 728.3552  |
| 66   | 12     | 54     | 65    | 12      | 53      | E    | 1           | 401726.410   | 0.085                      | 676.1251  |
| 63   | 36     | 27     | 63    | 35      | 28      | A    | 0           | 401766.831   | -0.075                     | 715.1386  |
| 63   | 36     | 28     | 63    | 35      | 29      | A    | 0           | 401766.831   | -0.075                     | 715.1386  |
| 63   | 36     | 28     | 63    | 35      | 29      | E    | 0           | 401782.894   | -0.216                     | 715.1264  |
| 66   | 12     | 54     | 65    | 13      | 53      | A    | 0           | 401796.329   | -0.058                     | 547.8877  |
| 31   | 19     | 12     | 30    | 18      | 12      | E    | 0           | 401840.602   | -0.081                     | 224.6151  |
| 31   | 19     | 13     | 30    | 18      | 13      | E    | 0           | 401865.289   | -0.049                     | 224.6030  |
| 31   | 19     | 13     | 30    | 18      | 12      | A    | 0           | 401887.984   | -0.044                     | 224.6146  |
| 31   | 19     | 12     | 30    | 18      | 13      | A    | 0           | 401887.984   | -0.044                     | 224.6146  |
| 62   | 36     | 26     | 62    | 35      | 27      | A    | 0           | 402019.181   | -0.172                     | 702.1305  |
| 62   | 36     | 27     | 62    | 35      | 28      | A    | 0           | 402019.181   | -0.172                     | 702.1305  |



| $J'$ | $K'_a$ | $K'_c$ | $J''$ | $K''_a$ | $K''_c$ | Sym. | $v_{tCH_3}$ | $\nu_{Obs.}$ | $\nu_{Obs.} - \nu_{Calc.}$ | $E_{low}$ |
|------|--------|--------|-------|---------|---------|------|-------------|--------------|----------------------------|-----------|
| 62   | 36     | 27     | 62    | 35      | 28      | E    | 0           | 402035.821   | 0.023                      | 702.1182  |
| 62   | 36     | 26     | 62    | 35      | 27      | E    | 0           | 402065.573   | 0.434                      | 702.1281  |
| 65   | 14     | 52     | 64    | 14      | 51      | A    | 1           | 402246.091   | 0.590                      | 669.5882  |
| 61   | 36     | 25     | 61    | 35      | 26      | A    | 0           | 402260.002   | -0.014                     | 689.3331  |
| 61   | 36     | 26     | 61    | 35      | 27      | A    | 0           | 402260.002   | -0.014                     | 689.3331  |
| 65   | 13     | 52     | 64    | 14      | 51      | E    | 0           | 402284.928   | -0.034                     | 541.3368  |
| 65   | 13     | 52     | 64    | 14      | 51      | A    | 0           | 402290.352   | 0.251                      | 541.3361  |
| 61   | 36     | 25     | 61    | 35      | 26      | E    | 0           | 402305.963   | 0.026                      | 689.3307  |
| 39   | 15     | 25     | 38    | 14      | 24      | A    | 0           | 402383.732   | -0.087                     | 258.1520  |
| 39   | 15     | 24     | 38    | 14      | 25      | A    | 0           | 402412.199   | -0.052                     | 258.1512  |
| 33   | 18     | 15     | 32    | 17      | 15      | E    | 0           | 402487.899   | -0.092                     | 231.0254  |
| 33   | 18     | 16     | 32    | 17      | 16      | E    | 0           | 402507.408   | 0.011                      | 231.0128  |
| 33   | 18     | 15     | 32    | 17      | 16      | A    | 0           | 402535.081   | -0.037                     | 231.0233  |
| 33   | 18     | 16     | 32    | 17      | 15      | A    | 0           | 402535.081   | -0.037                     | 231.0233  |
| 65   | 14     | 52     | 64    | 14      | 51      | A    | 0           | 402543.646   | 0.049                      | 541.3361  |
| 63   | 19     | 45     | 62    | 19      | 44      | E    | 0           | 402549.133   | -0.016                     | 543.1280  |
| 65   | 13     | 52     | 64    | 13      | 51      | E    | 0           | 402704.386   | 0.048                      | 541.3228  |
| 59   | 36     | 23     | 59    | 35      | 24      | A    | 0           | 402707.650   | 0.011                      | 664.3696  |
| 59   | 36     | 24     | 59    | 35      | 25      | A    | 0           | 402707.650   | 0.011                      | 664.3696  |
| 65   | 13     | 52     | 64    | 13      | 51      | A    | 0           | 402711.518   | -0.026                     | 541.3221  |
| 59   | 36     | 23     | 59    | 35      | 24      | E    | 0           | 402753.900   | 0.098                      | 664.3672  |
| 58   | 36     | 22     | 58    | 35      | 23      | A    | 0           | 402915.270   | -0.121                     | 652.2031  |
| 58   | 36     | 23     | 58    | 35      | 24      | A    | 0           | 402915.270   | -0.121                     | 652.2031  |
| 35   | 17     | 18     | 34    | 16      | 18      | E    | 0           | 402929.736   | -0.130                     | 238.7226  |
| 64   | 23     | 42     | 63    | 23      | 41      | A    | 0           | 402933.017   | -0.064                     | 585.6688  |
| 58   | 36     | 23     | 58    | 35      | 24      | E    | 0           | 402933.017   | 0.326                      | 652.1906  |
| 64   | 23     | 41     | 63    | 23      | 40      | E    | 0           | 402938.553   | -0.119                     | 585.6642  |
| 35   | 17     | 19     | 34    | 16      | 19      | E    | 0           | 402943.464   | 0.012                      | 238.7096  |
| 65   | 14     | 52     | 64    | 13      | 51      | E    | 0           | 402956.550   | 0.002                      | 541.3228  |
| 65   | 14     | 52     | 64    | 13      | 51      | A    | 0           | 402965.091   | 0.051                      | 541.3221  |
| 35   | 17     | 19     | 34    | 16      | 18      | A    | 0           | 402976.020   | -0.056                     | 238.7188  |
| 35   | 17     | 18     | 34    | 16      | 19      | A    | 0           | 402976.020   | -0.059                     | 238.7188  |
| 37   | 16     | 21     | 36    | 15      | 21      | E    | 0           | 402998.003   | -0.064                     | 247.7459  |
| 37   | 16     | 22     | 36    | 15      | 22      | E    | 0           | 403005.066   | -0.020                     | 247.7327  |
| 63   | 16     | 48     | 62    | 16      | 47      | E    | 0           | 403017.270   | 0.051                      | 526.2596  |
| 63   | 16     | 48     | 62    | 16      | 47      | A    | 0           | 403019.054   | -0.041                     | 526.2585  |
| 37   | 16     | 22     | 36    | 15      | 21      | A    | 0           | 403042.591   | 0.157                      | 247.7405  |
| 57   | 36     | 21     | 57    | 35      | 22      | A    | 0           | 403112.920   | -0.028                     | 640.2465  |
| 57   | 36     | 22     | 57    | 35      | 23      | A    | 0           | 403112.920   | -0.028                     | 640.2465  |
| 65   | 15     | 50     | 64    | 16      | 49      | A    | 0           | 403118.122   | -0.127                     | 553.3292  |
| 57   | 36     | 22     | 57    | 35      | 23      | E    | 0           | 403130.303   | -0.132                     | 640.2340  |
| 65   | 15     | 50     | 64    | 16      | 49      | E    | 0           | 403152.360   | -0.081                     | 553.3302  |
| 57   | 36     | 21     | 57    | 35      | 22      | E    | 0           | 403159.288   | -0.034                     | 640.2442  |
| 63   | 19     | 44     | 62    | 19      | 43      | A    | 0           | 403228.184   | 0.026                      | 543.1656  |
| 63   | 19     | 44     | 62    | 19      | 43      | E    | 0           | 403230.054   | -0.083                     | 543.1635  |
| 56   | 36     | 20     | 56    | 35      | 21      | A    | 0           | 403300.606   | -0.073                     | 628.4996  |
| 56   | 36     | 21     | 56    | 35      | 22      | A    | 0           | 403300.606   | -0.073                     | 628.4996  |
| 56   | 36     | 21     | 56    | 35      | 22      | E    | 0           | 403318.470   | -0.127                     | 628.4871  |
| 56   | 36     | 20     | 56    | 35      | 21      | E    | 0           | 403346.915   | -0.233                     | 628.4873  |
| 61   | 15     | 46     | 60    | 15      | 45      | A    | 0           | 403385.086   | 0.014                      | 498.1670  |
| 64   | 15     | 50     | 63    | 15      | 49      | E    | 0           | 403436.110   | 0.060                      | 534.1025  |
| 64   | 15     | 50     | 63    | 15      | 49      | A    | 0           | 403442.228   | -0.017                     | 534.1014  |
| 61   | 15     | 47     | 60    | 14      | 46      | E    | 0           | 403460.064   | -0.045                     | 494.2399  |
| 55   | 36     | 19     | 55    | 35      | 20      | A    | 0           | 403478.804   | -0.139                     | 616.9623  |
| 55   | 36     | 20     | 55    | 35      | 21      | A    | 0           | 403478.804   | -0.139                     | 616.9623  |
| 55   | 36     | 19     | 55    | 35      | 20      | E    | 0           | 403525.453   | -0.046                     | 616.9599  |
| 54   | 36     | 18     | 54    | 35      | 19      | A    | 0           | 403648.021   | -0.071                     | 605.6342  |
| 54   | 36     | 19     | 54    | 35      | 20      | A    | 0           | 403648.021   | -0.071                     | 605.6342  |
| 54   | 36     | 19     | 54    | 35      | 20      | E    | 0           | 403666.265   | 0.182                      | 605.6216  |
| 43   | 13     | 30     | 42    | 12      | 31      | E    | 0           | 403695.152   | -0.196                     | 283.5014  |
| 43   | 13     | 30     | 42    | 12      | 31      | A    | 0           | 403712.040   | -0.074                     | 283.4974  |
| 53   | 36     | 17     | 53    | 35      | 18      | A    | 0           | 403808.425   | -0.041                     | 594.5153  |
| 53   | 36     | 18     | 53    | 35      | 19      | A    | 0           | 403808.425   | -0.041                     | 594.5153  |
| 53   | 36     | 18     | 53    | 35      | 19      | E    | 0           | 403826.484   | -0.122                     | 594.5027  |
| 53   | 36     | 17     | 53    | 35      | 18      | E    | 0           | 403855.205   | 0.028                      | 594.5130  |
| 52   | 36     | 16     | 52    | 35      | 17      | A    | 0           | 403960.438   | 0.041                      | 583.6054  |
| 52   | 36     | 17     | 52    | 35      | 18      | A    | 0           | 403960.438   | 0.041                      | 583.6054  |
| 52   | 36     | 17     | 52    | 35      | 18      | E    | 0           | 403978.690   | 0.011                      | 583.5928  |
| 52   | 36     | 16     | 52    | 35      | 17      | E    | 0           | 404007.200   | 0.024                      | 583.6031  |
| 51   | 36     | 15     | 51    | 35      | 16      | A    | 0           | 404104.095   | -0.114                     | 572.9043  |
| 51   | 36     | 16     | 51    | 35      | 17      | A    | 0           | 404104.095   | -0.114                     | 572.9043  |
| 51   | 36     | 15     | 51    | 35      | 16      | E    | 0           | 404150.894   | -0.156                     | 572.9020  |
| 64   | 22     | 43     | 63    | 22      | 42      | A    | 0           | 404157.511   | -0.016                     | 577.6428  |
| 64   | 22     | 42     | 63    | 22      | 41      | A    | 0           | 404160.030   | -0.044                     | 577.6429  |
| 64   | 22     | 42     | 63    | 22      | 41      | E    | 0           | 404164.919   | 0.186                      | 577.6399  |
| 49   | 36     | 13     | 49    | 35      | 14      | A    | 0           | 404368.696   | -0.026                     | 552.1277  |
| 49   | 36     | 14     | 49    | 35      | 15      | A    | 0           | 404368.696   | -0.026                     | 552.1277  |
| 49   | 36     | 14     | 49    | 35      | 15      | E    | 0           | 404387.163   | -0.216                     | 552.1151  |
| 42   | 14     | 29     | 41    | 13      | 28      | A    | 0           | 404391.448   | -0.005                     | 278.7969  |
| 49   | 36     | 13     | 49    | 35      | 14      | E    | 0           | 404415.629   | -0.043                     | 552.1255  |
| 63   | 18     | 46     | 62    | 18      | 45      | A    | 0           | 404479.715   | -0.027                     | 537.1134  |
| 47   | 36     | 11     | 47    | 35      | 12      | A    | 0           | 404604.413   | -0.017                     | 532.1844  |
| 47   | 36     | 12     | 47    | 35      | 13      | A    | 0           | 404604.413   | -0.017                     | 532.1844  |
| 47   | 36     | 12     | 47    | 35      | 13      | E    | 0           | 404623.223   | -0.077                     | 532.1717  |
| 60   | 15     | 46     | 59    | 14      | 45      | E    | 0           | 404646.183   | 0.013                      | 481.2591  |
| 24   | 23     | 1      | 23    | 22      | 1       | E    | 0           | 404686.393   | -0.026                     | 216.1483  |
| 46   | 36     | 10     | 46    | 35      | 11      | A    | 0           | 404712.134   | -0.071                     | 522.5247  |
| 46   | 36     | 11     | 46    | 35      | 12      | A    | 0           | 404712.134   | -0.071                     | 522.5247  |
| 24   | 23     | 2      | 23    | 22      | 1       | A    | 0           | 404728.124   | 0.041                      | 216.1542  |
| 24   | 23     | 1      | 23    | 22      | 2       | A    | 0           | 404728.124   | 0.041                      | 216.1542  |
| 46   | 36     | 11     | 46    | 35      | 12      | E    | 0           | 404731.114   | -0.055                     | 522.5120  |
| 45   | 36     | 9      | 45    | 35      | 10      | A    | 0           | 404813.691   | 0.060                      | 513.0729  |
| 45   | 36     | 10     | 45    | 35      | 11      | A    | 0           | 404813.691   | 0.060                      | 513.0729  |
| 45   | 36     | 10     | 45    | 35      | 11      | E    | 0           | 404832.731   | 0.047                      | 513.0602  |
| 45   | 36     | 9      | 45    | 35      | 10      | E    | 0           | 404860.802   | 0.062                      | 513.0707  |
| 44   | 36     | 8      | 44    | 35      | 9       | A    | 0           | 404908.943   | -0.032                     | 503.8288  |
| 44   | 36     | 9      | 44    | 35      | 10      | A    | 0           | 404908.943   | -0.032                     | 503.8288  |
| 44   | 36     | 9      | 44    | 35      | 10      | E    | 0           | 404928.130   | 0.017                      | 503.8160  |
| 44   | 36     | 8      | 44    | 35      | 9       | E    | 0           | 404956.086   | -0.027                     | 503.8266  |
| 43   | 36     | 7      | 43    | 35      | 8       | A    | 0           | 404998.527   | 0.025                      | 494.7922  |
| 43   | 36     | 8      | 43    | 35      | 9       | A    | 0           | 404998.527   | 0.025                      | 494.7922  |
| 43   | 36     | 8      | 43    | 35      | 9       | E    | 0           | 405017.653   | -0.063                     | 494.7794  |
| 43   | 36     | 7      | 43    | 35      | 8       | E    | 0           | 405045.590   | -0.074                     | 494.7900  |
| 64   | 14     | 50     | 63    | 14      | 49      | E    | 0           | 405084.117   | -0.008                     | 533.9491  |
| 64   | 14     | 50     | 63    | 14      | 49      | A    | 0           | 405096.435   | 0.078                      | 533.9474  |
| 63   | 17     | 47     | 62    | 17      | 46      | E    | 0           | 405106.273   | -0.037                     | 531.5724  |
| 42   | 36     | 6      | 42    | 35      | 7       | E    | 0           | 405129.639   | -0.009                     | 485.9607  |
| 63   | 15     | 49     | 62    | 14      | 48      | E    | 0           | 405414.363   | 0.088                      | 520.5794  |
| 63   | 15     | 49     | 62    | 14      | 48      | A    | 0           | 405446.842   | -0.013                     | 520.5772  |
| 65   | 28     | 37     | 64    | 28      | 36      | A    | 0           | 405492.212   | 0.123                      | 645.7337  |
| 65   | 28     | 38     | 64    | 28      | 37      | A    | 0           | 405492.212   | 0.123                      | 645.7337  |
| 65   | 28     | 37     | 64    | 28      | 36      | E    | 0           | 405493.905   | -0.272                     | 645.7230  |
| 65   | 28     | 37     | 64    | 28      | 37      | E    | 0           | 405495.753   | -0.069                     | 645.7230  |
| 61   | 16     | 45     | 60    | 16      | 44      | A    | 0           | 405520.222   | -0.067                     | 501.5316  |
| 61   | 16     | 45     | 60    | 16      | 44      | E    | 0           | 405531.482   | -0.047                     | 501.5358  |
| 26   | 22     | 4      | 25    | 21      | 4       | E    | 0           | 405547.665   | -0.045                     | 218.0183  |



| $J'$ | $K'_a$ | $K'_c$ | $J''$ | $K''_a$ | $K''_c$ | Sym. | $v_{tCH_3}$ | $\nu_{Obs.}$ | $\nu_{Obs.} - \nu_{Calc.}$ | $E_{low}$ |
|------|--------|--------|-------|---------|---------|------|-------------|--------------|----------------------------|-----------|
| 26   | 22     | 5      | 25    | 21      | 5       | E    | 0           | 405585.044   | 0.024                      | 218.0092  |
| 26   | 22     | 4      | 25    | 21      | 5       | A    | 0           | 405591.652   | -0.074                     | 218.0226  |
| 26   | 22     | 5      | 25    | 21      | 4       | A    | 0           | 405591.652   | -0.074                     | 218.0226  |
| 64   | 21     | 44     | 63    | 21      | 43      | A    | 0           | 405645.496   | 0.085                      | 570.0960  |
| 64   | 21     | 44     | 63    | 21      | 43      | E    | 0           | 405663.252   | 0.153                      | 570.0863  |
| 64   | 21     | 43     | 63    | 21      | 42      | E    | 0           | 405665.064   | -0.037                     | 570.0953  |
| 64   | 21     | 43     | 63    | 21      | 42      | A    | 0           | 405668.497   | -0.076                     | 570.0969  |
| 42   | 14     | 29     | 41    | 13      | 29      | E    | 0           | 405847.286   | -0.004                     | 278.7467  |
| 70   | 9      | 61     | 69    | 9       | 60      | A    | 1           | 405989.950   | -0.015                     | 705.6832  |
| 70   | 10     | 61     | 69    | 9       | 60      | A    | 1           | 405989.950   | -0.015                     | 705.6832  |
| 70   | 10     | 61     | 69    | 10      | 60      | A    | 1           | 405989.950   | -0.014                     | 705.6832  |
| 70   | 10     | 61     | 69    | 10      | 60      | A    | 1           | 405989.950   | -0.014                     | 705.6832  |
| 69   | 10     | 59     | 68    | 10      | 58      | A    | 1           | 406032.033   | 0.063                      | 700.8241  |
| 69   | 10     | 59     | 68    | 11      | 58      | A    | 1           | 406032.033   | 0.090                      | 700.8241  |
| 69   | 11     | 59     | 68    | 10      | 58      | A    | 1           | 406032.033   | 0.048                      | 700.8241  |
| 69   | 11     | 59     | 68    | 11      | 58      | A    | 1           | 406032.033   | 0.076                      | 700.8241  |
| 70   | 9      | 61     | 69    | 9       | 60      | E    | 1           | 406125.462   | 0.046                      | 705.6683  |
| 70   | 9      | 61     | 69    | 10      | 60      | E    | 1           | 406125.462   | 0.047                      | 705.6683  |
| 70   | 10     | 61     | 69    | 9       | 60      | E    | 1           | 406125.462   | 0.045                      | 705.6683  |
| 70   | 10     | 61     | 69    | 10      | 60      | E    | 1           | 406125.462   | 0.047                      | 705.6683  |
| 69   | 10     | 59     | 68    | 10      | 58      | E    | 1           | 406176.842   | -0.002                     | 700.8166  |
| 69   | 10     | 59     | 68    | 11      | 58      | E    | 1           | 406176.842   | 0.033                      | 700.8166  |
| 69   | 11     | 59     | 68    | 10      | 58      | E    | 1           | 406176.842   | -0.021                     | 700.8166  |
| 69   | 11     | 59     | 68    | 11      | 58      | E    | 1           | 406176.842   | 0.014                      | 700.8166  |
| 70   | 9      | 61     | 69    | 9       | 60      | E    | 0           | 406230.734   | 0.002                      | 577.4206  |
| 70   | 10     | 61     | 69    | 10      | 60      | E    | 0           | 406230.734   | 0.002                      | 577.4206  |
| 70   | 9      | 61     | 69    | 9       | 60      | A    | 0           | 406234.956   | 0.008                      | 577.4201  |
| 70   | 9      | 61     | 69    | 10      | 60      | A    | 0           | 406234.956   | 0.009                      | 577.4201  |
| 70   | 10     | 61     | 69    | 9       | 60      | A    | 0           | 406234.956   | 0.007                      | 577.4201  |
| 70   | 10     | 61     | 69    | 10      | 60      | A    | 0           | 406234.956   | 0.008                      | 577.4201  |
| 69   | 10     | 59     | 68    | 10      | 58      | E    | 0           | 406281.792   | -0.018                     | 572.5718  |
| 69   | 11     | 59     | 68    | 11      | 58      | E    | 0           | 406281.792   | -0.003                     | 572.5718  |
| 69   | 10     | 59     | 68    | 10      | 58      | A    | 0           | 406286.305   | -0.021                     | 572.5715  |
| 69   | 10     | 59     | 68    | 11      | 58      | A    | 0           | 406286.305   | 0.011                      | 572.5715  |
| 69   | 11     | 59     | 68    | 10      | 58      | A    | 0           | 406286.305   | -0.037                     | 572.5715  |
| 69   | 11     | 59     | 68    | 11      | 58      | A    | 0           | 406286.305   | -0.006                     | 572.5715  |
| 42   | 14     | 28     | 41    | 13      | 29      | A    | 0           | 406296.442   | 0.002                      | 278.7449  |
| 28   | 21     | 7      | 27    | 20      | 7       | E    | 0           | 406392.457   | -0.071                     | 221.1124  |
| 28   | 21     | 8      | 27    | 20      | 8       | E    | 0           | 406426.144   | 0.036                      | 221.1022  |
| 28   | 21     | 8      | 27    | 20      | 7       | A    | 0           | 406438.229   | -0.063                     | 221.1152  |
| 28   | 21     | 7      | 27    | 20      | 8       | A    | 0           | 406438.229   | -0.063                     | 221.1152  |
| 67   | 12     | 55     | 66    | 13      | 54      | A    | 1           | 406551.302   | 0.446                      | 689.5327  |
| 67   | 12     | 55     | 66    | 12      | 54      | A    | 1           | 406565.734   | 0.302                      | 689.5322  |
| 67   | 13     | 55     | 66    | 12      | 54      | A    | 1           | 406573.925   | 0.204                      | 689.5322  |
| 65   | 14     | 51     | 64    | 15      | 50      | A    | 0           | 406580.118   | -0.015                     | 547.5588  |
| 65   | 14     | 51     | 64    | 15      | 50      | E    | 0           | 406581.807   | -0.112                     | 547.5597  |
| 67   | 12     | 55     | 66    | 13      | 54      | A    | 0           | 406828.822   | -0.022                     | 561.2908  |
| 67   | 13     | 55     | 66    | 13      | 54      | A    | 0           | 406837.902   | -0.144                     | 561.2908  |
| 67   | 12     | 55     | 66    | 12      | 54      | E    | 0           | 406839.446   | -0.011                     | 561.2905  |
| 67   | 13     | 55     | 66    | 12      | 54      | A    | 0           | 406854.157   | -0.019                     | 561.2902  |
| 30   | 20     | 10     | 29    | 19      | 10      | E    | 0           | 407200.385   | 0.061                      | 225.4405  |
| 30   | 20     | 11     | 29    | 19      | 11      | E    | 0           | 407229.617   | -0.027                     | 225.4293  |
| 30   | 20     | 10     | 29    | 19      | 11      | A    | 0           | 407247.164   | -0.035                     | 225.4416  |
| 30   | 20     | 11     | 29    | 19      | 10      | A    | 0           | 407247.164   | -0.035                     | 225.4416  |
| 66   | 13     | 53     | 65    | 14      | 52      | E    | 0           | 407358.682   | -0.045                     | 554.7640  |
| 66   | 13     | 53     | 65    | 14      | 52      | A    | 0           | 407364.171   | 0.002                      | 554.7635  |
| 64   | 20     | 45     | 63    | 20      | 44      | E    | 0           | 407500.056   | -0.042                     | 563.0506  |
| 65   | 25     | 41     | 64    | 25      | 40      | A    | 0           | 407608.597   | -0.108                     | 616.4579  |
| 65   | 25     | 40     | 64    | 25      | 39      | A    | 0           | 407608.597   | -0.111                     | 616.4579  |
| 66   | 13     | 53     | 65    | 13      | 52      | A    | 0           | 407617.643   | -0.021                     | 554.7551  |
| 64   | 20     | 44     | 63    | 20      | 43      | E    | 0           | 407632.561   | 0.169                      | 563.0629  |
| 32   | 19     | 13     | 31    | 18      | 13      | E    | 0           | 407936.077   | -0.206                     | 231.0160  |
| 32   | 19     | 14     | 31    | 18      | 14      | E    | 0           | 407960.850   | 0.022                      | 231.0040  |
| 40   | 15     | 25     | 39    | 14      | 25      | E    | 0           | 407980.917   | -0.101                     | 266.3557  |
| 32   | 19     | 14     | 31    | 18      | 13      | A    | 0           | 407983.650   | 0.038                      | 231.0155  |
| 32   | 19     | 13     | 31    | 18      | 14      | A    | 0           | 407983.650   | 0.038                      | 231.0155  |
| 40   | 15     | 26     | 39    | 14      | 25      | A    | 0           | 407995.871   | 0.042                      | 266.3494  |
| 64   | 15     | 50     | 63    | 14      | 49      | E    | 0           | 408036.395   | -0.062                     | 533.9491  |
| 40   | 15     | 25     | 39    | 14      | 26      | A    | 0           | 408053.421   | -0.012                     | 266.3477  |
| 64   | 15     | 50     | 63    | 14      | 49      | A    | 0           | 408061.096   | -0.016                     | 533.9474  |
| 65   | 15     | 51     | 64    | 15      | 50      | E    | 0           | 408448.493   | -0.059                     | 547.5597  |
| 65   | 15     | 51     | 64    | 15      | 50      | A    | 0           | 408454.904   | -0.058                     | 547.5588  |
| 43   | 14     | 30     | 42    | 13      | 29      | E    | 0           | 408516.116   | -0.013                     | 287.7586  |
| 64   | 16     | 49     | 63    | 16      | 48      | E    | 0           | 408536.181   | -0.273                     | 539.7028  |
| 65   | 24     | 41     | 64    | 24      | 40      | A    | 0           | 408537.683   | 0.045                      | 607.5594  |
| 34   | 18     | 16     | 33    | 17      | 16      | E    | 0           | 408541.034   | -0.061                     | 237.8584  |
| 34   | 18     | 17     | 33    | 17      | 17      | E    | 0           | 408560.318   | -0.012                     | 237.8457  |
| 34   | 18     | 16     | 33    | 17      | 17      | A    | 0           | 408588.139   | -0.056                     | 237.8562  |
| 34   | 18     | 17     | 33    | 17      | 16      | A    | 0           | 408588.139   | -0.056                     | 237.8562  |
| 43   | 14     | 30     | 42    | 13      | 29      | A    | 0           | 408629.040   | 0.042                      | 287.7552  |
| 38   | 16     | 22     | 37    | 15      | 22      | E    | 0           | 408854.761   | -0.203                     | 255.4715  |
| 38   | 16     | 23     | 37    | 15      | 23      | E    | 0           | 408861.480   | -0.064                     | 255.4584  |
| 38   | 16     | 23     | 37    | 15      | 22      | A    | 0           | 408899.439   | 0.441                      | 255.4660  |
| 36   | 17     | 19     | 35    | 16      | 19      | E    | 0           | 408911.002   | -0.056                     | 245.9958  |
| 36   | 17     | 20     | 35    | 16      | 20      | E    | 0           | 408924.363   | -0.012                     | 245.9828  |
| 36   | 17     | 20     | 35    | 16      | 19      | A    | 0           | 408957.187   | -0.035                     | 245.9920  |
| 65   | 14     | 51     | 64    | 14      | 50      | E    | 0           | 409534.227   | -0.024                     | 547.4612  |
| 64   | 19     | 46     | 63    | 19      | 45      | A    | 0           | 409571.854   | 0.029                      | 556.5586  |
| 66   | 33     | 34     | 65    | 33      | 33      | A    | 0           | 409625.896   | -0.087                     | 716.2049  |
| 66   | 33     | 33     | 65    | 33      | 32      | A    | 0           | 409625.896   | -0.087                     | 716.2049  |
| 66   | 33     | 33     | 65    | 33      | 32      | E    | 0           | 409625.896   | 0.078                      | 716.1996  |
| 65   | 23     | 43     | 64    | 23      | 42      | A    | 0           | 409629.928   | 0.222                      | 599.1092  |
| 65   | 23     | 43     | 64    | 23      | 42      | E    | 0           | 409635.549   | 0.125                      | 599.0979  |
| 25   | 23     | 2      | 24    | 22      | 2       | E    | 0           | 410829.655   | -0.027                     | 221.0738  |
| 25   | 23     | 3      | 24    | 22      | 3       | E    | 0           | 410869.916   | -0.235                     | 221.0660  |
| 25   | 23     | 3      | 24    | 22      | 2       | A    | 0           | 410871.407   | 0.057                      | 221.0797  |
| 25   | 23     | 2      | 24    | 22      | 3       | A    | 0           | 410871.407   | 0.057                      | 221.0797  |
| 65   | 22     | 44     | 64    | 22      | 43      | A    | 0           | 410936.729   | 0.033                      | 591.1240  |
| 65   | 22     | 43     | 64    | 22      | 42      | A    | 0           | 410941.538   | 0.073                      | 591.1242  |
| 65   | 22     | 44     | 64    | 22      | 43      | E    | 0           | 410945.635   | -0.097                     | 591.1134  |
| 70   | 10     | 60     | 69    | 10      | 59      | A    | 1           | 411121.754   | 0.046                      | 714.3679  |
| 70   | 10     | 60     | 69    | 11      | 59      | A    | 1           | 411121.754   | 0.061                      | 714.3679  |
| 70   | 11     | 60     | 69    | 10      | 59      | A    | 1           | 411121.754   | 0.038                      | 714.3679  |
| 70   | 11     | 60     | 69    | 11      | 59      | A    | 1           | 411121.754   | 0.053                      | 714.3679  |
| 70   | 10     | 60     | 69    | 10      | 59      | E    | 1           | 411263.378   | 0.075                      | 714.3652  |
| 70   | 10     | 60     | 69    | 11      | 59      | E    | 1           | 411263.378   | 0.094                      | 714.3652  |
| 70   | 11     | 60     | 69    | 10      | 59      | E    | 1           | 411263.378   | 0.065                      | 714.3652  |
| 70   | 11     | 60     | 69    | 11      | 59      | E    | 1           | 411263.378   | 0.084                      | 714.3652  |
| 69   | 11     | 58     | 68    | 11      | 57      | A    | 1           | 411267.995   | 0.118                      | 709.0028  |
| 69   | 11     | 58     | 68    | 12      | 57      | A    | 1           | 411267.995   | 0.508                      | 709.0028  |
| 69   | 12     | 58     | 68    | 11      | 57      | A    | 1           | 411267.995   | -0.094                     | 709.0028  |
| 69   | 12     | 58     | 68    | 12      | 57      | A    | 1           | 411267.995   | 0.295                      | 709.0028  |
| 64   | 18     | 47     | 63    | 18      | 46      | A    | 0           | 411352.265   | 0.013                      | 550.6054  |
| 65   | 15     | 51     | 64    | 14      | 50      | E    | 0           | 411400.878   | -0.006                     | 547.4612  |
| 69   | 11     | 58     | 68    | 11      | 57      | E    | 0           | 411527.428   | -0.079                     | 580.7662  |
| 69   | 12     | 58     | 68    | 12      | 57      | E    | 0           | 411527.428   | 0.119                      | 580.7662  |



| $J'$ | $K'_a$ | $K'_c$ | $J''$ | $K''_a$ | $K''_c$ | Sym. | $v_{tCH_3}$ | $\nu_{Obs.}$ | $\nu_{Obs.} - \nu_{Calc.}$ | $E_{low}$ |
|------|--------|--------|-------|---------|---------|------|-------------|--------------|----------------------------|-----------|
| 69   | 11     | 58     | 68    | 11      | 57      | A    | 0           | 411532.175   | -0.109                     | 580.7662  |
| 69   | 11     | 58     | 68    | 12      | 57      | A    | 0           | 411532.175   | 0.331                      | 580.7662  |
| 69   | 12     | 58     | 68    | 11      | 57      | A    | 0           | 411532.175   | -0.351                     | 580.7662  |
| 69   | 12     | 58     | 68    | 12      | 57      | A    | 0           | 411532.175   | 0.090                      | 580.7662  |
| 27   | 22     | 5      | 26    | 21      | 5       | E    | 0           | 411687.168   | -0.051                     | 223.3605  |
| 27   | 22     | 6      | 26    | 21      | 6       | E    | 0           | 411724.605   | 0.109                      | 223.3514  |
| 27   | 22     | 5      | 26    | 21      | 6       | A    | 0           | 411731.163   | -0.073                     | 223.3648  |
| 27   | 22     | 6      | 26    | 21      | 5       | A    | 0           | 411731.163   | -0.073                     | 223.3648  |
| 68   | 12     | 56     | 67    | 13      | 55      | A    | 0           | 411865.213   | -0.302                     | 574.8614  |
| 68   | 12     | 56     | 67    | 12      | 55      | E    | 0           | 411869.002   | -0.395                     | 574.8612  |
| 68   | 12     | 56     | 67    | 12      | 55      | A    | 0           | 411874.623   | -0.094                     | 574.8611  |
| 68   | 13     | 56     | 67    | 12      | 55      | A    | 0           | 411879.911   | -0.023                     | 574.8611  |
| 66   | 15     | 51     | 65    | 16      | 50      | E    | 0           | 411952.903   | 0.054                      | 567.1362  |
| 43   | 14     | 29     | 42    | 13      | 30      | E    | 0           | 411959.801   | -0.071                     | 287.6681  |
| 66   | 28     | 38     | 65    | 28      | 37      | A    | 0           | 411972.255   | -0.078                     | 659.2594  |
| 66   | 28     | 39     | 65    | 28      | 38      | A    | 0           | 411972.255   | -0.078                     | 659.2594  |
| 44   | 14     | 31     | 43    | 13      | 30      | E    | 0           | 412126.875   | 0.003                      | 296.9673  |
| 68   | 37     | 32     | 68    | 36      | 33      | A    | 0           | 412152.287   | -0.077                     | 796.7008  |
| 68   | 37     | 31     | 68    | 36      | 32      | A    | 0           | 412152.287   | -0.077                     | 796.7008  |
| 68   | 37     | 32     | 68    | 36      | 33      | E    | 0           | 412172.186   | -0.231                     | 796.6892  |
| 44   | 14     | 31     | 43    | 13      | 30      | A    | 0           | 412218.156   | -0.041                     | 296.9637  |
| 66   | 14     | 52     | 65    | 15      | 51      | E    | 0           | 412261.159   | -0.186                     | 561.1841  |
| 66   | 14     | 52     | 65    | 15      | 51      | A    | 0           | 412262.658   | 0.154                      | 561.1834  |
| 67   | 13     | 54     | 66    | 14      | 53      | E    | 1           | 412297.307   | 0.251                      | 696.5809  |
| 67   | 13     | 54     | 66    | 14      | 53      | E    | 0           | 412399.030   | 0.037                      | 568.3571  |
| 67   | 13     | 54     | 66    | 14      | 53      | A    | 0           | 412404.583   | 0.046                      | 568.3568  |
| 29   | 21     | 8      | 28    | 20      | 8       | E    | 0           | 412523.398   | -0.025                     | 226.8740  |
| 65   | 21     | 45     | 64    | 21      | 44      | A    | 0           | 412529.963   | -0.198                     | 583.6269  |
| 29   | 21     | 9      | 28    | 20      | 9       | E    | 0           | 412556.895   | -0.054                     | 226.8637  |
| 65   | 21     | 44     | 64    | 21      | 43      | E    | 0           | 412562.995   | 0.000                      | 583.6268  |
| 29   | 21     | 9      | 28    | 20      | 8       | A    | 0           | 412569.109   | -0.074                     | 226.8767  |
| 29   | 21     | 8      | 28    | 20      | 9       | A    | 0           | 412569.109   | -0.074                     | 226.8767  |
| 65   | 21     | 44     | 64    | 21      | 43      | A    | 0           | 412571.492   | 0.036                      | 583.6286  |
| 66   | 27     | 40     | 65    | 27      | 39      | A    | 0           | 412621.134   | 0.649                      | 649.0997  |
| 66   | 27     | 39     | 65    | 27      | 38      | A    | 0           | 412621.134   | -0.110                     | 649.0997  |
| 66   | 27     | 40     | 65    | 27      | 39      | E    | 0           | 412623.662   | 0.036                      | 649.0886  |
| 66   | 27     | 39     | 65    | 27      | 38      | E    | 0           | 412625.597   | 0.039                      | 649.0901  |
| 67   | 14     | 54     | 66    | 13      | 53      | E    | 0           | 412638.142   | 0.045                      | 568.3521  |
| 67   | 14     | 54     | 66    | 13      | 53      | A    | 0           | 412645.087   | 0.172                      | 568.3517  |
| 44   | 13     | 31     | 43    | 12      | 32      | E    | 0           | 412662.273   | -0.046                     | 292.6701  |
| 44   | 13     | 31     | 43    | 12      | 32      | A    | 0           | 412672.962   | 0.139                      | 292.6659  |
| 66   | 37     | 30     | 66    | 36      | 31      | A    | 0           | 412725.310   | -0.259                     | 768.8033  |
| 66   | 37     | 29     | 66    | 36      | 30      | A    | 0           | 412725.310   | -0.259                     | 768.8033  |
| 66   | 37     | 30     | 66    | 36      | 31      | E    | 0           | 412746.023   | -0.158                     | 768.7916  |
| 66   | 37     | 29     | 66    | 36      | 30      | E    | 0           | 412771.403   | -0.047                     | 768.8022  |
| 62   | 16     | 46     | 61    | 16      | 45      | A    | 0           | 412812.969   | 0.124                      | 515.0583  |
| 62   | 16     | 46     | 61    | 16      | 45      | E    | 0           | 412818.236   | -0.034                     | 515.0628  |
| 64   | 37     | 28     | 64    | 36      | 29      | A    | 0           | 413249.118   | -0.101                     | 741.7504  |
| 64   | 37     | 27     | 64    | 36      | 28      | A    | 0           | 413249.118   | -0.101                     | 741.7504  |
| 31   | 20     | 11     | 30    | 19      | 11      | E    | 0           | 413314.868   | -0.059                     | 231.6249  |
| 31   | 20     | 12     | 30    | 19      | 12      | E    | 0           | 413344.173   | 0.007                      | 231.6136  |
| 31   | 20     | 11     | 30    | 19      | 12      | A    | 0           | 413361.757   | -0.036                     | 231.6260  |
| 31   | 20     | 12     | 30    | 19      | 11      | A    | 0           | 413361.757   | -0.036                     | 231.6260  |
| 66   | 15     | 52     | 65    | 15      | 51      | E    | 0           | 413426.076   | -0.106                     | 561.1841  |
| 66   | 15     | 52     | 65    | 15      | 51      | A    | 0           | 413432.618   | -0.041                     | 561.1834  |
| 63   | 37     | 27     | 63    | 36      | 28      | A    | 0           | 413493.430   | -0.066                     | 728.5401  |
| 63   | 37     | 26     | 63    | 36      | 27      | A    | 0           | 413493.430   | -0.066                     | 728.5401  |
| 63   | 37     | 27     | 63    | 36      | 28      | E    | 0           | 413514.815   | -0.039                     | 728.5284  |
| 41   | 15     | 27     | 40    | 14      | 26      | A    | 0           | 413522.225   | -0.100                     | 274.7714  |
| 41   | 15     | 26     | 40    | 14      | 26      | E    | 0           | 413531.324   | -0.051                     | 274.7772  |
| 41   | 15     | 27     | 40    | 14      | 27      | E    | 0           | 413540.535   | -0.048                     | 274.7641  |
| 41   | 15     | 26     | 40    | 14      | 27      | A    | 0           | 413636.061   | -0.057                     | 274.7682  |
| 43   | 12     | 31     | 42    | 11      | 32      | A    | 0           | 413645.361   | -0.084                     | 279.5944  |
| 43   | 12     | 31     | 42    | 11      | 32      | E    | 0           | 413667.524   | -0.079                     | 279.5995  |
| 62   | 37     | 26     | 62    | 36      | 27      | A    | 0           | 413726.590   | -0.012                     | 715.5404  |
| 62   | 37     | 25     | 62    | 36      | 26      | A    | 0           | 413726.590   | -0.012                     | 715.5404  |
| 62   | 37     | 25     | 62    | 36      | 26      | E    | 0           | 413773.156   | 0.169                      | 715.5395  |
| 65   | 16     | 50     | 64    | 16      | 49      | E    | 0           | 413895.821   | -0.028                     | 553.3302  |
| 65   | 16     | 50     | 64    | 16      | 49      | A    | 0           | 413899.865   | -0.116                     | 553.3292  |
| 61   | 37     | 25     | 61    | 36      | 26      | A    | 0           | 413948.892   | -0.030                     | 702.7511  |
| 61   | 37     | 24     | 61    | 36      | 25      | A    | 0           | 413948.892   | -0.030                     | 702.7511  |
| 61   | 37     | 24     | 61    | 36      | 25      | E    | 0           | 413995.414   | -0.000                     | 702.7502  |
| 33   | 19     | 14     | 32    | 18      | 14      | E    | 0           | 414022.383   | -0.078                     | 237.6279  |
| 33   | 19     | 15     | 32    | 18      | 15      | E    | 0           | 414046.874   | -0.006                     | 237.6158  |
| 33   | 19     | 15     | 32    | 18      | 14      | A    | 0           | 414069.721   | -0.051                     | 237.6273  |
| 33   | 19     | 14     | 32    | 18      | 15      | A    | 0           | 414069.721   | -0.051                     | 237.6273  |
| 66   | 14     | 52     | 65    | 14      | 51      | E    | 0           | 414127.956   | -0.022                     | 561.1218  |
| 66   | 14     | 52     | 65    | 14      | 51      | A    | 0           | 414137.231   | -0.101                     | 561.1209  |
| 60   | 37     | 24     | 60    | 36      | 25      | A    | 0           | 414160.792   | -0.036                     | 690.1718  |
| 60   | 37     | 23     | 60    | 36      | 24      | A    | 0           | 414160.792   | -0.036                     | 690.1718  |
| 66   | 25     | 42     | 65    | 25      | 41      | A    | 0           | 414206.154   | -0.165                     | 630.0542  |
| 66   | 25     | 41     | 65    | 25      | 40      | A    | 0           | 414206.154   | -0.172                     | 630.0542  |
| 66   | 25     | 42     | 65    | 25      | 41      | E    | 0           | 414209.993   | -0.153                     | 630.0426  |
| 66   | 25     | 41     | 65    | 25      | 40      | E    | 0           | 414211.513   | 0.055                      | 630.0470  |
| 59   | 37     | 23     | 59    | 36      | 24      | A    | 0           | 414362.613   | -0.070                     | 677.8025  |
| 59   | 37     | 22     | 59    | 36      | 23      | A    | 0           | 414362.613   | -0.070                     | 677.8025  |
| 59   | 37     | 23     | 59    | 36      | 24      | E    | 0           | 414384.793   | -0.086                     | 677.7906  |
| 59   | 37     | 22     | 59    | 36      | 23      | E    | 0           | 414409.293   | -0.073                     | 677.8016  |
| 65   | 20     | 46     | 64    | 20      | 45      | A    | 0           | 414470.548   | -0.061                     | 576.6487  |
| 65   | 20     | 46     | 64    | 20      | 45      | E    | 0           | 414496.554   | 0.324                      | 576.6433  |
| 58   | 37     | 22     | 58    | 36      | 23      | A    | 0           | 414554.766   | -0.073                     | 665.6429  |
| 58   | 37     | 21     | 58    | 36      | 22      | A    | 0           | 414554.766   | -0.073                     | 665.6429  |
| 35   | 18     | 17     | 34    | 17      | 17      | E    | 0           | 414579.253   | -0.061                     | 244.9040  |
| 35   | 18     | 18     | 34    | 17      | 18      | E    | 0           | 414598.348   | -0.010                     | 244.8914  |
| 58   | 37     | 21     | 58    | 36      | 22      | E    | 0           | 414601.655   | 0.047                      | 665.6421  |
| 35   | 18     | 17     | 34    | 17      | 18      | A    | 0           | 414626.351   | -0.034                     | 244.9018  |
| 35   | 18     | 18     | 34    | 17      | 17      | A    | 0           | 414626.351   | -0.034                     | 244.9018  |
| 39   | 16     | 23     | 38    | 15      | 23      | E    | 0           | 414672.646   | -0.074                     | 263.4157  |
| 39   | 16     | 24     | 38    | 15      | 24      | E    | 0           | 414678.797   | -0.016                     | 263.4027  |
| 39   | 16     | 24     | 38    | 15      | 23      | A    | 0           | 414716.080   | -0.025                     | 263.4102  |
| 39   | 16     | 23     | 38    | 15      | 24      | A    | 0           | 414718.060   | -0.170                     | 263.4102  |
| 57   | 37     | 21     | 57    | 36      | 22      | A    | 0           | 414737.498   | -0.143                     | 653.6929  |
| 57   | 37     | 20     | 57    | 36      | 21      | A    | 0           | 414737.498   | -0.143                     | 653.6929  |
| 65   | 20     | 45     | 64    | 20      | 44      | E    | 0           | 414763.931   | 0.058                      | 576.6601  |
| 65   | 20     | 45     | 64    | 20      | 44      | A    | 0           | 414771.497   | 0.069                      | 576.6625  |
| 57   | 37     | 20     | 57    | 36      | 21      | E    | 0           | 414784.553   | 0.065                      | 653.6921  |
| 45   | 14     | 32     | 44    | 13      | 31      | E    | 0           | 414830.949   | -0.010                     | 306.4351  |
| 37   | 17     | 20     | 36    | 16      | 20      | E    | 0           | 414868.530   | -0.066                     | 253.4842  |
| 37   | 17     | 21     | 36    | 16      | 21      | E    | 0           | 414881.593   | -0.022                     | 253.4712  |
| 48   | 14     | 35     | 47    | 13      | 34      | E    | 0           | 414894.038   | -0.052                     | 336.4783  |
| 56   | 37     | 20     | 56    | 36      | 21      | A    | 0           | 414911.349   | -0.074                     | 641.9523  |
| 56   | 37     | 19     | 56    | 36      | 20      | A    | 0           | 414911.349   | -0.074                     | 641.9523  |
| 37   | 17     | 21     | 36    | 16      | 20      | A    | 0           | 414914.696   | -0.012                     | 253.4803  |
| 56   | 37     | 20     | 56    | 36      | 21      | E    | 0           | 414934.029   | -0.110                     | 641.9404  |
| 56   | 37     | 19     | 56    | 36      | 20      | E    | 0           | 414958.867   | 0.524                      | 641.9515  |
| 55   | 37     | 19     | 55    | 36      | 20      | A    | 0           | 415076.458   | -0.053                     | 630.4209  |



| $J'$ | $K'_a$ | $K'_c$ | $J''$ | $K''_a$ | $K''_c$ | Sym. | $v_{tCH_3}$ | $\nu_{Obs.}$ | $\nu_{Obs.} - \nu_{Calc.}$ | $E_{low}$ |
|------|--------|--------|-------|---------|---------|------|-------------|--------------|----------------------------|-----------|
| 55   | 37     | 18     | 55    | 36      | 19      | A    | 0           | 415076.458   | -0.053                     | 630.4209  |
| 55   | 37     | 19     | 55    | 36      | 20      | E    | 0           | 415099.319   | -0.064                     | 630.4089  |
| 55   | 37     | 18     | 55    | 36      | 19      | E    | 0           | 415123.494   | -0.005                     | 630.4201  |
| 66   | 24     | 43     | 65    | 24      | 42      | A    | 0           | 415190.890   | 0.011                      | 621.1867  |
| 64   | 15     | 49     | 63    | 15      | 48      | E    | 0           | 415223.845   | -0.018                     | 538.9550  |
| 54   | 37     | 18     | 54    | 36      | 19      | A    | 0           | 415233.167   | -0.058                     | 619.0985  |
| 54   | 37     | 17     | 54    | 36      | 18      | A    | 0           | 415233.167   | -0.058                     | 619.0985  |
| 64   | 15     | 49     | 63    | 15      | 48      | A    | 0           | 415242.976   | -0.014                     | 538.9517  |
| 54   | 37     | 18     | 54    | 36      | 19      | E    | 0           | 415256.140   | -0.102                     | 619.0865  |
| 54   | 37     | 17     | 54    | 36      | 18      | E    | 0           | 415280.295   | 0.022                      | 619.0977  |
| 66   | 15     | 52     | 65    | 14      | 51      | E    | 0           | 415292.922   | 0.108                      | 561.1218  |
| 66   | 15     | 52     | 65    | 14      | 51      | A    | 0           | 415307.491   | 0.003                      | 561.1209  |
| 53   | 37     | 17     | 53    | 36      | 18      | A    | 0           | 415381.771   | -0.100                     | 607.9849  |
| 53   | 37     | 16     | 53    | 36      | 17      | A    | 0           | 415381.771   | -0.100                     | 607.9849  |
| 53   | 37     | 17     | 53    | 36      | 18      | E    | 0           | 415404.855   | -0.170                     | 607.9729  |
| 53   | 37     | 16     | 53    | 36      | 17      | E    | 0           | 415429.131   | 0.155                      | 607.9842  |
| 52   | 37     | 16     | 52    | 36      | 17      | A    | 0           | 415522.709   | -0.045                     | 597.0801  |
| 52   | 37     | 15     | 52    | 36      | 16      | A    | 0           | 415522.709   | -0.045                     | 597.0801  |
| 52   | 37     | 16     | 52    | 36      | 17      | E    | 0           | 415545.979   | -0.058                     | 597.0681  |
| 52   | 37     | 15     | 52    | 36      | 16      | E    | 0           | 415570.102   | 0.194                      | 597.0793  |
| 67   | 34     | 34     | 66    | 34      | 33      | E    | 0           | 415641.282   | -0.277                     | 742.4382  |
| 51   | 37     | 15     | 51    | 36      | 16      | A    | 0           | 415656.105   | -0.060                     | 586.3837  |
| 51   | 37     | 14     | 51    | 36      | 15      | A    | 0           | 415656.105   | -0.060                     | 586.3837  |
| 51   | 37     | 15     | 51    | 36      | 16      | E    | 0           | 415679.568   | -0.003                     | 586.3717  |
| 50   | 37     | 14     | 50    | 36      | 15      | A    | 0           | 415782.374   | -0.020                     | 575.8958  |
| 50   | 37     | 13     | 50    | 36      | 14      | A    | 0           | 415782.374   | -0.020                     | 575.8958  |
| 50   | 37     | 13     | 50    | 36      | 14      | E    | 0           | 415829.532   | -0.104                     | 575.8951  |
| 49   | 37     | 13     | 49    | 36      | 14      | A    | 0           | 415901.663   | -0.056                     | 565.6160  |
| 49   | 37     | 12     | 49    | 36      | 13      | A    | 0           | 415901.663   | -0.056                     | 565.6160  |
| 49   | 37     | 12     | 49    | 36      | 13      | E    | 0           | 415948.944   | -0.053                     | 565.6153  |
| 63   | 17     | 46     | 62    | 17      | 45      | A    | 0           | 415973.398   | 0.011                      | 532.5114  |
| 63   | 17     | 46     | 62    | 17      | 45      | E    | 0           | 415992.813   | -0.032                     | 532.5139  |
| 48   | 37     | 12     | 48    | 36      | 13      | A    | 0           | 416014.413   | 0.001                      | 555.5443  |
| 48   | 37     | 11     | 48    | 36      | 12      | A    | 0           | 416014.413   | 0.001                      | 555.5443  |
| 48   | 37     | 12     | 48    | 36      | 13      | E    | 0           | 416038.077   | -0.062                     | 555.5323  |
| 48   | 37     | 11     | 48    | 36      | 12      | E    | 0           | 416061.865   | 0.142                      | 555.5436  |
| 24   | 24     | 0      | 23    | 23      | 0       | E    | 0           | 416108.393   | -0.023                     | 224.7235  |
| 47   | 37     | 11     | 47    | 36      | 12      | A    | 0           | 416120.903   | 0.163                      | 545.6805  |
| 47   | 37     | 10     | 47    | 36      | 11      | A    | 0           | 416120.903   | 0.163                      | 545.6805  |
| 47   | 37     | 11     | 47    | 36      | 12      | E    | 0           | 416144.528   | -0.031                     | 545.6684  |
| 24   | 24     | 0      | 23    | 23      | 1       | A    | 0           | 416147.104   | -0.070                     | 224.7308  |
| 24   | 24     | 1      | 23    | 23      | 0       | A    | 0           | 416147.104   | -0.070                     | 224.7308  |
| 24   | 24     | 1      | 23    | 23      | 1       | E    | 0           | 416151.535   | 0.051                      | 224.7170  |
| 47   | 37     | 10     | 47    | 36      | 11      | E    | 0           | 416167.981   | -0.099                     | 545.6799  |
| 46   | 37     | 10     | 46    | 36      | 11      | A    | 0           | 416221.011   | 0.052                      | 536.0245  |
| 46   | 37     | 9      | 46    | 36      | 10      | A    | 0           | 416221.011   | 0.052                      | 536.0245  |
| 46   | 37     | 10     | 46    | 36      | 11      | E    | 0           | 416244.900   | 0.034                      | 536.0124  |
| 46   | 37     | 9      | 46    | 36      | 10      | E    | 0           | 416268.124   | -0.200                     | 536.0238  |
| 45   | 37     | 9      | 45    | 36      | 10      | A    | 0           | 416315.264   | -0.061                     | 526.5760  |
| 45   | 37     | 8      | 45    | 36      | 9       | A    | 0           | 416315.264   | -0.061                     | 526.5760  |
| 45   | 37     | 9      | 45    | 36      | 10      | E    | 0           | 416339.081   | -0.232                     | 526.5639  |
| 70   | 11     | 59     | 69    | 11      | 58      | A    | 1           | 416340.659   | 0.119                      | 722.7212  |
| 70   | 11     | 59     | 69    | 12      | 58      | A    | 1           | 416340.659   | 0.331                      | 722.7212  |
| 70   | 12     | 59     | 69    | 11      | 58      | A    | 1           | 416340.659   | 0.003                      | 722.7212  |
| 70   | 12     | 59     | 69    | 12      | 58      | A    | 1           | 416340.659   | 0.216                      | 722.7212  |
| 66   | 23     | 43     | 65    | 23      | 42      | E    | 0           | 416358.854   | -0.029                     | 612.7688  |
| 67   | 32     | 35     | 66    | 32      | 34      | A    | 0           | 416398.160   | 0.050                      | 717.6854  |
| 67   | 32     | 36     | 66    | 32      | 35      | A    | 0           | 416398.160   | 0.050                      | 717.6854  |
| 67   | 32     | 35     | 66    | 32      | 34      | E    | 0           | 416398.160   | -0.100                     | 717.6787  |
| 44   | 37     | 8      | 44    | 36      | 9       | A    | 0           | 416404.167   | 0.085                      | 517.3351  |
| 44   | 37     | 7      | 44    | 36      | 8       | A    | 0           | 416404.167   | 0.085                      | 517.3351  |
| 47   | 14     | 34     | 46    | 13      | 33      | E    | 0           | 416426.724   | -0.086                     | 326.1845  |
| 46   | 14     | 33     | 45    | 13      | 32      | A    | 0           | 416433.566   | 0.014                      | 316.1672  |
| 44   | 37     | 7      | 44    | 36      | 8       | E    | 0           | 416451.401   | -0.086                     | 517.3345  |
| 64   | 18     | 46     | 63    | 18      | 45      | A    | 0           | 416455.010   | 0.003                      | 550.9337  |
| 70   | 11     | 59     | 69    | 11      | 58      | E    | 0           | 416599.502   | -0.078                     | 594.4933  |
| 70   | 12     | 59     | 69    | 12      | 58      | E    | 0           | 416599.502   | 0.031                      | 594.4933  |
| 70   | 11     | 59     | 69    | 11      | 58      | A    | 0           | 416604.152   | -0.077                     | 594.4934  |
| 70   | 11     | 59     | 69    | 12      | 58      | A    | 0           | 416604.152   | 0.164                      | 594.4934  |
| 70   | 12     | 59     | 69    | 11      | 58      | A    | 0           | 416604.152   | -0.209                     | 594.4934  |
| 70   | 12     | 59     | 69    | 12      | 58      | A    | 0           | 416604.152   | 0.033                      | 594.4934  |
| 69   | 12     | 57     | 68    | 13      | 56      | A    | 1           | 416632.145   | 0.466                      | 716.8233  |
| 69   | 13     | 57     | 68    | 13      | 56      | A    | 1           | 416634.694   | 0.383                      | 716.8233  |
| 69   | 12     | 57     | 68    | 12      | 56      | A    | 1           | 416636.738   | 0.374                      | 716.8231  |
| 69   | 13     | 57     | 68    | 12      | 56      | A    | 1           | 416639.125   | 0.130                      | 716.8231  |
| 69   | 13     | 57     | 68    | 12      | 56      | A    | 0           | 416915.143   | -0.037                     | 588.5998  |
| 26   | 23     | 3      | 25    | 22      | 3       | E    | 0           | 416971.923   | -0.027                     | 226.2063  |
| 26   | 23     | 4      | 25    | 22      | 4       | E    | 0           | 417012.144   | -0.251                     | 226.1984  |
| 26   | 23     | 4      | 25    | 22      | 3       | A    | 0           | 417013.650   | 0.028                      | 226.2121  |
| 26   | 23     | 3      | 25    | 22      | 4       | A    | 0           | 417013.650   | 0.028                      | 226.2121  |
| 68   | 13     | 55     | 67    | 14      | 54      | A    | 1           | 417142.069   | 0.224                      | 710.3386  |
| 68   | 13     | 55     | 67    | 14      | 54      | E    | 0           | 417422.897   | -0.015                     | 582.1162  |
| 68   | 13     | 55     | 67    | 14      | 54      | A    | 0           | 417428.391   | -0.041                     | 582.1161  |
| 65   | 17     | 49     | 64    | 17      | 48      | E    | 0           | 417459.945   | -0.206                     | 558.8076  |
| 68   | 14     | 55     | 67    | 14      | 54      | E    | 0           | 417475.038   | 0.065                      | 582.1162  |
| 68   | 14     | 55     | 67    | 14      | 54      | A    | 0           | 417480.808   | 0.022                      | 582.1161  |
| 68   | 14     | 55     | 67    | 13      | 54      | A    | 0           | 417569.981   | -0.095                     | 582.1131  |
| 67   | 14     | 53     | 66    | 15      | 52      | E    | 0           | 417666.189   | 0.067                      | 574.9745  |
| 67   | 14     | 53     | 66    | 15      | 52      | A    | 0           | 417669.164   | 0.012                      | 574.9740  |
| 66   | 22     | 45     | 65    | 22      | 44      | A    | 0           | 417747.952   | -0.240                     | 604.8314  |
| 66   | 22     | 44     | 65    | 22      | 43      | A    | 0           | 417756.971   | -0.016                     | 604.8318  |
| 66   | 22     | 45     | 65    | 22      | 44      | E    | 0           | 417759.446   | -0.030                     | 604.8211  |
| 28   | 22     | 6      | 27    | 21      | 6       | E    | 0           | 417824.452   | -0.067                     | 228.9104  |
| 28   | 22     | 7      | 27    | 21      | 7       | E    | 0           | 417861.854   | 0.096                      | 228.9013  |
| 28   | 22     | 6      | 27    | 21      | 7       | A    | 0           | 417868.458   | -0.079                     | 228.9147  |
| 28   | 22     | 7      | 27    | 21      | 6       | A    | 0           | 417868.458   | -0.079                     | 228.9147  |
| 65   | 18     | 48     | 64    | 18      | 47      | A    | 0           | 418116.356   | -0.026                     | 564.3267  |
| 65   | 18     | 48     | 64    | 18      | 47      | E    | 0           | 418123.451   | 0.023                      | 564.3260  |
| 65   | 19     | 46     | 64    | 19      | 45      | E    | 0           | 418372.867   | -0.121                     | 570.3132  |
| 67   | 15     | 53     | 66    | 15      | 52      | E    | 0           | 418384.529   | -0.039                     | 574.9745  |
| 67   | 15     | 53     | 66    | 15      | 52      | A    | 0           | 418390.975   | -0.026                     | 574.9740  |
| 67   | 28     | 39     | 66    | 28      | 38      | A    | 0           | 418465.456   | 0.120                      | 673.0014  |
| 67   | 28     | 40     | 66    | 28      | 39      | A    | 0           | 418465.456   | 0.120                      | 673.0014  |
| 67   | 28     | 40     | 66    | 28      | 39      | E    | 0           | 418467.126   | -0.125                     | 672.9908  |
| 67   | 28     | 39     | 66    | 28      | 38      | E    | 0           | 418469.441   | -0.012                     | 672.9909  |
| 68   | 16     | 52     | 67    | 17      | 51      | A    | 0           | 418527.630   | -0.060                     | 601.1630  |
| 68   | 16     | 52     | 67    | 17      | 51      | E    | 0           | 418577.486   | -0.020                     | 601.1635  |
| 30   | 21     | 9      | 29    | 20      | 9       | E    | 0           | 418650.275   | -0.048                     | 232.8441  |
| 30   | 21     | 10     | 29    | 20      | 10      | E    | 0           | 418683.813   | 0.024                      | 232.8339  |
| 30   | 21     | 10     | 29    | 20      | 9       | A    | 0           | 418696.016   | -0.063                     | 232.8469  |
| 30   | 21     | 9      | 29    | 20      | 10      | A    | 0           | 418696.016   | -0.063                     | 232.8469  |
| 67   | 14     | 53     | 66    | 14      | 52      | E    | 0           | 418831.055   | 0.097                      | 574.9356  |
| 67   | 14     | 53     | 66    | 14      | 52      | A    | 0           | 418839.213   | -0.095                     | 574.9350  |
| 65   | 15     | 50     | 64    | 15      | 49      | E    | 0           | 418884.184   | 0.119                      | 552.8054  |
| 65   | 15     | 50     | 64    | 15      | 49      | A    | 0           | 418902.149   | 0.072                      | 552.8027  |
| 42   | 15     | 28     | 41    | 14      | 27      | A    | 0           | 418941.618   | -0.072                     | 283.4200  |



| $J'$ | $K'_a$ | $K'_c$ | $J''$ | $K''_a$ | $K''_c$ | Sym. | $v_{tCH_3}$ | $\nu_{Obs.}$ | $\nu_{Obs.} - \nu_{Calc.}$ | $E_{low}$ |
|------|--------|--------|-------|---------|---------|------|-------------|--------------|----------------------------|-----------|
| 42   | 15     | 27     | 41    | 14      | 27      | E    | 0           | 418988.677   | -0.040                     | 283.4249  |
| 42   | 15     | 28     | 41    | 14      | 28      | E    | 0           | 419026.597   | -0.025                     | 283.4109  |
| 66   | 16     | 51     | 65    | 16      | 50      | E    | 0           | 419121.882   | -0.182                     | 567.1362  |
| 66   | 16     | 51     | 65    | 16      | 50      | A    | 0           | 419126.933   | -0.074                     | 567.1354  |
| 67   | 27     | 41     | 66    | 27      | 40      | A    | 0           | 419148.761   | -0.061                     | 662.8633  |
| 67   | 27     | 40     | 66    | 27      | 39      | A    | 0           | 419148.761   | -0.061                     | 662.8633  |
| 67   | 27     | 41     | 66    | 27      | 40      | E    | 0           | 419151.431   | 0.082                      | 662.8522  |
| 67   | 27     | 40     | 66    | 27      | 39      | E    | 0           | 419153.422   | 0.075                      | 662.8538  |
| 42   | 15     | 27     | 41    | 14      | 28      | A    | 0           | 419160.978   | -0.020                     | 283.4139  |
| 32   | 20     | 12     | 31    | 19      | 12      | E    | 0           | 419422.882   | -0.037                     | 238.0190  |
| 32   | 20     | 13     | 31    | 19      | 13      | E    | 0           | 419452.062   | -0.004                     | 238.0078  |
| 66   | 21     | 46     | 65    | 21      | 45      | A    | 0           | 419453.689   | 0.019                      | 597.3874  |
| 32   | 20     | 12     | 31    | 19      | 13      | A    | 0           | 419469.702   | -0.073                     | 238.0201  |
| 32   | 20     | 13     | 31    | 19      | 12      | A    | 0           | 419469.702   | -0.073                     | 238.0201  |
| 66   | 21     | 46     | 65    | 21      | 45      | E    | 0           | 419482.731   | -0.068                     | 597.3791  |
| 66   | 21     | 45     | 65    | 21      | 44      | E    | 0           | 419513.052   | 0.050                      | 597.3884  |
| 66   | 21     | 45     | 65    | 21      | 44      | A    | 0           | 419525.945   | -0.155                     | 597.3905  |
| 67   | 15     | 52     | 66    | 16      | 51      | A    | 0           | 419538.630   | -0.069                     | 581.1160  |
| 67   | 15     | 53     | 66    | 14      | 52      | E    | 0           | 419549.397   | -0.008                     | 574.9356  |
| 67   | 15     | 52     | 66    | 16      | 51      | E    | 0           | 419551.907   | -0.002                     | 581.1166  |
| 67   | 15     | 53     | 66    | 14      | 52      | A    | 0           | 419561.145   | -0.012                     | 574.9350  |
| 67   | 26     | 41     | 66    | 26      | 40      | A    | 0           | 419927.203   | -0.056                     | 653.1501  |
| 67   | 26     | 42     | 66    | 26      | 41      | A    | 0           | 419927.203   | -0.055                     | 653.1501  |
| 67   | 26     | 42     | 66    | 26      | 41      | E    | 0           | 419930.421   | -0.069                     | 653.1388  |
| 67   | 26     | 41     | 66    | 26      | 40      | E    | 0           | 419932.096   | -0.110                     | 653.1418  |
| 68   | 41     | 28     | 67    | 41      | 27      | E    | 0           | 420073.366   | -0.196                     | 855.3557  |
| 68   | 41     | 28     | 67    | 41      | 27      | A    | 0           | 420074.934   | 0.048                      | 855.3493  |
| 68   | 41     | 27     | 67    | 41      | 26      | A    | 0           | 420074.934   | 0.048                      | 855.3493  |
| 68   | 41     | 27     | 67    | 41      | 26      | E    | 0           | 420074.934   | -0.136                     | 855.3426  |
| 34   | 19     | 15     | 33    | 18      | 15      | E    | 0           | 420098.091   | -0.051                     | 244.4510  |
| 34   | 19     | 16     | 33    | 18      | 16      | E    | 0           | 420122.416   | -0.007                     | 244.4390  |
| 34   | 19     | 16     | 33    | 18      | 15      | A    | 0           | 420145.380   | -0.054                     | 244.4504  |
| 34   | 19     | 15     | 33    | 18      | 16      | A    | 0           | 420145.380   | -0.054                     | 244.4504  |
| 40   | 16     | 24     | 39    | 15      | 24      | E    | 0           | 420446.819   | -0.094                     | 271.5797  |
| 40   | 16     | 25     | 39    | 15      | 25      | E    | 0           | 420452.458   | -0.015                     | 271.5668  |
| 40   | 16     | 25     | 39    | 15      | 24      | A    | 0           | 420488.851   | -0.141                     | 271.5742  |
| 40   | 16     | 24     | 39    | 15      | 25      | A    | 0           | 420493.604   | -0.007                     | 271.5740  |
| 36   | 18     | 18     | 35    | 17      | 18      | E    | 0           | 420601.022   | -0.064                     | 252.1629  |
| 36   | 18     | 19     | 35    | 17      | 19      | E    | 0           | 420619.907   | -0.011                     | 252.1503  |
| 36   | 18     | 18     | 35    | 17      | 19      | A    | 0           | 420648.067   | -0.059                     | 252.1607  |
| 36   | 18     | 19     | 35    | 17      | 18      | A    | 0           | 420648.067   | -0.059                     | 252.1607  |
| 38   | 17     | 21     | 37    | 16      | 21      | E    | 0           | 420799.982   | -0.040                     | 261.1885  |
| 38   | 17     | 22     | 37    | 16      | 22      | E    | 0           | 420812.673   | -0.038                     | 261.1755  |
| 67   | 25     | 43     | 66    | 25      | 42      | A    | 0           | 420822.953   | -0.022                     | 643.8707  |
| 67   | 25     | 43     | 66    | 25      | 42      | E    | 0           | 420826.951   | -0.078                     | 643.8592  |
| 38   | 17     | 22     | 37    | 16      | 21      | A    | 0           | 420846.049   | -0.024                     | 261.1845  |
| 66   | 20     | 47     | 65    | 20      | 46      | A    | 0           | 421505.146   | -0.111                     | 590.4740  |
| 66   | 20     | 47     | 65    | 20      | 46      | E    | 0           | 421524.838   | -0.032                     | 590.4694  |
| 67   | 24     | 44     | 66    | 24      | 43      | A    | 0           | 421866.774   | -0.006                     | 635.0360  |
| 70   | 12     | 58     | 69    | 13      | 57      | A    | 0           | 421953.245   | -0.230                     | 602.5066  |
| 70   | 13     | 58     | 69    | 13      | 57      | A    | 0           | 421954.956   | -0.166                     | 602.5066  |
| 70   | 12     | 58     | 69    | 12      | 57      | A    | 0           | 421956.468   | 0.054                      | 602.5065  |
| 70   | 13     | 58     | 69    | 12      | 57      | A    | 0           | 421958.046   | -0.015                     | 602.5065  |
| 66   | 20     | 46     | 65    | 20      | 45      | A    | 0           | 422002.782   | -0.104                     | 590.4978  |
| 69   | 13     | 56     | 68    | 14      | 55      | A    | 1           | 422160.479   | 0.435                      | 724.2545  |
| 25   | 24     | 1      | 24    | 23      | 2       | A    | 0           | 422290.507   | -0.063                     | 229.6545  |
| 25   | 24     | 2      | 24    | 23      | 1       | A    | 0           | 422290.507   | -0.063                     | 229.6545  |
| 25   | 24     | 2      | 24    | 23      | 2       | E    | 0           | 422294.907   | 0.048                      | 229.6407  |
| 69   | 13     | 56     | 68    | 14      | 55      | E    | 1           | 422334.017   | 0.070                      | 724.2591  |
| 69   | 13     | 56     | 68    | 14      | 55      | E    | 0           | 422440.849   | 0.099                      | 596.0416  |
| 69   | 13     | 56     | 68    | 14      | 55      | A    | 0           | 422446.017   | -0.157                     | 596.0418  |
| 66   | 15     | 51     | 65    | 15      | 50      | E    | 0           | 422696.280   | 0.022                      | 566.7779  |
| 66   | 15     | 51     | 65    | 15      | 50      | A    | 0           | 422712.349   | 0.002                      | 566.7758  |
| 68   | 14     | 54     | 67    | 15      | 53      | E    | 0           | 422896.656   | 0.001                      | 588.9303  |
| 68   | 14     | 54     | 67    | 15      | 53      | A    | 0           | 422900.892   | 0.078                      | 588.9301  |
| 67   | 23     | 44     | 66    | 23      | 43      | E    | 0           | 423109.974   | 0.074                      | 626.6570  |
| 27   | 23     | 4      | 26    | 22      | 4       | E    | 0           | 423112.868   | -0.033                     | 231.5459  |
| 27   | 23     | 5      | 26    | 22      | 5       | E    | 0           | 423153.073   | -0.246                     | 231.5380  |
| 27   | 23     | 5      | 26    | 22      | 4       | A    | 0           | 423154.608   | 0.032                      | 231.5517  |
| 27   | 23     | 4      | 26    | 22      | 5       | A    | 0           | 423154.608   | 0.032                      | 231.5517  |
| 68   | 31     | 38     | 67    | 31      | 37      | E    | 0           | 423262.128   | -0.287                     | 719.7956  |
| 66   | 17     | 50     | 65    | 17      | 49      | A    | 0           | 423331.905   | -0.105                     | 572.7320  |
| 66   | 17     | 50     | 65    | 17      | 49      | E    | 0           | 423331.905   | 0.115                      | 572.7326  |
| 70   | 38     | 32     | 70    | 37      | 34      | E    | 0           | 423391.062   | -0.248                     | 839.1609  |
| 70   | 38     | 33     | 70    | 37      | 33      | E    | 0           | 423412.335   | 0.015                      | 839.1721  |
| 68   | 14     | 54     | 67    | 14      | 53      | E    | 0           | 423615.137   | 0.036                      | 588.9063  |
| 68   | 14     | 54     | 67    | 14      | 53      | A    | 0           | 423622.659   | -0.004                     | 588.9060  |
| 66   | 19     | 48     | 65    | 19      | 47      | A    | 0           | 423625.676   | -0.074                     | 584.1171  |
| 66   | 19     | 48     | 65    | 19      | 47      | E    | 0           | 423636.365   | 0.151                      | 584.1149  |
| 69   | 38     | 31     | 69    | 37      | 32      | A    | 0           | 423662.440   | -0.034                     | 824.7045  |
| 69   | 38     | 32     | 69    | 37      | 33      | A    | 0           | 423662.440   | -0.034                     | 824.7045  |
| 69   | 38     | 32     | 69    | 37      | 32      | E    | 0           | 423708.123   | 0.104                      | 824.7049  |
| 29   | 22     | 7      | 28    | 21      | 7       | E    | 0           | 423959.145   | -0.025                     | 234.6682  |
| 29   | 22     | 8      | 28    | 21      | 8       | E    | 0           | 423996.379   | 0.015                      | 234.6591  |
| 29   | 22     | 7      | 28    | 21      | 8       | A    | 0           | 424003.116   | -0.071                     | 234.6725  |
| 29   | 22     | 8      | 28    | 21      | 7       | A    | 0           | 424003.116   | -0.071                     | 234.6725  |
| 68   | 15     | 54     | 67    | 14      | 53      | E    | 0           | 424053.523   | -0.036                     | 588.9063  |
| 68   | 15     | 54     | 67    | 14      | 53      | A    | 0           | 424063.310   | 0.039                      | 588.9060  |
| 45   | 14     | 31     | 44    | 13      | 32      | A    | 0           | 424108.782   | -0.073                     | 306.1890  |
| 67   | 38     | 29     | 67    | 37      | 30      | A    | 0           | 424216.397   | 0.026                      | 796.4040  |
| 67   | 38     | 30     | 67    | 37      | 31      | A    | 0           | 424216.397   | 0.026                      | 796.4040  |
| 43   | 15     | 29     | 42    | 14      | 28      | A    | 0           | 424221.849   | -0.056                     | 292.2974  |
| 67   | 16     | 52     | 66    | 16      | 51      | E    | 0           | 424243.315   | -0.094                     | 581.1166  |
| 67   | 16     | 52     | 66    | 16      | 51      | A    | 0           | 424248.770   | -0.166                     | 581.1160  |
| 43   | 15     | 28     | 42    | 14      | 28      | E    | 0           | 424321.524   | -0.013                     | 292.3013  |
| 68   | 29     | 40     | 67    | 29      | 39      | A    | 0           | 424334.920   | -0.093                     | 697.4959  |
| 68   | 29     | 39     | 67    | 29      | 38      | A    | 0           | 424334.920   | -0.093                     | 697.4959  |
| 68   | 29     | 39     | 67    | 29      | 38      | E    | 0           | 424336.507   | 0.023                      | 697.4862  |
| 68   | 29     | 40     | 67    | 29      | 39      | E    | 0           | 424338.309   | -0.606                     | 697.4848  |
| 43   | 15     | 29     | 42    | 14      | 29      | E    | 0           | 424446.526   | 0.086                      | 292.2843  |
| 64   | 17     | 47     | 63    | 17      | 46      | A    | 0           | 424454.188   | -0.035                     | 546.3867  |
| 64   | 17     | 47     | 63    | 17      | 46      | E    | 0           | 424470.459   | -0.033                     | 546.3899  |
| 66   | 38     | 29     | 66    | 37      | 29      | E    | 0           | 424521.523   | 0.093                      | 782.5708  |
| 67   | 22     | 46     | 66    | 22      | 45      | A    | 0           | 424594.092   | 0.115                      | 618.7660  |
| 43   | 15     | 28     | 42    | 14      | 29      | A    | 0           | 424634.376   | -0.085                     | 292.2859  |
| 65   | 38     | 27     | 65    | 37      | 28      | A    | 0           | 424723.223   | -0.080                     | 768.9473  |
| 65   | 38     | 28     | 65    | 37      | 29      | A    | 0           | 424723.223   | -0.080                     | 768.9473  |
| 31   | 21     | 10     | 30    | 20      | 10      | E    | 0           | 424772.602   | -0.030                     | 239.0232  |
| 31   | 21     | 11     | 30    | 20      | 11      | E    | 0           | 424806.039   | 0.008                      | 239.0130  |
| 31   | 21     | 11     | 30    | 20      | 10      | A    | 0           | 424818.328   | -0.056                     | 239.0260  |
| 31   | 21     | 10     | 30    | 20      | 11      | A    | 0           | 424818.328   | -0.056                     | 239.0260  |
| 64   | 16     | 48     | 63    | 16      | 47      | E    | 0           | 424942.016   | -0.007                     | 542.8194  |
| 64   | 16     | 48     | 63    | 16      | 47      | A    | 0           | 424949.412   | 0.084                      | 542.8147  |
| 64   | 38     | 26     | 64    | 37      | 27      | A    | 0           | 424960.050   | -0.065                     | 755.5349  |
| 64   | 38     | 27     | 64    | 37      | 28      | A    | 0           | 424960.050   | -0.065                     | 755.5349  |
| 68   | 28     | 40     | 67    | 28      | 39      | A    | 0           | 424971.490   | -0.024                     | 686.9599  |



| $J'$ | $K'_a$ | $K'_c$ | $J''$ | $K''_a$ | $K''_c$ | Sym. | $v_{tCH_3}$ | $\nu_{Obs.}$ | $\nu_{Obs.} - \nu_{Calc.}$ | $E_{low}$ |
|------|--------|--------|-------|---------|---------|------|-------------|--------------|----------------------------|-----------|
| 68   | 28     | 41     | 67    | 28      | 40      | A    | 0           | 424971.490   | -0.024                     | 686.9599  |
| 68   | 28     | 41     | 67    | 28      | 40      | E    | 0           | 424973.573   | 0.026                      | 686.9494  |
| 68   | 28     | 40     | 67    | 28      | 39      | E    | 0           | 424975.772   | -0.057                     | 686.9496  |
| 64   | 38     | 26     | 64    | 37      | 28      | E    | 0           | 424985.877   | -0.200                     | 755.5239  |
| 64   | 38     | 27     | 64    | 37      | 27      | E    | 0           | 425006.267   | 0.026                      | 755.5355  |
| 65   | 18     | 47     | 64    | 18      | 46      | E    | 0           | 425200.256   | -0.008                     | 564.8258  |
| 62   | 38     | 24     | 62    | 37      | 25      | A    | 0           | 425402.237   | -0.022                     | 729.3409  |
| 62   | 38     | 25     | 62    | 37      | 26      | A    | 0           | 425402.237   | -0.022                     | 729.3409  |
| 62   | 38     | 24     | 62    | 37      | 26      | E    | 0           | 425428.605   | -0.045                     | 729.3298  |
| 62   | 38     | 25     | 62    | 37      | 25      | E    | 0           | 425448.422   | -0.145                     | 729.3415  |
| 33   | 20     | 13     | 32    | 19      | 13      | E    | 0           | 425523.512   | 0.029                      | 244.6233  |
| 33   | 20     | 14     | 32    | 19      | 14      | E    | 0           | 425552.367   | -0.162                     | 244.6121  |
| 33   | 20     | 13     | 32    | 19      | 14      | A    | 0           | 425570.266   | -0.063                     | 244.6244  |
| 33   | 20     | 14     | 32    | 19      | 13      | A    | 0           | 425570.266   | -0.063                     | 244.6244  |
| 61   | 38     | 23     | 61    | 37      | 24      | A    | 0           | 425608.039   | -0.256                     | 716.5589  |
| 61   | 38     | 24     | 61    | 37      | 25      | A    | 0           | 425608.039   | -0.256                     | 716.5589  |
| 61   | 38     | 23     | 61    | 37      | 25      | E    | 0           | 425634.758   | -0.125                     | 716.5478  |
| 61   | 38     | 24     | 61    | 37      | 24      | E    | 0           | 425654.689   | 0.006                      | 716.5596  |
| 68   | 27     | 42     | 67    | 27      | 41      | A    | 0           | 425691.347   | 0.064                      | 676.8446  |
| 68   | 27     | 41     | 67    | 27      | 40      | A    | 0           | 425691.347   | 0.063                      | 676.8446  |
| 68   | 27     | 42     | 67    | 27      | 41      | E    | 0           | 425693.458   | -0.503                     | 676.8336  |
| 68   | 27     | 41     | 67    | 27      | 40      | E    | 0           | 425695.964   | -0.061                     | 676.8353  |
| 60   | 38     | 22     | 60    | 37      | 23      | A    | 0           | 425804.696   | -0.061                     | 703.9867  |
| 60   | 38     | 23     | 60    | 37      | 24      | A    | 0           | 425804.696   | -0.061                     | 703.9867  |
| 60   | 38     | 22     | 60    | 37      | 24      | E    | 0           | 425831.344   | -0.190                     | 703.9756  |
| 60   | 38     | 23     | 60    | 37      | 23      | E    | 0           | 425851.201   | -0.019                     | 703.9874  |
| 59   | 38     | 21     | 59    | 37      | 22      | A    | 0           | 425991.724   | -0.252                     | 691.6241  |
| 59   | 38     | 22     | 59    | 37      | 23      | A    | 0           | 425991.724   | -0.252                     | 691.6241  |
| 59   | 38     | 21     | 59    | 37      | 23      | E    | 0           | 426018.742   | -0.189                     | 691.6130  |
| 59   | 38     | 22     | 59    | 37      | 22      | E    | 0           | 426038.570   | 0.061                      | 691.6248  |
| 35   | 19     | 16     | 34    | 18      | 16      | E    | 0           | 426162.126   | -0.056                     | 251.4858  |
| 58   | 38     | 20     | 58    | 37      | 21      | A    | 0           | 426170.171   | -0.101                     | 679.4710  |
| 58   | 38     | 21     | 58    | 37      | 22      | A    | 0           | 426170.171   | -0.101                     | 679.4710  |
| 41   | 16     | 25     | 40    | 15      | 25      | E    | 0           | 426172.467   | -0.035                     | 279.9645  |
| 41   | 16     | 26     | 40    | 15      | 26      | E    | 0           | 426177.474   | -0.045                     | 279.9516  |
| 35   | 19     | 17     | 34    | 18      | 17      | E    | 0           | 426186.312   | 0.003                      | 251.4738  |
| 58   | 38     | 20     | 58    | 37      | 22      | E    | 0           | 426197.274   | -0.121                     | 679.4598  |
| 35   | 19     | 17     | 34    | 18      | 16      | A    | 0           | 426209.391   | -0.064                     | 251.4852  |
| 35   | 19     | 16     | 34    | 18      | 17      | A    | 0           | 426209.391   | -0.064                     | 251.4852  |
| 41   | 16     | 26     | 40    | 15      | 25      | A    | 0           | 426211.863   | -0.105                     | 279.9589  |
| 58   | 38     | 21     | 58    | 37      | 21      | E    | 0           | 426216.792   | -0.076                     | 679.4717  |
| 41   | 16     | 25     | 40    | 15      | 26      | A    | 0           | 426221.769   | 0.019                      | 279.9586  |
| 68   | 15     | 53     | 67    | 16      | 52      | E    | 0           | 426267.728   | -0.022                     | 595.2679  |
| 66   | 19     | 47     | 65    | 19      | 46      | A    | 0           | 426297.952   | -0.117                     | 584.2700  |
| 66   | 19     | 47     | 65    | 19      | 46      | E    | 0           | 426312.663   | 0.058                      | 584.2686  |
| 57   | 38     | 19     | 57    | 37      | 20      | A    | 0           | 426339.923   | -0.035                     | 667.5271  |
| 57   | 38     | 20     | 57    | 37      | 21      | A    | 0           | 426339.923   | -0.035                     | 667.5271  |
| 57   | 38     | 19     | 57    | 37      | 21      | E    | 0           | 426367.192   | -0.048                     | 667.5159  |
| 57   | 38     | 20     | 57    | 37      | 20      | E    | 0           | 426386.602   | -0.010                     | 667.5278  |
| 67   | 21     | 47     | 66    | 21      | 46      | E    | 0           | 426447.599   | 0.067                      | 611.3716  |
| 56   | 38     | 18     | 56    | 37      | 19      | A    | 0           | 426501.244   | -0.092                     | 655.7923  |
| 56   | 38     | 19     | 56    | 37      | 20      | A    | 0           | 426501.244   | -0.092                     | 655.7923  |
| 68   | 26     | 42     | 67    | 26      | 41      | A    | 0           | 426512.333   | -0.151                     | 667.1574  |
| 68   | 26     | 43     | 67    | 26      | 42      | A    | 0           | 426512.333   | -0.149                     | 667.1574  |
| 68   | 26     | 43     | 67    | 26      | 42      | E    | 0           | 426515.872   | -0.031                     | 667.1461  |
| 68   | 26     | 42     | 67    | 26      | 41      | E    | 0           | 426517.625   | -0.041                     | 667.1493  |
| 67   | 21     | 46     | 66    | 21      | 45      | A    | 0           | 426541.594   | -0.010                     | 611.3844  |
| 56   | 38     | 19     | 56    | 37      | 19      | E    | 0           | 426547.980   | -0.063                     | 655.7930  |
| 37   | 18     | 19     | 36    | 17      | 19      | E    | 0           | 426604.674   | -0.054                     | 259.6356  |
| 37   | 18     | 20     | 36    | 17      | 20      | E    | 0           | 426623.307   | -0.021                     | 259.6230  |
| 37   | 18     | 19     | 36    | 17      | 20      | A    | 0           | 426651.713   | -0.025                     | 259.6333  |
| 37   | 18     | 20     | 36    | 17      | 19      | A    | 0           | 426651.713   | -0.024                     | 259.6333  |
| 39   | 17     | 22     | 38    | 16      | 22      | E    | 0           | 426702.415   | -0.232                     | 269.1094  |
| 39   | 17     | 23     | 38    | 16      | 23      | E    | 0           | 426714.943   | -0.028                     | 269.0965  |
| 39   | 17     | 23     | 38    | 16      | 22      | A    | 0           | 426748.626   | 0.013                      | 269.1054  |
| 54   | 38     | 16     | 54    | 37      | 17      | A    | 0           | 426800.290   | -0.066                     | 632.9492  |
| 54   | 38     | 17     | 54    | 37      | 18      | A    | 0           | 426800.290   | -0.066                     | 632.9492  |
| 53   | 38     | 15     | 53    | 37      | 16      | A    | 0           | 426938.547   | -0.021                     | 621.8406  |
| 53   | 38     | 16     | 53    | 37      | 17      | A    | 0           | 426938.547   | -0.021                     | 621.8406  |
| 53   | 38     | 15     | 53    | 37      | 17      | E    | 0           | 426966.337   | -0.065                     | 621.8293  |
| 53   | 38     | 16     | 53    | 37      | 16      | E    | 0           | 426985.429   | 0.023                      | 621.8414  |
| 51   | 38     | 13     | 51    | 37      | 14      | A    | 0           | 427193.618   | -0.158                     | 600.2485  |
| 51   | 38     | 14     | 51    | 37      | 15      | A    | 0           | 427193.618   | -0.158                     | 600.2485  |
| 51   | 38     | 14     | 51    | 37      | 14      | E    | 0           | 427240.558   | -0.121                     | 600.2494  |
| 50   | 38     | 12     | 50    | 37      | 13      | A    | 0           | 427311.201   | -0.101                     | 589.7648  |
| 50   | 38     | 13     | 50    | 37      | 14      | A    | 0           | 427311.201   | -0.101                     | 589.7648  |
| 50   | 38     | 12     | 50    | 37      | 14      | E    | 0           | 427339.447   | -0.020                     | 589.7535  |
| 49   | 38     | 11     | 49    | 37      | 12      | A    | 0           | 427422.385   | -0.067                     | 579.4890  |
| 49   | 38     | 12     | 49    | 37      | 13      | A    | 0           | 427422.385   | -0.067                     | 579.4890  |
| 49   | 38     | 11     | 49    | 37      | 13      | E    | 0           | 427450.551   | -0.163                     | 579.4777  |
| 70   | 14     | 57     | 69    | 13      | 56      | A    | 0           | 427511.719   | -0.069                     | 610.1330  |
| 48   | 38     | 10     | 48    | 37      | 11      | A    | 0           | 427527.467   | -0.009                     | 569.4211  |
| 48   | 38     | 11     | 48    | 37      | 12      | A    | 0           | 427527.467   | -0.009                     | 569.4211  |
| 48   | 38     | 11     | 48    | 37      | 11      | E    | 0           | 427574.342   | -0.108                     | 569.4220  |
| 47   | 38     | 9      | 47    | 37      | 10      | A    | 0           | 427626.579   | -0.039                     | 559.5608  |
| 47   | 38     | 10     | 47    | 37      | 11      | A    | 0           | 427626.579   | -0.039                     | 559.5608  |
| 47   | 38     | 9      | 47    | 37      | 11      | E    | 0           | 427655.001   | -0.052                     | 559.5495  |
| 46   | 38     | 8      | 46    | 37      | 9       | A    | 0           | 427720.112   | -0.002                     | 549.9081  |
| 46   | 38     | 9      | 46    | 37      | 10      | A    | 0           | 427720.112   | -0.002                     | 549.9081  |
| 46   | 38     | 8      | 46    | 37      | 10      | E    | 0           | 427748.521   | -0.105                     | 549.8968  |
| 45   | 38     | 7      | 45    | 37      | 8       | A    | 0           | 427808.385   | 0.190                      | 540.4628  |
| 45   | 38     | 8      | 45    | 37      | 9       | A    | 0           | 427808.385   | 0.190                      | 540.4628  |
| 69   | 15     | 55     | 68    | 15      | 54      | E    | 0           | 428285.358   | -0.262                     | 603.0512  |
| 69   | 15     | 55     | 68    | 15      | 54      | A    | 0           | 428291.654   | -0.098                     | 603.0512  |
| 26   | 24     | 2      | 25    | 23      | 2       | E    | 0           | 428394.487   | -0.041                     | 234.7776  |
| 26   | 24     | 2      | 25    | 23      | 3       | A    | 0           | 428433.224   | -0.073                     | 234.7849  |
| 26   | 24     | 3      | 25    | 23      | 2       | A    | 0           | 428433.224   | -0.073                     | 234.7849  |
| 26   | 24     | 3      | 25    | 23      | 3       | E    | 0           | 428437.612   | 0.050                      | 234.7711  |
| 69   | 14     | 55     | 68    | 14      | 54      | A    | 0           | 428465.863   | -0.146                     | 603.0365  |
| 67   | 20     | 48     | 66    | 20      | 47      | A    | 0           | 428564.354   | -0.126                     | 604.5339  |
| 67   | 20     | 48     | 66    | 20      | 47      | E    | 0           | 428580.052   | 0.062                      | 604.5300  |
| 69   | 15     | 55     | 68    | 14      | 54      | E    | 0           | 428724.080   | 0.000                      | 603.0366  |
| 69   | 15     | 55     | 68    | 14      | 54      | A    | 0           | 428732.376   | 0.015                      | 603.0365  |
| 69   | 33     | 37     | 68    | 33      | 36      | A    | 0           | 428776.467   | -0.072                     | 757.8341  |
| 69   | 33     | 36     | 68    | 33      | 35      | A    | 0           | 428776.467   | -0.072                     | 757.8341  |
| 69   | 33     | 36     | 68    | 33      | 35      | E    | 0           | 428776.467   | 0.062                      | 757.8287  |
| 69   | 33     | 37     | 68    | 33      | 36      | E    | 0           | 428778.907   | -0.142                     | 757.8217  |
| 69   | 16     | 53     | 68    | 17      | 52      | A    | 0           | 428916.986   | 0.174                      | 615.6563  |
| 69   | 16     | 53     | 68    | 17      | 52      | E    | 0           | 428951.513   | -0.018                     | 615.6567  |
| 67   | 17     | 51     | 66    | 17      | 50      | E    | 0           | 429004.953   | -0.027                     | 586.8534  |
| 67   | 17     | 51     | 66    | 17      | 50      | A    | 0           | 429006.607   | 0.035                      | 586.8529  |
| 44   | 15     | 30     | 43    | 14      | 29      | E    | 0           | 429086.724   | 0.131                      | 301.4096  |
| 28   | 23     | 5      | 27    | 22      | 5       | E    | 0           | 429252.156   | -0.030                     | 237.0929  |
| 68   | 16     | 53     | 67    | 16      | 52      | E    | 0           | 429287.060   | -0.071                     | 595.2679  |
| 28   | 23     | 6      | 27    | 22      | 6       | E    | 0           | 429292.376   | -0.197                     | 237.0850  |
| 28   | 23     | 6      | 27    | 22      | 5       | A    | 0           | 429293.879   | 0.014                      | 237.0987  |



| $J'$ | $K'_a$ | $K'_c$ | $J''$ | $K''_a$ | $K''_c$ | Sym. | $v_{tCH_3}$ | $\nu_{Obs.}$ | $\nu_{Obs.} - \nu_{Calc.}$ | $E_{low}$ |
|------|--------|--------|-------|---------|---------|------|-------------|--------------|----------------------------|-----------|
| 28   | 23     | 5      | 27    | 22      | 6       | A    | 0           | 429293.879   | 0.014                      | 237.0987  |
| 44   | 15     | 30     | 43    | 14      | 29      | A    | 0           | 429314.860   | -0.046                     | 301.4066  |
| 67   | 20     | 47     | 66    | 20      | 46      | A    | 0           | 429371.573   | -0.007                     | 604.5743  |
| 67   | 20     | 47     | 66    | 20      | 46      | E    | 0           | 429376.973   | -0.022                     | 604.5716  |
| 44   | 15     | 29     | 43    | 14      | 29      | E    | 0           | 429481.968   | -0.163                     | 301.4096  |
| 65   | 16     | 50     | 64    | 15      | 49      | E    | 0           | 429627.421   | -0.052                     | 552.8054  |
| 65   | 16     | 49     | 64    | 16      | 48      | E    | 0           | 429785.889   | -0.090                     | 556.9939  |
| 65   | 16     | 49     | 64    | 16      | 48      | A    | 0           | 429798.835   | -0.028                     | 556.9895  |
| 44   | 15     | 30     | 43    | 14      | 30      | E    | 0           | 429815.751   | 0.011                      | 301.3852  |
| 66   | 16     | 51     | 65    | 15      | 50      | E    | 0           | 429865.446   | -0.026                     | 566.7779  |
| 68   | 23     | 46     | 67    | 23      | 45      | A    | 0           | 429882.407   | 0.111                      | 640.7742  |
| 68   | 23     | 46     | 67    | 23      | 45      | E    | 0           | 429890.508   | 0.082                      | 640.7635  |
| 66   | 16     | 51     | 65    | 15      | 50      | A    | 0           | 429908.603   | -0.136                     | 566.7758  |
| 44   | 15     | 29     | 43    | 14      | 30      | A    | 0           | 430072.414   | -0.204                     | 301.3856  |
| 30   | 22     | 8      | 29    | 21      | 8       | E    | 0           | 430090.711   | 0.011                      | 240.6343  |
| 30   | 22     | 9      | 29    | 21      | 9       | E    | 0           | 430127.856   | 0.011                      | 240.6251  |
| 30   | 22     | 8      | 29    | 21      | 9       | A    | 0           | 430134.651   | -0.068                     | 240.6386  |
| 30   | 22     | 9      | 29    | 21      | 8       | A    | 0           | 430134.651   | -0.068                     | 240.6386  |
| 67   | 19     | 49     | 66    | 19      | 48      | E    | 0           | 430599.255   | -0.007                     | 598.2459  |
| 69   | 29     | 41     | 68    | 29      | 40      | A    | 0           | 430822.130   | 0.035                      | 711.6502  |
| 69   | 29     | 40     | 68    | 29      | 39      | A    | 0           | 430822.130   | 0.035                      | 711.6502  |
| 69   | 29     | 40     | 68    | 29      | 39      | E    | 0           | 430823.687   | 0.027                      | 711.6405  |
| 69   | 29     | 41     | 68    | 29      | 40      | E    | 0           | 430826.180   | -0.005                     | 711.6392  |
| 32   | 21     | 11     | 31    | 20      | 11      | E    | 0           | 430889.664   | -0.052                     | 245.4116  |
| 32   | 21     | 12     | 31    | 20      | 12      | E    | 0           | 430923.046   | 0.007                      | 245.4013  |
| 32   | 21     | 12     | 31    | 20      | 11      | A    | 0           | 430935.395   | -0.069                     | 245.4143  |
| 32   | 21     | 11     | 31    | 20      | 12      | A    | 0           | 430935.395   | -0.069                     | 245.4143  |
| 68   | 15     | 53     | 67    | 15      | 52      | E    | 0           | 430959.226   | -0.024                     | 595.1114  |
| 68   | 15     | 53     | 67    | 15      | 52      | A    | 0           | 430971.223   | -0.041                     | 595.1103  |
| 46   | 14     | 32     | 45    | 13      | 33      | E    | 0           | 431050.500   | -0.071                     | 315.7910  |
| 46   | 14     | 32     | 45    | 13      | 33      | A    | 0           | 431069.386   | -0.075                     | 315.7879  |
| 67   | 18     | 50     | 66    | 18      | 49      | A    | 0           | 431192.015   | 0.032                      | 592.4413  |
| 67   | 18     | 50     | 66    | 18      | 49      | E    | 0           | 431196.543   | 0.065                      | 592.4410  |
| 67   | 16     | 52     | 66    | 15      | 51      | E    | 0           | 431412.654   | 0.030                      | 580.8775  |
| 68   | 22     | 47     | 67    | 22      | 46      | A    | 0           | 431476.102   | 0.116                      | 632.9289  |
| 69   | 28     | 41     | 68    | 28      | 40      | A    | 0           | 431491.348   | 0.046                      | 701.1354  |
| 69   | 28     | 42     | 68    | 28      | 41      | A    | 0           | 431491.348   | 0.046                      | 701.1354  |
| 69   | 28     | 42     | 68    | 28      | 41      | E    | 0           | 431493.642   | 0.182                      | 701.1250  |
| 68   | 22     | 46     | 67    | 22      | 45      | E    | 0           | 431500.371   | -0.019                     | 632.9275  |
| 68   | 22     | 46     | 67    | 22      | 45      | A    | 0           | 431504.551   | 0.009                      | 632.9301  |
| 34   | 20     | 14     | 33    | 19      | 14      | E    | 0           | 431615.725   | -0.029                     | 251.4382  |
| 34   | 20     | 15     | 33    | 19      | 15      | E    | 0           | 431644.685   | -0.001                     | 251.4270  |
| 34   | 20     | 14     | 33    | 19      | 15      | A    | 0           | 431662.526   | -0.063                     | 251.4392  |
| 34   | 20     | 15     | 33    | 19      | 14      | A    | 0           | 431662.526   | -0.063                     | 251.4392  |
| 42   | 16     | 26     | 41    | 15      | 26      | E    | 0           | 431843.638   | -0.012                     | 288.5711  |
| 42   | 16     | 27     | 41    | 15      | 27      | E    | 0           | 431848.250   | -0.024                     | 288.5583  |
| 42   | 16     | 27     | 41    | 15      | 26      | A    | 0           | 431877.876   | -0.110                     | 288.5656  |
| 42   | 16     | 26     | 41    | 15      | 27      | A    | 0           | 431898.175   | -0.014                     | 288.5650  |
| 36   | 19     | 17     | 35    | 18      | 17      | E    | 0           | 432213.324   | -0.035                     | 258.7329  |
| 36   | 19     | 18     | 35    | 18      | 18      | E    | 0           | 432237.330   | 0.012                      | 258.7209  |
| 69   | 27     | 43     | 68    | 27      | 42      | A    | 0           | 432249.123   | -0.054                     | 691.0441  |
| 69   | 27     | 42     | 68    | 27      | 41      | A    | 0           | 432249.123   | -0.055                     | 691.0441  |
| 36   | 19     | 18     | 35    | 18      | 17      | A    | 0           | 432260.593   | -0.019                     | 258.7323  |
| 36   | 19     | 17     | 35    | 18      | 18      | A    | 0           | 432260.593   | -0.019                     | 258.7323  |
| 69   | 15     | 54     | 68    | 16      | 53      | A    | 0           | 432359.938   | 0.199                      | 609.5871  |
| 69   | 15     | 54     | 68    | 16      | 53      | E    | 0           | 432361.969   | -0.022                     | 609.5874  |
| 65   | 17     | 48     | 64    | 17      | 47      | A    | 0           | 432397.537   | -0.403                     | 560.5450  |
| 40   | 17     | 23     | 39    | 16      | 23      | E    | 0           | 432573.447   | -0.056                     | 277.2477  |
| 40   | 17     | 24     | 39    | 16      | 24      | E    | 0           | 432585.365   | -0.056                     | 277.2349  |
| 38   | 18     | 20     | 37    | 17      | 20      | E    | 0           | 432588.341   | -0.083                     | 267.3227  |
| 38   | 18     | 21     | 37    | 17      | 21      | E    | 0           | 432606.786   | 0.020                      | 267.3102  |
| 38   | 18     | 20     | 37    | 17      | 21      | A    | 0           | 432635.363   | -0.039                     | 267.3204  |
| 38   | 18     | 21     | 37    | 17      | 20      | A    | 0           | 432635.363   | -0.037                     | 267.3204  |
| 70   | 14     | 56     | 69    | 15      | 55      | E    | 1           | 432963.984   | 0.267                      | 745.5388  |
| 69   | 26     | 43     | 68    | 26      | 42      | A    | 0           | 433115.516   | 0.034                      | 681.3843  |
| 70   | 15     | 56     | 69    | 15      | 55      | E    | 0           | 433241.017   | -0.035                     | 617.3373  |
| 70   | 15     | 56     | 69    | 15      | 55      | A    | 0           | 433246.830   | -0.146                     | 617.3375  |
| 70   | 14     | 56     | 69    | 14      | 55      | E    | 0           | 433347.223   | -0.088                     | 617.3285  |
| 70   | 14     | 56     | 69    | 14      | 55      | A    | 0           | 433353.669   | -0.077                     | 617.3286  |
| 68   | 21     | 48     | 67    | 21      | 47      | A    | 0           | 433418.548   | -0.047                     | 625.6026  |
| 68   | 21     | 48     | 67    | 21      | 47      | E    | 0           | 433445.851   | -0.001                     | 625.5963  |
| 70   | 15     | 56     | 69    | 14      | 55      | A    | 0           | 433513.279   | -0.048                     | 617.3286  |
| 68   | 21     | 47     | 67    | 21      | 46      | E    | 0           | 433621.515   | 0.075                      | 625.6093  |
| 68   | 21     | 47     | 67    | 21      | 46      | A    | 0           | 433630.383   | -0.143                     | 625.6123  |
| 25   | 25     | 0      | 24    | 24      | 0       | E    | 0           | 433673.170   | -0.043                     | 238.6034  |
| 25   | 25     | 1      | 24    | 24      | 0       | A    | 0           | 433708.459   | -0.094                     | 238.6120  |
| 25   | 25     | 0      | 24    | 24      | 1       | A    | 0           | 433708.459   | -0.094                     | 238.6120  |
| 25   | 25     | 1      | 24    | 24      | 1       | E    | 0           | 433718.286   | 0.017                      | 238.5984  |
| 45   | 15     | 31     | 44    | 14      | 30      | E    | 0           | 433973.065   | 0.175                      | 310.7536  |
| 68   | 16     | 53     | 67    | 15      | 52      | E    | 0           | 433978.550   | -0.081                     | 595.1114  |
| 68   | 16     | 53     | 67    | 15      | 52      | A    | 0           | 434003.269   | 0.000                      | 595.1103  |
| 66   | 18     | 48     | 65    | 18      | 47      | E    | 0           | 434084.162   | -0.198                     | 579.0090  |
| 69   | 25     | 45     | 68    | 25      | 44      | A    | 0           | 434116.989   | -0.015                     | 672.1663  |
| 45   | 15     | 31     | 44    | 14      | 30      | A    | 0           | 434148.447   | -0.108                     | 310.7511  |
| 69   | 16     | 54     | 68    | 16      | 53      | E    | 0           | 434277.110   | -0.299                     | 609.5874  |
| 69   | 16     | 54     | 68    | 16      | 53      | A    | 0           | 434283.370   | -0.133                     | 609.5871  |
| 45   | 15     | 30     | 44    | 14      | 30      | E    | 0           | 434415.097   | -0.175                     | 310.7536  |
| 27   | 24     | 3      | 26    | 23      | 3       | E    | 0           | 434536.248   | -0.057                     | 240.1150  |
| 67   | 19     | 48     | 66    | 19      | 47      | A    | 0           | 434543.988   | -0.146                     | 598.4897  |
| 67   | 19     | 48     | 66    | 19      | 47      | E    | 0           | 434561.839   | 0.022                      | 598.4889  |
| 27   | 24     | 3      | 26    | 23      | 4       | A    | 0           | 434574.979   | -0.101                     | 240.1222  |
| 27   | 24     | 4      | 26    | 23      | 3       | A    | 0           | 434574.979   | -0.101                     | 240.1222  |
| 27   | 24     | 4      | 26    | 23      | 4       | E    | 0           | 434579.359   | 0.043                      | 240.1084  |
| 45   | 15     | 31     | 44    | 14      | 31      | E    | 0           | 435149.329   | 0.008                      | 310.7143  |
| 70   | 39     | 32     | 70    | 38      | 33      | A    | 0           | 435161.850   | -0.115                     | 853.2937  |
| 70   | 39     | 31     | 70    | 38      | 32      | A    | 0           | 435161.850   | -0.115                     | 853.2937  |
| 69   | 15     | 54     | 68    | 15      | 53      | E    | 0           | 435381.350   | -0.022                     | 609.4866  |
| 29   | 23     | 6      | 28    | 22      | 6       | E    | 0           | 435389.403   | -0.031                     | 242.8475  |
| 69   | 15     | 54     | 68    | 15      | 53      | A    | 0           | 435391.702   | -0.042                     | 609.4860  |
| 29   | 23     | 7      | 28    | 22      | 7       | E    | 0           | 435429.566   | -0.219                     | 242.8396  |
| 29   | 23     | 7      | 28    | 22      | 6       | A    | 0           | 435431.105   | -0.011                     | 242.8533  |
| 29   | 23     | 6      | 28    | 22      | 7       | A    | 0           | 435431.105   | -0.011                     | 242.8533  |
| 69   | 39     | 31     | 69    | 38      | 32      | A    | 0           | 435435.713   | -0.128                     | 838.8364  |
| 69   | 39     | 30     | 69    | 38      | 31      | A    | 0           | 435435.713   | -0.128                     | 838.8364  |
| 69   | 39     | 30     | 69    | 38      | 31      | E    | 0           | 435464.919   | -0.154                     | 838.8264  |
| 69   | 39     | 31     | 69    | 38      | 32      | E    | 0           | 435480.784   | -0.054                     | 838.8383  |
| 45   | 15     | 30     | 44    | 14      | 31      | A    | 0           | 435507.138   | -0.108                     | 310.7139  |
| 68   | 20     | 49     | 67    | 20      | 48      | A    | 0           | 435635.785   | 0.073                      | 618.8292  |
| 70   | 32     | 39     | 69    | 32      | 38      | E    | 0           | 435635.785   | -0.271                     | 759.9827  |
| 67   | 39     | 28     | 67    | 38      | 29      | E    | 0           | 435978.925   | -0.222                     | 810.5443  |
| 67   | 39     | 29     | 67    | 38      | 30      | E    | 0           | 435994.655   | 0.056                      | 810.5564  |
| 46   | 13     | 33     | 45    | 12      | 34      | E    | 0           | 436160.450   | -0.068                     | 311.6357  |
| 66   | 39     | 28     | 66    | 38      | 29      | A    | 0           | 436189.611   | -0.219                     | 796.7293  |
| 66   | 39     | 27     | 66    | 38      | 28      | A    | 0           | 436189.611   | -0.219                     | 796.7293  |
| 31   | 22     | 9      | 30    | 21      | 9       | E    | 0           | 436218.541   | -0.073                     | 246.8088  |
| 66   | 39     | 28     | 66    | 38      | 29      | E    | 0           | 436235.210   | 0.105                      | 796.7313  |



| $J'$ | $K'_a$ | $K'_c$ | $J''$ | $K''_a$ | $K''_c$ | Sym. | $v_{tCH_3}$ | $\nu_{Obs.}$ | $\nu_{Obs.} - \nu_{Calc.}$ | $E_{low}$ |
|------|--------|--------|-------|---------|---------|------|-------------|--------------|----------------------------|-----------|
| 31   | 22     | 10     | 30    | 21      | 10      | E    | 0           | 436255.684   | -0.018                     | 246.7997  |
| 31   | 22     | 9      | 30    | 21      | 10      | A    | 0           | 436262.537   | -0.095                     | 246.8131  |
| 31   | 22     | 10     | 30    | 21      | 9       | A    | 0           | 436262.537   | -0.095                     | 246.8131  |
| 65   | 39     | 27     | 65    | 38      | 28      | A    | 0           | 436419.773   | -0.035                     | 783.1146  |
| 65   | 39     | 26     | 65    | 38      | 27      | A    | 0           | 436419.773   | -0.035                     | 783.1146  |
| 65   | 39     | 26     | 65    | 38      | 27      | E    | 0           | 436449.843   | -0.160                     | 783.1045  |
| 64   | 39     | 26     | 64    | 38      | 27      | A    | 0           | 436639.476   | -0.208                     | 769.7100  |
| 64   | 39     | 25     | 64    | 38      | 26      | A    | 0           | 436639.476   | -0.208                     | 769.7100  |
| 63   | 39     | 24     | 63    | 38      | 25      | E    | 0           | 436880.245   | -0.154                     | 756.5053  |
| 33   | 21     | 12     | 32    | 20      | 12      | E    | 0           | 437000.807   | -0.096                     | 252.0095  |
| 33   | 21     | 13     | 32    | 20      | 13      | E    | 0           | 437034.124   | -0.018                     | 251.9992  |
| 33   | 21     | 13     | 32    | 20      | 12      | A    | 0           | 437046.566   | -0.080                     | 252.0121  |
| 33   | 21     | 12     | 32    | 20      | 13      | A    | 0           | 437046.566   | -0.080                     | 252.0121  |
| 61   | 39     | 23     | 61    | 38      | 24      | A    | 0           | 437241.624   | -0.346                     | 730.7557  |
| 61   | 39     | 22     | 61    | 38      | 23      | A    | 0           | 437241.624   | -0.346                     | 730.7557  |
| 61   | 39     | 23     | 61    | 38      | 24      | E    | 0           | 437287.563   | -0.027                     | 730.7579  |
| 69   | 16     | 54     | 68    | 15      | 53      | E    | 0           | 437296.677   | -0.112                     | 609.4866  |
| 69   | 16     | 54     | 68    | 15      | 53      | A    | 0           | 437315.574   | 0.066                      | 609.4860  |
| 70   | 29     | 42     | 69    | 29      | 41      | A    | 0           | 437321.654   | -0.049                     | 726.0209  |
| 70   | 29     | 41     | 69    | 29      | 40      | A    | 0           | 437321.654   | -0.049                     | 726.0209  |
| 70   | 29     | 41     | 69    | 29      | 40      | E    | 0           | 437323.321   | -0.048                     | 726.0112  |
| 60   | 39     | 22     | 60    | 38      | 23      | A    | 0           | 437424.507   | -0.161                     | 718.1900  |
| 60   | 39     | 21     | 60    | 38      | 22      | A    | 0           | 437424.507   | -0.161                     | 718.1900  |
| 43   | 16     | 27     | 42    | 15      | 27      | E    | 0           | 437453.257   | -0.114                     | 297.4009  |
| 43   | 16     | 28     | 42    | 15      | 28      | E    | 0           | 437458.322   | -0.065                     | 297.3881  |
| 43   | 16     | 28     | 42    | 15      | 27      | A    | 0           | 437477.865   | -0.095                     | 297.3956  |
| 59   | 39     | 21     | 59    | 38      | 22      | A    | 0           | 437598.778   | -0.062                     | 705.8337  |
| 59   | 39     | 20     | 59    | 38      | 21      | A    | 0           | 437598.778   | -0.062                     | 705.8337  |
| 59   | 39     | 20     | 59    | 38      | 21      | E    | 0           | 437630.027   | -0.130                     | 705.8235  |
| 35   | 20     | 15     | 34    | 19      | 15      | E    | 0           | 437698.701   | -0.108                     | 258.4640  |
| 35   | 20     | 16     | 34    | 19      | 16      | E    | 0           | 437727.601   | -0.014                     | 258.4528  |
| 58   | 39     | 20     | 58    | 38      | 21      | A    | 0           | 437764.632   | -0.144                     | 693.6865  |
| 58   | 39     | 19     | 58    | 38      | 20      | A    | 0           | 437764.632   | -0.144                     | 693.6865  |
| 57   | 39     | 19     | 57    | 38      | 20      | A    | 0           | 437922.654   | -0.107                     | 681.7483  |
| 57   | 39     | 18     | 57    | 38      | 19      | A    | 0           | 437922.654   | -0.107                     | 681.7483  |
| 57   | 39     | 18     | 57    | 38      | 19      | E    | 0           | 437954.461   | 0.083                      | 681.7380  |
| 70   | 28     | 42     | 69    | 28      | 41      | A    | 0           | 438025.139   | -0.026                     | 715.5284  |
| 70   | 28     | 43     | 69    | 28      | 42      | A    | 0           | 438025.139   | -0.026                     | 715.5284  |
| 70   | 28     | 43     | 69    | 28      | 42      | E    | 0           | 438025.139   | -0.073                     | 715.5181  |
| 56   | 39     | 18     | 56    | 38      | 19      | A    | 0           | 438072.976   | -0.098                     | 670.0188  |
| 56   | 39     | 17     | 56    | 38      | 18      | A    | 0           | 438072.976   | -0.098                     | 670.0188  |
| 56   | 39     | 18     | 56    | 38      | 19      | E    | 0           | 438118.919   | 0.006                      | 670.0211  |
| 55   | 39     | 17     | 55    | 38      | 18      | A    | 0           | 438215.886   | -0.101                     | 658.4980  |
| 55   | 39     | 16     | 55    | 38      | 17      | A    | 0           | 438215.886   | -0.101                     | 658.4980  |
| 37   | 19     | 18     | 36    | 18      | 18      | E    | 0           | 438250.313   | -0.055                     | 266.1927  |
| 37   | 19     | 19     | 36    | 18      | 19      | E    | 0           | 438274.132   | -0.008                     | 266.1807  |
| 37   | 19     | 19     | 36    | 18      | 18      | A    | 0           | 438297.526   | -0.075                     | 266.1920  |
| 37   | 19     | 18     | 36    | 18      | 19      | A    | 0           | 438297.526   | -0.075                     | 266.1920  |
| 54   | 39     | 16     | 54    | 38      | 17      | A    | 0           | 438351.655   | -0.110                     | 647.1857  |
| 54   | 39     | 15     | 54    | 38      | 16      | A    | 0           | 438351.655   | -0.110                     | 647.1857  |
| 54   | 39     | 15     | 54    | 38      | 16      | E    | 0           | 438383.637   | -0.131                     | 647.1754  |
| 69   | 22     | 48     | 68    | 22      | 47      | A    | 0           | 438395.911   | -0.053                     | 647.3214  |
| 41   | 17     | 24     | 40    | 16      | 24      | E    | 0           | 438409.199   | -0.104                     | 285.6043  |
| 41   | 17     | 25     | 40    | 16      | 25      | E    | 0           | 438420.725   | -0.048                     | 285.5915  |
| 69   | 22     | 48     | 68    | 22      | 47      | E    | 0           | 438420.725   | -0.126                     | 647.3126  |
| 69   | 22     | 47     | 68    | 22      | 46      | E    | 0           | 438437.591   | 0.040                      | 647.3208  |
| 69   | 22     | 47     | 68    | 22      | 46      | A    | 0           | 438446.161   | -0.075                     | 647.3235  |
| 41   | 17     | 25     | 40    | 16      | 24      | A    | 0           | 438455.162   | 0.272                      | 285.6002  |
| 53   | 39     | 15     | 53    | 38      | 16      | A    | 0           | 438480.679   | 0.015                      | 636.0817  |
| 53   | 39     | 14     | 53    | 38      | 15      | A    | 0           | 438480.679   | 0.015                      | 636.0817  |
| 46   | 15     | 32     | 45    | 14      | 31      | E    | 0           | 438484.484   | -0.004                     | 320.3381  |
| 53   | 39     | 14     | 53    | 38      | 15      | E    | 0           | 438512.873   | 0.093                      | 636.0714  |
| 39   | 18     | 21     | 38    | 17      | 21      | E    | 0           | 438550.115   | -0.092                     | 275.2249  |
| 39   | 18     | 21     | 38    | 17      | 22      | A    | 0           | 438597.065   | -0.090                     | 275.2225  |
| 39   | 18     | 22     | 38    | 17      | 21      | A    | 0           | 438597.065   | -0.083                     | 275.2225  |
| 52   | 39     | 14     | 52    | 38      | 15      | A    | 0           | 438602.878   | -0.061                     | 625.1859  |
| 52   | 39     | 13     | 52    | 38      | 14      | A    | 0           | 438602.878   | -0.061                     | 625.1859  |
| 46   | 15     | 32     | 45    | 14      | 31      | A    | 0           | 438616.011   | -0.118                     | 320.3358  |
| 52   | 39     | 13     | 52    | 38      | 14      | E    | 0           | 438635.143   | -0.018                     | 625.1756  |
| 52   | 39     | 14     | 52    | 38      | 15      | E    | 0           | 438648.824   | -0.055                     | 625.1883  |
| 51   | 39     | 13     | 51    | 38      | 14      | A    | 0           | 438718.752   | -0.082                     | 614.4982  |
| 51   | 39     | 12     | 51    | 38      | 13      | A    | 0           | 438718.752   | -0.082                     | 614.4982  |
| 51   | 39     | 12     | 51    | 38      | 13      | E    | 0           | 438751.164   | 0.009                      | 614.4879  |
| 70   | 27     | 44     | 69    | 27      | 43      | A    | 0           | 438823.025   | -0.066                     | 705.4624  |
| 70   | 27     | 43     | 69    | 27      | 42      | A    | 0           | 438823.025   | -0.067                     | 705.4624  |
| 70   | 27     | 44     | 69    | 27      | 43      | E    | 0           | 438826.092   | -0.001                     | 705.4516  |
| 50   | 39     | 12     | 50    | 38      | 13      | A    | 0           | 438828.439   | -0.152                     | 604.0184  |
| 50   | 39     | 11     | 50    | 38      | 12      | A    | 0           | 438828.439   | -0.152                     | 604.0184  |
| 50   | 39     | 12     | 50    | 38      | 13      | E    | 0           | 438874.787   | 0.225                      | 604.0208  |
| 49   | 39     | 11     | 49    | 38      | 12      | A    | 0           | 438932.372   | -0.071                     | 593.7463  |
| 49   | 39     | 10     | 49    | 38      | 11      | A    | 0           | 438932.372   | -0.071                     | 593.7463  |
| 49   | 39     | 10     | 49    | 38      | 11      | E    | 0           | 438964.823   | -0.120                     | 593.7360  |
| 47   | 14     | 33     | 46    | 13      | 34      | E    | 0           | 439018.033   | -0.113                     | 325.6108  |
| 48   | 39     | 10     | 48    | 38      | 11      | A    | 0           | 439030.561   | -0.060                     | 583.6819  |
| 48   | 39     | 9      | 48    | 38      | 10      | A    | 0           | 439030.561   | -0.060                     | 583.6819  |
| 47   | 14     | 33     | 46    | 13      | 34      | A    | 0           | 439033.690   | -0.108                     | 325.6076  |
| 46   | 15     | 31     | 45    | 14      | 31      | E    | 0           | 439059.779   | -0.095                     | 320.3381  |
| 48   | 39     | 9      | 48    | 38      | 10      | E    | 0           | 439063.010   | -0.191                     | 583.6715  |
| 48   | 39     | 10     | 48    | 38      | 11      | E    | 0           | 439076.596   | -0.017                     | 583.6843  |
| 47   | 39     | 9      | 47    | 38      | 10      | A    | 0           | 439123.302   | -0.046                     | 573.8249  |
| 47   | 39     | 8      | 47    | 38      | 9       | A    | 0           | 439123.302   | -0.046                     | 573.8249  |
| 47   | 39     | 8      | 47    | 38      | 9       | E    | 0           | 439155.967   | -0.035                     | 573.8146  |
| 70   | 16     | 55     | 69    | 16      | 54      | E    | 0           | 439234.234   | -0.001                     | 624.0733  |
| 70   | 16     | 55     | 69    | 16      | 54      | A    | 0           | 439240.295   | -0.080                     | 624.0732  |
| 66   | 17     | 49     | 65    | 17      | 48      | A    | 0           | 439610.973   | -0.044                     | 574.9683  |
| 66   | 17     | 49     | 65    | 17      | 48      | E    | 0           | 439616.044   | -0.089                     | 574.9724  |
| 26   | 25     | 1      | 25    | 24      | 1       | E    | 0           | 439815.983   | -0.028                     | 243.7320  |
| 69   | 17     | 53     | 68    | 17      | 52      | E    | 0           | 439826.712   | -0.017                     | 615.6567  |
| 69   | 17     | 53     | 68    | 17      | 52      | A    | 0           | 439830.463   | -0.084                     | 615.6563  |
| 26   | 25     | 2      | 25    | 24      | 1       | A    | 0           | 439851.258   | -0.101                     | 243.7406  |
| 26   | 25     | 1      | 25    | 24      | 2       | A    | 0           | 439851.258   | -0.101                     | 243.7406  |
| 26   | 25     | 2      | 25    | 24      | 2       | E    | 0           | 439861.052   | -0.002                     | 243.7270  |
| 28   | 24     | 4      | 27    | 23      | 4       | E    | 0           | 440676.803   | -0.040                     | 245.6594  |
| 28   | 24     | 4      | 27    | 23      | 5       | A    | 0           | 440715.512   | -0.112                     | 245.6666  |
| 28   | 24     | 5      | 27    | 23      | 4       | A    | 0           | 440715.512   | -0.112                     | 245.6666  |
| 28   | 24     | 5      | 27    | 23      | 5       | E    | 0           | 440719.827   | -0.003                     | 245.6529  |
| 70   | 25     | 46     | 69    | 25      | 45      | A    | 0           | 440796.417   | 0.039                      | 686.6469  |
| 70   | 25     | 46     | 69    | 25      | 45      | E    | 0           | 440801.154   | -0.072                     | 686.6358  |
| 70   | 25     | 45     | 69    | 25      | 44      | E    | 0           | 440802.826   | 0.217                      | 686.6405  |
| 69   | 21     | 48     | 68    | 21      | 47      | E    | 0           | 440807.901   | -0.219                     | 640.0733  |
| 69   | 21     | 48     | 68    | 21      | 47      | A    | 0           | 440810.158   | -0.127                     | 640.0766  |
| 46   | 15     | 31     | 45    | 14      | 32      | A    | 0           | 440994.074   | 0.008                      | 320.2713  |
| 46   | 15     | 31     | 45    | 14      | 32      | E    | 0           | 441032.387   | -0.188                     | 320.2723  |
| 70   | 16     | 55     | 69    | 15      | 54      | E    | 0           | 441149.597   | -0.055                     | 624.0094  |
| 70   | 16     | 55     | 69    | 15      | 54      | A    | 0           | 441164.042   | -0.097                     | 624.0091  |
| 30   | 23     | 7      | 29    | 22      | 7       | E    | 0           | 441524.184   | -0.065                     | 248.8100  |



| $J'$ | $K'_a$ | $K'_c$ | $J''$ | $K''_a$ | $K''_c$ | Sym. | $v_{tCH_3}$ | $\nu_{Obs.}$ | $\nu_{Obs.} - \nu_{Calc.}$ | $E_{low}$ |
|------|--------|--------|-------|---------|---------|------|-------------|--------------|----------------------------|-----------|
| 30   | 23     | 8      | 29    | 22      | 8       | E    | 0           | 441564.375   | -0.183                     | 248.8021  |
| 30   | 23     | 8      | 29    | 22      | 7       | A    | 0           | 441565.916   | -0.019                     | 248.8157  |
| 30   | 23     | 7      | 29    | 22      | 8       | A    | 0           | 441565.916   | -0.019                     | 248.8157  |
| 32   | 22     | 10     | 31    | 21      | 10      | E    | 0           | 442342.309   | -0.071                     | 253.1921  |
| 32   | 22     | 11     | 31    | 21      | 11      | E    | 0           | 442379.582   | 0.176                      | 253.1830  |
| 32   | 22     | 10     | 31    | 21      | 11      | A    | 0           | 442386.310   | -0.089                     | 253.1964  |
| 32   | 22     | 11     | 31    | 21      | 10      | A    | 0           | 442386.310   | -0.089                     | 253.1964  |
| 47   | 15     | 33     | 46    | 14      | 32      | E    | 0           | 442462.292   | -0.058                     | 330.1693  |
| 47   | 15     | 33     | 46    | 14      | 32      | A    | 0           | 442564.376   | -0.086                     | 330.1669  |
| 69   | 20     | 50     | 68    | 20      | 49      | A    | 0           | 442701.065   | -0.020                     | 633.3605  |
| 69   | 20     | 50     | 68    | 20      | 49      | E    | 0           | 442712.728   | 0.073                      | 633.3576  |
| 67   | 18     | 49     | 66    | 18      | 48      | A    | 0           | 442885.199   | -0.032                     | 593.4863  |
| 67   | 18     | 49     | 66    | 18      | 48      | E    | 0           | 442905.375   | -0.016                     | 593.4885  |
| 44   | 16     | 28     | 43    | 15      | 28      | E    | 0           | 442992.613   | -0.066                     | 306.4551  |
| 44   | 16     | 29     | 43    | 15      | 28      | A    | 0           | 442999.536   | -0.118                     | 306.4502  |
| 44   | 16     | 29     | 43    | 15      | 29      | E    | 0           | 443000.956   | -0.244                     | 306.4423  |
| 44   | 16     | 28     | 43    | 15      | 29      | A    | 0           | 443079.774   | -0.095                     | 306.4480  |
| 34   | 21     | 13     | 33    | 20      | 13      | E    | 0           | 443105.411   | -0.069                     | 258.8173  |
| 68   | 19     | 49     | 67    | 19      | 48      | E    | 0           | 443136.228   | -0.025                     | 612.9843  |
| 34   | 21     | 14     | 33    | 20      | 14      | E    | 0           | 443138.614   | -0.011                     | 258.8070  |
| 34   | 21     | 14     | 33    | 20      | 13      | A    | 0           | 443151.203   | -0.015                     | 258.8199  |
| 34   | 21     | 13     | 33    | 20      | 14      | A    | 0           | 443151.203   | -0.015                     | 258.8199  |
| 70   | 23     | 48     | 69    | 23      | 47      | A    | 0           | 443536.778   | -0.023                     | 669.6800  |
| 70   | 23     | 47     | 69    | 23      | 46      | A    | 0           | 443547.712   | -0.074                     | 669.6805  |
| 36   | 20     | 16     | 35    | 19      | 16      | E    | 0           | 443771.597   | -0.072                     | 265.7011  |
| 36   | 20     | 17     | 35    | 19      | 17      | E    | 0           | 443800.263   | -0.073                     | 265.6899  |
| 36   | 20     | 16     | 35    | 19      | 17      | A    | 0           | 443818.392   | -0.089                     | 265.7021  |
| 36   | 20     | 17     | 35    | 19      | 16      | A    | 0           | 443818.392   | -0.089                     | 265.7021  |
| 42   | 17     | 25     | 41    | 16      | 25      | E    | 0           | 444206.278   | -0.106                     | 294.1801  |
| 42   | 17     | 26     | 41    | 16      | 26      | E    | 0           | 444217.286   | -0.074                     | 294.1673  |
| 69   | 19     | 51     | 68    | 19      | 50      | A    | 0           | 444235.838   | -0.089                     | 627.2031  |
| 69   | 19     | 51     | 68    | 19      | 50      | E    | 0           | 444243.348   | 0.028                      | 627.2019  |
| 42   | 17     | 26     | 41    | 16      | 25      | A    | 0           | 444251.391   | -0.113                     | 294.1759  |
| 42   | 17     | 25     | 41    | 16      | 26      | A    | 0           | 444252.958   | -0.083                     | 294.1758  |
| 38   | 19     | 19     | 37    | 18      | 19      | E    | 0           | 444271.710   | -0.102                     | 273.8656  |
| 38   | 19     | 20     | 37    | 18      | 20      | E    | 0           | 444295.342   | -0.034                     | 273.8537  |
| 38   | 19     | 19     | 37    | 18      | 19      | A    | 0           | 444318.952   | -0.072                     | 273.8649  |
| 38   | 19     | 19     | 37    | 18      | 20      | A    | 0           | 444318.952   | -0.072                     | 273.8649  |
| 40   | 18     | 22     | 39    | 17      | 23      | E    | 0           | 444487.845   | -0.098                     | 283.3427  |
| 40   | 18     | 23     | 39    | 17      | 23      | E    | 0           | 444505.633   | -0.055                     | 283.3302  |
| 40   | 18     | 23     | 39    | 17      | 22      | A    | 0           | 444534.798   | -0.048                     | 283.3402  |
| 69   | 20     | 49     | 68    | 20      | 48      | A    | 0           | 444688.687   | -0.058                     | 633.4706  |
| 69   | 20     | 49     | 68    | 20      | 48      | E    | 0           | 444701.795   | 0.018                      | 633.4684  |
| 61   | 16     | 46     | 60    | 15      | 45      | E    | 0           | 444733.201   | -0.025                     | 498.1719  |
| 69   | 16     | 53     | 68    | 16      | 52      | E    | 0           | 444869.603   | -0.020                     | 615.1257  |
| 69   | 16     | 53     | 68    | 16      | 52      | A    | 0           | 444887.501   | -0.025                     | 615.1236  |
| 70   | 17     | 54     | 69    | 17      | 53      | E    | 0           | 445025.736   | -0.053                     | 630.3277  |
| 70   | 17     | 54     | 69    | 17      | 53      | A    | 0           | 445030.595   | 0.199                      | 630.3275  |
| 70   | 22     | 49     | 69    | 22      | 48      | A    | 0           | 445355.001   | -0.209                     | 661.9447  |
| 70   | 22     | 48     | 69    | 22      | 47      | E    | 0           | 445431.005   | -0.002                     | 667.9455  |
| 48   | 15     | 34     | 47    | 14      | 33      | E    | 0           | 445697.480   | -0.058                     | 340.2549  |
| 27   | 25     | 2      | 26    | 24      | 2       | E    | 0           | 445958.126   | -0.034                     | 249.0673  |
| 52   | 15     | 38     | 51    | 14      | 37      | E    | 0           | 445974.889   | -0.036                     | 383.3181  |
| 67   | 17     | 50     | 66    | 17      | 49      | E    | 0           | 445981.373   | -0.168                     | 589.6364  |
| 67   | 17     | 50     | 66    | 17      | 49      | A    | 0           | 445983.023   | -0.035                     | 589.6321  |
| 27   | 25     | 3      | 26    | 24      | 2       | A    | 0           | 445993.420   | -0.095                     | 249.0758  |
| 27   | 25     | 2      | 26    | 24      | 3       | A    | 0           | 445993.420   | -0.095                     | 249.0758  |
| 27   | 25     | 3      | 26    | 24      | 3       | E    | 0           | 446003.173   | -0.012                     | 249.0623  |
| 47   | 15     | 32     | 46    | 14      | 33      | A    | 0           | 446623.568   | -0.072                     | 330.0579  |
| 47   | 15     | 32     | 46    | 14      | 33      | E    | 0           | 446630.150   | -0.098                     | 330.0594  |
| 29   | 24     | 5      | 28    | 23      | 5       | E    | 0           | 446815.774   | -0.052                     | 251.4112  |
| 29   | 24     | 5      | 28    | 23      | 6       | A    | 0           | 446854.507   | -0.108                     | 251.4184  |
| 29   | 24     | 6      | 28    | 23      | 5       | A    | 0           | 446854.507   | -0.108                     | 251.4184  |
| 29   | 24     | 6      | 28    | 23      | 6       | E    | 0           | 446858.783   | -0.001                     | 251.4047  |
| 70   | 40     | 30     | 70    | 39      | 31      | A    | 0           | 446917.140   | -0.095                     | 867.8092  |
| 70   | 40     | 31     | 70    | 39      | 32      | A    | 0           | 446917.140   | -0.095                     | 867.8092  |
| 70   | 21     | 50     | 69    | 21      | 49      | A    | 0           | 447526.668   | -0.059                     | 654.7520  |
| 31   | 23     | 8      | 30    | 22      | 8       | E    | 0           | 447656.144   | -0.066                     | 254.9806  |
| 31   | 23     | 9      | 30    | 22      | 9       | E    | 0           | 447696.310   | -0.165                     | 254.9727  |
| 31   | 23     | 9      | 30    | 22      | 8       | A    | 0           | 447697.872   | -0.030                     | 254.9863  |
| 31   | 23     | 8      | 30    | 22      | 9       | A    | 0           | 447697.872   | -0.030                     | 254.9863  |
| 66   | 40     | 26     | 66    | 39      | 27      | A    | 0           | 447872.931   | -0.155                     | 811.2790  |
| 66   | 40     | 27     | 66    | 39      | 28      | A    | 0           | 447872.931   | -0.155                     | 811.2790  |
| 66   | 40     | 27     | 66    | 39      | 28      | E    | 0           | 447917.068   | 0.009                      | 811.2826  |
| 49   | 15     | 35     | 48    | 14      | 34      | E    | 0           | 447930.703   | -0.055                     | 350.6042  |
| 65   | 40     | 25     | 65    | 39      | 26      | A    | 0           | 448087.039   | -0.121                     | 797.6720  |
| 65   | 40     | 26     | 65    | 39      | 27      | A    | 0           | 448087.039   | -0.121                     | 797.6720  |
| 70   | 21     | 49     | 69    | 21      | 48      | A    | 0           | 448104.694   | -0.221                     | 654.7805  |
| 70   | 21     | 49     | 69    | 21      | 48      | E    | 0           | 448108.689   | 0.020                      | 654.7771  |
| 64   | 40     | 24     | 64    | 39      | 25      | A    | 0           | 448291.741   | -0.167                     | 784.2748  |
| 64   | 40     | 25     | 64    | 39      | 26      | A    | 0           | 448291.741   | -0.167                     | 784.2748  |
| 45   | 16     | 30     | 44    | 15      | 29      | A    | 0           | 448425.824   | -0.083                     | 315.7313  |
| 45   | 16     | 29     | 44    | 15      | 29      | E    | 0           | 448448.202   | -0.170                     | 315.7355  |
| 33   | 22     | 11     | 32    | 21      | 11      | E    | 0           | 448461.346   | -0.093                     | 259.7845  |
| 45   | 16     | 30     | 44    | 15      | 30      | E    | 0           | 448471.250   | -0.062                     | 315.7223  |
| 63   | 40     | 23     | 63    | 39      | 24      | A    | 0           | 448487.493   | -0.140                     | 771.0872  |
| 63   | 40     | 24     | 63    | 39      | 25      | A    | 0           | 448487.493   | -0.140                     | 771.0872  |
| 33   | 22     | 12     | 32    | 21      | 12      | E    | 0           | 448498.369   | -0.026                     | 259.7754  |
| 33   | 22     | 11     | 32    | 21      | 12      | A    | 0           | 448505.381   | -0.078                     | 259.7887  |
| 33   | 22     | 12     | 32    | 21      | 11      | A    | 0           | 448505.381   | -0.078                     | 259.7887  |
| 45   | 16     | 29     | 44    | 15      | 30      | A    | 0           | 448580.232   | -0.068                     | 315.7270  |
| 70   | 16     | 54     | 69    | 16      | 53      | E    | 0           | 448634.476   | -0.003                     | 629.9650  |
| 62   | 40     | 22     | 62    | 39      | 23      | A    | 0           | 448674.499   | -0.128                     | 758.1092  |
| 62   | 40     | 23     | 62    | 39      | 24      | A    | 0           | 448674.499   | -0.128                     | 758.1092  |
| 62   | 40     | 22     | 62    | 39      | 23      | E    | 0           | 448709.260   | -0.129                     | 758.1000  |
| 62   | 40     | 23     | 62    | 39      | 24      | E    | 0           | 448718.972   | 0.181                      | 758.1129  |
| 61   | 40     | 21     | 61    | 39      | 22      | A    | 0           | 448852.984   | -0.196                     | 745.3405  |
| 61   | 40     | 22     | 61    | 39      | 23      | A    | 0           | 448852.984   | -0.196                     | 745.3405  |
| 50   | 15     | 36     | 49    | 14      | 35      | E    | 0           | 448873.803   | -0.047                     | 361.2267  |
| 60   | 40     | 20     | 60    | 39      | 21      | A    | 0           | 449023.444   | -0.125                     | 732.7810  |
| 60   | 40     | 21     | 60    | 39      | 22      | A    | 0           | 449023.444   | -0.125                     | 732.7810  |
| 59   | 40     | 19     | 59    | 39      | 20      | A    | 0           | 449185.958   | -0.112                     | 720.4304  |
| 59   | 40     | 20     | 59    | 39      | 21      | A    | 0           | 449185.958   | -0.112                     | 720.4304  |
| 35   | 21     | 14     | 34    | 20      | 14      | E    | 0           | 449202.625   | -0.068                     | 265.8353  |
| 59   | 40     | 19     | 59    | 39      | 20      | E    | 0           | 449221.193   | -0.107                     | 720.4212  |
| 59   | 40     | 20     | 59    | 39      | 21      | E    | 0           | 449230.434   | 0.102                      | 720.4342  |
| 35   | 21     | 15     | 34    | 20      | 15      | E    | 0           | 449235.691   | -0.044                     | 265.8251  |
| 35   | 21     | 15     | 34    | 20      | 14      | A    | 0           | 449248.332   | -0.095                     | 265.8379  |
| 35   | 21     | 14     | 34    | 20      | 15      | A    | 0           | 449248.332   | -0.095                     | 265.8379  |
| 58   | 40     | 18     | 58    | 39      | 19      | A    | 0           | 449340.788   | -0.161                     | 708.2888  |
| 58   | 40     | 19     | 58    | 39      | 20      | A    | 0           | 449340.788   | -0.161                     | 708.2888  |
| 70   | 18     | 53     | 69    | 18      | 52      | A    | 0           | 449352.248   | 0.024                      | 636.2099  |
| 70   | 18     | 53     | 69    | 18      | 52      | E    | 0           | 449352.248   | -0.080                     | 636.2099  |
| 58   | 40     | 18     | 58    | 39      | 19      | E    | 0           | 449376.609   | 0.291                      | 708.2796  |
| 56   | 40     | 16     | 56    | 39      | 17      | A    | 0           | 449628.773   | -0.107                     | 684.6314  |
| 56   | 40     | 17     | 56    | 39      | 18      | A    | 0           | 449628.773   | -0.107                     | 684.6314  |



| $J'$ | $K'_a$ | $K'_c$ | $J''$ | $K''_a$ | $K''_c$ | Sym. | $v_{tCH_3}$ | $\nu_{Obs.}$ | $\nu_{Obs.} - \nu_{Calc.}$ | $E_{low}$ |
|------|--------|--------|-------|---------|---------|------|-------------|--------------|----------------------------|-----------|
| 70   | 20     | 51     | 69    | 20      | 50      | A    | 0           | 449737.152   | 0.041                      | 648.1274  |
| 70   | 20     | 51     | 69    | 20      | 50      | E    | 0           | 449747.645   | -0.016                     | 648.1249  |
| 55   | 40     | 15     | 55    | 39      | 16      | A    | 0           | 449762.408   | -0.027                     | 673.1153  |
| 55   | 40     | 16     | 55    | 39      | 17      | A    | 0           | 449762.408   | -0.027                     | 673.1153  |
| 37   | 20     | 17     | 36    | 19      | 17      | E    | 0           | 449833.185   | -0.108                     | 273.1500  |
| 37   | 20     | 18     | 36    | 19      | 18      | E    | 0           | 449861.800   | -0.008                     | 273.1388  |
| 37   | 20     | 17     | 36    | 19      | 18      | A    | 0           | 449880.008   | -0.087                     | 273.1509  |
| 37   | 20     | 18     | 36    | 19      | 17      | A    | 0           | 449880.008   | -0.087                     | 273.1509  |
| 54   | 40     | 14     | 54    | 39      | 15      | A    | 0           | 449889.281   | -0.095                     | 661.8075  |
| 54   | 40     | 15     | 54    | 39      | 16      | A    | 0           | 449889.281   | -0.095                     | 661.8075  |
| 43   | 17     | 26     | 42    | 16      | 26      | E    | 0           | 449960.589   | -0.048                     | 302.9758  |
| 43   | 17     | 27     | 42    | 16      | 27      | E    | 0           | 449970.995   | -0.078                     | 302.9632  |
| 43   | 17     | 27     | 42    | 16      | 26      | A    | 0           | 450004.840   | 0.012                      | 302.9716  |
| 43   | 17     | 26     | 42    | 16      | 27      | A    | 0           | 450008.051   | -0.087                     | 302.9715  |
| 39   | 19     | 20     | 38    | 18      | 20      | E    | 0           | 450276.060   | -0.128                     | 281.7523  |
| 39   | 19     | 21     | 38    | 18      | 21      | E    | 0           | 450299.506   | -0.021                     | 281.7404  |
| 39   | 19     | 21     | 38    | 18      | 20      | A    | 0           | 450323.287   | -0.093                     | 281.7515  |
| 39   | 19     | 20     | 38    | 18      | 21      | A    | 0           | 450323.287   | -0.094                     | 281.7515  |
| 41   | 18     | 23     | 40    | 17      | 23      | E    | 0           | 450399.189   | -0.116                     | 291.6768  |
| 41   | 18     | 24     | 40    | 17      | 24      | E    | 0           | 450416.716   | 0.009                      | 291.6644  |
| 41   | 18     | 24     | 40    | 17      | 23      | A    | 0           | 450446.011   | -0.152                     | 291.6743  |
| 26   | 26     | 0      | 25    | 25      | 0       | E    | 0           | 451236.783   | -0.001                     | 253.0692  |
| 26   | 26     | 0      | 25    | 25      | 1       | A    | 0           | 451268.139   | -0.099                     | 253.0789  |
| 26   | 26     | 1      | 25    | 25      | 0       | A    | 0           | 451268.139   | -0.099                     | 253.0789  |
| 26   | 26     | 1      | 25    | 25      | 1       | E    | 0           | 451283.201   | -0.027                     | 253.0657  |
| 40   | 19     | 21     | 39    | 18      | 21      | E    | 0           | 456261.885   | -0.004                     | 289.8533  |
| 42   | 18     | 24     | 41    | 17      | 24      | E    | 0           | 456281.690   | -0.057                     | 300.2281  |
| 40   | 19     | 22     | 39    | 18      | 22      | E    | 0           | 456284.941   | -0.038                     | 289.8414  |
| 42   | 18     | 25     | 41    | 17      | 25      | E    | 0           | 456298.721   | -0.052                     | 300.2157  |
| 40   | 19     | 22     | 39    | 18      | 21      | A    | 0           | 456308.924   | -0.136                     | 289.8525  |
| 40   | 19     | 21     | 39    | 18      | 22      | A    | 0           | 456308.924   | -0.137                     | 289.8525  |
| 42   | 18     | 25     | 41    | 17      | 24      | A    | 0           | 456328.422   | -0.123                     | 300.2255  |
| 42   | 18     | 24     | 41    | 17      | 25      | A    | 0           | 456328.620   | -0.023                     | 300.2255  |
| 27   | 26     | 1      | 26    | 25      | 1       | E    | 0           | 457378.947   | -0.016                     | 258.4027  |
| 27   | 26     | 1      | 26    | 25      | 2       | A    | 0           | 457410.308   | -0.119                     | 258.4124  |
| 27   | 26     | 2      | 26    | 25      | 1       | A    | 0           | 457410.308   | -0.119                     | 258.4124  |
| 27   | 26     | 2      | 26    | 25      | 2       | E    | 0           | 457425.371   | -0.024                     | 258.3991  |
| 29   | 25     | 4      | 28    | 24      | 4       | E    | 0           | 458239.414   | -0.066                     | 260.3588  |
| 29   | 25     | 5      | 28    | 24      | 4       | A    | 0           | 458274.757   | -0.097                     | 260.3673  |
| 29   | 25     | 4      | 28    | 24      | 5       | E    | 0           | 458274.757   | -0.097                     | 260.3673  |
| 29   | 25     | 5      | 28    | 24      | 5       | A    | 0           | 458284.441   | -0.022                     | 260.3537  |
| 31   | 24     | 7      | 30    | 23      | 7       | E    | 0           | 459087.679   | -0.089                     | 263.5376  |
| 31   | 24     | 7      | 30    | 23      | 8       | A    | 0           | 459126.470   | -0.102                     | 263.5448  |
| 31   | 24     | 8      | 30    | 23      | 7       | A    | 0           | 459126.470   | -0.102                     | 263.5448  |
| 31   | 24     | 8      | 30    | 23      | 8       | E    | 0           | 459130.714   | 0.058                      | 263.5311  |
| 47   | 16     | 32     | 46    | 15      | 32      | E    | 0           | 459203.149   | 0.101                      | 334.9644  |
| 33   | 23     | 10     | 32    | 22      | 10      | E    | 0           | 459909.662   | -0.105                     | 267.9471  |
| 33   | 23     | 11     | 32    | 22      | 11      | E    | 0           | 459949.783   | -0.138                     | 267.9392  |
| 33   | 23     | 11     | 32    | 22      | 10      | A    | 0           | 459951.375   | -0.093                     | 267.9528  |
| 33   | 23     | 10     | 32    | 22      | 11      | A    | 0           | 459951.375   | -0.093                     | 267.9528  |
| 28   | 27     | 1      | 27    | 26      | 1       | E    | 0           | 474940.774   | 0.188                      | 273.6592  |
| 28   | 27     | 2      | 27    | 26      | 1       | A    | 0           | 474967.831   | 0.081                      | 273.6700  |
| 28   | 27     | 1      | 27    | 26      | 2       | A    | 0           | 474967.831   | 0.081                      | 273.6700  |
| 28   | 27     | 2      | 27    | 26      | 2       | E    | 0           | 474987.911   | 0.119                      | 273.6572  |
| 30   | 26     | 4      | 29    | 25      | 4       | E    | 0           | 475800.961   | 0.211                      | 275.6440  |
| 30   | 26     | 4      | 29    | 25      | 5       | A    | 0           | 475832.458   | 0.211                      | 275.6537  |
| 30   | 26     | 5      | 29    | 25      | 4       | A    | 0           | 475832.458   | 0.211                      | 275.6537  |
| 30   | 26     | 5      | 29    | 25      | 5       | E    | 0           | 475847.305   | 0.175                      | 275.6404  |
| 32   | 25     | 7      | 31    | 24      | 7       | E    | 0           | 476649.849   | 0.134                      | 278.8512  |
| 32   | 25     | 8      | 31    | 24      | 7       | A    | 0           | 476685.287   | 0.168                      | 278.8596  |
| 32   | 25     | 7      | 31    | 24      | 8       | A    | 0           | 476685.287   | 0.168                      | 278.8596  |
| 32   | 25     | 8      | 31    | 24      | 8       | E    | 0           | 476694.810   | 0.203                      | 278.8460  |
| 34   | 24     | 10     | 33    | 23      | 10      | E    | 0           | 477475.124   | 0.196                      | 283.2880  |
| 34   | 24     | 10     | 33    | 23      | 11      | A    | 0           | 477513.849   | 0.092                      | 283.2951  |
| 34   | 24     | 11     | 33    | 23      | 10      | A    | 0           | 477513.849   | 0.092                      | 283.2951  |
| 34   | 24     | 11     | 33    | 23      | 11      | E    | 0           | 477517.906   | 0.234                      | 283.2815  |
| 48   | 17     | 32     | 47    | 16      | 31      | A    | 0           | 477892.828   | 0.086                      | 350.2909  |
| 48   | 17     | 31     | 47    | 16      | 31      | E    | 0           | 477895.827   | 0.094                      | 350.2943  |
| 48   | 17     | 32     | 47    | 16      | 32      | E    | 0           | 477913.368   | 0.150                      | 350.2818  |
| 36   | 23     | 13     | 35    | 22      | 13      | E    | 0           | 478256.921   | 0.236                      | 288.9644  |
| 36   | 23     | 14     | 35    | 22      | 14      | E    | 0           | 478296.379   | -0.246                     | 288.9565  |
| 38   | 22     | 16     | 37    | 21      | 16      | E    | 0           | 478964.174   | 0.032                      | 295.8934  |
| 38   | 22     | 17     | 37    | 21      | 17      | E    | 0           | 479000.940   | 0.321                      | 295.8843  |
| 38   | 22     | 16     | 37    | 21      | 17      | A    | 0           | 479008.228   | 0.056                      | 295.8975  |
| 38   | 22     | 17     | 37    | 21      | 16      | A    | 0           | 479008.228   | 0.056                      | 295.8975  |
| 46   | 18     | 28     | 45    | 17      | 28      | E    | 0           | 479461.748   | 0.019                      | 336.6198  |
| 46   | 18     | 29     | 45    | 17      | 29      | E    | 0           | 479477.129   | 0.284                      | 336.6076  |
| 46   | 18     | 29     | 45    | 17      | 28      | A    | 0           | 479507.378   | 0.092                      | 336.6169  |
| 40   | 21     | 20     | 39    | 20      | 20      | E    | 0           | 479581.121   | 0.187                      | 304.0826  |
| 40   | 21     | 20     | 39    | 20      | 19      | A    | 0           | 479594.435   | 0.128                      | 304.0953  |
| 40   | 21     | 19     | 39    | 20      | 20      | A    | 0           | 479594.435   | 0.128                      | 304.0953  |
| 42   | 20     | 22     | 41    | 19      | 22      | E    | 0           | 479931.363   | -0.084                     | 313.5874  |
| 42   | 20     | 23     | 41    | 19      | 23      | E    | 0           | 479959.119   | 0.170                      | 313.5763  |
| 42   | 20     | 22     | 41    | 19      | 23      | A    | 0           | 479978.340   | 0.143                      | 313.5881  |
| 42   | 20     | 23     | 41    | 19      | 22      | A    | 0           | 479978.340   | 0.143                      | 313.5881  |
| 44   | 19     | 25     | 43    | 18      | 25      | E    | 0           | 479981.251   | 0.241                      | 324.4123  |
| 44   | 19     | 26     | 43    | 18      | 26      | E    | 0           | 480003.082   | 0.228                      | 324.4005  |
| 44   | 19     | 25     | 43    | 18      | 26      | A    | 0           | 480028.286   | 0.165                      | 324.4111  |
| 29   | 27     | 2      | 28    | 26      | 2       | E    | 0           | 481081.687   | 0.190                      | 279.4043  |
| 29   | 27     | 3      | 28    | 26      | 2       | A    | 0           | 481108.730   | 0.056                      | 279.4150  |
| 29   | 27     | 2      | 28    | 26      | 3       | A    | 0           | 481108.730   | 0.056                      | 279.4150  |
| 29   | 27     | 3      | 28    | 26      | 3       | E    | 0           | 481128.855   | 0.164                      | 279.4023  |
| 31   | 26     | 5      | 30    | 25      | 5       | E    | 0           | 481939.085   | 0.146                      | 281.8053  |
| 31   | 26     | 5      | 30    | 25      | 6       | A    | 0           | 481970.518   | 0.070                      | 281.8150  |
| 31   | 26     | 6      | 30    | 25      | 5       | A    | 0           | 481970.518   | 0.070                      | 281.8150  |
| 31   | 26     | 6      | 30    | 25      | 6       | E    | 0           | 481985.536   | 0.241                      | 281.8018  |
| 33   | 25     | 8      | 32    | 24      | 8       | E    | 0           | 482782.235   | 0.187                      | 285.4308  |
| 33   | 25     | 9      | 32    | 24      | 8       | A    | 0           | 482817.554   | 0.089                      | 285.4393  |
| 33   | 25     | 8      | 32    | 24      | 9       | A    | 0           | 482817.554   | 0.089                      | 285.4393  |
| 33   | 25     | 9      | 32    | 24      | 9       | E    | 0           | 482827.215   | 0.314                      | 285.4257  |
| 49   | 17     | 33     | 48    | 16      | 32      | A    | 0           | 483216.113   | 0.116                      | 360.4326  |
| 49   | 17     | 32     | 48    | 16      | 32      | E    | 0           | 483253.837   | 0.096                      | 360.4353  |
| 49   | 17     | 33     | 48    | 16      | 33      | E    | 0           | 483296.257   | 0.099                      | 360.4220  |
| 49   | 17     | 32     | 48    | 16      | 33      | A    | 0           | 483419.841   | 0.172                      | 360.4269  |
| 35   | 24     | 11     | 34    | 23      | 11      | E    | 0           | 483596.817   | 0.045                      | 290.2887  |
| 35   | 24     | 11     | 34    | 23      | 12      | A    | 0           | 483635.827   | 0.214                      | 290.2957  |
| 35   | 24     | 12     | 34    | 23      | 11      | A    | 0           | 483635.827   | 0.214                      | 290.2957  |
| 35   | 24     | 12     | 34    | 23      | 12      | E    | 0           | 483639.693   | 0.235                      | 290.2821  |
| 37   | 23     | 14     | 36    | 22      | 14      | E    | 0           | 484361.394   | 0.176                      | 296.3894  |
| 37   | 23     | 15     | 36    | 22      | 15      | E    | 0           | 484401.130   | 0.060                      | 296.3814  |
| 37   | 23     | 15     | 36    | 22      | 14      | A    | 0           | 484403.088   | 0.141                      | 296.3950  |
| 37   | 23     | 14     | 36    | 22      | 15      | A    | 0           | 484403.088   | 0.141                      | 296.3950  |
| 39   | 22     | 17     | 38    | 21      | 17      | E    | 0           | 485041.333   | 0.079                      | 303.7470  |
| 39   | 22     | 18     | 38    | 21      | 18      | E    | 0           | 485077.764   | 0.159                      | 303.7379  |
| 39   | 22     | 17     | 38    | 21      | 18      | A    | 0           | 485085.349   | 0.060                      | 303.7510  |
| 39   | 22     | 18     | 38    | 21      | 17      | A    | 0           | 485085.349   | 0.060                      | 303.7510  |



| $J'$ | $K'_a$ | $K'_c$ | $J''$ | $K''_a$ | $K''_c$ | Sym. | $v_{tCH_3}$ | $\nu_{Obs.}$ | $\nu_{Obs.} - \nu_{Calc.}$ | $E_{low}$ |
|------|--------|--------|-------|---------|---------|------|-------------|--------------|----------------------------|-----------|
| 47   | 18     | 29     | 46    | 17      | 29      | E    | 0           | 485151.239   | 0.238                      | 346.2688  |
| 47   | 18     | 30     | 46    | 17      | 30      | E    | 0           | 485165.606   | 0.072                      | 346.2567  |
| 47   | 18     | 30     | 46    | 17      | 29      | A    | 0           | 485195.281   | 0.014                      | 346.2659  |
| 47   | 18     | 29     | 46    | 17      | 30      | A    | 0           | 485200.451   | 0.272                      | 346.2657  |
| 41   | 21     | 20     | 40    | 20      | 20      | E    | 0           | 485583.277   | 0.223                      | 312.3807  |
| 41   | 21     | 21     | 40    | 20      | 21      | E    | 0           | 485615.560   | 0.341                      | 312.3705  |
| 41   | 21     | 21     | 40    | 20      | 20      | A    | 0           | 485628.823   | 0.051                      | 312.3830  |
| 41   | 21     | 20     | 40    | 20      | 21      | A    | 0           | 485628.823   | 0.051                      | 312.3830  |
| 45   | 19     | 27     | 44    | 18      | 27      | E    | 0           | 485865.772   | 0.088                      | 333.5822  |
| 45   | 19     | 27     | 44    | 18      | 26      | A    | 0           | 485891.165   | -0.105                     | 333.5928  |
| 45   | 19     | 26     | 44    | 18      | 27      | A    | 0           | 485891.367   | 0.025                      | 333.5928  |
| 43   | 20     | 23     | 42    | 19      | 23      | E    | 0           | 485899.715   | 0.094                      | 322.3170  |
| 43   | 20     | 24     | 42    | 19      | 24      | E    | 0           | 485927.053   | 0.190                      | 322.3059  |
| 28   | 28     | 1      | 27    | 27      | 0       | E    | 0           | 486360.165   | 0.227                      | 283.7583  |
| 28   | 28     | 0      | 27    | 27      | 1       | A    | 0           | 486382.571   | 0.142                      | 283.7700  |
| 28   | 28     | 1      | 27    | 27      | 0       | A    | 0           | 486382.571   | 0.142                      | 283.7700  |
| 28   | 28     | 0      | 27    | 27      | 1       | E    | 0           | 486407.561   | 0.263                      | 283.7579  |
| 52   | 16     | 36     | 51    | 15      | 37      | E    | 0           | 487175.105   | 0.240                      | 387.0830  |
| 52   | 16     | 36     | 51    | 15      | 37      | A    | 0           | 487191.310   | 0.117                      | 387.0820  |
| 30   | 27     | 3      | 29    | 26      | 3       | E    | 0           | 487221.839   | 0.266                      | 285.3561  |
| 30   | 27     | 4      | 29    | 26      | 3       | A    | 0           | 487248.849   | 0.087                      | 285.3669  |
| 30   | 27     | 3      | 29    | 26      | 4       | A    | 0           | 487248.849   | 0.087                      | 285.3669  |
| 30   | 27     | 4      | 29    | 26      | 4       | E    | 0           | 487268.994   | 0.243                      | 285.3541  |
| 32   | 26     | 6      | 31    | 25      | 6       | E    | 0           | 488075.596   | 0.124                      | 288.1741  |
| 32   | 26     | 6      | 31    | 25      | 7       | A    | 0           | 488107.023   | 0.027                      | 288.1838  |
| 32   | 26     | 7      | 31    | 25      | 6       | A    | 0           | 488107.023   | 0.027                      | 288.1838  |
| 32   | 26     | 7      | 31    | 25      | 7       | E    | 0           | 488121.998   | 0.196                      | 288.1705  |
| 50   | 17     | 34     | 49    | 16      | 33      | A    | 0           | 488404.827   | -0.070                     | 370.8046  |
| 50   | 17     | 33     | 49    | 16      | 33      | E    | 0           | 488491.239   | 0.295                      | 370.8064  |
| 50   | 17     | 34     | 49    | 16      | 34      | E    | 0           | 488607.442   | 0.038                      | 370.7906  |
| 50   | 17     | 33     | 49    | 16      | 34      | A    | 0           | 488780.686   | 0.242                      | 370.7942  |
| 34   | 25     | 9      | 33    | 24      | 9       | E    | 0           | 488911.704   | 0.116                      | 292.2187  |
| 34   | 25     | 10     | 33    | 24      | 9       | A    | 0           | 488947.105   | 0.087                      | 292.2271  |
| 34   | 25     | 9      | 33    | 24      | 10      | A    | 0           | 488947.105   | 0.087                      | 292.2271  |
| 34   | 25     | 10     | 33    | 24      | 10      | E    | 0           | 488956.565   | 0.167                      | 292.2135  |
| 36   | 24     | 12     | 35    | 23      | 12      | E    | 0           | 489714.437   | 0.188                      | 297.4983  |
| 36   | 24     | 12     | 35    | 23      | 13      | A    | 0           | 489753.246   | 0.145                      | 297.5054  |
| 36   | 24     | 13     | 35    | 23      | 12      | A    | 0           | 489753.246   | 0.145                      | 297.5054  |
| 36   | 24     | 13     | 35    | 23      | 13      | E    | 0           | 489757.104   | 0.236                      | 297.4918  |
| 38   | 23     | 15     | 37    | 22      | 15      | E    | 0           | 490459.434   | 0.240                      | 304.0244  |
| 38   | 23     | 16     | 37    | 22      | 16      | E    | 0           | 490498.897   | -0.054                     | 304.0165  |
| 38   | 23     | 16     | 37    | 22      | 15      | A    | 0           | 490501.143   | 0.211                      | 304.0300  |
| 38   | 23     | 15     | 37    | 22      | 16      | A    | 0           | 490501.143   | 0.211                      | 304.0300  |
| 48   | 18     | 31     | 47    | 17      | 31      | E    | 0           | 490803.094   | 0.134                      | 356.1282  |
| 48   | 18     | 31     | 47    | 17      | 30      | A    | 0           | 490830.779   | 0.037                      | 356.1373  |
| 48   | 18     | 30     | 47    | 17      | 31      | A    | 0           | 490840.736   | -0.038                     | 356.1370  |
| 40   | 22     | 18     | 39    | 21      | 18      | E    | 0           | 491108.891   | 0.161                      | 311.8120  |
| 40   | 22     | 19     | 39    | 21      | 19      | E    | 0           | 491145.175   | 0.230                      | 311.8029  |
| 40   | 22     | 18     | 39    | 21      | 19      | A    | 0           | 491152.897   | 0.126                      | 311.8160  |
| 40   | 22     | 19     | 39    | 21      | 18      | A    | 0           | 491152.897   | 0.126                      | 311.8160  |
| 42   | 21     | 21     | 41    | 20      | 21      | E    | 0           | 491603.527   | 0.085                      | 320.8817  |
| 42   | 21     | 22     | 41    | 20      | 22      | E    | 0           | 491635.584   | 0.173                      | 320.8714  |
| 42   | 21     | 22     | 41    | 20      | 21      | A    | 0           | 491649.181   | 0.021                      | 320.8839  |
| 42   | 21     | 21     | 41    | 20      | 22      | A    | 0           | 491649.181   | 0.021                      | 320.8839  |
| 46   | 19     | 27     | 45    | 18      | 27      | E    | 0           | 491676.122   | 0.254                      | 342.9940  |
| 46   | 19     | 28     | 45    | 18      | 28      | E    | 0           | 491696.993   | 0.090                      | 342.9822  |
| 46   | 19     | 27     | 45    | 18      | 28      | A    | 0           | 491723.090   | 0.074                      | 342.9927  |
| 44   | 20     | 24     | 43    | 19      | 24      | E    | 0           | 491847.137   | 0.110                      | 331.2619  |
| 44   | 20     | 25     | 43    | 19      | 25      | E    | 0           | 491874.022   | 0.036                      | 331.2508  |
| 44   | 20     | 24     | 43    | 19      | 25      | A    | 0           | 491893.939   | 0.175                      | 331.2624  |
| 44   | 20     | 25     | 43    | 19      | 24      | A    | 0           | 491893.939   | 0.176                      | 331.2624  |
| 29   | 28     | 2      | 28    | 27      | 1       | E    | 0           | 492501.032   | 0.230                      | 289.5015  |
| 29   | 28     | 1      | 28    | 27      | 2       | A    | 0           | 492523.371   | 0.065                      | 289.5132  |
| 29   | 28     | 2      | 28    | 27      | 1       | A    | 0           | 492523.371   | 0.065                      | 289.5132  |
| 29   | 28     | 1      | 28    | 27      | 2       | E    | 0           | 492548.401   | 0.248                      | 289.5011  |
| 31   | 27     | 4      | 30    | 26      | 4       | E    | 0           | 493360.902   | 0.318                      | 291.5150  |
| 31   | 27     | 5      | 30    | 26      | 4       | A    | 0           | 493387.867   | 0.079                      | 291.5258  |
| 31   | 27     | 4      | 30    | 26      | 5       | A    | 0           | 493387.867   | 0.079                      | 291.5258  |
| 31   | 27     | 5      | 30    | 26      | 5       | E    | 0           | 493407.766   | 0.022                      | 291.5130  |
| 51   | 17     | 35     | 50    | 16      | 34      | A    | 0           | 493417.367   | 0.033                      | 381.4096  |
| 33   | 26     | 7      | 32    | 25      | 7       | E    | 0           | 494210.187   | 0.132                      | 294.7505  |
| 33   | 26     | 7      | 32    | 25      | 8       | A    | 0           | 494241.721   | 0.128                      | 294.7601  |
| 33   | 26     | 8      | 32    | 25      | 7       | A    | 0           | 494241.721   | 0.128                      | 294.7601  |
| 33   | 26     | 8      | 32    | 25      | 8       | E    | 0           | 494256.628   | 0.274                      | 294.7469  |
| 35   | 25     | 10     | 34    | 24      | 10      | E    | 0           | 495038.058   | 0.107                      | 299.2149  |
| 35   | 25     | 11     | 34    | 24      | 10      | A    | 0           | 495073.430   | 0.033                      | 299.2233  |
| 35   | 25     | 10     | 34    | 24      | 11      | A    | 0           | 495073.430   | 0.033                      | 299.2233  |
| 35   | 25     | 11     | 34    | 24      | 11      | E    | 0           | 495082.905   | 0.192                      | 299.2097  |
| 37   | 24     | 13     | 36    | 23      | 13      | E    | 0           | 495827.287   | 0.427                      | 304.9173  |
| 37   | 24     | 13     | 36    | 23      | 14      | A    | 0           | 495865.850   | 0.125                      | 304.9244  |
| 37   | 24     | 14     | 36    | 23      | 13      | A    | 0           | 495865.850   | 0.125                      | 304.9244  |
| 37   | 24     | 14     | 36    | 23      | 14      | E    | 0           | 495869.509   | 0.102                      | 304.9107  |
| 49   | 18     | 31     | 48    | 17      | 31      | E    | 0           | 496370.225   | 0.104                      | 366.2352  |
| 49   | 18     | 32     | 48    | 17      | 32      | E    | 0           | 496383.727   | 0.092                      | 366.2232  |
| 49   | 18     | 32     | 48    | 17      | 31      | A    | 0           | 496406.975   | -0.001                     | 366.2322  |
| 49   | 18     | 31     | 48    | 17      | 32      | A    | 0           | 496427.109   | 0.073                      | 366.2317  |
| 39   | 23     | 16     | 38    | 22      | 16      | E    | 0           | 496549.990   | 0.028                      | 311.8699  |
| 39   | 23     | 17     | 38    | 22      | 17      | E    | 0           | 496589.642   | 0.028                      | 311.8620  |
| 39   | 23     | 17     | 38    | 22      | 16      | A    | 0           | 496591.910   | 0.198                      | 311.8755  |
| 39   | 23     | 16     | 38    | 22      | 17      | A    | 0           | 496591.910   | 0.198                      | 311.8755  |
| 41   | 22     | 19     | 40    | 21      | 19      | E    | 0           | 497165.828   | 0.129                      | 320.0889  |
| 41   | 22     | 20     | 40    | 21      | 20      | E    | 0           | 497201.879   | 0.116                      | 320.0797  |
| 41   | 22     | 19     | 40    | 21      | 20      | A    | 0           | 497209.885   | 0.138                      | 320.0928  |
| 41   | 22     | 20     | 40    | 21      | 19      | A    | 0           | 497209.885   | 0.138                      | 320.0928  |
| 47   | 19     | 28     | 46    | 18      | 28      | E    | 0           | 497473.201   | 0.174                      | 352.6129  |
| 47   | 19     | 29     | 46    | 18      | 29      | E    | 0           | 497493.758   | 0.154                      | 352.6012  |
| 47   | 19     | 28     | 46    | 18      | 29      | A    | 0           | 497520.124   | -0.139                     | 352.6115  |
| 43   | 21     | 22     | 42    | 20      | 22      | E    | 0           | 497608.599   | 0.060                      | 329.5962  |
| 43   | 21     | 23     | 42    | 20      | 23      | E    | 0           | 497640.505   | 0.211                      | 329.5860  |
| 43   | 21     | 23     | 42    | 20      | 22      | A    | 0           | 497654.345   | 0.086                      | 329.5985  |
| 43   | 21     | 22     | 42    | 20      | 23      | A    | 0           | 497654.345   | 0.086                      | 329.5985  |
| 45   | 20     | 25     | 44    | 19      | 25      | E    | 0           | 497771.968   | 0.094                      | 340.4227  |
| 45   | 20     | 26     | 44    | 19      | 26      | E    | 0           | 497799.142   | 0.618                      | 340.4116  |
| 45   | 20     | 25     | 44    | 19      | 26      | A    | 0           | 497818.715   | 0.107                      | 340.4232  |
| 45   | 20     | 26     | 44    | 19      | 25      | A    | 0           | 497818.715   | 0.111                      | 340.4232  |
| 30   | 28     | 3      | 29    | 27      | 2       | E    | 0           | 498641.158   | 0.107                      | 295.4514  |
| 30   | 28     | 2      | 29    | 27      | 3       | A    | 0           | 498663.631   | 0.060                      | 295.4631  |
| 30   | 28     | 3      | 29    | 27      | 2       | A    | 0           | 498663.631   | 0.060                      | 295.4631  |
| 30   | 28     | 2      | 29    | 27      | 3       | E    | 0           | 498688.698   | 0.305                      | 295.4510  |
| 52   | 17     | 35     | 51    | 16      | 36      | A    | 0           | 499390.689   | 0.133                      | 392.2182  |
| 32   | 27     | 5      | 31    | 26      | 5       | E    | 0           | 499498.417   | 0.127                      | 297.8811  |
| 32   | 27     | 6      | 31    | 26      | 5       | A    | 0           | 499525.601   | 0.091                      | 297.8918  |
| 32   | 27     | 5      | 31    | 26      | 6       | A    | 0           | 499525.601   | 0.091                      | 297.8918  |
| 32   | 27     | 6      | 31    | 26      | 6       | E    | 0           | 499545.624   | 0.195                      | 297.8791  |
| 34   | 26     | 8      | 33    | 25      | 8       | E    | 0           | 500342.520   | 0.145                      | 301.5347  |
| 34   | 26     | 8      | 33    | 25      | 9       | A    | 0           | 500374.062   | 0.133                      | 301.5443  |



| $J'$ | $K'_a$ | $K'_c$ | $J''$ | $K''_a$ | $K''_c$ | Sym. | $v_{tCH_3}$ | $\nu_{Obs.}$ | $\nu_{Obs.} - \nu_{Calc.}$ | $E_{low}$ |
|------|--------|--------|-------|---------|---------|------|-------------|--------------|----------------------------|-----------|
| 34   | 26     | 9      | 33    | 25      | 8       | A    | 0           | 500374.062   | 0.133                      | 301.5443  |
| 34   | 26     | 9      | 33    | 25      | 9       | E    | 0           | 500389.053   | 0.414                      | 301.5311  |
| 36   | 25     | 11     | 35    | 24      | 11      | E    | 0           | 501160.881   | 0.144                      | 306.4197  |
| 36   | 25     | 12     | 35    | 24      | 11      | A    | 0           | 501196.358   | 0.161                      | 306.4281  |
| 36   | 25     | 11     | 35    | 24      | 12      | A    | 0           | 501196.358   | 0.161                      | 306.4281  |
| 36   | 25     | 12     | 35    | 24      | 12      | E    | 0           | 501205.672   | 0.228                      | 306.4146  |
| 50   | 18     | 32     | 49    | 17      | 32      | E    | 0           | 501887.580   | -0.026                     | 376.5549  |
| 50   | 18     | 33     | 49    | 17      | 33      | E    | 0           | 501901.393   | -0.037                     | 376.5430  |
| 50   | 18     | 33     | 49    | 17      | 32      | A    | 0           | 501915.523   | 0.127                      | 376.5521  |
| 38   | 24     | 14     | 37    | 23      | 14      | E    | 0           | 501934.194   | 0.111                      | 312.5459  |
| 38   | 24     | 14     | 37    | 23      | 15      | A    | 0           | 501973.098   | 0.134                      | 312.5529  |
| 38   | 24     | 15     | 37    | 23      | 14      | A    | 0           | 501973.098   | 0.134                      | 312.5529  |
| 38   | 24     | 15     | 37    | 23      | 15      | E    | 0           | 501976.733   | 0.182                      | 312.5393  |
| 40   | 23     | 17     | 39    | 22      | 17      | E    | 0           | 502632.737   | -0.101                     | 319.9262  |
| 40   | 23     | 18     | 39    | 22      | 18      | E    | 0           | 502672.388   | 0.014                      | 319.9183  |
| 40   | 23     | 18     | 39    | 22      | 17      | A    | 0           | 502674.716   | 0.117                      | 319.9317  |
| 40   | 23     | 17     | 39    | 22      | 18      | A    | 0           | 502674.716   | 0.117                      | 319.9317  |
| 42   | 22     | 20     | 41    | 21      | 20      | E    | 0           | 503211.347   | 0.110                      | 328.5780  |
| 48   | 19     | 29     | 47    | 18      | 29      | E    | 0           | 503232.715   | 0.224                      | 362.4517  |
| 42   | 22     | 21     | 41    | 21      | 21      | E    | 0           | 503247.284   | 0.145                      | 328.5689  |
| 48   | 19     | 30     | 47    | 18      | 29      | A    | 0           | 503279.385   | 0.238                      | 362.4503  |
| 44   | 21     | 23     | 43    | 20      | 23      | E    | 0           | 503597.371   | 0.321                      | 338.5249  |
| 44   | 21     | 24     | 43    | 20      | 24      | E    | 0           | 503628.789   | 0.215                      | 338.5147  |
| 44   | 21     | 24     | 43    | 20      | 23      | A    | 0           | 503642.879   | 0.104                      | 338.5270  |
| 44   | 21     | 23     | 43    | 20      | 24      | A    | 0           | 503642.879   | 0.104                      | 338.5270  |
| 46   | 20     | 26     | 45    | 19      | 26      | E    | 0           | 503672.350   | 0.123                      | 349.8000  |
| 46   | 20     | 27     | 45    | 19      | 27      | E    | 0           | 503698.590   | 0.048                      | 349.7890  |
| 46   | 20     | 26     | 45    | 19      | 27      | A    | 0           | 503719.010   | 0.048                      | 349.8004  |
| 29   | 29     | 1      | 28    | 28      | 1       | E    | 0           | 503919.398   | 0.040                      | 299.9815  |
| 29   | 29     | 1      | 28    | 28      | 0       | A    | 0           | 503936.883   | -0.010                     | 299.9939  |
| 29   | 29     | 0      | 28    | 28      | 1       | A    | 0           | 503936.883   | -0.010                     | 299.9939  |
| 29   | 29     | 0      | 28    | 28      | 0       | E    | 0           | 503966.597   | 0.364                      | 299.9827  |
| 53   | 17     | 36     | 52    | 16      | 37      | A    | 0           | 504710.571   | -0.098                     | 403.2767  |
| 53   | 17     | 36     | 52    | 16      | 37      | E    | 0           | 504748.607   | -0.198                     | 403.2758  |
| 31   | 28     | 4      | 30    | 27      | 3       | E    | 0           | 504780.625   | 0.134                      | 301.6081  |
| 31   | 28     | 3      | 30    | 27      | 4       | A    | 0           | 504803.162   | 0.137                      | 301.6198  |
| 31   | 28     | 4      | 30    | 27      | 3       | A    | 0           | 504803.162   | 0.137                      | 301.6198  |
| 31   | 28     | 3      | 30    | 27      | 4       | E    | 0           | 504828.077   | 0.258                      | 301.6077  |
| 33   | 27     | 6      | 32    | 26      | 6       | E    | 0           | 505634.620   | 0.184                      | 304.4545  |
| 33   | 27     | 7      | 32    | 26      | 6       | A    | 0           | 505661.753   | 0.081                      | 304.4652  |
| 33   | 27     | 6      | 32    | 26      | 7       | A    | 0           | 505661.753   | 0.081                      | 304.4652  |
| 33   | 27     | 7      | 32    | 26      | 7       | E    | 0           | 505681.720   | 0.170                      | 304.4525  |
| 35   | 26     | 9      | 34    | 25      | 9       | E    | 0           | 506472.278   | 0.175                      | 308.5270  |
| 35   | 26     | 9      | 34    | 25      | 10      | A    | 0           | 506503.747   | 0.073                      | 308.5366  |
| 35   | 26     | 10     | 34    | 25      | 9       | A    | 0           | 506503.747   | 0.073                      | 308.5366  |
| 35   | 26     | 10     | 34    | 25      | 10      | E    | 0           | 506518.495   | 0.168                      | 308.5234  |
| 37   | 25     | 12     | 36    | 24      | 12      | E    | 0           | 507279.520   | 0.001                      | 313.8334  |
| 37   | 25     | 13     | 36    | 24      | 12      | A    | 0           | 507315.129   | 0.132                      | 313.8418  |
| 37   | 25     | 12     | 36    | 24      | 13      | A    | 0           | 507315.129   | 0.132                      | 313.8418  |
| 37   | 25     | 13     | 36    | 24      | 13      | E    | 0           | 507324.391   | 0.224                      | 313.8283  |
| 51   | 18     | 33     | 50    | 17      | 33      | E    | 0           | 507333.209   | 0.261                      | 387.1007  |
| 51   | 18     | 34     | 50    | 17      | 33      | A    | 0           | 507345.009   | 0.348                      | 387.0982  |
| 51   | 18     | 34     | 50    | 17      | 34      | E    | 0           | 507349.840   | -0.043                     | 387.0888  |
| 39   | 24     | 15     | 38    | 23      | 15      | E    | 0           | 508035.558   | 0.187                      | 320.3844  |
| 39   | 24     | 15     | 38    | 23      | 16      | A    | 0           | 508074.359   | 0.092                      | 320.3914  |
| 39   | 24     | 16     | 38    | 23      | 15      | A    | 0           | 508074.359   | 0.092                      | 320.3914  |
| 39   | 24     | 16     | 38    | 23      | 16      | E    | 0           | 508077.926   | 0.175                      | 320.3778  |
| 41   | 23     | 18     | 40    | 22      | 18      | E    | 0           | 508707.256   | 0.158                      | 328.1937  |
| 41   | 23     | 19     | 40    | 22      | 19      | E    | 0           | 508746.377   | -0.133                     | 328.1857  |
| 41   | 23     | 19     | 40    | 22      | 18      | A    | 0           | 508749.035   | 0.163                      | 328.1991  |
| 41   | 23     | 18     | 40    | 22      | 19      | A    | 0           | 508749.035   | 0.163                      | 328.1991  |
| 49   | 19     | 31     | 48    | 18      | 31      | E    | 0           | 508970.174   | -0.045                     | 372.4996  |
| 43   | 22     | 21     | 42    | 21      | 21      | E    | 0           | 509244.501   | 0.134                      | 337.2798  |
| 43   | 22     | 22     | 42    | 21      | 22      | E    | 0           | 509280.183   | 0.091                      | 337.2706  |
| 43   | 22     | 21     | 42    | 21      | 22      | A    | 0           | 509288.582   | 0.147                      | 337.2836  |
| 43   | 22     | 22     | 42    | 21      | 21      | A    | 0           | 509288.582   | 0.147                      | 337.2836  |
| 47   | 20     | 27     | 46    | 19      | 27      | E    | 0           | 509545.820   | -0.168                     | 359.3945  |
| 45   | 21     | 24     | 44    | 20      | 24      | E    | 0           | 509567.668   | 0.074                      | 347.6682  |
| 47   | 20     | 28     | 46    | 19      | 28      | E    | 0           | 509571.834   | -0.106                     | 359.3835  |
| 47   | 20     | 27     | 46    | 19      | 28      | A    | 0           | 509592.902   | 0.173                      | 359.3948  |
| 45   | 21     | 25     | 44    | 20      | 25      | E    | 0           | 509599.063   | 0.197                      | 347.6580  |
| 45   | 21     | 25     | 44    | 20      | 24      | A    | 0           | 509613.528   | 0.204                      | 347.6703  |
| 45   | 21     | 24     | 44    | 20      | 25      | A    | 0           | 509613.528   | 0.203                      | 347.6703  |
| 55   | 17     | 39     | 54    | 16      | 38      | E    | 0           | 509846.670   | 0.267                      | 426.2441  |
| 55   | 17     | 39     | 54    | 16      | 38      | A    | 0           | 509933.449   | 0.422                      | 426.2433  |
| 30   | 29     | 2      | 29    | 28      | 2       | E    | 0           | 510059.745   | 0.220                      | 305.9296  |
| 30   | 29     | 2      | 29    | 28      | 1       | A    | 0           | 510077.183   | 0.108                      | 305.9420  |
| 30   | 29     | 1      | 29    | 28      | 2       | A    | 0           | 510077.183   | 0.108                      | 305.9420  |
| 30   | 29     | 1      | 29    | 28      | 1       | E    | 0           | 510106.571   | 0.177                      | 305.9307  |
| 54   | 17     | 37     | 53    | 16      | 38      | A    | 0           | 510131.048   | 0.058                      | 414.5669  |
| 54   | 17     | 37     | 53    | 16      | 38      | E    | 0           | 510138.165   | 0.229                      | 414.5665  |
| 32   | 28     | 5      | 31    | 27      | 4       | E    | 0           | 510919.199   | 0.291                      | 307.9718  |
| 32   | 28     | 4      | 31    | 27      | 5       | A    | 0           | 510941.645   | 0.185                      | 307.9834  |
| 32   | 28     | 5      | 31    | 27      | 4       | A    | 0           | 510941.645   | 0.185                      | 307.9834  |
| 32   | 28     | 4      | 31    | 27      | 5       | E    | 0           | 510966.412   | 0.191                      | 307.9713  |
| 59   | 17     | 43     | 58    | 16      | 42      | E    | 0           | 511222.687   | 0.181                      | 475.2956  |
| 59   | 17     | 43     | 58    | 16      | 42      | A    | 0           | 511324.270   | 0.164                      | 475.2926  |
| 34   | 27     | 7      | 33    | 26      | 7       | E    | 0           | 511768.939   | 0.190                      | 311.2356  |
| 34   | 27     | 8      | 33    | 26      | 7       | A    | 0           | 511795.988   | -0.016                     | 311.2462  |
| 34   | 27     | 7      | 33    | 26      | 8       | A    | 0           | 511795.988   | -0.016                     | 311.2462  |
| 34   | 27     | 8      | 33    | 26      | 8       | E    | 0           | 511816.003   | 0.166                      | 311.2335  |
| 56   | 17     | 40     | 55    | 16      | 39      | E    | 0           | 512277.877   | 0.161                      | 438.0889  |
| 56   | 17     | 40     | 55    | 16      | 39      | A    | 0           | 512359.849   | 0.333                      | 438.0877  |
| 36   | 26     | 10     | 35    | 25      | 10      | E    | 0           | 512599.084   | 0.192                      | 315.7276  |
| 36   | 26     | 10     | 35    | 25      | 11      | A    | 0           | 512630.624   | 0.142                      | 315.7371  |
| 36   | 26     | 11     | 35    | 25      | 10      | A    | 0           | 512630.624   | 0.142                      | 315.7371  |
| 36   | 26     | 11     | 35    | 25      | 11      | E    | 0           | 512645.288   | 0.216                      | 315.7239  |
| 52   | 18     | 35     | 51    | 17      | 34      | A    | 0           | 512679.277   | 0.119                      | 397.8722  |
| 52   | 18     | 34     | 51    | 17      | 34      | E    | 0           | 512694.259   | 0.276                      | 397.8742  |
| 52   | 18     | 35     | 51    | 17      | 35      | E    | 0           | 512723.527   | 0.066                      | 397.8619  |
| 52   | 18     | 34     | 51    | 17      | 35      | A    | 0           | 512821.423   | 0.093                      | 397.8683  |
| 58   | 17     | 42     | 57    | 16      | 41      | E    | 0           | 513237.698   | 0.177                      | 462.6064  |
| 38   | 25     | 14     | 37    | 24      | 13      | A    | 0           | 513429.473   | 0.124                      | 321.4647  |
| 38   | 25     | 13     | 37    | 24      | 14      | A    | 0           | 513429.473   | 0.124                      | 321.4647  |
| 38   | 25     | 14     | 37    | 24      | 14      | E    | 0           | 513438.501   | 0.066                      | 321.4512  |
| 40   | 24     | 16     | 39    | 23      | 16      | E    | 0           | 514130.329   | 0.184                      | 328.4331  |
| 40   | 24     | 16     | 39    | 23      | 17      | A    | 0           | 514169.252   | 0.193                      | 328.4400  |
| 40   | 24     | 17     | 39    | 23      | 16      | A    | 0           | 514169.252   | 0.193                      | 328.4400  |
| 40   | 24     | 17     | 39    | 23      | 17      | E    | 0           | 514172.667   | 0.237                      | 328.4265  |
| 50   | 19     | 31     | 49    | 18      | 31      | E    | 0           | 514623.849   | 0.244                      | 382.7923  |
| 50   | 19     | 32     | 49    | 18      | 32      | E    | 0           | 514642.667   | 0.114                      | 382.7808  |
| 50   | 19     | 32     | 49    | 18      | 31      | A    | 0           | 514669.151   | 0.216                      | 382.7907  |
| 50   | 19     | 31     | 49    | 18      | 32      | A    | 0           | 514672.498   | 0.110                      | 382.7906  |
| 42   | 23     | 19     | 41    | 22      | 19      | E    | 0           | 514772.128   | 0.149                      | 336.6726  |
| 42   | 23     | 20     | 41    | 22      | 20      | E    | 0           | 514811.477   | 0.221                      | 336.6646  |
| 42   | 23     | 20     | 41    | 22      | 19      | A    | 0           | 514813.949   | 0.178                      | 336.6780  |



| $J'$ | $K'_a$ | $K'_c$ | $J''$ | $K''_a$ | $K''_c$ | Sym. | $v_{tCH_3}$ | $\nu_{Obs.}$ | $\nu_{Obs.} - \nu_{Calc.}$ | $E_{low}$ |
|------|--------|--------|-------|---------|---------|------|-------------|--------------|----------------------------|-----------|
| 42   | 23     | 19     | 41    | 22      | 20      | A    | 0           | 514813.949   | 0.178                      | 336.6780  |
| 44   | 22     | 22     | 43    | 21      | 22      | E    | 0           | 515264.106   | 0.053                      | 346.1947  |
| 44   | 22     | 23     | 43    | 21      | 23      | E    | 0           | 515299.750   | 0.163                      | 346.1855  |
| 44   | 22     | 22     | 43    | 21      | 23      | A    | 0           | 515308.250   | 0.117                      | 346.1984  |
| 44   | 22     | 23     | 43    | 21      | 22      | A    | 0           | 515308.250   | 0.117                      | 346.1984  |
| 48   | 20     | 28     | 47    | 19      | 28      | E    | 0           | 515391.029   | 0.156                      | 369.2068  |
| 48   | 20     | 29     | 47    | 19      | 29      | E    | 0           | 515416.503   | 0.072                      | 369.1958  |
| 48   | 20     | 28     | 47    | 19      | 29      | A    | 0           | 515437.777   | 0.144                      | 369.2070  |
| 46   | 21     | 25     | 45    | 20      | 25      | E    | 0           | 515518.928   | 0.238                      | 357.0266  |
| 46   | 21     | 26     | 45    | 20      | 26      | E    | 0           | 515549.819   | 0.128                      | 357.0164  |
| 46   | 21     | 26     | 45    | 20      | 25      | A    | 0           | 515564.483   | 0.055                      | 357.0286  |
| 46   | 21     | 25     | 45    | 20      | 26      | A    | 0           | 515564.483   | 0.054                      | 357.0286  |
| 55   | 17     | 38     | 54    | 16      | 39      | E    | 0           | 515757.171   | 0.218                      | 426.0885  |
| 55   | 17     | 38     | 54    | 16      | 39      | A    | 0           | 515768.594   | 0.331                      | 426.0885  |
| 31   | 29     | 3      | 30    | 28      | 3       | E    | 0           | 516199.295   | 0.209                      | 312.0843  |
| 31   | 29     | 3      | 30    | 28      | 2       | A    | 0           | 516216.781   | 0.129                      | 312.0967  |
| 31   | 29     | 2      | 30    | 28      | 3       | A    | 0           | 516216.781   | 0.129                      | 312.0967  |
| 31   | 29     | 2      | 30    | 28      | 2       | E    | 0           | 516246.135   | 0.189                      | 312.0854  |
| 33   | 28     | 6      | 32    | 27      | 5       | E    | 0           | 517056.301   | 0.219                      | 314.5426  |
| 33   | 28     | 5      | 32    | 27      | 6       | A    | 0           | 517078.763   | 0.111                      | 314.5542  |
| 33   | 28     | 6      | 32    | 27      | 5       | A    | 0           | 517078.763   | 0.111                      | 314.5542  |
| 33   | 28     | 5      | 32    | 27      | 6       | E    | 0           | 517103.575   | 0.199                      | 314.5421  |
| 53   | 18     | 36     | 52    | 17      | 35      | A    | 0           | 517896.778   | 0.097                      | 408.8761  |
| 35   | 27     | 8      | 34    | 26      | 8       | E    | 0           | 517901.100   | 0.154                      | 318.2243  |
| 35   | 27     | 9      | 34    | 26      | 8       | A    | 0           | 517928.371   | 0.152                      | 318.2350  |
| 35   | 27     | 8      | 34    | 26      | 9       | A    | 0           | 517928.371   | 0.152                      | 318.2350  |
| 35   | 27     | 9      | 34    | 26      | 9       | E    | 0           | 517948.064   | 0.062                      | 318.2223  |
| 53   | 18     | 35     | 52    | 17      | 35      | E    | 0           | 517950.820   | -0.004                     | 408.8773  |
| 53   | 18     | 36     | 52    | 17      | 36      | E    | 0           | 518020.941   | 0.108                      | 408.8636  |
| 53   | 18     | 35     | 52    | 17      | 36      | A    | 0           | 518159.235   | -0.007                     | 408.8688  |
| 37   | 26     | 11     | 36    | 25      | 11      | E    | 0           | 518722.510   | 0.133                      | 323.1366  |
| 37   | 26     | 11     | 36    | 25      | 12      | A    | 0           | 518754.116   | 0.128                      | 323.1462  |
| 37   | 26     | 12     | 36    | 25      | 11      | A    | 0           | 518754.116   | 0.128                      | 323.1462  |
| 37   | 26     | 12     | 36    | 25      | 12      | E    | 0           | 518768.497   | -0.011                     | 323.1330  |
| 39   | 25     | 14     | 38    | 24      | 14      | E    | 0           | 519503.538   | 0.265                      | 329.2886  |
| 39   | 25     | 15     | 38    | 24      | 14      | A    | 0           | 519538.872   | 0.084                      | 329.2969  |
| 39   | 25     | 14     | 38    | 24      | 15      | A    | 0           | 519538.872   | 0.084                      | 329.2969  |
| 39   | 25     | 15     | 38    | 24      | 15      | E    | 0           | 519547.805   | 0.024                      | 329.2835  |
| 41   | 24     | 17     | 40    | 23      | 17      | E    | 0           | 520217.947   | 0.147                      | 336.6923  |
| 51   | 19     | 32     | 50    | 18      | 32      | E    | 0           | 520246.844   | 0.110                      | 393.2961  |
| 41   | 24     | 17     | 40    | 23      | 18      | A    | 0           | 520257.030   | 0.296                      | 336.6991  |
| 41   | 24     | 18     | 40    | 23      | 17      | A    | 0           | 520257.030   | 0.296                      | 336.6991  |
| 41   | 24     | 18     | 40    | 23      | 18      | E    | 0           | 520260.096   | 0.116                      | 336.6856  |
| 51   | 19     | 33     | 50    | 18      | 32      | A    | 0           | 520290.283   | -0.030                     | 393.2944  |
| 51   | 19     | 32     | 50    | 18      | 33      | A    | 0           | 520297.460   | 0.129                      | 393.2942  |
| 43   | 23     | 20     | 42    | 22      | 20      | E    | 0           | 520826.635   | -0.047                     | 345.3633  |
| 43   | 23     | 21     | 42    | 22      | 21      | E    | 0           | 520865.900   | 0.089                      | 345.3554  |
| 43   | 23     | 21     | 42    | 22      | 20      | A    | 0           | 520868.618   | 0.128                      | 345.3687  |
| 43   | 23     | 20     | 42    | 22      | 21      | A    | 0           | 520868.618   | 0.128                      | 345.3687  |
| 49   | 20     | 29     | 48    | 19      | 29      | E    | 0           | 521204.547   | 0.162                      | 379.2377  |
| 49   | 20     | 29     | 48    | 19      | 30      | A    | 0           | 521251.259   | 0.074                      | 379.2378  |
| 45   | 22     | 23     | 44    | 21      | 23      | E    | 0           | 521269.498   | 0.303                      | 355.3231  |
| 45   | 22     | 24     | 44    | 21      | 24      | E    | 0           | 521304.747   | 0.226                      | 355.3139  |
| 45   | 22     | 23     | 44    | 21      | 24      | A    | 0           | 521313.437   | 0.147                      | 355.3268  |
| 45   | 22     | 24     | 44    | 21      | 23      | A    | 0           | 521313.437   | 0.147                      | 355.3268  |
| 30   | 30     | 1      | 29    | 29      | 1       | E    | 0           | 521477.380   | 0.156                      | 316.7905  |
| 47   | 21     | 27     | 46    | 20      | 27      | E    | 0           | 521479.756   | 0.299                      | 366.5905  |
| 30   | 30     | 0      | 29    | 29      | 1       | A    | 0           | 521489.655   | 0.083                      | 316.8035  |
| 30   | 30     | 1      | 29    | 29      | 0       | A    | 0           | 521489.655   | 0.083                      | 316.8035  |
| 47   | 21     | 27     | 46    | 20      | 26      | A    | 0           | 521494.605   | 0.106                      | 366.6026  |
| 47   | 21     | 26     | 46    | 20      | 27      | A    | 0           | 521494.605   | 0.105                      | 366.6026  |
| 30   | 30     | 0      | 29    | 29      | 0       | E    | 0           | 521523.202   | 0.210                      | 316.7932  |
| 56   | 17     | 39     | 55    | 16      | 40      | E    | 0           | 521775.470   | 0.047                      | 437.8408  |
| 56   | 17     | 39     | 55    | 16      | 40      | A    | 0           | 521795.503   | 0.386                      | 437.8405  |
| 32   | 29     | 4      | 31    | 28      | 4       | E    | 0           | 522338.089   | 0.234                      | 318.4458  |
| 32   | 29     | 4      | 31    | 28      | 3       | A    | 0           | 522355.526   | 0.086                      | 318.4582  |
| 32   | 29     | 3      | 31    | 28      | 4       | A    | 0           | 522355.526   | 0.086                      | 318.4582  |
| 32   | 29     | 3      | 31    | 28      | 3       | E    | 0           | 522384.920   | 0.214                      | 318.4469  |
| 54   | 18     | 37     | 53    | 17      | 36      | A    | 0           | 522965.010   | 0.150                      | 420.1121  |
| 54   | 18     | 36     | 53    | 17      | 36      | E    | 0           | 523070.882   | 0.021                      | 420.1125  |
| 34   | 28     | 7      | 33    | 27      | 6       | E    | 0           | 523192.018   | 0.242                      | 321.3207  |
| 34   | 28     | 6      | 33    | 27      | 7       | A    | 0           | 523214.441   | 0.075                      | 321.3323  |
| 34   | 28     | 7      | 33    | 27      | 6       | A    | 0           | 523214.441   | 0.075                      | 321.3323  |
| 34   | 28     | 6      | 33    | 27      | 7       | E    | 0           | 523239.196   | 0.146                      | 321.3202  |
| 54   | 18     | 37     | 53    | 17      | 37      | E    | 0           | 523248.516   | -0.247                     | 420.0951  |
| 54   | 18     | 36     | 53    | 17      | 37      | A    | 0           | 523440.565   | 0.116                      | 420.0990  |
| 36   | 27     | 9      | 35    | 26      | 9       | E    | 0           | 524030.983   | 0.258                      | 325.4211  |
| 36   | 27     | 10     | 35    | 26      | 9       | A    | 0           | 524058.131   | 0.111                      | 325.4317  |
| 36   | 27     | 9      | 35    | 26      | 10      | A    | 0           | 524058.131   | 0.111                      | 325.4317  |
| 36   | 27     | 10     | 35    | 26      | 10      | E    | 0           | 524077.998   | 0.252                      | 325.4190  |
| 38   | 26     | 12     | 37    | 25      | 12      | E    | 0           | 524842.419   | 0.244                      | 330.7545  |
| 38   | 26     | 12     | 37    | 25      | 13      | A    | 0           | 524873.901   | 0.093                      | 330.7640  |
| 38   | 26     | 13     | 37    | 25      | 12      | A    | 0           | 524873.901   | 0.093                      | 330.7640  |
| 38   | 26     | 13     | 37    | 25      | 13      | E    | 0           | 524888.443   | 0.190                      | 330.7508  |
| 40   | 25     | 15     | 39    | 24      | 15      | E    | 0           | 525607.472   | 0.187                      | 337.3306  |
| 40   | 25     | 16     | 39    | 24      | 15      | A    | 0           | 525642.936   | 0.112                      | 337.3389  |
| 40   | 25     | 15     | 39    | 24      | 16      | A    | 0           | 525642.936   | 0.112                      | 337.3389  |
| 40   | 25     | 16     | 39    | 24      | 16      | E    | 0           | 525651.856   | 0.142                      | 337.3254  |
| 52   | 19     | 33     | 51    | 18      | 33      | E    | 0           | 525814.923   | 0.009                      | 404.0235  |
| 52   | 19     | 34     | 51    | 18      | 34      | E    | 0           | 525832.736   | 0.045                      | 404.0121  |
| 52   | 19     | 34     | 51    | 18      | 33      | A    | 0           | 525854.830   | -0.274                     | 404.0218  |
| 52   | 19     | 33     | 51    | 18      | 34      | A    | 0           | 525869.366   | 0.273                      | 404.0214  |
| 42   | 24     | 18     | 41    | 23      | 19      | A    | 0           | 526336.735   | 0.082                      | 345.1691  |
| 42   | 24     | 19     | 41    | 23      | 18      | A    | 0           | 526336.735   | 0.082                      | 345.1691  |
| 42   | 24     | 19     | 41    | 23      | 19      | E    | 0           | 526339.896   | 0.132                      | 345.1557  |
| 44   | 23     | 22     | 43    | 22      | 22      | E    | 0           | 526909.295   | -0.030                     | 354.2584  |
| 44   | 23     | 22     | 43    | 22      | 21      | A    | 0           | 526912.323   | 0.139                      | 354.2716  |
| 44   | 23     | 21     | 43    | 22      | 22      | A    | 0           | 526912.323   | 0.139                      | 354.2716  |
| 50   | 20     | 30     | 49    | 19      | 30      | E    | 0           | 526983.888   | 0.102                      | 389.4880  |
| 50   | 20     | 31     | 49    | 19      | 31      | E    | 0           | 527008.507   | 0.050                      | 389.4770  |
| 50   | 20     | 30     | 49    | 19      | 31      | A    | 0           | 527030.711   | 0.043                      | 389.4880  |
| 46   | 22     | 24     | 45    | 21      | 24      | E    | 0           | 527258.737   | 0.113                      | 364.6655  |
| 46   | 22     | 25     | 45    | 21      | 25      | E    | 0           | 527293.918   | 0.192                      | 364.6564  |
| 46   | 22     | 24     | 45    | 21      | 25      | A    | 0           | 527302.813   | 0.077                      | 364.6691  |
| 46   | 22     | 25     | 45    | 21      | 24      | A    | 0           | 527302.813   | 0.077                      | 364.6691  |
| 48   | 21     | 27     | 47    | 20      | 27      | E    | 0           | 527356.126   | 0.061                      | 376.3911  |
| 48   | 21     | 28     | 47    | 20      | 28      | E    | 0           | 527386.584   | 0.130                      | 376.3810  |
| 48   | 21     | 28     | 47    | 20      | 27      | A    | 0           | 527401.957   | 0.131                      | 376.3930  |
| 48   | 21     | 27     | 47    | 20      | 28      | A    | 0           | 527401.957   | 0.128                      | 376.3930  |
| 31   | 30     | 2      | 30    | 29      | 2       | E    | 0           | 527616.726   | 0.057                      | 322.9434  |
| 31   | 30     | 1      | 30    | 29      | 2       | A    | 0           | 527629.291   | 0.258                      | 322.9564  |
| 31   | 30     | 2      | 30    | 29      | 1       | A    | 0           | 527629.291   | 0.258                      | 322.9564  |
| 55   | 18     | 38     | 54    | 17      | 37      | E    | 0           | 527646.703   | 0.217                      | 431.5829  |
| 31   | 30     | 1      | 30    | 29      | 1       | E    | 0           | 527662.626   | 0.194                      | 322.9461  |
| 55   | 18     | 38     | 54    | 17      | 37      | A    | 0           | 527835.974   | 0.076                      | 431.5831  |
| 55   | 18     | 37     | 54    | 17      | 37      | E    | 0           | 528010.219   | -0.150                     | 431.5829  |



| $J'$ | $K'_a$ | $K'_c$ | $J''$ | $K''_a$ | $K''_c$ | Sym. | $v_{tCH_3}$ | $\nu_{Obs.}$ | $\nu_{Obs.} - \nu_{Calc.}$ | $E_{low}$ |
|------|--------|--------|-------|---------|---------|------|-------------|--------------|----------------------------|-----------|
| 55   | 18     | 38     | 54    | 17      | 38      | E    | 0           | 528418.921   | -0.031                     | 431.5571  |
| 57   | 17     | 40     | 56    | 16      | 41      | E    | 0           | 528433.439   | -0.197                     | 449.8214  |
| 57   | 17     | 40     | 56    | 16      | 41      | A    | 0           | 528454.565   | -0.089                     | 449.8209  |
| 33   | 29     | 5      | 32    | 28      | 5       | E    | 0           | 528475.723   | 0.082                      | 325.0142  |
| 33   | 29     | 5      | 32    | 28      | 4       | A    | 0           | 528493.330   | 0.086                      | 325.0266  |
| 33   | 29     | 4      | 32    | 28      | 5       | A    | 0           | 528493.330   | 0.086                      | 325.0266  |
| 33   | 29     | 4      | 32    | 28      | 4       | E    | 0           | 528522.666   | 0.188                      | 325.0153  |
| 55   | 18     | 37     | 54    | 17      | 38      | A    | 0           | 528680.833   | 0.052                      | 431.5600  |
| 35   | 28     | 8      | 34    | 27      | 7       | E    | 0           | 529325.886   | 0.144                      | 328.3063  |
| 35   | 28     | 7      | 34    | 27      | 8       | A    | 0           | 529348.465   | 0.112                      | 328.3179  |
| 35   | 28     | 8      | 34    | 27      | 7       | A    | 0           | 529348.465   | 0.112                      | 328.3179  |
| 35   | 28     | 7      | 34    | 27      | 8       | E    | 0           | 529373.212   | 0.221                      | 328.3058  |
| 37   | 27     | 10     | 36    | 26      | 10      | E    | 0           | 530157.898   | 0.128                      | 332.8260  |
| 37   | 27     | 11     | 36    | 26      | 10      | A    | 0           | 530185.176   | 0.088                      | 332.8366  |
| 37   | 27     | 10     | 36    | 26      | 11      | A    | 0           | 530185.176   | 0.088                      | 332.8366  |
| 37   | 27     | 11     | 36    | 26      | 11      | E    | 0           | 530205.008   | 0.256                      | 332.8239  |
| 39   | 26     | 13     | 38    | 25      | 13      | E    | 0           | 530957.818   | -0.067                     | 338.5813  |
| 39   | 26     | 13     | 38    | 25      | 14      | A    | 0           | 530989.700   | 0.158                      | 338.5908  |
| 39   | 26     | 14     | 38    | 25      | 13      | A    | 0           | 530989.700   | 0.158                      | 338.5908  |
| 39   | 26     | 14     | 38    | 25      | 14      | E    | 0           | 531004.177   | 0.275                      | 338.5776  |
| 53   | 19     | 34     | 52    | 18      | 34      | E    | 0           | 531322.340   | 0.207                      | 414.9758  |
| 53   | 19     | 35     | 52    | 18      | 35      | E    | 0           | 531339.788   | 0.090                      | 414.9645  |
| 53   | 19     | 35     | 52    | 18      | 34      | A    | 0           | 531356.072   | 0.118                      | 414.9741  |
| 53   | 19     | 34     | 52    | 18      | 35      | A    | 0           | 531383.546   | 0.235                      | 414.9734  |
| 41   | 25     | 16     | 40    | 24      | 16      | E    | 0           | 531705.479   | 0.105                      | 345.5826  |
| 41   | 25     | 17     | 40    | 24      | 16      | A    | 0           | 531741.068   | 0.130                      | 345.5908  |
| 41   | 25     | 16     | 40    | 24      | 17      | A    | 0           | 531741.068   | 0.130                      | 345.5908  |
| 41   | 25     | 17     | 40    | 24      | 17      | E    | 0           | 531749.834   | 0.116                      | 345.5774  |
| 56   | 18     | 39     | 55    | 17      | 38      | E    | 0           | 532293.714   | 0.281                      | 443.2923  |
| 43   | 24     | 19     | 42    | 23      | 19      | E    | 0           | 532369.337   | 0.171                      | 353.8435  |
| 43   | 24     | 19     | 42    | 23      | 20      | A    | 0           | 532408.061   | -0.085                     | 353.8503  |
| 43   | 24     | 20     | 42    | 23      | 19      | A    | 0           | 532408.061   | -0.085                     | 353.8503  |
| 43   | 24     | 20     | 42    | 23      | 20      | E    | 0           | 532411.261   | 0.151                      | 353.8369  |
| 56   | 18     | 39     | 55    | 17      | 38      | A    | 0           | 532439.416   | 0.339                      | 443.2927  |
| 51   | 20     | 31     | 50    | 19      | 31      | E    | 0           | 532726.141   | 0.085                      | 399.9583  |
| 51   | 20     | 32     | 50    | 19      | 32      | E    | 0           | 532750.334   | 0.106                      | 399.9474  |
| 51   | 20     | 31     | 50    | 19      | 32      | A    | 0           | 532773.004   | -0.101                     | 399.9582  |
| 45   | 23     | 22     | 44    | 22      | 22      | E    | 0           | 532902.211   | 0.105                      | 363.3820  |
| 45   | 23     | 23     | 44    | 22      | 23      | E    | 0           | 532941.222   | 0.319                      | 363.3740  |
| 45   | 23     | 23     | 44    | 22      | 22      | A    | 0           | 532944.073   | 0.116                      | 363.3872  |
| 45   | 23     | 22     | 44    | 22      | 23      | A    | 0           | 532944.073   | 0.116                      | 363.3872  |
| 47   | 21     | 25     | 46    | 21      | 25      | E    | 0           | 533231.171   | 0.077                      | 374.2224  |
| 49   | 21     | 28     | 48    | 20      | 28      | E    | 0           | 533238.924   | 0.136                      | 386.3984  |
| 47   | 22     | 26     | 46    | 21      | 26      | E    | 0           | 533266.028   | 0.073                      | 374.2133  |
| 47   | 22     | 25     | 46    | 21      | 26      | A    | 0           | 533275.382   | 0.157                      | 374.2260  |
| 47   | 22     | 26     | 46    | 21      | 25      | A    | 0           | 533275.382   | 0.157                      | 374.2260  |
| 49   | 21     | 28     | 48    | 20      | 29      | A    | 0           | 533284.637   | 0.066                      | 386.4002  |
| 32   | 30     | 3      | 31    | 29      | 3       | E    | 0           | 533755.670   | 0.158                      | 329.3028  |
| 32   | 30     | 2      | 31    | 29      | 3       | A    | 0           | 533767.963   | 0.068                      | 329.3158  |
| 32   | 30     | 3      | 31    | 29      | 2       | A    | 0           | 533767.963   | 0.068                      | 329.3158  |
| 32   | 30     | 2      | 31    | 29      | 2       | E    | 0           | 533801.444   | 0.176                      | 329.3055  |
| 34   | 29     | 6      | 33    | 28      | 6       | E    | 0           | 534612.474   | 0.238                      | 331.7897  |
| 34   | 29     | 6      | 33    | 28      | 5       | A    | 0           | 534629.956   | 0.096                      | 331.8021  |
| 34   | 29     | 5      | 33    | 28      | 6       | A    | 0           | 534629.956   | 0.096                      | 331.8021  |
| 36   | 28     | 9      | 35    | 27      | 8       | E    | 0           | 535457.935   | 0.217                      | 335.4996  |
| 36   | 28     | 8      | 35    | 27      | 9       | A    | 0           | 535480.474   | 0.122                      | 335.5112  |
| 36   | 28     | 9      | 35    | 27      | 8       | A    | 0           | 535480.474   | 0.122                      | 335.5112  |
| 36   | 28     | 8      | 35    | 27      | 9       | E    | 0           | 535505.106   | 0.165                      | 335.4991  |
| 58   | 17     | 41     | 57    | 16      | 42      | E    | 0           | 536055.028   | 0.240                      | 462.0274  |
| 38   | 27     | 11     | 37    | 26      | 11      | E    | 0           | 536281.889   | 0.138                      | 340.4394  |
| 38   | 27     | 12     | 37    | 26      | 11      | A    | 0           | 536309.192   | 0.098                      | 340.4500  |
| 38   | 27     | 11     | 37    | 26      | 12      | A    | 0           | 536309.192   | 0.098                      | 340.4500  |
| 38   | 27     | 12     | 37    | 26      | 12      | E    | 0           | 536328.929   | 0.240                      | 340.4372  |
| 57   | 18     | 40     | 56    | 17      | 39      | E    | 0           | 536559.010   | -0.119                     | 455.2454  |
| 57   | 18     | 40     | 56    | 17      | 39      | A    | 0           | 536670.864   | 0.055                      | 455.2458  |
| 54   | 19     | 35     | 53    | 18      | 35      | E    | 0           | 536761.175   | 0.091                      | 426.1543  |
| 54   | 19     | 36     | 53    | 18      | 36      | E    | 0           | 536780.054   | 0.223                      | 426.1429  |
| 54   | 19     | 36     | 53    | 18      | 35      | A    | 0           | 536783.529   | 0.126                      | 426.1527  |
| 54   | 19     | 35     | 53    | 18      | 36      | A    | 0           | 536835.990   | 0.094                      | 426.1512  |
| 40   | 26     | 14     | 39    | 25      | 14      | E    | 0           | 537069.217   | 0.133                      | 346.6174  |
| 40   | 26     | 14     | 39    | 25      | 15      | A    | 0           | 537100.879   | 0.111                      | 346.6269  |
| 40   | 26     | 15     | 39    | 25      | 14      | A    | 0           | 537100.879   | 0.111                      | 346.6269  |
| 40   | 26     | 15     | 39    | 25      | 15      | E    | 0           | 537115.229   | 0.193                      | 346.6137  |
| 64   | 18     | 47     | 63    | 17      | 46      | E    | 0           | 537708.447   | 0.175                      | 546.3899  |
| 42   | 25     | 17     | 41    | 24      | 17      | E    | 0           | 537797.184   | 0.181                      | 354.0449  |
| 42   | 25     | 18     | 41    | 24      | 17      | A    | 0           | 537832.715   | 0.122                      | 354.0530  |
| 42   | 25     | 17     | 41    | 24      | 18      | A    | 0           | 537832.715   | 0.122                      | 354.0530  |
| 42   | 25     | 18     | 41    | 24      | 18      | E    | 0           | 537841.417   | 0.165                      | 354.0396  |
| 52   | 20     | 32     | 51    | 19      | 32      | E    | 0           | 538427.807   | -0.042                     | 410.6496  |
| 44   | 24     | 20     | 43    | 23      | 20      | E    | 0           | 538431.570   | 0.067                      | 362.7362  |
| 52   | 20     | 33     | 51    | 19      | 33      | E    | 0           | 538451.687   | 0.207                      | 410.6388  |
| 44   | 24     | 20     | 43    | 23      | 21      | A    | 0           | 538470.628   | 0.119                      | 362.7430  |
| 44   | 24     | 21     | 43    | 23      | 20      | A    | 0           | 538470.628   | 0.119                      | 362.7430  |
| 46   | 23     | 23     | 45    | 22      | 23      | E    | 0           | 538921.141   | 0.155                      | 372.7107  |
| 46   | 23     | 24     | 45    | 22      | 24      | E    | 0           | 538959.780   | 0.183                      | 372.7028  |
| 46   | 23     | 24     | 45    | 22      | 23      | A    | 0           | 538963.012   | 0.150                      | 372.7159  |
| 46   | 23     | 23     | 45    | 22      | 24      | A    | 0           | 538963.012   | 0.150                      | 372.7159  |
| 31   | 31     | 1      | 30    | 30      | 1       | E    | 0           | 539033.663   | 0.218                      | 334.1851  |
| 31   | 31     | 1      | 30    | 30      | 0       | A    | 0           | 539040.569   | 0.124                      | 334.1985  |
| 31   | 31     | 0      | 30    | 30      | 1       | A    | 0           | 539040.569   | 0.124                      | 334.1985  |
| 31   | 31     | 0      | 30    | 30      | 0       | E    | 0           | 539077.605   | 0.108                      | 334.1893  |
| 50   | 21     | 29     | 49    | 20      | 29      | E    | 0           | 539095.215   | 0.291                      | 396.6233  |
| 50   | 21     | 30     | 49    | 20      | 30      | E    | 0           | 539124.681   | 0.079                      | 396.6131  |
| 50   | 21     | 29     | 49    | 20      | 30      | A    | 0           | 539140.733   | -0.001                     | 396.6249  |
| 57   | 18     | 39     | 56    | 17      | 40      | A    | 0           | 539183.333   | -0.227                     | 455.1782  |
| 48   | 22     | 26     | 47    | 21      | 26      | E    | 0           | 539185.593   | 0.317                      | 383.9944  |
| 57   | 18     | 39     | 56    | 17      | 40      | E    | 0           | 539203.118   | -0.379                     | 455.1767  |
| 48   | 22     | 27     | 47    | 21      | 27      | E    | 0           | 539219.888   | 0.012                      | 383.9852  |
| 48   | 22     | 26     | 47    | 21      | 27      | A    | 0           | 539229.536   | 0.105                      | 383.9978  |
| 48   | 22     | 27     | 47    | 21      | 26      | A    | 0           | 539229.536   | 0.105                      | 383.9978  |
| 33   | 30     | 4      | 32    | 29      | 4       | E    | 0           | 539893.783   | 0.200                      | 335.8691  |
| 33   | 30     | 3      | 32    | 29      | 4       | A    | 0           | 539906.117   | 0.132                      | 335.8821  |
| 33   | 30     | 4      | 32    | 29      | 3       | A    | 0           | 539906.117   | 0.132                      | 335.8821  |
| 33   | 30     | 3      | 32    | 29      | 3       | E    | 0           | 539939.499   | 0.168                      | 335.8718  |
| 58   | 18     | 41     | 57    | 17      | 40      | E    | 0           | 540292.191   | 0.090                      | 467.4481  |
| 58   | 18     | 41     | 57    | 17      | 40      | A    | 0           | 540382.997   | 0.157                      | 467.4483  |
| 35   | 29     | 7      | 34    | 28      | 7       | E    | 0           | 540747.635   | 0.213                      | 338.7725  |
| 35   | 29     | 7      | 34    | 28      | 6       | A    | 0           | 540765.181   | 0.112                      | 338.7849  |
| 35   | 29     | 6      | 34    | 28      | 7       | A    | 0           | 540765.181   | 0.112                      | 338.7849  |
| 35   | 29     | 6      | 34    | 28      | 6       | E    | 0           | 540794.447   | 0.220                      | 338.7736  |
| 37   | 28     | 10     | 36    | 27      | 9       | E    | 0           | 541587.600   | 0.171                      | 342.9009  |
| 37   | 28     | 9      | 36    | 27      | 10      | A    | 0           | 541610.218   | 0.129                      | 342.9124  |
| 37   | 28     | 10     | 36    | 27      | 9       | A    | 0           | 541610.218   | 0.129                      | 342.9124  |
| 37   | 28     | 9      | 36    | 27      | 10      | E    | 0           | 541634.770   | 0.149                      | 342.9003  |
| 55   | 19     | 36     | 54    | 18      | 36      | E    | 0           | 542122.165   | 0.067                      | 437.5602  |
| 55   | 19     | 37     | 54    | 18      | 36      | A    | 0           | 542124.783   | -0.000                     | 437.5591  |



| $J'$ | $K'_a$ | $K'_c$ | $J''$ | $K''_a$ | $K''_c$ | Sym. | $v_{tCH_3}$ | $\nu_{Obs.}$ | $\nu_{Obs.} - \nu_{Calc.}$ | $E_{low}$ |
|------|--------|--------|-------|---------|---------|------|-------------|--------------|----------------------------|-----------|
| 55   | 19     | 37     | 54    | 18      | 37      | E    | 0           | 542147.140   | 0.252                      | 437.5488  |
| 55   | 19     | 36     | 54    | 18      | 37      | A    | 0           | 542223.772   | 0.112                      | 437.5563  |
| 63   | 18     | 46     | 62    | 17      | 45      | E    | 0           | 542340.796   | 0.075                      | 532.5139  |
| 39   | 27     | 12     | 38    | 26      | 12      | E    | 0           | 542402.456   | 0.137                      | 348.2613  |
| 39   | 27     | 13     | 38    | 26      | 12      | A    | 0           | 542429.933   | 0.243                      | 348.2719  |
| 39   | 27     | 12     | 38    | 26      | 13      | A    | 0           | 542429.933   | 0.243                      | 348.2719  |
| 39   | 27     | 13     | 38    | 26      | 13      | E    | 0           | 542449.424   | 0.215                      | 348.2592  |
| 41   | 26     | 15     | 40    | 25      | 15      | E    | 0           | 543175.444   | 0.112                      | 354.8630  |
| 41   | 26     | 15     | 40    | 25      | 16      | A    | 0           | 543207.094   | 0.050                      | 354.8724  |
| 41   | 26     | 16     | 40    | 25      | 15      | A    | 0           | 543207.094   | 0.050                      | 354.8724  |
| 41   | 26     | 16     | 40    | 25      | 16      | E    | 0           | 543221.331   | 0.118                      | 354.8593  |
| 43   | 25     | 19     | 42    | 24      | 18      | A    | 0           | 543917.337   | 0.114                      | 362.7258  |
| 43   | 25     | 18     | 42    | 24      | 19      | A    | 0           | 543917.337   | 0.114                      | 362.7258  |
| 43   | 25     | 19     | 42    | 24      | 19      | E    | 0           | 543925.960   | 0.211                      | 362.7125  |
| 53   | 20     | 34     | 52    | 19      | 34      | E    | 0           | 544108.416   | -0.066                     | 421.5520  |
| 53   | 20     | 34     | 52    | 19      | 33      | A    | 0           | 544131.143   | 0.089                      | 421.5625  |
| 53   | 20     | 33     | 52    | 19      | 34      | A    | 0           | 544133.634   | 0.163                      | 421.5624  |
| 45   | 24     | 21     | 44    | 23      | 21      | E    | 0           | 544484.112   | 0.148                      | 371.8409  |
| 45   | 24     | 21     | 44    | 23      | 22      | A    | 0           | 544523.065   | 0.066                      | 371.8475  |
| 45   | 24     | 22     | 44    | 23      | 21      | A    | 0           | 544523.065   | 0.066                      | 371.8475  |
| 45   | 24     | 22     | 44    | 23      | 22      | E    | 0           | 544525.780   | 0.150                      | 371.8342  |
| 58   | 18     | 40     | 57    | 17      | 41      | E    | 0           | 544580.802   | 0.130                      | 467.3353  |
| 58   | 18     | 40     | 57    | 17      | 41      | A    | 0           | 544584.727   | 0.168                      | 467.3363  |
| 51   | 21     | 30     | 50    | 20      | 30      | E    | 0           | 544922.307   | 0.002                      | 407.0663  |
| 47   | 23     | 24     | 46    | 22      | 24      | E    | 0           | 544926.253   | 0.258                      | 382.2530  |
| 51   | 21     | 31     | 50    | 20      | 31      | E    | 0           | 544951.710   | 0.126                      | 407.0562  |
| 47   | 23     | 25     | 46    | 22      | 25      | E    | 0           | 544964.505   | 0.100                      | 382.2450  |
| 51   | 21     | 31     | 50    | 20      | 30      | A    | 0           | 544968.123   | 0.011                      | 407.0678  |
| 47   | 23     | 25     | 46    | 22      | 24      | A    | 0           | 544968.123   | 0.223                      | 382.2581  |
| 47   | 23     | 24     | 46    | 22      | 25      | A    | 0           | 544968.123   | 0.223                      | 382.2581  |
| 49   | 22     | 27     | 48    | 21      | 27      | E    | 0           | 545119.482   | -0.270                     | 393.9818  |
| 49   | 22     | 28     | 48    | 21      | 28      | E    | 0           | 545154.244   | 0.173                      | 393.9727  |
| 49   | 22     | 27     | 48    | 21      | 28      | A    | 0           | 545164.093   | 0.161                      | 393.9852  |
| 49   | 22     | 28     | 48    | 21      | 27      | A    | 0           | 545164.093   | 0.161                      | 393.9852  |
| 32   | 31     | 2      | 31    | 30      | 2       | E    | 0           | 545172.378   | 0.236                      | 340.5427  |
| 32   | 31     | 2      | 31    | 30      | 1       | A    | 0           | 545179.147   | -0.014                     | 340.5562  |
| 32   | 31     | 1      | 31    | 30      | 2       | A    | 0           | 545179.147   | -0.014                     | 340.5562  |
| 32   | 31     | 1      | 31    | 30      | 1       | E    | 0           | 545216.467   | 0.276                      | 340.5470  |
| 60   | 18     | 43     | 59    | 17      | 42      | E    | 0           | 545292.357   | 0.342                      | 492.6351  |
| 60   | 18     | 43     | 59    | 17      | 42      | A    | 0           | 545372.352   | 0.019                      | 492.6345  |
| 34   | 30     | 5      | 33    | 29      | 5       | E    | 0           | 546030.781   | 0.081                      | 342.6422  |
| 34   | 30     | 4      | 33    | 29      | 5       | A    | 0           | 546043.236   | 0.113                      | 342.6552  |
| 34   | 30     | 5      | 33    | 29      | 4       | A    | 0           | 546043.236   | 0.113                      | 342.6552  |
| 34   | 30     | 4      | 33    | 29      | 4       | E    | 0           | 546076.813   | 0.375                      | 342.6449  |
| 36   | 29     | 8      | 35    | 28      | 8       | E    | 0           | 546881.114   | 0.143                      | 345.9627  |
| 36   | 29     | 8      | 35    | 28      | 7       | A    | 0           | 546898.812   | 0.170                      | 345.9751  |
| 36   | 29     | 7      | 35    | 28      | 8       | A    | 0           | 546898.812   | 0.170                      | 345.9751  |
| 36   | 29     | 7      | 35    | 28      | 7       | E    | 0           | 546927.983   | 0.228                      | 345.9638  |
| 56   | 19     | 38     | 55    | 18      | 37      | A    | 0           | 547362.475   | -0.053                     | 449.1948  |
| 56   | 19     | 37     | 55    | 18      | 37      | E    | 0           | 547362.475   | -0.053                     | 449.1948  |
| 56   | 19     | 38     | 55    | 18      | 38      | E    | 0           | 547436.622   | -0.034                     | 449.1833  |
| 56   | 19     | 37     | 55    | 18      | 38      | A    | 0           | 547545.656   | 0.271                      | 449.1898  |
| 38   | 28     | 11     | 37    | 27      | 10      | E    | 0           | 547714.729   | 0.143                      | 350.5102  |
| 38   | 28     | 10     | 37    | 27      | 11      | A    | 0           | 547737.330   | 0.057                      | 350.5217  |
| 38   | 28     | 11     | 37    | 27      | 10      | A    | 0           | 547737.330   | 0.057                      | 350.5217  |
| 38   | 28     | 10     | 37    | 27      | 11      | E    | 0           | 547761.833   | 0.090                      | 350.5096  |
| 40   | 27     | 13     | 39    | 26      | 13      | E    | 0           | 548519.166   | 0.057                      | 356.2922  |
| 40   | 27     | 14     | 39    | 26      | 13      | A    | 0           | 548546.438   | -0.071                     | 356.3027  |
| 40   | 27     | 13     | 39    | 26      | 14      | A    | 0           | 548546.438   | -0.071                     | 356.3027  |
| 40   | 27     | 14     | 39    | 26      | 14      | E    | 0           | 548565.994   | 0.049                      | 356.2900  |
| 42   | 26     | 16     | 41    | 25      | 16      | E    | 0           | 549276.225   | 0.060                      | 363.3184  |
| 42   | 26     | 16     | 41    | 25      | 17      | A    | 0           | 549308.042   | 0.133                      | 363.3278  |
| 42   | 26     | 17     | 41    | 25      | 16      | A    | 0           | 549308.042   | 0.133                      | 363.3278  |
| 42   | 26     | 17     | 41    | 25      | 17      | E    | 0           | 549322.195   | 0.228                      | 363.3147  |
| 44   | 25     | 20     | 43    | 24      | 19      | A    | 0           | 549994.284   | 0.053                      | 371.6095  |
| 44   | 25     | 19     | 43    | 24      | 20      | A    | 0           | 549994.284   | 0.053                      | 371.6095  |
| 44   | 25     | 20     | 43    | 24      | 20      | E    | 0           | 550002.484   | -0.129                     | 371.5962  |
| 46   | 24     | 22     | 45    | 23      | 22      | E    | 0           | 550526.018   | 0.249                      | 381.1577  |
| 46   | 24     | 22     | 45    | 23      | 23      | A    | 0           | 550564.922   | 0.085                      | 381.1643  |
| 46   | 24     | 23     | 45    | 23      | 22      | A    | 0           | 550564.922   | 0.085                      | 381.1643  |
| 46   | 24     | 23     | 45    | 23      | 23      | E    | 0           | 550567.373   | 0.093                      | 381.1510  |
| 52   | 21     | 31     | 51    | 20      | 31      | E    | 0           | 550718.899   | 0.332                      | 417.7282  |
| 52   | 21     | 32     | 51    | 20      | 32      | E    | 0           | 550747.619   | 0.203                      | 417.7181  |
| 52   | 21     | 31     | 51    | 20      | 32      | A    | 0           | 550764.467   | 0.001                      | 417.7296  |
| 48   | 23     | 25     | 47    | 22      | 25      | E    | 0           | 550915.982   | -0.087                     | 392.0091  |
| 48   | 23     | 26     | 47    | 22      | 26      | E    | 0           | 550954.305   | 0.041                      | 392.0011  |
| 48   | 23     | 26     | 47    | 22      | 25      | A    | 0           | 550958.161   | 0.155                      | 392.0141  |
| 48   | 23     | 25     | 47    | 22      | 26      | A    | 0           | 550958.161   | 0.155                      | 392.0141  |
| 50   | 22     | 28     | 49    | 21      | 28      | E    | 0           | 551033.199   | 0.202                      | 404.1854  |
| 50   | 22     | 29     | 49    | 21      | 29      | E    | 0           | 551067.050   | 0.035                      | 404.1762  |
| 50   | 22     | 28     | 49    | 21      | 29      | A    | 0           | 551077.234   | 0.025                      | 404.1886  |
| 50   | 22     | 29     | 49    | 21      | 28      | A    | 0           | 551077.234   | 0.026                      | 404.1886  |
| 33   | 31     | 3      | 32    | 30      | 3       | E    | 0           | 551310.412   | 0.172                      | 347.1070  |
| 33   | 31     | 3      | 32    | 30      | 2       | A    | 0           | 551317.395   | 0.116                      | 347.1204  |
| 33   | 31     | 2      | 32    | 30      | 3       | A    | 0           | 551317.395   | 0.116                      | 347.1204  |
| 33   | 31     | 2      | 32    | 30      | 2       | E    | 0           | 551354.545   | 0.259                      | 347.1112  |
| 35   | 30     | 6      | 34    | 29      | 6       | E    | 0           | 552166.832   | 0.160                      | 349.6224  |
| 35   | 30     | 5      | 34    | 29      | 6       | A    | 0           | 552179.314   | 0.195                      | 349.6354  |
| 35   | 30     | 6      | 34    | 29      | 5       | A    | 0           | 552179.314   | 0.195                      | 349.6354  |
| 35   | 30     | 5      | 34    | 29      | 5       | E    | 0           | 552212.494   | 0.095                      | 349.6251  |
| 57   | 19     | 38     | 56    | 18      | 39      | A    | 0           | 552803.605   | 0.026                      | 461.0530  |
| 37   | 29     | 9      | 36    | 28      | 9       | E    | 0           | 553012.848   | 0.207                      | 353.3606  |
| 37   | 29     | 9      | 36    | 28      | 8       | A    | 0           | 553030.370   | 0.032                      | 353.3729  |
| 37   | 29     | 8      | 36    | 28      | 9       | A    | 0           | 553030.370   | 0.032                      | 353.3729  |
| 37   | 29     | 8      | 36    | 28      | 8       | E    | 0           | 553059.640   | 0.239                      | 353.3617  |
| 39   | 28     | 12     | 38    | 27      | 11      | E    | 0           | 553839.079   | 0.193                      | 358.3278  |
| 39   | 28     | 11     | 38    | 27      | 12      | A    | 0           | 553861.666   | 0.063                      | 358.3393  |
| 39   | 28     | 12     | 38    | 27      | 11      | A    | 0           | 553861.666   | 0.063                      | 358.3393  |
| 39   | 28     | 11     | 38    | 27      | 12      | E    | 0           | 553886.178   | 0.174                      | 358.3272  |
| 41   | 27     | 14     | 40    | 26      | 14      | E    | 0           | 554631.902   | 0.163                      | 364.5321  |
| 41   | 27     | 15     | 40    | 26      | 14      | A    | 0           | 554659.273   | 0.101                      | 364.5426  |
| 41   | 27     | 14     | 40    | 26      | 15      | A    | 0           | 554659.273   | 0.101                      | 364.5426  |
| 41   | 27     | 15     | 40    | 26      | 15      | E    | 0           | 554678.671   | 0.154                      | 364.5299  |
| 55   | 20     | 35     | 54    | 19      | 35      | E    | 0           | 555250.598   | -0.077                     | 444.0587  |
| 55   | 20     | 36     | 54    | 19      | 36      | E    | 0           | 555272.722   | 0.232                      | 444.0480  |
| 55   | 20     | 36     | 54    | 19      | 35      | A    | 0           | 555292.748   | -0.034                     | 444.0582  |
| 55   | 20     | 35     | 54    | 19      | 36      | A    | 0           | 555302.518   | 0.014                      | 444.0579  |
| 43   | 26     | 17     | 42    | 25      | 17      | E    | 0           | 555371.250   | 0.149                      | 371.9838  |
| 43   | 26     | 18     | 42    | 25      | 18      | E    | 0           | 555416.869   | 0.050                      | 371.9801  |
| 45   | 25     | 20     | 44    | 24      | 20      | E    | 0           | 556027.538   | 0.230                      | 380.6964  |
| 45   | 25     | 21     | 44    | 24      | 20      | A    | 0           | 556063.089   | 0.094                      | 380.7044  |
| 45   | 25     | 20     | 44    | 24      | 21      | A    | 0           | 556063.089   | 0.094                      | 380.7044  |
| 45   | 25     | 21     | 44    | 24      | 21      | E    | 0           | 556071.322   | 0.100                      | 380.6911  |
| 53   | 21     | 32     | 52    | 20      | 32      | E    | 0           | 556481.240   | 0.117                      | 428.6097  |
| 53   | 21     | 33     | 52    | 20      | 33      | E    | 0           | 556509.442   | -0.069                     | 428.5996  |
| 53   | 21     | 32     | 52    | 20      | 33      | A    | 0           | 556527.212   | 0.104                      | 428.6110  |



| $J'$ | $K'_a$ | $K'_c$ | $J''$ | $K''_a$ | $K''_c$ | Sym. | $v_{tCH_3}$ | $\nu_{Obs.}$ | $\nu_{Obs.} - \nu_{Calc.}$ | $E_{low}$ |
|------|--------|--------|-------|---------|---------|------|-------------|--------------|----------------------------|-----------|
| 47   | 24     | 23     | 46    | 23      | 23      | E    | 0           | 556556.284   | 0.190                      | 390.6872  |
| 32   | 32     | 1      | 31    | 31      | 1       | E    | 0           | 556587.627   | -0.297                     | 352.1653  |
| 32   | 32     | 0      | 31    | 31      | 1       | A    | 0           | 556589.782   | 0.295                      | 352.1789  |
| 32   | 32     | 1      | 31    | 31      | 0       | A    | 0           | 556589.782   | 0.295                      | 352.1789  |
| 47   | 24     | 23     | 46    | 23      | 24      | A    | 0           | 556595.291   | 0.093                      | 390.6938  |
| 47   | 24     | 24     | 46    | 23      | 23      | A    | 0           | 556595.291   | 0.093                      | 390.6938  |
| 47   | 24     | 24     | 46    | 23      | 24      | E    | 0           | 556597.702   | 0.264                      | 390.6805  |
| 32   | 32     | 0      | 31    | 31      | 0       | E    | 0           | 556629.828   | 0.152                      | 352.1710  |
| 49   | 23     | 26     | 48    | 22      | 26      | E    | 0           | 556890.064   | -0.017                     | 401.9797  |
| 51   | 22     | 30     | 50    | 21      | 30      | E    | 0           | 556957.233   | 0.161                      | 414.5964  |
| 51   | 22     | 29     | 50    | 21      | 30      | A    | 0           | 556967.724   | 0.099                      | 414.6087  |
| 51   | 22     | 30     | 50    | 21      | 29      | A    | 0           | 556967.724   | 0.101                      | 414.6087  |
| 58   | 19     | 40     | 57    | 18      | 39      | A    | 0           | 557415.276   | 0.119                      | 473.1634  |
| 34   | 31     | 4      | 33    | 30      | 4       | E    | 0           | 557447.824   | 0.244                      | 353.8780  |
| 34   | 31     | 4      | 33    | 30      | 3       | A    | 0           | 557454.799   | 0.158                      | 353.8914  |
| 34   | 31     | 3      | 33    | 30      | 4       | A    | 0           | 557454.799   | 0.158                      | 353.8914  |
| 34   | 31     | 3      | 33    | 30      | 3       | E    | 0           | 557491.817   | 0.197                      | 353.8822  |
| 58   | 19     | 39     | 57    | 18      | 40      | A    | 0           | 558007.342   | 0.110                      | 473.1472  |
| 36   | 30     | 7      | 35    | 29      | 7       | E    | 0           | 558301.642   | 0.344                      | 356.8099  |
| 36   | 30     | 6      | 35    | 29      | 7       | A    | 0           | 558313.800   | 0.030                      | 356.8228  |
| 36   | 30     | 7      | 35    | 29      | 6       | A    | 0           | 558313.800   | 0.030                      | 356.8228  |
| 36   | 30     | 6      | 35    | 29      | 6       | E    | 0           | 558347.077   | 0.067                      | 356.8125  |
| 38   | 29     | 10     | 37    | 28      | 10      | E    | 0           | 559142.288   | 0.109                      | 360.9663  |
| 38   | 29     | 10     | 37    | 28      | 9       | A    | 0           | 559160.070   | 0.164                      | 360.9786  |
| 38   | 29     | 9      | 37    | 28      | 10      | A    | 0           | 559160.070   | 0.164                      | 360.9786  |
| 38   | 29     | 9      | 37    | 28      | 9       | E    | 0           | 559189.007   | 0.094                      | 360.9673  |
| 40   | 28     | 13     | 39    | 27      | 12      | E    | 0           | 559960.012   | 0.000                      | 366.3539  |
| 40   | 28     | 12     | 39    | 27      | 13      | A    | 0           | 559982.860   | 0.100                      | 366.3654  |
| 40   | 28     | 13     | 39    | 27      | 12      | A    | 0           | 559982.860   | 0.100                      | 366.3654  |
| 40   | 28     | 12     | 39    | 27      | 13      | E    | 0           | 560007.214   | 0.127                      | 366.3534  |
| 42   | 27     | 15     | 41    | 26      | 15      | E    | 0           | 560739.992   | 0.179                      | 372.9814  |
| 56   | 20     | 36     | 55    | 19      | 36      | E    | 0           | 560748.316   | 0.179                      | 455.6435  |
| 42   | 27     | 16     | 41    | 26      | 15      | A    | 0           | 560767.376   | 0.096                      | 372.9919  |
| 42   | 27     | 15     | 41    | 26      | 16      | A    | 0           | 560767.376   | 0.096                      | 372.9919  |
| 56   | 20     | 37     | 55    | 19      | 37      | E    | 0           | 560769.818   | 0.330                      | 455.6328  |
| 42   | 27     | 16     | 41    | 26      | 16      | E    | 0           | 560786.380   | -0.146                     | 372.9792  |
| 56   | 20     | 36     | 55    | 19      | 37      | A    | 0           | 560804.977   | 0.177                      | 455.6424  |
| 44   | 26     | 18     | 43    | 25      | 18      | E    | 0           | 561459.752   | 0.121                      | 380.8596  |
| 44   | 26     | 18     | 43    | 25      | 19      | A    | 0           | 561491.580   | 0.134                      | 380.8690  |
| 44   | 26     | 19     | 43    | 25      | 18      | A    | 0           | 561491.580   | 0.134                      | 380.8690  |
| 44   | 26     | 19     | 43    | 25      | 19      | E    | 0           | 561505.308   | 0.052                      | 380.8559  |
| 46   | 25     | 21     | 45    | 24      | 21      | E    | 0           | 562087.183   | 0.048                      | 390.0029  |
| 46   | 25     | 22     | 45    | 24      | 21      | A    | 0           | 562122.966   | 0.105                      | 390.0109  |
| 46   | 25     | 21     | 45    | 24      | 22      | A    | 0           | 562122.966   | 0.105                      | 390.0109  |
| 46   | 25     | 22     | 45    | 24      | 22      | E    | 0           | 562130.898   | -0.021                     | 389.9976  |
| 59   | 19     | 41     | 58    | 18      | 40      | A    | 0           | 562139.828   | 0.347                      | 485.5017  |
| 54   | 21     | 33     | 53    | 20      | 33      | E    | 0           | 562207.334   | 0.203                      | 439.7116  |
| 54   | 21     | 34     | 53    | 20      | 34      | E    | 0           | 562235.142   | 0.121                      | 439.7015  |
| 54   | 21     | 33     | 53    | 20      | 34      | A    | 0           | 562253.253   | -0.011                     | 439.7128  |
| 48   | 24     | 24     | 47    | 23      | 24      | E    | 0           | 562574.075   | 0.003                      | 400.4297  |
| 48   | 24     | 24     | 47    | 23      | 25      | A    | 0           | 562613.219   | 0.004                      | 400.4362  |
| 48   | 24     | 25     | 47    | 23      | 24      | A    | 0           | 562613.219   | 0.004                      | 400.4362  |
| 48   | 24     | 25     | 47    | 23      | 25      | E    | 0           | 562615.504   | 0.268                      | 400.4230  |
| 33   | 32     | 2      | 32    | 31      | 2       | E    | 0           | 562725.588   | -0.260                     | 358.7277  |
| 33   | 32     | 1      | 32    | 31      | 2       | A    | 0           | 562727.712   | 0.281                      | 358.7414  |
| 33   | 32     | 2      | 32    | 31      | 1       | A    | 0           | 562727.712   | 0.281                      | 358.7414  |
| 33   | 32     | 1      | 32    | 31      | 1       | E    | 0           | 562767.598   | -0.001                     | 358.7334  |
| 52   | 22     | 30     | 51    | 21      | 30      | E    | 0           | 562789.136   | 0.000                      | 425.2429  |
| 52   | 22     | 31     | 51    | 21      | 31      | E    | 0           | 562822.655   | 0.173                      | 425.2338  |
| 52   | 22     | 30     | 51    | 21      | 31      | A    | 0           | 562833.569   | 0.146                      | 425.2460  |
| 52   | 22     | 31     | 51    | 21      | 30      | A    | 0           | 562833.569   | 0.151                      | 425.2460  |
| 50   | 23     | 27     | 49    | 22      | 27      | E    | 0           | 562846.912   | 0.079                      | 412.1651  |
| 50   | 23     | 28     | 49    | 22      | 28      | E    | 0           | 562884.549   | 0.003                      | 412.1571  |
| 50   | 23     | 28     | 49    | 22      | 27      | A    | 0           | 562888.921   | 0.078                      | 412.1699  |
| 50   | 23     | 27     | 49    | 22      | 28      | A    | 0           | 562888.921   | 0.078                      | 412.1699  |
| 35   | 31     | 5      | 34    | 30      | 5       | E    | 0           | 563584.110   | 0.115                      | 360.8559  |
| 35   | 31     | 5      | 34    | 30      | 4       | A    | 0           | 563591.184   | 0.106                      | 360.8693  |
| 35   | 31     | 4      | 34    | 30      | 5       | A    | 0           | 563591.184   | 0.106                      | 360.8693  |
| 35   | 31     | 4      | 34    | 30      | 4       | E    | 0           | 563628.159   | 0.131                      | 360.8601  |
| 37   | 30     | 8      | 36    | 29      | 8       | E    | 0           | 564434.525   | 0.160                      | 364.2047  |
| 37   | 30     | 7      | 36    | 29      | 8       | A    | 0           | 564446.913   | 0.047                      | 364.2177  |
| 37   | 30     | 8      | 36    | 29      | 7       | A    | 0           | 564446.913   | 0.047                      | 364.2177  |
| 37   | 30     | 7      | 36    | 29      | 7       | E    | 0           | 564480.164   | 0.103                      | 364.2074  |
| 39   | 29     | 11     | 38    | 28      | 11      | E    | 0           | 565269.363   | 0.044                      | 368.7800  |
| 39   | 29     | 11     | 38    | 28      | 10      | A    | 0           | 565287.234   | 0.157                      | 368.7923  |
| 39   | 29     | 10     | 38    | 28      | 11      | A    | 0           | 565287.234   | 0.157                      | 368.7923  |
| 39   | 29     | 10     | 38    | 28      | 10      | E    | 0           | 565316.176   | 0.152                      | 368.7810  |
| 41   | 28     | 14     | 40    | 27      | 13      | E    | 0           | 566077.815   | 0.185                      | 374.5888  |
| 41   | 28     | 13     | 40    | 27      | 14      | A    | 0           | 566100.550   | 0.135                      | 374.6003  |
| 41   | 28     | 14     | 40    | 27      | 13      | A    | 0           | 566100.550   | 0.135                      | 374.6003  |
| 41   | 28     | 13     | 40    | 27      | 14      | E    | 0           | 566124.692   | 0.032                      | 374.5882  |
| 57   | 20     | 37     | 56    | 19      | 37      | E    | 0           | 566180.602   | 0.034                      | 467.4544  |
| 57   | 20     | 38     | 56    | 19      | 38      | E    | 0           | 566202.283   | 0.144                      | 467.4438  |
| 57   | 20     | 38     | 56    | 19      | 37      | A    | 0           | 566210.269   | 0.115                      | 467.4539  |
| 60   | 19     | 42     | 59    | 18      | 41      | E    | 0           | 566443.160   | 0.090                      | 498.0798  |
| 60   | 19     | 42     | 59    | 18      | 41      | A    | 0           | 566565.108   | -0.038                     | 498.0811  |
| 43   | 27     | 16     | 42    | 26      | 16      | E    | 0           | 566843.032   | 0.122                      | 381.6403  |
| 43   | 27     | 17     | 42    | 26      | 16      | A    | 0           | 566870.487   | 0.071                      | 381.6507  |
| 43   | 27     | 16     | 42    | 26      | 17      | A    | 0           | 566870.487   | 0.071                      | 381.6507  |
| 43   | 27     | 17     | 42    | 26      | 17      | E    | 0           | 566889.788   | 0.234                      | 381.6381  |
| 45   | 26     | 19     | 44    | 25      | 19      | E    | 0           | 567541.356   | 0.130                      | 389.9461  |
| 45   | 26     | 19     | 44    | 25      | 20      | A    | 0           | 567573.185   | 0.104                      | 389.9554  |
| 45   | 26     | 20     | 44    | 25      | 19      | A    | 0           | 567573.185   | 0.104                      | 389.9554  |
| 45   | 26     | 20     | 44    | 25      | 20      | E    | 0           | 567586.955   | 0.204                      | 389.9423  |
| 55   | 21     | 34     | 54    | 20      | 34      | E    | 0           | 567893.664   | 0.213                      | 451.0347  |
| 55   | 21     | 35     | 54    | 20      | 35      | E    | 0           | 567920.864   | 0.060                      | 451.0247  |
| 55   | 21     | 34     | 54    | 20      | 35      | A    | 0           | 567939.562   | -0.287                     | 451.0357  |
| 47   | 25     | 22     | 46    | 24      | 22      | E    | 0           | 568137.588   | 0.216                      | 399.5213  |
| 47   | 25     | 23     | 46    | 24      | 22      | A    | 0           | 568173.281   | 0.140                      | 399.5292  |
| 47   | 25     | 22     | 46    | 24      | 23      | A    | 0           | 568173.281   | 0.140                      | 399.5292  |
| 47   | 25     | 23     | 46    | 24      | 23      | E    | 0           | 568181.072   | 0.055                      | 399.5160  |
| 60   | 19     | 41     | 59    | 18      | 42      | A    | 0           | 568346.094   | 0.071                      | 498.0330  |
| 60   | 19     | 41     | 59    | 18      | 42      | E    | 0           | 568380.253   | 0.000                      | 498.0304  |
| 49   | 24     | 25     | 48    | 23      | 25      | E    | 0           | 568578.867   | 0.081                      | 410.3857  |
| 49   | 24     | 25     | 48    | 23      | 26      | A    | 0           | 568617.935   | -0.037                     | 410.3921  |
| 49   | 24     | 26     | 48    | 23      | 25      | A    | 0           | 568617.935   | -0.037                     | 410.3921  |
| 49   | 24     | 26     | 48    | 23      | 26      | E    | 0           | 568620.176   | 0.420                      | 410.3790  |
| 53   | 22     | 31     | 52    | 21      | 31      | E    | 0           | 568628.415   | 0.049                      | 436.0981  |
| 53   | 22     | 32     | 52    | 21      | 32      | E    | 0           | 568661.216   | -0.123                     | 436.0890  |
| 53   | 22     | 31     | 52    | 21      | 32      | A    | 0           | 568672.839   | 0.138                      | 436.1011  |
| 53   | 22     | 32     | 52    | 21      | 31      | A    | 0           | 568672.839   | 0.150                      | 436.1011  |
| 51   | 23     | 28     | 50    | 22      | 28      | E    | 0           | 568785.234   | 0.188                      | 422.5658  |
| 51   | 23     | 29     | 50    | 22      | 29      | E    | 0           | 568822.600   | 0.108                      | 422.5578  |
| 51   | 23     | 29     | 50    | 22      | 28      | A    | 0           | 568827.179   | 0.080                      | 422.5706  |
| 51   | 23     | 28     | 50    | 22      | 29      | A    | 0           | 568827.179   | 0.080                      | 422.5706  |
| 34   | 32     | 3      | 33    | 31      | 3       | E    | 0           | 568862.912   | -0.262                     | 365.4967  |



| $J'$ | $K'_a$ | $K'_c$ | $J''$ | $K''_a$ | $K''_c$ | Sym. | $v_{tCH_3}$ | $\nu_{Obs.}$ | $\nu_{Obs.} - \nu_{Calc.}$ | $E_{low}$ |
|------|--------|--------|-------|---------|---------|------|-------------|--------------|----------------------------|-----------|
| 34   | 32     | 2      | 33    | 31      | 3       | A    | 0           | 568865.096   | 0.318                      | 365.5104  |
| 34   | 32     | 3      | 33    | 31      | 2       | A    | 0           | 568865.096   | 0.318                      | 365.5104  |
| 34   | 32     | 2      | 33    | 31      | 2       | E    | 0           | 568905.110   | 0.185                      | 365.5024  |
| 36   | 31     | 6      | 35    | 30      | 6       | E    | 0           | 569719.477   | 0.173                      | 368.0407  |
| 36   | 31     | 6      | 35    | 30      | 5       | A    | 0           | 569726.498   | 0.086                      | 368.0541  |
| 36   | 31     | 5      | 35    | 30      | 6       | A    | 0           | 569726.498   | 0.086                      | 368.0541  |
| 36   | 31     | 5      | 35    | 30      | 5       | E    | 0           | 569763.532   | 0.205                      | 368.0449  |
| 38   | 30     | 9      | 37    | 29      | 9       | E    | 0           | 570565.798   | 0.147                      | 371.8071  |
| 38   | 30     | 8      | 37    | 29      | 9       | A    | 0           | 570578.236   | 0.054                      | 371.8200  |
| 38   | 30     | 9      | 37    | 29      | 8       | A    | 0           | 570578.236   | 0.054                      | 371.8200  |
| 38   | 30     | 8      | 37    | 29      | 8       | E    | 0           | 570611.509   | 0.181                      | 371.8097  |
| 40   | 29     | 12     | 39    | 28      | 12      | E    | 0           | 571393.921   | 0.136                      | 376.8019  |
| 40   | 29     | 12     | 39    | 28      | 11      | A    | 0           | 571411.704   | 0.127                      | 376.8141  |
| 40   | 29     | 11     | 39    | 28      | 12      | A    | 0           | 571411.704   | 0.127                      | 376.8141  |
| 40   | 29     | 11     | 39    | 28      | 11      | E    | 0           | 571440.514   | 0.058                      | 376.8029  |
| 58   | 20     | 38     | 57    | 19      | 38      | E    | 0           | 571540.028   | 0.120                      | 479.4928  |
| 58   | 20     | 39     | 57    | 19      | 38      | A    | 0           | 571555.537   | 0.223                      | 479.4925  |
| 58   | 20     | 39     | 57    | 19      | 39      | E    | 0           | 571564.251   | 0.069                      | 479.4821  |
| 58   | 20     | 38     | 57    | 19      | 39      | A    | 0           | 571624.026   | 0.171                      | 479.4906  |
| 42   | 28     | 15     | 41    | 27      | 14      | E    | 0           | 572191.641   | 0.245                      | 383.0326  |
| 42   | 28     | 14     | 41    | 27      | 15      | A    | 0           | 572214.347   | 0.129                      | 383.0441  |
| 42   | 28     | 15     | 41    | 27      | 14      | A    | 0           | 572214.347   | 0.129                      | 383.0441  |
| 42   | 28     | 14     | 41    | 27      | 15      | E    | 0           | 572238.495   | 0.121                      | 383.0320  |
| 44   | 27     | 17     | 43    | 26      | 17      | E    | 0           | 572940.700   | 0.105                      | 390.5090  |
| 44   | 27     | 18     | 43    | 26      | 17      | A    | 0           | 572968.278   | 0.136                      | 390.5195  |
| 44   | 27     | 17     | 43    | 26      | 18      | A    | 0           | 572968.278   | 0.136                      | 390.5195  |
| 44   | 27     | 18     | 43    | 26      | 18      | E    | 0           | 572987.425   | 0.261                      | 390.5068  |
| 56   | 21     | 35     | 55    | 20      | 35      | E    | 0           | 573536.694   | 0.096                      | 462.5798  |
| 56   | 21     | 36     | 55    | 20      | 36      | E    | 0           | 573563.435   | 0.060                      | 462.5699  |
| 61   | 19     | 42     | 60    | 18      | 43      | A    | 0           | 573578.477   | 0.006                      | 510.8262  |
| 46   | 26     | 20     | 45    | 25      | 20      | E    | 0           | 573615.466   | 0.138                      | 399.2435  |
| 46   | 26     | 20     | 45    | 25      | 21      | A    | 0           | 573647.317   | 0.090                      | 399.2527  |
| 46   | 26     | 21     | 45    | 25      | 20      | A    | 0           | 573647.317   | 0.090                      | 399.2527  |
| 46   | 26     | 21     | 45    | 25      | 21      | E    | 0           | 573660.849   | 0.104                      | 399.2397  |
| 62   | 19     | 44     | 61    | 18      | 43      | E    | 0           | 573929.863   | 0.366                      | 523.9838  |
| 62   | 19     | 44     | 61    | 18      | 43      | A    | 0           | 574011.521   | 0.093                      | 523.9846  |
| 33   | 33     | 1      | 32    | 32      | 0       | A    | 0           | 574136.822   | 0.150                      | 370.7448  |
| 33   | 33     | 0      | 32    | 32      | 1       | A    | 0           | 574136.822   | 0.150                      | 370.7448  |
| 33   | 33     | 1      | 32    | 32      | 1       | E    | 0           | 574140.802   | 0.237                      | 370.7311  |
| 48   | 25     | 23     | 47    | 24      | 23      | E    | 0           | 574177.336   | 0.037                      | 409.2519  |
| 33   | 33     | 0      | 32    | 32      | 0       | E    | 0           | 574179.675   | 0.213                      | 370.7382  |
| 48   | 25     | 24     | 47    | 24      | 23      | A    | 0           | 574213.259   | 0.146                      | 409.2598  |
| 48   | 25     | 23     | 47    | 24      | 24      | A    | 0           | 574213.259   | 0.146                      | 409.2598  |
| 48   | 25     | 24     | 47    | 24      | 24      | E    | 0           | 574220.949   | 0.156                      | 409.2466  |
| 54   | 22     | 32     | 53    | 21      | 32      | E    | 0           | 574439.147   | 0.139                      | 447.1719  |
| 54   | 22     | 33     | 53    | 21      | 33      | E    | 0           | 574471.637   | 0.057                      | 447.1628  |
| 54   | 22     | 32     | 53    | 21      | 33      | A    | 0           | 574483.516   | 0.114                      | 447.1747  |
| 50   | 24     | 26     | 49    | 23      | 26      | E    | 0           | 574569.115   | -0.152                     | 420.5555  |
| 52   | 23     | 29     | 51    | 22      | 29      | E    | 0           | 574703.403   | 0.047                      | 433.1825  |
| 52   | 23     | 30     | 51    | 22      | 30      | E    | 0           | 574740.805   | 0.290                      | 433.1745  |
| 52   | 23     | 30     | 51    | 22      | 29      | A    | 0           | 574745.533   | 0.075                      | 433.1871  |
| 52   | 23     | 29     | 51    | 22      | 30      | A    | 0           | 574745.533   | 0.075                      | 433.1871  |
| 35   | 32     | 4      | 34    | 31      | 4       | E    | 0           | 574999.513   | -0.243                     | 372.4724  |
| 35   | 32     | 3      | 34    | 31      | 4       | A    | 0           | 575001.685   | 0.303                      | 372.4861  |
| 35   | 32     | 4      | 34    | 31      | 3       | A    | 0           | 575001.685   | 0.303                      | 372.4861  |
| 35   | 32     | 3      | 34    | 31      | 3       | E    | 0           | 575041.643   | 0.140                      | 372.4781  |
| 37   | 31     | 7      | 36    | 30      | 7       | E    | 0           | 575853.581   | 0.261                      | 375.4328  |
| 37   | 31     | 7      | 36    | 30      | 6       | A    | 0           | 575860.560   | 0.103                      | 375.4462  |
| 37   | 31     | 6      | 36    | 30      | 7       | A    | 0           | 575860.560   | 0.103                      | 375.4462  |
| 37   | 31     | 6      | 36    | 30      | 6       | E    | 0           | 575897.496   | 0.163                      | 375.4370  |
| 63   | 19     | 45     | 62    | 18      | 44      | E    | 0           | 576570.262   | 0.115                      | 537.3233  |
| 39   | 30     | 10     | 38    | 29      | 10      | E    | 0           | 576695.061   | 0.138                      | 379.6172  |
| 39   | 30     | 9      | 38    | 29      | 10      | A    | 0           | 576707.606   | 0.120                      | 379.6302  |
| 39   | 30     | 10     | 38    | 29      | 9       | A    | 0           | 576707.606   | 0.120                      | 379.6302  |
| 39   | 30     | 9      | 38    | 29      | 9       | E    | 0           | 576740.781   | 0.203                      | 379.6199  |
| 59   | 20     | 39     | 58    | 19      | 39      | E    | 0           | 576815.182   | 0.231                      | 491.7601  |
| 59   | 20     | 40     | 58    | 19      | 40      | E    | 0           | 576850.230   | 0.211                      | 491.7492  |
| 59   | 20     | 39     | 58    | 19      | 40      | A    | 0           | 576934.184   | 0.089                      | 491.7568  |
| 41   | 29     | 13     | 40    | 28      | 13      | E    | 0           | 577515.450   | 0.164                      | 385.0322  |
| 41   | 29     | 13     | 40    | 28      | 12      | A    | 0           | 577533.041   | -0.074                     | 385.0444  |
| 41   | 29     | 12     | 40    | 28      | 13      | A    | 0           | 577533.041   | -0.074                     | 385.0444  |
| 41   | 29     | 12     | 40    | 28      | 12      | E    | 0           | 577561.995   | 0.075                      | 385.0332  |
| 64   | 19     | 46     | 63    | 18      | 45      | A    | 0           | 578203.774   | 0.167                      | 550.9337  |
| 43   | 28     | 16     | 42    | 27      | 15      | E    | 0           | 578301.129   | 0.183                      | 391.6856  |
| 43   | 28     | 15     | 42    | 27      | 16      | A    | 0           | 578323.938   | 0.130                      | 391.6971  |
| 43   | 28     | 16     | 42    | 27      | 15      | A    | 0           | 578323.938   | 0.130                      | 391.6971  |
| 43   | 28     | 15     | 42    | 27      | 16      | E    | 0           | 578348.030   | 0.162                      | 391.6850  |
| 62   | 19     | 43     | 61    | 18      | 44      | E    | 0           | 578958.057   | -0.141                     | 523.8516  |
| 62   | 19     | 43     | 61    | 18      | 44      | A    | 0           | 578969.934   | -0.062                     | 523.8532  |
| 45   | 27     | 18     | 44    | 26      | 18      | E    | 0           | 579032.471   | 0.058                      | 399.5879  |
| 45   | 27     | 19     | 44    | 26      | 18      | A    | 0           | 579060.098   | 0.094                      | 399.5983  |
| 45   | 27     | 18     | 44    | 26      | 19      | A    | 0           | 579060.098   | 0.094                      | 399.5983  |
| 45   | 27     | 19     | 44    | 26      | 19      | E    | 0           | 579078.942   | 0.043                      | 399.5857  |
| 57   | 21     | 36     | 56    | 20      | 36      | E    | 0           | 579132.728   | 0.050                      | 474.3480  |
| 57   | 21     | 37     | 56    | 20      | 37      | E    | 0           | 579158.858   | 0.018                      | 474.3381  |
| 57   | 21     | 37     | 56    | 20      | 36      | A    | 0           | 579177.202   | 0.098                      | 474.3488  |
| 57   | 21     | 36     | 56    | 20      | 37      | A    | 0           | 579180.577   | 0.075                      | 474.3487  |
| 47   | 26     | 21     | 46    | 25      | 21      | E    | 0           | 579681.491   | 0.134                      | 408.7521  |
| 47   | 26     | 21     | 46    | 25      | 22      | A    | 0           | 579713.458   | 0.155                      | 408.7613  |
| 47   | 26     | 22     | 46    | 25      | 21      | A    | 0           | 579713.458   | 0.155                      | 408.7613  |
| 47   | 26     | 22     | 46    | 25      | 22      | E    | 0           | 579726.720   | 0.062                      | 408.7483  |
| 49   | 25     | 24     | 48    | 24      | 24      | E    | 0           | 580206.226   | 0.073                      | 419.1952  |
| 55   | 22     | 33     | 54    | 21      | 33      | E    | 0           | 580219.230   | 0.408                      | 458.4648  |
| 49   | 25     | 25     | 48    | 24      | 24      | A    | 0           | 580242.138   | 0.121                      | 419.2030  |
| 49   | 25     | 24     | 48    | 24      | 25      | A    | 0           | 580242.138   | 0.121                      | 419.2030  |
| 55   | 22     | 33     | 54    | 21      | 34      | A    | 0           | 580263.341   | 0.053                      | 458.4675  |
| 34   | 33     | 2      | 33    | 32      | 1       | A    | 0           | 580273.964   | 0.146                      | 377.5119  |
| 34   | 33     | 1      | 33    | 32      | 2       | A    | 0           | 580273.964   | 0.146                      | 377.5119  |
| 34   | 33     | 2      | 33    | 32      | 2       | E    | 0           | 580277.852   | 0.163                      | 377.4982  |
| 34   | 33     | 1      | 33    | 32      | 1       | E    | 0           | 580316.743   | 0.154                      | 377.5053  |
| 53   | 23     | 30     | 52    | 22      | 30      | E    | 0           | 580600.160   | -0.145                     | 444.0155  |
| 53   | 23     | 31     | 52    | 22      | 31      | E    | 0           | 580636.911   | -0.247                     | 444.0075  |
| 53   | 23     | 31     | 52    | 22      | 30      | A    | 0           | 580642.579   | 0.120                      | 444.0201  |
| 53   | 23     | 30     | 52    | 22      | 31      | A    | 0           | 580642.579   | 0.119                      | 444.0201  |
| 36   | 32     | 5      | 35    | 31      | 5       | E    | 0           | 581135.213   | -0.220                     | 379.6550  |
| 36   | 32     | 4      | 35    | 31      | 5       | A    | 0           | 581137.353   | 0.268                      | 379.6686  |
| 36   | 32     | 5      | 35    | 31      | 4       | A    | 0           | 581137.353   | 0.268                      | 379.6686  |
| 36   | 32     | 4      | 35    | 31      | 4       | E    | 0           | 581177.301   | 0.125                      | 379.6607  |
| 38   | 31     | 8      | 37    | 30      | 8       | E    | 0           | 581985.876   | 0.028                      | 383.0322  |
| 38   | 31     | 8      | 37    | 30      | 7       | A    | 0           | 581993.175   | 0.160                      | 383.0456  |
| 38   | 31     | 7      | 37    | 30      | 8       | A    | 0           | 581993.175   | 0.160                      | 383.0456  |
| 38   | 31     | 7      | 37    | 30      | 7       | E    | 0           | 582029.973   | 0.124                      | 383.0364  |
| 60   | 20     | 40     | 59    | 19      | 41      | A    | 0           | 582177.241   | 0.225                      | 504.2527  |
| 40   | 30     | 11     | 39    | 29      | 11      | E    | 0           | 582822.127   | 0.191                      | 387.6353  |
| 40   | 30     | 10     | 39    | 29      | 11      | A    | 0           | 582834.680   | 0.147                      | 387.6482  |
| 40   | 30     | 11     | 39    | 29      | 10      | A    | 0           | 582834.680   | 0.147                      | 387.6482  |



| $J'$ | $K'_a$ | $K'_c$ | $J''$ | $K''_a$ | $K''_c$ | Sym. | $v_{tCH_3}$ | $\nu_{Obs.}$ | $\nu_{Obs.} - \nu_{Calc.}$ | $E_{low}$ |
|------|--------|--------|-------|---------|---------|------|-------------|--------------|----------------------------|-----------|
| 40   | 30     | 10     | 39    | 29      | 10      | E    | 0           | 582867.798   | 0.233                      | 387.6379  |
| 42   | 29     | 14     | 41    | 28      | 14      | E    | 0           | 583633.588   | 0.071                      | 393.4711  |
| 42   | 29     | 14     | 41    | 28      | 13      | A    | 0           | 583651.479   | 0.093                      | 393.4833  |
| 42   | 29     | 13     | 41    | 28      | 14      | A    | 0           | 583651.479   | 0.093                      | 393.4833  |
| 42   | 29     | 13     | 41    | 28      | 13      | E    | 0           | 583680.279   | 0.168                      | 393.4721  |
| 44   | 28     | 17     | 43    | 27      | 16      | E    | 0           | 584406.070   | 0.170                      | 400.5481  |
| 44   | 28     | 16     | 43    | 27      | 17      | A    | 0           | 584428.891   | 0.083                      | 400.5595  |
| 44   | 28     | 17     | 43    | 27      | 16      | A    | 0           | 584428.891   | 0.083                      | 400.5595  |
| 44   | 28     | 16     | 43    | 27      | 17      | E    | 0           | 584452.924   | 0.164                      | 400.5475  |
| 63   | 19     | 44     | 62    | 18      | 45      | E    | 0           | 584645.997   | 0.217                      | 537.1121  |
| 58   | 21     | 37     | 57    | 20      | 37      | E    | 0           | 584677.379   | 0.071                      | 486.3401  |
| 58   | 21     | 38     | 57    | 20      | 37      | A    | 0           | 584720.269   | 0.100                      | 486.3408  |
| 58   | 21     | 37     | 57    | 20      | 38      | A    | 0           | 584726.730   | -0.173                     | 486.3407  |
| 46   | 27     | 19     | 45    | 26      | 19      | E    | 0           | 585117.922   | 0.036                      | 408.8772  |
| 46   | 27     | 20     | 45    | 26      | 19      | A    | 0           | 585145.660   | 0.135                      | 408.8876  |
| 46   | 27     | 19     | 45    | 26      | 20      | A    | 0           | 585145.660   | 0.135                      | 408.8876  |
| 46   | 27     | 20     | 45    | 26      | 20      | E    | 0           | 585164.395   | 0.111                      | 408.8750  |
| 48   | 26     | 22     | 47    | 25      | 22      | E    | 0           | 585738.841   | 0.137                      | 418.4723  |
| 48   | 26     | 22     | 47    | 25      | 23      | A    | 0           | 585770.774   | 0.073                      | 418.4814  |
| 48   | 26     | 23     | 47    | 25      | 22      | A    | 0           | 585770.774   | 0.073                      | 418.4814  |
| 48   | 26     | 23     | 47    | 25      | 23      | E    | 0           | 585784.020   | 0.141                      | 418.4685  |
| 56   | 22     | 34     | 55    | 21      | 34      | E    | 0           | 585965.468   | 0.107                      | 469.9776  |
| 56   | 22     | 35     | 55    | 21      | 35      | E    | 0           | 585997.254   | 0.212                      | 469.9685  |
| 56   | 22     | 35     | 55    | 21      | 34      | A    | 0           | 586009.819   | 0.024                      | 469.9802  |
| 50   | 25     | 25     | 49    | 24      | 25      | E    | 0           | 586223.421   | 0.283                      | 429.3514  |
| 50   | 25     | 26     | 49    | 24      | 25      | A    | 0           | 586259.189   | 0.133                      | 429.3592  |
| 50   | 25     | 25     | 49    | 24      | 26      | A    | 0           | 586259.189   | 0.133                      | 429.3592  |
| 50   | 25     | 26     | 49    | 24      | 26      | E    | 0           | 586266.334   | 0.036                      | 429.3461  |
| 35   | 33     | 3      | 34    | 32      | 2       | A    | 0           | 586410.491   | 0.121                      | 384.4857  |
| 35   | 33     | 2      | 34    | 32      | 3       | A    | 0           | 586410.491   | 0.121                      | 384.4857  |
| 35   | 33     | 3      | 34    | 32      | 3       | E    | 0           | 586414.488   | 0.270                      | 384.4720  |
| 35   | 33     | 2      | 34    | 32      | 2       | E    | 0           | 586453.342   | 0.223                      | 384.4791  |
| 54   | 23     | 31     | 53    | 22      | 31      | E    | 0           | 586474.293   | -0.036                     | 455.0656  |
| 52   | 24     | 28     | 51    | 23      | 28      | E    | 0           | 586503.437   | 0.078                      | 441.5385  |
| 54   | 23     | 32     | 53    | 22      | 32      | E    | 0           | 586510.942   | 0.088                      | 455.0575  |
| 54   | 23     | 32     | 53    | 22      | 31      | A    | 0           | 586516.664   | 0.124                      | 455.0700  |
| 54   | 23     | 31     | 53    | 22      | 32      | A    | 0           | 586516.664   | 0.122                      | 455.0700  |
| 61   | 20     | 42     | 60    | 19      | 41      | A    | 0           | 586943.733   | 0.108                      | 516.9910  |
| 61   | 20     | 41     | 60    | 19      | 41      | E    | 0           | 587031.143   | 0.250                      | 516.9896  |
| 37   | 32     | 6      | 36    | 31      | 6       | E    | 0           | 587269.804   | -0.235                     | 387.0445  |
| 37   | 32     | 5      | 36    | 31      | 6       | A    | 0           | 587271.959   | 0.240                      | 387.0582  |
| 37   | 32     | 6      | 36    | 31      | 5       | A    | 0           | 587271.959   | 0.240                      | 387.0582  |
| 37   | 32     | 5      | 36    | 31      | 5       | E    | 0           | 587311.941   | 0.164                      | 387.0502  |
| 61   | 20     | 41     | 60    | 19      | 42      | A    | 0           | 587357.053   | 0.248                      | 516.9796  |
| 39   | 31     | 9      | 38    | 30      | 9       | E    | 0           | 588116.734   | 0.054                      | 390.8391  |
| 39   | 31     | 9      | 38    | 30      | 8       | A    | 0           | 588123.954   | 0.073                      | 390.8525  |
| 39   | 31     | 8      | 38    | 30      | 9       | E    | 0           | 588123.954   | 0.073                      | 390.8525  |
| 39   | 31     | 8      | 38    | 30      | 8       | E    | 0           | 588160.782   | 0.115                      | 390.8433  |
| 41   | 30     | 12     | 40    | 29      | 12      | E    | 0           | 588946.593   | 0.160                      | 395.8615  |
| 41   | 30     | 11     | 40    | 29      | 12      | A    | 0           | 588959.256   | 0.187                      | 395.8744  |
| 41   | 30     | 12     | 40    | 29      | 11      | A    | 0           | 588959.256   | 0.187                      | 395.8744  |
| 41   | 30     | 11     | 40    | 29      | 11      | E    | 0           | 588992.163   | 0.128                      | 395.8641  |
| 43   | 29     | 15     | 42    | 28      | 15      | E    | 0           | 589748.377   | 0.215                      | 402.1189  |
| 43   | 29     | 15     | 42    | 28      | 14      | A    | 0           | 589766.123   | 0.049                      | 402.1311  |
| 43   | 29     | 14     | 42    | 28      | 15      | A    | 0           | 589766.123   | 0.049                      | 402.1311  |
| 43   | 29     | 14     | 42    | 28      | 14      | E    | 0           | 589794.856   | 0.145                      | 402.1198  |
| 59   | 21     | 38     | 58    | 20      | 38      | E    | 0           | 590165.801   | 0.300                      | 498.5573  |
| 59   | 21     | 39     | 58    | 20      | 39      | E    | 0           | 590190.578   | 0.128                      | 498.5475  |
| 59   | 21     | 39     | 58    | 20      | 38      | A    | 0           | 590205.547   | 0.208                      | 498.5579  |
| 59   | 21     | 38     | 58    | 20      | 39      | A    | 0           | 590218.994   | 0.534                      | 498.5576  |
| 45   | 28     | 18     | 44    | 27      | 17      | E    | 0           | 590505.916   | 0.049                      | 409.6203  |
| 45   | 28     | 17     | 44    | 27      | 18      | A    | 0           | 590528.919   | 0.098                      | 409.6316  |
| 45   | 28     | 18     | 44    | 27      | 17      | A    | 0           | 590528.919   | 0.098                      | 409.6316  |
| 45   | 28     | 17     | 44    | 27      | 18      | E    | 0           | 590552.756   | 0.097                      | 409.6196  |
| 47   | 27     | 20     | 46    | 26      | 20      | E    | 0           | 591196.385   | -0.132                     | 418.3772  |
| 47   | 27     | 21     | 46    | 26      | 20      | A    | 0           | 591224.320   | 0.112                      | 418.3875  |
| 47   | 27     | 20     | 46    | 26      | 21      | A    | 0           | 591224.320   | 0.112                      | 418.3875  |
| 47   | 27     | 21     | 46    | 26      | 21      | E    | 0           | 591243.111   | 0.293                      | 418.3749  |
| 57   | 22     | 35     | 56    | 21      | 35      | E    | 0           | 591675.886   | -0.056                     | 481.7110  |
| 34   | 34     | 0      | 33    | 33      | 1       | A    | 0           | 591682.129   | 0.155                      | 389.8959  |
| 34   | 34     | 1      | 33    | 33      | 0       | A    | 0           | 591682.129   | 0.155                      | 389.8959  |
| 34   | 34     | 1      | 33    | 33      | 1       | E    | 0           | 591691.652   | 0.388                      | 389.8823  |
| 57   | 22     | 35     | 56    | 21      | 36      | A    | 0           | 591720.647   | -0.005                     | 481.7134  |
| 34   | 34     | 0      | 33    | 33      | 0       | E    | 0           | 591726.850   | 0.057                      | 389.8907  |
| 49   | 26     | 23     | 48    | 25      | 23      | E    | 0           | 591786.867   | 0.139                      | 428.4044  |
| 49   | 26     | 23     | 48    | 25      | 24      | A    | 0           | 591818.879   | 0.098                      | 428.4135  |
| 49   | 26     | 24     | 48    | 25      | 23      | A    | 0           | 591818.879   | 0.098                      | 428.4135  |
| 49   | 26     | 24     | 48    | 25      | 24      | E    | 0           | 591831.898   | 0.128                      | 428.4006  |
| 51   | 25     | 26     | 50    | 24      | 26      | E    | 0           | 592227.555   | 0.146                      | 439.7211  |
| 51   | 25     | 27     | 50    | 24      | 26      | A    | 0           | 592263.470   | 0.084                      | 439.7287  |
| 51   | 25     | 26     | 50    | 24      | 27      | A    | 0           | 592263.470   | 0.084                      | 439.7287  |
| 51   | 25     | 27     | 50    | 24      | 27      | E    | 0           | 592270.502   | 0.117                      | 439.7157  |
| 55   | 23     | 32     | 54    | 22      | 32      | E    | 0           | 592323.913   | 0.168                      | 466.3331  |
| 55   | 23     | 33     | 54    | 22      | 33      | E    | 0           | 592360.089   | 0.172                      | 466.3251  |
| 55   | 23     | 33     | 54    | 22      | 32      | A    | 0           | 592366.104   | 0.085                      | 466.3374  |
| 55   | 23     | 32     | 54    | 22      | 33      | A    | 0           | 592366.104   | 0.081                      | 466.3374  |
| 53   | 24     | 29     | 52    | 23      | 29      | E    | 0           | 592444.736   | 0.008                      | 452.3525  |
| 62   | 20     | 42     | 61    | 19      | 43      | A    | 0           | 592484.601   | -0.548                     | 529.9389  |
| 53   | 24     | 29     | 52    | 23      | 30      | A    | 0           | 592484.601   | 0.473                      | 452.3586  |
| 53   | 24     | 30     | 52    | 23      | 29      | A    | 0           | 592484.601   | 0.473                      | 452.3586  |
| 53   | 24     | 30     | 52    | 23      | 30      | E    | 0           | 592484.601   | -0.175                     | 452.3457  |
| 36   | 33     | 4      | 35    | 32      | 3       | A    | 0           | 592546.298   | 0.111                      | 391.6661  |
| 36   | 33     | 3      | 35    | 32      | 4       | A    | 0           | 592546.298   | 0.111                      | 391.6661  |
| 36   | 33     | 4      | 35    | 32      | 4       | E    | 0           | 592550.171   | 0.162                      | 391.6524  |
| 36   | 33     | 3      | 35    | 32      | 3       | E    | 0           | 592589.036   | 0.126                      | 391.6595  |
| 38   | 32     | 7      | 37    | 31      | 7       | E    | 0           | 593403.179   | -0.223                     | 394.6412  |
| 38   | 32     | 6      | 37    | 31      | 7       | A    | 0           | 593405.348   | 0.236                      | 394.6548  |
| 38   | 32     | 7      | 37    | 31      | 6       | A    | 0           | 593405.348   | 0.236                      | 394.6548  |
| 38   | 32     | 6      | 37    | 31      | 6       | E    | 0           | 593445.185   | 0.053                      | 394.6469  |
| 40   | 31     | 10     | 39    | 30      | 10      | E    | 0           | 594245.775   | 0.173                      | 398.8537  |
| 40   | 31     | 10     | 39    | 30      | 9       | A    | 0           | 594252.982   | 0.145                      | 398.8671  |
| 40   | 31     | 9      | 39    | 30      | 10      | A    | 0           | 594252.982   | 0.145                      | 398.8671  |
| 40   | 31     | 9      | 39    | 30      | 9       | E    | 0           | 594289.677   | 0.107                      | 398.8579  |
| 42   | 30     | 13     | 41    | 29      | 13      | E    | 0           | 595068.300   | 0.152                      | 404.2960  |
| 42   | 30     | 12     | 41    | 29      | 13      | A    | 0           | 595080.886   | 0.060                      | 404.3089  |
| 42   | 30     | 13     | 41    | 29      | 12      | A    | 0           | 595080.886   | 0.060                      | 404.3089  |
| 42   | 30     | 12     | 41    | 29      | 12      | E    | 0           | 595113.861   | 0.141                      | 404.2986  |
| 60   | 21     | 39     | 59    | 20      | 39      | E    | 0           | 595591.691   | 0.216                      | 511.0006  |
| 60   | 21     | 40     | 59    | 20      | 40      | E    | 0           | 595616.552   | 0.382                      | 510.9908  |
| 60   | 21     | 40     | 59    | 20      | 39      | A    | 0           | 595626.040   | 0.354                      | 511.0012  |
| 60   | 21     | 39     | 59    | 20      | 40      | A    | 0           | 595650.752   | -0.074                     | 511.0005  |
| 44   | 29     | 16     | 43    | 28      | 16      | E    | 0           | 595859.048   | 0.157                      | 410.9757  |
| 44   | 29     | 16     | 43    | 28      | 15      | A    | 0           | 595876.925   | 0.076                      | 410.9879  |
| 44   | 29     | 15     | 43    | 28      | 16      | A    | 0           | 595876.925   | 0.076                      | 410.9879  |
| 44   | 29     | 15     | 43    | 28      | 15      | E    | 0           | 595905.511   | 0.120                      | 410.9766  |
| 63   | 20     | 44     | 62    | 19      | 43      | A    | 0           | 596330.879   | 0.186                      | 543.1656  |



| $J'$ | $K'_a$ | $K'_c$ | $J''$ | $K''_a$ | $K''_c$ | Sym. | $v_{tCH_3}$ | $\nu_{Obs.}$ | $\nu_{Obs.} - \nu_{Calc.}$ | $E_{low}$ |
|------|--------|--------|-------|---------|---------|------|-------------|--------------|----------------------------|-----------|
| 46   | 28     | 19     | 45    | 27      | 18      | E    | 0           | 596600.505   | 0.075                      | 418.9024  |
| 46   | 28     | 18     | 45    | 27      | 19      | A    | 0           | 596623.537   | 0.101                      | 418.9137  |
| 46   | 28     | 19     | 45    | 27      | 18      | A    | 0           | 596623.537   | 0.101                      | 418.9137  |
| 46   | 28     | 18     | 45    | 27      | 19      | E    | 0           | 596647.298   | 0.148                      | 418.9017  |
| 48   | 27     | 21     | 47    | 26      | 21      | E    | 0           | 597267.864   | 0.080                      | 428.0882  |
| 48   | 27     | 22     | 47    | 26      | 21      | A    | 0           | 597295.675   | 0.143                      | 428.0984  |
| 48   | 27     | 21     | 47    | 26      | 22      | A    | 0           | 597295.675   | 0.143                      | 428.0984  |
| 48   | 27     | 22     | 47    | 26      | 22      | E    | 0           | 597314.093   | 0.110                      | 428.0859  |
| 58   | 22     | 36     | 57    | 21      | 37      | A    | 0           | 597392.409   | -0.149                     | 493.6681  |
| 63   | 20     | 43     | 62    | 19      | 44      | A    | 0           | 597585.834   | 0.027                      | 543.1316  |
| 63   | 20     | 43     | 62    | 19      | 44      | E    | 0           | 597634.251   | 0.170                      | 543.1280  |
| 35   | 34     | 1      | 34    | 33      | 2       | A    | 0           | 597818.448   | 0.152                      | 396.8678  |
| 35   | 34     | 2      | 34    | 33      | 1       | A    | 0           | 597818.448   | 0.152                      | 396.8678  |
| 50   | 26     | 24     | 49    | 25      | 24      | E    | 0           | 597824.914   | 0.153                      | 438.5488  |
| 35   | 34     | 2      | 34    | 33      | 2       | E    | 0           | 597827.705   | 0.140                      | 396.8542  |
| 50   | 26     | 24     | 49    | 25      | 25      | A    | 0           | 597856.949   | 0.076                      | 438.5578  |
| 50   | 26     | 25     | 49    | 25      | 24      | A    | 0           | 597856.949   | 0.076                      | 438.5578  |
| 35   | 34     | 1      | 34    | 33      | 1       | E    | 0           | 597862.832   | -0.266                     | 396.8626  |
| 50   | 26     | 25     | 49    | 25      | 25      | E    | 0           | 597869.877   | 0.219                      | 438.5449  |
| 56   | 23     | 34     | 55    | 22      | 34      | E    | 0           | 598182.581   | 0.044                      | 477.8108  |
| 56   | 23     | 34     | 55    | 22      | 33      | A    | 0           | 598189.286   | 0.205                      | 477.8230  |
| 56   | 23     | 33     | 55    | 22      | 34      | A    | 0           | 598189.286   | 0.196                      | 477.8230  |
| 52   | 25     | 27     | 51    | 24      | 27      | E    | 0           | 598218.155   | 0.074                      | 450.3045  |
| 52   | 25     | 28     | 51    | 24      | 27      | A    | 0           | 598254.176   | 0.057                      | 450.3121  |
| 52   | 25     | 27     | 51    | 24      | 28      | A    | 0           | 598254.176   | 0.057                      | 450.3121  |
| 52   | 25     | 28     | 51    | 24      | 28      | E    | 0           | 598261.000   | 0.142                      | 450.2991  |
| 54   | 24     | 30     | 53    | 23      | 30      | E    | 0           | 598367.515   | 0.150                      | 463.3823  |
| 54   | 24     | 30     | 53    | 23      | 31      | A    | 0           | 598406.963   | 0.131                      | 463.3882  |
| 54   | 24     | 31     | 53    | 23      | 30      | A    | 0           | 598406.963   | 0.132                      | 463.3882  |
| 54   | 24     | 31     | 53    | 23      | 31      | E    | 0           | 598406.963   | -0.179                     | 463.3755  |
| 37   | 33     | 5      | 36    | 32      | 4       | A    | 0           | 598681.233   | 0.112                      | 399.0533  |
| 37   | 33     | 4      | 36    | 32      | 5       | A    | 0           | 598681.233   | 0.112                      | 399.0533  |
| 37   | 33     | 5      | 36    | 32      | 5       | E    | 0           | 598685.136   | 0.219                      | 399.0396  |
| 37   | 33     | 4      | 36    | 32      | 4       | E    | 0           | 598724.000   | 0.182                      | 399.0467  |
| 39   | 32     | 8      | 38    | 31      | 8       | E    | 0           | 599535.146   | -0.190                     | 402.4452  |
| 39   | 32     | 7      | 38    | 31      | 8       | A    | 0           | 599537.292   | 0.213                      | 402.4588  |
| 39   | 32     | 8      | 38    | 31      | 7       | A    | 0           | 599537.292   | 0.213                      | 402.4588  |
| 39   | 32     | 7      | 38    | 31      | 7       | E    | 0           | 599577.136   | 0.078                      | 402.4508  |
| 41   | 31     | 11     | 40    | 30      | 11      | E    | 0           | 600372.569   | 0.184                      | 407.0762  |
| 41   | 31     | 11     | 40    | 30      | 10      | A    | 0           | 600379.782   | 0.122                      | 407.0895  |
| 41   | 31     | 10     | 40    | 30      | 11      | A    | 0           | 600379.782   | 0.122                      | 407.0895  |
| 41   | 31     | 10     | 40    | 30      | 10      | E    | 0           | 600416.459   | 0.124                      | 407.0803  |
| 64   | 20     | 45     | 63    | 19      | 44      | E    | 0           | 600469.166   | 0.032                      | 556.6138  |
| 64   | 20     | 45     | 63    | 19      | 44      | A    | 0           | 600571.135   | 0.026                      | 556.6158  |
| 61   | 21     | 40     | 60    | 20      | 41      | A    | 0           | 601020.036   | 0.239                      | 523.6707  |
| 43   | 30     | 14     | 42    | 29      | 14      | E    | 0           | 601186.941   | 0.137                      | 412.9390  |
| 43   | 30     | 13     | 42    | 29      | 14      | A    | 0           | 601199.666   | 0.141                      | 412.9519  |
| 43   | 30     | 14     | 42    | 29      | 13      | A    | 0           | 601199.666   | 0.141                      | 412.9519  |
| 43   | 30     | 13     | 42    | 29      | 13      | E    | 0           | 601232.530   | 0.189                      | 412.9416  |
| 45   | 29     | 17     | 44    | 28      | 17      | E    | 0           | 601965.963   | 0.606                      | 420.0418  |
| 45   | 29     | 17     | 44    | 28      | 16      | A    | 0           | 601983.485   | 0.119                      | 420.0539  |
| 45   | 29     | 16     | 44    | 28      | 17      | A    | 0           | 601983.485   | 0.119                      | 420.0539  |
| 45   | 29     | 16     | 44    | 28      | 16      | E    | 0           | 602011.876   | 0.072                      | 420.0427  |
| 47   | 28     | 20     | 46    | 27      | 19      | E    | 0           | 602689.132   | -0.029                     | 428.3946  |
| 64   | 20     | 44     | 63    | 19      | 45      | A    | 0           | 602701.204   | 0.109                      | 556.5586  |
| 47   | 28     | 19     | 46    | 27      | 20      | A    | 0           | 602712.411   | 0.188                      | 428.4059  |
| 47   | 28     | 20     | 46    | 27      | 19      | A    | 0           | 602712.411   | 0.188                      | 428.4059  |
| 64   | 20     | 44     | 63    | 19      | 45      | E    | 0           | 602717.207   | -0.117                     | 556.5556  |
| 47   | 28     | 19     | 46    | 27      | 20      | E    | 0           | 602735.968   | 0.164                      | 428.3939  |
| 59   | 22     | 37     | 58    | 21      | 37      | E    | 0           | 602977.080   | -0.042                     | 505.8429  |
| 59   | 22     | 38     | 58    | 21      | 38      | E    | 0           | 603007.335   | 0.123                      | 505.8338  |
| 49   | 27     | 22     | 48    | 26      | 22      | E    | 0           | 603331.338   | 0.192                      | 438.0104  |
| 49   | 27     | 23     | 48    | 26      | 22      | A    | 0           | 603359.053   | 0.100                      | 438.0206  |
| 49   | 27     | 22     | 48    | 26      | 23      | A    | 0           | 603359.053   | 0.100                      | 438.0206  |
| 49   | 27     | 23     | 48    | 26      | 23      | E    | 0           | 603377.293   | 0.060                      | 438.0081  |
| 51   | 26     | 25     | 50    | 25      | 25      | E    | 0           | 603852.189   | 0.091                      | 448.9057  |
| 51   | 26     | 25     | 50    | 25      | 26      | A    | 0           | 603884.162   | -0.113                     | 448.9147  |
| 51   | 26     | 26     | 50    | 25      | 25      | A    | 0           | 603884.162   | -0.113                     | 448.9147  |
| 51   | 26     | 26     | 50    | 25      | 26      | E    | 0           | 603896.887   | 0.047                      | 448.9018  |
| 57   | 23     | 34     | 56    | 22      | 34      | E    | 0           | 603941.480   | 0.132                      | 489.5233  |
| 36   | 34     | 2      | 35    | 33      | 3       | A    | 0           | 603954.164   | 0.141                      | 404.0462  |
| 36   | 34     | 3      | 35    | 33      | 2       | A    | 0           | 603954.164   | 0.141                      | 404.0462  |
| 36   | 34     | 3      | 35    | 33      | 3       | E    | 0           | 603963.499   | 0.230                      | 404.0326  |
| 57   | 23     | 35     | 56    | 22      | 35      | E    | 0           | 603976.776   | 0.030                      | 489.5152  |
| 57   | 23     | 34     | 56    | 22      | 35      | A    | 0           | 603983.902   | 0.119                      | 489.5273  |
| 36   | 34     | 2      | 35    | 33      | 2       | E    | 0           | 603999.038   | 0.232                      | 404.0410  |
| 53   | 25     | 28     | 52    | 24      | 28      | E    | 0           | 604194.355   | 0.141                      | 461.1021  |
| 53   | 25     | 29     | 52    | 24      | 28      | A    | 0           | 604230.428   | 0.107                      | 461.1096  |
| 53   | 25     | 28     | 52    | 24      | 29      | A    | 0           | 604230.428   | 0.107                      | 461.1096  |
| 53   | 25     | 29     | 52    | 24      | 29      | E    | 0           | 604236.843   | 0.065                      | 461.0967  |
| 55   | 24     | 31     | 54    | 23      | 31      | E    | 0           | 604269.679   | -0.280                     | 474.6282  |
| 55   | 24     | 31     | 54    | 23      | 32      | A    | 0           | 604309.561   | 0.063                      | 474.6341  |
| 55   | 24     | 32     | 54    | 23      | 31      | A    | 0           | 604309.561   | 0.063                      | 474.6341  |
| 65   | 20     | 46     | 64    | 19      | 45      | A    | 0           | 604352.376   | 0.015                      | 570.3149  |
| 38   | 33     | 6      | 37    | 32      | 5       | A    | 0           | 604815.087   | 0.068                      | 406.6474  |
| 38   | 33     | 5      | 37    | 32      | 6       | A    | 0           | 604815.087   | 0.068                      | 406.6474  |
| 38   | 33     | 6      | 37    | 32      | 6       | E    | 0           | 604818.986   | 0.201                      | 406.6338  |
| 38   | 33     | 5      | 37    | 32      | 5       | E    | 0           | 604857.859   | 0.176                      | 406.6408  |
| 40   | 32     | 9      | 39    | 31      | 9       | E    | 0           | 605665.449   | -0.202                     | 410.4566  |
| 40   | 32     | 8      | 39    | 31      | 9       | A    | 0           | 605667.673   | 0.243                      | 410.4702  |
| 40   | 32     | 9      | 39    | 31      | 8       | A    | 0           | 605667.673   | 0.243                      | 410.4702  |
| 40   | 32     | 8      | 39    | 31      | 8       | E    | 0           | 605707.506   | 0.144                      | 410.4622  |
| 62   | 21     | 41     | 61    | 20      | 41      | E    | 0           | 606227.255   | 0.428                      | 536.5708  |
| 62   | 21     | 42     | 61    | 20      | 41      | A    | 0           | 606234.258   | 0.240                      | 536.5717  |
| 62   | 21     | 42     | 61    | 20      | 42      | E    | 0           | 606257.849   | 0.075                      | 536.5608  |
| 62   | 21     | 41     | 61    | 20      | 42      | A    | 0           | 606321.896   | 0.072                      | 536.5693  |
| 42   | 31     | 12     | 41    | 30      | 12      | E    | 0           | 606496.918   | 0.122                      | 415.5066  |
| 42   | 31     | 12     | 41    | 30      | 11      | A    | 0           | 606504.234   | 0.122                      | 415.5199  |
| 42   | 31     | 11     | 41    | 30      | 12      | A    | 0           | 606504.234   | 0.122                      | 415.5199  |
| 42   | 31     | 11     | 41    | 30      | 11      | E    | 0           | 606540.868   | 0.146                      | 415.5107  |
| 44   | 30     | 15     | 43    | 29      | 15      | E    | 0           | 607302.218   | 0.111                      | 421.7907  |
| 44   | 30     | 14     | 43    | 29      | 15      | A    | 0           | 607314.983   | 0.105                      | 421.8036  |
| 44   | 30     | 15     | 43    | 29      | 14      | A    | 0           | 607314.983   | 0.105                      | 421.8036  |
| 44   | 30     | 14     | 43    | 29      | 14      | E    | 0           | 607347.577   | -0.030                     | 421.7933  |
| 66   | 20     | 47     | 65    | 19      | 46      | A    | 0           | 607496.239   | 0.491                      | 584.2700  |
| 46   | 29     | 18     | 45    | 28      | 18      | E    | 0           | 608067.277   | 0.075                      | 429.3174  |
| 46   | 29     | 18     | 45    | 28      | 17      | A    | 0           | 608085.368   | 0.102                      | 429.3295  |
| 46   | 29     | 17     | 45    | 28      | 18      | A    | 0           | 608085.368   | 0.102                      | 429.3295  |
| 46   | 29     | 17     | 45    | 28      | 17      | E    | 0           | 608113.693   | 0.101                      | 429.3183  |
| 60   | 22     | 38     | 59    | 21      | 38      | E    | 0           | 608560.892   | 0.070                      | 518.2431  |
| 60   | 22     | 39     | 59    | 21      | 39      | E    | 0           | 608590.243   | -0.064                     | 518.2341  |
| 60   | 22     | 39     | 59    | 21      | 38      | A    | 0           | 608604.798   | 0.301                      | 518.2451  |
| 60   | 22     | 38     | 59    | 21      | 39      | A    | 0           | 608607.233   | 0.384                      | 518.2451  |
| 48   | 28     | 21     | 47    | 27      | 20      | E    | 0           | 608771.693   | 0.082                      | 438.0974  |
| 48   | 28     | 20     | 47    | 27      | 21      | A    | 0           | 608794.661   | -0.073                     | 438.1086  |
| 48   | 28     | 21     | 47    | 27      | 20      | A    | 0           | 608794.661   | -0.073                     | 438.1086  |



| $J'$ | $K'_a$ | $K'_c$ | $J''$ | $K''_a$ | $K''_c$ | Sym. | $v_{tCH_3}$ | $\nu_{Obs.}$ | $\nu_{Obs.} - \nu_{Calc.}$ | $E_{low}$ |
|------|--------|--------|-------|---------|---------|------|-------------|--------------|----------------------------|-----------|
| 48   | 28     | 20     | 47    | 27      | 21      | E    | 0           | 608818.291   | 0.121                      | 438.0967  |
| 35   | 35     | 1      | 34    | 34      | 0       | A    | 0           | 609225.493   | 0.134                      | 409.6323  |
| 35   | 35     | 0      | 34    | 34      | 1       | A    | 0           | 609225.493   | 0.134                      | 409.6323  |
| 35   | 35     | 1      | 34    | 34      | 1       | E    | 0           | 609240.104   | 0.182                      | 409.6190  |
| 35   | 35     | 0      | 34    | 34      | 0       | E    | 0           | 609271.796   | 0.185                      | 409.6286  |
| 50   | 27     | 23     | 49    | 26      | 23      | E    | 0           | 609386.034   | 0.004                      | 448.1443  |
| 50   | 27     | 24     | 49    | 26      | 23      | A    | 0           | 609413.981   | 0.078                      | 448.1544  |
| 50   | 27     | 23     | 49    | 26      | 24      | A    | 0           | 609413.981   | 0.078                      | 448.1544  |
| 50   | 27     | 24     | 49    | 26      | 24      | E    | 0           | 609432.233   | 0.235                      | 448.1419  |
| 58   | 23     | 36     | 57    | 22      | 36      | E    | 0           | 609740.466   | 0.048                      | 501.4391  |
| 58   | 23     | 35     | 57    | 22      | 36      | A    | 0           | 609748.143   | 0.164                      | 501.4511  |
| 52   | 26     | 26     | 51    | 25      | 26      | E    | 0           | 609868.019   | 0.017                      | 459.4757  |
| 52   | 26     | 26     | 51    | 25      | 27      | A    | 0           | 609900.301   | 0.052                      | 459.4845  |
| 52   | 26     | 27     | 51    | 25      | 26      | A    | 0           | 609900.301   | 0.052                      | 459.4845  |
| 52   | 26     | 27     | 51    | 25      | 27      | E    | 0           | 609912.669   | 0.089                      | 459.4717  |
| 37   | 34     | 3      | 36    | 33      | 4       | A    | 0           | 610089.149   | 0.125                      | 411.4313  |
| 37   | 34     | 4      | 36    | 33      | 3       | A    | 0           | 610089.149   | 0.125                      | 411.4313  |
| 37   | 34     | 4      | 36    | 33      | 4       | E    | 0           | 610098.413   | 0.170                      | 411.4177  |
| 37   | 34     | 3      | 36    | 33      | 3       | E    | 0           | 610133.968   | 0.185                      | 411.4261  |
| 56   | 24     | 32     | 55    | 23      | 32      | E    | 0           | 610151.160   | 0.048                      | 486.0909  |
| 54   | 25     | 29     | 53    | 24      | 29      | E    | 0           | 610154.978   | 0.162                      | 472.1144  |
| 54   | 25     | 30     | 53    | 24      | 30      | E    | 0           | 610197.110   | -0.045                     | 472.1089  |
| 39   | 33     | 7      | 38    | 32      | 6       | A    | 0           | 610947.842   | 0.127                      | 414.4487  |
| 39   | 33     | 6      | 38    | 32      | 7       | A    | 0           | 610947.842   | 0.127                      | 414.4487  |
| 39   | 33     | 7      | 38    | 32      | 7       | E    | 0           | 610951.674   | 0.224                      | 414.4350  |
| 39   | 33     | 6      | 38    | 32      | 6       | E    | 0           | 610990.286   | -0.058                     | 414.4421  |
| 63   | 21     | 43     | 62    | 20      | 42      | A    | 0           | 611394.891   | 0.154                      | 549.7021  |
| 63   | 21     | 42     | 62    | 20      | 42      | E    | 0           | 611413.975   | 0.064                      | 549.7007  |
| 63   | 21     | 42     | 62    | 20      | 43      | A    | 0           | 611555.110   | 0.251                      | 549.6976  |
| 41   | 32     | 10     | 40    | 31      | 10      | E    | 0           | 611793.970   | -0.176                     | 418.6756  |
| 41   | 32     | 9      | 40    | 31      | 10      | A    | 0           | 611796.251   | 0.288                      | 418.6892  |
| 41   | 32     | 10     | 40    | 31      | 9       | A    | 0           | 611796.251   | 0.288                      | 418.6892  |
| 41   | 32     | 9      | 40    | 31      | 9       | E    | 0           | 611835.999   | 0.154                      | 418.6812  |
| 43   | 31     | 13     | 42    | 30      | 13      | E    | 0           | 612618.819   | 0.234                      | 424.1453  |
| 43   | 31     | 12     | 42    | 30      | 12      | A    | 0           | 612626.058   | 0.110                      | 424.1586  |
| 43   | 31     | 12     | 42    | 30      | 13      | A    | 0           | 612626.058   | 0.110                      | 424.1586  |
| 43   | 31     | 12     | 42    | 30      | 12      | E    | 0           | 612662.490   | 0.002                      | 424.1494  |
| 66   | 20     | 46     | 65    | 19      | 47      | E    | 0           | 613275.950   | 0.147                      | 584.1149  |
| 66   | 20     | 46     | 65    | 19      | 47      | A    | 0           | 613293.052   | 0.031                      | 584.1171  |
| 45   | 30     | 16     | 44    | 29      | 16      | E    | 0           | 613413.926   | 0.169                      | 430.8514  |
| 45   | 30     | 15     | 44    | 29      | 16      | A    | 0           | 613426.702   | 0.123                      | 430.8642  |
| 45   | 30     | 16     | 44    | 29      | 15      | A    | 0           | 613426.702   | 0.123                      | 430.8642  |
| 45   | 30     | 15     | 44    | 29      | 15      | E    | 0           | 613459.216   | 0.001                      | 430.8539  |
| 61   | 22     | 39     | 60    | 21      | 39      | E    | 0           | 614094.678   | 0.023                      | 530.8674  |
| 61   | 22     | 40     | 60    | 21      | 40      | E    | 0           | 614123.534   | 0.029                      | 530.8584  |
| 61   | 22     | 40     | 60    | 21      | 39      | A    | 0           | 614137.828   | 0.522                      | 530.8693  |
| 61   | 22     | 39     | 60    | 21      | 40      | A    | 0           | 614142.031   | 0.074                      | 530.8691  |
| 47   | 29     | 19     | 46    | 28      | 19      | E    | 0           | 614164.197   | 0.145                      | 438.8028  |
| 47   | 29     | 19     | 46    | 28      | 18      | A    | 0           | 614182.276   | 0.102                      | 438.8149  |
| 47   | 29     | 18     | 46    | 28      | 19      | A    | 0           | 614182.276   | 0.102                      | 438.8149  |
| 47   | 29     | 18     | 46    | 28      | 18      | E    | 0           | 614210.617   | 0.238                      | 438.8037  |
| 49   | 28     | 22     | 48    | 27      | 21      | E    | 0           | 614847.387   | 0.074                      | 448.0109  |
| 49   | 28     | 21     | 48    | 27      | 22      | A    | 0           | 614870.638   | 0.139                      | 448.0221  |
| 49   | 28     | 22     | 48    | 27      | 21      | A    | 0           | 614870.638   | 0.139                      | 448.0221  |
| 49   | 28     | 21     | 48    | 27      | 22      | E    | 0           | 614893.983   | 0.203                      | 448.0101  |
| 36   | 35     | 2      | 35    | 34      | 1       | A    | 0           | 615360.989   | 0.155                      | 416.8089  |
| 36   | 35     | 1      | 35    | 34      | 2       | A    | 0           | 615360.989   | 0.155                      | 416.8089  |
| 36   | 35     | 2      | 35    | 34      | 2       | E    | 0           | 615375.582   | 0.209                      | 416.7956  |
| 36   | 35     | 1      | 35    | 34      | 1       | E    | 0           | 615407.226   | 0.157                      | 416.8052  |
| 51   | 27     | 24     | 50    | 26      | 24      | E    | 0           | 615432.018   | 0.174                      | 458.4901  |
| 59   | 23     | 36     | 58    | 22      | 36      | E    | 0           | 615436.919   | 0.201                      | 513.5912  |
| 51   | 27     | 25     | 50    | 26      | 24      | A    | 0           | 615460.037   | 0.250                      | 458.5001  |
| 51   | 27     | 24     | 50    | 26      | 25      | A    | 0           | 615460.037   | 0.250                      | 458.5001  |
| 51   | 27     | 25     | 50    | 26      | 25      | E    | 0           | 615477.612   | -0.072                     | 458.4877  |
| 59   | 23     | 36     | 58    | 22      | 37      | A    | 0           | 615479.697   | 0.329                      | 513.5950  |
| 53   | 26     | 27     | 52    | 25      | 27      | E    | 0           | 615871.852   | 0.155                      | 470.2589  |
| 53   | 26     | 27     | 52    | 25      | 28      | A    | 0           | 615904.111   | 0.092                      | 470.2677  |
| 53   | 26     | 28     | 52    | 25      | 27      | A    | 0           | 615904.111   | 0.092                      | 470.2677  |
| 53   | 26     | 28     | 52    | 25      | 28      | E    | 0           | 615916.144   | 0.045                      | 470.2549  |
| 57   | 24     | 33     | 56    | 23      | 33      | E    | 0           | 616009.289   | -0.033                     | 497.7708  |
| 55   | 25     | 30     | 54    | 24      | 30      | E    | 0           | 616098.924   | 0.086                      | 483.3417  |
| 55   | 25     | 31     | 54    | 24      | 30      | A    | 0           | 616135.202   | 0.103                      | 483.3489  |
| 55   | 25     | 30     | 54    | 24      | 31      | A    | 0           | 616135.202   | 0.103                      | 483.3489  |
| 55   | 25     | 31     | 54    | 24      | 31      | E    | 0           | 616140.891   | -0.046                     | 483.3362  |
| 38   | 34     | 4      | 37    | 33      | 5       | A    | 0           | 616223.319   | 0.159                      | 419.0231  |
| 38   | 34     | 5      | 37    | 33      | 4       | A    | 0           | 616223.319   | 0.159                      | 419.0231  |
| 38   | 34     | 5      | 37    | 33      | 5       | E    | 0           | 616232.494   | 0.144                      | 419.0096  |
| 38   | 34     | 4      | 37    | 33      | 4       | E    | 0           | 616268.043   | 0.151                      | 419.0179  |
| 64   | 21     | 44     | 63    | 20      | 43      | A    | 0           | 616432.848   | 0.334                      | 563.0649  |
| 64   | 21     | 43     | 63    | 20      | 43      | E    | 0           | 616488.296   | -0.072                     | 563.0629  |
| 64   | 21     | 44     | 63    | 20      | 44      | E    | 0           | 616589.797   | 0.070                      | 563.0506  |
| 64   | 21     | 43     | 63    | 20      | 44      | A    | 0           | 616719.956   | 0.171                      | 563.0570  |
| 40   | 33     | 8      | 39    | 32      | 7       | A    | 0           | 617079.200   | 0.158                      | 422.4572  |
| 40   | 33     | 7      | 39    | 32      | 8       | A    | 0           | 617079.200   | 0.158                      | 422.4572  |
| 40   | 33     | 8      | 39    | 32      | 8       | E    | 0           | 617082.967   | 0.226                      | 422.4435  |
| 40   | 33     | 7      | 39    | 32      | 7       | E    | 0           | 617121.768   | 0.137                      | 422.4505  |
| 42   | 32     | 11     | 41    | 31      | 11      | E    | 0           | 617920.457   | -0.154                     | 427.1024  |
| 42   | 32     | 10     | 41    | 31      | 11      | A    | 0           | 617922.706   | 0.235                      | 427.1160  |
| 42   | 32     | 11     | 41    | 31      | 10      | A    | 0           | 617922.706   | 0.235                      | 427.1160  |
| 42   | 32     | 10     | 41    | 31      | 10      | E    | 0           | 617962.418   | 0.123                      | 427.1080  |
| 44   | 31     | 14     | 43    | 30      | 14      | E    | 0           | 618737.386   | -0.113                     | 432.9925  |
| 44   | 31     | 14     | 43    | 30      | 13      | A    | 0           | 618745.087   | 0.177                      | 433.0057  |
| 44   | 31     | 13     | 43    | 30      | 14      | A    | 0           | 618745.087   | 0.177                      | 433.0057  |
| 44   | 31     | 13     | 43    | 30      | 13      | E    | 0           | 618781.377   | 0.003                      | 432.9965  |
| 46   | 30     | 17     | 45    | 29      | 17      | E    | 0           | 619521.547   | 0.111                      | 440.1212  |
| 46   | 30     | 16     | 45    | 29      | 17      | A    | 0           | 619534.432   | 0.117                      | 440.1339  |
| 46   | 30     | 17     | 45    | 29      | 16      | A    | 0           | 619534.432   | 0.117                      | 440.1339  |
| 46   | 30     | 16     | 45    | 29      | 16      | E    | 0           | 619567.016   | 0.165                      | 440.1237  |
| 62   | 22     | 40     | 61    | 21      | 40      | E    | 0           | 619574.074   | 0.046                      | 543.7168  |
| 62   | 22     | 41     | 61    | 21      | 41      | E    | 0           | 619602.161   | -0.090                     | 543.7078  |
| 62   | 22     | 40     | 61    | 21      | 41      | A    | 0           | 619623.603   | -0.097                     | 543.7183  |
| 48   | 29     | 20     | 47    | 28      | 20      | E    | 0           | 620255.402   | -0.114                     | 448.4982  |
| 48   | 29     | 20     | 47    | 28      | 19      | A    | 0           | 620273.769   | 0.068                      | 448.5102  |
| 48   | 29     | 19     | 47    | 28      | 20      | A    | 0           | 620273.769   | 0.068                      | 448.5102  |
| 50   | 28     | 23     | 49    | 27      | 22      | E    | 0           | 620915.982   | 0.206                      | 458.1354  |
| 50   | 28     | 22     | 49    | 27      | 23      | A    | 0           | 620939.016   | -0.016                     | 458.1465  |
| 50   | 28     | 23     | 49    | 27      | 22      | A    | 0           | 620939.016   | -0.016                     | 458.1465  |
| 50   | 28     | 22     | 49    | 27      | 23      | E    | 0           | 620962.264   | 0.118                      | 458.1346  |
| 60   | 23     | 38     | 59    | 22      | 38      | E    | 0           | 621166.585   | -0.068                     | 525.9480  |
| 60   | 23     | 38     | 59    | 22      | 37      | A    | 0           | 621175.282   | 0.042                      | 525.9597  |
| 52   | 27     | 25     | 51    | 26      | 25      | E    | 0           | 621468.144   | 0.181                      | 469.0481  |
| 52   | 27     | 26     | 51    | 26      | 25      | A    | 0           | 621495.962   | -0.020                     | 469.0581  |
| 52   | 27     | 25     | 51    | 26      | 26      | A    | 0           | 621495.962   | -0.020                     | 469.0581  |
| 37   | 35     | 3      | 36    | 34      | 2       | A    | 0           | 621495.962   | 0.251                      | 424.1920  |
| 37   | 35     | 2      | 36    | 34      | 3       | A    | 0           | 621495.962   | 0.251                      | 424.1920  |
| 37   | 35     | 3      | 36    | 34      | 3       | E    | 0           | 621510.142   | -0.084                     | 424.1787  |



| $J'$ | $K'_a$ | $K'_c$ | $J''$ | $K''_a$ | $K''_c$ | Sym. | $v_{tCH_3}$ | $\nu_{Obs.}$ | $\nu_{Obs.} - \nu_{Calc.}$ | $E_{low}$ |
|------|--------|--------|-------|---------|---------|------|-------------|--------------|----------------------------|-----------|
| 52   | 27     | 26     | 51    | 26      | 26      | E    | 0           | 621513.840   | 0.173                      | 469.0457  |
| 37   | 35     | 2      | 36    | 34      | 2       | E    | 0           | 621541.912   | -0.016                     | 424.1883  |
| 54   | 26     | 28     | 53    | 25      | 28      | E    | 0           | 621862.513   | 0.148                      | 481.2559  |
| 54   | 26     | 28     | 53    | 25      | 29      | A    | 0           | 621894.896   | 0.128                      | 481.2645  |
| 54   | 26     | 29     | 53    | 25      | 28      | A    | 0           | 621894.896   | 0.128                      | 481.2645  |
| 54   | 26     | 29     | 53    | 25      | 29      | E    | 0           | 621906.648   | 0.069                      | 481.2519  |
| 56   | 25     | 31     | 55    | 24      | 31      | E    | 0           | 622025.242   | 0.076                      | 494.7845  |
| 56   | 25     | 32     | 55    | 24      | 32      | E    | 0           | 622067.209   | 0.201                      | 494.7790  |
| 39   | 34     | 5      | 38    | 33      | 6       | A    | 0           | 622356.453   | 0.168                      | 426.8219  |
| 39   | 34     | 6      | 38    | 33      | 5       | A    | 0           | 622356.453   | 0.168                      | 426.8219  |
| 39   | 34     | 6      | 38    | 33      | 6       | E    | 0           | 622365.443   | -0.001                     | 426.8083  |
| 39   | 34     | 5      | 38    | 33      | 5       | E    | 0           | 622400.940   | -0.046                     | 426.8167  |
| 41   | 33     | 9      | 40    | 32      | 8       | A    | 0           | 623208.924   | 0.105                      | 430.6731  |
| 41   | 33     | 8      | 40    | 32      | 9       | A    | 0           | 623208.924   | 0.105                      | 430.6731  |
| 41   | 33     | 9      | 40    | 32      | 9       | E    | 0           | 623212.649   | 0.169                      | 430.6594  |
| 41   | 33     | 8      | 40    | 32      | 8       | E    | 0           | 623251.464   | 0.101                      | 430.6664  |
| 43   | 32     | 12     | 42    | 31      | 12      | E    | 0           | 624044.675   | -0.153                     | 435.7372  |
| 43   | 32     | 11     | 42    | 31      | 12      | A    | 0           | 624046.913   | 0.180                      | 435.7507  |
| 43   | 32     | 12     | 42    | 31      | 11      | A    | 0           | 624046.913   | 0.180                      | 435.7507  |
| 43   | 32     | 11     | 42    | 31      | 11      | E    | 0           | 624086.640   | 0.145                      | 435.7428  |
| 45   | 31     | 15     | 44    | 30      | 14      | A    | 0           | 624860.834   | 0.100                      | 442.0614  |
| 45   | 31     | 14     | 44    | 30      | 15      | A    | 0           | 624860.834   | 0.100                      | 442.0614  |
| 63   | 22     | 41     | 62    | 21      | 41      | E    | 0           | 624994.026   | 0.338                      | 556.7924  |
| 63   | 22     | 42     | 62    | 21      | 42      | E    | 0           | 625021.514   | 0.084                      | 556.7834  |
| 63   | 22     | 42     | 62    | 21      | 41      | A    | 0           | 625030.615   | 0.154                      | 556.7940  |
| 63   | 22     | 41     | 62    | 21      | 42      | A    | 0           | 625047.953   | 0.166                      | 556.7935  |
| 47   | 30     | 18     | 46    | 29      | 18      | E    | 0           | 625624.871   | 0.053                      | 449.6004  |
| 47   | 30     | 17     | 46    | 29      | 18      | A    | 0           | 625637.820   | 0.062                      | 449.6131  |
| 47   | 30     | 18     | 46    | 29      | 17      | A    | 0           | 625637.820   | 0.062                      | 449.6131  |
| 66   | 21     | 46     | 65    | 20      | 45      | A    | 0           | 625998.079   | 0.208                      | 590.4978  |
| 49   | 29     | 21     | 48    | 28      | 21      | E    | 0           | 626341.348   | 0.160                      | 458.4038  |
| 49   | 29     | 21     | 48    | 28      | 20      | A    | 0           | 626359.501   | 0.061                      | 458.4158  |
| 49   | 29     | 20     | 48    | 28      | 21      | A    | 0           | 626359.501   | 0.061                      | 458.4158  |
| 49   | 29     | 20     | 48    | 28      | 20      | E    | 0           | 626387.540   | 0.167                      | 458.4046  |
| 36   | 36     | 0      | 35    | 35      | 1       | A    | 0           | 626766.968   | 0.172                      | 429.9539  |
| 36   | 36     | 1      | 35    | 35      | 0       | A    | 0           | 626766.968   | 0.172                      | 429.9539  |
| 36   | 36     | 1      | 35    | 35      | 1       | E    | 0           | 626786.599   | 0.167                      | 429.9411  |
| 61   | 23     | 38     | 60    | 22      | 38      | E    | 0           | 626814.552   | 0.155                      | 538.5425  |
| 36   | 36     | 0      | 35    | 35      | 0       | E    | 0           | 626814.044   | 0.182                      | 429.9517  |
| 61   | 23     | 39     | 60    | 22      | 39      | E    | 0           | 626823.998   | 0.096                      | 538.5345  |
| 66   | 21     | 45     | 65    | 20      | 46      | A    | 0           | 626878.211   | 0.053                      | 590.4740  |
| 51   | 28     | 24     | 50    | 27      | 23      | E    | 0           | 626976.645   | 0.152                      | 468.4712  |
| 51   | 28     | 23     | 50    | 27      | 24      | A    | 0           | 626999.962   | 0.139                      | 468.4823  |
| 51   | 28     | 24     | 50    | 27      | 23      | A    | 0           | 626999.962   | 0.139                      | 468.4823  |
| 51   | 28     | 23     | 50    | 27      | 24      | E    | 0           | 627022.904   | 0.146                      | 468.4704  |
| 53   | 27     | 26     | 52    | 26      | 26      | E    | 0           | 627493.756   | 0.021                      | 479.8187  |
| 53   | 27     | 27     | 52    | 26      | 26      | A    | 0           | 627521.957   | 0.123                      | 479.8286  |
| 53   | 27     | 26     | 52    | 26      | 27      | A    | 0           | 627521.957   | 0.123                      | 479.8286  |
| 53   | 27     | 27     | 52    | 26      | 27      | E    | 0           | 627539.455   | 0.162                      | 479.8162  |
| 38   | 35     | 4      | 37    | 34      | 3       | A    | 0           | 627629.986   | 0.118                      | 431.7817  |
| 38   | 35     | 3      | 37    | 34      | 4       | A    | 0           | 627629.986   | 0.118                      | 431.7817  |
| 38   | 35     | 4      | 37    | 34      | 4       | E    | 0           | 627644.547   | 0.192                      | 431.7684  |
| 59   | 24     | 35     | 58    | 23      | 35      | E    | 0           | 627650.522   | 0.161                      | 521.7847  |
| 38   | 35     | 3      | 37    | 34      | 3       | E    | 0           | 627676.191   | 0.128                      | 431.7780  |
| 59   | 24     | 35     | 58    | 23      | 36      | A    | 0           | 627690.565   | 0.307                      | 521.7901  |
| 59   | 24     | 36     | 58    | 23      | 35      | A    | 0           | 627690.565   | 0.313                      | 521.7901  |
| 55   | 26     | 29     | 54    | 25      | 29      | E    | 0           | 627839.365   | 0.219                      | 492.4669  |
| 55   | 26     | 29     | 54    | 25      | 30      | A    | 0           | 627871.798   | 0.163                      | 492.4755  |
| 55   | 26     | 30     | 54    | 25      | 29      | A    | 0           | 627871.798   | 0.163                      | 492.4755  |
| 55   | 26     | 30     | 54    | 25      | 30      | E    | 0           | 627883.169   | 0.009                      | 492.4629  |
| 57   | 25     | 32     | 56    | 24      | 32      | E    | 0           | 627932.732   | 0.116                      | 506.4433  |
| 57   | 25     | 33     | 56    | 24      | 32      | A    | 0           | 627969.112   | 0.057                      | 506.4504  |
| 57   | 25     | 32     | 56    | 24      | 33      | A    | 0           | 627969.112   | 0.057                      | 506.4504  |
| 57   | 25     | 33     | 56    | 24      | 33      | E    | 0           | 627974.286   | 0.101                      | 506.4378  |
| 40   | 34     | 6      | 39    | 33      | 7       | A    | 0           | 628488.409   | 0.163                      | 434.8277  |
| 40   | 34     | 7      | 39    | 33      | 6       | A    | 0           | 628488.409   | 0.163                      | 434.8277  |
| 40   | 34     | 7      | 39    | 33      | 7       | E    | 0           | 628497.649   | 0.278                      | 434.8142  |
| 40   | 34     | 6      | 39    | 33      | 6       | E    | 0           | 628533.037   | 0.123                      | 434.8225  |
| 42   | 33     | 10     | 41    | 32      | 9       | A    | 0           | 629336.508   | -0.352                     | 439.0965  |
| 42   | 33     | 9      | 41    | 32      | 10      | A    | 0           | 629336.508   | -0.352                     | 439.0965  |
| 42   | 33     | 10     | 41    | 32      | 10      | E    | 0           | 629340.376   | -0.103                     | 439.0829  |
| 42   | 33     | 9      | 41    | 32      | 9       | E    | 0           | 629379.181   | -0.173                     | 439.0899  |
| 44   | 32     | 13     | 43    | 31      | 13      | E    | 0           | 630166.034   | -0.533                     | 444.5801  |
| 44   | 32     | 12     | 43    | 31      | 13      | A    | 0           | 630168.281   | -0.241                     | 444.5936  |
| 44   | 32     | 13     | 43    | 31      | 12      | A    | 0           | 630168.281   | -0.241                     | 444.5936  |
| 44   | 32     | 12     | 43    | 31      | 12      | E    | 0           | 630207.883   | -0.333                     | 444.5857  |
| 64   | 22     | 43     | 63    | 21      | 42      | A    | 0           | 630377.308   | 0.077                      | 570.0969  |
| 67   | 21     | 46     | 66    | 20      | 46      | E    | 0           | 630692.730   | -0.470                     | 604.5716  |
| 46   | 31     | 16     | 45    | 30      | 16      | E    | 0           | 630965.598   | -0.018                     | 451.3127  |
| 46   | 31     | 16     | 45    | 30      | 15      | A    | 0           | 630972.921   | -0.217                     | 451.3259  |
| 46   | 31     | 15     | 45    | 30      | 16      | A    | 0           | 630972.921   | -0.217                     | 451.3259  |
| 48   | 30     | 19     | 47    | 29      | 19      | E    | 0           | 631723.380   | -0.181                     | 459.2891  |
| 48   | 30     | 18     | 47    | 29      | 19      | A    | 0           | 631736.276   | -0.290                     | 459.3018  |
| 48   | 30     | 19     | 47    | 29      | 18      | A    | 0           | 631736.276   | -0.290                     | 459.3018  |
| 48   | 30     | 18     | 47    | 29      | 18      | E    | 0           | 631768.683   | -0.190                     | 459.2915  |
| 62   | 23     | 39     | 61    | 22      | 39      | E    | 0           | 632406.859   | -0.104                     | 551.3514  |
| 50   | 29     | 22     | 49    | 28      | 22      | E    | 0           | 632420.321   | -0.323                     | 468.5200  |
| 62   | 23     | 40     | 61    | 22      | 39      | A    | 0           | 632449.662   | 0.158                      | 551.3547  |
| 50   | 29     | 21     | 49    | 28      | 21      | E    | 0           | 632466.406   | -0.345                     | 468.5208  |
| 37   | 36     | 1      | 36    | 35      | 2       | A    | 0           | 632901.100   | -0.296                     | 437.3351  |
| 37   | 36     | 2      | 36    | 35      | 1       | A    | 0           | 632901.100   | -0.296                     | 437.3351  |
| 37   | 36     | 2      | 36    | 35      | 2       | E    | 0           | 632920.827   | -0.182                     | 437.3223  |
| 37   | 36     | 1      | 36    | 35      | 1       | E    | 0           | 632948.214   | -0.234                     | 437.3330  |
| 52   | 28     | 25     | 51    | 27      | 24      | E    | 0           | 633028.695   | -0.235                     | 479.0187  |
| 52   | 28     | 24     | 51    | 27      | 25      | A    | 0           | 633052.025   | -0.314                     | 479.0297  |
| 52   | 28     | 25     | 51    | 27      | 24      | A    | 0           | 633052.025   | -0.314                     | 479.0297  |
| 52   | 28     | 24     | 51    | 27      | 25      | E    | 0           | 633074.821   | -0.261                     | 479.0178  |
| 60   | 24     | 36     | 59    | 23      | 36      | E    | 0           | 633429.268   | -0.321                     | 534.1199  |
| 60   | 24     | 37     | 59    | 23      | 37      | E    | 0           | 633466.968   | -0.348                     | 534.1130  |
| 60   | 24     | 36     | 59    | 23      | 37      | A    | 0           | 633469.349   | -0.249                     | 534.1251  |
| 60   | 24     | 37     | 59    | 23      | 36      | A    | 0           | 633469.349   | -0.235                     | 534.1251  |
| 54   | 27     | 27     | 53    | 26      | 27      | E    | 0           | 633508.192   | -0.285                     | 490.8022  |
| 54   | 27     | 28     | 53    | 26      | 27      | A    | 0           | 633536.383   | -0.278                     | 490.8120  |
| 54   | 27     | 27     | 53    | 26      | 28      | A    | 0           | 633536.383   | -0.279                     | 490.8120  |
| 54   | 27     | 28     | 53    | 26      | 28      | E    | 0           | 633553.548   | -0.330                     | 490.7997  |
| 39   | 35     | 5      | 38    | 34      | 4       | A    | 0           | 633762.871   | -0.302                     | 439.5781  |
| 39   | 35     | 4      | 38    | 34      | 5       | A    | 0           | 633762.871   | -0.302                     | 439.5781  |
| 39   | 35     | 5      | 38    | 34      | 5       | E    | 0           | 633777.404   | -0.227                     | 439.5649  |
| 56   | 26     | 30     | 55    | 25      | 30      | E    | 0           | 633800.841   | -0.292                     | 503.8925  |
| 39   | 35     | 4      | 38    | 34      | 4       | E    | 0           | 633809.032   | -0.311                     | 439.5744  |
| 58   | 25     | 33     | 57    | 24      | 33      | E    | 0           | 633819.573   | -0.356                     | 518.3187  |
| 56   | 26     | 30     | 55    | 25      | 31      | A    | 0           | 633833.413   | -0.301                     | 503.9010  |
| 56   | 26     | 31     | 55    | 25      | 30      | A    | 0           | 633833.413   | -0.301                     | 503.9010  |
| 56   | 26     | 31     | 55    | 25      | 31      | E    | 0           | 633844.661   | -0.273                     | 503.8885  |
| 58   | 25     | 34     | 57    | 24      | 33      | A    | 0           | 633856.218   | -0.249                     | 518.3256  |
| 58   | 25     | 33     | 57    | 24      | 34      | A    | 0           | 633856.218   | -0.249                     | 518.3256  |



| $J'$ | $K'_a$ | $K'_c$ | $J''$ | $K''_a$ | $K''_c$ | Sym. | $v_{tCH_3}$ | $\nu_{Obs.}$ | $\nu_{Obs.} - \nu_{Calc.}$ | $E_{low}$ |
|------|--------|--------|-------|---------|---------|------|-------------|--------------|----------------------------|-----------|
| 58   | 25     | 34     | 57    | 24      | 34      | E    | 0           | 633860.880   | -0.329                     | 518.3131  |
| 41   | 34     | 7      | 40    | 33      | 8       | A    | 0           | 634618.614   | -0.271                     | 443.0407  |
| 41   | 34     | 8      | 40    | 33      | 7       | A    | 0           | 634618.614   | -0.271                     | 443.0407  |
| 41   | 34     | 8      | 40    | 33      | 8       | E    | 0           | 634627.784   | -0.188                     | 443.0272  |
| 41   | 34     | 7      | 40    | 33      | 7       | E    | 0           | 634663.155   | -0.359                     | 443.0355  |
| 43   | 33     | 11     | 42    | 32      | 10      | A    | 0           | 635462.747   | -0.223                     | 447.7277  |
| 43   | 33     | 10     | 42    | 32      | 11      | A    | 0           | 635462.747   | -0.223                     | 447.7277  |
| 43   | 33     | 11     | 42    | 32      | 11      | E    | 0           | 635466.256   | -0.288                     | 447.7140  |
| 43   | 33     | 10     | 42    | 32      | 10      | E    | 0           | 635505.098   | -0.312                     | 447.7210  |
| 65   | 22     | 44     | 64    | 21      | 43      | A    | 0           | 635645.109   | -0.244                     | 583.6286  |
| 65   | 22     | 43     | 64    | 21      | 44      | A    | 0           | 635705.684   | -0.251                     | 583.6269  |
| 45   | 32     | 13     | 44    | 31      | 14      | A    | 0           | 636287.361   | -0.242                     | 453.6448  |
| 45   | 32     | 14     | 44    | 31      | 13      | A    | 0           | 636287.361   | -0.242                     | 453.6448  |
| 45   | 32     | 13     | 44    | 31      | 13      | E    | 0           | 636326.945   | -0.276                     | 453.6368  |
| 47   | 31     | 17     | 46    | 30      | 17      | E    | 0           | 637073.948   | -0.303                     | 460.7862  |
| 47   | 31     | 17     | 46    | 30      | 16      | A    | 0           | 637081.553   | -0.282                     | 460.7994  |
| 47   | 31     | 16     | 46    | 30      | 17      | A    | 0           | 637081.553   | -0.282                     | 460.7994  |
| 47   | 31     | 16     | 46    | 30      | 16      | E    | 0           | 637117.645   | -0.380                     | 460.7902  |
| 49   | 30     | 20     | 48    | 29      | 20      | E    | 0           | 637816.961   | -0.348                     | 469.1877  |
| 49   | 30     | 19     | 48    | 29      | 20      | A    | 0           | 637830.046   | -0.337                     | 469.2003  |
| 49   | 30     | 20     | 48    | 29      | 19      | A    | 0           | 637830.046   | -0.337                     | 469.2003  |
| 49   | 30     | 19     | 48    | 29      | 19      | E    | 0           | 637862.345   | -0.218                     | 469.1901  |
| 69   | 21     | 49     | 68    | 20      | 48      | E    | 0           | 637924.657   | -0.223                     | 633.4684  |
| 63   | 23     | 40     | 62    | 22      | 40      | E    | 0           | 637978.397   | -0.532                     | 564.3836  |
| 63   | 23     | 41     | 62    | 22      | 41      | E    | 0           | 638010.922   | -0.364                     | 564.3755  |
| 51   | 29     | 23     | 50    | 28      | 23      | E    | 0           | 638493.088   | -0.355                     | 478.8469  |
| 51   | 29     | 23     | 50    | 28      | 22      | A    | 0           | 638511.534   | -0.312                     | 478.8588  |
| 51   | 29     | 22     | 50    | 28      | 23      | A    | 0           | 638511.534   | -0.312                     | 478.8588  |
| 51   | 29     | 22     | 50    | 28      | 22      | E    | 0           | 638539.319   | -0.147                     | 478.8477  |
| 38   | 36     | 2      | 37    | 35      | 3       | A    | 0           | 639035.053   | -0.344                     | 444.9228  |
| 38   | 36     | 3      | 37    | 35      | 2       | A    | 0           | 639035.053   | -0.344                     | 444.9228  |
| 38   | 36     | 3      | 37    | 35      | 3       | E    | 0           | 639054.590   | -0.394                     | 444.9100  |
| 53   | 28     | 26     | 52    | 27      | 25      | E    | 0           | 639072.178   | -0.351                     | 489.7780  |
| 38   | 36     | 2      | 37    | 35      | 2       | E    | 0           | 639082.484   | 0.052                      | 444.9207  |
| 53   | 28     | 25     | 52    | 27      | 26      | A    | 0           | 639095.694   | -0.330                     | 489.7889  |
| 53   | 28     | 26     | 52    | 27      | 25      | A    | 0           | 639095.694   | -0.330                     | 489.7889  |
| 53   | 28     | 25     | 52    | 27      | 26      | E    | 0           | 639118.424   | -0.139                     | 489.7771  |
| 61   | 24     | 37     | 60    | 23      | 37      | E    | 0           | 639178.262   | -0.382                     | 546.6748  |
| 61   | 24     | 38     | 60    | 23      | 38      | E    | 0           | 639215.728   | -0.220                     | 546.6679  |
| 61   | 24     | 37     | 60    | 23      | 38      | A    | 0           | 639218.402   | -0.375                     | 546.6799  |
| 61   | 24     | 38     | 60    | 23      | 37      | A    | 0           | 639218.402   | -0.345                     | 546.6799  |
| 55   | 27     | 28     | 54    | 26      | 28      | E    | 0           | 639511.259   | -0.210                     | 501.9990  |
| 55   | 27     | 29     | 54    | 26      | 28      | A    | 0           | 639539.460   | -0.286                     | 502.0087  |
| 55   | 27     | 28     | 54    | 26      | 29      | A    | 0           | 639539.460   | -0.286                     | 502.0087  |
| 55   | 27     | 29     | 54    | 26      | 29      | E    | 0           | 639556.305   | -0.400                     | 501.9964  |
| 59   | 25     | 34     | 58    | 24      | 34      | E    | 0           | 639685.487   | -0.273                     | 530.4110  |
| 59   | 25     | 35     | 58    | 24      | 34      | A    | 0           | 639722.204   | -0.200                     | 530.4178  |
| 59   | 25     | 34     | 58    | 24      | 35      | A    | 0           | 639722.204   | -0.201                     | 530.4178  |
| 57   | 26     | 31     | 56    | 25      | 31      | E    | 0           | 639747.296   | -0.070                     | 515.5330  |
| 57   | 26     | 31     | 56    | 25      | 32      | A    | 0           | 639779.719   | -0.329                     | 515.5414  |
| 57   | 26     | 32     | 56    | 25      | 31      | A    | 0           | 639779.719   | -0.329                     | 515.5414  |
| 40   | 35     | 6      | 39    | 34      | 5       | A    | 0           | 639895.253   | -0.237                     | 447.5815  |
| 40   | 35     | 5      | 39    | 34      | 6       | A    | 0           | 639895.253   | -0.237                     | 447.5815  |
| 40   | 35     | 6      | 39    | 34      | 6       | E    | 0           | 639909.724   | -0.191                     | 447.5682  |
| 40   | 35     | 5      | 39    | 34      | 5       | E    | 0           | 639941.399   | -0.233                     | 447.5778  |
| 42   | 34     | 8      | 41    | 33      | 9       | A    | 0           | 640747.770   | -0.263                     | 451.4611  |
| 42   | 34     | 9      | 41    | 33      | 8       | A    | 0           | 640747.770   | -0.263                     | 451.4611  |
| 42   | 34     | 9      | 41    | 33      | 9       | E    | 0           | 640756.922   | -0.158                     | 451.4476  |
| 42   | 34     | 8      | 41    | 33      | 8       | E    | 0           | 640792.554   | -0.065                     | 451.4559  |
| 44   | 33     | 12     | 43    | 32      | 11      | A    | 0           | 641586.716   | -0.231                     | 456.5667  |
| 44   | 33     | 11     | 43    | 32      | 12      | A    | 0           | 641586.716   | -0.231                     | 456.5667  |
| 44   | 33     | 12     | 43    | 32      | 12      | E    | 0           | 641590.146   | -0.326                     | 456.5531  |
| 44   | 33     | 11     | 43    | 32      | 11      | E    | 0           | 641629.084   | -0.242                     | 456.5601  |
| 46   | 32     | 15     | 45    | 31      | 15      | E    | 0           | 642401.157   | -0.503                     | 462.8910  |
| 46   | 32     | 14     | 45    | 31      | 15      | A    | 0           | 642403.557   | -0.169                     | 462.9045  |
| 46   | 32     | 15     | 45    | 31      | 14      | A    | 0           | 642403.557   | -0.169                     | 462.9045  |
| 46   | 32     | 14     | 45    | 31      | 14      | E    | 0           | 642443.174   | -0.090                     | 462.8965  |
| 48   | 31     | 18     | 47    | 30      | 18      | E    | 0           | 643178.334   | -0.539                     | 470.4690  |
| 48   | 31     | 18     | 47    | 30      | 17      | A    | 0           | 643186.203   | -0.320                     | 470.4821  |
| 48   | 31     | 17     | 47    | 30      | 18      | A    | 0           | 643186.203   | -0.320                     | 470.4821  |
| 48   | 31     | 17     | 47    | 30      | 17      | E    | 0           | 643222.225   | -0.382                     | 470.4729  |
| 64   | 23     | 41     | 63    | 22      | 41      | E    | 0           | 643502.446   | -0.067                     | 577.6399  |
| 64   | 23     | 42     | 63    | 22      | 41      | A    | 0           | 643544.065   | -0.089                     | 577.6429  |
| 64   | 23     | 41     | 63    | 22      | 42      | A    | 0           | 643547.264   | -0.094                     | 577.6428  |
| 50   | 30     | 21     | 49    | 29      | 21      | E    | 0           | 643905.578   | -0.114                     | 479.2963  |
| 50   | 30     | 20     | 49    | 29      | 21      | A    | 0           | 643918.477   | -0.364                     | 479.3089  |
| 50   | 30     | 21     | 49    | 29      | 20      | A    | 0           | 643918.477   | -0.364                     | 479.3089  |
| 50   | 30     | 20     | 49    | 29      | 20      | E    | 0           | 643950.552   | -0.332                     | 479.2987  |
| 37   | 37     | 1      | 36    | 36      | 0       | A    | 0           | 644305.987   | -0.258                     | 450.8605  |
| 37   | 37     | 0      | 36    | 36      | 1       | A    | 0           | 644305.987   | -0.258                     | 450.8605  |
| 37   | 37     | 1      | 36    | 36      | 1       | E    | 0           | 644330.351   | -0.338                     | 450.8484  |
| 37   | 37     | 0      | 36    | 36      | 0       | E    | 0           | 644353.216   | -0.284                     | 450.8600  |
| 52   | 29     | 24     | 51    | 28      | 24      | E    | 0           | 644558.736   | -0.389                     | 489.3849  |
| 52   | 29     | 24     | 51    | 28      | 23      | A    | 0           | 644577.301   | -0.311                     | 489.3967  |
| 52   | 29     | 23     | 51    | 28      | 24      | A    | 0           | 644577.301   | -0.311                     | 489.3967  |
| 52   | 29     | 23     | 51    | 28      | 23      | E    | 0           | 644604.770   | -0.289                     | 489.3856  |
| 62   | 24     | 38     | 61    | 23      | 38      | E    | 0           | 644894.912   | -0.414                     | 559.4500  |
| 62   | 24     | 39     | 61    | 23      | 39      | E    | 0           | 644931.913   | -0.268                     | 559.4431  |
| 62   | 24     | 39     | 61    | 23      | 38      | A    | 0           | 644935.290   | -0.250                     | 559.4549  |
| 54   | 28     | 27     | 53    | 27      | 26      | E    | 0           | 645106.412   | -0.301                     | 500.7496  |
| 54   | 28     | 26     | 53    | 27      | 27      | A    | 0           | 645130.100   | -0.199                     | 500.7605  |
| 54   | 28     | 27     | 53    | 27      | 26      | A    | 0           | 645130.100   | -0.199                     | 500.7605  |
| 54   | 28     | 26     | 53    | 27      | 27      | E    | 0           | 645152.255   | -0.363                     | 500.7487  |
| 39   | 36     | 3      | 38    | 35      | 4       | A    | 0           | 645168.380   | -0.301                     | 452.7171  |
| 39   | 36     | 4      | 38    | 35      | 3       | A    | 0           | 645168.380   | -0.301                     | 452.7171  |
| 39   | 36     | 4      | 38    | 35      | 4       | E    | 0           | 645188.086   | -0.155                     | 452.7044  |
| 39   | 36     | 3      | 38    | 35      | 3       | E    | 0           | 645215.471   | -0.226                     | 452.7150  |
| 56   | 27     | 29     | 55    | 26      | 29      | E    | 0           | 645501.875   | -0.083                     | 513.4094  |
| 56   | 27     | 30     | 55    | 26      | 30      | E    | 0           | 645546.796   | -0.221                     | 513.4068  |
| 60   | 25     | 36     | 59    | 24      | 35      | A    | 0           | 645565.194   | -0.237                     | 542.7276  |
| 60   | 25     | 35     | 59    | 24      | 36      | A    | 0           | 645565.194   | -0.238                     | 542.7276  |
| 60   | 25     | 36     | 59    | 24      | 36      | E    | 0           | 645568.816   | -0.500                     | 542.7153  |
| 58   | 26     | 32     | 57    | 25      | 32      | E    | 0           | 645676.463   | -0.370                     | 527.3889  |
| 58   | 26     | 32     | 57    | 25      | 33      | A    | 0           | 645709.248   | -0.372                     | 527.3972  |
| 58   | 26     | 33     | 57    | 25      | 32      | A    | 0           | 645709.248   | -0.372                     | 527.3972  |
| 58   | 26     | 33     | 57    | 25      | 33      | E    | 0           | 645719.814   | -0.353                     | 527.3848  |
| 41   | 35     | 7      | 40    | 34      | 6       | A    | 0           | 646026.379   | -0.298                     | 455.7918  |
| 41   | 35     | 6      | 40    | 34      | 7       | A    | 0           | 646026.379   | -0.298                     | 455.7918  |
| 41   | 35     | 7      | 40    | 34      | 7       | E    | 0           | 646040.937   | -0.129                     | 455.7786  |
| 41   | 35     | 6      | 40    | 34      | 6       | E    | 0           | 646072.432   | -0.354                     | 455.7881  |
| 43   | 34     | 9      | 42    | 33      | 10      | A    | 0           | 646875.223   | -0.294                     | 460.0889  |
| 43   | 34     | 10     | 42    | 33      | 9       | A    | 0           | 646875.223   | -0.294                     | 460.0889  |
| 43   | 34     | 10     | 42    | 33      | 10      | E    | 0           | 646884.086   | -0.433                     | 460.0754  |
| 43   | 34     | 9      | 42    | 33      | 9       | E    | 0           | 646919.748   | -0.309                     | 460.0837  |
| 45   | 33     | 13     | 44    | 32      | 12      | A    | 0           | 647708.261   | -0.318                     | 465.6138  |
| 45   | 33     | 12     | 44    | 32      | 13      | A    | 0           | 647708.261   | -0.318                     | 465.6138  |



| $J'$ | $K'_a$ | $K'_c$ | $J''$ | $K''_a$ | $K''_c$ | Sym. | $v_{tCH_3}$ | $\nu_{Obs.}$ | $\nu_{Obs.} - \nu_{Calc.}$ | $E_{low}$ |
|------|--------|--------|-------|---------|---------|------|-------------|--------------|----------------------------|-----------|
| 45   | 33     | 12     | 44    | 32      | 12      | E    | 0           | 647750.581   | -0.311                     | 465.6071  |
| 47   | 32     | 15     | 46    | 31      | 16      | A    | 0           | 648516.441   | -0.196                     | 472.3729  |
| 47   | 32     | 16     | 46    | 31      | 15      | A    | 0           | 648516.441   | -0.196                     | 472.3729  |
| 47   | 32     | 15     | 46    | 31      | 15      | E    | 0           | 648556.075   | -0.012                     | 472.3649  |
| 49   | 31     | 19     | 48    | 30      | 18      | A    | 0           | 649286.650   | -0.240                     | 480.3743  |
| 49   | 31     | 18     | 48    | 30      | 19      | A    | 0           | 649286.650   | -0.240                     | 480.3743  |
| 49   | 31     | 18     | 48    | 30      | 18      | E    | 0           | 649322.427   | -0.433                     | 480.3651  |
| 41   | 41     | 1      | 40    | 40      | 0       | A    | 0           | 714443.402   | 0.132                      | 540.3372  |
| 41   | 41     | 0      | 40    | 40      | 1       | A    | 0           | 714443.402   | 0.132                      | 540.3372  |
| 60   | 31     | 30     | 59    | 30      | 29      | A    | 0           | 716003.309   | 0.185                      | 603.0778  |
| 60   | 31     | 29     | 59    | 30      | 30      | A    | 0           | 716003.309   | 0.185                      | 603.0778  |
| 45   | 39     | 7      | 44    | 38      | 6       | A    | 0           | 716159.092   | 0.357                      | 545.4977  |
| 45   | 39     | 6      | 44    | 38      | 7       | A    | 0           | 716159.092   | 0.357                      | 545.4977  |
| 45   | 39     | 6      | 44    | 38      | 6       | E    | 0           | 716191.648   | 0.085                      | 545.4874  |
| 62   | 30     | 32     | 61    | 29      | 33      | A    | 0           | 716405.510   | 0.114                      | 617.0924  |
| 62   | 30     | 33     | 61    | 29      | 32      | A    | 0           | 716405.510   | 0.114                      | 617.0924  |
| 66   | 28     | 38     | 65    | 27      | 39      | A    | 0           | 716553.725   | -0.171                     | 649.0997  |
| 66   | 28     | 39     | 65    | 27      | 38      | A    | 0           | 716553.725   | -0.171                     | 649.0997  |
| 64   | 29     | 36     | 63    | 28      | 35      | A    | 0           | 716615.062   | -0.042                     | 632.4237  |
| 64   | 29     | 35     | 63    | 28      | 36      | A    | 0           | 716615.062   | -0.042                     | 632.4237  |
| 47   | 38     | 9      | 46    | 37      | 10      | A    | 0           | 717007.628   | 0.267                      | 549.9081  |
| 47   | 38     | 10     | 46    | 37      | 9       | A    | 0           | 717007.628   | 0.267                      | 549.9081  |
| 47   | 38     | 9      | 46    | 37      | 10      | E    | 0           | 717035.868   | -0.091                     | 549.8968  |
| 47   | 38     | 10     | 46    | 37      | 9       | E    | 0           | 717054.007   | 0.030                      | 549.9090  |
| 49   | 37     | 13     | 48    | 36      | 12      | A    | 0           | 717843.856   | 0.035                      | 555.5443  |
| 49   | 37     | 12     | 48    | 36      | 13      | A    | 0           | 717843.856   | 0.035                      | 555.5443  |
| 49   | 37     | 13     | 48    | 36      | 13      | E    | 0           | 717867.616   | -0.151                     | 555.5323  |
| 49   | 37     | 12     | 48    | 36      | 12      | E    | 0           | 717890.691   | -0.021                     | 555.5436  |
| 51   | 36     | 15     | 50    | 35      | 16      | A    | 0           | 718661.551   | 0.063                      | 562.4118  |
| 51   | 36     | 16     | 50    | 35      | 15      | A    | 0           | 718661.551   | 0.063                      | 562.4118  |
| 51   | 36     | 16     | 50    | 35      | 16      | E    | 0           | 718680.701   | 0.277                      | 562.3991  |
| 51   | 36     | 15     | 50    | 35      | 15      | E    | 0           | 718707.999   | 0.039                      | 562.4095  |
| 53   | 35     | 19     | 52    | 34      | 18      | A    | 0           | 719451.628   | 0.177                      | 570.5170  |
| 53   | 35     | 18     | 52    | 34      | 19      | A    | 0           | 719451.628   | 0.177                      | 570.5170  |
| 55   | 34     | 21     | 54    | 33      | 22      | A    | 0           | 720201.822   | 0.093                      | 579.8679  |
| 55   | 34     | 22     | 54    | 33      | 21      | A    | 0           | 720201.822   | 0.093                      | 579.8679  |
| 55   | 34     | 22     | 54    | 33      | 22      | E    | 0           | 720209.824   | -0.011                     | 579.8547  |
| 42   | 41     | 2      | 41    | 40      | 1       | A    | 0           | 720573.291   | 0.170                      | 548.7412  |
| 42   | 41     | 1      | 41    | 40      | 2       | A    | 0           | 720573.291   | 0.170                      | 548.7412  |
| 59   | 32     | 27     | 58    | 31      | 28      | A    | 0           | 721513.334   | 0.338                      | 602.3472  |
| 59   | 32     | 28     | 58    | 31      | 27      | A    | 0           | 721513.334   | 0.338                      | 602.3472  |
| 46   | 39     | 8      | 45    | 38      | 7       | A    | 0           | 722285.297   | -0.008                     | 554.7330  |
| 46   | 39     | 7      | 45    | 38      | 8       | A    | 0           | 722285.297   | -0.008                     | 554.7330  |
| 46   | 39     | 7      | 45    | 38      | 7       | E    | 0           | 722318.085   | -0.005                     | 554.7226  |
| 46   | 39     | 8      | 45    | 38      | 8       | E    | 0           | 722330.995   | 0.053                      | 554.7355  |
| 48   | 38     | 10     | 47    | 37      | 11      | A    | 0           | 723130.319   | -0.158                     | 559.5608  |
| 48   | 38     | 11     | 47    | 37      | 10      | A    | 0           | 723130.319   | -0.158                     | 559.5608  |
| 52   | 36     | 16     | 51    | 35      | 17      | A    | 0           | 724772.051   | -0.030                     | 572.9043  |
| 52   | 36     | 17     | 51    | 35      | 16      | A    | 0           | 724772.051   | -0.030                     | 572.9043  |
| 47   | 39     | 9      | 46    | 38      | 8       | A    | 0           | 728410.917   | 0.321                      | 564.1753  |
| 47   | 39     | 8      | 46    | 38      | 9       | A    | 0           | 728410.917   | 0.321                      | 564.1753  |
| 49   | 38     | 11     | 48    | 37      | 12      | A    | 0           | 729251.752   | -0.108                     | 569.4211  |
| 49   | 38     | 12     | 48    | 37      | 11      | A    | 0           | 729251.752   | -0.108                     | 569.4211  |
| 49   | 38     | 11     | 48    | 37      | 12      | E    | 0           | 729280.585   | 0.244                      | 569.4098  |
| 49   | 38     | 12     | 48    | 37      | 11      | E    | 0           | 729298.454   | 0.060                      | 569.4220  |
| 51   | 37     | 15     | 50    | 36      | 14      | A    | 0           | 730077.425   | -0.014                     | 575.8958  |
| 51   | 37     | 14     | 50    | 36      | 15      | A    | 0           | 730077.425   | -0.014                     | 575.8958  |
| 51   | 37     | 15     | 50    | 36      | 15      | E    | 0           | 730101.229   | -0.013                     | 575.8837  |
| 51   | 37     | 14     | 50    | 36      | 14      | E    | 0           | 730124.421   | 0.209                      | 575.8951  |
| 53   | 36     | 17     | 52    | 35      | 18      | A    | 0           | 730879.636   | -0.044                     | 583.6054  |
| 53   | 36     | 18     | 52    | 35      | 17      | A    | 0           | 730879.636   | -0.044                     | 583.6054  |
| 53   | 36     | 17     | 52    | 35      | 17      | E    | 0           | 730926.077   | 0.087                      | 583.6031  |
| 55   | 35     | 21     | 54    | 34      | 20      | A    | 0           | 731648.544   | 0.195                      | 592.5571  |
| 55   | 35     | 20     | 54    | 34      | 21      | A    | 0           | 731648.544   | 0.195                      | 592.5571  |
| 42   | 42     | 0      | 41    | 41      | 1       | A    | 0           | 731972.199   | 0.129                      | 564.1684  |
| 42   | 42     | 1      | 41    | 41      | 0       | A    | 0           | 731972.199   | 0.129                      | 564.1684  |
| 42   | 42     | 1      | 41    | 41      | 1       | E    | 0           | 732010.863   | -0.215                     | 564.1754  |
| 42   | 42     | 0      | 41    | 41      | 0       | E    | 0           | 732014.442   | -0.081                     | 564.1617  |
| 57   | 34     | 23     | 56    | 33      | 24      | A    | 0           | 732370.020   | 0.276                      | 602.7595  |
| 57   | 34     | 24     | 56    | 33      | 23      | A    | 0           | 732370.020   | 0.276                      | 602.7595  |
| 57   | 34     | 24     | 56    | 33      | 24      | E    | 0           | 732377.987   | 0.369                      | 602.7463  |
| 57   | 34     | 23     | 56    | 33      | 23      | E    | 0           | 732412.974   | -0.004                     | 602.7542  |
| 7    | 3      | 4      | 6     | 2       | 5       | E    | 0           | 75823.428    | -0.020                     | 72.2759   |
| 7    | 3      | 4      | 6     | 2       | 5       | A    | 0           | 75830.518    | 0.030                      | 72.2643   |
| 56   | 37     | 20     | 55    | 36      | 19      | A    | 0           | 760614.789   | -0.055                     | 630.4209  |
| 56   | 37     | 19     | 55    | 36      | 20      | A    | 0           | 760614.789   | -0.055                     | 630.4209  |
| 56   | 37     | 20     | 55    | 36      | 20      | E    | 0           | 760637.969   | -0.218                     | 630.4089  |
| 56   | 37     | 19     | 55    | 36      | 19      | E    | 0           | 760661.264   | 0.037                      | 630.4201  |
| 58   | 36     | 22     | 57    | 35      | 23      | A    | 0           | 761365.163   | 0.052                      | 640.2465  |
| 58   | 36     | 23     | 57    | 35      | 22      | A    | 0           | 761365.163   | 0.052                      | 640.2465  |
| 58   | 36     | 23     | 57    | 35      | 23      | E    | 0           | 761383.600   | 0.267                      | 640.2340  |
| 58   | 36     | 22     | 57    | 35      | 22      | E    | 0           | 761410.957   | 0.056                      | 640.2442  |
| 45   | 43     | 3      | 44    | 42      | 2       | A    | 0           | 761753.200   | -0.278                     | 606.4167  |
| 45   | 43     | 2      | 44    | 42      | 3       | A    | 0           | 761753.200   | -0.278                     | 606.4167  |
| 45   | 43     | 3      | 44    | 42      | 3       | E    | 0           | 761789.142   | -0.013                     | 606.4249  |
| 45   | 43     | 2      | 44    | 42      | 2       | E    | 0           | 761797.927   | -0.018                     | 606.4114  |
| 60   | 35     | 26     | 59    | 34      | 25      | A    | 0           | 762064.116   | 0.191                      | 651.3265  |
| 60   | 35     | 25     | 59    | 34      | 26      | A    | 0           | 762064.116   | 0.191                      | 651.3265  |
| 60   | 35     | 26     | 59    | 34      | 26      | E    | 0           | 762076.676   | -0.051                     | 651.3137  |
| 47   | 42     | 5      | 46    | 41      | 6       | A    | 0           | 762608.595   | -0.431                     | 609.2757  |
| 47   | 42     | 6      | 46    | 41      | 5       | A    | 0           | 762608.595   | -0.431                     | 609.2757  |
| 47   | 42     | 6      | 46    | 41      | 6       | E    | 0           | 762647.772   | -0.234                     | 609.2826  |
| 47   | 42     | 5      | 46    | 41      | 5       | E    | 0           | 762651.206   | -0.129                     | 609.2690  |
| 62   | 34     | 28     | 61    | 33      | 29      | A    | 0           | 762692.322   | -0.067                     | 663.6716  |
| 62   | 34     | 29     | 61    | 33      | 28      | A    | 0           | 762692.322   | -0.067                     | 663.6716  |
| 62   | 34     | 29     | 61    | 33      | 29      | E    | 0           | 762699.047   | -0.495                     | 663.6587  |
| 62   | 34     | 28     | 61    | 33      | 28      | E    | 0           | 762734.425   | -0.339                     | 663.6663  |
| 49   | 41     | 9      | 48    | 40      | 8       | A    | 0           | 763458.860   | -0.449                     | 613.3542  |
| 49   | 41     | 8      | 48    | 40      | 9       | A    | 0           | 763458.860   | -0.449                     | 613.3542  |
| 70   | 30     | 40     | 69    | 29      | 41      | A    | 0           | 763834.299   | -0.028                     | 726.0209  |
| 70   | 30     | 41     | 69    | 29      | 40      | A    | 0           | 763834.299   | -0.028                     | 726.0209  |
| 68   | 31     | 38     | 67    | 30      | 38      | E    | 0           | 763842.087   | -0.644                     | 708.4351  |
| 68   | 31     | 38     | 67    | 30      | 37      | A    | 0           | 763853.023   | -0.092                     | 708.4469  |
| 68   | 31     | 37     | 67    | 30      | 38      | A    | 0           | 763853.023   | -0.092                     | 708.4469  |
| 70   | 30     | 40     | 69    | 29      | 40      | E    | 0           | 763860.678   | -0.144                     | 726.0112  |
| 51   | 40     | 11     | 50    | 39      | 12      | A    | 0           | 764300.437   | -0.182                     | 618.6561  |
| 51   | 40     | 12     | 50    | 39      | 11      | A    | 0           | 764300.437   | -0.182                     | 618.6561  |
| 51   | 40     | 11     | 50    | 39      | 11      | E    | 0           | 764336.879   | 0.045                      | 618.6469  |
| 51   | 40     | 12     | 50    | 39      | 12      | E    | 0           | 764344.015   | -0.473                     | 618.6601  |
| 53   | 39     | 15     | 52    | 38      | 14      | A    | 0           | 765127.856   | -0.158                     | 625.1859  |
| 53   | 39     | 14     | 52    | 38      | 15      | A    | 0           | 765127.856   | -0.158                     | 625.1859  |
| 53   | 39     | 14     | 52    | 38      | 14      | E    | 0           | 765160.568   | 0.202                      | 625.1756  |
| 53   | 39     | 15     | 52    | 38      | 15      | E    | 0           | 765173.369   | -0.011                     | 625.1883  |
| 55   | 38     | 17     | 54    | 37      | 18      | A    | 0           | 765934.376   | -0.569                     | 632.9492  |
| 55   | 38     | 18     | 54    | 37      | 17      | A    | 0           | 765934.376   | -0.569                     | 632.9492  |
| 55   | 38     | 17     | 54    | 37      | 18      | E    | 0           | 765962.824   | -0.127                     | 632.9379  |



| $J'$ | $K'_a$ | $K'_c$ | $J''$ | $K''_a$ | $K''_c$ | Sym. | $v_{tCH_3}$ | $\nu_{Obs.}$ | $\nu_{Obs.} - \nu_{Calc.}$ | $E_{low}$ |
|------|--------|--------|-------|---------|---------|------|-------------|--------------|----------------------------|-----------|
| 55   | 38     | 18     | 54    | 37      | 17      | E    | 0           | 765980.770   | -0.355                     | 632.9500  |
| 57   | 37     | 21     | 56    | 36      | 20      | A    | 0           | 766712.700   | -0.063                     | 641.9523  |
| 57   | 37     | 20     | 56    | 36      | 21      | A    | 0           | 766712.700   | -0.063                     | 641.9523  |
| 57   | 37     | 21     | 56    | 36      | 21      | E    | 0           | 766735.292   | -0.703                     | 641.9404  |
| 57   | 37     | 20     | 56    | 36      | 20      | E    | 0           | 766758.899   | -0.151                     | 641.9515  |
| 44   | 44     | 0      | 43    | 43      | 1       | A    | 0           | 767022.312   | -0.374                     | 613.5850  |
| 44   | 44     | 1      | 43    | 43      | 0       | A    | 0           | 767022.312   | -0.374                     | 613.5850  |
| 44   | 44     | 1      | 43    | 43      | 1       | E    | 0           | 767054.008   | -0.553                     | 613.5944  |
| 44   | 44     | 0      | 43    | 43      | 0       | E    | 0           | 767068.392   | -0.272                     | 613.5812  |
| 6    | 4      | 3      | 5     | 3       | 2       | A    | 0           | 76712.155    | 0.002                      | 72.0596   |
| 59   | 36     | 23     | 58    | 35      | 24      | A    | 0           | 767449.887   | -0.162                     | 652.2031  |
| 59   | 36     | 24     | 58    | 35      | 23      | A    | 0           | 767449.887   | -0.162                     | 652.2031  |
| 59   | 36     | 23     | 58    | 35      | 23      | E    | 0           | 767495.808   | 0.096                      | 652.2007  |
| 46   | 43     | 4      | 45    | 42      | 3       | A    | 0           | 767879.265   | -0.634                     | 615.6424  |
| 46   | 43     | 3      | 45    | 42      | 4       | A    | 0           | 767879.265   | -0.634                     | 615.6424  |
| 46   | 43     | 4      | 45    | 42      | 4       | E    | 0           | 767915.489   | -0.084                     | 615.6507  |
| 46   | 43     | 3      | 45    | 42      | 3       | E    | 0           | 767923.985   | -0.353                     | 615.6371  |
| 61   | 35     | 27     | 60    | 34      | 26      | A    | 0           | 768131.817   | 0.131                      | 663.7110  |
| 61   | 35     | 26     | 60    | 34      | 27      | A    | 0           | 768131.817   | 0.131                      | 663.7110  |
| 61   | 35     | 27     | 60    | 34      | 27      | E    | 0           | 768144.125   | -0.212                     | 663.6982  |
| 61   | 35     | 26     | 60    | 34      | 26      | E    | 0           | 768175.888   | -0.093                     | 663.7071  |
| 48   | 42     | 6      | 47    | 41      | 7       | A    | 0           | 768733.507   | -0.301                     | 618.9171  |
| 48   | 42     | 7      | 47    | 41      | 6       | A    | 0           | 768733.507   | -0.301                     | 618.9171  |
| 63   | 34     | 29     | 62    | 33      | 30      | A    | 0           | 768737.501   | -0.061                     | 676.4873  |
| 63   | 34     | 30     | 62    | 33      | 29      | A    | 0           | 768737.501   | -0.061                     | 676.4873  |
| 63   | 34     | 30     | 62    | 33      | 30      | E    | 0           | 768744.358   | -0.188                     | 676.4744  |
| 48   | 42     | 7      | 47    | 41      | 7       | E    | 0           | 768772.638   | -0.139                     | 618.9240  |
| 48   | 42     | 6      | 47    | 41      | 6       | E    | 0           | 768775.994   | -0.084                     | 618.9104  |
| 63   | 34     | 29     | 62    | 33      | 29      | E    | 0           | 768779.819   | 0.085                      | 676.4819  |
| 65   | 33     | 32     | 64    | 32      | 32      | E    | 0           | 769279.708   | -0.274                     | 690.5391  |
| 50   | 41     | 10     | 49    | 40      | 9       | A    | 0           | 769581.332   | -0.097                     | 623.4123  |
| 50   | 41     | 9      | 49    | 40      | 10      | A    | 0           | 769581.332   | -0.097                     | 623.4123  |
| 67   | 32     | 36     | 66    | 31      | 36      | E    | 0           | 769599.008   | -0.697                     | 705.8914  |
| 67   | 32     | 35     | 66    | 31      | 36      | A    | 0           | 769604.273   | -0.161                     | 705.9037  |
| 67   | 32     | 36     | 66    | 31      | 35      | A    | 0           | 769604.273   | -0.161                     | 705.9037  |
| 50   | 41     | 10     | 49    | 40      | 10      | E    | 0           | 769623.289   | 0.157                      | 623.4178  |
| 67   | 32     | 35     | 66    | 31      | 35      | E    | 0           | 769639.935   | -0.142                     | 705.8959  |
| 69   | 31     | 39     | 68    | 30      | 39      | E    | 0           | 769767.228   | -0.362                     | 722.5706  |
| 69   | 31     | 39     | 68    | 30      | 38      | A    | 0           | 769778.006   | -0.199                     | 722.5822  |
| 69   | 31     | 38     | 68    | 30      | 39      | A    | 0           | 769778.006   | -0.199                     | 722.5822  |
| 6    | 4      | 2      | 5     | 3       | 3       | A    | 0           | 77012.860    | 0.001                      | 72.0506   |
| 52   | 40     | 12     | 51    | 39      | 13      | A    | 0           | 770418.636   | -0.130                     | 629.1323  |
| 52   | 40     | 13     | 51    | 39      | 12      | A    | 0           | 770418.636   | -0.130                     | 629.1323  |
| 52   | 40     | 12     | 51    | 39      | 12      | E    | 0           | 770454.796   | -0.118                     | 629.1230  |
| 52   | 40     | 13     | 51    | 39      | 13      | E    | 0           | 770462.344   | -0.253                     | 629.1362  |
| 54   | 39     | 16     | 53    | 38      | 15      | A    | 0           | 771240.486   | -0.028                     | 636.0817  |
| 54   | 39     | 15     | 53    | 38      | 16      | A    | 0           | 771240.486   | -0.028                     | 636.0817  |
| 54   | 39     | 15     | 53    | 38      | 15      | E    | 0           | 771272.677   | -0.105                     | 636.0714  |
| 54   | 39     | 16     | 53    | 38      | 16      | E    | 0           | 771285.825   | 0.002                      | 636.0841  |
| 56   | 38     | 18     | 55    | 37      | 19      | A    | 0           | 772039.279   | 644.2663                   |           |
| 56   | 38     | 19     | 55    | 37      | 18      | A    | 0           | 772039.279   | -0.389                     | 644.2663  |
| 56   | 38     | 18     | 55    | 37      | 19      | E    | 0           | 772067.460   | -0.114                     | 644.2551  |
| 56   | 38     | 19     | 55    | 37      | 18      | E    | 0           | 772085.819   | 0.047                      | 644.2671  |
| 58   | 37     | 22     | 57    | 36      | 21      | A    | 0           | 772807.401   | 0.398                      | 653.6929  |
| 58   | 37     | 21     | 57    | 36      | 22      | A    | 0           | 772807.401   | 0.398                      | 653.6929  |
| 58   | 37     | 22     | 57    | 36      | 22      | E    | 0           | 772829.605   | -0.511                     | 653.6810  |
| 58   | 37     | 21     | 57    | 36      | 21      | E    | 0           | 772853.020   | -0.167                     | 653.6921  |
| 45   | 44     | 1      | 44    | 43      | 2       | A    | 0           | 773149.148   | -0.236                     | 622.6023  |
| 45   | 44     | 2      | 44    | 43      | 1       | A    | 0           | 773149.148   | -0.236                     | 622.6023  |
| 45   | 44     | 2      | 44    | 43      | 2       | E    | 0           | 773181.124   | -0.139                     | 622.6118  |
| 45   | 44     | 1      | 44    | 43      | 1       | E    | 0           | 773194.995   | -0.347                     | 622.5985  |
| 60   | 36     | 24     | 59    | 35      | 25      | A    | 0           | 773530.022   | -0.331                     | 664.3696  |
| 60   | 36     | 25     | 59    | 35      | 24      | A    | 0           | 773530.022   | -0.331                     | 664.3696  |
| 60   | 36     | 25     | 59    | 35      | 25      | E    | 0           | 773548.096   | -0.211                     | 664.3572  |
| 47   | 43     | 5      | 46    | 42      | 4       | A    | 0           | 774005.269   | -0.246                     | 625.0747  |
| 47   | 43     | 4      | 46    | 42      | 5       | A    | 0           | 774005.269   | -0.246                     | 625.0747  |
| 47   | 43     | 5      | 46    | 42      | 5       | E    | 0           | 774040.839   | -0.346                     | 625.0829  |
| 47   | 43     | 4      | 46    | 42      | 4       | E    | 0           | 774049.497   | -0.426                     | 625.0694  |
| 62   | 35     | 28     | 61    | 34      | 27      | A    | 0           | 774193.349   | -0.283                     | 676.3062  |
| 62   | 35     | 27     | 61    | 34      | 28      | A    | 0           | 774193.349   | -0.283                     | 676.3062  |
| 62   | 35     | 28     | 61    | 34      | 28      | E    | 0           | 774205.861   | -0.265                     | 676.2935  |
| 64   | 34     | 30     | 63    | 33      | 31      | A    | 0           | 774775.274   | -0.171                     | 689.5145  |
| 64   | 34     | 31     | 63    | 33      | 30      | A    | 0           | 774775.274   | -0.171                     | 689.5145  |
| 64   | 34     | 31     | 63    | 33      | 31      | E    | 0           | 774782.010   | -0.239                     | 689.5017  |
| 64   | 34     | 30     | 63    | 33      | 30      | E    | 0           | 774817.105   | -0.297                     | 689.5092  |
| 49   | 42     | 7      | 48    | 41      | 8       | A    | 0           | 774857.282   | -0.211                     | 628.7653  |
| 49   | 42     | 8      | 48    | 41      | 7       | A    | 0           | 774857.282   | -0.211                     | 628.7653  |
| 49   | 42     | 8      | 48    | 41      | 8       | E    | 0           | 774896.232   | -0.216                     | 628.7722  |
| 49   | 42     | 7      | 48    | 41      | 7       | E    | 0           | 774899.387   | -0.333                     | 628.7586  |
| 66   | 33     | 33     | 65    | 32      | 33      | E    | 0           | 775285.802   | -0.287                     | 704.0024  |
| 68   | 32     | 37     | 67    | 31      | 37      | E    | 0           | 775564.342   | -0.152                     | 719.7956  |
| 68   | 32     | 36     | 67    | 31      | 37      | A    | 0           | 775569.325   | -0.119                     | 719.8078  |
| 68   | 32     | 37     | 67    | 31      | 36      | A    | 0           | 775569.325   | -0.119                     | 719.8078  |
| 70   | 31     | 40     | 69    | 30      | 40      | E    | 0           | 775677.465   | -0.218                     | 736.9215  |
| 70   | 31     | 40     | 69    | 30      | 39      | A    | 0           | 775688.338   | -0.203                     | 736.9331  |
| 70   | 31     | 39     | 69    | 30      | 40      | A    | 0           | 775688.338   | -0.203                     | 736.9331  |
| 51   | 41     | 11     | 50    | 40      | 10      | A    | 0           | 775701.947   | -0.146                     | 633.6777  |
| 51   | 41     | 10     | 50    | 40      | 11      | A    | 0           | 775701.947   | -0.146                     | 633.6777  |
| 70   | 31     | 39     | 69    | 30      | 39      | E    | 0           | 775718.973   | -0.395                     | 736.9242  |
| 51   | 41     | 11     | 50    | 40      | 11      | E    | 0           | 775744.000   | 0.229                      | 633.6831  |
| 53   | 40     | 13     | 52    | 39      | 14      | A    | 0           | 776535.020   | 0.005                      | 639.8162  |
| 53   | 40     | 14     | 52    | 39      | 13      | A    | 0           | 776535.020   | 0.005                      | 639.8162  |
| 53   | 40     | 13     | 52    | 39      | 13      | E    | 0           | 776570.855   | -0.236                     | 639.8069  |
| 53   | 40     | 14     | 52    | 39      | 14      | E    | 0           | 776578.863   | 0.058                      | 639.8201  |
| 55   | 39     | 17     | 54    | 38      | 16      | A    | 0           | 777350.218   | -0.359                     | 647.1857  |
| 55   | 39     | 16     | 54    | 38      | 17      | A    | 0           | 777350.218   | -0.359                     | 647.1857  |
| 55   | 39     | 16     | 54    | 38      | 16      | E    | 0           | 777382.770   | 0.013                      | 647.1754  |
| 55   | 39     | 17     | 54    | 38      | 17      | E    | 0           | 777395.942   | 0.115                      | 647.1881  |
| 57   | 38     | 19     | 56    | 37      | 20      | A    | 0           | 778141.304   | 0.007                      | 655.7923  |
| 57   | 38     | 20     | 56    | 37      | 19      | A    | 0           | 778141.304   | 0.007                      | 655.7923  |
| 57   | 38     | 19     | 56    | 37      | 20      | E    | 0           | 778168.971   | -0.125                     | 655.7811  |
| 57   | 38     | 20     | 56    | 37      | 19      | E    | 0           | 778187.445   | 0.127                      | 655.7930  |
| 59   | 37     | 23     | 58    | 36      | 22      | A    | 0           | 778897.348   | 0.007                      | 665.6429  |
| 59   | 37     | 22     | 58    | 36      | 23      | A    | 0           | 778897.348   | 0.007                      | 665.6429  |
| 59   | 37     | 22     | 58    | 36      | 22      | E    | 0           | 778943.211   | -0.203                     | 665.6421  |
| 46   | 44     | 2      | 45    | 43      | 3       | A    | 0           | 779275.319   | -0.120                     | 631.8260  |
| 46   | 44     | 3      | 45    | 43      | 2       | A    | 0           | 779275.319   | -0.120                     | 631.8260  |
| 46   | 44     | 3      | 45    | 43      | 3       | E    | 0           | 779307.290   | -0.030                     | 631.8355  |
| 46   | 44     | 2      | 45    | 43      | 2       | E    | 0           | 779321.047   | -0.327                     | 631.8222  |
| 61   | 36     | 25     | 60    | 35      | 26      | A    | 0           | 779605.482   | -0.277                     | 676.7462  |
| 61   | 36     | 26     | 60    | 35      | 25      | A    | 0           | 779605.482   | -0.277                     | 676.7462  |
| 61   | 36     | 26     | 60    | 35      | 26      | E    | 0           | 779623.468   | -0.099                     | 676.7338  |
| 61   | 36     | 25     | 60    | 35      | 25      | E    | 0           | 779650.979   | -0.168                     | 676.7438  |
| 48   | 43     | 6      | 47    | 42      | 5       | A    | 0           | 780130.116   | -0.122                     | 634.7136  |
| 48   | 43     | 5      | 47    | 42      | 6       | A    | 0           | 780130.116   | -0.122                     | 634.7136  |
| 48   | 43     | 6      | 47    | 42      | 6       | E    | 0           | 780165.978   | 0.076                      | 634.7218  |



| $J'$ | $K'_a$ | $K'_c$ | $J''$ | $K''_a$ | $K''_c$ | Sym. | $v_{tCH_3}$ | $\nu_{Obs.}$ | $\nu_{Obs.} - \nu_{Calc.}$ | $E_{low}$ |
|------|--------|--------|-------|---------|---------|------|-------------|--------------|----------------------------|-----------|
| 48   | 43     | 5      | 47    | 42      | 5       | E    | 0           | 780174.546   | -0.066                     | 634.7083  |
| 63   | 35     | 29     | 62    | 34      | 28      | A    | 0           | 780249.925   | 0.477                      | 689.1123  |
| 63   | 35     | 28     | 62    | 34      | 29      | A    | 0           | 780249.925   | 0.477                      | 689.1123  |
| 63   | 35     | 29     | 62    | 34      | 29      | E    | 0           | 780261.798   | 0.024                      | 689.0996  |
| 63   | 35     | 28     | 62    | 34      | 28      | E    | 0           | 780293.228   | -0.163                     | 689.1084  |
| 65   | 34     | 31     | 64    | 33      | 32      | A    | 0           | 780805.757   | 0.106                      | 702.7537  |
| 65   | 34     | 32     | 64    | 33      | 31      | A    | 0           | 780805.757   | 0.106                      | 702.7537  |
| 65   | 34     | 32     | 64    | 33      | 32      | E    | 0           | 780812.220   | -0.048                     | 702.7409  |
| 65   | 34     | 31     | 64    | 33      | 31      | E    | 0           | 780847.214   | -0.167                     | 702.7483  |
| 50   | 42     | 8      | 49    | 41      | 9       | A    | 0           | 780980.260   | 0.281                      | 638.8205  |
| 50   | 42     | 9      | 49    | 41      | 8       | A    | 0           | 780980.260   | 0.281                      | 638.8205  |
| 50   | 42     | 9      | 49    | 41      | 9       | E    | 0           | 781018.877   | -0.041                     | 638.8274  |
| 50   | 42     | 8      | 49    | 41      | 8       | E    | 0           | 781022.336   | 0.179                      | 638.8138  |
| 67   | 33     | 34     | 66    | 32      | 34      | E    | 0           | 781282.389   | -0.157                     | 717.6787  |
| 69   | 32     | 38     | 68    | 31      | 38      | E    | 0           | 781516.959   | -0.142                     | 733.9141  |
| 69   | 32     | 37     | 68    | 31      | 38      | A    | 0           | 781522.452   | 0.168                      | 733.9263  |
| 69   | 32     | 38     | 68    | 31      | 37      | A    | 0           | 781522.452   | 0.168                      | 733.9263  |
| 69   | 32     | 37     | 68    | 31      | 37      | E    | 0           | 781557.157   | -0.098                     | 733.9184  |
| 52   | 41     | 12     | 51    | 40      | 11      | A    | 0           | 781821.193   | 0.014                      | 644.1504  |
| 52   | 41     | 11     | 51    | 40      | 12      | A    | 0           | 781821.193   | 0.014                      | 644.1504  |
| 52   | 41     | 11     | 51    | 40      | 11      | E    | 0           | 781860.419   | -0.136                     | 644.1424  |
| 52   | 41     | 12     | 51    | 40      | 12      | E    | 0           | 781863.378   | 0.550                      | 644.1559  |
| 54   | 40     | 14     | 53    | 39      | 15      | A    | 0           | 782649.077   | -0.148                     | 650.7079  |
| 54   | 40     | 15     | 53    | 39      | 14      | A    | 0           | 782649.077   | -0.148                     | 650.7079  |
| 54   | 40     | 14     | 53    | 39      | 14      | E    | 0           | 782685.297   | 0.075                      | 650.6986  |
| 54   | 40     | 15     | 53    | 39      | 15      | E    | 0           | 782692.783   | -0.188                     | 650.7118  |
| 56   | 39     | 18     | 55    | 38      | 17      | A    | 0           | 783458.103   | 0.066                      | 658.4980  |
| 56   | 39     | 17     | 55    | 38      | 18      | A    | 0           | 783458.103   | 0.066                      | 658.4980  |
| 56   | 39     | 17     | 55    | 38      | 17      | E    | 0           | 783490.031   | -0.091                     | 658.4877  |
| 56   | 39     | 18     | 55    | 38      | 18      | E    | 0           | 783503.380   | 0.157                      | 658.5003  |
| 58   | 38     | 20     | 57    | 37      | 21      | A    | 0           | 784239.836   | 0.201                      | 667.5271  |
| 58   | 38     | 21     | 57    | 37      | 20      | A    | 0           | 784239.836   | 0.201                      | 667.5271  |
| 58   | 38     | 20     | 57    | 37      | 21      | E    | 0           | 784267.334   | 0.015                      | 667.5159  |
| 58   | 38     | 21     | 57    | 37      | 20      | E    | 0           | 784285.303   | -0.264                     | 667.5278  |
| 45   | 45     | 1      | 44    | 44      | 0       | A    | 0           | 784544.233   | -0.124                     | 639.1701  |
| 45   | 45     | 0      | 44    | 44      | 1       | A    | 0           | 784544.233   | -0.124                     | 639.1701  |
| 45   | 45     | 1      | 44    | 44      | 1       | E    | 0           | 784572.046   | 0.036                      | 639.1806  |
| 45   | 45     | 0      | 44    | 44      | 0       | E    | 0           | 784590.975   | -0.215                     | 639.1678  |
| 60   | 37     | 24     | 59    | 36      | 23      | A    | 0           | 784983.442   | -0.101                     | 677.8025  |
| 60   | 37     | 23     | 59    | 36      | 24      | A    | 0           | 784983.442   | -0.101                     | 677.8025  |
| 60   | 37     | 23     | 59    | 36      | 23      | E    | 0           | 785029.698   | 0.198                      | 677.8016  |
| 47   | 44     | 3      | 46    | 43      | 4       | A    | 0           | 785400.931   | 0.158                      | 641.2561  |
| 47   | 44     | 4      | 46    | 43      | 3       | A    | 0           | 785400.931   | 0.158                      | 641.2561  |
| 47   | 44     | 4      | 46    | 43      | 4       | E    | 0           | 785432.768   | 0.115                      | 641.2656  |
| 47   | 44     | 3      | 46    | 43      | 3       | E    | 0           | 785446.606   | -0.075                     | 641.2523  |
| 62   | 36     | 26     | 61    | 35      | 27      | A    | 0           | 785676.224   | 0.231                      | 689.3331  |
| 62   | 36     | 27     | 61    | 35      | 26      | A    | 0           | 785676.224   | 0.231                      | 689.3331  |
| 62   | 36     | 27     | 61    | 35      | 27      | E    | 0           | 785693.752   | 0.106                      | 689.3207  |
| 62   | 36     | 26     | 61    | 35      | 26      | E    | 0           | 785720.947   | -0.282                     | 689.3307  |
| 49   | 43     | 7      | 48    | 42      | 6       | A    | 0           | 786253.921   | -0.055                     | 644.5593  |
| 49   | 43     | 6      | 48    | 42      | 7       | A    | 0           | 786253.921   | -0.055                     | 644.5593  |
| 49   | 43     | 7      | 48    | 42      | 7       | E    | 0           | 786289.835   | 0.202                      | 644.5675  |
| 64   | 35     | 30     | 63    | 34      | 30      | E    | 0           | 786310.805   | -0.147                     | 702.1170  |
| 66   | 34     | 32     | 65    | 33      | 33      | A    | 0           | 786827.873   | 0.092                      | 716.2049  |
| 66   | 34     | 33     | 65    | 33      | 32      | A    | 0           | 786827.873   | 0.092                      | 716.2049  |
| 66   | 34     | 33     | 65    | 33      | 33      | E    | 0           | 786833.988   | -0.211                     | 716.1922  |
| 66   | 34     | 32     | 65    | 33      | 32      | E    | 0           | 786869.189   | -0.084                     | 716.1996  |
| 51   | 42     | 9      | 50    | 41      | 10      | A    | 0           | 787100.989   | -0.165                     | 649.0828  |
| 51   | 42     | 10     | 50    | 41      | 9       | A    | 0           | 787100.989   | -0.165                     | 649.0828  |
| 51   | 42     | 10     | 50    | 41      | 10      | E    | 0           | 787140.270   | 0.195                      | 649.0897  |
| 51   | 42     | 9      | 50    | 41      | 9       | E    | 0           | 787143.586   | 0.305                      | 649.0761  |
| 68   | 33     | 35     | 67    | 32      | 35      | E    | 0           | 787268.672   | -0.187                     | 731.5683  |
| 70   | 32     | 38     | 69    | 31      | 38      | E    | 0           | 787496.660   | -0.278                     | 748.2515  |
| 53   | 41     | 13     | 52    | 40      | 12      | A    | 0           | 787938.842   | 0.282                      | 654.8307  |
| 53   | 41     | 12     | 52    | 40      | 13      | A    | 0           | 787938.842   | 0.282                      | 654.8307  |
| 53   | 41     | 12     | 52    | 40      | 12      | E    | 0           | 787977.590   | -0.279                     | 654.8227  |
| 53   | 41     | 13     | 52    | 40      | 13      | E    | 0           | 787980.513   | 0.335                      | 654.8361  |
| 55   | 40     | 15     | 54    | 39      | 16      | A    | 0           | 788761.125   | -0.122                     | 661.8075  |
| 55   | 40     | 16     | 54    | 39      | 15      | A    | 0           | 788761.125   | -0.122                     | 661.8075  |
| 55   | 40     | 15     | 54    | 39      | 15      | E    | 0           | 788796.957   | -0.204                     | 661.7983  |
| 55   | 40     | 16     | 54    | 39      | 16      | E    | 0           | 788805.264   | 0.319                      | 661.8114  |
| 57   | 39     | 19     | 56    | 38      | 18      | A    | 0           | 789562.904   | 0.182                      | 670.0188  |
| 57   | 39     | 18     | 56    | 38      | 19      | A    | 0           | 789562.904   | 0.182                      | 670.0188  |
| 57   | 39     | 18     | 56    | 38      | 18      | E    | 0           | 789594.690   | -0.014                     | 670.0085  |
| 57   | 39     | 19     | 56    | 38      | 19      | E    | 0           | 789607.959   | 0.121                      | 670.0211  |
| 59   | 38     | 21     | 58    | 37      | 22      | A    | 0           | 790334.537   | 0.060                      | 679.4710  |
| 59   | 38     | 22     | 58    | 37      | 21      | A    | 0           | 790334.537   | 0.060                      | 679.4710  |
| 59   | 38     | 21     | 58    | 37      | 22      | E    | 0           | 790361.906   | -0.134                     | 679.4598  |
| 46   | 45     | 2      | 45    | 44      | 1       | A    | 0           | 790669.635   | -0.320                     | 648.3918  |
| 46   | 45     | 1      | 45    | 44      | 2       | A    | 0           | 790669.635   | -0.320                     | 648.3918  |
| 46   | 45     | 2      | 45    | 44      | 2       | E    | 0           | 790697.852   | 0.239                      | 648.4023  |
| 46   | 45     | 1      | 45    | 44      | 1       | E    | 0           | 790716.579   | -0.190                     | 648.3896  |
| 61   | 37     | 25     | 60    | 36      | 24      | A    | 0           | 791065.479   | 0.108                      | 690.1718  |
| 61   | 37     | 24     | 60    | 36      | 25      | A    | 0           | 791065.479   | 0.108                      | 690.1718  |
| 61   | 37     | 25     | 60    | 36      | 25      | E    | 0           | 791087.777   | -0.305                     | 690.1600  |
| 61   | 37     | 24     | 60    | 36      | 24      | E    | 0           | 791111.424   | 0.220                      | 690.1709  |
| 48   | 44     | 4      | 47    | 43      | 5       | A    | 0           | 791525.506   | 0.204                      | 650.8927  |
| 48   | 44     | 5      | 47    | 43      | 4       | A    | 0           | 791525.506   | 0.204                      | 650.8927  |
| 48   | 44     | 5      | 47    | 43      | 5       | E    | 0           | 791557.406   | 0.225                      | 650.9022  |
| 48   | 44     | 4      | 47    | 43      | 4       | E    | 0           | 791571.068   | -0.113                     | 650.8889  |
| 63   | 36     | 27     | 62    | 35      | 28      | A    | 0           | 791741.083   | 0.313                      | 702.1305  |
| 63   | 36     | 28     | 62    | 35      | 27      | A    | 0           | 791741.083   | 0.313                      | 702.1305  |
| 63   | 36     | 28     | 62    | 35      | 28      | E    | 0           | 791758.190   | -0.068                     | 702.1182  |
| 63   | 36     | 27     | 62    | 35      | 27      | E    | 0           | 791785.876   | 0.031                      | 702.1281  |
| 65   | 35     | 31     | 64    | 34      | 30      | A    | 0           | 792341.368   | 0.013                      | 715.3583  |
| 65   | 35     | 30     | 64    | 34      | 31      | A    | 0           | 792341.368   | 0.013                      | 715.3583  |
| 65   | 35     | 31     | 64    | 34      | 31      | E    | 0           | 792353.329   | 0.010                      | 715.3457  |
| 50   | 43     | 8      | 49    | 42      | 7       | A    | 0           | 792376.659   | 0.026                      | 654.6117  |
| 50   | 43     | 7      | 49    | 42      | 8       | A    | 0           | 792376.659   | 0.026                      | 654.6117  |
| 65   | 35     | 30     | 64    | 34      | 30      | E    | 0           | 792384.991   | 0.087                      | 715.3543  |
| 50   | 43     | 8      | 49    | 42      | 8       | E    | 0           | 792412.623   | 0.343                      | 654.6199  |
| 50   | 43     | 7      | 49    | 42      | 7       | E    | 0           | 792420.986   | 0.060                      | 654.6064  |
| 67   | 34     | 33     | 66    | 33      | 34      | A    | 0           | 792841.425   | 0.003                      | 729.8686  |
| 67   | 34     | 34     | 66    | 33      | 33      | A    | 0           | 792841.425   | 0.003                      | 729.8686  |
| 69   | 33     | 37     | 68    | 32      | 36      | A    | 0           | 793206.468   | 0.094                      | 745.6781  |
| 69   | 33     | 36     | 68    | 32      | 37      | A    | 0           | 793206.468   | 0.094                      | 745.6781  |
| 69   | 33     | 37     | 68    | 32      | 37      | E    | 0           | 793206.468   | -0.207                     | 745.6657  |
| 52   | 42     | 10     | 51    | 41      | 11      | A    | 0           | 793221.065   | 0.155                      | 659.5523  |
| 52   | 42     | 11     | 51    | 41      | 10      | A    | 0           | 793221.065   | 0.155                      | 659.5523  |
| 69   | 33     | 36     | 68    | 32      | 36      | E    | 0           | 793244.463   | -0.048                     | 745.6714  |
| 52   | 42     | 11     | 51    | 41      | 11      | E    | 0           | 793260.046   | 0.237                      | 659.5592  |
| 52   | 42     | 10     | 51    | 41      | 10      | E    | 0           | 793263.033   | 0.053                      | 659.5456  |
| 54   | 41     | 14     | 53    | 40      | 13      | A    | 0           | 794054.073   | -0.032                     | 665.7186  |
| 54   | 41     | 13     | 53    | 40      | 14      | A    | 0           | 794054.073   | -0.032                     | 665.7186  |
| 54   | 41     | 13     | 53    | 40      | 13      | E    | 0           | 794092.758   | -0.584                     | 665.7105  |
| 54   | 41     | 14     | 53    | 40      | 14      | E    | 0           | 794095.912   | 0.224                      | 665.7240  |



| $J'$ | $K'_a$ | $K'_c$ | $J''$ | $K''_a$ | $K''_c$ | Sym. | $v_{tCH_3}$ | $\nu_{Obs.}$ | $\nu_{Obs.} - \nu_{Calc.}$ | $E_{low}$ |
|------|--------|--------|-------|---------|---------|------|-------------|--------------|----------------------------|-----------|
| 56   | 40     | 16     | 55    | 39      | 17      | A    | 0           | 794870.893   | -0.036                     | 673.1153  |
| 56   | 40     | 17     | 55    | 39      | 16      | A    | 0           | 794870.893   | -0.036                     | 673.1153  |
| 56   | 40     | 16     | 55    | 39      | 16      | E    | 0           | 794906.753   | -0.001                     | 673.1061  |
| 56   | 40     | 17     | 55    | 39      | 17      | E    | 0           | 794914.901   | 0.327                      | 673.1192  |
| 58   | 39     | 20     | 57    | 38      | 19      | A    | 0           | 795664.595   | 0.143                      | 681.7483  |
| 58   | 39     | 19     | 57    | 38      | 20      | A    | 0           | 795664.595   | 0.143                      | 681.7483  |
| 58   | 39     | 19     | 57    | 38      | 19      | E    | 0           | 795696.272   | -0.054                     | 681.7380  |
| 58   | 39     | 20     | 57    | 38      | 20      | E    | 0           | 795709.726   | 0.232                      | 681.7506  |
| 60   | 38     | 22     | 59    | 37      | 23      | A    | 0           | 796425.604   | -0.013                     | 691.6241  |
| 60   | 38     | 23     | 59    | 37      | 22      | A    | 0           | 796425.604   | -0.013                     | 691.6241  |
| 60   | 38     | 22     | 59    | 37      | 23      | E    | 0           | 796452.964   | -0.087                     | 691.6130  |
| 60   | 38     | 23     | 59    | 37      | 22      | E    | 0           | 796471.678   | 0.324                      | 691.6248  |
| 47   | 45     | 3      | 46    | 44      | 2       | A    | 0           | 796794.704   | -0.197                     | 657.8199  |
| 47   | 45     | 2      | 46    | 44      | 3       | A    | 0           | 796794.704   | -0.197                     | 657.8199  |
| 47   | 45     | 3      | 46    | 44      | 3       | E    | 0           | 796822.742   | 0.178                      | 657.8304  |
| 47   | 45     | 2      | 46    | 44      | 2       | E    | 0           | 796841.467   | -0.225                     | 657.8176  |
| 62   | 37     | 26     | 61    | 36      | 25      | A    | 0           | 797142.857   | 0.277                      | 702.7511  |
| 62   | 37     | 25     | 61    | 36      | 26      | A    | 0           | 797142.857   | 0.277                      | 702.7511  |
| 62   | 37     | 26     | 61    | 36      | 26      | E    | 0           | 797164.822   | -0.318                     | 702.7392  |
| 62   | 37     | 25     | 61    | 36      | 25      | E    | 0           | 797188.411   | 0.132                      | 702.7502  |
| 49   | 44     | 5      | 48    | 43      | 6       | A    | 0           | 797648.923   | -0.020                     | 660.7360  |
| 49   | 44     | 6      | 48    | 43      | 5       | A    | 0           | 797648.923   | -0.020                     | 660.7360  |
| 49   | 44     | 6      | 48    | 43      | 6       | E    | 0           | 797680.919   | 0.099                      | 660.7454  |
| 49   | 44     | 5      | 48    | 43      | 5       | E    | 0           | 797695.334   | 0.546                      | 660.7321  |
| 64   | 36     | 28     | 63    | 35      | 29      | A    | 0           | 797799.923   | 0.127                      | 715.1386  |
| 64   | 36     | 29     | 63    | 35      | 28      | A    | 0           | 797799.923   | 0.127                      | 715.1386  |
| 64   | 36     | 29     | 63    | 35      | 29      | E    | 0           | 797817.019   | -0.094                     | 715.1264  |
| 64   | 36     | 28     | 63    | 35      | 28      | E    | 0           | 797845.084   | 0.381                      | 715.1362  |
| 66   | 35     | 32     | 65    | 34      | 31      | A    | 0           | 798376.775   | 0.022                      | 728.7985  |
| 66   | 35     | 31     | 65    | 34      | 32      | A    | 0           | 798376.775   | 0.022                      | 728.7985  |
| 66   | 35     | 32     | 65    | 34      | 32      | E    | 0           | 798388.260   | -0.261                     | 728.7860  |
| 66   | 35     | 31     | 65    | 34      | 31      | E    | 0           | 798419.929   | -0.160                     | 728.7946  |
| 51   | 43     | 9      | 50    | 42      | 8       | A    | 0           | 798497.972   | -0.137                     | 664.8712  |
| 51   | 43     | 8      | 50    | 42      | 9       | A    | 0           | 798497.972   | -0.137                     | 664.8712  |
| 51   | 43     | 9      | 50    | 42      | 9       | E    | 0           | 798533.796   | 0.050                      | 664.8794  |
| 51   | 43     | 8      | 50    | 42      | 8       | E    | 0           | 798542.368   | 0.013                      | 664.8659  |
| 68   | 34     | 34     | 67    | 33      | 35      | A    | 0           | 798846.030   | -0.111                     | 743.7449  |
| 68   | 34     | 35     | 67    | 33      | 34      | A    | 0           | 798846.030   | -0.111                     | 743.7449  |
| 68   | 34     | 35     | 67    | 33      | 35      | E    | 0           | 798852.209   | 0.080                      | 743.7324  |
| 70   | 33     | 38     | 69    | 32      | 37      | A    | 0           | 799171.309   | 0.152                      | 759.9950  |
| 70   | 33     | 37     | 69    | 32      | 38      | A    | 0           | 799171.309   | 0.152                      | 759.9950  |
| 53   | 42     | 11     | 52    | 41      | 12      | A    | 0           | 799339.133   | 0.006                      | 670.2292  |
| 53   | 42     | 12     | 52    | 41      | 11      | A    | 0           | 799339.133   | 0.006                      | 670.2292  |
| 53   | 42     | 12     | 52    | 41      | 12      | E    | 0           | 799378.119   | 0.114                      | 670.2360  |
| 53   | 42     | 11     | 52    | 41      | 11      | E    | 0           | 799381.227   | 0.091                      | 670.2225  |
| 55   | 41     | 15     | 54    | 40      | 14      | A    | 0           | 800167.722   | 0.041                      | 676.8142  |
| 55   | 41     | 14     | 54    | 40      | 15      | A    | 0           | 800167.722   | 0.041                      | 676.8142  |
| 55   | 41     | 14     | 54    | 40      | 14      | E    | 0           | 800206.756   | -0.083                     | 676.8062  |
| 55   | 41     | 15     | 54    | 40      | 15      | E    | 0           | 800209.570   | 0.345                      | 676.8196  |
| 57   | 40     | 17     | 56    | 39      | 18      | A    | 0           | 800978.221   | 0.106                      | 684.6314  |
| 57   | 40     | 18     | 56    | 39      | 17      | A    | 0           | 800978.221   | 0.106                      | 684.6314  |
| 57   | 40     | 17     | 56    | 39      | 17      | E    | 0           | 801013.938   | 0.095                      | 684.6221  |
| 57   | 40     | 18     | 56    | 39      | 18      | E    | 0           | 801022.186   | 0.483                      | 684.6352  |
| 59   | 39     | 21     | 58    | 38      | 20      | A    | 0           | 801763.189   | 0.145                      | 693.6865  |
| 59   | 39     | 20     | 58    | 38      | 21      | A    | 0           | 801763.189   | 0.145                      | 693.6865  |
| 59   | 39     | 20     | 58    | 38      | 20      | E    | 0           | 801794.774   | -0.029                     | 693.6763  |
| 46   | 46     | 0      | 45    | 45      | 1       | A    | 0           | 802063.485   | -0.018                     | 665.3397  |
| 46   | 46     | 1      | 45    | 45      | 0       | A    | 0           | 802063.485   | -0.018                     | 665.3397  |
| 46   | 46     | 1      | 45    | 45      | 1       | E    | 0           | 802086.597   | 0.030                      | 665.3511  |
| 46   | 46     | 0      | 45    | 45      | 0       | E    | 0           | 802110.660   | 0.096                      | 665.3390  |
| 61   | 38     | 23     | 60    | 37      | 24      | A    | 0           | 802513.021   | 0.183                      | 703.9867  |
| 61   | 38     | 24     | 60    | 37      | 23      | A    | 0           | 802513.021   | 0.183                      | 703.9867  |
| 61   | 38     | 24     | 60    | 37      | 23      | E    | 0           | 802558.682   | 0.215                      | 703.9874  |
| 48   | 45     | 4      | 47    | 44      | 3       | A    | 0           | 802919.033   | -0.089                     | 667.4543  |
| 48   | 45     | 3      | 47    | 44      | 4       | A    | 0           | 802919.033   | -0.089                     | 667.4543  |
| 48   | 45     | 4      | 47    | 44      | 4       | E    | 0           | 802946.899   | 0.112                      | 667.4648  |
| 48   | 45     | 3      | 47    | 44      | 3       | E    | 0           | 802966.035   | 0.147                      | 667.4520  |
| 63   | 37     | 27     | 62    | 36      | 26      | A    | 0           | 803214.862   | -0.050                     | 715.5404  |
| 63   | 37     | 26     | 62    | 36      | 27      | A    | 0           | 803214.862   | -0.050                     | 715.5404  |
| 63   | 37     | 27     | 62    | 36      | 27      | E    | 0           | 803237.166   | -0.149                     | 715.5287  |
| 63   | 37     | 26     | 62    | 36      | 26      | E    | 0           | 803260.574   | 0.102                      | 715.5395  |
| 50   | 44     | 6      | 49    | 43      | 7       | A    | 0           | 803771.463   | -0.144                     | 670.7859  |
| 50   | 44     | 7      | 49    | 43      | 6       | A    | 0           | 803771.463   | -0.144                     | 670.7859  |
| 50   | 44     | 7      | 49    | 43      | 7       | E    | 0           | 803803.481   | 0.001                      | 670.7953  |
| 50   | 44     | 6      | 49    | 43      | 6       | E    | 0           | 803817.303   | -0.112                     | 670.7821  |
| 65   | 36     | 29     | 64    | 35      | 30      | A    | 0           | 803852.890   | 0.121                      | 728.3577  |
| 65   | 36     | 30     | 64    | 35      | 29      | A    | 0           | 803852.890   | 0.121                      | 728.3577  |
| 65   | 36     | 30     | 64    | 35      | 30      | E    | 0           | 803870.280   | 0.377                      | 728.3455  |
| 67   | 35     | 33     | 66    | 34      | 33      | E    | 0           | 804415.975   | -0.219                     | 742.4382  |
| 67   | 35     | 32     | 66    | 34      | 32      | E    | 0           | 804447.691   | -0.052                     | 742.4467  |
| 52   | 43     | 10     | 51    | 42      | 9       | A    | 0           | 804618.554   | 0.252                      | 675.3377  |
| 52   | 43     | 9      | 51    | 42      | 10      | A    | 0           | 804618.554   | 0.252                      | 675.3377  |
| 52   | 43     | 10     | 51    | 42      | 10      | E    | 0           | 804653.826   | -0.098                     | 675.3458  |
| 52   | 43     | 9      | 51    | 42      | 9       | E    | 0           | 804662.669   | 0.173                      | 675.3324  |
| 69   | 34     | 35     | 68    | 33      | 36      | A    | 0           | 804841.556   | 0.063                      | 757.8341  |
| 69   | 34     | 36     | 68    | 33      | 35      | A    | 0           | 804841.556   | 0.063                      | 757.8341  |
| 69   | 34     | 36     | 68    | 33      | 36      | E    | 0           | 804847.176   | -0.075                     | 757.8217  |
| 69   | 34     | 35     | 68    | 33      | 35      | E    | 0           | 804881.877   | -0.312                     | 757.8287  |
| 54   | 42     | 12     | 53    | 41      | 13      | A    | 0           | 805455.746   | 0.057                      | 681.1135  |
| 54   | 42     | 13     | 53    | 41      | 12      | A    | 0           | 805455.746   | 0.057                      | 681.1135  |
| 54   | 42     | 13     | 53    | 41      | 13      | E    | 0           | 805494.393   | -0.148                     | 681.1203  |
| 54   | 42     | 12     | 53    | 41      | 12      | E    | 0           | 805497.678   | 0.047                      | 681.1068  |
| 56   | 41     | 16     | 55    | 40      | 15      | A    | 0           | 806279.239   | 0.092                      | 688.1178  |
| 56   | 41     | 15     | 55    | 40      | 16      | A    | 0           | 806279.239   | 0.092                      | 688.1178  |
| 56   | 41     | 15     | 55    | 40      | 15      | E    | 0           | 806317.827   | -0.394                     | 688.1097  |
| 56   | 41     | 16     | 55    | 40      | 16      | E    | 0           | 806321.174   | 0.525                      | 688.1231  |
| 58   | 40     | 18     | 57    | 39      | 19      | A    | 0           | 807082.804   | 0.164                      | 696.3558  |
| 58   | 40     | 19     | 57    | 39      | 18      | A    | 0           | 807082.804   | 0.164                      | 696.3558  |
| 58   | 40     | 18     | 57    | 39      | 18      | E    | 0           | 807118.251   | -0.015                     | 696.3466  |
| 58   | 40     | 19     | 57    | 39      | 19      | E    | 0           | 807126.120   | -0.046                     | 696.3596  |
| 60   | 39     | 22     | 59    | 38      | 21      | A    | 0           | 807858.167   | -0.142                     | 705.8337  |
| 60   | 39     | 21     | 59    | 38      | 22      | A    | 0           | 807858.167   | -0.142                     | 705.8337  |
| 60   | 39     | 21     | 59    | 38      | 21      | E    | 0           | 807889.700   | -0.245                     | 705.8235  |
| 60   | 39     | 22     | 59    | 38      | 22      | E    | 0           | 807902.845   | -0.341                     | 705.8360  |
| 47   | 46     | 1      | 46    | 45      | 2       | A    | 0           | 808187.909   | -0.065                     | 674.7657  |
| 47   | 46     | 2      | 46    | 45      | 1       | A    | 0           | 808187.909   | -0.065                     | 674.7657  |
| 47   | 46     | 2      | 46    | 45      | 2       | E    | 0           | 808210.974   | -0.072                     | 674.7772  |
| 47   | 46     | 1      | 46    | 45      | 1       | E    | 0           | 808235.069   | 0.051                      | 674.7650  |
| 62   | 38     | 24     | 61    | 37      | 25      | A    | 0           | 808596.104   | 0.187                      | 716.5589  |
| 62   | 38     | 25     | 61    | 37      | 24      | A    | 0           | 808596.104   | 0.187                      | 716.5589  |
| 62   | 38     | 24     | 61    | 37      | 25      | E    | 0           | 808622.990   | -0.080                     | 716.5478  |
| 62   | 38     | 25     | 61    | 37      | 24      | E    | 0           | 808641.605   | 0.172                      | 716.5596  |
| 49   | 45     | 5      | 48    | 44      | 4       | A    | 0           | 809042.825   | 0.288                      | 677.2952  |
| 49   | 45     | 4      | 48    | 44      | 5       | A    | 0           | 809042.825   | 0.288                      | 677.2952  |
| 49   | 45     | 5      | 48    | 44      | 5       | E    | 0           | 809070.381   | 0.176                      | 677.3057  |
| 49   | 45     | 4      | 48    | 44      | 4       | E    | 0           | 809089.134   | -0.140                     | 677.2929  |



| $J'$ | $K'_a$ | $K'_c$ | $J''$ | $K''_a$ | $K''_c$ | Sym. | $v_{tCH_3}$ | $\nu_{Obs.}$ | $\nu_{Obs.} - \nu_{Calc.}$ | $E_{low}$ |
|------|--------|--------|-------|---------|---------|------|-------------|--------------|----------------------------|-----------|
| 64   | 37     | 28     | 63    | 36      | 27      | A    | 0           | 809282.134   | 0.026                      | 728.5401  |
| 64   | 37     | 27     | 63    | 36      | 28      | A    | 0           | 809282.134   | 0.026                      | 728.5401  |
| 64   | 37     | 28     | 63    | 36      | 28      | E    | 0           | 809304.434   | 0.092                      | 728.5284  |
| 64   | 37     | 27     | 63    | 36      | 27      | E    | 0           | 809327.390   | -0.130                     | 728.5392  |
| 51   | 44     | 7      | 50    | 43      | 8       | A    | 0           | 809893.198   | -0.004                     | 681.0426  |
| 51   | 44     | 8      | 50    | 43      | 7       | A    | 0           | 809893.198   | -0.004                     | 681.0426  |
| 66   | 36     | 30     | 65    | 35      | 31      | A    | 0           | 809899.559   | 0.183                      | 741.7879  |
| 66   | 36     | 31     | 65    | 35      | 30      | A    | 0           | 809899.559   | 0.183                      | 741.7879  |
| 66   | 36     | 31     | 65    | 35      | 31      | E    | 0           | 809915.888   | -0.429                     | 741.7757  |
| 51   | 44     | 8      | 50    | 43      | 8       | E    | 0           | 809925.300   | 0.229                      | 681.0520  |
| 51   | 44     | 7      | 50    | 43      | 7       | E    | 0           | 809939.063   | 0.094                      | 681.0388  |
| 66   | 36     | 30     | 65    | 35      | 30      | E    | 0           | 809943.910   | -0.004                     | 741.7854  |
| 68   | 35     | 34     | 67    | 34      | 33      | A    | 0           | 810424.566   | -0.048                     | 756.3149  |
| 68   | 35     | 33     | 67    | 34      | 34      | A    | 0           | 810424.566   | -0.048                     | 756.3149  |
| 68   | 35     | 34     | 67    | 34      | 34      | E    | 0           | 810435.843   | -0.115                     | 756.3025  |
| 68   | 35     | 33     | 67    | 34      | 33      | E    | 0           | 810467.445   | -0.042                     | 756.3109  |
| 53   | 43     | 11     | 52    | 42      | 10      | A    | 0           | 810736.878   | -0.227                     | 686.0113  |
| 53   | 43     | 10     | 52    | 42      | 11      | A    | 0           | 810736.878   | -0.227                     | 686.0113  |
| 53   | 43     | 11     | 52    | 42      | 11      | E    | 0           | 810772.797   | 0.084                      | 686.0195  |
| 70   | 34     | 36     | 69    | 33      | 37      | A    | 0           | 810826.869   | -0.144                     | 772.1366  |
| 70   | 34     | 37     | 69    | 33      | 36      | A    | 0           | 810826.869   | -0.144                     | 772.1366  |
| 70   | 34     | 37     | 69    | 33      | 37      | E    | 0           | 810832.284   | -0.245                     | 772.1242  |
| 70   | 34     | 36     | 69    | 33      | 36      | E    | 0           | 810867.430   | 0.014                      | 772.1312  |
| 55   | 42     | 13     | 54    | 41      | 14      | A    | 0           | 811570.394   | -0.077                     | 692.2054  |
| 55   | 42     | 14     | 54    | 41      | 13      | A    | 0           | 811570.394   | -0.077                     | 692.2054  |
| 55   | 42     | 14     | 54    | 41      | 14      | E    | 0           | 811609.304   | 0.011                      | 692.2122  |
| 55   | 42     | 13     | 54    | 41      | 13      | E    | 0           | 811612.421   | 0.080                      | 692.1986  |
| 57   | 41     | 17     | 56    | 40      | 16      | A    | 0           | 812388.439   | 0.080                      | 699.6294  |
| 57   | 41     | 16     | 56    | 40      | 17      | A    | 0           | 812388.439   | 0.080                      | 699.6294  |
| 57   | 41     | 16     | 56    | 40      | 16      | E    | 0           | 812426.907   | -0.437                     | 699.6213  |
| 57   | 41     | 17     | 56    | 40      | 17      | E    | 0           | 812430.125   | 0.308                      | 699.6347  |
| 59   | 40     | 19     | 58    | 39      | 20      | A    | 0           | 813184.490   | 0.151                      | 708.2888  |
| 59   | 40     | 20     | 58    | 39      | 19      | A    | 0           | 813184.490   | 0.151                      | 708.2888  |
| 59   | 40     | 19     | 58    | 39      | 19      | E    | 0           | 813219.540   | -0.315                     | 708.2796  |
| 59   | 40     | 20     | 58    | 39      | 20      | E    | 0           | 813227.892   | 0.092                      | 708.2926  |
| 61   | 39     | 23     | 60    | 38      | 22      | A    | 0           | 813950.118   | 0.067                      | 718.1900  |
| 61   | 39     | 22     | 60    | 38      | 23      | A    | 0           | 813950.118   | 0.067                      | 718.1900  |
| 61   | 39     | 22     | 60    | 38      | 22      | E    | 0           | 813981.430   | -0.126                     | 718.1798  |
| 61   | 39     | 23     | 60    | 38      | 23      | E    | 0           | 813994.998   | 0.161                      | 718.1923  |
| 48   | 46     | 2      | 47    | 45      | 3       | A    | 0           | 814311.695   | -0.091                     | 684.3981  |
| 48   | 46     | 3      | 47    | 45      | 2       | A    | 0           | 814311.695   | -0.091                     | 684.3981  |
| 48   | 46     | 3      | 47    | 45      | 3       | E    | 0           | 814334.899   | 0.034                      | 684.4095  |
| 48   | 46     | 2      | 47    | 45      | 2       | E    | 0           | 814358.606   | -0.203                     | 684.3974  |
| 63   | 38     | 25     | 62    | 37      | 26      | A    | 0           | 814674.764   | 0.138                      | 729.3409  |
| 63   | 38     | 26     | 62    | 37      | 25      | A    | 0           | 814674.764   | 0.138                      | 729.3409  |
| 63   | 38     | 25     | 62    | 37      | 26      | E    | 0           | 814701.431   | -0.194                     | 729.3298  |
| 63   | 38     | 26     | 62    | 37      | 25      | E    | 0           | 814720.080   | 0.060                      | 729.3415  |
| 50   | 45     | 6      | 49    | 44      | 5       | A    | 0           | 815164.974   | -0.093                     | 687.3427  |
| 50   | 45     | 5      | 49    | 44      | 6       | A    | 0           | 815164.974   | -0.093                     | 687.3427  |
| 50   | 45     | 6      | 49    | 44      | 6       | E    | 0           | 815192.716   | -0.020                     | 687.3531  |
| 50   | 45     | 5      | 49    | 44      | 5       | E    | 0           | 815211.665   | -0.107                     | 687.3404  |
| 65   | 37     | 29     | 64    | 36      | 28      | A    | 0           | 815343.864   | -0.031                     | 741.7504  |
| 65   | 37     | 28     | 64    | 36      | 29      | A    | 0           | 815343.864   | -0.031                     | 741.7504  |
| 65   | 37     | 29     | 64    | 36      | 29      | E    | 0           | 815365.805   | -0.147                     | 741.7387  |
| 65   | 37     | 28     | 64    | 36      | 28      | E    | 0           | 815389.149   | -0.000                     | 741.7494  |
| 67   | 36     | 31     | 66    | 35      | 32      | A    | 0           | 815939.156   | -0.136                     | 755.4295  |
| 67   | 36     | 32     | 66    | 35      | 31      | A    | 0           | 815939.156   | -0.136                     | 755.4295  |
| 67   | 36     | 32     | 66    | 35      | 32      | E    | 0           | 815955.895   | -0.138                     | 755.4174  |
| 67   | 36     | 31     | 66    | 35      | 31      | E    | 0           | 815983.859   | 0.228                      | 755.4270  |
| 52   | 44     | 8      | 51    | 43      | 9       | A    | 0           | 816013.704   | 0.069                      | 691.5062  |
| 52   | 44     | 9      | 51    | 43      | 8       | A    | 0           | 816013.704   | 0.069                      | 691.5062  |
| 52   | 44     | 9      | 51    | 43      | 9       | E    | 0           | 816045.598   | 0.101                      | 691.5156  |
| 52   | 44     | 8      | 51    | 43      | 8       | E    | 0           | 816059.393   | 0.036                      | 691.5024  |
| 69   | 35     | 35     | 68    | 34      | 34      | A    | 0           | 816436.341   | 0.036                      | 770.3915  |
| 69   | 35     | 34     | 68    | 34      | 35      | A    | 0           | 816436.341   | 0.036                      | 770.3915  |
| 69   | 35     | 35     | 68    | 34      | 35      | E    | 0           | 816447.676   | 0.253                      | 770.3792  |
| 69   | 35     | 34     | 68    | 34      | 34      | E    | 0           | 816479.145   | 0.214                      | 770.3875  |
| 54   | 43     | 12     | 53    | 42      | 11      | A    | 0           | 816854.392   | -0.018                     | 696.8923  |
| 54   | 43     | 11     | 53    | 42      | 12      | A    | 0           | 816854.392   | -0.018                     | 696.8923  |
| 54   | 43     | 12     | 53    | 42      | 12      | E    | 0           | 816890.140   | 0.140                      | 696.9004  |
| 54   | 43     | 11     | 53    | 42      | 11      | E    | 0           | 816898.508   | 0.020                      | 696.8869  |
| 56   | 42     | 14     | 55    | 41      | 15      | A    | 0           | 817683.234   | -0.111                     | 703.5049  |
| 56   | 42     | 15     | 55    | 41      | 14      | A    | 0           | 817683.234   | -0.111                     | 703.5049  |
| 56   | 42     | 15     | 55    | 41      | 15      | E    | 0           | 817722.075   | -0.061                     | 703.5117  |
| 56   | 42     | 14     | 55    | 41      | 14      | E    | 0           | 817725.352   | 0.214                      | 703.4982  |
| 58   | 41     | 18     | 57    | 40      | 17      | A    | 0           | 818495.330   | 0.159                      | 711.3491  |
| 58   | 41     | 17     | 57    | 40      | 18      | A    | 0           | 818495.330   | 0.159                      | 711.3491  |
| 58   | 41     | 17     | 57    | 40      | 17      | E    | 0           | 818533.799   | -0.260                     | 711.3411  |
| 58   | 41     | 18     | 57    | 40      | 18      | E    | 0           | 818537.148   | 0.569                      | 711.3544  |
| 60   | 40     | 20     | 59    | 39      | 21      | A    | 0           | 819283.115   | 0.076                      | 720.4304  |
| 60   | 40     | 21     | 59    | 39      | 20      | A    | 0           | 819283.115   | 0.076                      | 720.4304  |
| 60   | 40     | 20     | 59    | 39      | 20      | E    | 0           | 819318.439   | 0.001                      | 720.4212  |
| 60   | 40     | 21     | 59    | 39      | 21      | E    | 0           | 819326.731   | 0.302                      | 720.4342  |
| 47   | 47     | 1      | 46    | 46      | 0       | A    | 0           | 819579.914   | -0.124                     | 692.0936  |
| 47   | 47     | 0      | 46    | 46      | 1       | A    | 0           | 819579.914   | -0.124                     | 692.0936  |
| 47   | 47     | 1      | 46    | 46      | 1       | E    | 0           | 819597.944   | -0.268                     | 692.1058  |
| 47   | 47     | 0      | 46    | 46      | 0       | E    | 0           | 819626.800   | 0.097                      | 692.0945  |
| 62   | 39     | 24     | 61    | 38      | 23      | A    | 0           | 820038.258   | 0.189                      | 730.7557  |
| 62   | 39     | 23     | 61    | 38      | 24      | A    | 0           | 820038.258   | 0.189                      | 730.7557  |
| 62   | 39     | 23     | 61    | 38      | 23      | E    | 0           | 820069.320   | -0.114                     | 730.7455  |
| 62   | 39     | 24     | 61    | 38      | 24      | E    | 0           | 820082.703   | -0.054                     | 730.7579  |
| 49   | 46     | 3      | 48    | 45      | 4       | A    | 0           | 820434.962   | 0.095                      | 694.2368  |
| 49   | 46     | 4      | 48    | 45      | 3       | A    | 0           | 820434.962   | 0.095                      | 694.2368  |
| 49   | 46     | 4      | 48    | 45      | 4       | E    | 0           | 820458.203   | 0.250                      | 694.2482  |
| 49   | 46     | 3      | 48    | 45      | 3       | E    | 0           | 820481.654   | -0.213                     | 694.2361  |
| 64   | 38     | 26     | 63    | 37      | 27      | A    | 0           | 820748.757   | 0.029                      | 742.3328  |
| 64   | 38     | 27     | 63    | 37      | 26      | A    | 0           | 820748.757   | 0.029                      | 742.3328  |
| 64   | 38     | 26     | 63    | 37      | 27      | E    | 0           | 820775.311   | -0.255                     | 742.3218  |
| 64   | 38     | 27     | 63    | 37      | 26      | E    | 0           | 820793.835   | -0.159                     | 742.3334  |
| 51   | 45     | 7      | 50    | 44      | 6       | A    | 0           | 821286.510   | -0.116                     | 697.5968  |
| 51   | 45     | 6      | 50    | 44      | 7       | A    | 0           | 821286.510   | -0.116                     | 697.5968  |
| 51   | 45     | 7      | 50    | 44      | 7       | E    | 0           | 821314.391   | 0.095                      | 697.6073  |
| 51   | 45     | 6      | 50    | 44      | 6       | E    | 0           | 821333.214   | -0.082                     | 697.5945  |
| 66   | 37     | 29     | 65    | 36      | 29      | E    | 0           | 821445.494   | 0.412                      | 755.1704  |
| 5    | 5      | 1      | 4     | 4       | 1       | E    | 0           | 82169.701    | -0.070                     | 72.3616   |
| 68   | 36     | 32     | 67    | 35      | 33      | A    | 0           | 821972.153   | -0.031                     | 769.2827  |
| 68   | 36     | 33     | 67    | 35      | 32      | A    | 0           | 821972.153   | -0.031                     | 769.2827  |
| 68   | 36     | 32     | 67    | 35      | 32      | E    | 0           | 822016.161   | -0.151                     | 769.2802  |
| 53   | 44     | 9      | 52    | 43      | 10      | A    | 0           | 822132.852   | 0.044                      | 702.1769  |
| 53   | 44     | 10     | 52    | 43      | 9       | A    | 0           | 822132.852   | 0.044                      | 702.1769  |
| 53   | 44     | 10     | 52    | 43      | 10      | E    | 0           | 822164.738   | 0.077                      | 702.1862  |
| 53   | 44     | 9      | 52    | 43      | 9       | E    | 0           | 822178.305   | -0.174                     | 702.1730  |
| 55   | 43     | 13     | 54    | 42      | 12      | A    | 0           | 822970.140   | 0.040                      | 707.9806  |
| 55   | 43     | 12     | 54    | 42      | 13      | A    | 0           | 822970.140   | 0.040                      | 707.9806  |
| 55   | 43     | 13     | 54    | 42      | 13      | E    | 0           | 823005.711   | 0.041                      | 707.9887  |
| 55   | 43     | 12     | 54    | 42      | 12      | E    | 0           | 823014.142   | 0.028                      | 707.9753  |



| $J'$ | $K'_a$ | $K'_c$ | $J''$ | $K''_a$ | $K''_c$ | Sym. | $v_{tCH_3}$ | $\nu_{Obs.}$ | $\nu_{Obs.} - \nu_{Calc.}$ | $E_{low}$ |
|------|--------|--------|-------|---------|---------|------|-------------|--------------|----------------------------|-----------|
| 57   | 42     | 15     | 56    | 41      | 16      | A    | 0           | 823794.054   | -0.127                     | 715.0124  |
| 57   | 42     | 16     | 56    | 41      | 15      | A    | 0           | 823794.054   | -0.127                     | 715.0124  |
| 7    | 4      | 6      | 3     | 3       | 3       | A    | 0           | 82453.694    | 0.016                      | 73.3142   |
| 59   | 41     | 19     | 58    | 40      | 18      | A    | 0           | 824599.568   | 0.140                      | 723.2772  |
| 59   | 41     | 18     | 58    | 40      | 19      | A    | 0           | 824599.568   | 0.140                      | 723.2772  |
| 61   | 40     | 21     | 60    | 39      | 22      | A    | 0           | 825378.758   | 0.196                      | 732.7810  |
| 61   | 40     | 22     | 60    | 39      | 21      | A    | 0           | 825378.758   | 0.196                      | 732.7810  |
| 61   | 40     | 21     | 60    | 39      | 21      | E    | 0           | 825413.805   | -0.032                     | 732.7718  |
| 61   | 40     | 22     | 60    | 39      | 22      | E    | 0           | 825422.121   | 0.246                      | 732.7847  |
| 48   | 47     | 2      | 47    | 46      | 1       | A    | 0           | 825703.342   | -0.015                     | 701.7240  |
| 48   | 47     | 1      | 47    | 46      | 2       | A    | 0           | 825703.342   | -0.015                     | 701.7240  |
| 48   | 47     | 2      | 47    | 46      | 2       | E    | 0           | 825721.864   | 0.323                      | 701.7362  |
| 48   | 47     | 1      | 47    | 46      | 1       | E    | 0           | 825750.318   | 0.312                      | 701.7249  |
| 63   | 39     | 25     | 62    | 38      | 24      | A    | 0           | 826122.103   | -0.052                     | 743.5308  |
| 63   | 39     | 24     | 62    | 38      | 25      | A    | 0           | 826122.103   | -0.052                     | 743.5308  |
| 50   | 46     | 4      | 49    | 45      | 5       | A    | 0           | 826557.125   | -0.016                     | 704.2819  |
| 50   | 46     | 5      | 49    | 45      | 4       | A    | 0           | 826557.125   | -0.016                     | 704.2819  |
| 65   | 38     | 27     | 64    | 37      | 28      | A    | 0           | 826817.839   | -0.140                     | 755.5349  |
| 65   | 38     | 28     | 64    | 37      | 27      | A    | 0           | 826817.839   | -0.140                     | 755.5349  |
| 52   | 45     | 8      | 51    | 44      | 7       | A    | 0           | 827407.195   | 0.065                      | 708.0577  |
| 52   | 45     | 7      | 51    | 44      | 8       | A    | 0           | 827407.195   | 0.065                      | 708.0577  |
| 54   | 44     | 10     | 53    | 43      | 11      | A    | 0           | 828250.426   | -0.193                     | 713.0546  |
| 54   | 44     | 11     | 53    | 43      | 10      | A    | 0           | 828250.426   | -0.193                     | 713.0546  |
| 56   | 43     | 14     | 55    | 42      | 13      | A    | 0           | 829084.072   | 0.010                      | 719.2764  |
| 56   | 43     | 13     | 55    | 42      | 14      | A    | 0           | 829084.072   | 0.010                      | 719.2764  |
| 58   | 42     | 16     | 57    | 41      | 17      | A    | 0           | 829902.970   | 0.129                      | 726.7277  |
| 58   | 42     | 17     | 57    | 41      | 16      | A    | 0           | 829902.970   | 0.129                      | 726.7277  |
| 60   | 41     | 20     | 59    | 40      | 19      | A    | 0           | 830701.076   | 0.102                      | 735.4137  |
| 60   | 41     | 19     | 59    | 40      | 20      | A    | 0           | 830701.076   | 0.102                      | 735.4137  |
| 62   | 40     | 22     | 61    | 39      | 23      | A    | 0           | 831471.021   | 0.296                      | 745.3405  |
| 62   | 40     | 23     | 61    | 39      | 22      | A    | 0           | 831471.021   | 0.296                      | 745.3405  |
| 49   | 47     | 3      | 48    | 46      | 2       | A    | 0           | 831826.078   | 0.068                      | 711.5606  |
| 49   | 47     | 2      | 48    | 46      | 3       | A    | 0           | 831826.078   | 0.068                      | 711.5606  |
| 49   | 47     | 3      | 48    | 46      | 3       | E    | 0           | 831844.630   | 0.427                      | 711.5728  |
| 49   | 47     | 2      | 48    | 46      | 2       | E    | 0           | 831872.150   | -0.489                     | 711.5615  |
| 64   | 39     | 26     | 63    | 38      | 25      | A    | 0           | 832202.250   | 0.154                      | 756.5155  |
| 64   | 39     | 25     | 63    | 38      | 26      | A    | 0           | 832202.250   | 0.154                      | 756.5155  |
| 51   | 46     | 5      | 50    | 45      | 6       | A    | 0           | 832678.478   | -0.054                     | 714.5336  |
| 51   | 46     | 6      | 50    | 45      | 5       | A    | 0           | 832678.478   | -0.054                     | 714.5336  |
| 51   | 46     | 6      | 50    | 45      | 6       | E    | 0           | 832701.678   | 0.050                      | 714.5450  |
| 51   | 46     | 5      | 50    | 45      | 5       | E    | 0           | 832725.275   | -0.200                     | 714.5329  |
| 66   | 38     | 28     | 65    | 37      | 29      | A    | 0           | 832882.270   | 0.142                      | 768.9473  |
| 66   | 38     | 29     | 65    | 37      | 28      | A    | 0           | 832882.270   | 0.142                      | 768.9473  |
| 7    | 4      | 3      | 6     | 3       | 4       | A    | 0           | 83346.792    | 0.013                      | 73.2879   |
| 53   | 45     | 9      | 52    | 44      | 8       | A    | 0           | 83526.320    | -0.165                     | 718.7255  |
| 53   | 45     | 8      | 52    | 44      | 9       | A    | 0           | 83526.320    | -0.165                     | 718.7255  |
| 55   | 44     | 11     | 54    | 43      | 12      | A    | 0           | 834366.918   | -0.046                     | 724.1396  |
| 55   | 44     | 12     | 54    | 43      | 11      | A    | 0           | 834366.918   | -0.046                     | 724.1396  |
| 55   | 44     | 11     | 54    | 43      | 11      | E    | 0           | 834412.469   | -0.053                     | 724.1357  |
| 57   | 43     | 15     | 56    | 42      | 14      | A    | 0           | 835196.208   | 0.036                      | 730.7799  |
| 57   | 43     | 14     | 56    | 42      | 15      | A    | 0           | 835196.208   | 0.036                      | 730.7799  |
| 59   | 42     | 17     | 58    | 41      | 18      | A    | 0           | 836009.475   | 0.288                      | 738.6512  |
| 59   | 42     | 18     | 58    | 41      | 17      | A    | 0           | 836009.475   | 0.288                      | 738.6512  |
| 61   | 41     | 21     | 60    | 40      | 20      | A    | 0           | 836799.752   | 0.105                      | 747.7588  |
| 61   | 41     | 20     | 60    | 40      | 21      | A    | 0           | 836799.752   | 0.105                      | 747.7588  |
| 48   | 48     | 0      | 47    | 47      | 1       | A    | 0           | 837094.145   | 0.269                      | 719.4319  |
| 48   | 48     | 1      | 47    | 47      | 0       | A    | 0           | 837094.145   | 0.269                      | 719.4319  |
| 48   | 48     | 1      | 47    | 47      | 1       | E    | 0           | 837106.905   | -0.016                     | 719.4447  |
| 48   | 48     | 0      | 47    | 47      | 0       | E    | 0           | 837139.451   | -0.073                     | 719.4343  |
| 63   | 40     | 23     | 62    | 39      | 24      | A    | 0           | 837559.357   | 0.016                      | 758.1092  |
| 63   | 40     | 24     | 62    | 39      | 23      | A    | 0           | 837559.357   | 0.016                      | 758.1092  |
| 63   | 40     | 24     | 62    | 39      | 24      | E    | 0           | 837602.064   | -0.423                     | 758.1129  |
| 50   | 47     | 4      | 49    | 46      | 3       | A    | 0           | 837947.986   | 0.061                      | 721.6035  |
| 50   | 47     | 3      | 49    | 46      | 4       | A    | 0           | 837947.986   | 0.061                      | 721.6035  |
| 50   | 47     | 4      | 49    | 46      | 4       | E    | 0           | 837966.434   | 0.306                      | 721.6157  |
| 50   | 47     | 3      | 49    | 46      | 3       | E    | 0           | 837994.701   | 0.168                      | 721.6044  |
| 65   | 39     | 27     | 64    | 38      | 26      | A    | 0           | 838277.925   | 0.253                      | 769.7100  |
| 65   | 39     | 26     | 64    | 38      | 27      | A    | 0           | 838277.925   | 0.253                      | 769.7100  |
| 52   | 46     | 6      | 51    | 45      | 7       | A    | 0           | 838798.946   | -0.012                     | 724.9920  |
| 52   | 46     | 7      | 51    | 45      | 6       | A    | 0           | 838798.946   | -0.012                     | 724.9920  |
| 52   | 46     | 7      | 51    | 45      | 7       | E    | 0           | 838822.377   | 0.318                      | 725.0034  |
| 52   | 46     | 6      | 51    | 45      | 6       | E    | 0           | 838845.822   | -0.045                     | 724.9912  |
| 67   | 38     | 29     | 66    | 37      | 30      | A    | 0           | 838941.232   | 0.316                      | 782.5703  |
| 67   | 38     | 30     | 66    | 37      | 29      | A    | 0           | 838941.232   | 0.316                      | 782.5703  |
| 69   | 37     | 33     | 68    | 36      | 32      | A    | 0           | 839531.322   | 0.101                      | 796.7008  |
| 69   | 37     | 32     | 68    | 36      | 33      | A    | 0           | 839531.322   | 0.101                      | 796.7008  |
| 54   | 45     | 10     | 53    | 44      | 9       | A    | 0           | 839644.397   | -0.204                     | 729.6002  |
| 54   | 45     | 9      | 53    | 44      | 10      | A    | 0           | 839644.397   | -0.204                     | 729.6002  |
| 56   | 44     | 12     | 55    | 43      | 13      | A    | 0           | 840482.048   | 0.312                      | 735.4319  |
| 56   | 44     | 13     | 55    | 43      | 12      | A    | 0           | 840482.048   | 0.312                      | 735.4319  |
| 56   | 44     | 13     | 55    | 43      | 13      | E    | 0           | 840513.695   | 0.141                      | 735.4412  |
| 58   | 43     | 16     | 57    | 42      | 15      | A    | 0           | 841306.291   | -0.018                     | 742.4912  |
| 58   | 43     | 15     | 57    | 42      | 16      | A    | 0           | 841306.291   | -0.018                     | 742.4912  |
| 58   | 43     | 16     | 57    | 42      | 16      | E    | 0           | 841342.053   | 0.249                      | 742.4992  |
| 58   | 43     | 15     | 57    | 42      | 15      | E    | 0           | 841350.265   | 0.173                      | 742.4858  |
| 60   | 42     | 18     | 59    | 41      | 19      | A    | 0           | 842113.381   | 0.305                      | 750.7828  |
| 60   | 42     | 19     | 59    | 41      | 18      | A    | 0           | 842113.381   | 0.305                      | 750.7828  |
| 62   | 41     | 22     | 61    | 40      | 21      | A    | 0           | 842895.447   | 0.167                      | 760.3126  |
| 62   | 41     | 21     | 61    | 40      | 22      | A    | 0           | 842895.447   | 0.167                      | 760.3126  |
| 49   | 48     | 1      | 48    | 47      | 2       | A    | 0           | 843216.187   | 0.168                      | 729.2665  |
| 49   | 48     | 2      | 48    | 47      | 1       | A    | 0           | 843216.187   | 0.168                      | 729.2665  |
| 49   | 48     | 2      | 48    | 47      | 2       | E    | 0           | 843229.546   | 0.470                      | 729.2793  |
| 49   | 48     | 1      | 48    | 47      | 1       | E    | 0           | 843261.720   | 0.069                      | 729.2689  |
| 51   | 47     | 5      | 50    | 46      | 4       | A    | 0           | 844069.030   | -0.001                     | 731.8529  |
| 51   | 47     | 4      | 50    | 46      | 5       | A    | 0           | 844069.030   | -0.001                     | 731.8529  |
| 51   | 47     | 5      | 50    | 46      | 5       | E    | 0           | 844087.124   | -0.120                     | 731.8651  |
| 51   | 47     | 4      | 50    | 46      | 4       | E    | 0           | 844115.645   | 0.030                      | 731.8538  |
| 66   | 39     | 28     | 65    | 38      | 27      | A    | 0           | 844348.831   | 0.176                      | 783.1146  |
| 66   | 39     | 27     | 65    | 38      | 28      | A    | 0           | 844348.831   | 0.176                      | 783.1146  |
| 53   | 46     | 7      | 52    | 45      | 8       | A    | 0           | 844918.689   | 0.352                      | 735.6570  |
| 53   | 46     | 8      | 52    | 45      | 7       | A    | 0           | 844918.689   | 0.352                      | 735.6570  |
| 53   | 46     | 8      | 52    | 45      | 8       | E    | 0           | 844941.652   | 0.210                      | 735.6684  |
| 53   | 46     | 7      | 52    | 45      | 7       | E    | 0           | 844965.490   | 0.281                      | 735.6563  |
| 68   | 38     | 30     | 67    | 37      | 31      | A    | 0           | 844994.068   | -0.007                     | 796.4040  |
| 68   | 38     | 31     | 67    | 37      | 30      | A    | 0           | 844994.068   | -0.007                     | 796.4040  |
| 55   | 45     | 11     | 54    | 44      | 10      | A    | 0           | 845761.463   | 0.082                      | 740.6821  |
| 55   | 45     | 10     | 54    | 44      | 11      | A    | 0           | 845761.463   | 0.082                      | 740.6821  |
| 55   | 45     | 11     | 54    | 44      | 11      | E    | 0           | 845789.426   | 0.387                      | 740.6925  |
| 57   | 44     | 13     | 56    | 43      | 14      | A    | 0           | 846594.955   | 0.132                      | 746.9317  |
| 57   | 44     | 14     | 56    | 43      | 13      | A    | 0           | 846594.955   | 0.132                      | 746.9317  |
| 59   | 43     | 17     | 58    | 42      | 16      | A    | 0           | 847414.463   | 0.123                      | 754.4103  |
| 59   | 43     | 16     | 58    | 42      | 17      | A    | 0           | 847414.463   | 0.123                      | 754.4103  |
| 61   | 42     | 19     | 60    | 41      | 20      | A    | 0           | 848214.296   | -0.062                     | 763.1229  |
| 61   | 42     | 20     | 60    | 41      | 19      | A    | 0           | 848214.296   | -0.062                     | 763.1229  |
| 63   | 41     | 23     | 62    | 40      | 22      | A    | 0           | 848987.945   | 0.244                      | 773.0754  |
| 63   | 41     | 22     | 62    | 40      | 23      | A    | 0           | 848987.945   | 0.244                      | 773.0754  |



| $J'$ | $K'_a$ | $K'_c$ | $J''$ | $K''_a$ | $K''_c$ | Sym. | $v_{tCH_3}$ | $\nu_{Obs.}$ | $\nu_{Obs.} - \nu_{Calc.}$ | $E_{low}$ |
|------|--------|--------|-------|---------|---------|------|-------------|--------------|----------------------------|-----------|
| 50   | 48     | 2      | 49    | 47      | 3       | A    | 0           | 849337.282   | -0.203                     | 739.3073  |
| 50   | 48     | 3      | 49    | 47      | 2       | A    | 0           | 849337.282   | -0.203                     | 739.3073  |
| 50   | 48     | 3      | 49    | 47      | 3       | E    | 0           | 849350.339   | -0.217                     | 739.3201  |
| 50   | 48     | 2      | 49    | 47      | 2       | E    | 0           | 849382.750   | -0.351                     | 739.3097  |
| 65   | 40     | 25     | 64    | 39      | 26      | A    | 0           | 849725.112   | -0.036                     | 784.2748  |
| 65   | 40     | 26     | 64    | 39      | 25      | A    | 0           | 849725.112   | -0.036                     | 784.2748  |
| 52   | 47     | 6      | 51    | 46      | 5       | A    | 0           | 850189.224   | -0.031                     | 742.3088  |
| 52   | 47     | 5      | 51    | 46      | 6       | A    | 0           | 850189.224   | -0.031                     | 742.3088  |
| 52   | 47     | 6      | 51    | 46      | 6       | E    | 0           | 850207.803   | 0.326                      | 742.3210  |
| 52   | 47     | 5      | 51    | 46      | 5       | E    | 0           | 850235.958   | 0.147                      | 742.3096  |
| 67   | 39     | 29     | 66    | 38      | 28      | A    | 0           | 850414.723   | -0.090                     | 796.7293  |
| 67   | 39     | 28     | 66    | 38      | 29      | A    | 0           | 850414.723   | -0.090                     | 796.7293  |
| 54   | 46     | 8      | 53    | 45      | 9       | A    | 0           | 851036.919   | 0.336                      | 746.5289  |
| 54   | 46     | 9      | 53    | 45      | 8       | A    | 0           | 851036.919   | 0.336                      | 746.5289  |
| 69   | 38     | 31     | 68    | 37      | 32      | A    | 0           | 851041.658   | 0.326                      | 810.4487  |
| 69   | 38     | 32     | 68    | 37      | 31      | A    | 0           | 851041.658   | 0.326                      | 810.4487  |
| 54   | 46     | 9      | 53    | 45      | 9       | E    | 0           | 851059.845   | 0.154                      | 746.5403  |
| 56   | 45     | 12     | 55    | 44      | 11      | A    | 0           | 851876.703   | -0.021                     | 751.9711  |
| 56   | 45     | 11     | 55    | 44      | 12      | A    | 0           | 851876.703   | -0.021                     | 751.9711  |
| 58   | 44     | 14     | 57    | 43      | 15      | A    | 0           | 852706.203   | 0.091                      | 758.6391  |
| 58   | 44     | 15     | 57    | 43      | 14      | A    | 0           | 852706.203   | 0.091                      | 758.6391  |
| 8    | 3      | 5      | 7     | 2       | 6       | E    | 0           | 85314.828    | 0.026                      | 73.6709   |
| 8    | 3      | 5      | 7     | 2       | 6       | A    | 0           | 85321.863    | 0.036                      | 73.6593   |
| 60   | 43     | 18     | 59    | 42      | 17      | A    | 0           | 853520.426   | 0.288                      | 766.5374  |
| 60   | 43     | 17     | 59    | 42      | 18      | A    | 0           | 853520.426   | 0.288                      | 766.5374  |
| 62   | 42     | 20     | 61    | 41      | 21      | A    | 0           | 854312.919   | 0.037                      | 775.6714  |
| 62   | 42     | 21     | 61    | 41      | 20      | A    | 0           | 854312.919   | 0.037                      | 775.6714  |
| 49   | 49     | 1      | 48    | 48      | 0       | A    | 0           | 854604.956   | 0.030                      | 747.3543  |
| 49   | 49     | 0      | 48    | 48      | 1       | A    | 0           | 854604.956   | 0.030                      | 747.3543  |
| 49   | 49     | 1      | 48    | 48      | 1       | E    | 0           | 854613.176   | 0.501                      | 747.3676  |
| 49   | 49     | 0      | 48    | 48      | 0       | E    | 0           | 854649.192   | 0.243                      | 747.3583  |
| 64   | 41     | 24     | 63    | 40      | 23      | A    | 0           | 855076.850   | 0.114                      | 786.0472  |
| 64   | 41     | 23     | 63    | 40      | 24      | A    | 0           | 855076.850   | 0.114                      | 786.0472  |
| 51   | 48     | 3      | 50    | 47      | 4       | A    | 0           | 855458.128   | -0.081                     | 749.5545  |
| 51   | 48     | 4      | 50    | 47      | 3       | A    | 0           | 855458.128   | -0.081                     | 749.5545  |
| 51   | 48     | 4      | 50    | 47      | 4       | E    | 0           | 855471.262   | -0.031                     | 749.5673  |
| 51   | 48     | 3      | 50    | 47      | 3       | E    | 0           | 855503.810   | 0.004                      | 749.5569  |
| 66   | 40     | 26     | 65    | 39      | 27      | A    | 0           | 855802.108   | 0.174                      | 797.6720  |
| 66   | 40     | 27     | 65    | 39      | 26      | A    | 0           | 855802.108   | 0.174                      | 797.6720  |
| 9    | 8      | 2      | 9     | 7       | 3       | E    | 0           | 85581.919    | -0.018                     | 85.8376   |
| 9    | 8      | 1      | 9     | 7       | 2       | E    | 0           | 85613.129    | -0.036                     | 85.8475   |
| 9    | 8      | 2      | 9     | 7       | 3       | A    | 0           | 85629.079    | 0.019                      | 85.8343   |
| 53   | 47     | 7      | 52    | 46      | 6       | A    | 0           | 856308.725   | 0.205                      | 752.9713  |
| 53   | 47     | 6      | 52    | 46      | 7       | A    | 0           | 856308.725   | 0.205                      | 752.9713  |
| 53   | 47     | 7      | 52    | 46      | 7       | E    | 0           | 856327.262   | 0.513                      | 752.9835  |
| 53   | 47     | 6      | 52    | 46      | 6       | E    | 0           | 856354.905   | -0.138                     | 752.9721  |
| 68   | 39     | 30     | 67    | 38      | 29      | A    | 0           | 856475.804   | -0.101                     | 810.5544  |
| 68   | 39     | 29     | 67    | 38      | 30      | A    | 0           | 856475.804   | -0.101                     | 810.5544  |
| 8    | 8      | 0      | 8     | 7       | 1       | A    | 0           | 85705.202    | 0.083                      | 83.9836   |
| 8    | 8      | 1      | 8     | 7       | 2       | A    | 0           | 85705.202    | 0.082                      | 83.9836   |
| 70   | 38     | 32     | 69    | 37      | 33      | A    | 0           | 857082.346   | -0.053                     | 824.7045  |
| 70   | 38     | 33     | 69    | 37      | 32      | A    | 0           | 857082.346   | -0.053                     | 824.7045  |
| 70   | 38     | 32     | 69    | 37      | 33      | E    | 0           | 857107.750   | -0.313                     | 824.6937  |
| 55   | 46     | 9      | 54    | 45      | 10      | A    | 0           | 857153.856   | 0.250                      | 757.6078  |
| 55   | 46     | 10     | 54    | 45      | 9       | A    | 0           | 857153.856   | 0.250                      | 757.6078  |
| 55   | 46     | 10     | 54    | 45      | 10      | E    | 0           | 857177.185   | 0.468                      | 757.6191  |
| 55   | 46     | 9      | 54    | 45      | 9       | E    | 0           | 857200.681   | 0.291                      | 757.6070  |
| 57   | 45     | 13     | 56    | 44      | 12      | A    | 0           | 857990.721   | 0.191                      | 763.4674  |
| 57   | 45     | 12     | 56    | 44      | 13      | A    | 0           | 857990.721   | 0.191                      | 763.4674  |
| 59   | 44     | 15     | 58    | 43      | 16      | A    | 0           | 858815.639   | 0.157                      | 770.5541  |
| 59   | 44     | 16     | 58    | 43      | 15      | A    | 0           | 858815.639   | 0.157                      | 770.5541  |
| 59   | 44     | 16     | 58    | 43      | 16      | E    | 0           | 858847.331   | 0.083                      | 770.5633  |
| 59   | 44     | 15     | 58    | 43      | 15      | E    | 0           | 858860.729   | -0.024                     | 770.5503  |
| 61   | 43     | 19     | 60    | 42      | 18      | A    | 0           | 859623.608   | 0.044                      | 778.8727  |
| 61   | 43     | 18     | 60    | 42      | 19      | A    | 0           | 859623.608   | 0.044                      | 778.8727  |
| 61   | 43     | 18     | 60    | 42      | 18      | E    | 0           | 859667.287   | 0.222                      | 778.8674  |
| 63   | 42     | 21     | 62    | 41      | 22      | A    | 0           | 860408.719   | 0.230                      | 788.4286  |
| 63   | 42     | 22     | 62    | 41      | 21      | A    | 0           | 860408.719   | 0.230                      | 788.4286  |
| 50   | 49     | 2      | 49    | 48      | 1       | A    | 0           | 860725.879   | 0.013                      | 757.3931  |
| 50   | 49     | 1      | 49    | 48      | 2       | A    | 0           | 860725.879   | 0.013                      | 757.3931  |
| 50   | 49     | 2      | 49    | 48      | 2       | E    | 0           | 860733.911   | 0.281                      | 757.4064  |
| 50   | 49     | 1      | 49    | 48      | 1       | E    | 0           | 860769.934   | 0.057                      | 757.3971  |
| 65   | 41     | 25     | 64    | 40      | 24      | A    | 0           | 861162.406   | 0.207                      | 799.2282  |
| 65   | 41     | 24     | 64    | 40      | 25      | A    | 0           | 861162.406   | 0.207                      | 799.2282  |
| 52   | 48     | 4      | 51    | 47      | 5       | A    | 0           | 861578.076   | -0.045                     | 760.0080  |
| 52   | 48     | 5      | 51    | 47      | 4       | A    | 0           | 861578.076   | -0.045                     | 760.0080  |
| 52   | 48     | 5      | 51    | 47      | 5       | E    | 0           | 861591.521   | 0.304                      | 760.0208  |
| 52   | 48     | 4      | 51    | 47      | 4       | E    | 0           | 861623.761   | 0.066                      | 760.0104  |
| 67   | 40     | 27     | 66    | 39      | 28      | A    | 0           | 861874.454   | 0.093                      | 811.2790  |
| 67   | 40     | 28     | 66    | 39      | 27      | A    | 0           | 861874.454   | 0.093                      | 811.2790  |
| 54   | 47     | 8      | 53    | 46      | 7       | A    | 0           | 862426.912   | 0.168                      | 763.8405  |
| 54   | 47     | 7      | 53    | 46      | 8       | A    | 0           | 862426.912   | 0.168                      | 763.8405  |
| 54   | 47     | 8      | 53    | 46      | 8       | E    | 0           | 862445.314   | 0.331                      | 763.8526  |
| 54   | 47     | 7      | 53    | 46      | 7       | E    | 0           | 862473.189   | -0.044                     | 763.8413  |
| 69   | 39     | 31     | 68    | 38      | 30      | A    | 0           | 862531.675   | -0.007                     | 824.5900  |
| 69   | 39     | 30     | 68    | 38      | 31      | A    | 0           | 862531.675   | -0.007                     | 824.5900  |
| 56   | 46     | 10     | 55    | 45      | 11      | A    | 0           | 863269.352   | 0.036                      | 768.8936  |
| 56   | 46     | 11     | 55    | 45      | 10      | A    | 0           | 863269.352   | 0.036                      | 768.8936  |
| 56   | 46     | 11     | 55    | 45      | 11      | E    | 0           | 863292.723   | 0.296                      | 768.9050  |
| 56   | 46     | 10     | 55    | 45      | 10      | E    | 0           | 863316.363   | 0.312                      | 768.8929  |
| 58   | 45     | 14     | 57    | 44      | 13      | A    | 0           | 864102.703   | 0.011                      | 775.1711  |
| 58   | 45     | 13     | 57    | 44      | 14      | A    | 0           | 864102.703   | 0.011                      | 775.1711  |
| 60   | 44     | 16     | 59    | 43      | 17      | A    | 0           | 864922.738   | -0.077                     | 782.6770  |
| 60   | 44     | 17     | 59    | 43      | 16      | A    | 0           | 864922.738   | -0.077                     | 782.6770  |
| 62   | 43     | 20     | 61    | 42      | 19      | A    | 0           | 865724.469   | -0.011                     | 791.4163  |
| 62   | 43     | 19     | 61    | 42      | 20      | A    | 0           | 865724.469   | -0.011                     | 791.4163  |
| 62   | 43     | 20     | 61    | 42      | 20      | E    | 0           | 865760.028   | 0.187                      | 791.4242  |
| 62   | 43     | 19     | 61    | 42      | 19      | E    | 0           | 865767.961   | 0.087                      | 791.4109  |
| 64   | 42     | 22     | 63    | 41      | 23      | A    | 0           | 866501.226   | 0.206                      | 801.3946  |
| 64   | 42     | 23     | 63    | 41      | 22      | A    | 0           | 866501.226   | 0.206                      | 801.3946  |
| 51   | 49     | 3      | 50    | 48      | 2       | A    | 0           | 866845.953   | -0.169                     | 767.6382  |
| 51   | 49     | 2      | 50    | 48      | 3       | A    | 0           | 866845.953   | -0.169                     | 767.6382  |
| 51   | 49     | 3      | 50    | 48      | 3       | E    | 0           | 866853.805   | -0.096                     | 767.6514  |
| 51   | 49     | 2      | 50    | 48      | 2       | E    | 0           | 866890.173   | 0.054                      | 767.6421  |
| 66   | 41     | 26     | 65    | 40      | 25      | A    | 0           | 867243.831   | -0.076                     | 812.6186  |
| 66   | 41     | 25     | 65    | 40      | 26      | A    | 0           | 867243.831   | -0.076                     | 812.6186  |
| 66   | 41     | 25     | 65    | 40      | 25      | E    | 0           | 867281.663   | -0.105                     | 812.6106  |
| 66   | 41     | 26     | 65    | 40      | 26      | E    | 0           | 867285.036   | 0.268                      | 812.6236  |
| 53   | 48     | 5      | 52    | 47      | 6       | A    | 0           | 867696.885   | -0.266                     | 770.6681  |
| 53   | 48     | 6      | 52    | 47      | 5       | A    | 0           | 867696.885   | -0.266                     | 770.6681  |
| 53   | 48     | 6      | 52    | 47      | 6       | E    | 0           | 867710.646   | 0.387                      | 770.6808  |
| 53   | 48     | 5      | 52    | 47      | 5       | E    | 0           | 867742.800   | 0.101                      | 770.6705  |
| 68   | 40     | 28     | 67    | 39      | 29      | A    | 0           | 867942.325   | 0.113                      | 825.0961  |
| 68   | 40     | 29     | 67    | 39      | 28      | A    | 0           | 867942.325   | 0.113                      | 825.0961  |
| 55   | 47     | 9      | 54    | 46      | 8       | A    | 0           | 868544.076   | 0.229                      | 774.9165  |
| 55   | 47     | 8      | 54    | 46      | 9       | A    | 0           | 868544.076   | 0.229                      | 774.9165  |



| $J'$ | $K'_a$ | $K'_c$ | $J''$ | $K''_a$ | $K''_c$ | Sym. | $v_{tCH_3}$ | $\nu_{Obs.}$ | $\nu_{Obs.} - \nu_{Calc.}$ | $E_{low}$ |
|------|--------|--------|-------|---------|---------|------|-------------|--------------|----------------------------|-----------|
| 70   | 39     | 32     | 69    | 38      | 31      | A    | 0           | 868581.798   | -0.091                     | 838.8364  |
| 70   | 39     | 31     | 69    | 38      | 32      | A    | 0           | 868581.798   | -0.091                     | 838.8364  |
| 55   | 47     | 8      | 54    | 46      | 8       | E    | 0           | 868590.260   | -0.037                     | 774.9173  |
| 57   | 46     | 11     | 56    | 45      | 12      | A    | 0           | 869383.492   | -0.125                     | 780.3866  |
| 57   | 46     | 12     | 56    | 45      | 11      | A    | 0           | 869383.492   | -0.125                     | 780.3866  |
| 57   | 46     | 12     | 56    | 45      | 12      | E    | 0           | 869406.908   | 0.180                      | 780.3979  |
| 59   | 45     | 15     | 58    | 44      | 14      | A    | 0           | 870213.227   | 0.125                      | 787.0823  |
| 59   | 45     | 14     | 58    | 44      | 15      | A    | 0           | 870213.227   | 0.125                      | 787.0823  |
| 59   | 45     | 14     | 58    | 44      | 14      | E    | 0           | 870259.139   | -0.191                     | 787.0799  |
| 61   | 44     | 17     | 60    | 43      | 18      | A    | 0           | 871027.992   | 0.007                      | 795.0078  |
| 61   | 44     | 18     | 60    | 43      | 17      | A    | 0           | 871027.992   | 0.007                      | 795.0078  |
| 63   | 43     | 21     | 62    | 42      | 20      | A    | 0           | 871822.799   | 0.058                      | 804.1682  |
| 63   | 43     | 20     | 62    | 42      | 21      | A    | 0           | 871822.799   | 0.058                      | 804.1682  |
| 50   | 50     | 0      | 49    | 49      | 0       | E    | 0           | 872155.100   | 0.192                      | 775.8663  |
| 65   | 42     | 23     | 64    | 41      | 24      | A    | 0           | 872590.485   | 0.177                      | 814.5695  |
| 65   | 42     | 24     | 64    | 41      | 23      | A    | 0           | 872590.485   | 0.177                      | 814.5695  |
| 52   | 49     | 4      | 51    | 48      | 3       | A    | 0           | 872965.581   | -0.047                     | 778.0895  |
| 52   | 49     | 3      | 51    | 48      | 4       | A    | 0           | 872965.581   | -0.047                     | 778.0895  |
| 67   | 41     | 27     | 66    | 40      | 26      | A    | 0           | 873321.444   | -0.221                     | 826.2185  |
| 67   | 41     | 26     | 66    | 40      | 27      | A    | 0           | 873321.444   | -0.221                     | 826.2185  |
| 54   | 48     | 6      | 53    | 47      | 7       | A    | 0           | 873815.072   | -0.152                     | 781.5347  |
| 54   | 48     | 7      | 53    | 47      | 6       | A    | 0           | 873815.072   | -0.152                     | 781.5347  |
| 56   | 47     | 10     | 55    | 46      | 9       | A    | 0           | 874659.520   | -0.224                     | 786.1993  |
| 56   | 47     | 9      | 55    | 46      | 10      | A    | 0           | 874659.520   | -0.224                     | 786.1993  |
| 58   | 46     | 12     | 57    | 45      | 13      | A    | 0           | 875496.665   | 0.253                      | 792.0869  |
| 58   | 46     | 13     | 57    | 45      | 12      | A    | 0           | 875496.665   | 0.253                      | 792.0869  |
| 60   | 45     | 16     | 59    | 44      | 15      | A    | 0           | 876321.503   | -0.144                     | 799.2011  |
| 60   | 45     | 15     | 59    | 44      | 16      | A    | 0           | 876321.503   | -0.144                     | 799.2011  |
| 62   | 44     | 18     | 61    | 43      | 19      | A    | 0           | 877131.089   | 0.226                      | 807.5467  |
| 62   | 44     | 19     | 61    | 43      | 18      | A    | 0           | 877131.089   | 0.226                      | 807.5467  |
| 8    | 4      | 5      | 7     | 3       | 4       | E    | 0           | 87717.071    | -0.020                     | 74.8051   |
| 8    | 4      | 5      | 7     | 3       | 4       | A    | 0           | 87760.823    | 0.015                      | 74.7937   |
| 64   | 43     | 22     | 63    | 42      | 21      | A    | 0           | 877918.391   | 0.192                      | 817.1287  |
| 64   | 43     | 21     | 63    | 42      | 22      | A    | 0           | 877918.391   | 0.192                      | 817.1287  |
| 51   | 50     | 1      | 50    | 49      | 2       | A    | 0           | 878232.540   | -0.267                     | 786.1039  |
| 51   | 50     | 2      | 50    | 49      | 1       | A    | 0           | 878232.540   | -0.267                     | 786.1039  |
| 66   | 42     | 24     | 65    | 41      | 25      | A    | 0           | 878676.343   | 0.160                      | 827.9535  |
| 66   | 42     | 25     | 65    | 41      | 24      | A    | 0           | 878676.343   | 0.160                      | 827.9535  |
| 53   | 49     | 5      | 52    | 48      | 4       | A    | 0           | 879084.478   | 0.159                      | 788.7472  |
| 53   | 49     | 4      | 52    | 48      | 5       | A    | 0           | 879084.478   | 0.159                      | 788.7472  |
| 68   | 41     | 28     | 67    | 40      | 27      | A    | 0           | 879395.396   | 0.119                      | 840.0280  |
| 68   | 41     | 27     | 67    | 40      | 28      | A    | 0           | 879395.396   | 0.119                      | 840.0280  |
| 55   | 48     | 7      | 54    | 47      | 8       | A    | 0           | 879932.222   | -0.042                     | 792.6080  |
| 55   | 48     | 8      | 54    | 47      | 7       | A    | 0           | 879932.222   | -0.042                     | 792.6080  |
| 55   | 48     | 8      | 54    | 47      | 8       | E    | 0           | 879945.681   | 0.282                      | 792.6207  |
| 55   | 48     | 7      | 54    | 47      | 7       | E    | 0           | 879977.906   | 0.155                      | 792.6103  |
| 70   | 40     | 30     | 69    | 39      | 31      | A    | 0           | 880063.433   | 0.150                      | 853.3610  |
| 70   | 40     | 31     | 69    | 39      | 30      | A    | 0           | 880063.433   | 0.150                      | 853.3610  |
| 57   | 47     | 11     | 56    | 46      | 10      | A    | 0           | 880774.447   | 0.100                      | 797.6892  |
| 57   | 47     | 10     | 56    | 46      | 11      | A    | 0           | 880774.447   | 0.100                      | 797.6892  |
| 59   | 46     | 13     | 58    | 45      | 14      | A    | 0           | 881607.570   | -0.030                     | 803.9944  |
| 59   | 46     | 14     | 58    | 45      | 13      | A    | 0           | 881607.570   | -0.030                     | 803.9944  |
| 61   | 45     | 17     | 60    | 44      | 16      | A    | 0           | 882428.367   | 0.153                      | 811.5277  |
| 61   | 45     | 16     | 60    | 44      | 17      | A    | 0           | 882428.367   | 0.153                      | 811.5277  |
| 6    | 5      | 2      | 5     | 4       | 2       | E    | 0           | 88313.056    | -0.005                     | 73.3897   |
| 63   | 44     | 19     | 62    | 43      | 20      | A    | 0           | 883231.401   | 0.083                      | 820.2937  |
| 63   | 44     | 20     | 62    | 43      | 19      | A    | 0           | 883231.401   | 0.083                      | 820.2937  |
| 63   | 44     | 20     | 62    | 43      | 20      | E    | 0           | 883263.229   | 0.245                      | 820.3028  |
| 63   | 44     | 19     | 62    | 43      | 19      | E    | 0           | 883276.121   | -0.086                     | 820.2898  |
| 6    | 5      | 1      | 5     | 4       | 1       | E    | 0           | 88354.393    | 0.021                      | 73.3959   |
| 65   | 43     | 23     | 64    | 42      | 22      | A    | 0           | 884010.833   | 0.129                      | 830.2979  |
| 65   | 43     | 22     | 64    | 42      | 23      | A    | 0           | 884010.833   | 0.129                      | 830.2979  |
| 54   | 49     | 6      | 53    | 48      | 5       | A    | 0           | 885201.915   | -0.213                     | 799.6113  |
| 54   | 49     | 5      | 53    | 48      | 6       | A    | 0           | 885201.915   | -0.213                     | 799.6113  |
| 54   | 49     | 5      | 53    | 48      | 5       | E    | 0           | 885246.091   | 0.027                      | 799.6152  |
| 69   | 41     | 29     | 68    | 40      | 28      | A    | 0           | 885464.564   | 0.026                      | 854.0475  |
| 69   | 41     | 28     | 68    | 40      | 29      | A    | 0           | 885464.564   | 0.026                      | 854.0475  |
| 56   | 48     | 8      | 55    | 47      | 9       | A    | 0           | 886048.131   | -0.062                     | 803.8880  |
| 56   | 48     | 9      | 55    | 47      | 8       | A    | 0           | 886048.131   | -0.062                     | 803.8880  |
| 56   | 48     | 8      | 55    | 47      | 8       | E    | 0           | 886093.611   | -0.033                     | 803.8903  |
| 58   | 47     | 12     | 57    | 46      | 11      | A    | 0           | 886887.346   | -0.219                     | 809.3861  |
| 58   | 47     | 11     | 57    | 46      | 12      | A    | 0           | 886887.346   | -0.219                     | 809.3861  |
| 58   | 47     | 12     | 57    | 46      | 12      | E    | 0           | 886905.772   | -0.060                     | 809.3982  |
| 58   | 47     | 11     | 57    | 46      | 11      | E    | 0           | 886934.103   | 0.229                      | 809.3869  |
| 60   | 46     | 14     | 59    | 45      | 15      | A    | 0           | 887717.054   | -0.025                     | 816.1095  |
| 60   | 46     | 15     | 59    | 45      | 14      | A    | 0           | 887717.054   | -0.025                     | 816.1095  |
| 60   | 46     | 15     | 59    | 45      | 15      | E    | 0           | 887740.677   | 0.491                      | 816.1207  |
| 62   | 45     | 18     | 61    | 44      | 17      | A    | 0           | 888532.818   | 0.136                      | 824.0622  |
| 62   | 45     | 17     | 61    | 44      | 18      | A    | 0           | 888532.818   | 0.136                      | 824.0622  |
| 64   | 44     | 20     | 63    | 43      | 21      | A    | 0           | 889329.450   | 0.238                      | 833.2491  |
| 64   | 44     | 21     | 63    | 43      | 20      | A    | 0           | 889329.450   | 0.238                      | 833.2491  |
| 64   | 44     | 21     | 63    | 43      | 21      | E    | 0           | 889361.217   | 0.368                      | 833.2582  |
| 64   | 44     | 20     | 63    | 43      | 20      | E    | 0           | 889374.105   | 0.115                      | 833.2452  |
| 51   | 51     | 1      | 50    | 50      | 0       | A    | 0           | 889618.252   | -0.029                     | 804.9514  |
| 51   | 51     | 0      | 50    | 50      | 1       | A    | 0           | 889618.252   | -0.029                     | 804.9514  |
| 51   | 51     | 0      | 50    | 50      | 0       | E    | 0           | 889657.084   | -0.249                     | 804.9583  |
| 66   | 43     | 24     | 65    | 42      | 23      | A    | 0           | 890100.528   | 0.431                      | 843.6759  |
| 66   | 43     | 23     | 65    | 42      | 24      | A    | 0           | 890100.528   | 0.431                      | 843.6759  |
| 55   | 49     | 7      | 54    | 48      | 6       | A    | 0           | 891319.067   | 0.086                      | 810.6820  |
| 55   | 49     | 6      | 54    | 48      | 7       | A    | 0           | 891319.067   | 0.086                      | 810.6820  |
| 55   | 49     | 7      | 54    | 48      | 7       | E    | 0           | 891327.023   | 0.198                      | 810.6952  |
| 55   | 49     | 6      | 54    | 48      | 6       | E    | 0           | 891363.127   | 0.236                      | 810.6859  |
| 57   | 48     | 10     | 56    | 47      | 10      | E    | 0           | 892176.336   | 0.246                      | 815.3876  |
| 59   | 47     | 13     | 58    | 46      | 12      | A    | 0           | 892999.356   | 0.049                      | 821.2903  |
| 59   | 47     | 12     | 58    | 46      | 13      | A    | 0           | 892999.356   | 0.049                      | 821.2903  |
| 59   | 47     | 13     | 58    | 46      | 13      | E    | 0           | 893017.991   | 0.411                      | 821.3023  |
| 59   | 47     | 12     | 58    | 46      | 12      | E    | 0           | 893045.770   | 0.211                      | 821.2910  |
| 61   | 46     | 15     | 60    | 45      | 16      | A    | 0           | 893824.827   | 0.085                      | 828.4321  |
| 61   | 46     | 16     | 60    | 45      | 15      | A    | 0           | 893824.827   | 0.085                      | 828.4321  |
| 61   | 46     | 15     | 60    | 45      | 15      | E    | 0           | 893871.484   | 0.328                      | 828.4312  |
| 63   | 45     | 19     | 62    | 44      | 18      | A    | 0           | 894634.856   | -0.077                     | 836.8046  |
| 63   | 45     | 18     | 62    | 44      | 19      | A    | 0           | 894634.856   | -0.077                     | 836.8046  |
| 65   | 44     | 21     | 64    | 43      | 22      | A    | 0           | 895424.280   | -0.127                     | 846.4129  |
| 65   | 44     | 22     | 64    | 43      | 21      | A    | 0           | 895424.280   | -0.127                     | 846.4129  |
| 52   | 51     | 2      | 51    | 50      | 1       | A    | 0           | 895736.645   | -0.097                     | 815.3986  |
| 52   | 51     | 1      | 51    | 50      | 2       | A    | 0           | 895736.645   | -0.097                     | 815.3986  |
| 52   | 51     | 1      | 51    | 50      | 1       | E    | 0           | 895775.484   | -0.302                     | 815.4054  |
| 67   | 43     | 25     | 66    | 42      | 24      | A    | 0           | 896186.289   | 0.069                      | 857.2629  |
| 67   | 43     | 24     | 66    | 42      | 25      | A    | 0           | 896186.289   | 0.069                      | 857.2629  |
| 54   | 50     | 4      | 53    | 49      | 5       | A    | 0           | 896587.414   | -0.119                     | 818.0703  |
| 54   | 50     | 5      | 53    | 49      | 4       | A    | 0           | 896587.414   | -0.119                     | 818.0703  |
| 54   | 50     | 4      | 53    | 49      | 4       | E    | 0           | 896629.713   | 0.419                      | 818.0757  |
| 69   | 42     | 27     | 68    | 41      | 28      | A    | 0           | 896911.587   | 0.038                      | 869.3615  |
| 69   | 42     | 28     | 68    | 41      | 27      | A    | 0           | 896911.587   | 0.038                      | 869.3615  |
| 56   | 49     | 8      | 55    | 48      | 7       | A    | 0           | 897434.664   | -0.143                     | 821.9593  |
| 56   | 49     | 7      | 55    | 48      | 8       | A    | 0           | 897434.664   | -0.143                     | 821.9593  |



| $J'$ | $K'_a$ | $K'_c$ | $J''$ | $K''_a$ | $K''_c$ | Sym. | $v_{tCH_3}$ | $\nu_{Obs.}$ | $\nu_{Obs.} - \nu_{Calc.}$ | $E_{low}$ |
|------|--------|--------|-------|---------|---------|------|-------------|--------------|----------------------------|-----------|
| 56   | 49     | 8      | 55    | 48      | 8       | E    | 0           | 897442.798   | 0.129                      | 821.9725  |
| 56   | 49     | 7      | 55    | 48      | 7       | E    | 0           | 897478.842   | 0.154                      | 821.9632  |
| 58   | 48     | 10     | 57    | 47      | 11      | A    | 0           | 898276.111   | -0.278                     | 827.0687  |
| 58   | 48     | 11     | 57    | 47      | 10      | A    | 0           | 898276.111   | -0.278                     | 827.0687  |
| 60   | 47     | 14     | 59    | 46      | 13      | A    | 0           | 899109.748   | 0.273                      | 833.4017  |
| 60   | 47     | 13     | 59    | 46      | 14      | A    | 0           | 899109.748   | 0.273                      | 833.4017  |
| 8    | 4      | 4      | 7     | 3       | 5       | A    | 0           | 89932.724    | 0.025                      | 74.7316   |
| 62   | 46     | 16     | 61    | 45      | 17      | A    | 0           | 899930.261   | -0.218                     | 840.9623  |
| 62   | 46     | 17     | 61    | 45      | 16      | A    | 0           | 899930.261   | -0.218                     | 840.9623  |
| 64   | 45     | 20     | 63    | 44      | 19      | A    | 0           | 900735.173   | 0.336                      | 849.7551  |
| 64   | 45     | 19     | 63    | 44      | 20      | A    | 0           | 900735.173   | 0.336                      | 849.7551  |
| 66   | 44     | 22     | 65    | 43      | 23      | A    | 0           | 901516.634   | -0.126                     | 859.7853  |
| 66   | 44     | 23     | 65    | 43      | 22      | A    | 0           | 901516.634   | -0.126                     | 859.7853  |
| 53   | 51     | 3      | 52    | 50      | 3       | E    | 0           | 901851.308   | -0.165                     | 826.0654  |
| 53   | 51     | 3      | 52    | 50      | 2       | A    | 0           | 901854.618   | 0.119                      | 826.0518  |
| 53   | 51     | 2      | 52    | 50      | 3       | A    | 0           | 901854.618   | 0.119                      | 826.0518  |
| 68   | 43     | 26     | 67    | 42      | 25      | A    | 0           | 902269.098   | 0.191                      | 871.0591  |
| 68   | 43     | 25     | 67    | 42      | 26      | A    | 0           | 902269.098   | 0.191                      | 871.0591  |
| 55   | 50     | 5      | 54    | 49      | 6       | A    | 0           | 902703.908   | -0.184                     | 829.1385  |
| 55   | 50     | 6      | 54    | 49      | 5       | A    | 0           | 902703.908   | -0.184                     | 829.1385  |
| 57   | 49     | 9      | 56    | 48      | 8       | A    | 0           | 903549.658   | 0.127                      | 833.4434  |
| 57   | 49     | 8      | 56    | 48      | 9       | A    | 0           | 903549.658   | 0.127                      | 833.4434  |
| 57   | 49     | 8      | 56    | 48      | 8       | E    | 0           | 903593.563   | 0.184                      | 833.4472  |
| 59   | 48     | 11     | 58    | 47      | 12      | A    | 0           | 904388.551   | 0.064                      | 838.9695  |
| 59   | 48     | 12     | 58    | 47      | 11      | A    | 0           | 904388.551   | 0.064                      | 838.9695  |
| 61   | 47     | 15     | 60    | 46      | 14      | A    | 0           | 905218.214   | 0.241                      | 845.7205  |
| 61   | 47     | 14     | 60    | 46      | 15      | A    | 0           | 905218.214   | 0.241                      | 845.7205  |
| 63   | 46     | 17     | 62    | 45      | 18      | A    | 0           | 906034.153   | -0.025                     | 853.7004  |
| 63   | 46     | 18     | 62    | 45      | 17      | A    | 0           | 906034.153   | -0.025                     | 853.7004  |
| 65   | 45     | 21     | 64    | 44      | 20      | A    | 0           | 906832.279   | 0.010                      | 862.9139  |
| 65   | 45     | 20     | 64    | 44      | 21      | A    | 0           | 906832.279   | 0.010                      | 862.9139  |
| 52   | 52     | 0      | 51    | 51      | 1       | A    | 0           | 907120.458   | 0.068                      | 834.6259  |
| 52   | 52     | 1      | 51    | 51      | 0       | A    | 0           | 907120.458   | 0.068                      | 834.6259  |
| 67   | 44     | 23     | 66    | 43      | 24      | A    | 0           | 907606.090   | -0.033                     | 873.3665  |
| 67   | 44     | 24     | 66    | 43      | 23      | A    | 0           | 907606.090   | -0.033                     | 873.3665  |
| 67   | 44     | 23     | 66    | 43      | 23      | E    | 0           | 907650.667   | 0.142                      | 873.3626  |
| 54   | 51     | 4      | 53    | 50      | 4       | E    | 0           | 907968.289   | -0.200                     | 836.9249  |
| 54   | 51     | 4      | 53    | 50      | 3       | A    | 0           | 907971.465   | -0.028                     | 836.9114  |
| 54   | 51     | 3      | 53    | 50      | 4       | A    | 0           | 907971.465   | -0.028                     | 836.9114  |
| 54   | 51     | 3      | 53    | 50      | 3       | E    | 0           | 908010.555   | 0.039                      | 836.9182  |
| 69   | 43     | 27     | 68    | 42      | 26      | A    | 0           | 908348.042   | 0.053                      | 885.0644  |
| 69   | 43     | 26     | 68    | 42      | 27      | A    | 0           | 908348.042   | 0.053                      | 885.0644  |
| 56   | 50     | 6      | 55    | 49      | 7       | A    | 0           | 908819.511   | -0.187                     | 840.4132  |
| 56   | 50     | 7      | 55    | 49      | 6       | A    | 0           | 908819.511   | -0.187                     | 840.4132  |
| 56   | 50     | 6      | 55    | 49      | 6       | E    | 0           | 908861.511   | 0.096                      | 840.4186  |
| 58   | 49     | 10     | 57    | 48      | 9       | A    | 0           | 909662.876   | -0.197                     | 845.1342  |
| 58   | 49     | 9      | 57    | 48      | 10      | A    | 0           | 909662.876   | -0.197                     | 845.1342  |
| 58   | 49     | 9      | 57    | 48      | 9       | E    | 0           | 909707.154   | 0.269                      | 845.1381  |
| 60   | 48     | 12     | 59    | 47      | 13      | A    | 0           | 910498.902   | -0.231                     | 851.0775  |
| 60   | 48     | 13     | 59    | 47      | 12      | A    | 0           | 910498.902   | -0.231                     | 851.0775  |
| 62   | 47     | 16     | 61    | 46      | 15      | A    | 0           | 911324.901   | 0.204                      | 858.2469  |
| 62   | 47     | 15     | 61    | 46      | 16      | A    | 0           | 911324.901   | 0.204                      | 858.2469  |
| 64   | 46     | 18     | 63    | 45      | 19      | A    | 0           | 912135.866   | 0.142                      | 866.6464  |
| 64   | 46     | 19     | 63    | 45      | 18      | A    | 0           | 912135.866   | 0.142                      | 866.6464  |
| 66   | 45     | 22     | 65    | 44      | 21      | A    | 0           | 912926.714   | -0.383                     | 876.2811  |
| 66   | 45     | 21     | 65    | 44      | 22      | A    | 0           | 912926.714   | -0.383                     | 876.2811  |
| 53   | 52     | 1      | 52    | 51      | 2       | A    | 0           | 913237.597   | 0.024                      | 845.2771  |
| 53   | 52     | 2      | 52    | 51      | 1       | A    | 0           | 913237.597   | 0.024                      | 845.2771  |
| 55   | 51     | 5      | 54    | 50      | 4       | A    | 0           | 914087.770   | 0.107                      | 847.9772  |
| 55   | 51     | 4      | 54    | 50      | 5       | A    | 0           | 914087.770   | 0.107                      | 847.9772  |
| 70   | 43     | 28     | 69    | 42      | 27      | A    | 0           | 914423.201   | -0.089                     | 899.2793  |
| 70   | 43     | 27     | 69    | 42      | 28      | A    | 0           | 914423.201   | -0.089                     | 899.2793  |
| 59   | 49     | 11     | 58    | 48      | 11      | E    | 0           | 915783.277   | 0.004                      | 857.0451  |
| 61   | 48     | 13     | 60    | 47      | 14      | A    | 0           | 916608.634   | 0.397                      | 863.3928  |
| 61   | 48     | 14     | 60    | 47      | 13      | A    | 0           | 916608.634   | 0.397                      | 863.3928  |
| 63   | 47     | 17     | 62    | 46      | 16      | A    | 0           | 917429.487   | -0.059                     | 870.9808  |
| 63   | 47     | 16     | 62    | 46      | 17      | A    | 0           | 917429.487   | -0.059                     | 870.9808  |
| 65   | 46     | 19     | 64    | 45      | 20      | A    | 0           | 918235.091   | 0.093                      | 879.8004  |
| 65   | 46     | 20     | 64    | 45      | 19      | A    | 0           | 918235.091   | 0.093                      | 879.8004  |
| 67   | 45     | 23     | 66    | 44      | 22      | A    | 0           | 919019.383   | 0.200                      | 889.8567  |
| 67   | 45     | 22     | 66    | 44      | 23      | A    | 0           | 919019.383   | 0.200                      | 889.8567  |
| 54   | 52     | 2      | 53    | 51      | 3       | A    | 0           | 919353.868   | -0.174                     | 856.1345  |
| 54   | 52     | 3      | 53    | 51      | 2       | A    | 0           | 919353.868   | -0.174                     | 856.1345  |
| 56   | 51     | 6      | 55    | 50      | 5       | A    | 0           | 920203.207   | 0.260                      | 859.2495  |
| 56   | 51     | 5      | 55    | 50      | 6       | A    | 0           | 920203.207   | 0.260                      | 859.2495  |
| 58   | 50     | 8      | 57    | 49      | 9       | A    | 0           | 921047.384   | -0.384                     | 863.5825  |
| 58   | 50     | 9      | 57    | 49      | 8       | A    | 0           | 921047.384   | -0.384                     | 863.5825  |
| 60   | 49     | 12     | 59    | 48      | 11      | A    | 0           | 921886.172   | -0.123                     | 869.1367  |
| 60   | 49     | 11     | 59    | 48      | 12      | A    | 0           | 921886.172   | -0.123                     | 869.1367  |
| 64   | 47     | 18     | 63    | 46      | 17      | A    | 0           | 923532.534   | 0.124                      | 883.9225  |
| 64   | 47     | 17     | 63    | 46      | 18      | A    | 0           | 923532.534   | 0.124                      | 883.9225  |
| 64   | 47     | 17     | 63    | 46      | 17      | E    | 0           | 923578.472   | 0.160                      | 883.9232  |
| 9    | 4      | 6      | 8     | 3       | 5       | E    | 0           | 92405.202    | -0.016                     | 76.5167   |
| 66   | 46     | 20     | 65    | 45      | 21      | A    | 0           | 924332.153   | 0.275                      | 893.1626  |
| 66   | 46     | 21     | 65    | 45      | 20      | A    | 0           | 924332.153   | 0.275                      | 893.1626  |
| 9    | 4      | 6      | 8     | 3       | 5       | A    | 0           | 92434.196    | -0.009                     | 76.5054   |
| 53   | 53     | 1      | 52    | 52      | 1       | E    | 0           | 924605.688   | 0.066                      | 864.8974  |
| 53   | 53     | 0      | 52    | 52      | 0       | E    | 0           | 924651.267   | -0.068                     | 864.8935  |
| 68   | 45     | 24     | 67    | 44      | 23      | A    | 0           | 925108.484   | 0.094                      | 903.6410  |
| 68   | 45     | 23     | 67    | 44      | 24      | A    | 0           | 925108.484   | 0.094                      | 903.6410  |
| 55   | 52     | 3      | 54    | 51      | 4       | A    | 0           | 925469.525   | -0.217                     | 867.1980  |
| 55   | 52     | 4      | 54    | 51      | 3       | A    | 0           | 925469.525   | -0.217                     | 867.1980  |
| 70   | 44     | 26     | 69    | 43      | 27      | A    | 0           | 925854.876   | 0.138                      | 915.3637  |
| 70   | 44     | 27     | 69    | 43      | 26      | A    | 0           | 925854.876   | 0.138                      | 915.3637  |
| 57   | 51     | 7      | 56    | 50      | 6       | A    | 0           | 926317.242   | -0.034                     | 870.7282  |
| 57   | 51     | 6      | 56    | 50      | 7       | A    | 0           | 926317.242   | -0.034                     | 870.7282  |
| 57   | 51     | 6      | 56    | 50      | 6       | E    | 0           | 926356.379   | 0.130                      | 870.7349  |
| 59   | 50     | 9      | 58    | 49      | 10      | A    | 0           | 927159.935   | -0.150                     | 875.4773  |
| 59   | 50     | 10     | 58    | 49      | 9       | A    | 0           | 927159.935   | -0.150                     | 875.4773  |
| 61   | 49     | 13     | 60    | 48      | 12      | A    | 0           | 927995.763   | -0.043                     | 881.4485  |
| 61   | 49     | 12     | 60    | 48      | 13      | A    | 0           | 927995.763   | -0.043                     | 881.4485  |
| 63   | 48     | 15     | 62    | 47      | 16      | A    | 0           | 928821.027   | -0.413                     | 888.6454  |
| 63   | 48     | 16     | 62    | 47      | 15      | A    | 0           | 928821.027   | -0.413                     | 888.6454  |
| 65   | 47     | 19     | 64    | 46      | 18      | A    | 0           | 929633.098   | -0.085                     | 897.0720  |
| 65   | 47     | 18     | 64    | 46      | 19      | A    | 0           | 929633.098   | -0.085                     | 897.0720  |
| 67   | 46     | 21     | 66    | 45      | 22      | A    | 0           | 930426.039   | -0.201                     | 906.7330  |
| 67   | 46     | 22     | 66    | 45      | 21      | A    | 0           | 930426.039   | -0.201                     | 906.7330  |
| 69   | 45     | 25     | 68    | 44      | 24      | A    | 0           | 931194.488   | -0.086                     | 917.6340  |
| 69   | 45     | 24     | 68    | 44      | 25      | A    | 0           | 931194.488   | -0.086                     | 917.6340  |
| 56   | 52     | 4      | 55    | 51      | 5       | A    | 0           | 931584.650   | 0.037                      | 878.4679  |
| 56   | 52     | 5      | 55    | 51      | 4       | A    | 0           | 931584.650   | 0.037                      | 878.4679  |
| 58   | 51     | 8      | 57    | 50      | 8       | E    | 0           | 932427.290   | -0.391                     | 882.4270  |
| 58   | 51     | 8      | 57    | 50      | 7       | A    | 0           | 932430.513   | -0.074                     | 882.4135  |
| 58   | 51     | 7      | 57    | 50      | 8       | A    | 0           | 932430.513   | -0.074                     | 882.4135  |
| 60   | 50     | 10     | 59    | 49      | 11      | A    | 0           | 933270.953   | -0.202                     | 887.5789  |
| 60   | 50     | 11     | 59    | 49      | 10      | A    | 0           | 933270.953   | -0.202                     | 887.5789  |



| $J'$ | $K'_a$ | $K'_c$ | $J''$ | $K''_a$ | $K''_c$ | Sym. | $v_{tCH_3}$ | $\nu_{Obs.}$ | $\nu_{Obs.} - \nu_{Calc.}$ | $E_{low}$ |
|------|--------|--------|-------|---------|---------|------|-------------|--------------|----------------------------|-----------|
| 60   | 50     | 11     | 59    | 49      | 11      | E    | 0           | 933274.241   | 0.524                      | 887.5923  |
| 60   | 50     | 10     | 59    | 49      | 10      | E    | 0           | 933312.689   | -0.062                     | 887.5842  |
| 62   | 49     | 14     | 61    | 48      | 13      | A    | 0           | 934103.747   | -0.056                     | 893.9675  |
| 62   | 49     | 13     | 61    | 48      | 14      | A    | 0           | 934103.747   | -0.056                     | 893.9675  |
| 66   | 47     | 20     | 65    | 46      | 19      | A    | 0           | 935731.575   | -0.174                     | 910.4294  |
| 66   | 47     | 19     | 65    | 46      | 20      | A    | 0           | 935731.575   | -0.174                     | 910.4294  |
| 68   | 46     | 22     | 67    | 45      | 23      | A    | 0           | 936517.703   | -0.251                     | 920.5119  |
| 68   | 46     | 23     | 67    | 45      | 22      | A    | 0           | 936517.703   | -0.251                     | 920.5119  |
| 55   | 53     | 2      | 54    | 52      | 2       | E    | 0           | 936882.329   | -0.036                     | 886.8101  |
| 55   | 53     | 2      | 54    | 52      | 2       | E    | 0           | 936882.329   | -0.036                     | 886.8101  |
| 55   | 53     | 2      | 54    | 52      | 2       | E    | 0           | 936882.329   | -0.036                     | 886.8101  |
| 55   | 53     | 2      | 54    | 52      | 2       | E    | 0           | 936882.329   | -0.036                     | 886.8101  |
| 70   | 45     | 26     | 69    | 44      | 25      | A    | 0           | 937277.784   | 0.195                      | 931.8359  |
| 70   | 45     | 25     | 69    | 44      | 26      | A    | 0           | 937277.784   | 0.195                      | 931.8359  |
| 57   | 52     | 6      | 56    | 51      | 6       | E    | 0           | 937690.613   | 0.337                      | 889.9576  |
| 57   | 52     | 5      | 56    | 51      | 6       | A    | 0           | 937698.314   | -0.279                     | 889.9441  |
| 57   | 52     | 6      | 56    | 51      | 5       | A    | 0           | 937698.314   | -0.279                     | 889.9441  |
| 57   | 52     | 5      | 56    | 51      | 5       | E    | 0           | 937734.324   | 0.005                      | 889.9522  |
| 59   | 51     | 9      | 58    | 50      | 8       | A    | 0           | 938542.686   | -0.122                     | 894.3054  |
| 59   | 51     | 8      | 58    | 50      | 9       | A    | 0           | 938542.686   | -0.122                     | 894.3054  |
| 61   | 50     | 11     | 60    | 49      | 12      | A    | 0           | 939380.720   | -0.180                     | 899.8875  |
| 61   | 50     | 12     | 60    | 49      | 11      | A    | 0           | 939380.720   | -0.180                     | 899.8875  |
| 61   | 50     | 12     | 60    | 49      | 12      | E    | 0           | 939384.009   | 0.521                      | 899.9009  |
| 63   | 49     | 15     | 62    | 48      | 14      | A    | 0           | 940209.978   | -0.218                     | 906.6938  |
| 63   | 49     | 14     | 62    | 48      | 15      | A    | 0           | 940209.978   | -0.218                     | 906.6938  |
| 63   | 49     | 15     | 62    | 48      | 15      | E    | 0           | 940218.416   | 0.223                      | 906.7069  |
| 65   | 48     | 17     | 64    | 47      | 18      | A    | 0           | 941027.282   | -0.031                     | 914.7282  |
| 65   | 48     | 18     | 64    | 47      | 17      | A    | 0           | 941027.282   | -0.031                     | 914.7282  |
| 67   | 47     | 21     | 66    | 46      | 20      | A    | 0           | 941827.633   | -0.361                     | 923.9950  |
| 67   | 47     | 20     | 66    | 46      | 21      | A    | 0           | 941827.633   | -0.361                     | 923.9950  |
| 69   | 46     | 23     | 68    | 45      | 24      | A    | 0           | 942606.623   | -0.265                     | 934.4993  |
| 69   | 46     | 24     | 68    | 45      | 23      | A    | 0           | 942606.623   | -0.265                     | 934.4993  |
| 58   | 52     | 7      | 57    | 51      | 7       | E    | 0           | 943803.535   | 0.203                      | 901.6402  |
| 58   | 52     | 6      | 57    | 51      | 7       | A    | 0           | 943811.569   | -0.050                     | 901.6268  |
| 58   | 52     | 7      | 57    | 51      | 6       | A    | 0           | 943811.569   | -0.050                     | 901.6268  |
| 66   | 48     | 18     | 65    | 47      | 19      | A    | 0           | 947127.050   | -0.195                     | 928.0812  |
| 66   | 48     | 19     | 65    | 47      | 18      | A    | 0           | 947127.050   | -0.195                     | 928.0812  |
