# Supplementary material for: Millimeter-Wave Spectroscopy of Methylfuran Isomers: Local vs. Global Treatments of the Internal Rotation
Source: MDPI journal article supplement (doi:10.3390/molecules27113591), 2022-06-02
Supplement: s1 [file s1]

# Supporting Informations - table S2

Table S2: Molecular constants in the RAM system of 3-methylfuran obtained by a global fit using program BELGI-C<sub>s</sub>.

| Operator <sup>a</sup>                                         | Constant <sup>b</sup> | Unit             | Present work <sup>c</sup>      |
|---------------------------------------------------------------|-----------------------|------------------|--------------------------------|
| $P_a^2$                                                       | A                     | cm <sup>-1</sup> | 0.29655253(32)                 |
| $P_b^2$                                                       | B                     | cm <sup>-1</sup> | 0.11235429(31)                 |
| $P_c^2$                                                       | C                     | cm <sup>-1</sup> | 0.0827138179(94)               |
| $\{P_a, P_b\}$                                                | D <sub>ab</sub>       | cm <sup>-1</sup> | -0.000615(48)                  |
| $-P^4$                                                        | $\Delta_J$            | cm <sup>-1</sup> | 0.8094(27)*10 <sup>-8</sup>    |
| $-P^2 P_a^2$                                                  | $\Delta_{JK}$         | cm <sup>-1</sup> | 0.7023(16)*10 <sup>-7</sup>    |
| $-P_a^4$                                                      | $\Delta_K$            | cm <sup>-1</sup> | 0.4421(39)*10 <sup>-7</sup>    |
| $-2P^2(P_b^2 - P_c^2)$                                        | $\delta_J$            | cm <sup>-1</sup> | 0.214090(83) *10 <sup>-8</sup> |
| $-\{P_a^2, (P_b^2 - P_c^2)\}$                                 | $\delta_K$            | cm <sup>-1</sup> | 0.39601(17)*10 <sup>-7</sup>   |
| $P_\alpha^2$                                                  | F                     | cm <sup>-1</sup> | 5.3217(26)                     |
| $(1/2)(1 - \cos(3\alpha))$                                    | V <sub>3</sub>        | cm <sup>-1</sup> | 357.77(22)                     |
| $(1/2)(1 - \cos(6\alpha))$                                    | V <sub>6</sub>        | cm <sup>-1</sup> | -2.481(13)                     |
| $P_a P_\gamma$                                                | $\rho$                | unitless         | 0.05564643(33)                 |
| $(1 - \cos 3\alpha)P_a^2$                                     | k <sub>5</sub>        | cm <sup>-1</sup> | 0.226600(82)*10 <sup>-3</sup>  |
| $(1 - \cos 3\alpha)P^2$                                       | F <sub>v</sub>        | cm <sup>-1</sup> | -0.12522(16)*10 <sup>-3</sup>  |
| $(1 - \cos 3\alpha)(P_b^2 - P_c^2)$                           | c <sub>2</sub>        | cm <sup>-1</sup> | -0.527100(72)*10 <sup>-4</sup> |
| $P_\alpha^2 \{P_a, P_b\}$                                     | $\Delta_{ab}$         | cm <sup>-1</sup> | —                              |
| $P_a P_\alpha P^2$                                            | L <sub>v</sub>        | cm <sup>-1</sup> | 0.3885(29)*10 <sup>-6</sup>    |
| $P_\alpha^2 P^2$                                              | G <sub>v</sub>        | cm <sup>-1</sup> | -0.8908(60)*10 <sup>-6</sup>   |
| $P_\alpha^4$                                                  | k <sub>4</sub>        | cm <sup>-1</sup> | —                              |
| $(1 - \cos 6\alpha)P^2$                                       | N <sub>v</sub>        | cm <sup>-1</sup> | —                              |
| $P_a^6$                                                       | H <sub>K</sub>        | cm <sup>-1</sup> | -0.138(75)*10 <sup>-10</sup>   |
| $(1 - \cos 3\gamma)P_a^2 P^2$                                 | k <sub>5J</sub>       | cm <sup>-1</sup> | 0.544 (40)*10 <sup>-9</sup>    |
| $N_{\nu t=0}/N_{\nu t=1}/N_{tot}$ <sup>d</sup>                |                       |                  | 2463/ 2017/ 4480               |
| $\sigma_{\nu t=0}/\sigma_{\nu t=1}/\sigma_{tot}$ <sup>d</sup> |                       |                  | kHz 181/ 174/ 178              |

<sup>a</sup> All constants refer to a rho-axis system, therefore the inertia tensor is not diagonal and the constants cannot be directly compared to those of a principal axis system. P<sub>a</sub>, P<sub>b</sub>, P<sub>c</sub> are the components of the overall rotation angular momentum, P<sub>γ</sub> is the angular momentum of the internal rotor rotating around the internal rotor axis by an angle γ. {u,v} is the anti commutator uv + vu.

<sup>b</sup> The product of the parameter and operator from a given row yields the term actually used in the vibration-rotation-torsion Hamiltonian, except for F, ρ and A, which occur in the Hamiltonian in the form  $F(P_\gamma - \rho P_a)^2 + AP_a^2$ .

<sup>c</sup> Values of the parameters from the present fit. Statistical uncertainties are shown as one standard uncertainty in the last digit. <sup>d</sup>  $N_{\nu t=0}/N_{\nu t=1}/N_{tot}$  are the numbers of νt = 0 transitions, νt = 1 transitions and the total number of transitions. In the fit 1845 and 1538 distinct frequencies were taken into account for ν<sub>t</sub> = 0 state and 1 respectively. 30 transitions from Ogata et al.[?] were weighted 100 kHz and fit with an rms of 116 kHz. Present data was weighted 150 kHz and fit with an rms of 178 kHz.

$\sigma_{\nu t=0}/\sigma_{\nu t=1}/\sigma_{tot}$  are the respective standard deviations.
