# Supplementary material for: Millimeter-Wave Spectroscopy of Methylfuran Isomers: Local vs. Global Treatments of the Internal Rotation
Source: MDPI journal article supplement (doi:10.3390/molecules27113591), 2022-06-02
Supplement: s1 [file s1]

Supporting Informations - Line list of 3-methylfuran  
Millimeter-wave spectroscopy of methylfuran isomers: local vs  
global treatments of the internal rotation

Jonas Bruckhuisen, Sathapana Chawananon, Isabelle Kleiner, Anthony Roucou,  
Guillaume Dhont, Colwyn Bracquart, Pierre Asselin and Arnaud Cuisset

Table S4: Line list of the rotational transitions frequencies ( $\nu_{Obs.}$ ) of 3-methylfuran measured in the microwave region by T. Ogata *et al.* (T. Ogata, K. Kozima, B. Chem. Soc. Jpn., 44 (1971), 2344-2346) and in the 70-220 GHz range in this study. The frequencies were fitted globally for the ground and excited torsional states using the BELGI-C<sub>s</sub> code.

| $J'$        | $K'_a$ | $K'_c$ | $J''$       | $K''_a$ | $K''_c$ | Sym. | $v_{tCH_3}$ | $\nu_{Obs.}$<br>MHz | $\nu_{Obs.} - \nu_{Calc.}$<br>MHz | $E_{low}$<br>cm <sup>-1</sup> |
|-------------|--------|--------|-------------|---------|---------|------|-------------|---------------------|-----------------------------------|-------------------------------|
| upper level |        |        | lower level |         |         |      |             |                     |                                   |                               |
| 3           | -1     | 2      | 3           | 0       | 3       | E    | 0           | 9049.310            | -0.120                            | 62.770                        |
| 3           | 1      | 2      | 3           | 0       | 3       | A    | 0           | 9052.390            | -0.107                            | 62.752                        |
| 2           | 1      | 2      | 1           | 1       | 1       | A    | 0           | 10804.930           | 0.044                             | 61.978                        |
| 2           | 1      | 2      | 1           | 1       | 1       | E    | 0           | 10805.940           | 0.133                             | 61.995                        |
| 1           | 1      | 1      | 0           | 0       | 0       | E    | 0           | 11367.740           | 0.069                             | 61.616                        |
| 1           | 1      | 1      | 0           | 0       | 0       | A    | 0           | 11372.400           | -0.168                            | 61.599                        |
| 4           | -1     | 3      | 4           | 0       | 4       | E    | 0           | 11525.900           | -0.040                            | 63.519                        |
| 4           | 1      | 3      | 4           | 0       | 4       | A    | 0           | 11528.800           | 0.032                             | 63.502                        |
| 2           | 0      | 2      | 1           | 0       | 1       | E    | 0           | 11593.800           | -0.075                            | 61.811                        |
| 2           | 0      | 2      | 1           | 0       | 1       | A    | 0           | 11593.800           | -0.128                            | 61.794                        |
| 3           | 0      | 3      | 2           | 1       | 2       | A    | 0           | 12415.000           | -0.006                            | 62.338                        |
| 3           | 0      | 3      | 2           | 1       | 2       | E    | 0           | 12418.800           | 0.081                             | 62.356                        |
| 2           | -1     | 1      | 1           | 1       | 0       | E    | 0           | 12579.350           | 0.174                             | 62.025                        |
| 2           | 1      | 1      | 1           | 1       | 0       | A    | 0           | 12580.180           | 0.093                             | 62.008                        |
| 4           | 2      | 2      | 4           | 1       | 3       | A    | 0           | 15084.600           | -0.117                            | 63.886                        |
| 3           | 2      | 1      | 3           | 1       | 2       | A    | 0           | 15797.840           | -0.046                            | 63.054                        |
| 2           | 1      | 2      | 1           | 0       | 1       | E    | 0           | 16327.270           | 0.044                             | 61.811                        |
| 2           | 1      | 2      | 1           | 0       | 1       | A    | 0           | 16331.290           | 0.085                             | 61.794                        |
| 3           | 0      | 3      | 2           | 0       | 2       | A    | 0           | 17152.280           | -0.002                            | 62.180                        |
| 3           | 2      | 2      | 2           | 2       | 1       | A    | 0           | 17538.950           | 0.263                             | 62.980                        |
| 3           | 2      | 1      | 2           | 2       | 0       | A    | 0           | 17925.170           | 0.040                             | 62.983                        |
| 3           | 1      | 2      | 2           | 1       | 1       | A    | 0           | 18804.800           | 0.101                             | 62.427                        |
| 4           | 0      | 4      | 3           | 0       | 3       | E    | 0           | 22464.070           | -0.185                            | 62.770                        |
| 4           | 0      | 4      | 3           | 0       | 3       | A    | 0           | 22464.630           | -0.088                            | 62.752                        |
| 4           | 2      | 3      | 4           | 1       | 4       | A    | 0           | 22507.750           | -0.205                            | 63.592                        |
| 4           | 2      | 3      | 3           | 2       | 2       | E    | 0           | 23314.120           | -0.142                            | 63.582                        |
| 4           | 3      | 2      | 3           | 3       | 1       | A    | 0           | 23563.030           | 0.092                             | 64.563                        |
| 4           | 3      | 2      | 3           | 3       | 1       | E    | 0           | 23581.140           | -0.007                            | 64.576                        |
| 4           | -3     | 1      | 3           | 3       | 0       | E    | 0           | 23586.150           | 0.156                             | 64.583                        |
| 4           | 3      | 1      | 3           | 3       | 0       | A    | 0           | 23603.850           | -0.102                            | 64.563                        |
| 26          | 8      | 18     | 26          | 7       | 19      | E    | 0           | 70006.009           | -0.296                            | 141.8204                      |
| 38          | 10     | 28     | 38          | 9       | 29      | A    | 0           | 70028.165           | 0.143                             | 227.7970                      |
| 12          | 3      | 10     | 11          | 3       | 9       | E    | 1           | 70160.889           | 0.049                             | 192.6572                      |
| 22          | 7      | 16     | 22          | 6       | 17      | E    | 1           | 70331.904           | 0.228                             | 235.3608                      |
| 12          | 11     | 1      | 11          | 11      | 0       | A    | 0           | 70584.700           | 0.183                             | 98.5698                       |
| 12          | 11     | 2      | 11          | 11      | 1       | A    | 0           | 70584.700           | 0.183                             | 98.5698                       |
| 12          | 11     | 1      | 11          | 11      | 0       | E    | 0           | 70584.700           | -0.035                            | 98.5844                       |
| 12          | 11     | 2      | 11          | 11      | 1       | E    | 0           | 70584.700           | -0.035                            | 98.5652                       |
| 12          | 10     | 2      | 11          | 10      | 1       | E    | 1           | 70588.815           | 0.263                             | 211.1144                      |
| 12          | 10     | 3      | 11          | 10      | 2       | E    | 1           | 70593.932           | -0.151                            | 210.5314                      |
| 12          | 10     | 2      | 11          | 10      | 1       | A    | 1           | 70599.659           | -0.070                            | 211.0389                      |
| 12          | 10     | 3      | 11          | 10      | 2       | A    | 1           | 70599.659           | -0.070                            | 211.0389                      |
| 12          | 10     | 2      | 11          | 10      | 1       | A    | 0           | 70636.082           | 0.179                             | 94.4015                       |
| 12          | 10     | 3      | 11          | 10      | 2       | A    | 0           | 70636.082           | 0.179                             | 94.4015                       |
| 12          | 10     | 2      | 11          | 10      | 1       | E    | 0           | 70636.082           | -0.086                            | 94.4175                       |
| 12          | 10     | 3      | 11          | 10      | 2       | E    | 0           | 70636.082           | -0.086                            | 94.3991                       |
| 12          | 9      | 3      | 11          | 9       | 2       | E    | 1           | 70654.886           | -0.048                            | 207.3080                      |
| 12          | 9      | 4      | 11          | 9       | 3       | E    | 1           | 70664.934           | 0.072                             | 206.7589                      |
| 12          | 9      | 4      | 11          | 9       | 3       | A    | 1           | 70670.043           | -0.052                            | 207.3078                      |
| 12          | 9      | 3      | 11          | 9       | 2       | A    | 1           | 70670.043           | -0.052                            | 207.3078                      |
| 8           | 3      | 6      | 7           | 2       | 5       | E    | 0           | 70699.679           | -0.194                            | 68.1308                       |
| 12          | 9      | 3      | 11          | 9       | 2       | E    | 0           | 70705.118           | -0.557                            | 90.6493                       |
| 12          | 9      | 4      | 11          | 9       | 3       | E    | 0           | 70705.118           | -0.557                            | 90.6320                       |
| 12          | 9      | 3      | 11          | 9       | 2       | A    | 0           | 70705.506           | 0.151                             | 90.6320                       |
| 12          | 9      | 4      | 11          | 9       | 3       | A    | 0           | 70705.506           | 0.151                             | 90.6320                       |
| 8           | 3      | 6      | 7           | 2       | 5       | A    | 0           | 70722.487           | -0.398                            | 68.1139                       |
| 12          | 8      | 4      | 11          | 8       | 3       | E    | 1           | 70747.970           | 0.037                             | 203.8989                      |
| 12          | 8      | 5      | 11          | 8       | 4       | E    | 1           | 70764.585           | -0.110                            | 203.3912                      |
| 12          | 8      | 4      | 11          | 8       | 3       | A    | 1           | 70768.915           | 0.126                             | 203.9740                      |
| 12          | 8      | 5      | 11          | 8       | 4       | A    | 1           | 70768.915           | 0.126                             | 203.9740                      |
| 12          | 7      | 5      | 11          | 7       | 4       | E    | 1           | 70884.569           | -0.104                            | 200.8888                      |
| 12          | 7      | 6      | 11          | 7       | 5       | E    | 1           | 70912.733           | -0.123                            | 200.4298                      |
| 12          | 7      | 6      | 11          | 7       | 5       | A    | 1           | 70914.336           | -0.012                            | 201.0386                      |
| 12          | 7      | 5      | 11          | 7       | 4       | A    | 1           | 70914.336           | -0.012                            | 201.0386                      |
| 12          | 7      | 5      | 11          | 7       | 4       | A    | 0           | 70946.960           | 0.023                             | 84.2935                       |
| 12          | 7      | 6      | 11          | 7       | 5       | A    | 0           | 70946.960           | 0.023                             | 84.2935                       |
| 12          | 7      | 5      | 11          | 7       | 4       | E    | 0           | 70946.960           | -0.017                            | 84.3127                       |
| 12          | 7      | 6      | 11          | 7       | 5       | E    | 0           | 70948.002           | 0.122                             | 84.2981                       |
| 13          | 1      | 12     | 12          | 2       | 11      | A    | 0           | 70988.484           | 0.013                             | 77.1668                       |
| 13          | 1      | 12     | 12          | 2       | 11      | E    | 0           | 70988.484           | 0.074                             | 77.1835                       |
| 13          | 1      | 12     | 12          | 2       | 11      | E    | 1           | 70989.738           | 0.135                             | 193.4794                      |
| 12          | 6      | 7      | 11          | 6       | 6       | A    | 1           | 71138.299           | -0.060                            | 198.5040                      |
| 12          | 6      | 6      | 11          | 6       | 5       | A    | 1           | 71150.887           | -0.009                            | 198.5042                      |
| 12          | 6      | 7      | 11          | 6       | 6       | A    | 0           | 71168.970           | 0.050                             | 81.7289                       |
| 12          | 6      | 6      | 11          | 6       | 5       | E    | 0           | 71174.955           | 0.012                             | 81.7487                       |
| 12          | 6      | 7      | 11          | 6       | 6       | E    | 0           | 71176.213           | 0.060                             | 81.7359                       |
| 12          | 6      | 6      | 11          | 6       | 5       | A    | 0           | 71180.918           | 0.030                             | 81.7291                       |
| 21          | 8      | 14     | 21          | 7       | 14      | E    | 1           | 71302.155           | 0.523                             | 233.7008                      |
| 12          | 4      | 9      | 11          | 4       | 8       | A    | 1           | 71430.541           | -0.300                            | 194.6385                      |
| 12          | 5      | 8      | 11          | 5       | 7       | A    | 1           | 71443.652           | -0.040                            | 196.3741                      |
| 13          | 2      | 12     | 12          | 2       | 11      | A    | 1           | 71463.714           | -0.047                            | 194.0147                      |
| 12          | 4      | 9      | 11          | 4       | 8       | A    | 0           | 71470.218           | 0.075                             | 77.8156                       |
| 12          | 5      | 8      | 11          | 5       | 7       | A    | 0           | 71473.819           | 0.298                             | 79.5729                       |
| 12          | 4      | 9      | 11          | 4       | 8       | E    | 0           | 71473.819           | -0.127                            | 77.8310                       |
| 12          | 5      | 7      | 11          | 5       | 6       | E    | 1           | 71477.770           | -0.090                            | 196.0827                      |
| 12          | 5      | 8      | 11          | 5       | 7       | E    | 0           | 71515.744           | 0.007                             | 79.5840                       |
| 13          | 2      | 12     | 12          | 2       | 11      | E    | 0           | 71523.806           | -0.006                            | 77.1835                       |
| 13          | 2      | 12     | 12          | 2       | 11      | A    | 0           | 71525.439           | 0.051                             | 77.1668                       |
| 12          | 5      | 8      | 11          | 5       | 7       | E    | 1           | 71571.038           | -0.037                            | 195.7421                      |
| 18          | 2      | 16     | 18          | 1       | 17      | E    | 0           | 71634.611           | 0.008                             | 93.9945                       |
| 12          | 5      | 7      | 11          | 5       | 6       | E    | 0           | 71643.901           | 0.050                             | 79.5960                       |
| 12          | 5      | 7      | 11          | 5       | 6       | A    | 1           | 71662.039           | -0.020                            | 196.3795                      |
| 12          | 5      | 7      | 11          | 5       | 6       | A    | 0           | 71684.277           | 0.067                             | 79.5781                       |
| 14          | 0      | 14     | 13          | 1       | 13      | A    | 1           | 71764.815           | -0.006                            | 194.5207                      |
| 14          | 1      | 14     | 13          | 1       | 13      | A    | 1           | 71772.743           | -0.003                            | 194.5207                      |
| 23          | 6      | 18     | 23          | 5       | 19      | A    | 1           | 71776.642           | 0.101                             | 238.0513                      |
| 14          | 0      | 14     | 13          | 0       | 13      | A    | 1           | 71780.330           | 0.012                             | 194.5202                      |
| 14          | 0      | 14     | 13          | 1       | 13      | E    | 1           | 71783.581           | -0.074                            | 193.9726                      |
| 14          | 1      | 14     | 13          | 1       | 13      | E    | 1           | 71792.063           | -0.111                            | 193.9726                      |
| 14          | 0      | 14     | 13          | 1       | 13      | A    | 0           | 71798.846           | -0.334                            | 77.6624                       |
| 14          | 0      | 14     | 13          | 1       | 13      | E    | 0           | 71798.846           | 0.223                             | 77.6795                       |
| 14          | 0      | 14     | 13          | 0       | 13      | E    | 1           | 71800.149           | -0.036                            | 193.9720                      |
| 14          | 1      | 14     | 13          | 1       | 13      | A    | 0           | 71807.343           | -0.309                            | 77.6624                       |
| 14          | 1      | 14     | 13          | 1       | 13      | E    | 0           | 71807.343           | 0.278                             | 77.6795                       |
| 14          | 0      | 14     | 13          | 0       | 13      | A    | 0           | 71815.560           | -0.112                            | 77.6618                       |
| 14          | 1      | 14     | 13          | 0       | 13      | E    | 0           | 71823.673           | 0.169                             | 77.6789                       |
| 20          | 5      | 15     | 19          | 6       | 13      | E    | 1           | 71828.190           | 0.150                             | 223.0317                      |
| 13          | 1      | 12     | 12          | 1       | 11      | A    | 1           | 71831.699           | 0.000                             | 193.9854                      |
| 13          | 1      | 12     | 12          | 1       | 11      | E    | 1           | 71903.042           | -0.102                            | 193.4489                      |

| $J'$ | $K'_a$ | $K'_c$ | $J''$ | $K''_a$ | $K''_c$ | Sym. | $v_{tCH_3}$ | $\nu_{Obs.}$ | $\nu_{Obs.} - \nu_{Calc.}$ | $E_{low}$ |
|------|--------|--------|-------|---------|---------|------|-------------|--------------|----------------------------|-----------|
| 13   | 1      | 12     | 12    | 1       | 11      | E    | 0           | 71906.367    | 0.013                      | 77.1529   |
| 13   | 1      | 12     | 12    | 1       | 11      | A    | 0           | 71908.829    | 0.059                      | 77.1361   |
| 12   | 4      | 9      | 11    | 4       | 8       | E    | 1           | 72117.865    | 0.142                      | 194.0392  |
| 23   | 6      | 18     | 23    | 5       | 19      | A    | 0           | 72289.721    | -0.176                     | 121.2795  |
| 38   | 9      | 29     | 38    | 8       | 30      | E    | 1           | 72299.171    | -0.419                     | 341.6625  |
| 38   | 9      | 29     | 38    | 8       | 30      | A    | 0           | 72422.684    | 0.012                      | 225.3812  |
| 13   | 2      | 12     | 12    | 1       | 11      | E    | 1           | 72437.836    | -0.292                     | 193.4489  |
| 12   | 4      | 8      | 11    | 4       | 7       | E    | 1           | 72524.468    | -0.135                     | 194.3149  |
| 20   | 4      | 17     | 20    | 3       | 18      | A    | 1           | 72570.450    | 0.120                      | 220.4504  |
| 20   | 7      | 14     | 20    | 6       | 15      | A    | 1           | 72623.116    | 0.226                      | 227.2237  |
| 26   | 7      | 20     | 25    | 8       | 17      | A    | 1           | 72656.757    | -0.317                     | 255.5615  |
| 25   | 8      | 17     | 25    | 7       | 18      | A    | 1           | 72694.652    | 0.315                      | 253.1367  |
| 37   | 10     | 27     | 37    | 9       | 28      | E    | 0           | 72778.334    | 0.153                      | 219.7988  |
| 12   | 2      | 10     | 11    | 2       | 9       | A    | 1           | 72784.511    | -0.023                     | 192.8305  |
| 22   | 7      | 16     | 22    | 6       | 17      | A    | 1           | 72814.008    | 0.359                      | 235.8433  |
| 37   | 10     | 27     | 37    | 9       | 28      | A    | 0           | 72845.529    | 0.141                      | 219.7864  |
| 39   | 5      | 35     | 38    | 5       | 33      | E    | 0           | 72845.529    | -0.007                     | 213.8059  |
| 12   | 2      | 10     | 11    | 2       | 9       | E    | 0           | 72882.830    | -0.017                     | 75.9979   |
| 12   | 2      | 10     | 11    | 2       | 9       | A    | 0           | 72885.948    | -0.029                     | 75.9811   |
| 35   | 8      | 27     | 35    | 7       | 28      | E    | 1           | 72939.628    | -0.001                     | 316.1757  |
| 33   | 7      | 26     | 32    | 9       | 23      | E    | 1           | 73003.045    | -0.248                     | 299.6214  |
| 41   | 10     | 31     | 41    | 9       | 32      | A    | 0           | 73020.523    | -0.009                     | 252.9268  |
| 41   | 10     | 31     | 41    | 9       | 32      | E    | 0           | 73026.005    | -0.006                     | 252.9381  |
| 35   | 8      | 27     | 35    | 7       | 28      | A    | 0           | 73253.697    | 0.102                      | 199.8822  |
| 35   | 8      | 27     | 35    | 7       | 28      | E    | 0           | 73281.948    | 0.034                      | 199.8943  |
| 12   | 4      | 8      | 11    | 4       | 7       | A    | 1           | 73284.764    | -0.056                     | 194.7122  |
| 12   | 4      | 8      | 11    | 4       | 7       | E    | 0           | 73285.402    | 0.017                      | 77.9034   |
| 35   | 4      | 31     | 34    | 5       | 29      | E    | 0           | 73285.402    | 0.017                      | 186.0950  |
| 12   | 4      | 8      | 11    | 4       | 7       | A    | 0           | 73286.604    | 0.075                      | 77.8875   |
| 18   | 7      | 12     | 18    | 6       | 13      | A    | 1           | 73314.806    | 0.122                      | 219.4061  |
| 22   | 7      | 16     | 22    | 6       | 17      | E    | 0           | 73575.107    | -0.226                     | 119.0990  |
| 35   | 8      | 27     | 35    | 7       | 28      | A    | 1           | 73595.403    | -0.126                     | 316.5564  |
| 22   | 7      | 16     | 22    | 6       | 17      | A    | 0           | 73626.420    | -0.307                     | 119.0854  |
| 23   | 4      | 19     | 23    | 3       | 20      | A    | 1           | 73653.254    | 0.057                      | 235.4394  |
| 19   | 7      | 13     | 19    | 6       | 14      | E    | 0           | 73666.607    | -0.268                     | 106.4615  |
| 17   | 7      | 10     | 17    | 6       | 11      | A    | 0           | 73674.633    | -0.164                     | 99.0725   |
| 31   | 9      | 22     | 31    | 8       | 23      | E    | 0           | 73789.502    | -0.148                     | 174.1482  |
| 23   | 4      | 19     | 23    | 3       | 20      | A    | 0           | 73812.409    | 0.140                      | 118.6526  |
| 22   | 5      | 18     | 22    | 4       | 19      | E    | 0           | 73812.409    | 0.031                      | 118.6674  |
| 31   | 9      | 22     | 31    | 8       | 23      | A    | 0           | 73817.159    | -0.042                     | 114.3182  |
| 25   | 8      | 17     | 25    | 7       | 18      | E    | 0           | 73857.136    | -0.121                     | 174.1353  |
| 18   | 7      | 12     | 18    | 6       | 13      | A    | 0           | 73926.544    | -0.334                     | 136.4119  |
| 23   | 7      | 17     | 23    | 6       | 18      | A    | 0           | 74215.957    | -0.293                     | 102.6393  |
| 32   | 7      | 25     | 32    | 6       | 26      | E    | 1           | 74228.592    | -0.176                     | 123.6908  |
| 22   | 5      | 18     | 22    | 3       | 19      | A    | 1           | 74228.592    | 0.114                      | 292.7438  |
| 16   | 7      | 10     | 16    | 6       | 11      | A    | 1           | 74240.665    | 0.096                      | 231.0662  |
| 45   | 11     | 34     | 44    | 13      | 31      | A    | 1           | 74276.546    | 0.079                      | 212.4074  |
| 24   | 7      | 18     | 24    | 6       | 19      | A    | 1           | 74291.834    | -0.062                     | 408.6366  |
| 32   | 7      | 25     | 32    | 6       | 26      | A    | 0           | 74571.990    | 0.111                      | 245.2369  |
| 32   | 7      | 25     | 32    | 6       | 26      | E    | 0           | 74582.081    | 0.228                      | 176.4412  |
| 32   | 7      | 25     | 32    | 6       | 26      | E    | 0           | 74609.029    | 0.278                      | 176.4538  |
| 32   | 7      | 25     | 32    | 6       | 26      | A    | 1           | 74893.145    | -0.121                     | 293.1430  |
| 32   | 10     | 22     | 31    | 11      | 20      | E    | 1           | 74962.667    | 0.075                      | 300.4535  |
| 12   | 3      | 9      | 11    | 3       | 8       | E    | 1           | 74980.086    | -0.204                     | 193.1079  |
| 14   | 7      | 7      | 14    | 6       | 8       | A    | 1           | 75019.739    | 0.165                      | 206.2365  |
| 24   | 6      | 19     | 24    | 5       | 20      | A    | 1           | 75071.857    | 0.008                      | 242.7328  |
| 43   | 11     | 32     | 43    | 10      | 33      | E    | 0           | 75131.426    | 0.406                      | 273.2928  |
| 14   | 7      | 8      | 14    | 6       | 9       | A    | 1           | 75136.901    | 0.314                      | 206.2324  |
| 43   | 11     | 32     | 43    | 10      | 33      | A    | 0           | 75171.899    | 0.315                      | 273.2814  |
| 26   | 5      | 21     | 26    | 4       | 22      | E    | 1           | 75175.846    | 0.155                      | 252.1185  |
| 16   | 7      | 10     | 16    | 6       | 11      | A    | 0           | 75183.977    | -0.309                     | 95.6379   |
| 12   | 3      | 9      | 11    | 3       | 8       | A    | 1           | 75185.822    | -0.040                     | 193.6174  |
| 29   | 6      | 23     | 29    | 5       | 24      | E    | 1           | 75217.004    | 0.262                      | 271.3846  |
| 12   | 3      | 9      | 11    | 3       | 8       | A    | 0           | 75227.920    | 0.184                      | 76.7748   |
| 12   | 3      | 9      | 11    | 3       | 8       | E    | 0           | 75227.920    | -0.121                     | 76.7913   |
| 24   | 7      | 18     | 24    | 6       | 19      | E    | 0           | 75255.795    | -0.172                     | 128.4996  |
| 24   | 7      | 18     | 24    | 6       | 19      | A    | 0           | 75292.273    | -0.220                     | 128.4861  |
| 13   | 3      | 11     | 12    | 3       | 10      | A    | 1           | 75343.057    | -0.060                     | 195.5273  |
| 26   | 5      | 21     | 26    | 4       | 22      | A    | 0           | 75366.320    | 0.134                      | 135.8067  |
| 26   | 5      | 21     | 26    | 4       | 22      | E    | 0           | 75375.869    | 0.120                      | 135.8207  |
| 15   | 7      | 8      | 15    | 6       | 9       | A    | 0           | 75388.594    | -0.318                     | 92.4552   |
| 13   | 3      | 11     | 12    | 3       | 10      | E    | 0           | 75408.178    | -0.048                     | 78.7068   |
| 13   | 3      | 11     | 12    | 3       | 10      | A    | 0           | 75409.534    | 0.049                      | 78.6906   |
| 15   | 7      | 8      | 15    | 6       | 9       | E    | 0           | 75456.869    | -0.264                     | 92.4718   |
| 15   | 7      | 9      | 15    | 6       | 10      | E    | 0           | 75484.378    | -0.291                     | 92.4566   |
| 13   | 3      | 11     | 12    | 3       | 10      | E    | 1           | 75502.439    | 0.000                      | 194.9976  |
| 29   | 6      | 23     | 29    | 5       | 24      | A    | 0           | 75510.328    | 0.269                      | 155.0760  |
| 29   | 6      | 23     | 29    | 5       | 24      | E    | 0           | 75529.827    | 0.346                      | 155.0893  |
| 14   | 7      | 8      | 14    | 6       | 8       | E    | 0           | 75529.827    | 0.346                      | 89.4825   |
| 24   | 6      | 19     | 24    | 5       | 20      | E    | 0           | 75531.496    | -0.052                     | 125.9802  |
| 24   | 6      | 19     | 24    | 5       | 20      | A    | 0           | 75550.145    | -0.141                     | 125.9660  |
| 17   | 7      | 10     | 17    | 6       | 11      | E    | 1           | 75624.366    | -0.245                     | 215.5832  |
| 15   | 7      | 9      | 15    | 6       | 10      | A    | 0           | 75638.632    | -0.328                     | 92.4463   |
| 29   | 6      | 23     | 29    | 5       | 24      | A    | 1           | 75688.881    | -0.030                     | 271.8063  |
| 17   | 1      | 16     | 17    | 1       | 17      | E    | 1           | 75801.216    | 0.325                      | 204.5436  |
| 43   | 9      | 35     | 42    | 10      | 32      | A    | 0           | 75814.405    | 0.644                      | 264.2236  |
| 44   | 11     | 33     | 44    | 10      | 34      | E    | 0           | 75814.405    | 0.195                      | 282.5282  |
| 44   | 11     | 33     | 44    | 10      | 34      | A    | 0           | 75832.371    | 0.135                      | 282.5172  |
| 14   | 7      | 8      | 14    | 6       | 9       | E    | 0           | 75923.550    | -0.436                     | 89.4693   |
| 14   | 7      | 7      | 14    | 6       | 8       | A    | 0           | 75929.106    | -0.341                     | 89.4644   |
| 14   | 7      | 7      | 14    | 6       | 8       | E    | 0           | 75961.087    | -0.271                     | 89.4825   |
| 21   | 3      | 18     | 21    | 2       | 19      | A    | 1           | 76004.315    | 0.049                      | 224.3176  |
| 6    | 4      | 3      | 5     | 3       | 3       | E    | 1           | 76116.451    | 0.209                      | 182.5538  |
| 24   | 8      | 16     | 24    | 7       | 17      | A    | 1           | 76123.775    | 0.320                      | 247.9709  |
| 14   | 1      | 13     | 13    | 2       | 12      | A    | 1           | 76187.225    | 0.041                      | 196.3984  |
| 25   | 7      | 19     | 25    | 6       | 20      | A    | 1           | 76206.354    | 0.310                      | 250.2133  |
| 14   | 1      | 13     | 13    | 2       | 12      | E    | 1           | 76230.794    | 0.033                      | 195.8652  |
| 14   | 1      | 13     | 13    | 2       | 12      | A    | 0           | 76235.214    | 0.018                      | 79.5527   |
| 21   | 3      | 18     | 21    | 2       | 19      | E    | 0           | 76335.628    | 0.030                      | 107.5239  |
| 21   | 3      | 18     | 21    | 2       | 19      | A    | 0           | 76345.421    | -0.064                     | 107.5084  |
| 13   | 7      | 7      | 13    | 6       | 8       | A    | 0           | 76382.287    | -0.176                     | 86.6797   |
| 13   | 12     | 2      | 12    | 12      | 1       | E    | 1           | 76414.603    | -0.107                     | 221.6389  |
| 13   | 12     | 2      | 12    | 12      | 1       | A    | 1           | 76420.894    | -0.081                     | 222.0443  |
| 13   | 12     | 1      | 12    | 12      | 0       | A    | 1           | 76420.894    | -0.081                     | 222.0443  |
| 13   | 12     | 1      | 12    | 12      | 0       | A    | 0           | 76461.412    | 0.089                      | 105.4896  |
| 13   | 12     | 2      | 12    | 12      | 1       | A    | 0           | 76461.412    | 0.089                      | 105.4896  |
| 13   | 12     | 1      | 12    | 12      | 0       | E    | 0           | 76461.412    | -0.132                     | 105.5024  |
| 13   | 12     | 2      | 12    | 12      | 1       | E    | 0           | 76461.412    | -0.132                     | 105.4827  |
| 13   | 11     | 2      | 12    | 11      | 1       | A    | 1           | 76471.418    | -0.090                     | 217.5203  |
| 13   | 11     | 3      | 12    | 11      | 2       | A    | 1           | 76471.418    | -0.090                     | 217.5203  |
| 14   | 2      | 13     | 13    | 2       | 12      | A    | 1           | 76476.195    | -0.031                     | 196.3984  |
| 11   | 7      | 5      | 11    | 6       | 6       | E    | 1           | 76508.488    | -0.125                     | 197.8777  |
| 13   | 11     | 2      | 12    | 11      | 1       | A    | 0           | 76511.194    | 0.146                      | 100.9243  |
| 13   | 11     | 3      | 12    | 11      | 2       | A    | 0           | 76511.194    | 0.146                      | 100.9243  |
| 13   | 11     | 2      | 12    | 11      | 1       | E    | 0           | 76511.194    | -0.123                     | 100.9388  |
| 13   | 11     | 3      | 12    | 11      | 2       | E    | 0           | 76511.194    | -0.123                     | 100.9196  |

| $J'$ | $K'_a$ | $K'_c$ | $J''$ | $K''_a$ | $K''_c$ | Sym. | $v_{tCH_3}$ | $\nu_{Obs.}$ | $\nu_{Obs.} - \nu_{Calc.}$ | $E_{low}$ |
|------|--------|--------|-------|---------|---------|------|-------------|--------------|----------------------------|-----------|
| 13   | 10     | 3      | 12    | 10      | 2       | E    | 1           | 76523.417    | 0.026                      | 213.4689  |
| 13   | 10     | 4      | 12    | 10      | 3       | E    | 1           | 76531.196    | -0.097                     | 212.8861  |
| 14   | 2      | 13     | 13    | 2       | 12      | E    | 1           | 76536.681    | -0.156                     | 195.8652  |
| 13   | 10     | 4      | 12    | 10      | 3       | A    | 1           | 76537.676    | 0.000                      | 213.3938  |
| 13   | 10     | 3      | 12    | 10      | 2       | A    | 1           | 76537.676    | 0.000                      | 213.3938  |
| 14   | 2      | 13     | 13    | 2       | 12      | E    | 0           | 76539.568    | -0.018                     | 79.5693   |
| 14   | 2      | 13     | 13    | 2       | 12      | A    | 0           | 76541.275    | 0.002                      | 79.5527   |
| 42   | 11     | 31     | 42    | 10      | 32      | E    | 0           | 76568.093    | 0.455                      | 264.2351  |
| 13   | 10     | 3      | 12    | 10      | 2       | A    | 0           | 76576.452    | 0.164                      | 96.7576   |
| 13   | 10     | 4      | 12    | 10      | 3       | A    | 0           | 76576.452    | 0.164                      | 96.7576   |
| 13   | 10     | 3      | 12    | 10      | 2       | E    | 0           | 76576.452    | -0.105                     | 96.7737   |
| 13   | 10     | 4      | 12    | 10      | 3       | E    | 0           | 76576.452    | -0.105                     | 96.7553   |
| 34   | 11     | 23     | 33    | 12      | 22      | E    | 0           | 76576.452    | -0.105                     | 201.1379  |
| 12   | 7      | 6      | 12    | 6       | 7       | E    | 0           | 76584.312    | -0.271                     | 84.1101   |
| 13   | 9      | 4      | 12    | 9       | 3       | E    | 1           | 76607.768    | -0.083                     | 209.6648  |
| 13   | 9      | 5      | 12    | 9       | 4       | E    | 1           | 76621.224    | -0.086                     | 209.1160  |
| 13   | 9      | 5      | 12    | 9       | 4       | A    | 1           | 76627.053    | -0.054                     | 209.6651  |
| 13   | 9      | 4      | 12    | 9       | 3       | A    | 1           | 76627.053    | -0.054                     | 209.6651  |
| 12   | 7      | 5      | 12    | 6       | 6       | E    | 0           | 76637.094    | -0.194                     | 84.1229   |
| 12   | 7      | 5      | 12    | 6       | 6       | A    | 0           | 76644.100    | -0.291                     | 84.1034   |
| 12   | 7      | 6      | 12    | 6       | 7       | A    | 0           | 76661.914    | -0.030                     | 84.1028   |
| 13   | 9      | 4      | 12    | 9       | 3       | A    | 0           | 76664.761    | 0.152                      | 92.9904   |
| 13   | 9      | 5      | 12    | 9       | 4       | A    | 0           | 76664.761    | 0.152                      | 92.9904   |
| 13   | 9      | 4      | 12    | 9       | 3       | E    | 0           | 76664.761    | -0.028                     | 93.0078   |
| 19   | 2      | 17     | 19    | 1       | 18      | A    | 0           | 76675.835    | -0.104                     | 97.3608   |
| 14   | 1      | 13     | 13    | 1       | 12      | A    | 1           | 76696.709    | 0.097                      | 196.3815  |
| 15   | 0      | 15     | 14    | 1       | 14      | A    | 1           | 76726.395    | -0.264                     | 196.9148  |
| 15   | 1      | 15     | 14    | 1       | 14      | A    | 1           | 76730.630    | -0.047                     | 196.9148  |
| 15   | 0      | 15     | 14    | 0       | 14      | A    | 1           | 76734.503    | -0.080                     | 196.9145  |
| 15   | 1      | 15     | 14    | 0       | 14      | A    | 1           | 76738.636    | 0.035                      | 196.9145  |
| 13   | 8      | 6      | 12    | 8       | 5       | E    | 1           | 76748.508    | -0.042                     | 205.7517  |
| 15   | 1      | 15     | 14    | 1       | 14      | E    | 1           | 76749.945    | -0.054                     | 196.3673  |
| 13   | 8      | 5      | 12    | 8       | 4       | A    | 1           | 76752.758    | -0.080                     | 206.3346  |
| 13   | 8      | 6      | 12    | 8       | 5       | A    | 1           | 76752.758    | -0.080                     | 206.3346  |
| 15   | 0      | 15     | 14    | 0       | 14      | E    | 1           | 76754.116    | -0.049                     | 196.3670  |
| 15   | 1      | 15     | 14    | 0       | 14      | E    | 1           | 76758.339    | -0.180                     | 196.3670  |
| 15   | 0      | 15     | 14    | 1       | 14      | A    | 0           | 76762.582    | -0.050                     | 80.0576   |
| 14   | 1      | 13     | 13    | 1       | 12      | E    | 1           | 76765.483    | -0.262                     | 195.8473  |
| 15   | 1      | 15     | 14    | 1       | 14      | A    | 0           | 76766.785    | -0.164                     | 80.0576   |
| 14   | 1      | 13     | 13    | 1       | 12      | E    | 0           | 76769.883    | 0.029                      | 79.5514   |
| 15   | 0      | 15     | 14    | 0       | 14      | A    | 0           | 76770.963    | -0.142                     | 80.0573   |
| 14   | 1      | 13     | 13    | 1       | 12      | A    | 0           | 76772.157    | 0.044                      | 79.5347   |
| 15   | 1      | 15     | 14    | 0       | 14      | E    | 0           | 76774.850    | 0.045                      | 80.0744   |
| 13   | 8      | 5      | 12    | 8       | 4       | A    | 0           | 76789.011    | 0.078                      | 89.6239   |
| 13   | 8      | 6      | 12    | 8       | 5       | A    | 0           | 76789.011    | 0.078                      | 89.6239   |
| 13   | 8      | 5      | 12    | 8       | 4       | E    | 0           | 76789.011    | -0.051                     | 89.6423   |
| 13   | 8      | 6      | 12    | 8       | 5       | E    | 0           | 76789.903    | 0.135                      | 89.6262   |
| 25   | 7      | 19     | 25    | 6       | 20      | E    | 0           | 76841.354    | -0.009                     | 133.4894  |
| 36   | 10     | 26     | 36    | 9       | 27      | E    | 0           | 76841.554    | 0.009                      | 212.0002  |
| 25   | 7      | 19     | 25    | 6       | 20      | A    | 0           | 76872.870    | -0.011                     | 133.4669  |
| 13   | 7      | 6      | 12    | 7       | 5       | E    | 1           | 76901.244    | -0.023                     | 203.2533  |
| 13   | 7      | 7      | 12    | 7       | 6       | E    | 1           | 76938.136    | 0.050                      | 202.7952  |
| 13   | 7      | 7      | 12    | 7       | 6       | A    | 1           | 76938.152    | -0.164                     | 203.4040  |
| 13   | 7      | 6      | 12    | 7       | 5       | A    | 1           | 76939.620    | -0.018                     | 203.4040  |
| 36   | 10     | 26     | 36    | 9       | 27      | A    | 0           | 76947.297    | 0.131                      | 211.9879  |
| 13   | 7      | 7      | 12    | 7       | 6       | A    | 0           | 76972.643    | 0.130                      | 86.6600   |
| 13   | 7      | 7      | 12    | 7       | 6       | E    | 0           | 76974.231    | -0.104                     | 86.6647   |
| 14   | 2      | 13     | 13    | 1       | 12      | A    | 1           | 76985.705    | 0.051                      | 196.3815  |
| 19   | 3      | 17     | 19    | 2       | 18      | A    | 0           | 76987.992    | -0.156                     | 97.3613   |
| 14   | 2      | 13     | 13    | 1       | 12      | E    | 1           | 77071.618    | -0.204                     | 195.8473  |
| 14   | 2      | 13     | 13    | 1       | 12      | E    | 0           | 77074.932    | -0.056                     | 79.5514   |
| 14   | 2      | 13     | 13    | 1       | 12      | A    | 0           | 77078.160    | -0.030                     | 79.5347   |
| 37   | 7      | 30     | 36    | 9       | 27      | E    | 1           | 77111.589    | -0.323                     | 328.2923  |
| 13   | 6      | 7      | 12    | 6       | 6       | E    | 1           | 77178.181    | 0.054                      | 200.6528  |
| 23   | 6      | 18     | 23    | 4       | 19      | E    | 0           | 77191.532    | -0.218                     | 121.1295  |
| 13   | 6      | 8      | 12    | 6       | 7       | A    | 1           | 77220.087    | -0.063                     | 200.8769  |
| 23   | 6      | 18     | 23    | 4       | 19      | A    | 0           | 77229.512    | -0.055                     | 121.1147  |
| 13   | 6      | 8      | 12    | 6       | 7       | E    | 1           | 77242.815    | -0.021                     | 200.2510  |
| 13   | 6      | 8      | 12    | 6       | 7       | A    | 0           | 77251.921    | -0.073                     | 84.1028   |
| 13   | 6      | 7      | 12    | 6       | 6       | E    | 0           | 77267.892    | 0.081                      | 84.1229   |
| 13   | 6      | 8      | 12    | 6       | 7       | E    | 0           | 77267.892    | 0.081                      | 84.1101   |
| 13   | 6      | 7      | 12    | 6       | 6       | A    | 0           | 77282.049    | 0.039                      | 84.1034   |
| 13   | 4      | 10     | 12    | 4       | 9       | A    | 1           | 77328.463    | -0.041                     | 197.0212  |
| 24   | 8      | 16     | 24    | 7       | 17      | E    | 0           | 77330.224    | -0.266                     | 131.2474  |
| 24   | 8      | 16     | 24    | 7       | 17      | A    | 0           | 77345.702    | -0.379                     | 131.2342  |
| 13   | 4      | 10     | 12    | 4       | 9       | A    | 0           | 77375.748    | 0.029                      | 80.1996   |
| 13   | 4      | 10     | 12    | 4       | 9       | E    | 0           | 77377.414    | 0.035                      | 80.2151   |
| 13   | 5      | 9      | 12    | 5       | 8       | A    | 1           | 77553.244    | -0.035                     | 198.7572  |
| 13   | 5      | 9      | 12    | 5       | 8       | A    | 0           | 77586.013    | 0.051                      | 81.9570   |
| 13   | 5      | 9      | 12    | 5       | 8       | E    | 0           | 77616.466    | 0.060                      | 81.9695   |
| 13   | 5      | 8      | 12    | 5       | 7       | E    | 1           | 77681.597    | -0.066                     | 198.4669  |
| 27   | 9      | 19     | 27    | 8       | 19      | E    | 1           | 77685.201    | 0.268                      | 266.1371  |
| 21   | 4      | 18     | 21    | 3       | 19      | A    | 0           | 77697.159    | -0.178                     | 107.5119  |
| 13   | 2      | 11     | 12    | 2       | 10      | A    | 1           | 77751.607    | -0.002                     | 195.2583  |
| 13   | 5      | 9      | 12    | 5       | 8       | E    | 1           | 77791.218    | -0.036                     | 198.1295  |
| 13   | 2      | 11     | 12    | 2       | 10      | E    | 1           | 77853.695    | -0.195                     | 194.7261  |
| 13   | 2      | 11     | 12    | 2       | 10      | E    | 0           | 77865.761    | -0.035                     | 78.4290   |
| 13   | 2      | 11     | 12    | 2       | 10      | A    | 0           | 77869.756    | -0.031                     | 78.4123   |
| 17   | 4      | 14     | 16    | 4       | 12      | E    | 1           | 77954.711    | 0.031                      | 208.7166  |
| 13   | 5      | 8      | 12    | 5       | 7       | E    | 0           | 77982.058    | 0.040                      | 81.9858   |
| 13   | 5      | 8      | 12    | 5       | 7       | A    | 1           | 77992.210    | -0.040                     | 198.7699  |
| 13   | 5      | 8      | 12    | 5       | 7       | A    | 0           | 78010.098    | 0.031                      | 81.9692   |
| 18   | 5      | 13     | 18    | 3       | 15      | E    | 0           | 78010.098    | 0.078                      | 98.3511   |
| 13   | 4      | 10     | 12    | 4       | 9       | E    | 1           | 78055.988    | 0.219                      | 196.4448  |
| 24   | 6      | 19     | 24    | 4       | 20      | A    | 1           | 78078.076    | 0.169                      | 242.6325  |
| 6    | 4      | 2      | 5     | 3       | 2       | E    | 1           | 78160.824    | -0.258                     | 182.7682  |
| 42   | 10     | 32     | 42    | 9       | 33      | A    | 0           | 78169.841    | -0.156                     | 261.6161  |
| 42   | 10     | 32     | 42    | 9       | 33      | E    | 0           | 78193.655    | -0.121                     | 261.6268  |
| 23   | 5      | 19     | 23    | 4       | 20      | E    | 0           | 78212.673    | -0.030                     | 118.6849  |
| 23   | 5      | 19     | 23    | 4       | 20      | A    | 0           | 78226.768    | -0.046                     | 118.6701  |
| 30   | 9      | 21     | 30    | 8       | 22      | E    | 0           | 78365.379    | -0.187                     | 167.6587  |
| 30   | 9      | 21     | 30    | 8       | 22      | A    | 0           | 78427.696    | -0.263                     | 167.6460  |
| 42   | 10     | 32     | 42    | 9       | 33      | A    | 1           | 78427.696    | -0.152                     | 378.2207  |
| 33   | 7      | 26     | 33    | 7       | 27      | E    | 1           | 78568.567    | 0.309                      | 299.4358  |
| 45   | 11     | 34     | 45    | 10      | 35      | A    | 1           | 78679.799    | 0.111                      | 408.4902  |
| 40   | 9      | 31     | 40    | 9       | 32      | E    | 1           | 78712.268    | 0.255                      | 358.0260  |
| 45   | 11     | 34     | 45    | 10      | 35      | A    | 0           | 78739.604    | -0.154                     | 291.9134  |
| 45   | 11     | 34     | 45    | 10      | 35      | E    | 0           | 78744.452    | -0.117                     | 291.9239  |
| 25   | 6      | 20     | 25    | 5       | 21      | A    | 1           | 78807.927    | 0.005                      | 247.5845  |
| 39   | 9      | 30     | 39    | 8       | 31      | E    | 1           | 78837.602    | -0.261                     | 349.6429  |
| 26   | 7      | 20     | 26    | 6       | 21      | E    | 0           | 78971.838    | -0.286                     | 138.6423  |
| 26   | 7      | 20     | 26    | 6       | 21      | A    | 0           | 78999.162    | -0.135                     | 138.6290  |
| 39   | 9      | 30     | 39    | 8       | 31      | A    | 0           | 79234.530    | 0.038                      | 233.3593  |
| 25   | 6      | 20     | 25    | 5       | 21      | E    | 0           | 79242.487    | -0.052                     | 130.8371  |
| 25   | 6      | 20     | 25    | 5       | 21      | A    | 0           | 79259.071    | -0.038                     | 130.8231  |
| 39   | 9      | 30     | 39    | 8       | 31      | E    | 0           | 79267.891    | 0.033                      | 233.3704  |

| $J'$ | $K'_a$ | $K'_c$ | $J''$ | $K''_a$ | $K''_c$ | Sym. | $v_{tCH_3}$ | $\nu_{Obs.}$ | $\nu_{Obs.} - \nu_{Calc.}$ | $E_{low}$ |
|------|--------|--------|-------|---------|---------|------|-------------|--------------|----------------------------|-----------|
| 13   | 4      | 9      | 12    | 4       | 8       | E    | 1           | 79335.297    | -0.252                     | 196.7340  |
| 20   | 5      | 15     | 19    | 6       | 14      | E    | 0           | 79625.228    | -0.207                     | 106.4615  |
| 24   | 4      | 20     | 24    | 3       | 21      | A    | 1           | 79691.357    | 0.100                      | 239.9743  |
| 30   | 9      | 21     | 29    | 10      | 20      | E    | 0           | 79762.063    | 0.079                      | 167.6121  |
| 24   | 4      | 20     | 24    | 3       | 21      | E    | 1           | 79860.433    | -0.144                     | 239.5057  |
| 24   | 4      | 20     | 24    | 3       | 21      | E    | 0           | 79924.761    | -0.000                     | 123.2073  |
| 24   | 4      | 20     | 24    | 3       | 21      | A    | 0           | 79928.418    | 0.034                      | 123.1927  |
| 25   | 8      | 18     | 25    | 7       | 19      | E    | 1           | 79993.375    | 0.061                      | 252.2776  |
| 23   | 8      | 15     | 23    | 7       | 16      | A    | 0           | 80087.811    | -0.345                     | 126.3118  |
| 23   | 8      | 15     | 23    | 7       | 16      | E    | 0           | 80109.328    | -0.235                     | 126.3249  |
| 13   | 4      | 9      | 12    | 4       | 8       | A    | 0           | 80138.164    | -0.023                     | 80.3321   |
| 13   | 4      | 9      | 12    | 4       | 8       | E    | 0           | 80139.474    | 0.125                      | 80.3479   |
| 28   | 7      | 22     | 27    | 8       | 19      | A    | 1           | 80152.895    | 0.032                      | 266.3517  |
| 14   | 3      | 12     | 13    | 3       | 11      | A    | 1           | 80648.602    | -0.026                     | 198.0405  |
| 18   | 2      | 17     | 18    | 0       | 18      | E    | 1           | 80657.142    | 0.381                      | 207.5997  |
| 14   | 3      | 12     | 13    | 3       | 11      | E    | 0           | 80722.024    | -0.009                     | 81.2221   |
| 14   | 3      | 12     | 13    | 3       | 11      | A    | 0           | 80723.715    | 0.004                      | 81.2060   |
| 14   | 3      | 12     | 13    | 3       | 11      | E    | 1           | 80773.202    | -0.091                     | 197.5160  |
| 36   | 8      | 28     | 36    | 7       | 29      | A    | 0           | 80989.597    | 0.078                      | 207.1531  |
| 30   | 6      | 24     | 30    | 6       | 25      | E    | 1           | 81000.242    | 0.543                      | 277.3296  |
| 36   | 8      | 28     | 36    | 7       | 29      | E    | 0           | 81023.292    | 0.142                      | 207.1646  |
| 22   | 8      | 14     | 22    | 7       | 15      | A    | 1           | 81102.118    | 0.282                      | 238.3609  |
| 27   | 7      | 21     | 27    | 6       | 22      | A    | 1           | 81113.550    | 0.185                      | 260.7042  |
| 29   | 8      | 22     | 28    | 9       | 19      | A    | 0           | 81118.610    | 0.178                      | 158.2891  |
| 12   | 3      | 10     | 11    | 2       | 9       | E    | 0           | 81209.807    | -0.263                     | 75.9979   |
| 12   | 3      | 10     | 11    | 2       | 9       | A    | 0           | 81227.969    | -0.202                     | 75.9811   |
| 27   | 5      | 22     | 27    | 5       | 23      | E    | 1           | 81246.922    | 0.088                      | 257.3542  |
| 22   | 3      | 19     | 22    | 2       | 20      | A    | 1           | 81283.284    | 0.042                      | 228.3548  |
| 13   | 3      | 10     | 12    | 3       | 9       | E    | 1           | 81297.825    | -0.172                     | 195.6090  |
| 15   | 1      | 14     | 14    | 2       | 13      | A    | 1           | 81303.999    | 0.013                      | 198.9494  |
| 20   | 3      | 18     | 20    | 2       | 19      | A    | 1           | 81318.377    | -0.303                     | 217.7379  |
| 15   | 1      | 14     | 14    | 2       | 13      | E    | 1           | 81353.739    | -0.166                     | 198.4182  |
| 15   | 1      | 14     | 14    | 2       | 13      | E    | 0           | 81360.268    | -0.046                     | 82.1224   |
| 15   | 1      | 14     | 14    | 2       | 13      | A    | 0           | 81361.540    | 0.035                      | 82.1058   |
| 13   | 3      | 10     | 12    | 3       | 9       | A    | 1           | 81396.573    | -0.065                     | 196.1254  |
| 36   | 8      | 28     | 36    | 7       | 29      | A    | 1           | 81402.704    | -0.102                     | 323.8140  |
| 27   | 5      | 22     | 27    | 5       | 23      | A    | 0           | 81437.303    | 0.253                      | 141.0414  |
| 13   | 3      | 10     | 12    | 3       | 9       | A    | 0           | 81459.716    | -0.259                     | 79.2841   |
| 13   | 3      | 10     | 12    | 3       | 9       | E    | 0           | 81459.716    | 0.312                      | 79.3007   |
| 15   | 2      | 14     | 14    | 2       | 13      | A    | 1           | 81464.882    | -0.048                     | 198.9494  |
| 37   | 8      | 30     | 36    | 9       | 27      | E    | 1           | 81492.462    | -0.613                     | 328.2923  |
| 15   | 2      | 14     | 14    | 2       | 13      | E    | 0           | 81530.957    | -0.013                     | 82.1224   |
| 15   | 2      | 14     | 14    | 2       | 13      | A    | 0           | 81532.720    | -0.013                     | 82.1058   |
| 15   | 1      | 14     | 14    | 1       | 13      | A    | 1           | 81593.000    | -0.027                     | 198.9398  |
| 20   | 2      | 18     | 20    | 1       | 19      | A    | 0           | 81634.996    | -0.110                     | 100.9085  |
| 27   | 7      | 21     | 27    | 6       | 22      | E    | 0           | 81649.533    | -0.099                     | 143.9816  |
| 15   | 1      | 14     | 14    | 1       | 13      | E    | 1           | 81659.925    | -0.057                     | 198.4080  |
| 15   | 1      | 14     | 14    | 1       | 13      | E    | 0           | 81665.458    | 0.011                      | 82.1122   |
| 15   | 1      | 14     | 14    | 1       | 13      | A    | 0           | 81667.603    | 0.021                      | 82.0956   |
| 27   | 7      | 21     | 27    | 6       | 22      | A    | 0           | 81672.897    | -0.047                     | 143.9684  |
| 22   | 3      | 19     | 22    | 2       | 20      | A    | 0           | 81677.843    | -0.016                     | 111.5494  |
| 16   | 0      | 16     | 15    | 1       | 15      | A    | 1           | 81685.855    | -0.015                     | 199.4742  |
| 16   | 1      | 16     | 15    | 1       | 15      | A    | 1           | 81687.868    | -0.025                     | 199.4742  |
| 16   | 0      | 16     | 15    | 0       | 15      | A    | 1           | 81690.020    | 0.132                      | 199.4741  |
| 16   | 1      | 16     | 15    | 0       | 15      | A    | 1           | 81692.103    | 0.192                      | 199.4741  |
| 35   | 10     | 25     | 35    | 9       | 26      | E    | 0           | 81692.133    | -0.150                     | 204.4296  |
| 48   | 12     | 36     | 48    | 11      | 37      | E    | 0           | 81694.414    | 0.244                      | 324.2620  |
| 22   | 3      | 19     | 22    | 2       | 20      | E    | 1           | 81699.303    | -0.361                     | 227.8616  |
| 16   | 0      | 16     | 15    | 1       | 15      | E    | 1           | 81704.773    | -0.104                     | 198.9274  |
| 16   | 1      | 16     | 15    | 1       | 15      | E    | 1           | 81706.994    | -0.092                     | 198.9274  |
| 16   | 0      | 16     | 15    | 0       | 15      | E    | 1           | 81709.143    | -0.088                     | 198.9273  |
| 16   | 1      | 16     | 15    | 0       | 15      | E    | 1           | 81711.238    | -0.203                     | 198.9273  |
| 48   | 12     | 36     | 48    | 11      | 37      | A    | 0           | 81716.122    | 0.273                      | 324.2518  |
| 16   | 0      | 16     | 15    | 1       | 15      | A    | 0           | 81722.981    | -0.330                     | 82.6183   |
| 16   | 0      | 16     | 15    | 1       | 15      | E    | 0           | 81722.981    | 0.245                      | 82.6353   |
| 16   | 1      | 16     | 15    | 1       | 15      | A    | 0           | 81725.197    | -0.297                     | 82.6183   |
| 16   | 1      | 16     | 15    | 1       | 15      | E    | 0           | 81725.197    | 0.287                      | 82.6353   |
| 16   | 0      | 16     | 15    | 0       | 15      | E    | 0           | 81727.233    | 0.197                      | 82.6352   |
| 16   | 1      | 16     | 15    | 0       | 15      | A    | 0           | 81729.511    | -0.300                     | 82.6182   |
| 16   | 1      | 16     | 15    | 0       | 15      | E    | 0           | 81729.511    | 0.301                      | 82.6352   |
| 15   | 2      | 14     | 14    | 1       | 13      | A    | 1           | 81753.919    | -0.053                     | 198.9398  |
| 35   | 10     | 25     | 35    | 9       | 26      | A    | 0           | 81769.943    | 0.089                      | 204.4176  |
| 20   | 3      | 18     | 20    | 2       | 19      | E    | 0           | 81795.712    | -0.134                     | 100.9250  |
| 15   | 2      | 14     | 14    | 1       | 13      | E    | 1           | 81831.725    | -0.087                     | 198.4080  |
| 15   | 2      | 14     | 14    | 1       | 13      | E    | 0           | 81836.038    | -0.066                     | 82.1122   |
| 15   | 2      | 14     | 14    | 1       | 13      | A    | 0           | 81838.799    | -0.010                     | 82.0956   |
| 20   | 3      | 18     | 20    | 2       | 19      | E    | 1           | 81895.774    | 0.274                      | 217.2188  |
| 7    | 4      | 4      | 6     | 3       | 4       | E    | 1           | 81897.936    | 0.166                      | 183.7423  |
| 21   | 5      | 16     | 20    | 6       | 14      | E    | 1           | 82009.961    | 0.522                      | 227.0921  |
| 27   | 5      | 22     | 27    | 4       | 23      | E    | 1           | 82031.972    | -0.158                     | 257.3280  |
| 33   | 7      | 26     | 33    | 6       | 27      | E    | 1           | 82093.323    | 0.045                      | 299.3182  |
| 27   | 5      | 22     | 27    | 4       | 23      | A    | 1           | 82117.138    | -0.003                     | 257.7679  |
| 27   | 5      | 22     | 27    | 4       | 23      | A    | 0           | 82202.268    | 0.128                      | 141.0159  |
| 27   | 5      | 22     | 27    | 4       | 23      | E    | 0           | 82207.544    | 0.120                      | 141.0296  |
| 22   | 8      | 14     | 22    | 7       | 15      | A    | 0           | 82220.579    | -0.319                     | 121.6260  |
| 39   | 13     | 26     | 38    | 14      | 24      | E    | 0           | 82254.082    | 0.326                      | 247.0144  |
| 22   | 8      | 14     | 22    | 7       | 15      | E    | 0           | 82285.828    | -0.340                     | 121.6391  |
| 25   | 8      | 18     | 25    | 7       | 19      | A    | 1           | 82323.840    | 0.291                      | 252.7552  |
| 14   | 12     | 2      | 13    | 12      | 1       | E    | 1           | 82333.331    | -0.015                     | 224.8143  |
| 14   | 12     | 3      | 13    | 12      | 2       | E    | 1           | 82336.136    | -0.049                     | 224.1878  |
| 14   | 13     | 1      | 13    | 13      | 0       | A    | 0           | 82338.063    | 0.160                      | 113.0023  |
| 14   | 13     | 2      | 13    | 13      | 1       | A    | 0           | 82338.063    | 0.160                      | 113.0023  |
| 14   | 13     | 1      | 13    | 13      | 0       | E    | 0           | 82338.063    | -0.061                     | 113.0133  |
| 14   | 13     | 2      | 13    | 13      | 1       | E    | 0           | 82338.063    | -0.061                     | 112.9933  |
| 14   | 12     | 3      | 13    | 12      | 2       | A    | 1           | 82343.332    | -0.028                     | 224.5934  |
| 14   | 12     | 2      | 13    | 12      | 1       | A    | 1           | 82343.332    | -0.028                     | 224.5934  |
| 14   | 12     | 2      | 13    | 12      | 1       | A    | 0           | 82386.454    | 0.130                      | 108.0400  |
| 14   | 12     | 3      | 13    | 12      | 2       | A    | 0           | 82386.454    | 0.130                      | 108.0400  |
| 14   | 12     | 2      | 13    | 12      | 1       | E    | 0           | 82386.454    | -0.140                     | 108.0529  |
| 14   | 12     | 3      | 13    | 12      | 2       | E    | 0           | 82386.454    | -0.140                     | 108.0332  |
| 14   | 11     | 3      | 13    | 11      | 2       | E    | 1           | 82392.780    | -0.066                     | 220.2200  |
| 14   | 11     | 4      | 13    | 11      | 3       | E    | 1           | 82398.929    | -0.007                     | 219.6113  |
| 14   | 11     | 3      | 13    | 11      | 2       | A    | 1           | 82406.254    | -0.039                     | 220.0711  |
| 14   | 11     | 4      | 13    | 11      | 3       | A    | 1           | 82406.254    | -0.039                     | 220.0711  |
| 24   | 5      | 20     | 24    | 4       | 21      | A    | 1           | 82414.172    | 0.086                      | 239.9837  |
| 26   | 8      | 19     | 26    | 7       | 20      | A    | 1           | 82442.807    | 0.261                      | 257.9851  |
| 14   | 11     | 3      | 13    | 11      | 2       | A    | 0           | 82448.485    | 0.178                      | 103.4764  |
| 14   | 11     | 4      | 13    | 11      | 3       | A    | 0           | 82448.485    | 0.178                      | 103.4764  |
| 14   | 11     | 3      | 13    | 11      | 2       | E    | 0           | 82448.489    | -0.143                     | 103.4909  |
| 14   | 11     | 4      | 13    | 11      | 3       | E    | 0           | 82448.489    | -0.143                     | 103.4718  |
| 14   | 10     | 4      | 13    | 10      | 3       | E    | 1           | 82470.873    | -0.043                     | 216.0215  |
| 14   | 10     | 5      | 13    | 10      | 4       | E    | 1           | 82481.618    | -0.040                     | 215.4389  |
| 22   | 4      | 19     | 22    | 3       | 20      | E    | 0           | 82487.051    | -0.151                     | 111.5668  |
| 14   | 10     | 5      | 13    | 10      | 4       | A    | 1           | 82488.807    | -0.033                     | 215.9469  |
| 14   | 10     | 4      | 13    | 10      | 3       | A    | 1           | 82488.807    | -0.033                     | 215.9469  |
| 33   | 7      | 26     | 33    | 6       | 27      | A    | 0           | 82499.458    | 0.229                      | 183.0142  |

| $J'$ | $K'_a$ | $K'_c$ | $J''$ | $K''_a$ | $K''_c$ | Sym. | $v_{tCH_3}$ | $\nu_{Obs.}$ | $\nu_{Obs.} - \nu_{Calc.}$ | $E_{low}$ |
|------|--------|--------|-------|---------|---------|------|-------------|--------------|----------------------------|-----------|
| 22   | 4      | 19     | 22    | 3       | 20      | A    | 0           | 82502.624    | -0.046                     | 111.5514  |
| 7    | 4      | 3      | 6     | 3       | 3       | E    | 0           | 82507.122    | 0.020                      | 67.5516   |
| 24   | 8      | 17     | 24    | 7       | 18      | A    | 1           | 82518.760    | 0.195                      | 247.7243  |
| 14   | 2      | 12     | 13    | 2       | 11      | A    | 1           | 82526.242    | -0.073                     | 197.8518  |
| 14   | 10     | 4      | 13    | 10      | 3       | A    | 0           | 82529.914    | 0.165                      | 99.3120   |
| 14   | 10     | 5      | 13    | 10      | 4       | A    | 0           | 82529.914    | 0.165                      | 99.3120   |
| 14   | 10     | 4      | 13    | 10      | 3       | E    | 0           | 82529.914    | -0.228                     | 99.3280   |
| 14   | 10     | 5      | 13    | 10      | 4       | E    | 0           | 82529.914    | -0.228                     | 99.3096   |
| 22   | 4      | 19     | 22    | 3       | 20      | E    | 1           | 82536.270    | -0.167                     | 227.8636  |
| 22   | 4      | 19     | 22    | 2       | 20      | A    | 0           | 82560.845    | 0.011                      | 111.5494  |
| 14   | 9      | 5      | 13    | 9       | 4       | E    | 1           | 82576.552    | -0.019                     | 212.2202  |
| 14   | 9      | 6      | 13    | 9       | 5       | E    | 1           | 82594.191    | -0.046                     | 211.6718  |
| 14   | 9      | 6      | 13    | 9       | 5       | A    | 1           | 82600.582    | -0.044                     | 212.2211  |
| 14   | 9      | 5      | 13    | 9       | 4       | A    | 1           | 82600.582    | -0.044                     | 212.2211  |
| 14   | 9      | 5      | 13    | 9       | 4       | A    | 0           | 82640.304    | 0.108                      | 95.5477   |
| 14   | 9      | 6      | 13    | 9       | 5       | A    | 0           | 82640.304    | 0.108                      | 95.5477   |
| 14   | 9      | 5      | 13    | 9       | 4       | E    | 0           | 82640.304    | -0.089                     | 95.5651   |
| 14   | 2      | 12     | 13    | 2       | 11      | E    | 1           | 82647.891    | -0.228                     | 197.3230  |
| 14   | 2      | 12     | 13    | 2       | 11      | E    | 0           | 82650.140    | -0.022                     | 81.0266   |
| 14   | 2      | 12     | 13    | 2       | 11      | A    | 0           | 82654.622    | -0.055                     | 81.0099   |
| 8    | 3      | 5      | 7     | 2       | 6       | A    | 0           | 82669.669    | -0.127                     | 67.8067   |
| 29   | 9      | 20     | 29    | 8       | 21      | E    | 0           | 82674.450    | -0.158                     | 161.4141  |
| 24   | 5      | 20     | 24    | 3       | 21      | A    | 1           | 82697.253    | -0.062                     | 239.9743  |
| 29   | 9      | 20     | 29    | 8       | 21      | A    | 0           | 82723.777    | -0.218                     | 161.4017  |
| 14   | 8      | 6      | 13    | 8       | 5       | E    | 1           | 82725.170    | -0.034                     | 208.8181  |
| 14   | 8      | 7      | 13    | 8       | 6       | E    | 1           | 82753.732    | -0.037                     | 208.3117  |
| 14   | 8      | 6      | 13    | 8       | 5       | A    | 1           | 82758.185    | -0.021                     | 208.8948  |
| 14   | 8      | 7      | 13    | 8       | 6       | A    | 1           | 82758.185    | -0.021                     | 208.8948  |
| 21   | 8      | 13     | 21    | 7       | 14      | A    | 1           | 82763.239    | 0.240                      | 233.9048  |
| 14   | 8      | 6      | 13    | 8       | 5       | A    | 0           | 82796.112    | 0.060                      | 92.1853   |
| 14   | 8      | 7      | 13    | 8       | 6       | A    | 0           | 82796.112    | 0.060                      | 92.1853   |
| 14   | 8      | 6      | 13    | 8       | 5       | E    | 0           | 82796.112    | -0.071                     | 92.2037   |
| 14   | 8      | 7      | 13    | 8       | 6       | E    | 0           | 82797.265    | 0.169                      | 92.1876   |
| 7    | 4      | 4      | 6     | 3       | 4       | E    | 0           | 82821.001    | -0.078                     | 67.5320   |
| 24   | 5      | 20     | 24    | 4       | 21      | E    | 0           | 82821.001    | -0.078                     | 123.2175  |
| 24   | 5      | 20     | 24    | 4       | 21      | A    | 0           | 82834.993    | -0.072                     | 123.2029  |
| 26   | 6      | 21     | 26    | 5       | 22      | A    | 1           | 82916.795    | 0.106                      | 252.6046  |
| 31   | 9      | 23     | 30    | 10      | 20      | A    | 0           | 82925.523    | -0.079                     | 173.6476  |
| 23   | 8      | 16     | 23    | 7       | 17      | A    | 1           | 82937.438    | 0.313                      | 242.8958  |
| 14   | 7      | 7      | 13    | 7       | 6       | E    | 1           | 82945.276    | -0.057                     | 205.8184  |
| 27   | 8      | 20     | 27    | 7       | 21      | A    | 1           | 82963.278    | 0.221                      | 263.4099  |
| 14   | 7      | 8      | 13    | 7       | 7       | A    | 1           | 82990.715    | -0.023                     | 205.9704  |
| 14   | 7      | 7      | 13    | 7       | 7       | E    | 1           | 82992.479    | -0.042                     | 205.3616  |
| 14   | 7      | 8      | 13    | 7       | 7       | A    | 1           | 82994.393    | -0.056                     | 205.9705  |
| 14   | 7      | 8      | 13    | 7       | 7       | A    | 0           | 83026.300    | 0.039                      | 89.2275   |
| 14   | 7      | 7      | 13    | 7       | 6       | E    | 0           | 83028.062    | 0.042                      | 89.2467   |
| 14   | 7      | 7      | 13    | 7       | 6       | A    | 0           | 83029.689    | -0.084                     | 89.2276   |
| 30   | 6      | 24     | 30    | 5       | 25      | A    | 0           | 83035.337    | 0.200                      | 160.9621  |
| 30   | 6      | 24     | 30    | 5       | 25      | E    | 0           | 83051.673    | 0.408                      | 160.9751  |
| 14   | 4      | 11     | 13    | 4       | 10      | A    | 1           | 83135.341    | -0.116                     | 199.6006  |
| 30   | 6      | 24     | 30    | 5       | 25      | A    | 1           | 83137.975    | -0.083                     | 277.6836  |
| 24   | 5      | 20     | 24    | 3       | 21      | A    | 0           | 83142.162    | -0.171                     | 123.1927  |
| 16   | 3      | 13     | 15    | 4       | 12      | E    | 0           | 83183.652    | 0.136                      | 88.5366   |
| 14   | 4      | 11     | 13    | 4       | 10      | A    | 0           | 83192.366    | 0.267                      | 82.7806   |
| 14   | 4      | 11     | 13    | 4       | 10      | E    | 0           | 83192.366    | -0.194                     | 82.7961   |
| 26   | 6      | 21     | 26    | 5       | 22      | E    | 1           | 83199.492    | -0.693                     | 252.1615  |
| 25   | 8      | 18     | 25    | 7       | 19      | E    | 0           | 83200.862    | -0.129                     | 136.0435  |
| 25   | 8      | 18     | 25    | 7       | 19      | A    | 0           | 83270.176    | -0.186                     | 136.0311  |
| 26   | 8      | 19     | 26    | 7       | 20      | E    | 0           | 83292.024    | -0.094                     | 141.2766  |
| 14   | 6      | 8      | 13    | 6       | 7       | E    | 1           | 83297.269    | -0.021                     | 203.2272  |
| 14   | 6      | 9      | 13    | 6       | 8       | A    | 1           | 83334.403    | 0.029                      | 203.4527  |
| 26   | 6      | 21     | 26    | 5       | 22      | E    | 0           | 83334.403    | -0.417                     | 135.8626  |
| 23   | 8      | 15     | 23    | 7       | 16      | E    | 1           | 83340.421    | 0.400                      | 242.7855  |
| 26   | 8      | 19     | 26    | 7       | 20      | A    | 0           | 83347.801    | -0.193                     | 141.2641  |
| 26   | 6      | 21     | 26    | 5       | 22      | A    | 0           | 83349.707    | -0.060                     | 135.8487  |
| 14   | 6      | 9      | 13    | 6       | 8       | A    | 0           | 83367.474    | 0.034                      | 86.6797   |
| 14   | 6      | 9      | 13    | 6       | 8       | E    | 1           | 83380.524    | -0.041                     | 202.8276  |
| 14   | 6      | 9      | 13    | 6       | 8       | E    | 0           | 83396.930    | 0.034                      | 86.6875   |
| 15   | 2      | 13     | 14    | 3       | 12      | A    | 0           | 83400.135    | 0.118                      | 83.8986   |
| 15   | 2      | 13     | 14    | 3       | 12      | E    | 0           | 83404.698    | -0.081                     | 83.9147   |
| 14   | 6      | 8      | 13    | 6       | 7       | A    | 1           | 83406.587    | -0.019                     | 203.4543  |
| 14   | 6      | 8      | 13    | 6       | 7       | E    | 0           | 83409.079    | 0.049                      | 86.7002   |
| 14   | 6      | 8      | 13    | 6       | 7       | A    | 0           | 83436.497    | 0.025                      | 86.6813   |
| 15   | 2      | 13     | 14    | 3       | 12      | E    | 1           | 83438.035    | 0.176                      | 200.2104  |
| 15   | 2      | 13     | 14    | 3       | 12      | A    | 1           | 83440.603    | 0.049                      | 200.7306  |
| 24   | 8      | 17     | 24    | 7       | 18      | A    | 0           | 83496.126    | -0.282                     | 130.9976  |
| 14   | 5      | 10     | 13    | 5       | 9       | A    | 1           | 83660.226    | -0.073                     | 201.3441  |
| 14   | 5      | 10     | 13    | 5       | 9       | A    | 0           | 83697.065    | 0.051                      | 84.5449   |
| 14   | 5      | 10     | 13    | 5       | 9       | E    | 0           | 83713.099    | 0.043                      | 84.5585   |
| 13   | 3      | 11     | 12    | 2       | 10      | E    | 0           | 83735.246    | -0.201                     | 78.4290   |
| 14   | 4      | 11     | 13    | 4       | 10      | E    | 1           | 83738.270    | 0.226                      | 199.0484  |
| 13   | 3      | 11     | 12    | 2       | 10      | A    | 0           | 83751.419    | -0.261                     | 78.4123   |
| 27   | 8      | 20     | 27    | 7       | 21      | E    | 0           | 83770.278    | -0.121                     | 146.7051  |
| 23   | 8      | 16     | 23    | 7       | 17      | E    | 0           | 83809.702    | -0.268                     | 126.1789  |
| 46   | 11     | 35     | 46    | 10      | 36      | A    | 0           | 83812.523    | -0.338                     | 301.4557  |
| 27   | 8      | 20     | 27    | 7       | 21      | A    | 0           | 83817.182    | -0.171                     | 146.6927  |
| 46   | 11     | 35     | 46    | 10      | 36      | E    | 0           | 83838.186    | -0.294                     | 301.4655  |
| 21   | 8      | 13     | 21    | 7       | 14      | A    | 0           | 83844.491    | -0.280                     | 117.1700  |
| 23   | 8      | 16     | 23    | 7       | 17      | A    | 0           | 83936.022    | -0.180                     | 126.1668  |
| 21   | 8      | 13     | 21    | 7       | 14      | E    | 0           | 83942.012    | -0.161                     | 117.1834  |
| 28   | 8      | 21     | 28    | 7       | 22      | A    | 1           | 83960.768    | 0.272                      | 269.0253  |
| 14   | 5      | 9      | 13    | 5       | 8       | E    | 1           | 83977.608    | -0.064                     | 201.0581  |
| 20   | 8      | 12     | 20    | 7       | 13      | A    | 1           | 84021.310    | 0.244                      | 229.6725  |
| 14   | 5      | 10     | 13    | 5       | 9       | E    | 1           | 84066.265    | 0.007                      | 200.7243  |
| 26   | 6      | 21     | 26    | 4       | 22      | A    | 1           | 84082.383    | -0.019                     | 252.5657  |
| 46   | 11     | 35     | 46    | 10      | 36      | A    | 1           | 84089.592    | -0.396                     | 418.0155  |
| 21   | 8      | 14     | 21    | 7       | 15      | A    | 1           | 84118.164    | 0.282                      | 233.8553  |
| 37   | 12     | 25     | 36    | 13      | 24      | A    | 1           | 84213.200    | 0.202                      | 343.3487  |
| 5    | 5      | 0      | 4     | 4       | 0       | E    | 1           | 84246.205    | -0.592                     | 183.2137  |
| 49   | 12     | 37     | 49    | 11      | 38      | A    | 1           | 84310.279    | 0.102                      | 451.0338  |
| 40   | 11     | 29     | 40    | 10      | 30      | E    | 0           | 84333.224    | 0.594                      | 246.7279  |
| 22   | 8      | 15     | 22    | 7       | 16      | E    | 0           | 84338.223    | -0.296                     | 121.5532  |
| 28   | 7      | 22     | 28    | 6       | 23      | A    | 1           | 84355.024    | 0.107                      | 266.2115  |
| 18   | 4      | 14     | 17    | 5       | 13      | A    | 1           | 84381.068    | -0.065                     | 213.7168  |
| 49   | 12     | 37     | 49    | 11      | 38      | A    | 0           | 84398.932    | -0.087                     | 334.5025  |
| 49   | 12     | 37     | 49    | 11      | 38      | E    | 0           | 84402.498    | -0.082                     | 334.5121  |
| 14   | 5      | 9      | 13    | 5       | 8       | E    | 0           | 84472.522    | 0.067                      | 84.5870   |
| 14   | 5      | 9      | 13    | 5       | 8       | A    | 1           | 84474.765    | -0.051                     | 201.3714  |
| 14   | 5      | 9      | 13    | 5       | 8       | A    | 0           | 84485.510    | 0.057                      | 84.5713   |
| 22   | 8      | 15     | 22    | 7       | 16      | A    | 0           | 84506.064    | -0.228                     | 121.5413  |
| 26   | 6      | 21     | 26    | 4       | 22      | A    | 0           | 84609.263    | -0.187                     | 135.8067  |
| 28   | 8      | 21     | 28    | 7       | 22      | E    | 0           | 84715.224    | -0.110                     | 152.3248  |
| 20   | 8      | 13     | 20    | 7       | 14      | A    | 1           | 84751.396    | 0.240                      | 229.6461  |
| 28   | 8      | 21     | 28    | 7       | 22      | A    | 0           | 84755.454    | -0.121                     | 152.3124  |
| 28   | 7      | 22     | 28    | 6       | 23      | E    | 0           | 84847.770    | -0.026                     | 149.4946  |
| 28   | 7      | 22     | 28    | 6       | 23      | A    | 0           | 84867.678    | -0.058                     | 149.4816  |

| $J'$ | $K'_a$ | $K'_c$ | $J''$ | $K''_a$ | $K''_c$ | Sym. | $v_{tCH_3}$ | $\nu_{Obs.}$ | $\nu_{Obs.} - \nu_{Calc.}$ | $E_{low}$ |
|------|--------|--------|-------|---------|---------|------|-------------|--------------|----------------------------|-----------|
| 21   | 8      | 14     | 21    | 7       | 15      | E    | 0           | 84937.803    | -0.284                     | 117.1341  |
| 19   | 8      | 11     | 19    | 7       | 12      | A    | 1           | 84980.843    | 0.236                      | 225.6583  |
| 43   | 10     | 33     | 43    | 9       | 34      | A    | 0           | 85062.781    | -0.202                     | 270.4440  |
| 20   | 8      | 12     | 20    | 7       | 13      | A    | 0           | 85076.022    | -0.262                     | 112.9372  |
| 23   | 6      | 17     | 22    | 7       | 16      | A    | 0           | 85096.924    | -0.361                     | 121.5413  |
| 43   | 10     | 33     | 43    | 9       | 34      | E    | 0           | 85100.837    | -0.161                     | 270.4541  |
| 20   | 8      | 13     | 20    | 7       | 14      | E    | 1           | 85100.837    | 0.110                      | 229.0514  |
| 21   | 8      | 14     | 21    | 7       | 15      | A    | 0           | 85135.757    | -0.238                     | 117.1228  |
| 20   | 8      | 12     | 20    | 7       | 13      | E    | 0           | 85179.658    | -0.197                     | 112.9513  |
| 19   | 8      | 12     | 19    | 7       | 13      | A    | 1           | 85355.005    | 0.273                      | 225.6450  |
| 29   | 8      | 22     | 29    | 7       | 23      | A    | 1           | 85490.415    | 0.289                      | 274.8267  |
| 43   | 10     | 33     | 43    | 9       | 34      | A    | 1           | 85542.933    | -0.521                     | 387.0321  |
| 20   | 8      | 13     | 20    | 7       | 14      | E    | 0           | 85568.111    | -0.255                     | 112.9226  |
| 25   | 4      | 21     | 25    | 3       | 22      | E    | 1           | 85689.768    | -0.357                     | 244.2082  |
| 25   | 4      | 21     | 25    | 3       | 22      | E    | 0           | 85729.452    | 0.090                      | 127.9099  |
| 25   | 4      | 21     | 25    | 3       | 22      | A    | 0           | 85736.394    | 0.019                      | 127.8954  |
| 20   | 8      | 13     | 20    | 7       | 14      | A    | 0           | 85770.622    | -0.216                     | 112.9121  |
| 15   | 3      | 13     | 14    | 3       | 12      | A    | 1           | 85860.814    | -0.025                     | 200.7306  |
| 19   | 8      | 12     | 19    | 7       | 13      | E    | 1           | 85892.114    | -0.797                     | 225.0435  |
| 15   | 3      | 13     | 14    | 3       | 12      | E    | 0           | 85941.867    | -0.043                     | 83.9147   |
| 15   | 3      | 13     | 14    | 3       | 12      | A    | 0           | 85943.933    | -0.024                     | 83.8986   |
| 15   | 3      | 13     | 14    | 3       | 12      | E    | 1           | 85969.485    | -0.052                     | 200.2104  |
| 19   | 8      | 11     | 19    | 7       | 12      | A    | 0           | 86017.507    | -0.132                     | 108.9223  |
| 19   | 8      | 11     | 19    | 7       | 12      | E    | 0           | 86099.125    | -0.180                     | 108.9376  |
| 21   | 3      | 19     | 21    | 2       | 20      | A    | 1           | 86122.213    | -0.134                     | 221.4481  |
| 29   | 8      | 22     | 29    | 7       | 23      | E    | 0           | 86185.989    | -0.099                     | 158.1312  |
| 19   | 8      | 12     | 19    | 7       | 13      | E    | 0           | 86193.550    | -0.208                     | 108.9188  |
| 29   | 8      | 22     | 29    | 7       | 23      | A    | 0           | 86220.573    | -0.112                     | 158.1189  |
| 14   | 3      | 12     | 13    | 2       | 11      | A    | 1           | 86304.838    | -0.190                     | 197.8518  |
| 17   | 8      | 9      | 17    | 7       | 10      | A    | 1           | 86304.838    | -0.190                     | 218.2682  |
| 16   | 1      | 15     | 15    | 2       | 14      | A    | 1           | 86350.366    | -0.004                     | 201.6668  |
| 14   | 4      | 10     | 13    | 4       | 9       | E    | 1           | 86366.967    | -0.323                     | 199.3804  |
| 19   | 8      | 12     | 19    | 7       | 13      | A    | 0           | 86372.804    | -0.258                     | 108.9096  |
| 16   | 1      | 15     | 15    | 2       | 14      | E    | 1           | 86404.466    | -0.186                     | 201.1376  |
| 16   | 1      | 15     | 15    | 2       | 14      | E    | 0           | 86412.811    | -0.050                     | 84.8419   |
| 16   | 1      | 15     | 15    | 2       | 14      | A    | 0           | 86414.376    | 0.043                      | 84.8254   |
| 23   | 3      | 20     | 23    | 2       | 21      | A    | 1           | 86423.826    | -0.161                     | 232.5566  |
| 28   | 9      | 19     | 28    | 8       | 20      | E    | 0           | 86428.718    | -0.118                     | 155.4174  |
| 16   | 2      | 15     | 15    | 2       | 14      | A    | 1           | 86438.561    | -0.035                     | 201.6668  |
| 28   | 9      | 19     | 28    | 8       | 20      | E    | 1           | 86455.023    | -0.231                     | 155.4053  |
| 16   | 2      | 15     | 15    | 2       | 14      | E    | 1           | 86499.497    | -0.137                     | 201.1376  |
| 16   | 2      | 15     | 15    | 2       | 14      | E    | 0           | 86506.811    | -0.013                     | 84.8419   |
| 16   | 2      | 15     | 15    | 2       | 14      | A    | 0           | 86508.624    | -0.011                     | 84.8254   |
| 16   | 1      | 15     | 15    | 1       | 14      | A    | 1           | 86511.257    | -0.057                     | 201.6614  |
| 21   | 2      | 19     | 21    | 1       | 20      | E    | 0           | 86529.644    | -0.194                     | 104.6376  |
| 16   | 1      | 15     | 15    | 1       | 14      | E    | 1           | 86576.391    | -0.093                     | 201.1318  |
| 16   | 1      | 15     | 15    | 1       | 14      | E    | 0           | 86583.528    | 0.011                      | 84.8363   |
| 16   | 1      | 15     | 15    | 1       | 14      | A    | 0           | 86585.564    | 0.003                      | 84.8197   |
| 14   | 3      | 12     | 13    | 2       | 11      | E    | 0           | 86591.451    | -0.233                     | 81.0264   |
| 16   | 2      | 15     | 15    | 1       | 14      | A    | 0           | 86599.503    | -0.038                     | 201.6614  |
| 35   | 10     | 25     | 35    | 9       | 26      | E    | 1           | 86616.451    | 0.160                      | 320.7448  |
| 40   | 9      | 31     | 40    | 8       | 32      | E    | 1           | 86624.575    | -0.265                     | 357.7620  |
| 21   | 3      | 19     | 21    | 2       | 20      | E    | 0           | 86630.063    | -0.027                     | 104.6377  |
| 17   | 0      | 17     | 16    | 1       | 16      | A    | 1           | 86643.631    | -0.105                     | 202.1990  |
| 17   | 1      | 17     | 16    | 1       | 16      | A    | 1           | 86644.702    | -0.046                     | 202.1990  |
| 17   | 0      | 17     | 16    | 0       | 16      | A    | 1           | 86645.741    | -0.018                     | 202.1990  |
| 17   | 0      | 17     | 16    | 1       | 16      | E    | 1           | 86662.551    | -0.132                     | 201.6529  |
| 17   | 1      | 17     | 16    | 1       | 16      | E    | 1           | 86663.720    | -0.077                     | 201.6529  |
| 17   | 0      | 17     | 16    | 0       | 16      | E    | 1           | 86664.848    | -0.045                     | 201.6528  |
| 17   | 1      | 17     | 16    | 0       | 16      | E    | 1           | 86665.998    | -0.009                     | 201.6528  |
| 34   | 10     | 24     | 34    | 9       | 25      | E    | 0           | 86672.007    | 0.154                      | 197.0998  |
| 16   | 2      | 15     | 15    | 1       | 14      | E    | 0           | 86677.517    | 0.036                      | 84.8363   |
| 16   | 2      | 15     | 15    | 1       | 14      | A    | 0           | 86679.878    | 0.015                      | 84.8197   |
| 17   | 0      | 17     | 16    | 1       | 16      | E    | 0           | 86681.872    | -0.114                     | 85.3614   |
| 17   | 1      | 17     | 16    | 1       | 16      | E    | 0           | 86683.080    | 0.001                      | 85.3614   |
| 17   | 1      | 17     | 16    | 1       | 16      | A    | 0           | 86683.900    | 0.240                      | 85.3444   |
| 17   | 0      | 17     | 16    | 0       | 16      | E    | 0           | 86683.900    | -0.261                     | 85.3613   |
| 17   | 0      | 17     | 16    | 0       | 16      | A    | 0           | 86684.846    | 0.101                      | 85.3443   |
| 17   | 1      | 17     | 16    | 0       | 16      | A    | 0           | 86686.066    | 0.223                      | 85.3443   |
| 34   | 10     | 24     | 34    | 9       | 25      | A    | 0           | 86744.161    | 0.049                      | 197.0882  |
| 18   | 8      | 10     | 18    | 7       | 11      | A    | 0           | 86746.988    | -0.210                     | 105.1210  |
| 18   | 8      | 10     | 18    | 7       | 11      | E    | 0           | 86791.695    | -0.156                     | 105.1378  |
| 23   | 3      | 20     | 23    | 3       | 21      | A    | 0           | 86833.909    | -0.127                     | 115.7561  |
| 23   | 3      | 20     | 23    | 2       | 21      | E    | 0           | 86851.514    | -0.110                     | 115.7704  |
| 23   | 3      | 20     | 23    | 2       | 21      | A    | 0           | 86865.828    | -0.171                     | 115.7551  |
| 23   | 4      | 20     | 23    | 2       | 21      | A    | 1           | 86910.334    | -0.045                     | 232.5566  |
| 18   | 8      | 11     | 18    | 7       | 12      | A    | 0           | 86919.639    | -0.194                     | 105.1149  |
| 14   | 4      | 10     | 13    | 4       | 9       | A    | 1           | 87031.846    | -0.028                     | 199.8298  |
| 14   | 4      | 10     | 13    | 4       | 9       | A    | 0           | 87038.794    | 0.075                      | 83.0052   |
| 14   | 4      | 10     | 13    | 4       | 9       | E    | 0           | 87040.764    | 0.071                      | 83.0211   |
| 25   | 5      | 21     | 25    | 4       | 22      | A    | 1           | 87158.509    | 0.022                      | 244.6772  |
| 40   | 9      | 31     | 40    | 8       | 32      | A    | 0           | 87196.742    | -0.014                     | 241.4759  |
| 15   | 2      | 13     | 14    | 2       | 12      | A    | 1           | 87219.613    | -0.072                     | 200.6046  |
| 40   | 9      | 31     | 40    | 8       | 32      | E    | 0           | 87237.042    | 0.004                      | 241.4864  |
| 14   | 3      | 11     | 13    | 3       | 10      | E    | 1           | 87285.476    | -0.206                     | 198.3208  |
| 14   | 3      | 11     | 13    | 3       | 10      | A    | 1           | 87303.889    | -0.079                     | 198.8405  |
| 17   | 8      | 9      | 17    | 7       | 10      | A    | 0           | 87320.614    | -0.239                     | 101.5300  |
| 27   | 6      | 22     | 27    | 5       | 23      | A    | 1           | 87323.944    | 0.044                      | 257.7914  |
| 17   | 8      | 9      | 17    | 7       | 10      | E    | 0           | 87333.429    | -0.096                     | 101.5480  |
| 23   | 4      | 20     | 23    | 3       | 21      | E    | 0           | 87342.625    | -0.125                     | 115.7714  |
| 15   | 2      | 13     | 14    | 2       | 12      | E    | 0           | 87346.271    | -0.032                     | 83.7833   |
| 15   | 2      | 13     | 14    | 2       | 12      | E    | 1           | 87349.297    | -0.218                     | 200.0799  |
| 15   | 2      | 13     | 14    | 2       | 12      | A    | 0           | 87350.924    | -0.021                     | 83.7668   |
| 23   | 4      | 20     | 23    | 3       | 21      | A    | 0           | 87359.076    | -0.083                     | 115.7561  |
| 23   | 4      | 20     | 23    | 2       | 21      | E    | 0           | 87374.459    | -0.100                     | 115.7704  |
| 14   | 3      | 11     | 13    | 3       | 10      | E    | 0           | 87390.598    | -0.001                     | 82.0178   |
| 14   | 3      | 11     | 13    | 3       | 10      | A    | 0           | 87392.343    | 0.018                      | 82.0013   |
| 17   | 8      | 10     | 17    | 7       | 11      | A    | 0           | 87399.887    | -0.255                     | 101.5273  |
| 8    | 4      | 5      | 7     | 3       | 4       | E    | 0           | 87541.694    | 0.022                      | 68.9573   |
| 16   | 8      | 9      | 16    | 7       | 10      | E    | 1           | 87541.694    | 0.327                      | 214.2769  |
| 19   | 8      | 11     | 19    | 7       | 12      | E    | 1           | 87585.796    | 0.915                      | 225.4830  |
| 16   | 8      | 9      | 16    | 7       | 10      | E    | 0           | 87722.737    | -0.201                     | 98.1513   |
| 27   | 6      | 22     | 27    | 5       | 23      | E    | 0           | 87734.613    | -0.046                     | 141.0551  |
| 27   | 6      | 22     | 27    | 5       | 23      | A    | 0           | 87748.514    | -0.026                     | 141.0414  |
| 25   | 5      | 21     | 25    | 3       | 22      | E    | 0           | 87756.245    | -0.072                     | 127.9099  |
| 16   | 8      | 8      | 16    | 7       | 9       | E    | 0           | 87770.069    | -0.252                     | 98.1656   |
| 25   | 5      | 21     | 25    | 3       | 22      | A    | 0           | 87771.271    | -0.093                     | 127.8954  |
| 16   | 8      | 8      | 16    | 7       | 9       | A    | 0           | 87777.011    | -0.118                     | 98.1470   |
| 16   | 8      | 9      | 16    | 7       | 10      | A    | 0           | 87811.213    | -0.164                     | 98.1458   |
| 15   | 8      | 8      | 15    | 7       | 9       | E    | 1           | 87906.536    | -0.653                     | 211.1013  |
| 27   | 7      | 21     | 27    | 5       | 22      | A    | 0           | 87984.202    | -0.231                     | 143.7578  |
| 15   | 8      | 8      | 15    | 7       | 9       | E    | 0           | 88077.883    | -0.228                     | 94.9745   |
| 28   | 5      | 23     | 28    | 5       | 24      | A    | 0           | 88207.293    | 0.073                      | 146.4000  |
| 15   | 14     | 1      | 14    | 14      | 0       | A    | 0           | 88214.268    | 0.061                      | 121.1080  |
| 15   | 14     | 2      | 14    | 14      | 1       | A    | 0           | 88214.268    | 0.061                      | 121.1080  |
| 30   | 8      | 23     | 30    | 7       | 24      | E    | 0           | 88215.968    | -0.054                     | 164.1198  |

| $J'$ | $K'_a$ | $K'_c$ | $J''$ | $K''_a$ | $K''_c$ | Sym. | $v_{tCH_3}$ | $\nu_{Obs.}$ | $\nu_{Obs.} - \nu_{Calc.}$ | $E_{low}$ |
|------|--------|--------|-------|---------|---------|------|-------------|--------------|----------------------------|-----------|
| 15   | 13     | 2      | 14    | 13      | 1       | A    | 0           | 88261.729    | 0.136                      | 115.7488  |
| 15   | 13     | 3      | 14    | 13      | 2       | A    | 0           | 88261.729    | 0.136                      | 115.7488  |
| 15   | 13     | 2      | 14    | 13      | 1       | E    | 0           | 88261.729    | -0.132                     | 115.7598  |
| 15   | 13     | 3      | 14    | 13      | 2       | E    | 0           | 88261.729    | -0.132                     | 115.7398  |
| 15   | 12     | 3      | 14    | 12      | 2       | A    | 1           | 88275.467    | -0.064                     | 227.3401  |
| 15   | 12     | 4      | 14    | 12      | 3       | A    | 1           | 88275.467    | -0.064                     | 227.3401  |
| 15   | 12     | 3      | 14    | 12      | 2       | A    | 0           | 88321.178    | 0.176                      | 110.7882  |
| 15   | 12     | 4      | 14    | 12      | 3       | A    | 0           | 88321.178    | 0.176                      | 110.7882  |
| 15   | 12     | 3      | 14    | 12      | 2       | E    | 0           | 88321.178    | -0.149                     | 110.8010  |
| 15   | 12     | 4      | 14    | 12      | 3       | E    | 0           | 88321.178    | -0.149                     | 110.7813  |
| 15   | 11     | 4      | 14    | 11      | 3       | E    | 1           | 88336.014    | -0.053                     | 222.9683  |
| 15   | 11     | 5      | 14    | 11      | 4       | E    | 1           | 88344.310    | -0.155                     | 222.3598  |
| 15   | 11     | 4      | 14    | 11      | 3       | A    | 1           | 88352.781    | -0.015                     | 222.8199  |
| 15   | 11     | 5      | 14    | 11      | 4       | A    | 1           | 88352.781    | -0.015                     | 222.8199  |
| 15   | 11     | 4      | 14    | 11      | 3       | A    | 0           | 88397.300    | 0.146                      | 106.2266  |
| 15   | 11     | 5      | 14    | 11      | 4       | A    | 0           | 88397.300    | 0.146                      | 106.2266  |
| 15   | 11     | 4      | 14    | 11      | 3       | E    | 0           | 88397.300    | -0.117                     | 106.2411  |
| 6    | 3      | 4      | 5     | 1       | 5       | E    | 1           | 88414.191    | 0.243                      | 180.7931  |
| 14   | 8      | 6      | 14    | 7       | 7       | E    | 0           | 88414.191    | 0.022                      | 92.0163   |
| 15   | 10     | 5      | 14    | 10      | 4       | E    | 1           | 88432.189    | 0.023                      | 218.7724  |
| 27   | 6      | 22     | 27    | 4       | 23      | E    | 1           | 88432.189    | 0.057                      | 257.3280  |
| 15   | 10     | 6      | 14    | 10      | 5       | E    | 1           | 88446.188    | -0.075                     | 218.1902  |
| 15   | 10     | 6      | 14    | 10      | 5       | A    | 1           | 88454.287    | -0.026                     | 218.6984  |
| 15   | 10     | 5      | 14    | 10      | 4       | A    | 1           | 88454.287    | -0.026                     | 218.6984  |
| 15   | 10     | 5      | 14    | 10      | 4       | A    | 0           | 88497.458    | 0.093                      | 102.0648  |
| 15   | 10     | 6      | 14    | 10      | 5       | A    | 0           | 88497.458    | 0.093                      | 102.0648  |
| 15   | 10     | 5      | 14    | 10      | 4       | E    | 0           | 88497.458    | -0.158                     | 102.0809  |
| 29   | 7      | 23     | 29    | 6       | 24      | E    | 0           | 88517.294    | -0.005                     | 155.1786  |
| 29   | 7      | 23     | 29    | 6       | 24      | A    | 0           | 88534.347    | -0.071                     | 155.1657  |
| 15   | 9      | 6      | 14    | 9       | 5       | E    | 1           | 88562.398    | -0.048                     | 214.9746  |
| 15   | 9      | 7      | 14    | 9       | 6       | E    | 1           | 88584.951    | -0.114                     | 214.4269  |
| 15   | 9      | 7      | 14    | 9       | 6       | A    | 1           | 88592.062    | -0.010                     | 214.9763  |
| 15   | 9      | 6      | 14    | 9       | 5       | A    | 1           | 88592.062    | -0.010                     | 214.9763  |
| 8    | 4      | 4      | 7     | 3       | 5       | A    | 1           | 88626.404    | 0.149                      | 185.7401  |
| 15   | 9      | 6      | 14    | 9       | 5       | A    | 0           | 88633.593    | 0.070                      | 98.3043   |
| 15   | 9      | 7      | 14    | 9       | 6       | A    | 0           | 88633.593    | 0.070                      | 98.3043   |
| 15   | 9      | 6      | 14    | 9       | 5       | E    | 0           | 88633.593    | -0.144                     | 98.3216   |
| 15   | 9      | 7      | 14    | 9       | 6       | E    | 0           | 88634.584    | 0.130                      | 98.3043   |
| 28   | 5      | 23     | 28    | 4       | 24      | E    | 0           | 88665.334    | 0.063                      | 146.3983  |
| 21   | 4      | 17     | 20    | 5       | 15      | E    | 1           | 88728.933    | 0.007                      | 225.4277  |
| 15   | 8      | 7      | 14    | 8       | 6       | E    | 1           | 88746.174    | -0.039                     | 211.5775  |
| 15   | 8      | 8      | 14    | 8       | 7       | E    | 1           | 88782.259    | -0.092                     | 211.0721  |
| 15   | 8      | 7      | 14    | 8       | 6       | A    | 1           | 88786.796    | -0.083                     | 211.6553  |
| 15   | 8      | 8      | 14    | 8       | 7       | A    | 1           | 88786.796    | -0.083                     | 211.6553  |
| 15   | 8      | 7      | 14    | 8       | 6       | A    | 0           | 88826.332    | -0.076                     | 94.9470   |
| 15   | 8      | 7      | 14    | 8       | 6       | E    | 0           | 88826.332    | -0.028                     | 94.9654   |
| 15   | 8      | 8      | 14    | 8       | 7       | E    | 0           | 88827.577    | 0.062                      | 94.9495   |
| 12   | 8      | 4      | 12    | 7       | 5       | E    | 0           | 88830.205    | 0.105                      | 86.6792   |
| 15   | 4      | 12     | 14    | 4       | 11      | A    | 1           | 88835.352    | -0.037                     | 202.3737  |
| 6    | 5      | 2      | 5     | 1       | 4       | A    | 1           | 88847.337    | -0.108                     | 67.7208   |
| 6    | 5      | 1      | 5     | 4       | 1       | E    | 0           | 88849.216    | -0.147                     | 67.7408   |
| 12   | 8      | 4      | 12    | 7       | 5       | A    | 0           | 88853.747    | 0.070                      | 86.6600   |
| 15   | 4      | 12     | 14    | 4       | 11      | A    | 0           | 88902.541    | -0.151                     | 85.5556   |
| 15   | 4      | 12     | 14    | 4       | 11      | E    | 0           | 88902.541    | 0.226                      | 85.5711   |
| 15   | 7      | 8      | 14    | 7       | 7       | E    | 1           | 89019.679    | -0.107                     | 208.5852  |
| 15   | 7      | 9      | 14    | 7       | 8       | A    | 1           | 89073.597    | 0.008                      | 208.7387  |
| 15   | 7      | 9      | 14    | 7       | 8       | E    | 1           | 89079.330    | -0.028                     | 208.1299  |
| 15   | 7      | 8      | 14    | 7       | 7       | A    | 1           | 89083.066    | -0.047                     | 208.7389  |
| 15   | 7      | 9      | 14    | 7       | 8       | A    | 0           | 89110.181    | 0.018                      | 91.9970   |
| 15   | 7      | 8      | 14    | 7       | 7       | E    | 0           | 89114.729    | 0.004                      | 92.0163   |
| 15   | 7      | 9      | 14    | 7       | 8       | E    | 0           | 89116.426    | -0.006                     | 92.0019   |
| 15   | 7      | 8      | 14    | 7       | 7       | A    | 0           | 89119.185    | 0.004                      | 91.9972   |
| 37   | 8      | 29     | 37    | 7       | 30      | A    | 0           | 89242.589    | 0.125                      | 214.5671  |
| 15   | 4      | 12     | 14    | 4       | 11      | E    | 1           | 89260.758    | 0.180                      | 201.8416  |
| 50   | 12     | 38     | 50    | 11      | 39      | E    | 0           | 89391.743    | -0.547                     | 344.9075  |
| 15   | 6      | 9      | 14    | 6       | 8       | E    | 1           | 89463.303    | -0.074                     | 206.0057  |
| 15   | 6      | 10     | 14    | 6       | 9       | A    | 1           | 89477.934    | -0.094                     | 206.2324  |
| 16   | 2      | 14     | 15    | 3       | 13      | A    | 1           | 89498.129    | -0.067                     | 203.5946  |
| 16   | 2      | 14     | 15    | 3       | 13      | E    | 0           | 89506.172    | 0.177                      | 86.7815   |
| 15   | 6      | 10     | 14    | 6       | 9       | A    | 0           | 89512.567    | 0.081                      | 89.4605   |
| 27   | 9      | 18     | 27    | 8       | 19      | A    | 0           | 89514.206    | -0.193                     | 149.6545  |
| 27   | 9      | 18     | 27    | 8       | 19      | E    | 0           | 89523.476    | -0.136                     | 149.6664  |
| 15   | 6      | 10     | 14    | 6       | 9       | E    | 0           | 89555.777    | 0.028                      | 89.4693   |
| 15   | 6      | 10     | 14    | 6       | 9       | E    | 1           | 89568.484    | -0.039                     | 205.6088  |
| 15   | 6      | 9      | 14    | 6       | 8       | E    | 0           | 89619.009    | 0.060                      | 89.4825   |
| 15   | 6      | 9      | 14    | 6       | 8       | A    | 1           | 89631.883    | -0.049                     | 206.2365  |
| 15   | 3      | 13     | 14    | 2       | 12      | A    | 1           | 89639.872    | -0.098                     | 200.6046  |
| 15   | 6      | 9      | 14    | 6       | 8       | A    | 0           | 89659.771    | 0.055                      | 89.4644   |
| 15   | 5      | 11     | 14    | 5       | 10      | A    | 1           | 89743.362    | -0.037                     | 204.1347  |
| 15   | 5      | 11     | 14    | 5       | 10      | A    | 0           | 89785.807    | 0.042                      | 87.3368   |
| 15   | 5      | 11     | 14    | 5       | 10      | E    | 0           | 89793.769    | 0.044                      | 87.3509   |
| 15   | 3      | 13     | 14    | 2       | 12      | E    | 0           | 89883.248    | -0.185                     | 83.7833   |
| 15   | 3      | 13     | 14    | 2       | 12      | A    | 0           | 89894.772    | -0.113                     | 83.7668   |
| 31   | 6      | 25     | 31    | 5       | 26      | A    | 0           | 90261.917    | 0.147                      | 167.0036  |
| 31   | 6      | 25     | 31    | 5       | 26      | A    | 1           | 90265.418    | -0.103                     | 283.7167  |
| 31   | 6      | 25     | 31    | 5       | 26      | E    | 0           | 90273.260    | 0.189                      | 167.0163  |
| 15   | 5      | 11     | 14    | 5       | 10      | E    | 1           | 90357.252    | 0.106                      | 203.5285  |
| 34   | 7      | 27     | 34    | 6       | 28      | A    | 0           | 90415.844    | 0.167                      | 189.7367  |
| 15   | 5      | 10     | 14    | 5       | 9       | E    | 1           | 90417.753    | -0.109                     | 203.8593  |
| 34   | 7      | 27     | 34    | 6       | 28      | E    | 0           | 90439.202    | 0.215                      | 189.7485  |
| 47   | 11     | 36     | 47    | 10      | 37      | A    | 0           | 90755.734    | -0.571                     | 311.1346  |
| 47   | 11     | 36     | 47    | 10      | 37      | E    | 0           | 90797.934    | -0.502                     | 311.1437  |
| 31   | 8      | 24     | 31    | 7       | 25      | E    | 0           | 90809.968    | -0.040                     | 170.2865  |
| 31   | 8      | 24     | 31    | 7       | 25      | A    | 0           | 90835.004    | 0.012                      | 170.2745  |
| 22   | 2      | 20     | 22    | 1       | 21      | A    | 1           | 90876.200    | -0.192                     | 225.3235  |
| 16   | 3      | 14     | 15    | 3       | 13      | A    | 1           | 90995.014    | -0.079                     | 203.5946  |
| 16   | 3      | 14     | 15    | 3       | 13      | E    | 0           | 91082.866    | -0.018                     | 86.7815   |
| 16   | 3      | 14     | 15    | 3       | 13      | A    | 0           | 91085.220    | -0.024                     | 86.7654   |
| 16   | 3      | 14     | 15    | 3       | 13      | E    | 1           | 91097.240    | -0.137                     | 203.0780  |
| 15   | 5      | 10     | 14    | 5       | 9       | E    | 0           | 91139.273    | 0.025                      | 87.4047   |
| 15   | 5      | 10     | 14    | 5       | 9       | A    | 1           | 91142.140    | -0.094                     | 204.1892  |
| 15   | 5      | 10     | 14    | 5       | 9       | A    | 0           | 91143.531    | 0.075                      | 87.3894   |
| 29   | 7      | 23     | 29    | 5       | 24      | E    | 0           | 91194.781    | -0.096                     | 155.0893  |
| 22   | 5      | 17     | 21    | 6       | 15      | E    | 1           | 91225.176    | 0.214                      | 231.3898  |
| 26   | 4      | 22     | 26    | 3       | 23      | E    | 0           | 91283.840    | 0.010                      | 132.7758  |
| 26   | 4      | 22     | 26    | 3       | 23      | A    | 0           | 91293.770    | 0.004                      | 132.7615  |
| 33   | 10     | 23     | 33    | 9       | 24      | E    | 0           | 91345.032    | 0.153                      | 190.0190  |
| 17   | 2      | 16     | 16    | 2       | 15      | A    | 1           | 91403.196    | -0.045                     | 204.5501  |
| 33   | 10     | 23     | 33    | 9       | 24      | A    | 0           | 91404.316    | 0.223                      | 190.0077  |
| 22   | 2      | 20     | 22    | 1       | 21      | E    | 0           | 91411.169    | 0.242                      | 108.5157  |
| 17   | 1      | 16     | 16    | 2       | 15      | E    | 1           | 91412.594    | 0.021                      | 204.0229  |
| 17   | 1      | 16     | 16    | 2       | 15      | E    | 0           | 91422.265    | 0.019                      | 87.7275   |
| 17   | 1      | 16     | 16    | 2       | 15      | A    | 0           | 91423.931    | 0.044                      | 87.7111   |
| 22   | 2      | 20     | 22    | 1       | 21      | A    | 0           | 91430.806    | -0.135                     | 108.4996  |
| 17   | 1      | 16     | 16    | 1       | 15      | A    | 1           | 91443.683    | -0.057                     | 204.5471  |
| 17   | 2      | 16     | 16    | 2       | 15      | E    | 1           | 91464.196    | -0.411                     | 204.0229  |



| $J'$ | $K'_a$ | $K'_c$ | $J''$ | $K''_a$ | $K''_c$ | Sym. | $v_{tCH_3}$ | $\nu_{Obs.}$ | $\nu_{Obs.} - \nu_{Calc.}$ | $E_{low}$ |
|------|--------|--------|-------|---------|---------|------|-------------|--------------|----------------------------|-----------|
| 35   | 8      | 28     | 34    | 9       | 25      | E    | 1           | 91464.196    | -0.411                     | 313.4461  |
| 17   | 2      | 16     | 16    | 2       | 15      | E    | 0           | 91473.263    | -0.039                     | 87.7275   |
| 17   | 2      | 16     | 16    | 2       | 15      | A    | 0           | 91475.113    | -0.026                     | 87.7111   |
| 17   | 2      | 16     | 16    | 1       | 15      | A    | 1           | 91491.442    | -0.025                     | 204.5471  |
| 17   | 1      | 16     | 16    | 1       | 15      | E    | 1           | 91507.429    | -0.105                     | 204.0197  |
| 17   | 1      | 16     | 16    | 1       | 15      | E    | 0           | 91516.190    | -0.020                     | 87.7244   |
| 17   | 1      | 16     | 16    | 1       | 15      | A    | 0           | 91518.198    | 0.008                      | 87.7079   |
| 17   | 2      | 16     | 16    | 1       | 15      | E    | 0           | 91567.234    | -0.032                     | 87.7244   |
| 17   | 2      | 16     | 16    | 1       | 15      | A    | 0           | 91569.324    | -0.118                     | 87.7079   |
| 18   | 0      | 18     | 17    | 0       | 17      | A    | 1           | 91601.657    | -0.021                     | 205.0892  |
| 18   | 1      | 18     | 17    | 1       | 17      | A    | 1           | 91601.657    | -0.021                     | 205.0892  |
| 18   | 1      | 18     | 17    | 1       | 17      | E    | 1           | 91620.502    | -0.099                     | 204.5436  |
| 18   | 0      | 18     | 17    | 0       | 17      | E    | 1           | 91620.502    | -0.099                     | 204.5436  |
| 18   | 1      | 18     | 17    | 1       | 17      | A    | 0           | 91641.678    | 0.043                      | 88.2358   |
| 18   | 0      | 18     | 17    | 0       | 17      | E    | 0           | 91641.678    | 0.073                      | 88.2528   |
| 17   | 3      | 14     | 16    | 4       | 13      | E    | 0           | 91856.307    | 0.287                      | 91.6886   |
| 44   | 12     | 32     | 44    | 11      | 33      | A    | 0           | 91891.805    | 1.299                      | 285.0467  |
| 16   | 2      | 14     | 15    | 2       | 13      | A    | 1           | 91918.456    | -0.026                     | 203.5139  |
| 26   | 9      | 17     | 26    | 8       | 18      | A    | 0           | 91932.492    | -0.172                     | 144.1436  |
| 24   | 3      | 21     | 24    | 3       | 22      | A    | 0           | 91935.207    | -0.104                     | 120.1261  |
| 24   | 3      | 21     | 24    | 2       | 22      | E    | 0           | 91936.496    | -0.014                     | 120.1407  |
| 24   | 3      | 21     | 24    | 2       | 22      | A    | 0           | 91952.709    | -0.001                     | 120.1255  |
| 28   | 6      | 23     | 28    | 5       | 24      | A    | 1           | 91956.869    | 0.071                      | 263.1442  |
| 26   | 9      | 17     | 26    | 8       | 18      | E    | 0           | 91986.411    | -0.095                     | 144.1555  |
| 26   | 5      | 22     | 26    | 4       | 23      | A    | 1           | 91996.737    | 0.033                      | 249.5359  |
| 16   | 2      | 14     | 15    | 2       | 13      | E    | 0           | 92043.104    | -0.021                     | 86.6968   |
| 16   | 2      | 14     | 15    | 2       | 13      | A    | 0           | 92047.674    | 0.066                      | 86.6805   |
| 16   | 2      | 14     | 15    | 2       | 13      | E    | 1           | 92047.675    | -0.382                     | 202.9935  |
| 26   | 5      | 22     | 26    | 3       | 23      | A    | 1           | 92089.181    | 0.233                      | 249.5328  |
| 30   | 7      | 24     | 30    | 6       | 25      | A    | 1           | 92160.946    | 0.093                      | 277.7356  |
| 24   | 4      | 21     | 24    | 3       | 22      | E    | 0           | 92224.952    | -0.152                     | 120.1412  |
| 24   | 4      | 21     | 24    | 3       | 22      | A    | 0           | 92242.386    | -0.193                     | 120.1261  |
| 24   | 4      | 21     | 24    | 2       | 22      | A    | 0           | 92259.879    | -0.100                     | 120.1255  |
| 24   | 4      | 21     | 24    | 3       | 22      | E    | 1           | 92296.335    | -0.708                     | 236.4374  |
| 28   | 6      | 23     | 28    | 5       | 24      | E    | 1           | 92308.428    | -0.643                     | 262.7127  |
| 28   | 6      | 23     | 28    | 5       | 24      | E    | 0           | 92368.975    | 0.012                      | 146.4135  |
| 28   | 6      | 23     | 28    | 4       | 24      | A    | 1           | 92376.104    | 0.381                      | 263.1392  |
| 28   | 6      | 23     | 28    | 5       | 24      | A    | 0           | 92382.273    | -0.036                     | 146.4000  |
| 21   | 5      | 16     | 20    | 6       | 15      | A    | 1           | 92412.373    | -0.157                     | 227.2237  |
| 26   | 5      | 22     | 26    | 4       | 23      | E    | 0           | 92437.499    | -0.140                     | 132.7792  |
| 26   | 5      | 22     | 26    | 4       | 23      | A    | 0           | 92452.321    | -0.091                     | 132.7649  |
| 30   | 7      | 24     | 30    | 6       | 25      | E    | 0           | 92553.254    | -0.196                     | 132.7615  |
| 30   | 7      | 24     | 30    | 6       | 25      | A    | 0           | 92592.247    | 0.008                      | 161.0313  |
| 25   | 9      | 16     | 25    | 8       | 17      | A    | 0           | 92607.172    | 0.023                      | 161.0186  |
| 27   | 9      | 19     | 27    | 8       | 20      | A    | 1           | 92608.958    | 0.476                      | 255.5615  |
| 30   | 9      | 22     | 30    | 8       | 23      | E    | 0           | 92775.788    | 0.388                      | 266.1772  |
| 28   | 6      | 23     | 28    | 4       | 24      | E    | 0           | 92813.749    | 0.004                      | 167.0624  |
| 28   | 6      | 23     | 28    | 4       | 24      | A    | 0           | 92824.021    | 0.030                      | 146.3983  |
| 29   | 9      | 21     | 29    | 8       | 22      | E    | 0           | 92839.435    | -0.092                     | 146.3848  |
| 15   | 3      | 12     | 14    | 3       | 11      | A    | 1           | 92856.773    | -0.009                     | 161.0061  |
| 30   | 9      | 22     | 30    | 8       | 23      | A    | 0           | 92872.815    | -0.050                     | 201.7526  |
| 15   | 3      | 12     | 14    | 3       | 11      | E    | 1           | 92873.730    | 0.056                      | 167.0512  |
| 29   | 9      | 21     | 29    | 8       | 22      | A    | 0           | 92921.196    | -0.225                     | 201.2323  |
| 15   | 3      | 12     | 14    | 3       | 11      | E    | 0           | 92929.816    | -0.090                     | 160.9949  |
| 15   | 3      | 12     | 14    | 3       | 11      | A    | 0           | 92985.813    | -0.005                     | 84.9329   |
| 15   | 3      | 12     | 14    | 3       | 11      | A    | 0           | 92988.914    | 0.001                      | 84.9164   |
| 26   | 9      | 18     | 26    | 8       | 19      | E    | 1           | 93107.489    | -0.800                     | 260.1992  |
| 31   | 9      | 23     | 31    | 8       | 24      | E    | 0           | 93162.818    | -0.070                     | 173.3156  |
| 28   | 9      | 20     | 28    | 8       | 21      | E    | 0           | 93198.861    | -0.017                     | 155.1506  |
| 31   | 9      | 23     | 31    | 8       | 24      | A    | 0           | 93213.708    | 0.027                      | 173.3044  |
| 44   | 10     | 34     | 44    | 9       | 35      | A    | 0           | 93224.090    | -0.288                     | 279.4076  |
| 44   | 10     | 34     | 44    | 9       | 35      | E    | 0           | 93270.776    | -0.271                     | 279.4171  |
| 28   | 9      | 20     | 28    | 8       | 21      | A    | 0           | 93292.915    | -0.022                     | 155.1396  |
| 15   | 4      | 11     | 14    | 4       | 10      | E    | 1           | 93376.125    | -0.273                     | 202.2613  |
| 16   | 3      | 14     | 15    | 2       | 13      | A    | 1           | 93415.444    | 0.065                      | 203.5139  |
| 32   | 8      | 25     | 32    | 7       | 26      | A    | 1           | 93424.452    | 0.235                      | 293.3048  |
| 16   | 3      | 14     | 15    | 2       | 13      | E    | 0           | 93619.897    | -0.117                     | 86.6968   |
| 16   | 3      | 14     | 15    | 2       | 13      | A    | 0           | 93628.977    | -0.207                     | 86.6805   |
| 16   | 3      | 14     | 15    | 2       | 13      | E    | 1           | 93628.981    | -0.074                     | 202.9935  |
| 27   | 9      | 19     | 27    | 8       | 20      | E    | 0           | 93745.189    | -0.108                     | 149.4994  |
| 25   | 9      | 16     | 25    | 8       | 17      | A    | 0           | 93812.366    | -0.138                     | 138.8657  |
| 44   | 10     | 34     | 44    | 9       | 35      | A    | 1           | 93827.885    | -0.525                     | 395.9793  |
| 15   | 4      | 11     | 14    | 4       | 10      | A    | 1           | 93833.330    | 0.006                      | 202.7329  |
| 15   | 4      | 11     | 14    | 4       | 10      | A    | 0           | 93856.307    | 0.035                      | 85.9085   |
| 15   | 4      | 11     | 14    | 4       | 10      | E    | 0           | 93858.129    | 0.058                      | 85.9245   |
| 27   | 9      | 19     | 27    | 8       | 20      | A    | 0           | 93872.032    | -0.050                     | 149.4885  |
| 25   | 9      | 16     | 25    | 8       | 17      | E    | 0           | 93903.785    | -0.009                     | 138.8779  |
| 32   | 8      | 25     | 32    | 7       | 26      | E    | 0           | 93945.064    | 0.051                      | 176.6276  |
| 32   | 8      | 25     | 32    | 7       | 26      | A    | 0           | 93965.997    | 0.065                      | 176.6157  |
| 32   | 9      | 24     | 32    | 8       | 25      | E    | 0           | 93985.689    | 0.053                      | 179.7612  |
| 32   | 9      | 24     | 32    | 8       | 25      | A    | 0           | 94029.258    | 0.004                      | 179.7500  |
| 16   | 15     | 2      | 15    | 15      | 1       | E    | 1           | 94031.707    | -0.072                     | 246.0171  |
| 16   | 15     | 1      | 15    | 15      | 0       | E    | 1           | 94033.223    | -0.042                     | 246.6452  |
| 7    | 5      | 2      | 6     | 4       | 3       | A    | 1           | 94044.459    | 0.247                      | 185.7289  |
| 7    | 5      | 3      | 6     | 4       | 3       | E    | 1           | 94053.324    | 0.004                      | 185.0928  |
| 16   | 14     | 3      | 15    | 14      | 2       | E    | 1           | 94078.245    | -0.083                     | 240.2346  |
| 16   | 14     | 2      | 15    | 14      | 1       | E    | 1           | 94078.245    | -0.083                     | 240.8708  |
| 16   | 14     | 2      | 15    | 14      | 1       | A    | 1           | 94086.697    | -0.061                     | 240.5168  |
| 16   | 14     | 3      | 15    | 14      | 2       | A    | 1           | 94086.697    | -0.061                     | 240.5168  |
| 16   | 15     | 1      | 15    | 15      | 0       | A    | 0           | 94090.273    | 0.081                      | 129.8065  |
| 16   | 15     | 2      | 15    | 15      | 1       | A    | 0           | 94090.273    | 0.081                      | 129.8065  |
| 16   | 15     | 1      | 15    | 15      | 0       | E    | 0           | 94090.273    | -0.131                     | 129.8133  |
| 16   | 15     | 2      | 15    | 15      | 1       | E    | 0           | 94090.273    | -0.131                     | 129.7936  |
| 24   | 9      | 15     | 24    | 8       | 16      | A    | 1           | 94102.999    | 0.348                      | 250.5102  |
| 16   | 13     | 3      | 15    | 13      | 2       | E    | 1           | 94133.278    | -0.094                     | 235.4904  |
| 16   | 13     | 4      | 15    | 13      | 3       | E    | 1           | 94136.159    | -0.078                     | 234.8548  |
| 16   | 14     | 2      | 15    | 14      | 1       | A    | 0           | 94136.894    | 0.143                      | 124.0505  |
| 16   | 14     | 3      | 15    | 14      | 2       | A    | 0           | 94136.894    | 0.143                      | 124.0505  |
| 16   | 14     | 2      | 15    | 14      | 1       | E    | 0           | 94136.894    | -0.121                     | 124.0594  |
| 16   | 14     | 3      | 15    | 14      | 2       | E    | 0           | 94136.894    | -0.121                     | 124.0394  |
| 16   | 13     | 4      | 15    | 13      | 3       | A    | 1           | 94145.072    | -0.034                     | 235.2013  |
| 16   | 13     | 3      | 15    | 13      | 2       | A    | 1           | 94145.072    | -0.034                     | 235.2013  |
| 38   | 8      | 30     | 38    | 8       | 31      | E    | 1           | 94158.608    | 0.282                      | 338.5217  |
| 21   | 5      | 16     | 20    | 6       | 15      | E    | 1           | 94160.865    | -0.125                     | 226.6868  |
| 16   | 13     | 3      | 15    | 13      | 2       | A    | 0           | 94194.249    | 0.157                      | 118.6929  |
| 16   | 13     | 4      | 15    | 13      | 3       | A    | 0           | 94194.249    | 0.157                      | 118.6929  |
| 16   | 13     | 3      | 15    | 13      | 2       | E    | 0           | 94194.249    | -0.165                     | 118.7039  |
| 16   | 13     | 4      | 15    | 13      | 3       | E    | 0           | 94194.249    | -0.165                     | 118.6839  |
| 16   | 12     | 4      | 15    | 12      | 3       | E    | 1           | 94202.510    | -0.113                     | 230.5047  |
| 16   | 12     | 5      | 15    | 12      | 4       | E    | 1           | 94208.950    | 0.023                      | 229.8785  |
| 16   | 12     | 4      | 15    | 12      | 3       | A    | 1           | 94218.159    | -0.058                     | 230.2846  |
| 16   | 12     | 5      | 15    | 12      | 4       | A    | 1           | 94218.159    | -0.058                     | 230.2846  |
| 25   | 9      | 17     | 25    | 8       | 18      | A    | 1           | 94237.483    | 0.418                      | 255.5013  |
| 29   | 5      | 24     | 29    | 5       | 25      | A    | 1           | 94260.741    | 0.080                      | 268.6621  |
| 16   | 12     | 4      | 15    | 12      | 3       | E    | 0           | 94266.286    | -0.083                     | 113.7471  |
| 16   | 11     | 5      | 15    | 11      | 4       | E    | 1           | 94291.332    | -0.071                     | 225.9149  |

| $J'$ | $K'_a$ | $K'_c$ | $J''$ | $K''_a$ | $K''_c$ | Sym. | $v_{tCH_3}$ | $\nu_{Obs.}$ | $\nu_{Obs.} - \nu_{Calc.}$ | $E_{low}$ |
|------|--------|--------|-------|---------|---------|------|-------------|--------------|----------------------------|-----------|
| 16   | 11     | 6      | 15    | 11      | 5       | E    | 1           | 94302.435    | -0.072                     | 225.3067  |
| 16   | 11     | 5      | 15    | 11      | 4       | A    | 1           | 94311.850    | -0.056                     | 225.7670  |
| 16   | 11     | 6      | 15    | 11      | 5       | A    | 1           | 94311.850    | -0.056                     | 225.7670  |
| 16   | 11     | 5      | 15    | 11      | 4       | A    | 0           | 94358.632    | 0.162                      | 109.1752  |
| 16   | 11     | 6      | 15    | 11      | 5       | A    | 0           | 94358.632    | 0.162                      | 109.1752  |
| 16   | 11     | 5      | 15    | 11      | 4       | E    | 0           | 94358.632    | -0.305                     | 109.1898  |
| 16   | 11     | 6      | 15    | 11      | 5       | E    | 0           | 94358.632    | -0.305                     | 109.1706  |
| 25   | 9      | 17     | 25    | 8       | 18      | E    | 1           | 94385.616    | -0.677                     | 254.9459  |
| 16   | 10     | 6      | 15    | 10      | 5       | E    | 1           | 94408.182    | -0.034                     | 221.7222  |
| 26   | 9      | 18     | 26    | 8       | 19      | E    | 0           | 94414.859    | -0.074                     | 144.0549  |
| 16   | 4      | 13     | 15    | 4       | 12      | A    | 1           | 94418.679    | -0.028                     | 205.3369  |
| 16   | 10     | 7      | 15    | 10      | 6       | E    | 1           | 94426.181    | -0.048                     | 221.1405  |
| 16   | 10     | 7      | 15    | 10      | 6       | A    | 1           | 94435.145    | -0.071                     | 221.6489  |
| 16   | 10     | 6      | 15    | 10      | 5       | A    | 1           | 94435.145    | -0.071                     | 221.6489  |
| 16   | 10     | 6      | 15    | 10      | 5       | A    | 0           | 94480.349    | 0.103                      | 105.0168  |
| 16   | 10     | 7      | 15    | 10      | 6       | A    | 0           | 94480.349    | 0.103                      | 105.0168  |
| 16   | 10     | 6      | 15    | 10      | 5       | E    | 0           | 94480.349    | -0.175                     | 105.0329  |
| 16   | 4      | 13     | 15    | 4       | 12      | E    | 0           | 94496.370    | -0.027                     | 88.5366   |
| 16   | 4      | 13     | 15    | 4       | 12      | A    | 0           | 94497.532    | 0.062                      | 88.5211   |
| 29   | 5      | 24     | 29    | 4       | 25      | A    | 1           | 94506.344    | 0.025                      | 268.6539  |
| 16   | 9      | 7      | 15    | 9       | 6       | E    | 1           | 94566.561    | -0.328                     | 217.9288  |
| 26   | 9      | 18     | 26    | 8       | 19      | A    | 0           | 94583.363    | -0.077                     | 144.0443  |
| 16   | 9      | 8      | 15    | 9       | 7       | E    | 1           | 94595.255    | -0.030                     | 217.3818  |
| 16   | 9      | 8      | 15    | 9       | 7       | A    | 1           | 94602.944    | 0.003                      | 217.9314  |
| 16   | 9      | 7      | 15    | 9       | 6       | A    | 1           | 94602.944    | 0.003                      | 217.9314  |
| 16   | 9      | 7      | 15    | 9       | 6       | A    | 0           | 94646.145    | 0.084                      | 101.2608  |
| 16   | 9      | 8      | 15    | 9       | 7       | A    | 0           | 94646.145    | 0.084                      | 101.2608  |
| 16   | 9      | 7      | 15    | 9       | 6       | E    | 0           | 94646.145    | -0.148                     | 101.2781  |
| 16   | 9      | 8      | 15    | 9       | 7       | E    | 0           | 94647.320    | 0.125                      | 101.2609  |
| 7    | 5      | 3      | 6     | 4       | 3       | E    | 0           | 94648.922    | -0.166                     | 68.9131   |
| 16   | 4      | 13     | 15    | 4       | 12      | E    | 1           | 94708.308    | 0.097                      | 204.8191  |
| 26   | 9      | 17     | 26    | 8       | 18      | E    | 1           | 94718.597    | 0.264                      | 260.6624  |
| 29   | 5      | 24     | 29    | 4       | 25      | E    | 0           | 94761.963    | 0.094                      | 151.9284  |
| 29   | 5      | 24     | 29    | 4       | 25      | A    | 0           | 94765.188    | 0.066                      | 151.9150  |
| 16   | 8      | 8      | 15    | 8       | 7       | E    | 1           | 94791.414    | -0.029                     | 214.5377  |
| 16   | 8      | 9      | 15    | 8       | 8       | E    | 1           | 94836.421    | -0.037                     | 214.0535  |
| 16   | 8      | 9      | 15    | 8       | 8       | A    | 1           | 94840.427    | -0.046                     | 214.6169  |
| 16   | 8      | 8      | 15    | 8       | 7       | A    | 1           | 94841.476    | -0.071                     | 214.6169  |
| 16   | 8      | 8      | 15    | 8       | 7       | A    | 0           | 94881.871    | -0.218                     | 97.9100   |
| 16   | 8      | 8      | 15    | 8       | 7       | E    | 0           | 94881.871    | 0.157                      | 97.9284   |
| 16   | 8      | 9      | 15    | 8       | 8       | E    | 0           | 94883.247    | 0.095                      | 97.9124   |
| 21   | 1      | 20     | 21    | 0       | 21      | E    | 0           | 94890.470    | -0.277                     | 101.4724  |
| 21   | 2      | 20     | 21    | 1       | 21      | E    | 0           | 94894.317    | -0.389                     | 101.4724  |
| 21   | 1      | 20     | 21    | 0       | 21      | A    | 0           | 94914.343    | -0.294                     | 101.4554  |
| 21   | 2      | 20     | 21    | 1       | 21      | A    | 0           | 94918.398    | -0.217                     | 101.4554  |
| 45   | 10     | 35     | 45    | 10      | 36      | E    | 1           | 94941.488    | -0.376                     | 404.9973  |
| 24   | 9      | 16     | 24    | 8       | 17      | A    | 1           | 95013.927    | 0.471                      | 250.4769  |
| 41   | 9      | 32     | 41    | 8       | 33      | E    | 1           | 95109.609    | -0.190                     | 366.0210  |
| 16   | 7      | 9      | 15    | 7       | 8       | E    | 1           | 95127.894    | -0.049                     | 211.5545  |
| 25   | 9      | 17     | 25    | 8       | 18      | E    | 0           | 95152.317    | -0.083                     | 138.8188  |
| 16   | 7      | 10     | 15    | 7       | 9       | A    | 1           | 95188.501    | -0.057                     | 211.7099  |
| 16   | 7      | 10     | 15    | 7       | 9       | E    | 1           | 95202.275    | -0.005                     | 211.1013  |
| 17   | 2      | 15     | 16    | 3       | 14      | E    | 0           | 95208.969    | -0.053                     | 89.8197   |
| 16   | 7      | 9      | 15    | 7       | 8       | A    | 1           | 95211.157    | -0.036                     | 211.7104  |
| 16   | 7      | 10     | 15    | 7       | 9       | A    | 0           | 95226.002    | 0.060                      | 94.9694   |
| 16   | 7      | 9      | 15    | 7       | 8       | E    | 0           | 95237.196    | -0.000                     | 94.9888   |
| 16   | 7      | 10     | 15    | 7       | 9       | E    | 0           | 95238.477    | 0.152                      | 94.9745   |
| 16   | 7      | 9      | 15    | 7       | 8       | A    | 0           | 95247.466    | 0.079                      | 94.9699   |
| 24   | 9      | 15     | 24    | 8       | 16      | A    | 0           | 95272.470    | -0.095                     | 133.8142  |
| 33   | 9      | 25     | 33    | 8       | 26      | E    | 0           | 95344.029    | 0.063                      | 186.3946  |
| 25   | 9      | 17     | 25    | 8       | 18      | A    | 0           | 95355.777    | -0.054                     | 138.8087  |
| 24   | 9      | 15     | 24    | 8       | 16      | E    | 0           | 95377.854    | -0.013                     | 133.8269  |
| 33   | 9      | 25     | 33    | 8       | 26      | A    | 0           | 95381.365    | 0.011                      | 186.3835  |
| 32   | 10     | 22     | 32    | 9       | 23      | E    | 0           | 95424.669    | 0.186                      | 183.1898  |
| 32   | 10     | 22     | 32    | 9       | 23      | A    | 0           | 95461.452    | 0.137                      | 183.1788  |
| 9    | 4      | 5      | 8     | 3       | 6       | A    | 0           | 95628.020    | -0.305                     | 70.4729   |
| 16   | 6      | 11     | 15    | 6       | 10      | A    | 1           | 95644.202    | -0.038                     | 209.2171  |
| 34   | 8      | 27     | 33    | 9       | 24      | A    | 1           | 95677.523    | 0.017                      | 306.6680  |
| 16   | 6      | 11     | 15    | 6       | 10      | A    | 0           | 95680.675    | 0.058                      | 92.4463   |
| 16   | 6      | 10     | 15    | 6       | 9       | E    | 1           | 95685.455    | -0.036                     | 208.9899  |
| 23   | 2      | 21     | 23    | 1       | 22      | A    | 1           | 95703.311    | -0.074                     | 229.3643  |
| 34   | 8      | 27     | 33    | 9       | 24      | A    | 0           | 95706.592    | 0.243                      | 190.0077  |
| 16   | 6      | 11     | 15    | 6       | 10      | E    | 0           | 95722.856    | 0.042                      | 92.4566   |
| 23   | 3      | 21     | 23    | 2       | 22      | A    | 1           | 95731.558    | -0.092                     | 229.3644  |
| 23   | 9      | 15     | 23    | 8       | 16      | A    | 1           | 95760.599    | 0.436                      | 245.6623  |
| 41   | 9      | 32     | 41    | 8       | 33      | A    | 0           | 95765.149    | -0.025                     | 249.7324  |
| 16   | 5      | 12     | 15    | 5       | 11      | A    | 1           | 95778.239    | -0.058                     | 207.1283  |
| 41   | 9      | 32     | 41    | 8       | 33      | E    | 0           | 95807.008    | 0.028                      | 249.7423  |
| 16   | 6      | 11     | 15    | 6       | 10      | E    | 1           | 95813.161    | -0.000                     | 208.5965  |
| 16   | 5      | 12     | 15    | 5       | 11      | A    | 0           | 95828.295    | 0.046                      | 90.3317   |
| 16   | 5      | 12     | 15    | 5       | 11      | E    | 0           | 95832.298    | 0.038                      | 90.3461   |
| 24   | 9      | 16     | 24    | 8       | 17      | E    | 0           | 95918.382    | -0.202                     | 133.7920  |
| 16   | 6      | 10     | 15    | 6       | 9       | E    | 0           | 95934.969    | 0.052                      | 92.4718   |
| 10   | 4      | 7      | 9     | 3       | 6       | A    | 1           | 95941.701    | -0.208                     | 189.2546  |
| 16   | 6      | 10     | 15    | 6       | 9       | A    | 1           | 95950.468    | -0.088                     | 209.2263  |
| 16   | 6      | 10     | 15    | 6       | 9       | A    | 0           | 95974.093    | 0.068                      | 92.4552   |
| 33   | 9      | 25     | 32    | 10      | 22      | A    | 0           | 95995.160    | 0.474                      | 186.3630  |
| 33   | 9      | 25     | 32    | 10      | 22      | E    | 0           | 95997.957    | -0.123                     | 186.3728  |
| 34   | 9      | 26     | 34    | 8       | 27      | E    | 1           | 96034.922    | 0.109                      | 309.4999  |
| 17   | 3      | 15     | 16    | 3       | 14      | A    | 1           | 96068.196    | -0.025                     | 206.6299  |
| 33   | 8      | 26     | 32    | 9       | 23      | A    | 0           | 96074.621    | -0.025                     | 183.1788  |
| 24   | 9      | 16     | 24    | 8       | 17      | A    | 0           | 96133.901    | -0.062                     | 133.7827  |
| 17   | 3      | 15     | 16    | 3       | 14      | E    | 0           | 96161.622    | -0.003                     | 89.8197   |
| 17   | 3      | 15     | 16    | 3       | 14      | A    | 0           | 96164.230    | -0.004                     | 89.8037   |
| 17   | 3      | 15     | 16    | 3       | 14      | E    | 1           | 96168.495    | -0.109                     | 206.1167  |
| 22   | 9      | 13     | 22    | 8       | 14      | A    | 1           | 96200.884    | 0.377                      | 241.0662  |
| 27   | 4      | 23     | 27    | 3       | 24      | A    | 1           | 96238.002    | 0.047                      | 254.5578  |
| 23   | 2      | 21     | 23    | 1       | 22      | E    | 0           | 96270.748    | -0.180                     | 112.5591  |
| 18   | 5      | 14     | 17    | 5       | 12      | E    | 1           | 96277.255    | 0.059                      | 213.5850  |
| 23   | 2      | 21     | 23    | 1       | 22      | A    | 0           | 96292.223    | -0.069                     | 112.5431  |
| 23   | 3      | 21     | 23    | 2       | 22      | A    | 0           | 96323.055    | -0.115                     | 112.5431  |
| 18   | 1      | 17     | 17    | 2       | 16      | A    | 1           | 96337.195    | -0.035                     | 207.5990  |
| 18   | 2      | 17     | 17    | 2       | 16      | A    | 1           | 96362.703    | -0.052                     | 207.5990  |
| 18   | 1      | 17     | 17    | 1       | 16      | A    | 1           | 96384.915    | -0.043                     | 207.5974  |
| 43   | 14     | 30     | 42    | 15      | 27      | A    | 0           | 96390.819    | 0.078                      | 284.9016  |
| 16   | 6      | 10     | 15    | 6       | 10      | E    | 0           | 96392.830    | 0.121                      | 92.4566   |
| 18   | 1      | 17     | 17    | 2       | 16      | E    | 1           | 96395.653    | -0.273                     | 207.0738  |
| 18   | 1      | 17     | 17    | 2       | 16      | E    | 0           | 96406.971    | -0.012                     | 90.7787   |
| 18   | 1      | 17     | 17    | 2       | 16      | A    | 0           | 96408.740    | 0.019                      | 90.7623   |
| 18   | 2      | 17     | 17    | 1       | 16      | A    | 1           | 96410.435    | -0.047                     | 207.5974  |
| 23   | 9      | 14     | 23    | 8       | 15      | A    | 0           | 96417.898    | 0.104                      | 128.9833  |
| 18   | 2      | 17     | 17    | 2       | 16      | E    | 1           | 96423.763    | -0.083                     | 207.0738  |
| 41   | 13     | 29     | 40    | 14      | 27      | E    | 1           | 96430.646    | 0.721                      | 378.9112  |
| 23   | 3      | 21     | 23    | 2       | 22      | E    | 1           | 96431.990    | 0.413                      | 228.8513  |
| 18   | 2      | 17     | 17    | 2       | 16      | E    | 0           | 96434.404    | -0.006                     | 90.7787   |
| 18   | 2      | 17     | 17    | 2       | 16      | A    | 0           | 96436.271    | 0.010                      | 90.7623   |

| $J'$ | $K'_a$ | $K'_c$ | $J''$ | $K''_a$ | $K''_c$ | Sym. | $v_{tCH_3}$ | $\nu_{Obs.}$ | $\nu_{Obs.} - \nu_{Calc.}$ | $E_{low}$ |
|------|--------|--------|-------|---------|---------|------|-------------|--------------|----------------------------|-----------|
| 25   | 3      | 22     | 25    | 2       | 23      | A    | 1           | 96445.243    | -0.055                     | 241.4547  |
| 18   | 1      | 17     | 17    | 1       | 16      | E    | 1           | 96447.595    | -0.117                     | 207.0721  |
| 18   | 1      | 17     | 17    | 1       | 16      | E    | 0           | 96457.970    | -0.068                     | 90.7770   |
| 18   | 1      | 17     | 17    | 1       | 16      | A    | 0           | 96459.947    | -0.027                     | 90.7606   |
| 23   | 9      | 15     | 23    | 8       | 16      | E    | 1           | 96473.340    | -0.745                     | 245.0867  |
| 18   | 2      | 17     | 17    | 1       | 16      | E    | 1           | 96475.557    | -0.076                     | 207.0721  |
| 18   | 2      | 17     | 17    | 1       | 16      | E    | 0           | 96485.478    | 0.013                      | 90.7770   |
| 18   | 2      | 17     | 17    | 1       | 16      | A    | 0           | 96487.567    | 0.054                      | 90.7606   |
| 10   | 4      | 7      | 9     | 3       | 6       | E    | 0           | 96495.052    | -0.258                     | 72.4272   |
| 23   | 9      | 14     | 23    | 8       | 15      | E    | 0           | 96508.474    | 0.124                      | 128.9971  |
| 19   | 0      | 19     | 18    | 0       | 18      | A    | 1           | 96558.063    | -0.070                     | 208.1447  |
| 19   | 1      | 19     | 18    | 0       | 18      | A    | 1           | 96558.063    | -0.070                     | 208.1447  |
| 19   | 0      | 19     | 18    | 1       | 18      | A    | 1           | 96558.063    | -0.070                     | 208.1447  |
| 19   | 1      | 19     | 18    | 1       | 18      | A    | 1           | 96558.063    | -0.070                     | 208.1447  |
| 16   | 5      | 12     | 15    | 5       | 11      | E    | 1           | 96564.656    | 0.103                      | 206.5425  |
| 19   | 1      | 19     | 18    | 1       | 18      | E    | 1           | 96576.821    | -0.069                     | 207.5998  |
| 19   | 0      | 19     | 18    | 0       | 18      | E    | 1           | 96576.821    | -0.069                     | 207.5997  |
| 31   | 7      | 25     | 31    | 6       | 26      | A    | 1           | 96582.320    | 0.041                      | 283.7487  |
| 19   | 0      | 19     | 18    | 0       | 18      | A    | 0           | 96599.370    | -0.143                     | 91.2926   |
| 19   | 0      | 19     | 18    | 1       | 18      | A    | 0           | 96599.370    | -0.143                     | 91.2927   |
| 19   | 1      | 19     | 18    | 1       | 18      | A    | 0           | 96599.370    | -0.143                     | 91.2927   |
| 19   | 0      | 19     | 18    | 0       | 18      | E    | 0           | 96599.370    | 0.159                      | 91.3096   |
| 19   | 1      | 19     | 18    | 0       | 18      | E    | 0           | 96599.370    | 0.159                      | 91.3096   |
| 19   | 1      | 19     | 18    | 1       | 18      | E    | 0           | 96599.370    | 0.159                      | 91.3097   |
| 27   | 4      | 23     | 27    | 3       | 24      | E    | 0           | 96650.025    | -0.051                     | 137.8057  |
| 27   | 4      | 23     | 27    | 3       | 24      | A    | 0           | 96662.436    | -0.051                     | 137.7915  |
| 17   | 2      | 15     | 16    | 2       | 14      | A    | 1           | 96665.087    | -0.032                     | 206.5800  |
| 23   | 9      | 15     | 23    | 8       | 16      | E    | 0           | 96679.837    | -0.042                     | 128.9745  |
| 29   | 6      | 24     | 29    | 5       | 25      | A    | 1           | 96750.097    | 0.054                      | 268.6621  |
| 17   | 2      | 15     | 16    | 2       | 14      | E    | 0           | 96785.856    | -0.055                     | 89.7671   |
| 17   | 2      | 15     | 16    | 2       | 14      | A    | 0           | 96790.087    | -0.023                     | 89.7509   |
| 17   | 2      | 15     | 16    | 2       | 14      | E    | 1           | 96790.098    | -0.257                     | 206.0639  |
| 32   | 6      | 26     | 32    | 5       | 27      | E    | 1           | 96849.112    | -0.030                     | 289.5132  |
| 31   | 7      | 25     | 31    | 6       | 26      | E    | 1           | 96865.361    | -0.640                     | 283.3495  |
| 23   | 9      | 15     | 23    | 8       | 16      | A    | 0           | 96878.792    | -0.070                     | 128.9666  |
| 27   | 5      | 23     | 27    | 4       | 24      | A    | 1           | 96890.701    | 0.032                      | 254.5595  |
| 21   | 9      | 12     | 21    | 8       | 13      | A    | 1           | 96950.201    | 0.327                      | 236.6655  |
| 25   | 3      | 22     | 25    | 2       | 23      | E    | 0           | 96951.222    | -0.093                     | 124.6759  |
| 25   | 3      | 22     | 25    | 2       | 23      | A    | 0           | 96969.059    | -0.091                     | 124.6698  |
| 32   | 6      | 26     | 32    | 5       | 27      | A    | 1           | 96978.073    | 0.026                      | 289.9082  |
| 31   | 7      | 25     | 31    | 6       | 26      | E    | 0           | 96998.112    | 0.047                      | 167.0510  |
| 31   | 7      | 25     | 31    | 6       | 26      | A    | 0           | 97011.428    | 0.025                      | 167.0385  |
| 21   | 9      | 13     | 21    | 8       | 14      | A    | 1           | 97073.513    | 0.484                      | 236.6611  |
| 32   | 6      | 26     | 32    | 5       | 27      | A    | 0           | 97077.871    | 0.194                      | 173.2030  |
| 32   | 6      | 26     | 32    | 5       | 27      | E    | 0           | 97084.010    | 0.216                      | 173.2154  |
| 16   | 5      | 11     | 15    | 5       | 10      | E    | 1           | 97088.761    | -0.140                     | 206.8753  |
| 33   | 8      | 26     | 33    | 7       | 27      | A    | 1           | 97099.235    | 0.254                      | 299.8102  |
| 25   | 4      | 22     | 25    | 3       | 23      | E    | 0           | 97118.363    | -0.064                     | 124.6762  |
| 25   | 4      | 22     | 25    | 2       | 23      | E    | 0           | 97127.539    | -0.230                     | 124.6759  |
| 29   | 6      | 24     | 29    | 5       | 25      | E    | 1           | 97129.188    | -0.570                     | 268.2366  |
| 25   | 4      | 22     | 25    | 3       | 23      | A    | 0           | 97136.866    | -0.179                     | 124.6612  |
| 29   | 6      | 24     | 29    | 5       | 25      | E    | 0           | 97171.415    | 0.019                      | 151.9373  |
| 29   | 6      | 24     | 29    | 5       | 25      | A    | 0           | 97184.622    | -0.057                     | 151.9240  |
| 33   | 8      | 26     | 33    | 7       | 27      | E    | 1           | 97260.792    | -0.635                     | 299.4358  |
| 34   | 9      | 26     | 34    | 8       | 27      | E    | 0           | 97274.611    | 0.035                      | 193.2111  |
| 22   | 9      | 14     | 22    | 8       | 15      | E    | 1           | 97293.261    | -0.605                     | 240.4775  |
| 34   | 9      | 26     | 34    | 8       | 27      | A    | 0           | 97306.315    | 0.045                      | 193.2001  |
| 22   | 9      | 13     | 22    | 8       | 14      | A    | 0           | 97329.667    | -0.025                     | 124.3686  |
| 27   | 5      | 23     | 27    | 4       | 24      | E    | 0           | 97354.986    | -0.066                     | 137.8076  |
| 27   | 5      | 23     | 27    | 4       | 24      | A    | 0           | 97370.562    | -0.060                     | 137.7934  |
| 27   | 5      | 23     | 27    | 4       | 24      | E    | 1           | 97379.966    | -0.542                     | 254.1059  |
| 22   | 9      | 13     | 22    | 8       | 14      | E    | 0           | 97385.235    | 0.009                      | 124.3839  |
| 22   | 9      | 14     | 22    | 8       | 15      | E    | 0           | 97403.438    | -0.094                     | 124.3664  |
| 27   | 5      | 23     | 27    | 3       | 24      | E    | 0           | 97411.727    | 0.016                      | 137.8057  |
| 27   | 5      | 23     | 27    | 3       | 24      | A    | 0           | 97427.504    | -0.073                     | 137.7915  |
| 29   | 6      | 24     | 29    | 4       | 25      | E    | 0           | 97439.550    | 0.103                      | 151.9284  |
| 29   | 6      | 24     | 29    | 4       | 25      | A    | 0           | 97453.989    | -0.102                     | 151.9150  |
| 38   | 8      | 30     | 38    | 7       | 31      | A    | 0           | 97539.681    | 0.124                      | 222.1277  |
| 20   | 9      | 11     | 20    | 8       | 12      | A    | 1           | 97563.199    | 0.326                      | 232.4751  |
| 17   | 3      | 15     | 16    | 2       | 14      | A    | 1           | 97565.046    | -0.072                     | 206.5800  |
| 22   | 9      | 14     | 22    | 8       | 15      | A    | 0           | 97566.099    | -0.074                     | 124.3601  |
| 38   | 8      | 30     | 38    | 7       | 31      | E    | 0           | 97570.593    | 0.116                      | 222.1383  |
| 33   | 8      | 26     | 33    | 7       | 27      | E    | 0           | 97573.933    | 0.077                      | 183.1399  |
| 33   | 8      | 26     | 33    | 7       | 27      | A    | 0           | 97591.394    | 0.094                      | 183.1282  |
| 20   | 9      | 12     | 20    | 8       | 13      | A    | 1           | 97621.073    | 0.519                      | 232.4731  |
| 35   | 7      | 28     | 35    | 6       | 29      | E    | 1           | 97657.576    | -0.016                     | 312.9182  |
| 17   | 3      | 15     | 16    | 2       | 14      | E    | 0           | 97738.446    | -0.068                     | 89.7671   |
| 17   | 3      | 15     | 16    | 2       | 14      | A    | 0           | 97745.758    | -0.052                     | 89.7509   |
| 17   | 3      | 15     | 16    | 2       | 14      | E    | 1           | 97749.191    | -0.411                     | 206.0639  |
| 21   | 9      | 13     | 21    | 8       | 14      | E    | 1           | 97988.469    | -0.556                     | 236.0791  |
| 16   | 5      | 11     | 15    | 5       | 10      | A    | 0           | 97993.542    | 0.231                      | 90.4297   |
| 16   | 5      | 11     | 15    | 5       | 10      | E    | 0           | 97993.542    | -0.104                     | 90.4448   |
| 16   | 5      | 11     | 15    | 5       | 10      | A    | 1           | 98000.889    | -0.070                     | 207.2294  |
| 35   | 7      | 28     | 35    | 6       | 29      | A    | 0           | 98032.163    | 0.216                      | 196.6122  |
| 31   | 7      | 25     | 31    | 5       | 26      | E    | 0           | 98039.717    | 0.018                      | 167.0163  |
| 35   | 7      | 28     | 35    | 6       | 29      | E    | 0           | 98050.142    | 0.195                      | 196.6237  |
| 21   | 9      | 13     | 21    | 8       | 14      | E    | 0           | 98057.479    | -0.054                     | 119.9674  |
| 21   | 9      | 12     | 21    | 8       | 13      | A    | 0           | 98067.233    | -0.013                     | 119.9667  |
| 19   | 9      | 10     | 19    | 8       | 11      | A    | 1           | 98069.477    | 0.314                      | 228.4930  |
| 21   | 9      | 12     | 21    | 8       | 13      | E    | 0           | 98086.911    | -0.024                     | 119.9834  |
| 16   | 3      | 13     | 15    | 3       | 12      | A    | 1           | 98094.287    | -0.062                     | 204.8505  |
| 35   | 7      | 28     | 35    | 6       | 29      | A    | 1           | 98135.707    | -0.003                     | 313.2829  |
| 21   | 9      | 13     | 21    | 8       | 14      | A    | 0           | 98183.241    | -0.023                     | 119.9626  |
| 16   | 3      | 13     | 15    | 3       | 12      | E    | 1           | 98200.238    | -0.216                     | 204.3319  |
| 16   | 3      | 13     | 15    | 3       | 12      | E    | 0           | 98233.593    | -0.053                     | 88.0346   |
| 16   | 3      | 13     | 15    | 3       | 12      | A    | 0           | 98238.122    | -0.057                     | 88.0182   |
| 18   | 9      | 10     | 18    | 8       | 11      | A    | 1           | 98500.733    | 0.450                      | 224.7170  |
| 20   | 9      | 12     | 20    | 8       | 13      | E    | 0           | 98625.877    | -0.027                     | 115.7769  |
| 20   | 9      | 11     | 20    | 8       | 12      | E    | 0           | 98666.603    | 0.011                      | 115.7926  |
| 20   | 9      | 11     | 20    | 8       | 12      | A    | 0           | 98671.659    | -0.030                     | 115.7751  |
| 20   | 9      | 12     | 20    | 8       | 13      | A    | 0           | 98725.870    | -0.111                     | 115.7731  |
| 31   | 10     | 21     | 31    | 9       | 22      | E    | 0           | 98810.943    | 0.182                      | 176.6096  |
| 31   | 10     | 21     | 31    | 9       | 22      | A    | 0           | 98813.487    | 0.151                      | 176.5989  |
| 35   | 9      | 27     | 35    | 8       | 28      | E    | 1           | 98993.805    | -0.740                     | 316.4971  |
| 48   | 11     | 37     | 48    | 10      | 38      | A    | 0           | 99088.997    | -0.675                     | 320.9465  |
| 19   | 9      | 11     | 19    | 8       | 12      | E    | 0           | 99110.195    | -0.050                     | 111.7939  |
| 16   | 9      | 7      | 16    | 8       | 8       | A    | 1           | 99128.675    | 0.399                      | 217.7805  |
| 16   | 9      | 8      | 16    | 8       | 9       | A    | 1           | 99130.217    | 0.366                      | 217.7804  |
| 48   | 11     | 37     | 48    | 10      | 38      | E    | 0           | 99141.724    | -0.571                     | 320.9550  |
| 19   | 9      | 10     | 19    | 8       | 11      | E    | 0           | 99152.596    | 0.001                      | 111.8096  |
| 19   | 9      | 10     | 19    | 8       | 11      | A    | 0           | 99171.546    | -0.033                     | 111.7916  |
| 19   | 9      | 11     | 19    | 8       | 12      | A    | 0           | 99195.687    | -0.036                     | 111.7907  |
| 18   | 9      | 10     | 18    | 8       | 11      | E    | 1           | 99492.948    | -0.477                     | 224.1334  |
| 18   | 9      | 10     | 18    | 8       | 11      | E    | 0           | 99519.062    | -0.062                     | 108.0171  |
| 18   | 9      | 9      | 18    | 8       | 10      | E    | 0           | 99561.107    | 0.036                      | 108.0328  |
| 18   | 9      | 9      | 18    | 8       | 10      | A    | 0           | 99586.895    | -0.064                     | 108.0146  |

| $J'$ | $K'_a$ | $K'_c$ | $J''$ | $K''_a$ | $K''_c$ | Sym. | $v_{tCH_3}$ | $\nu_{Obs.}$ | $\nu_{Obs.} - \nu_{Calc.}$ | $E_{low}$ |
|------|--------|--------|-------|---------|---------|------|-------------|--------------|----------------------------|-----------|
| 18   | 9      | 10     | 18    | 8       | 11      | A    | 0           | 99597.092    | -0.020                     | 108.0142  |
| 13   | 9      | 4      | 13    | 8       | 5       | A    | 1           | 99719.876    | 0.356                      | 208.8948  |
| 13   | 9      | 5      | 13    | 8       | 6       | A    | 1           | 99719.876    | 0.356                      | 208.8948  |
| 18   | 3      | 15     | 17    | 4       | 14      | A    | 0           | 99752.600    | 0.295                      | 95.0079   |
| 18   | 3      | 15     | 17    | 4       | 14      | E    | 0           | 99765.321    | 0.206                      | 95.0233   |
| 35   | 9      | 27     | 35    | 8       | 28      | E    | 0           | 99785.824    | 0.060                      | 200.2064  |
| 35   | 9      | 27     | 35    | 8       | 28      | A    | 0           | 99812.389    | 0.178                      | 200.1956  |
| 8    | 5      | 4      | 7     | 4       | 3       | A    | 1           | 99830.605    | 0.547                      | 187.1113  |
| 17   | 9      | 9      | 17    | 8       | 10      | E    | 1           | 99843.723    | -0.436                     | 220.5632  |
| 12   | 9      | 3      | 12    | 8       | 4       | A    | 1           | 99845.576    | 0.326                      | 206.3346  |
| 12   | 9      | 4      | 12    | 8       | 5       | A    | 1           | 99845.576    | 0.326                      | 206.3346  |
| 17   | 9      | 9      | 17    | 8       | 10      | E    | 0           | 99861.976    | -0.045                     | 104.4453  |
| 17   | 4      | 14     | 16    | 4       | 13      | A    | 1           | 99883.157    | -0.045                     | 208.4864  |
| 8    | 5      | 3      | 7     | 4       | 4       | A    | 1           | 99902.281    | 0.079                      | 187.1091  |
| 17   | 9      | 8      | 17    | 8       | 9       | E    | 0           | 99903.357    | 0.087                      | 104.4611  |
| 17   | 16     | 2      | 16    | 16      | 1       | E    | 1           | 99903.357    | -0.195                     | 255.3371  |
| 17   | 16     | 1      | 16    | 16      | 0       | A    | 1           | 99911.227    | -0.045                     | 255.4809  |
| 17   | 16     | 2      | 16    | 16      | 1       | A    | 1           | 99911.227    | -0.045                     | 255.4809  |
| 17   | 9      | 8      | 17    | 8       | 9       | A    | 0           | 99932.602    | 0.267                      | 104.4428  |
| 17   | 9      | 9      | 17    | 8       | 10      | A    | 0           | 99936.250    | -0.098                     | 104.4426  |
| 17   | 15     | 3      | 16    | 15      | 2       | E    | 1           | 99949.233    | -0.262                     | 249.1537  |
| 17   | 15     | 2      | 16    | 15      | 1       | E    | 1           | 99950.376    | 0.060                      | 249.7818  |
| 17   | 15     | 3      | 16    | 15      | 2       | A    | 1           | 99958.062    | -0.056                     | 249.3683  |
| 17   | 15     | 2      | 16    | 15      | 1       | A    | 1           | 99958.062    | -0.056                     | 249.3683  |
| 6    | 6      | 0      | 5     | 5       | 1       | A    | 1           | 99963.894    | 0.045                      | 186.3120  |
| 6    | 6      | 1      | 5     | 5       | 0       | A    | 1           | 99963.894    | 0.045                      | 186.3120  |
| 17   | 16     | 1      | 16    | 16      | 0       | A    | 0           | 99965.907    | 0.087                      | 139.0978  |
| 17   | 16     | 2      | 16    | 16      | 1       | A    | 0           | 99965.907    | 0.087                      | 139.0978  |
| 17   | 16     | 1      | 16    | 16      | 0       | E    | 0           | 99965.907    | -0.117                     | 139.1023  |
| 17   | 16     | 2      | 16    | 16      | 1       | E    | 0           | 99965.907    | -0.117                     | 139.0832  |
| 17   | 4      | 14     | 16    | 4       | 13      | E    | 0           | 99971.935    | -0.034                     | 91.6886   |
| 17   | 4      | 14     | 16    | 4       | 13      | A    | 0           | 99973.696    | 0.025                      | 91.6732   |
| 17   | 14     | 3      | 16    | 14      | 2       | E    | 1           | 100004.097   | 0.099                      | 244.0089  |
| 17   | 14     | 4      | 16    | 14      | 3       | E    | 1           | 100005.576   | 0.190                      | 243.3727  |
| 17   | 15     | 2      | 16    | 15      | 1       | A    | 0           | 100011.801   | 0.082                      | 132.9450  |
| 17   | 15     | 3      | 16    | 15      | 2       | A    | 0           | 100011.801   | 0.082                      | 132.9450  |
| 17   | 15     | 2      | 16    | 15      | 1       | E    | 0           | 100011.801   | -0.175                     | 132.9518  |
| 17   | 15     | 3      | 16    | 15      | 2       | E    | 0           | 100011.801   | -0.175                     | 132.9321  |
| 37   | 11     | 26     | 37    | 10      | 27      | A    | 0           | 100023.326   | 0.472                      | 222.2162  |
| 17   | 14     | 3      | 16    | 14      | 2       | A    | 0           | 100067.551   | 0.174                      | 127.1905  |
| 17   | 14     | 4      | 16    | 14      | 3       | A    | 0           | 100067.551   | 0.174                      | 127.1905  |
| 17   | 14     | 3      | 16    | 14      | 2       | E    | 0           | 100067.551   | -0.143                     | 127.1995  |
| 17   | 14     | 4      | 16    | 14      | 3       | E    | 0           | 100067.551   | -0.143                     | 127.1795  |
| 17   | 13     | 4      | 16    | 13      | 3       | E    | 1           | 100070.125   | 0.000                      | 238.6303  |
| 17   | 13     | 5      | 16    | 13      | 4       | E    | 1           | 100074.488   | -0.023                     | 237.9948  |
| 17   | 13     | 5      | 16    | 13      | 4       | A    | 1           | 100084.528   | -0.065                     | 238.3416  |
| 17   | 13     | 4      | 16    | 13      | 3       | A    | 1           | 100084.528   | -0.065                     | 238.3416  |
| 17   | 4      | 14     | 16    | 4       | 13      | E    | 1           | 100092.299   | 0.005                      | 207.9782  |
| 17   | 13     | 4      | 16    | 13      | 3       | A    | 0           | 100136.224   | 0.215                      | 121.8349  |
| 17   | 13     | 5      | 16    | 13      | 4       | A    | 0           | 100136.224   | 0.215                      | 121.8349  |
| 17   | 13     | 4      | 16    | 13      | 3       | E    | 0           | 100136.224   | -0.169                     | 121.8459  |
| 17   | 13     | 5      | 16    | 13      | 4       | E    | 0           | 100136.224   | -0.169                     | 121.8259  |
| 16   | 9      | 8      | 16    | 8       | 9       | E    | 0           | 100147.602   | -0.017                     | 101.0774  |
| 16   | 4      | 12     | 15    | 4       | 11      | E    | 1           | 100149.401   | -0.191                     | 205.3760  |
| 17   | 12     | 5      | 16    | 12      | 4       | E    | 1           | 100153.124   | -0.028                     | 233.6470  |
| 17   | 12     | 6      | 16    | 12      | 5       | E    | 1           | 100161.560   | -0.088                     | 233.0210  |
| 17   | 12     | 5      | 16    | 12      | 4       | A    | 1           | 100172.129   | -0.026                     | 233.4274  |
| 17   | 12     | 6      | 16    | 12      | 5       | A    | 1           | 100172.129   | -0.026                     | 233.4274  |
| 16   | 9      | 7      | 16    | 8       | 8       | E    | 0           | 100188.287   | 0.061                      | 101.0933  |
| 16   | 9      | 7      | 16    | 8       | 8       | A    | 0           | 100218.593   | -0.087                     | 101.0749  |
| 17   | 12     | 5      | 16    | 12      | 4       | A    | 0           | 100222.569   | 0.294                      | 116.8786  |
| 17   | 12     | 6      | 16    | 12      | 5       | A    | 0           | 100222.569   | 0.294                      | 116.8786  |
| 17   | 12     | 5      | 16    | 12      | 4       | E    | 0           | 100222.569   | -0.167                     | 116.8915  |
| 17   | 12     | 6      | 16    | 12      | 5       | E    | 0           | 100222.569   | -0.167                     | 116.8718  |
| 30   | 5      | 25     | 30    | 4       | 26      | A    | 1           | 100231.996   | -0.029                     | 274.3402  |
| 17   | 11     | 6      | 16    | 11      | 5       | E    | 1           | 100259.698   | -0.028                     | 229.0601  |
| 42   | 9      | 33     | 42    | 9       | 34      | E    | 1           | 100263.430   | 0.344                      | 374.5400  |
| 17   | 11     | 7      | 16    | 11      | 6       | E    | 1           | 100273.920   | -0.051                     | 228.4523  |
| 17   | 11     | 6      | 16    | 11      | 5       | A    | 1           | 100284.477   | -0.057                     | 228.9129  |
| 17   | 11     | 7      | 16    | 11      | 6       | A    | 1           | 100284.477   | -0.057                     | 228.9129  |
| 30   | 5      | 25     | 30    | 5       | 26      | E    | 1           | 100314.728   | -0.184                     | 273.9253  |
| 17   | 11     | 6      | 16    | 11      | 5       | A    | 0           | 100333.303   | 0.147                      | 112.3226  |
| 17   | 11     | 7      | 16    | 11      | 6       | A    | 0           | 100333.303   | 0.147                      | 112.3226  |
| 17   | 11     | 6      | 16    | 11      | 5       | E    | 0           | 100333.303   | -0.183                     | 112.3372  |
| 17   | 10     | 7      | 16    | 10      | 6       | E    | 1           | 100400.323   | 0.147                      | 224.8713  |
| 30   | 5      | 25     | 30    | 5       | 26      | A    | 0           | 100406.287   | 0.028                      | 157.6129  |
| 17   | 10     | 8      | 16    | 10      | 7       | E    | 1           | 100422.622   | -0.095                     | 224.2902  |
| 16   | 4      | 12     | 15    | 4       | 11      | A    | 1           | 100425.350   | -0.039                     | 205.8628  |
| 17   | 10     | 8      | 16    | 10      | 7       | A    | 1           | 100432.650   | -0.068                     | 224.7989  |
| 17   | 10     | 7      | 16    | 10      | 6       | A    | 1           | 100432.650   | -0.068                     | 224.7989  |
| 15   | 9      | 7      | 15    | 8       | 8       | A    | 0           | 100454.986   | -0.208                     | 97.9100   |
| 16   | 4      | 12     | 15    | 4       | 11      | A    | 0           | 100472.496   | 0.009                      | 89.0392   |
| 16   | 4      | 12     | 15    | 4       | 11      | E    | 0           | 100473.512   | 0.085                      | 89.0552   |
| 17   | 10     | 7      | 16    | 10      | 6       | A    | 0           | 100479.698   | 0.154                      | 108.1683  |
| 17   | 10     | 8      | 16    | 10      | 7       | A    | 0           | 100479.698   | 0.154                      | 108.1683  |
| 17   | 10     | 7      | 16    | 10      | 6       | E    | 0           | 100479.698   | -0.154                     | 108.1844  |
| 17   | 10     | 8      | 16    | 10      | 7       | E    | 0           | 100480.702   | 0.139                      | 108.1661  |
| 8    | 5      | 4      | 7     | 4       | 4       | E    | 0           | 100487.198   | -0.403                     | 70.2946   |
| 8    | 5      | 4      | 7     | 4       | 3       | A    | 0           | 100509.314   | -0.366                     | 70.2847   |
| 24   | 2      | 22     | 24    | 1       | 23      | A    | 1           | 100516.162   | -0.028                     | 233.5704  |
| 24   | 3      | 22     | 24    | 2       | 23      | A    | 1           | 100531.358   | -0.175                     | 233.5704  |
| 8    | 5      | 3      | 7     | 4       | 3       | E    | 0           | 100540.935   | -0.297                     | 70.3038   |
| 7    | 3      | 5      | 6     | 1       | 6       | A    | 0           | 100556.314   | 0.330                      | 65.5422   |
| 30   | 5      | 25     | 30    | 4       | 26      | A    | 0           | 100563.078   | 0.024                      | 157.6077  |
| 18   | 2      | 16     | 17    | 3       | 15      | A    | 1           | 100567.600   | 0.095                      | 209.8344  |
| 14   | 9      | 6      | 14    | 8       | 7       | E    | 0           | 100576.627   | -0.009                     | 94.9495   |
| 17   | 9      | 8      | 16    | 9       | 7       | E    | 1           | 100591.369   | -0.029                     | 221.0832  |
| 17   | 9      | 9      | 16    | 9       | 8       | E    | 1           | 100626.400   | -0.083                     | 220.5371  |
| 18   | 2      | 16     | 17    | 3       | 15      | E    | 1           | 100628.075   | -0.011                     | 209.3245  |
| 18   | 2      | 16     | 17    | 3       | 15      | E    | 0           | 100631.851   | -0.067                     | 93.0273   |
| 18   | 2      | 16     | 17    | 3       | 15      | A    | 0           | 100632.715   | -0.016                     | 93.0114   |
| 17   | 9      | 9      | 16    | 9       | 8       | A    | 1           | 100634.742   | -0.070                     | 221.0871  |
| 17   | 9      | 8      | 16    | 9       | 7       | A    | 1           | 100634.742   | -0.070                     | 221.0871  |
| 14   | 9      | 5      | 14    | 8       | 6       | A    | 0           | 100647.434   | -0.215                     | 94.9470   |
| 14   | 9      | 6      | 14    | 8       | 7       | A    | 0           | 100647.434   | -0.215                     | 94.9470   |
| 17   | 9      | 8      | 16    | 9       | 7       | A    | 0           | 100679.481   | 0.107                      | 104.4178  |
| 17   | 9      | 9      | 16    | 9       | 8       | A    | 0           | 100679.481   | 0.107                      | 104.4178  |
| 17   | 9      | 8      | 16    | 9       | 7       | E    | 0           | 100679.481   | -0.143                     | 104.4352  |
| 17   | 9      | 9      | 16    | 9       | 8       | E    | 0           | 100680.834   | 0.094                      | 104.4180  |
| 6    | 6      | 1      | 5     | 5       | 1       | E    | 0           | 100696.364   | -0.358                     | 69.5151   |
| 13   | 9      | 5      | 13    | 8       | 6       | E    | 0           | 100732.779   | -0.001                     | 92.1876   |
| 6    | 6      | 0      | 5     | 5       | 0       | E    | 0           | 100752.445   | -0.335                     | 69.5261   |
| 13   | 9      | 4      | 13    | 8       | 5       | E    | 0           | 100772.072   | 0.012                      | 92.2037   |
| 13   | 9      | 4      | 13    | 8       | 5       | A    | 0           | 100803.668   | 0.162                      | 92.1853   |
| 13   | 9      | 5      | 13    | 8       | 6       | A    | 0           | 100803.668   | 0.162                      | 92.1853   |
| 17   | 8      | 10     | 16    | 8       | 9       | E    | 1           | 100918.455   | -0.022                     | 217.1969  |

| $J'$ | $K'_a$ | $K'_c$ | $J''$ | $K''_a$ | $K''_c$ | Sym. | $v_{tCH_3}$ | $\nu_{Obs.}$ | $\nu_{Obs.} - \nu_{Calc.}$ | $E_{low}$ |
|------|--------|--------|-------|---------|---------|------|-------------|--------------|----------------------------|-----------|
| 17   | 8      | 10     | 16    | 8       | 9       | A    | 1           | 100921.556   | -0.009                     | 217.7804  |
| 17   | 8      | 9      | 16    | 8       | 8       | A    | 1           | 100924.353   | -0.016                     | 217.7805  |
| 12   | 9      | 3      | 12    | 8       | 4       | A    | 0           | 100927.817   | -0.013                     | 89.6239   |
| 12   | 9      | 4      | 12    | 8       | 5       | A    | 0           | 100927.817   | -0.013                     | 89.6239   |
| 11   | 9      | 3      | 11    | 8       | 4       | E    | 0           | 100955.173   | 0.102                      | 87.2645   |
| 17   | 8      | 10     | 16    | 8       | 9       | A    | 0           | 100963.139   | 0.005                      | 101.0748  |
| 17   | 8      | 9      | 16    | 8       | 8       | E    | 0           | 100964.582   | 0.002                      | 101.0933  |
| 17   | 8      | 9      | 16    | 8       | 8       | A    | 0           | 100966.151   | 0.383                      | 101.0749  |
| 17   | 8      | 10     | 16    | 8       | 9       | E    | 0           | 100966.151   | -0.187                     | 101.0774  |
| 33   | 8      | 26     | 33    | 6       | 27      | A    | 0           | 101009.190   | -0.116                     | 183.0142  |
| 11   | 9      | 2      | 11    | 8       | 3       | A    | 0           | 101025.345   | -0.040                     | 87.2621   |
| 11   | 9      | 3      | 11    | 8       | 4       | A    | 0           | 101025.345   | -0.040                     | 87.2621   |
| 18   | 3      | 16     | 17    | 3       | 15      | A    | 1           | 101096.268   | -0.042                     | 209.8344  |
| 10   | 9      | 1      | 10    | 8       | 2       | A    | 0           | 101100.466   | 0.021                      | 85.0994   |
| 10   | 9      | 2      | 10    | 8       | 3       | A    | 0           | 101100.466   | 0.021                      | 85.0994   |
| 18   | 3      | 16     | 17    | 3       | 15      | E    | 0           | 101194.197   | -0.027                     | 93.0273   |
| 18   | 3      | 16     | 17    | 3       | 15      | A    | 0           | 101196.885   | -0.132                     | 93.0114   |
| 18   | 3      | 16     | 17    | 3       | 15      | E    | 1           | 101196.896   | 0.254                      | 209.3245  |
| 24   | 2      | 22     | 24    | 2       | 23      | E    | 1           | 101254.410   | -0.088                     | 233.0594  |
| 30   | 5      | 25     | 29    | 6       | 23      | E    | 1           | 101266.768   | -0.213                     | 273.8935  |
| 17   | 7      | 10     | 16    | 7       | 9       | E    | 1           | 101273.575   | -0.157                     | 214.7277  |
| 19   | 1      | 18     | 18    | 2       | 17      | A    | 1           | 101305.939   | -0.066                     | 210.8133  |
| 19   | 2      | 18     | 18    | 2       | 17      | A    | 1           | 101319.466   | -0.055                     | 210.8133  |
| 19   | 1      | 18     | 18    | 1       | 17      | A    | 1           | 101331.488   | -0.042                     | 210.8124  |
| 17   | 7      | 11     | 16    | 7       | 10      | A    | 1           | 101336.287   | -0.040                     | 214.8850  |
| 19   | 2      | 18     | 18    | 1       | 17      | A    | 1           | 101345.007   | -0.038                     | 210.8124  |
| 17   | 7      | 11     | 16    | 7       | 10      | E    | 1           | 101365.582   | -0.021                     | 214.2769  |
| 19   | 1      | 18     | 18    | 2       | 17      | E    | 1           | 101365.582   | -0.021                     | 210.2902  |
| 17   | 7      | 11     | 16    | 7       | 10      | A    | 0           | 101374.352   | -0.017                     | 98.1458   |
| 19   | 1      | 18     | 18    | 2       | 17      | E    | 0           | 101377.945   | -0.084                     | 93.9954   |
| 19   | 2      | 18     | 18    | 2       | 17      | E    | 1           | 101380.276   | -0.204                     | 210.2902  |
| 17   | 7      | 10     | 16    | 7       | 9       | A    | 1           | 101386.521   | -0.087                     | 214.8863  |
| 19   | 2      | 18     | 18    | 2       | 17      | E    | 0           | 101392.568   | -0.049                     | 93.9954   |
| 19   | 2      | 18     | 18    | 2       | 17      | A    | 0           | 101394.479   | 0.007                      | 93.9791   |
| 17   | 7      | 11     | 16    | 7       | 10      | E    | 0           | 101397.724   | 0.051                      | 98.1513   |
| 17   | 7      | 10     | 16    | 7       | 9       | E    | 0           | 101401.390   | 0.013                      | 98.1656   |
| 19   | 1      | 18     | 18    | 1       | 17      | E    | 0           | 101405.472   | 0.016                      | 93.9945   |
| 19   | 1      | 18     | 18    | 1       | 17      | E    | 0           | 101407.349   | -0.010                     | 93.9782   |
| 19   | 2      | 18     | 18    | 1       | 17      | E    | 0           | 101420.027   | -0.017                     | 93.9945   |
| 17   | 7      | 10     | 16    | 7       | 9       | A    | 0           | 101422.073   | 0.046                      | 93.9782   |
| 28   | 4      | 24     | 28    | 3       | 25      | A    | 1           | 101422.073   | 0.046                      | 98.1470   |
| 18   | 2      | 16     | 17    | 2       | 15      | A    | 1           | 101423.171   | 0.053                      | 259.7471  |
| 20   | 2      | 18     | 19    | 2       | 17      | E    | 1           | 101467.395   | -0.108                     | 209.8044  |
| 30   | 10     | 20     | 30    | 9       | 21      | A    | 0           | 101476.290   | 0.006                      | 313.2100  |
| 20   | 0      | 20     | 19    | 0       | 19      | A    | 1           | 101495.722   | 0.185                      | 170.2620  |
| 20   | 1      | 20     | 19    | 0       | 19      | A    | 1           | 101514.584   | -0.015                     | 211.3655  |
| 20   | 0      | 20     | 19    | 0       | 19      | A    | 1           | 101514.584   | -0.015                     | 211.3655  |
| 20   | 0      | 20     | 19    | 1       | 19      | A    | 1           | 101514.584   | -0.015                     | 211.3655  |
| 20   | 1      | 20     | 19    | 1       | 19      | A    | 1           | 101514.584   | -0.015                     | 211.3655  |
| 20   | 1      | 20     | 19    | 1       | 19      | E    | 1           | 101533.105   | -0.090                     | 210.8212  |
| 20   | 0      | 20     | 19    | 0       | 19      | E    | 1           | 101533.105   | -0.090                     | 210.8212  |
| 30   | 10     | 20     | 30    | 9       | 21      | E    | 0           | 101537.565   | 0.225                      | 170.2727  |
| 20   | 0      | 20     | 19    | 0       | 19      | A    | 0           | 101557.048   | -0.287                     | 94.5149   |
| 20   | 0      | 20     | 19    | 1       | 19      | A    | 0           | 101557.048   | -0.287                     | 94.5149   |
| 20   | 1      | 20     | 19    | 1       | 19      | A    | 0           | 101557.048   | -0.287                     | 94.5149   |
| 20   | 0      | 20     | 19    | 0       | 19      | E    | 0           | 101557.048   | 0.146                      | 94.5318   |
| 20   | 1      | 20     | 19    | 0       | 19      | E    | 0           | 101557.048   | 0.146                      | 94.5318   |
| 20   | 1      | 20     | 19    | 1       | 19      | E    | 0           | 101557.048   | 0.146                      | 94.5318   |
| 18   | 2      | 16     | 17    | 2       | 15      | E    | 0           | 101584.516   | -0.005                     | 92.9955   |
| 18   | 2      | 16     | 17    | 2       | 15      | E    | 1           | 101587.162   | -0.170                     | 209.2925  |
| 18   | 2      | 16     | 17    | 2       | 15      | A    | 0           | 101588.433   | 0.002                      | 92.9795   |
| 34   | 8      | 27     | 34    | 7       | 28      | A    | 0           | 101646.254   | 0.123                      | 189.8096  |
| 32   | 7      | 26     | 32    | 6       | 27      | E    | 0           | 101659.480   | 0.089                      | 173.2366  |
| 32   | 7      | 26     | 32    | 6       | 27      | A    | 0           | 101671.857   | 0.081                      | 173.2243  |
| 17   | 5      | 13     | 16    | 5       | 12      | A    | 1           | 101740.307   | -0.128                     | 210.3231  |
| 17   | 5      | 13     | 16    | 5       | 12      | A    | 0           | 101800.004   | -0.018                     | 93.5282   |
| 17   | 5      | 13     | 16    | 5       | 12      | E    | 0           | 101801.932   | -0.011                     | 93.5427   |
| 28   | 5      | 24     | 28    | 4       | 25      | A    | 1           | 101813.084   | -0.209                     | 259.7480  |
| 17   | 6      | 12     | 16    | 6       | 11      | A    | 1           | 101821.268   | -0.079                     | 212.4074  |
| 17   | 6      | 12     | 16    | 6       | 11      | A    | 0           | 101860.707   | 0.069                      | 95.6379   |
| 28   | 4      | 24     | 28    | 3       | 25      | E    | 0           | 101880.293   | -0.127                     | 143.0000  |
| 17   | 6      | 12     | 16    | 6       | 11      | E    | 0           | 101888.197   | -0.048                     | 95.6495   |
| 28   | 4      | 24     | 28    | 3       | 25      | A    | 0           | 101894.876   | -0.062                     | 142.9859  |
| 26   | 3      | 23     | 26    | 2       | 24      | E    | 0           | 101917.257   | -0.212                     | 129.3762  |
| 26   | 3      | 23     | 26    | 2       | 24      | A    | 0           | 101936.717   | -0.085                     | 129.3612  |
| 17   | 6      | 11     | 16    | 6       | 10      | E    | 1           | 101978.963   | -0.125                     | 212.1816  |
| 13   | 9      | 4      | 13    | 8       | 5       | E    | 1           | 101992.374   | -0.457                     | 208.8181  |
| 18   | 3      | 16     | 17    | 2       | 15      | A    | 1           | 101996.337   | 0.030                      | 209.8044  |
| 26   | 4      | 23     | 26    | 3       | 24      | E    | 0           | 102012.876   | -0.126                     | 129.3764  |
| 6    | 6      | 0      | 5     | 5       | 0       | E    | 1           | 102023.654   | 0.055                      | 186.0238  |
| 26   | 4      | 23     | 26    | 3       | 24      | A    | 0           | 102032.658   | -0.150                     | 129.3614  |
| 12   | 4      | 9      | 11    | 3       | 8       | A    | 1           | 102042.728   | -0.016                     | 193.6174  |
| 30   | 6      | 25     | 30    | 5       | 26      | E    | 1           | 102057.574   | -0.563                     | 273.9253  |
| 30   | 6      | 25     | 30    | 5       | 26      | E    | 0           | 102086.236   | 0.055                      | 157.6261  |
| 45   | 10     | 35     | 45    | 9       | 36      | A    | 0           | 102087.543   | -0.210                     | 288.5081  |
| 30   | 6      | 25     | 30    | 5       | 26      | A    | 0           | 102099.882   | 0.091                      | 157.6129  |
| 26   | 4      | 23     | 26    | 3       | 24      | E    | 1           | 102104.803   | -0.594                     | 245.6718  |
| 10   | 4      | 6      | 9     | 3       | 7       | A    | 1           | 102113.358   | 0.231                      | 189.0853  |
| 17   | 6      | 12     | 16    | 6       | 11      | E    | 1           | 102117.841   | 0.026                      | 211.7925  |
| 45   | 10     | 35     | 45    | 9       | 36      | E    | 0           | 102136.756   | -0.286                     | 288.5170  |
| 18   | 3      | 16     | 17    | 2       | 15      | E    | 0           | 102146.745   | -0.081                     | 92.9955   |
| 18   | 3      | 16     | 17    | 2       | 15      | A    | 0           | 102152.650   | -0.068                     | 92.9795   |
| 18   | 3      | 16     | 17    | 2       | 15      | E    | 1           | 102155.658   | -0.230                     | 209.2925  |
| 34   | 10     | 25     | 34    | 9       | 26      | E    | 0           | 102172.851   | 0.269                      | 196.4558  |
| 34   | 10     | 25     | 34    | 9       | 26      | A    | 0           | 102236.227   | 0.152                      | 196.4459  |
| 32   | 7      | 26     | 32    | 5       | 27      | E    | 0           | 102292.768   | 0.076                      | 173.2154  |
| 28   | 5      | 24     | 28    | 4       | 25      | E    | 0           | 102303.766   | -0.062                     | 143.0010  |
| 32   | 7      | 26     | 32    | 5       | 27      | A    | 0           | 102308.274   | -0.045                     | 173.2030  |
| 28   | 5      | 24     | 28    | 4       | 25      | A    | 0           | 102320.264   | -0.097                     | 142.9870  |
| 28   | 5      | 24     | 28    | 4       | 25      | E    | 1           | 102339.623   | -0.551                     | 259.2990  |
| 36   | 9      | 28     | 36    | 8       | 29      | E    | 1           | 102344.704   | -0.721                     | 323.6683  |
| 33   | 10     | 24     | 33    | 9       | 25      | E    | 0           | 102347.036   | 0.291                      | 189.5749  |
| 17   | 6      | 11     | 16    | 6       | 10      | E    | 0           | 102385.750   | 0.025                      | 95.6719   |
| 17   | 6      | 11     | 16    | 6       | 10      | A    | 1           | 102393.291   | -0.091                     | 212.4269  |
| 35   | 10     | 26     | 35    | 9       | 27      | E    | 0           | 102395.268   | 0.275                      | 203.5349  |
| 17   | 6      | 11     | 16    | 6       | 10      | A    | 0           | 102409.495   | -0.025                     | 95.6565   |
| 33   | 10     | 24     | 33    | 9       | 25      | A    | 0           | 102423.342   | 0.224                      | 189.5651  |
| 35   | 10     | 26     | 35    | 9       | 27      | A    | 0           | 102449.427   | 0.226                      | 203.5249  |
| 17   | 5      | 13     | 16    | 5       | 12      | E    | 1           | 102555.104   | 0.221                      | 209.7635  |
| 10   | 4      | 6      | 9     | 3       | 7       | A    | 0           | 102613.564   | -0.135                     | 72.2437   |
| 12   | 4      | 9      | 11    | 3       | 8       | E    | 0           | 102641.369   | -0.369                     | 76.7913   |
| 32   | 10     | 23     | 32    | 9       | 24      | E    | 0           | 102823.533   | 0.183                      | 182.8962  |
| 36   | 9      | 28     | 36    | 8       | 29      | E    | 0           | 102857.620   | 0.090                      | 207.3766  |
| 36   | 9      | 28     | 36    | 8       | 29      | A    | 0           | 102879.377   | 0.141                      | 207.3659  |
| 33   | 6      | 27     | 33    | 6       | 28      | E    | 1           | 102894.348   | -0.158                     | 295.8860  |
| 32   | 10     | 23     | 32    | 9       | 24      | A    | 0           | 102919.676   | 0.167                      | 182.8865  |

| $J'$ | $K'_a$ | $K'_c$ | $J''$ | $K''_a$ | $K''_c$ | Sym. | $v_{tCH_3}$ | $\nu_{Obs.}$ | $\nu_{Obs.} - \nu_{Calc.}$ | $E_{low}$ |
|------|--------|--------|-------|---------|---------|------|-------------|--------------|----------------------------|-----------|
| 17   | 3      | 14     | 16    | 3       | 13      | A    | 1           | 103007.561   | -0.039                     | 208.1226  |
| 36   | 10     | 27     | 36    | 9       | 28      | E    | 0           | 103097.606   | 0.276                      | 210.8075  |
| 36   | 10     | 27     | 36    | 9       | 28      | A    | 0           | 103144.180   | 0.208                      | 210.7976  |
| 17   | 3      | 14     | 16    | 3       | 13      | E    | 1           | 103158.921   | -0.309                     | 207.6075  |
| 17   | 3      | 14     | 16    | 3       | 13      | E    | 0           | 103168.800   | -0.101                     | 91.3113   |
| 17   | 3      | 14     | 16    | 3       | 13      | A    | 0           | 103174.593   | -0.081                     | 91.2950   |
| 42   | 12     | 30     | 42    | 11      | 31      | E    | 0           | 103177.943   | -0.128                     | 266.7891  |
| 39   | 8      | 31     | 39    | 8       | 32      | E    | 1           | 103230.117   | 0.019                      | 346.1995  |
| 33   | 6      | 27     | 33    | 5       | 28      | A    | 1           | 103287.033   | 0.127                      | 296.2598  |
| 33   | 6      | 27     | 33    | 5       | 28      | E    | 1           | 103291.974   | -0.214                     | 295.8727  |
| 22   | 5      | 17     | 21    | 6       | 16      | E    | 0           | 103423.027   | 0.468                      | 114.6876  |
| 33   | 6      | 27     | 33    | 5       | 28      | A    | 0           | 103482.237   | 0.075                      | 179.5624  |
| 33   | 6      | 27     | 33    | 5       | 28      | E    | 0           | 103483.654   | 0.200                      | 179.5745  |
| 31   | 10     | 22     | 31    | 9       | 23      | E    | 0           | 103507.114   | 0.201                      | 176.4232  |
| 29   | 10     | 19     | 29    | 9       | 20      | A    | 0           | 103613.370   | 0.196                      | 164.1611  |
| 31   | 10     | 22     | 31    | 9       | 23      | A    | 0           | 103634.042   | 0.239                      | 176.4137  |
| 29   | 10     | 19     | 29    | 9       | 20      | E    | 0           | 103696.213   | 0.205                      | 164.1718  |
| 42   | 9      | 33     | 42    | 8       | 34      | E    | 1           | 103767.213   | -0.180                     | 374.4231  |
| 24   | 6      | 18     | 24    | 5       | 20      | E    | 1           | 103828.938   | 0.408                      | 242.2781  |
| 34   | 8      | 27     | 34    | 6       | 28      | A    | 0           | 103830.616   | -0.101                     | 189.7367  |
| 36   | 7      | 29     | 36    | 7       | 30      | E    | 1           | 103995.276   | -0.079                     | 319.9797  |
| 17   | 5      | 12     | 16    | 5       | 11      | E    | 1           | 104061.860   | -0.187                     | 210.1139  |
| 44   | 14     | 30     | 43    | 15      | 29      | A    | 0           | 104107.825   | -0.297                     | 293.5132  |
| 30   | 9      | 21     | 30    | 8       | 23      | E    | 1           | 104152.288   | -0.465                     | 283.3151  |
| 30   | 10     | 21     | 30    | 9       | 22      | E    | 0           | 104314.148   | 0.238                      | 170.1583  |
| 37   | 10     | 28     | 37    | 9       | 29      | E    | 0           | 104344.583   | 0.261                      | 218.2689  |
| 36   | 7      | 29     | 36    | 7       | 30      | A    | 0           | 104361.159   | 0.238                      | 203.6720  |
| 36   | 7      | 29     | 36    | 7       | 30      | A    | 1           | 104427.052   | 0.105                      | 320.3307  |
| 42   | 9      | 33     | 42    | 8       | 34      | A    | 0           | 104431.328   | -0.006                     | 258.1326  |
| 29   | 10     | 20     | 29    | 9       | 21      | E    | 1           | 104448.767   | -0.418                     | 280.2217  |
| 42   | 9      | 33     | 42    | 8       | 34      | E    | 0           | 104470.115   | 0.009                      | 258.1421  |
| 30   | 10     | 21     | 30    | 9       | 22      | A    | 0           | 104481.880   | 0.212                      | 170.1491  |
| 20   | 4      | 16     | 19    | 5       | 15      | E    | 0           | 104669.143   | -0.073                     | 104.3145  |
| 31   | 9      | 22     | 31    | 8       | 24      | E    | 1           | 104982.751   | 0.258                      | 289.5849  |
| 17   | 5      | 12     | 16    | 5       | 11      | A    | 0           | 104994.091   | 0.091                      | 93.6984   |
| 17   | 5      | 12     | 16    | 5       | 11      | E    | 0           | 104996.703   | 0.091                      | 93.7135   |
| 17   | 5      | 12     | 16    | 5       | 11      | A    | 1           | 105004.803   | -0.091                     | 210.4984  |
| 22   | 8      | 31     | 39    | 7       | 32      | E    | 1           | 105049.299   | 0.040                      | 346.1389  |
| 22   | 5      | 17     | 21    | 6       | 16      | E    | 1           | 105084.507   | -0.342                     | 230.9274  |
| 29   | 10     | 20     | 29    | 9       | 21      | E    | 0           | 105185.972   | 0.175                      | 164.1035  |
| 36   | 7      | 29     | 36    | 6       | 30      | A    | 1           | 105195.141   | 0.144                      | 320.3051  |
| 36   | 7      | 29     | 36    | 6       | 30      | A    | 0           | 105206.886   | 0.041                      | 203.6438  |
| 36   | 7      | 29     | 36    | 6       | 30      | E    | 0           | 105219.082   | 0.139                      | 203.6549  |
| 18   | 4      | 15     | 17    | 4       | 14      | A    | 1           | 105233.878   | 0.020                      | 211.8182  |
| 28   | 10     | 18     | 28    | 9       | 19      | A    | 0           | 105287.398   | 0.136                      | 158.2891  |
| 25   | 2      | 23     | 25    | 1       | 24      | A    | 1           | 105318.417   | -0.193                     | 237.9417  |
| 25   | 3      | 23     | 25    | 1       | 24      | A    | 1           | 105327.054   | -0.068                     | 237.9417  |
| 18   | 4      | 15     | 17    | 4       | 14      | E    | 0           | 105333.448   | 0.041                      | 95.0233   |
| 18   | 4      | 15     | 17    | 4       | 14      | A    | 0           | 105335.741   | 0.058                      | 95.0079   |
| 18   | 4      | 15     | 17    | 4       | 14      | E    | 1           | 105401.078   | -0.015                     | 211.3169  |
| 47   | 11     | 36     | 46    | 13      | 33      | A    | 1           | 105458.621   | 0.273                      | 427.2040  |
| 39   | 8      | 31     | 39    | 7       | 32      | A    | 0           | 105543.219   | 0.119                      | 229.8388  |
| 9    | 5      | 5      | 8     | 4       | 4       | A    | 1           | 105549.228   | -0.109                     | 188.6963  |
| 14   | 4      | 11     | 13    | 3       | 10      | E    | 1           | 105552.671   | 0.397                      | 198.3208  |
| 39   | 8      | 31     | 39    | 7       | 32      | E    | 0           | 105567.968   | -0.349                     | 229.8490  |
| 35   | 8      | 28     | 35    | 7       | 29      | A    | 1           | 105627.572   | 0.234                      | 313.3246  |
| 31   | 5      | 26     | 31    | 4       | 27      | A    | 1           | 105734.729   | 0.019                      | 280.1898  |
| 28   | 10     | 19     | 28    | 9       | 20      | E    | 1           | 105741.491   | 0.180                      | 274.3667  |
| 39   | 8      | 31     | 39    | 7       | 32      | A    | 1           | 105754.669   | 0.047                      | 346.4640  |
| 9    | 5      | 4      | 8     | 4       | 5       | A    | 1           | 105764.473   | -0.091                     | 188.6898  |
| 18   | 17     | 2      | 17    | 17      | 0       | E    | 1           | 105774.889   | -0.090                     | 265.2532  |
| 18   | 17     | 1      | 17    | 17      | 0       | E    | 1           | 105778.192   | -0.156                     | 265.8396  |
| 18   | 17     | 2      | 17    | 17      | 1       | A    | 1           | 105782.715   | -0.095                     | 265.3247  |
| 18   | 17     | 1      | 17    | 17      | 0       | A    | 1           | 105782.715   | -0.095                     | 265.3247  |
| 19   | 2      | 17     | 18    | 3       | 16      | A    | 1           | 105788.215   | -0.101                     | 213.2066  |
| 18   | 16     | 3      | 17    | 16      | 2       | E    | 1           | 105820.111   | -0.164                     | 258.6695  |
| 18   | 16     | 2      | 17    | 16      | 1       | E    | 1           | 105822.124   | -0.108                     | 259.2809  |
| 18   | 16     | 2      | 17    | 16      | 1       | A    | 1           | 105829.066   | -0.091                     | 258.8136  |
| 18   | 16     | 3      | 17    | 16      | 2       | A    | 1           | 105829.066   | -0.091                     | 258.8136  |
| 7    | 6      | 2      | 6     | 5       | 1       | A    | 1           | 105836.388   | 0.296                      | 187.4897  |
| 18   | 17     | 1      | 17    | 17      | 0       | A    | 0           | 105841.178   | 0.123                      | 148.9818  |
| 18   | 17     | 2      | 17    | 17      | 1       | A    | 0           | 105841.178   | 0.123                      | 148.9818  |
| 18   | 17     | 1      | 17    | 17      | 0       | E    | 0           | 105841.178   | -0.069                     | 148.9841  |
| 18   | 17     | 2      | 17    | 17      | 1       | E    | 0           | 105841.178   | -0.069                     | 148.9658  |
| 19   | 2      | 17     | 18    | 3       | 16      | E    | 0           | 105868.855   | -0.118                     | 96.4027   |
| 19   | 2      | 17     | 18    | 3       | 16      | A    | 0           | 105870.674   | 0.013                      | 96.3869   |
| 18   | 15     | 4      | 17    | 15      | 3       | E    | 1           | 105874.566   | -0.084                     | 252.4877  |
| 18   | 15     | 3      | 17    | 15      | 2       | E    | 1           | 105874.566   | -0.084                     | 253.1158  |
| 18   | 16     | 2      | 17    | 16      | 1       | A    | 0           | 105886.545   | 0.117                      | 142.4323  |
| 18   | 16     | 3      | 17    | 16      | 2       | A    | 0           | 105886.545   | 0.117                      | 142.4323  |
| 18   | 16     | 2      | 17    | 16      | 1       | E    | 0           | 105886.545   | -0.131                     | 142.4369  |
| 18   | 16     | 3      | 17    | 16      | 2       | E    | 0           | 105886.545   | -0.131                     | 142.4177  |
| 18   | 14     | 4      | 17    | 14      | 3       | E    | 1           | 105938.237   | -0.006                     | 247.3447  |
| 18   | 15     | 3      | 17    | 15      | 2       | A    | 0           | 105940.877   | 0.171                      | 136.2810  |
| 18   | 15     | 4      | 17    | 15      | 3       | A    | 0           | 105940.877   | 0.171                      | 136.2810  |
| 18   | 15     | 3      | 17    | 15      | 2       | E    | 0           | 105940.877   | -0.137                     | 136.2878  |
| 18   | 15     | 4      | 17    | 15      | 3       | E    | 0           | 105940.877   | -0.137                     | 136.2681  |
| 18   | 14     | 5      | 17    | 14      | 4       | E    | 1           | 105940.877   | 0.029                      | 246.7085  |
| 25   | 2      | 23     | 25    | 1       | 24      | E    | 0           | 105950.575   | 0.293                      | 121.1418  |
| 18   | 14     | 4      | 17    | 14      | 3       | A    | 1           | 105951.559   | -0.012                     | 246.9914  |
| 18   | 14     | 5      | 17    | 14      | 4       | A    | 1           | 105951.559   | -0.012                     | 246.9914  |
| 25   | 3      | 23     | 25    | 2       | 24      | E    | 0           | 105959.162   | -0.178                     | 121.1418  |
| 25   | 2      | 23     | 25    | 1       | 24      | A    | 0           | 105973.988   | -0.253                     | 121.1259  |
| 18   | 14     | 4      | 17    | 14      | 3       | A    | 0           | 106006.772   | 0.167                      | 130.5284  |
| 18   | 14     | 5      | 17    | 14      | 4       | A    | 0           | 106006.772   | 0.167                      | 130.5284  |
| 18   | 14     | 4      | 17    | 14      | 3       | E    | 0           | 106006.772   | -0.209                     | 130.5374  |
| 18   | 14     | 5      | 17    | 14      | 4       | E    | 0           | 106006.772   | -0.209                     | 130.5174  |
| 18   | 13     | 5      | 17    | 13      | 4       | E    | 1           | 106016.655   | -0.006                     | 241.9683  |
| 18   | 13     | 6      | 17    | 13      | 5       | E    | 1           | 106022.752   | -0.067                     | 241.3330  |
| 18   | 13     | 6      | 17    | 13      | 5       | A    | 1           | 106034.214   | -0.020                     | 241.6801  |
| 18   | 13     | 5      | 17    | 13      | 4       | A    | 1           | 106034.214   | -0.020                     | 241.6801  |
| 35   | 8      | 28     | 35    | 7       | 29      | E    | 0           | 106042.860   | 0.081                      | 196.6692  |
| 35   | 8      | 28     | 35    | 7       | 29      | A    | 0           | 106055.277   | -0.047                     | 196.6579  |
| 28   | 10     | 19     | 28    | 9       | 20      | E    | 0           | 106083.836   | 0.133                      | 158.2594  |
| 18   | 13     | 5      | 17    | 13      | 4       | A    | 0           | 106088.143   | 0.180                      | 125.1750  |
| 18   | 13     | 6      | 17    | 13      | 5       | A    | 0           | 106088.143   | 0.180                      | 125.1750  |
| 18   | 13     | 5      | 17    | 13      | 4       | E    | 0           | 106088.143   | -0.273                     | 125.1860  |
| 18   | 13     | 6      | 17    | 13      | 5       | E    | 0           | 106088.143   | -0.273                     | 125.1661  |
| 19   | 3      | 17     | 18    | 3       | 16      | A    | 1           | 106093.016   | -0.140                     | 213.2066  |
| 18   | 12     | 6      | 17    | 12      | 5       | E    | 1           | 106115.266   | 0.031                      | 236.9878  |
| 31   | 5      | 26     | 31    | 4       | 27      | E    | 0           | 106117.689   | 0.029                      | 163.4766  |
| 18   | 12     | 7      | 17    | 12      | 6       | E    | 1           | 106126.099   | -0.166                     | 236.3620  |
| 31   | 5      | 26     | 31    | 4       | 27      | A    | 0           | 106127.468   | 0.110                      | 163.4636  |
| 18   | 12     | 7      | 17    | 12      | 6       | A    | 1           | 106138.050   | -0.054                     | 236.7688  |
| 18   | 12     | 6      | 17    | 12      | 5       | A    | 1           | 106138.050   | -0.054                     | 236.7688  |
| 38   | 10     | 29     | 38    | 9       | 30      | E    | 0           | 106176.239   | 0.291                      | 225.9144  |

| $J'$ | $K'_a$ | $K'_c$ | $J''$ | $K''_a$ | $K''_c$ | Sym. | $v_{tCH_3}$ | $\nu_{Obs.}$ | $\nu_{Obs.} - \nu_{Calc.}$ | $E_{low}$ |
|------|--------|--------|-------|---------|---------|------|-------------|--------------|----------------------------|-----------|
| 18   | 12     | 6      | 17    | 12      | 5       | A    | 0           | 106190.559   | 0.208                      | 120.2217  |
| 18   | 12     | 7      | 17    | 12      | 6       | A    | 0           | 106190.559   | 0.208                      | 120.2217  |
| 18   | 12     | 6      | 17    | 12      | 5       | E    | 0           | 106190.559   | -0.164                     | 120.2345  |
| 19   | 3      | 17     | 18    | 3       | 16      | E    | 1           | 106193.820   | -0.148                     | 212.7001  |
| 19   | 3      | 17     | 18    | 3       | 16      | E    | 0           | 106194.606   | 0.007                      | 96.4027   |
| 19   | 3      | 17     | 18    | 3       | 16      | A    | 0           | 106197.578   | 0.057                      | 96.3869   |
| 38   | 10     | 29     | 38    | 9       | 30      | A    | 0           | 106209.981   | 0.435                      | 225.9047  |
| 35   | 9      | 27     | 34    | 10      | 24      | A    | 0           | 106225.573   | 0.086                      | 199.9816  |
| 18   | 11     | 7      | 17    | 11      | 6       | E    | 1           | 106241.879   | -0.060                     | 232.4044  |
| 35   | 9      | 27     | 34    | 10      | 24      | E    | 0           | 106245.285   | -0.305                     | 199.9909  |
| 18   | 11     | 8      | 17    | 11      | 7       | E    | 1           | 106259.704   | -0.086                     | 231.7970  |
| 20   | 1      | 19     | 19    | 2       | 18      | A    | 1           | 106267.815   | -0.012                     | 214.1929  |
| 18   | 11     | 8      | 17    | 11      | 7       | A    | 1           | 106271.598   | -0.025                     | 232.2581  |
| 18   | 11     | 7      | 17    | 11      | 6       | A    | 1           | 106271.598   | -0.025                     | 232.2581  |
| 20   | 2      | 19     | 19    | 2       | 18      | A    | 1           | 106274.864   | 0.067                      | 214.1929  |
| 27   | 3      | 24     | 27    | 2       | 25      | A    | 1           | 106274.864   | 0.067                      | 251.0128  |
| 20   | 1      | 19     | 19    | 1       | 18      | A    | 1           | 106281.301   | -0.042                     | 214.1925  |
| 20   | 2      | 19     | 19    | 1       | 18      | A    | 1           | 106288.297   | -0.141                     | 214.1925  |
| 28   | 10     | 19     | 28    | 9       | 20      | A    | 0           | 106307.614   | 0.163                      | 158.2515  |
| 9    | 5      | 4      | 8     | 4       | 4       | E    | 0           | 106310.355   | 0.267                      | 71.8882   |
| 19   | 2      | 17     | 18    | 2       | 16      | A    | 1           | 106317.049   | -0.072                     | 213.1890  |
| 18   | 11     | 7      | 17    | 11      | 6       | A    | 0           | 106322.243   | 0.102                      | 115.6694  |
| 18   | 11     | 8      | 17    | 11      | 7       | A    | 0           | 106322.243   | 0.102                      | 115.6694  |
| 18   | 11     | 7      | 17    | 11      | 6       | E    | 0           | 106322.243   | -0.267                     | 115.6840  |
| 18   | 11     | 8      | 17    | 11      | 7       | E    | 0           | 106323.081   | 0.014                      | 115.6648  |
| 20   | 2      | 19     | 19    | 2       | 18      | E    | 1           | 106335.519   | -0.161                     | 213.6719  |
| 20   | 1      | 19     | 19    | 2       | 18      | E    | 0           | 106341.580   | -0.097                     | 97.3775   |
| 20   | 1      | 19     | 19    | 2       | 18      | A    | 0           | 106343.525   | 0.030                      | 97.3613   |
| 20   | 2      | 19     | 19    | 2       | 18      | E    | 0           | 106349.336   | -0.033                     | 97.3775   |
| 20   | 2      | 19     | 19    | 2       | 18      | A    | 0           | 106351.214   | -0.008                     | 97.3613   |
| 20   | 1      | 19     | 19    | 1       | 18      | E    | 0           | 106356.252   | -0.013                     | 97.3770   |
| 20   | 1      | 19     | 19    | 1       | 18      | A    | 0           | 106358.138   | -0.008                     | 97.3608   |
| 20   | 2      | 19     | 19    | 1       | 18      | E    | 0           | 106363.966   | 0.009                      | 97.3770   |
| 20   | 2      | 19     | 19    | 1       | 18      | A    | 0           | 106365.883   | 0.009                      | 97.3608   |
| 18   | 10     | 8      | 17    | 10      | 7       | E    | 1           | 106409.169   | -0.040                     | 228.2203  |
| 19   | 2      | 17     | 18    | 2       | 16      | E    | 0           | 106431.333   | 0.055                      | 96.3840   |
| 18   | 10     | 9      | 17    | 10      | 8       | A    | 0           | 106434.903   | -0.044                     | 96.3681   |
| 33   | 7      | 27     | 33    | 5       | 28      | A    | 1           | 106436.881   | -0.066                     | 227.6399  |
| 9    | 5      | 4      | 8     | 4       | 5       | A    | 0           | 106443.850   | 0.002                      | 296.2598  |
| 37   | 9      | 29     | 37    | 8       | 30      | E    | 0           | 106443.827   | -0.129                     | 71.8641   |
| 18   | 10     | 9      | 17    | 10      | 8       | A    | 1           | 106445.008   | 0.127                      | 214.7183  |
| 18   | 10     | 8      | 17    | 10      | 7       | A    | 1           | 106448.000   | -0.041                     | 228.1490  |
| 37   | 9      | 29     | 37    | 8       | 30      | A    | 0           | 106448.000   | -0.041                     | 228.1490  |
| 30   | 8      | 22     | 29    | 9       | 21      | A    | 0           | 106462.635   | -0.036                     | 214.7079  |
| 21   | 0      | 21     | 20    | 0       | 20      | A    | 1           | 106462.635   | -0.036                     | 164.0947  |
| 21   | 1      | 21     | 20    | 0       | 20      | A    | 1           | 106471.001   | -0.056                     | 214.7517  |
| 21   | 0      | 21     | 20    | 1       | 20      | A    | 1           | 106471.001   | -0.056                     | 214.7517  |
| 21   | 1      | 21     | 20    | 1       | 20      | A    | 1           | 106471.001   | -0.056                     | 214.7517  |
| 21   | 1      | 21     | 20    | 1       | 20      | E    | 1           | 106489.385   | -0.110                     | 214.2080  |
| 21   | 0      | 21     | 20    | 0       | 20      | E    | 1           | 106489.385   | -0.110                     | 214.2080  |
| 18   | 10     | 8      | 17    | 10      | 7       | A    | 0           | 106496.610   | 0.143                      | 111.5200  |
| 18   | 10     | 9      | 17    | 10      | 8       | A    | 0           | 106496.610   | 0.143                      | 111.5200  |
| 18   | 10     | 8      | 17    | 10      | 7       | E    | 0           | 106496.610   | -0.197                     | 111.5361  |
| 18   | 10     | 9      | 17    | 10      | 8       | E    | 0           | 106497.851   | 0.167                      | 111.5177  |
| 33   | 7      | 27     | 33    | 6       | 28      | E    | 0           | 106506.545   | 0.083                      | 179.5872  |
| 21   | 0      | 21     | 20    | 0       | 20      | A    | 0           | 106514.889   | -0.229                     | 97.9025   |
| 21   | 0      | 21     | 20    | 1       | 20      | A    | 0           | 106514.889   | -0.229                     | 97.9025   |
| 21   | 1      | 21     | 20    | 1       | 20      | A    | 0           | 106514.889   | -0.229                     | 97.9025   |
| 21   | 0      | 21     | 20    | 0       | 20      | E    | 0           | 106514.889   | 0.267                      | 97.9194   |
| 21   | 1      | 21     | 20    | 0       | 20      | E    | 0           | 106514.889   | 0.267                      | 97.9194   |
| 21   | 1      | 21     | 20    | 1       | 20      | E    | 0           | 106514.889   | 0.267                      | 97.9194   |
| 33   | 7      | 27     | 33    | 6       | 28      | A    | 0           | 106518.487   | 0.038                      | 179.5751  |
| 17   | 4      | 13     | 16    | 4       | 12      | E    | 1           | 106588.607   | -0.149                     | 208.7166  |
| 31   | 6      | 26     | 31    | 5       | 27      | A    | 1           | 106612.209   | 0.062                      | 280.1925  |
| 19   | 3      | 17     | 18    | 2       | 16      | A    | 1           | 106621.943   | -0.018                     | 213.1890  |
| 27   | 10     | 17     | 27    | 9       | 18      | A    | 0           | 106625.294   | 0.004                      | 152.6403  |
| 7    | 6      | 1      | 6     | 5       | 1       | E    | 0           | 106627.990   | -0.321                     | 70.7044   |
| 18   | 9      | 9      | 17    | 9       | 8       | E    | 1           | 106637.547   | -0.025                     | 224.4386  |
| 18   | 9      | 10     | 17    | 9       | 9       | E    | 1           | 106680.361   | 0.003                      | 223.8937  |
| 18   | 9      | 10     | 17    | 9       | 9       | A    | 1           | 106689.379   | -0.008                     | 224.4439  |
| 18   | 9      | 9      | 17    | 9       | 8       | A    | 1           | 106689.379   | -0.008                     | 224.4439  |
| 27   | 10     | 17     | 27    | 9       | 18      | E    | 0           | 106720.818   | 0.004                      | 152.6526  |
| 17   | 4      | 13     | 16    | 4       | 12      | A    | 1           | 106726.675   | -0.090                     | 209.2126  |
| 18   | 9      | 9      | 17    | 9       | 8       | A    | 0           | 106735.206   | 0.069                      | 107.7761  |
| 18   | 9      | 10     | 17    | 9       | 9       | A    | 0           | 106735.206   | 0.069                      | 107.7761  |
| 18   | 9      | 9      | 17    | 9       | 8       | E    | 0           | 106735.206   | -0.199                     | 107.7935  |
| 18   | 9      | 10     | 17    | 9       | 9       | E    | 0           | 106736.786   | 0.017                      | 107.7763  |
| 29   | 5      | 25     | 29    | 4       | 26      | A    | 1           | 106746.936   | 0.437                      | 265.1015  |
| 19   | 3      | 17     | 18    | 2       | 16      | E    | 0           | 106756.909   | 0.004                      | 96.3840   |
| 19   | 3      | 17     | 18    | 2       | 16      | A    | 0           | 106761.948   | 0.140                      | 96.3681   |
| 19   | 3      | 17     | 18    | 2       | 16      | E    | 1           | 106762.425   | -0.100                     | 212.6811  |
| 29   | 5      | 25     | 29    | 3       | 26      | A    | 1           | 106762.519   | 0.191                      | 265.1009  |
| 17   | 4      | 13     | 16    | 4       | 12      | A    | 0           | 106803.752   | -0.176                     | 92.3906   |
| 17   | 4      | 13     | 16    | 4       | 12      | E    | 0           | 106803.752   | 0.210                      | 92.4067   |
| 27   | 3      | 24     | 27    | 2       | 25      | E    | 0           | 106849.232   | -0.090                     | 134.2416  |
| 33   | 7      | 27     | 33    | 5       | 28      | E    | 0           | 106886.185   | 0.052                      | 179.5745  |
| 33   | 7      | 27     | 33    | 5       | 28      | A    | 0           | 106900.276   | 0.106                      | 179.5624  |
| 27   | 4      | 24     | 27    | 3       | 25      | E    | 0           | 106903.150   | -0.171                     | 134.2417  |
| 19   | 3      | 16     | 18    | 4       | 15      | A    | 0           | 106911.275   | -0.290                     | 98.5216   |
| 19   | 3      | 16     | 18    | 4       | 15      | E    | 0           | 106920.069   | 0.173                      | 98.5369   |
| 27   | 4      | 24     | 27    | 3       | 25      | A    | 0           | 106923.958   | -0.377                     | 134.2268  |
| 18   | 8      | 10     | 17    | 8       | 9       | E    | 1           | 106963.553   | -0.091                     | 221.0641  |
| 27   | 10     | 18     | 27    | 9       | 19      | E    | 0           | 106975.960   | 0.192                      | 152.6264  |
| 29   | 4      | 25     | 29    | 3       | 26      | E    | 0           | 107014.335   | -0.009                     | 148.3588  |
| 29   | 4      | 25     | 29    | 3       | 26      | A    | 0           | 107030.957   | 0.267                      | 148.3449  |
| 18   | 8      | 11     | 17    | 8       | 10      | E    | 1           | 107030.957   | -0.135                     | 220.5632  |
| 18   | 8      | 11     | 17    | 8       | 10      | A    | 1           | 107032.107   | 0.112                      | 221.1468  |
| 18   | 8      | 10     | 17    | 8       | 9       | A    | 1           | 107038.834   | 0.003                      | 221.1470  |
| 31   | 6      | 26     | 31    | 5       | 27      | E    | 0           | 107069.559   | 0.008                      | 163.4795  |
| 18   | 8      | 11     | 17    | 8       | 10      | A    | 0           | 107074.259   | 0.029                      | 104.4426  |
| 18   | 8      | 10     | 17    | 8       | 9       | E    | 0           | 107077.612   | 0.008                      | 104.4611  |
| 18   | 8      | 11     | 17    | 8       | 10      | E    | 0           | 107079.642   | -0.024                     | 104.4453  |
| 18   | 8      | 10     | 17    | 8       | 9       | A    | 0           | 107080.713   | 0.057                      | 104.4428  |
| 31   | 6      | 26     | 31    | 5       | 27      | A    | 0           | 107083.780   | -0.010                     | 163.4666  |
| 31   | 6      | 26     | 31    | 4       | 27      | E    | 0           | 107159.382   | 0.087                      | 163.4766  |
| 31   | 6      | 26     | 31    | 4       | 27      | A    | 0           | 107174.040   | 0.001                      | 163.4636  |
| 27   | 10     | 18     | 27    | 9       | 19      | A    | 0           | 107189.811   | 0.221                      | 152.6198  |
| 26   | 10     | 17     | 26    | 9       | 17      | E    | 0           | 107243.013   | -0.184                     | 147.2239  |
| 29   | 5      | 25     | 29    | 4       | 26      | E    | 0           | 107264.825   | -0.081                     | 148.3594  |
| 29   | 5      | 25     | 29    | 4       | 26      | A    | 0           | 107282.480   | -0.033                     | 148.3454  |
| 29   | 5      | 25     | 29    | 3       | 26      | E    | 0           | 107282.480   | 0.084                      | 148.3588  |
| 29   | 5      | 25     | 29    | 3       | 26      | A    | 0           | 107300.194   | 0.090                      | 148.3449  |
| 35   | 8      | 28     | 35    | 6       | 29      | A    | 0           | 107425.688   | 0.004                      | 196.6122  |
| 15   | 4      | 12     | 14    | 3       | 11      | A    | 1           | 107455.648   | 0.022                      | 201.7526  |
| 18   | 7      | 11     | 17    | 7       | 10      | E    | 1           | 107462.050   | 0.021                      | 218.1058  |

| $J'$ | $K'_a$ | $K'_c$ | $J''$ | $K''_a$ | $K''_c$ | Sym. | $v_{tCH_3}$ | $\nu_{Obs.}$ | $\nu_{Obs.} - \nu_{Calc.}$ | $E_{low}$ |
|------|--------|--------|-------|---------|---------|------|-------------|--------------|----------------------------|-----------|
| 6    | 4      | 3      | 5     | 2       | 4       | E    | 0           | 107474.045   | 0.253                      | 65.3281   |
| 18   | 7      | 12     | 17    | 7       | 11      | A    | 1           | 107515.737   | -0.081                     | 218.2652  |
| 18   | 7      | 12     | 17    | 7       | 11      | A    | 0           | 107554.656   | 0.117                      | 101.5273  |
| 18   | 7      | 12     | 17    | 7       | 11      | E    | 1           | 107574.619   | 0.018                      | 217.6581  |
| 18   | 7      | 12     | 17    | 7       | 11      | E    | 0           | 107592.754   | 0.016                      | 101.5335  |
| 18   | 5      | 14     | 17    | 5       | 13      | A    | 1           | 107607.684   | -0.102                     | 213.7168  |
| 18   | 7      | 11     | 17    | 7       | 10      | E    | 0           | 107619.293   | 0.016                      | 101.5480  |
| 18   | 7      | 11     | 17    | 7       | 10      | A    | 1           | 107620.868   | -0.078                     | 218.2682  |
| 18   | 7      | 11     | 17    | 7       | 10      | A    | 0           | 107654.398   | 0.087                      | 101.5300  |
| 18   | 5      | 14     | 17    | 5       | 13      | A    | 0           | 107679.158   | 0.228                      | 96.9239   |
| 18   | 5      | 14     | 17    | 5       | 13      | E    | 0           | 107679.158   | -0.380                     | 96.9385   |
| 18   | 3      | 15     | 17    | 3       | 14      | A    | 1           | 107706.264   | -0.077                     | 211.5585  |
| 26   | 10     | 16     | 26    | 9       | 17      | A    | 0           | 107711.695   | 0.199                      | 147.2102  |
| 26   | 10     | 16     | 26    | 9       | 17      | E    | 0           | 107775.784   | 0.231                      | 147.2239  |
| 26   | 10     | 17     | 26    | 9       | 18      | E    | 0           | 107831.963   | 0.196                      | 147.2042  |
| 26   | 10     | 17     | 26    | 9       | 18      | E    | 1           | 107841.435   | -0.337                     | 263.3049  |
| 18   | 3      | 15     | 17    | 3       | 14      | E    | 0           | 107880.986   | -0.078                     | 94.7526   |
| 18   | 3      | 15     | 17    | 3       | 14      | E    | 1           | 107886.484   | -0.411                     | 211.0485  |
| 18   | 3      | 15     | 17    | 3       | 14      | A    | 0           | 107887.567   | -0.042                     | 94.7366   |
| 18   | 6      | 13     | 17    | 6       | 12      | A    | 1           | 107992.564   | -0.017                     | 215.8038  |
| 26   | 10     | 17     | 26    | 9       | 18      | A    | 0           | 108012.601   | 0.150                      | 147.1993  |
| 18   | 6      | 13     | 17    | 6       | 12      | A    | 0           | 108036.353   | 0.048                      | 99.0356   |
| 18   | 6      | 13     | 17    | 6       | 12      | E    | 0           | 108051.380   | 0.037                      | 99.0482   |
| 15   | 4      | 12     | 14    | 3       | 11      | A    | 0           | 108065.417   | -0.512                     | 84.9164   |
| 25   | 10     | 16     | 25    | 9       | 16      | E    | 0           | 108098.784   | 0.020                      | 142.0101  |
| 49   | 11     | 38     | 49    | 10      | 39      | A    | 0           | 108226.419   | -0.619                     | 330.8924  |
| 49   | 11     | 38     | 49    | 10      | 39      | E    | 0           | 108282.875   | -0.649                     | 330.9002  |
| 18   | 5      | 14     | 17    | 5       | 13      | E    | 1           | 108287.747   | 0.243                      | 213.1844  |
| 37   | 11     | 27     | 37    | 10      | 28      | E    | 1           | 108331.520   | 0.180                      | 337.9667  |
| 18   | 6      | 12     | 17    | 6       | 11      | E    | 1           | 108373.687   | -0.081                     | 215.5832  |
| 18   | 6      | 13     | 17    | 6       | 12      | E    | 1           | 108472.636   | 0.075                      | 215.1988  |
| 39   | 10     | 30     | 39    | 9       | 31      | E    | 0           | 108604.192   | 0.285                      | 233.7393  |
| 25   | 10     | 15     | 25    | 9       | 16      | A    | 0           | 108607.716   | 0.179                      | 141.9950  |
| 25   | 10     | 16     | 25    | 9       | 17      | E    | 0           | 108620.664   | 0.166                      | 141.9927  |
| 39   | 10     | 30     | 39    | 9       | 31      | A    | 0           | 108631.785   | 0.164                      | 233.7297  |
| 25   | 10     | 15     | 25    | 9       | 16      | E    | 1           | 108634.232   | 0.279                      | 142.0101  |
| 25   | 10     | 16     | 25    | 9       | 17      | E    | 0           | 108682.637   | -0.226                     | 258.0943  |
| 25   | 10     | 16     | 25    | 9       | 17      | A    | 0           | 108762.441   | 0.267                      | 141.9894  |
| 18   | 6      | 12     | 17    | 6       | 11      | E    | 0           | 108991.659   | 0.133                      | 99.0871   |
| 18   | 6      | 12     | 17    | 6       | 11      | A    | 1           | 108996.489   | -0.034                     | 215.8423  |
| 18   | 6      | 12     | 17    | 6       | 11      | A    | 0           | 109002.037   | 0.134                      | 99.0725   |
| 16   | 4      | 13     | 15    | 3       | 12      | E    | 1           | 109314.242   | 0.283                      | 204.3319  |
| 24   | 10     | 15     | 24    | 9       | 16      | E    | 0           | 109322.101   | 0.176                      | 136.9915  |
| 24   | 10     | 14     | 24    | 9       | 15      | E    | 0           | 109354.698   | 0.316                      | 137.0083  |
| 24   | 10     | 14     | 24    | 9       | 15      | A    | 0           | 109357.293   | 0.295                      | 136.9921  |
| 34   | 6      | 28     | 34    | 5       | 29      | E    | 1           | 109378.050   | 0.065                      | 302.3934  |
| 36   | 11     | 26     | 36    | 10      | 27      | E    | 1           | 109500.365   | 0.114                      | 330.4333  |
| 34   | 6      | 28     | 34    | 5       | 29      | E    | 0           | 109530.274   | 0.132                      | 186.0950  |
| 34   | 6      | 28     | 34    | 5       | 29      | A    | 0           | 109533.251   | 0.242                      | 186.0831  |
| 16   | 4      | 13     | 15    | 3       | 12      | E    | 0           | 109546.231   | -0.296                     | 88.0346   |
| 43   | 9      | 34     | 43    | 9       | 35      | E    | 1           | 109933.998   | 0.329                      | 383.0481  |
| 23   | 10     | 13     | 23    | 9       | 14      | E    | 0           | 109970.234   | 0.203                      | 132.2163  |
| 23   | 10     | 13     | 23    | 9       | 14      | A    | 0           | 109990.621   | 0.266                      | 132.1994  |
| 9    | 6      | 4      | 8     | 4       | 5       | A    | 1           | 170059.538   | 0.324                      | 188.6898  |
| 40   | 4      | 37     | 40    | 3       | 38      | E    | 1           | 170059.544   | -0.484                     | 328.8096  |
| 40   | 3      | 37     | 40    | 3       | 38      | E    | 1           | 170059.544   | -0.484                     | 328.8096  |
| 40   | 4      | 37     | 40    | 2       | 38      | E    | 1           | 170059.544   | -0.484                     | 328.8096  |
| 40   | 3      | 37     | 40    | 2       | 38      | E    | 1           | 170059.544   | -0.484                     | 328.8096  |
| 29   | 6      | 24     | 28    | 6       | 23      | A    | 1           | 170217.987   | -0.083                     | 266.2115  |
| 30   | 4      | 26     | 29    | 5       | 25      | A    | 1           | 170225.452   | 0.002                      | 268.6621  |
| 9    | 6      | 4      | 8     | 4       | 5       | E    | 1           | 170237.167   | -0.105                     | 188.0575  |
| 28   | 8      | 21     | 27    | 8       | 20      | E    | 1           | 170316.033   | 0.132                      | 265.6683  |
| 30   | 5      | 26     | 29    | 5       | 25      | A    | 1           | 170367.663   | -0.070                     | 268.6621  |
| 29   | 27     | 2      | 28    | 27      | 1       | E    | 1           | 170372.686   | -0.409                     | 402.5729  |
| 31   | 3      | 28     | 30    | 4       | 27      | A    | 1           | 170374.729   | -0.130                     | 270.6198  |
| 29   | 27     | 2      | 28    | 27      | 1       | A    | 1           | 170377.373   | -0.177                     | 402.0238  |
| 29   | 27     | 3      | 28    | 27      | 2       | A    | 1           | 170377.373   | -0.177                     | 402.0238  |
| 31   | 4      | 28     | 30    | 4       | 27      | A    | 1           | 170379.459   | -0.088                     | 270.6198  |
| 30   | 4      | 26     | 29    | 5       | 25      | E    | 1           | 170380.925   | 0.585                      | 268.2366  |
| 31   | 3      | 28     | 30    | 3       | 27      | A    | 1           | 170383.444   | -0.061                     | 270.6195  |
| 31   | 4      | 28     | 30    | 3       | 27      | A    | 1           | 170388.298   | 0.106                      | 270.6195  |
| 30   | 4      | 26     | 29    | 5       | 25      | E    | 0           | 170388.302   | -0.052                     | 151.9373  |
| 30   | 4      | 26     | 29    | 5       | 25      | A    | 0           | 170392.858   | 0.014                      | 151.9240  |
| 29   | 6      | 24     | 28    | 6       | 23      | E    | 0           | 170401.872   | -0.047                     | 149.4946  |
| 29   | 6      | 24     | 28    | 6       | 23      | A    | 0           | 170407.098   | -0.044                     | 149.4816  |
| 29   | 6      | 24     | 28    | 6       | 23      | E    | 1           | 170421.052   | -0.173                     | 265.7918  |
| 14   | 8      | 7      | 13    | 7       | 6       | A    | 1           | 170427.205   | 0.385                      | 205.9705  |
| 29   | 26     | 3      | 28    | 26      | 2       | E    | 1           | 170430.685   | 0.083                      | 392.0902  |
| 29   | 28     | 2      | 28    | 28      | 1       | E    | 0           | 170433.628   | -0.357                     | 296.7877  |
| 30   | 4      | 26     | 29    | 4       | 25      | A    | 1           | 170471.057   | -0.051                     | 268.6539  |
| 29   | 25     | 5      | 28    | 25      | 4       | E    | 1           | 170473.560   | 0.025                      | 381.8580  |
| 29   | 27     | 2      | 28    | 27      | 1       | A    | 0           | 170478.079   | -0.276                     | 285.8963  |
| 29   | 27     | 3      | 28    | 27      | 2       | A    | 0           | 170478.079   | -0.276                     | 285.8963  |
| 29   | 27     | 3      | 28    | 27      | 2       | E    | 0           | 170478.079   | -0.403                     | 285.8789  |
| 32   | 2      | 30     | 31    | 2       | 29      | A    | 1           | 170502.914   | -0.085                     | 272.1105  |
| 32   | 3      | 30     | 31    | 2       | 29      | A    | 1           | 170502.914   | -0.085                     | 272.1105  |
| 32   | 2      | 30     | 31    | 3       | 29      | A    | 1           | 170502.914   | -0.085                     | 272.1105  |
| 32   | 3      | 30     | 31    | 3       | 29      | A    | 1           | 170502.914   | -0.085                     | 272.1105  |
| 31   | 4      | 28     | 30    | 4       | 27      | E    | 1           | 170514.905   | -0.106                     | 270.1799  |
| 31   | 3      | 28     | 30    | 3       | 27      | E    | 1           | 170519.524   | -0.059                     | 270.1796  |
| 31   | 3      | 28     | 30    | 4       | 27      | E    | 0           | 170522.862   | -0.107                     | 153.8826  |
| 31   | 3      | 28     | 30    | 4       | 27      | A    | 0           | 170526.958   | -0.137                     | 153.8688  |
| 29   | 26     | 4      | 28    | 26      | 3       | E    | 0           | 170526.958   | -0.102                     | 275.3656  |
| 31   | 4      | 28     | 30    | 4       | 27      | E    | 0           | 170528.197   | 0.001                      | 153.8826  |
| 31   | 3      | 28     | 30    | 3       | 27      | E    | 0           | 170532.439   | -0.127                     | 153.8823  |
| 31   | 3      | 28     | 30    | 3       | 27      | E    | 0           | 170532.439   | -0.127                     | 153.8823  |
| 31   | 4      | 28     | 30    | 4       | 27      | A    | 0           | 170532.445   | 0.090                      | 153.8688  |
| 31   | 3      | 28     | 30    | 3       | 27      | A    | 0           | 170536.647   | -0.104                     | 153.8685  |
| 31   | 4      | 28     | 30    | 3       | 27      | E    | 0           | 170538.055   | 0.262                      | 153.8823  |
| 30   | 5      | 26     | 29    | 5       | 25      | E    | 1           | 170542.802   | -0.300                     | 268.2366  |
| 30   | 5      | 26     | 29    | 5       | 25      | E    | 0           | 170544.206   | -0.107                     | 151.9373  |
| 30   | 5      | 26     | 29    | 5       | 25      | A    | 0           | 170549.593   | -0.046                     | 151.9240  |
| 29   | 25     | 4      | 28    | 25      | 3       | A    | 0           | 170581.063   | -0.073                     | 265.2694  |
| 29   | 25     | 5      | 28    | 25      | 4       | A    | 0           | 170581.063   | -0.073                     | 265.2694  |
| 29   | 25     | 5      | 28    | 25      | 4       | E    | 0           | 170581.063   | -0.019                     | 265.2502  |
| 32   | 3      | 30     | 31    | 3       | 29      | E    | 1           | 170599.377   | -0.088                     | 271.6472  |
| 32   | 2      | 30     | 31    | 2       | 29      | E    | 1           | 170599.377   | -0.088                     | 271.6472  |
| 32   | 2      | 30     | 31    | 2       | 29      | E    | 0           | 170623.039   | -0.026                     | 155.3550  |
| 32   | 3      | 30     | 31    | 2       | 29      | E    | 0           | 170623.039   | -0.026                     | 155.3550  |
| 32   | 2      | 30     | 31    | 3       | 29      | E    | 0           | 170623.039   | -0.026                     | 155.3550  |
| 32   | 3      | 30     | 31    | 3       | 29      | E    | 0           | 170623.039   | -0.026                     | 155.3550  |
| 32   | 2      | 30     | 31    | 2       | 29      | A    | 0           | 170625.981   | -0.041                     | 155.3405  |
| 32   | 3      | 30     | 31    | 2       | 29      | A    | 0           | 170625.981   | -0.041                     | 155.3405  |
| 32   | 2      | 30     | 31    | 3       | 29      | A    | 0           | 170625.981   | -0.041                     | 155.3405  |
| 32   | 3      | 30     | 31    | 3       | 29      | A    | 0           | 170625.981   | -0.041                     | 155.3405  |
| 29   | 24     | 5      | 28    | 24      | 4       | A    | 0           | 170641.185   | 0.025                      | 255.5528  |



| $J'$ | $K'_a$ | $K'_c$ | $J''$ | $K''_a$ | $K''_c$ | Sym. | $v_{tCH_3}$ | $\nu_{Obs.}$ | $\nu_{Obs.} - \nu_{Calc.}$ | $E_{low}$ |
|------|--------|--------|-------|---------|---------|------|-------------|--------------|----------------------------|-----------|
| 29   | 24     | 6      | 28    | 24      | 5       | A    | 0           | 170641.185   | 0.025                      | 255.5528  |
| 29   | 24     | 6      | 28    | 24      | 5       | E    | 0           | 170641.185   | 0.007                      | 255.5331  |
| 30   | 4      | 26     | 29    | 4       | 25      | E    | 0           | 170656.378   | -0.027                     | 151.9284  |
| 30   | 4      | 26     | 29    | 4       | 25      | E    | 1           | 170658.848   | -0.137                     | 268.2273  |
| 30   | 4      | 26     | 29    | 4       | 25      | A    | 0           | 170662.299   | 0.040                      | 151.9150  |
| 29   | 22     | 8      | 28    | 22      | 7       | E    | 1           | 170673.506   | -0.063                     | 353.7651  |
| 29   | 22     | 7      | 28    | 22      | 6       | E    | 1           | 170682.613   | -0.031                     | 354.1175  |
| 33   | 1      | 32     | 32    | 1       | 31      | A    | 1           | 170688.467   | -0.110                     | 273.1687  |
| 33   | 2      | 32     | 32    | 1       | 31      | A    | 1           | 170688.467   | -0.110                     | 273.1687  |
| 33   | 1      | 32     | 32    | 2       | 31      | A    | 1           | 170688.467   | -0.110                     | 273.1687  |
| 33   | 2      | 32     | 32    | 2       | 31      | A    | 1           | 170688.467   | -0.110                     | 273.1687  |
| 29   | 22     | 7      | 28    | 22      | 6       | A    | 1           | 170690.009   | 0.214                      | 353.4822  |
| 29   | 22     | 8      | 28    | 22      | 7       | A    | 1           | 170690.009   | 0.214                      | 353.4822  |
| 29   | 23     | 6      | 28    | 23      | 5       | A    | 0           | 170708.418   | 0.047                      | 246.2346  |
| 29   | 23     | 7      | 28    | 23      | 6       | A    | 0           | 170708.418   | 0.047                      | 246.2346  |
| 29   | 23     | 7      | 28    | 23      | 6       | E    | 0           | 170708.418   | -0.059                     | 246.2146  |
| 33   | 2      | 32     | 32    | 2       | 31      | E    | 1           | 170746.078   | -0.076                     | 272.6733  |
| 33   | 1      | 32     | 32    | 2       | 31      | E    | 1           | 170746.078   | -0.076                     | 272.6733  |
| 33   | 2      | 32     | 32    | 1       | 31      | E    | 1           | 170746.078   | -0.076                     | 272.6733  |
| 33   | 1      | 32     | 32    | 1       | 31      | E    | 1           | 170746.078   | -0.076                     | 272.6733  |
| 29   | 21     | 9      | 28    | 21      | 8       | E    | 1           | 170758.868   | -0.046                     | 345.1990  |
| 29   | 21     | 8      | 28    | 21      | 7       | E    | 1           | 170766.568   | -0.046                     | 345.6113  |
| 29   | 21     | 9      | 28    | 21      | 8       | A    | 1           | 170777.677   | -0.011                     | 344.9841  |
| 29   | 21     | 8      | 28    | 21      | 7       | A    | 1           | 170777.677   | -0.011                     | 344.9841  |
| 33   | 1      | 32     | 32    | 1       | 31      | E    | 0           | 170779.688   | -0.019                     | 156.3889  |
| 33   | 2      | 32     | 32    | 1       | 31      | E    | 0           | 170779.688   | -0.019                     | 156.3889  |
| 33   | 1      | 32     | 32    | 2       | 31      | E    | 0           | 170779.688   | -0.019                     | 156.3889  |
| 33   | 2      | 32     | 32    | 2       | 31      | E    | 0           | 170779.688   | -0.019                     | 156.3889  |
| 33   | 1      | 32     | 32    | 1       | 31      | A    | 0           | 170781.501   | 0.034                      | 156.3734  |
| 33   | 2      | 32     | 32    | 1       | 31      | A    | 0           | 170781.501   | 0.034                      | 156.3734  |
| 33   | 1      | 32     | 32    | 2       | 31      | A    | 0           | 170781.501   | 0.034                      | 156.3734  |
| 33   | 2      | 32     | 32    | 2       | 31      | A    | 0           | 170781.501   | 0.034                      | 156.3734  |
| 29   | 22     | 7      | 28    | 22      | 6       | A    | 0           | 170784.298   | 0.133                      | 237.3150  |
| 29   | 22     | 8      | 28    | 22      | 7       | A    | 0           | 170784.298   | 0.133                      | 237.3150  |
| 29   | 22     | 8      | 28    | 22      | 7       | E    | 0           | 170784.298   | -0.078                     | 237.2951  |
| 30   | 5      | 26     | 29    | 4       | 25      | E    | 0           | 170812.118   | -0.247                     | 151.9284  |
| 30   | 5      | 26     | 29    | 4       | 25      | A    | 0           | 170818.974   | -0.078                     | 151.9150  |
| 30   | 5      | 26     | 29    | 4       | 25      | E    | 1           | 170821.683   | -0.064                     | 268.2273  |
| 28   | 15     | 13     | 28    | 14      | 14      | A    | 0           | 170856.896   | -1.891                     | 180.3968  |
| 28   | 15     | 14     | 28    | 14      | 15      | A    | 0           | 170856.896   | -1.891                     | 180.3968  |
| 29   | 20     | 10     | 28    | 20      | 9       | E    | 1           | 170856.896   | -0.053                     | 337.0338  |
| 29   | 20     | 9      | 28    | 20      | 8       | E    | 1           | 170862.628   | 0.001                      | 337.5002  |
| 29   | 21     | 8      | 28    | 21      | 7       | A    | 0           | 170870.486   | 0.200                      | 228.7946  |
| 29   | 21     | 9      | 28    | 21      | 8       | A    | 0           | 170870.486   | 0.200                      | 228.7946  |
| 29   | 21     | 9      | 28    | 21      | 8       | E    | 0           | 170870.486   | -0.132                     | 228.7749  |
| 29   | 20     | 9      | 28    | 20      | 8       | A    | 1           | 170878.516   | 0.224                      | 336.8899  |
| 29   | 20     | 10     | 28    | 20      | 9       | A    | 1           | 170878.516   | 0.224                      | 336.8899  |
| 34   | 0      | 34     | 33    | 0       | 33      | A    | 1           | 170900.428   | -0.037                     | 273.8163  |
| 34   | 1      | 34     | 33    | 0       | 33      | A    | 1           | 170900.428   | -0.037                     | 273.8163  |
| 34   | 0      | 34     | 33    | 1       | 33      | A    | 1           | 170900.428   | -0.037                     | 273.8163  |
| 34   | 1      | 34     | 33    | 1       | 33      | A    | 1           | 170900.428   | -0.037                     | 273.8163  |
| 34   | 1      | 34     | 33    | 1       | 33      | E    | 1           | 170916.939   | -0.082                     | 273.2802  |
| 34   | 0      | 34     | 33    | 1       | 33      | E    | 1           | 170916.939   | -0.082                     | 273.2802  |
| 34   | 1      | 34     | 33    | 0       | 33      | E    | 1           | 170916.939   | -0.082                     | 273.2802  |
| 34   | 0      | 34     | 33    | 0       | 33      | E    | 1           | 170916.939   | -0.082                     | 273.2802  |
| 34   | 0      | 34     | 33    | 0       | 33      | A    | 0           | 170961.250   | -0.232                     | 156.9896  |
| 34   | 1      | 34     | 33    | 0       | 33      | A    | 0           | 170961.250   | -0.232                     | 156.9896  |
| 34   | 0      | 34     | 33    | 1       | 33      | A    | 0           | 170961.250   | -0.232                     | 156.9896  |
| 34   | 1      | 34     | 33    | 1       | 33      | A    | 0           | 170961.250   | -0.232                     | 156.9896  |
| 34   | 0      | 34     | 33    | 0       | 33      | E    | 0           | 170961.250   | 0.272                      | 157.0063  |
| 34   | 1      | 34     | 33    | 0       | 33      | E    | 0           | 170961.250   | 0.272                      | 157.0063  |
| 34   | 0      | 34     | 33    | 1       | 33      | E    | 0           | 170961.250   | 0.272                      | 157.0063  |
| 34   | 1      | 34     | 33    | 1       | 33      | E    | 0           | 170961.250   | 0.272                      | 157.0063  |
| 29   | 20     | 9      | 28    | 20      | 8       | A    | 0           | 170969.185   | 0.247                      | 220.6738  |
| 29   | 20     | 10     | 28    | 20      | 9       | A    | 0           | 170969.185   | 0.247                      | 220.6738  |
| 29   | 20     | 10     | 28    | 20      | 9       | E    | 0           | 170969.185   | -0.228                     | 220.6547  |
| 42   | 4      | 38     | 42    | 3       | 39      | E    | 0           | 170986.907   | 0.055                      | 233.0355  |
| 42   | 5      | 38     | 42    | 3       | 39      | E    | 0           | 170986.907   | 0.055                      | 233.0355  |
| 42   | 5      | 38     | 42    | 4       | 39      | E    | 0           | 170986.907   | 0.055                      | 233.0355  |
| 42   | 4      | 38     | 42    | 3       | 39      | A    | 0           | 171018.880   | -0.011                     | 233.0234  |
| 42   | 5      | 38     | 42    | 3       | 39      | A    | 0           | 171018.880   | -0.011                     | 233.0234  |
| 42   | 5      | 38     | 42    | 4       | 39      | A    | 0           | 171018.880   | -0.011                     | 233.0234  |
| 29   | 19     | 10     | 28    | 19      | 9       | A    | 0           | 171083.297   | 0.351                      | 212.9533  |
| 29   | 19     | 11     | 28    | 19      | 10      | A    | 0           | 171083.297   | 0.351                      | 212.9533  |
| 29   | 19     | 11     | 28    | 19      | 10      | E    | 0           | 171083.297   | -0.291                     | 212.9350  |
| 29   | 18     | 12     | 28    | 18      | 11      | E    | 1           | 171102.926   | -0.047                     | 321.9111  |
| 29   | 18     | 11     | 28    | 18      | 10      | E    | 1           | 171102.926   | -0.047                     | 322.4652  |
| 29   | 18     | 11     | 28    | 18      | 10      | A    | 1           | 171129.939   | 0.085                      | 321.9143  |
| 29   | 18     | 12     | 28    | 18      | 11      | A    | 1           | 171129.939   | 0.085                      | 321.9143  |
| 28   | 8      | 20     | 27    | 8       | 19      | E    | 1           | 171145.402   | -0.108                     | 266.1371  |
| 16   | 7      | 9      | 15    | 6       | 10      | E    | 0           | 171152.486   | 0.365                      | 92.4566   |
| 29   | 18     | 11     | 28    | 18      | 10      | A    | 0           | 171216.453   | 0.469                      | 205.6340  |
| 29   | 18     | 12     | 28    | 18      | 11      | A    | 0           | 171216.453   | 0.469                      | 205.6340  |
| 29   | 18     | 11     | 28    | 18      | 10      | E    | 0           | 171216.453   | -0.370                     | 205.6341  |
| 29   | 18     | 12     | 28    | 18      | 11      | E    | 0           | 171216.453   | -0.370                     | 205.6168  |
| 29   | 17     | 12     | 28    | 17      | 11      | E    | 1           | 171254.655   | 0.011                      | 315.5430  |
| 29   | 17     | 13     | 28    | 17      | 12      | E    | 1           | 171260.457   | -0.048                     | 314.9566  |
| 50   | 8      | 42     | 50    | 7       | 43      | E    | 1           | 171281.797   | -0.189                     | 441.4764  |
| 29   | 17     | 12     | 28    | 17      | 11      | A    | 1           | 171289.482   | 0.090                      | 315.0339  |
| 29   | 17     | 13     | 28    | 17      | 12      | A    | 1           | 171289.482   | 0.090                      | 315.0339  |
| 50   | 9      | 42     | 50    | 8       | 43      | E    | 1           | 171349.292   | -0.363                     | 441.4766  |
| 29   | 17     | 12     | 28    | 17      | 11      | A    | 0           | 171372.923   | 0.019                      | 198.7170  |
| 29   | 17     | 13     | 28    | 17      | 12      | A    | 0           | 171372.923   | 0.019                      | 198.7170  |
| 29   | 17     | 12     | 28    | 17      | 11      | E    | 0           | 171374.027   | 0.131                      | 198.7194  |
| 29   | 17     | 13     | 28    | 17      | 12      | E    | 0           | 171374.027   | 0.131                      | 198.7011  |
| 14   | 8      | 7      | 13    | 7       | 7       | E    | 0           | 171396.998   | 0.464                      | 89.2323   |
| 43   | 11     | 32     | 42    | 12      | 31      | E    | 0           | 171404.741   | -0.032                     | 270.0814  |
| 29   | 16     | 13     | 28    | 16      | 12      | E    | 1           | 171436.204   | 0.138                      | 309.0195  |
| 14   | 8      | 6      | 13    | 7       | 6       | E    | 0           | 171442.204   | 0.016                      | 89.2467   |
| 29   | 16     | 14     | 28    | 16      | 13      | E    | 1           | 171448.427   | -0.097                     | 308.4091  |
| 32   | 14     | 19     | 31    | 14      | 17      | E    | 1           | 171448.427   | -0.097                     | 314.9903  |
| 14   | 8      | 7      | 13    | 7       | 6       | A    | 0           | 171464.650   | -0.163                     | 89.2276   |
| 14   | 8      | 6      | 13    | 7       | 7       | A    | 0           | 171466.624   | -0.145                     | 89.2275   |
| 29   | 16     | 13     | 28    | 16      | 12      | A    | 1           | 171479.694   | 0.033                      | 308.5596  |
| 29   | 16     | 14     | 28    | 16      | 13      | A    | 1           | 171479.694   | 0.033                      | 308.5596  |
| 29   | 16     | 13     | 28    | 16      | 12      | A    | 0           | 171560.278   | 0.026                      | 192.2036  |
| 29   | 16     | 14     | 28    | 16      | 13      | A    | 0           | 171560.278   | 0.026                      | 192.2036  |
| 29   | 16     | 13     | 28    | 16      | 12      | E    | 0           | 171561.548   | 0.131                      | 192.2084  |
| 29   | 16     | 14     | 28    | 16      | 13      | E    | 0           | 171561.548   | 0.131                      | 192.1893  |
| 16   | 4      | 12     | 15    | 2       | 13      | E    | 1           | 171573.537   | 0.232                      | 202.9935  |
| 29   | 5      | 24     | 28    | 5       | 23      | A    | 1           | 171615.588   | -0.090                     | 266.0819  |
| 29   | 15     | 14     | 28    | 15      | 13      | E    | 1           | 171655.456   | -0.015                     | 302.8965  |
| 12   | 9      | 4      | 11    | 8       | 4       | E    | 0           | 171660.924   | 0.022                      | 87.2645   |
| 29   | 15     | 15     | 28    | 15      | 14      | E    | 1           | 171676.511   | 0.039                      | 302.2711  |
| 37   | 2      | 36     | 37    | 1       | 37      | E    | 1           | 171682.496   | -0.467                     | 297.0767  |
| 37   | 1      | 36     | 37    | 1       | 37      | E    | 1           | 171682.496   | -0.467                     | 297.0767  |

| $J'$ | $K'_a$ | $K'_c$ | $J''$ | $K''_a$ | $K''_c$ | Sym. | $v_{tCH_3}$ | $\nu_{Obs.}$ | $\nu_{Obs.} - \nu_{Calc.}$ | $E_{low}$ |
|------|--------|--------|-------|---------|---------|------|-------------|--------------|----------------------------|-----------|
| 37   | 2      | 36     | 37    | 0       | 37      | E    | 1           | 171682.496   | -0.467                     | 297.0767  |
| 37   | 1      | 36     | 37    | 0       | 37      | E    | 1           | 171682.496   | -0.467                     | 297.0767  |
| 12   | 9      | 3      | 11    | 8       | 3       | E    | 0           | 171699.370   | 0.001                      | 87.2805   |
| 29   | 15     | 15     | 28    | 15      | 14      | A    | 1           | 171709.810   | 0.039                      | 302.4929  |
| 29   | 15     | 14     | 28    | 15      | 13      | A    | 1           | 171709.810   | 0.039                      | 302.4929  |
| 12   | 9      | 4      | 11    | 8       | 3       | A    | 0           | 171730.816   | 0.076                      | 87.2621   |
| 12   | 9      | 3      | 11    | 8       | 4       | A    | 0           | 171730.816   | 0.076                      | 87.2621   |
| 44   | 5      | 39     | 44    | 4       | 40      | E    | 0           | 171754.099   | 0.110                      | 254.5662  |
| 44   | 6      | 39     | 44    | 4       | 40      | A    | 0           | 171782.646   | 0.007                      | 254.5554  |
| 44   | 6      | 39     | 44    | 5       | 40      | A    | 0           | 171782.646   | 0.007                      | 254.5554  |
| 29   | 15     | 14     | 28    | 15      | 13      | A    | 0           | 171787.046   | -0.017                     | 186.0960  |
| 29   | 15     | 15     | 28    | 15      | 14      | A    | 0           | 171787.046   | -0.017                     | 186.0960  |
| 29   | 15     | 14     | 28    | 15      | 13      | E    | 0           | 171788.479   | 0.052                      | 186.1030  |
| 29   | 15     | 15     | 28    | 15      | 14      | E    | 0           | 171788.479   | 0.052                      | 186.0834  |
| 10   | 10     | 1      | 9     | 9       | 1       | E    | 0           | 171821.805   | 0.337                      | 86.5094   |
| 10   | 10     | 0      | 9     | 9       | 0       | E    | 0           | 171853.129   | 0.435                      | 86.5267   |
| 29   | 5      | 24     | 28    | 5       | 23      | E    | 0           | 171882.931   | -0.130                     | 149.3559  |
| 10   | 10     | 1      | 9     | 9       | 0       | A    | 0           | 171891.401   | 0.178                      | 86.5094   |
| 10   | 10     | 0      | 9     | 9       | 1       | A    | 0           | 171891.401   | 0.178                      | 86.5094   |
| 29   | 5      | 24     | 28    | 5       | 23      | A    | 0           | 171893.205   | -0.056                     | 149.3423  |
| 29   | 5      | 24     | 28    | 5       | 23      | E    | 1           | 171922.864   | -0.189                     | 265.6498  |
| 29   | 14     | 15     | 28    | 14      | 14      | E    | 1           | 171925.167   | 0.015                      | 297.1770  |
| 29   | 14     | 16     | 28    | 14      | 15      | E    | 1           | 171957.685   | 0.029                      | 296.5457  |
| 30   | 25     | 6      | 29    | 25      | 4       | E    | 1           | 171986.878   | -0.083                     | 387.6915  |
| 29   | 14     | 16     | 28    | 14      | 15      | A    | 1           | 171992.679   | -0.010                     | 296.8359  |
| 29   | 14     | 15     | 28    | 14      | 14      | A    | 1           | 171992.679   | -0.010                     | 296.8359  |
| 29   | 14     | 15     | 28    | 14      | 14      | A    | 0           | 172066.195   | 0.010                      | 180.3968  |
| 29   | 14     | 16     | 28    | 14      | 15      | A    | 0           | 172066.195   | 0.010                      | 180.3968  |
| 29   | 14     | 16     | 28    | 14      | 15      | E    | 0           | 172068.236   | -0.041                     | 180.3861  |
| 46   | 6      | 40     | 46    | 5       | 41      | A    | 0           | 172140.192   | 0.236                      | 277.0992  |
| 46   | 7      | 40     | 46    | 5       | 41      | A    | 0           | 172144.032   | 0.379                      | 277.0992  |
| 46   | 7      | 40     | 46    | 6       | 41      | A    | 0           | 172144.032   | 0.379                      | 277.0992  |
| 46   | 6      | 40     | 46    | 6       | 41      | E    | 1           | 172146.889   | -0.209                     | 393.4008  |
| 46   | 6      | 40     | 46    | 5       | 41      | E    | 1           | 172146.889   | -0.209                     | 393.4008  |
| 46   | 7      | 40     | 46    | 6       | 41      | E    | 1           | 172151.008   | -0.216                     | 393.4008  |
| 46   | 7      | 40     | 46    | 5       | 41      | E    | 1           | 172151.008   | -0.216                     | 393.4008  |
| 29   | 13     | 16     | 28    | 13      | 15      | E    | 1           | 172263.165   | -0.008                     | 291.8647  |
| 29   | 13     | 17     | 28    | 13      | 16      | E    | 1           | 172311.396   | 0.002                      | 291.2372  |
| 29   | 13     | 17     | 28    | 13      | 16      | A    | 1           | 172347.562   | -0.011                     | 291.5919  |
| 29   | 13     | 16     | 28    | 13      | 15      | A    | 1           | 172347.562   | -0.011                     | 291.5919  |
| 28   | 8      | 20     | 27    | 8       | 19      | A    | 0           | 172405.207   | 0.108                      | 149.6545  |
| 28   | 8      | 20     | 27    | 8       | 19      | E    | 0           | 172410.698   | 0.070                      | 149.6664  |
| 29   | 13     | 16     | 28    | 13      | 15      | A    | 0           | 172416.627   | 0.052                      | 175.1098  |
| 29   | 13     | 17     | 28    | 13      | 16      | A    | 0           | 172416.627   | 0.052                      | 175.1098  |
| 29   | 13     | 17     | 28    | 13      | 16      | E    | 0           | 172416.627   | 0.124                      | 175.1013  |
| 28   | 8      | 20     | 27    | 8       | 19      | A    | 1           | 172456.705   | -0.111                     | 266.3517  |
| 29   | 12     | 17     | 28    | 12      | 16      | E    | 1           | 172697.288   | -0.108                     | 286.9655  |
| 29   | 12     | 18     | 28    | 12      | 17      | E    | 1           | 172767.912   | 0.043                      | 286.3516  |
| 29   | 12     | 18     | 28    | 12      | 17      | A    | 1           | 172804.183   | -0.020                     | 286.7662  |
| 29   | 12     | 17     | 28    | 12      | 16      | A    | 1           | 172804.183   | -0.020                     | 286.7662  |
| 29   | 12     | 17     | 28    | 12      | 16      | A    | 0           | 172867.679   | 0.030                      | 170.2409  |
| 29   | 12     | 18     | 28    | 12      | 17      | A    | 0           | 172867.679   | 0.030                      | 170.2409  |
| 29   | 12     | 17     | 28    | 12      | 16      | E    | 0           | 172868.690   | -0.072                     | 170.2541  |
| 29   | 12     | 18     | 28    | 12      | 17      | E    | 0           | 172871.048   | 0.067                      | 170.2347  |
| 19   | 5      | 15     | 18    | 4       | 15      | E    | 0           | 173207.037   | -0.260                     | 98.5369   |
| 29   | 11     | 18     | 28    | 11      | 17      | E    | 1           | 173273.968   | 0.066                      | 282.4882  |
| 29   | 11     | 19     | 28    | 11      | 18      | E    | 1           | 173377.798   | 0.095                      | 281.8986  |
| 29   | 11     | 19     | 28    | 11      | 18      | A    | 1           | 173407.706   | 0.026                      | 282.3671  |
| 18   | 6      | 12     | 17    | 5       | 13      | A    | 0           | 173415.926   | -0.467                     | 96.9239   |
| 29   | 11     | 18     | 28    | 11      | 17      | A    | 1           | 173417.175   | 0.030                      | 282.3674  |
| 29   | 11     | 19     | 28    | 11      | 18      | A    | 0           | 173464.229   | 0.105                      | 165.7989  |
| 29   | 11     | 18     | 28    | 11      | 17      | E    | 0           | 173469.693   | 0.052                      | 165.8139  |
| 29   | 11     | 18     | 28    | 11      | 17      | A    | 0           | 173472.881   | -0.002                     | 165.7992  |
| 29   | 11     | 19     | 28    | 11      | 18      | E    | 0           | 173472.881   | 0.133                      | 165.7953  |
| 41   | 3      | 38     | 41    | 2       | 39      | A    | 1           | 173677.973   | -0.010                     | 336.4188  |
| 41   | 4      | 38     | 41    | 2       | 39      | A    | 1           | 173677.973   | -0.010                     | 336.4188  |
| 41   | 3      | 38     | 41    | 3       | 39      | A    | 1           | 173677.973   | -0.010                     | 336.4188  |
| 41   | 4      | 38     | 41    | 3       | 39      | A    | 1           | 173677.973   | -0.010                     | 336.4188  |
| 30   | 5      | 25     | 29    | 6       | 24      | A    | 1           | 173706.990   | -0.442                     | 271.8894  |
| 30   | 5      | 25     | 29    | 6       | 24      | E    | 1           | 173728.338   | 0.081                      | 271.4765  |
| 30   | 5      | 25     | 29    | 6       | 24      | A    | 0           | 173771.229   | 0.009                      | 155.1657  |
| 30   | 5      | 25     | 29    | 6       | 24      | E    | 0           | 173773.327   | 0.079                      | 155.1786  |
| 29   | 7      | 23     | 28    | 7       | 22      | A    | 1           | 173923.028   | -0.092                     | 269.0253  |
| 45   | 16     | 30     | 45    | 15      | 31      | A    | 0           | 173995.181   | -0.465                     | 311.3721  |
| 29   | 7      | 23     | 28    | 7       | 22      | E    | 0           | 174071.508   | 0.087                      | 152.3248  |
| 29   | 7      | 23     | 28    | 7       | 22      | A    | 0           | 174073.927   | 0.103                      | 152.3124  |
| 29   | 10     | 19     | 28    | 10      | 18      | E    | 1           | 174078.423   | 0.087                      | 278.4475  |
| 29   | 6      | 24     | 28    | 5       | 23      | A    | 1           | 174105.100   | 0.041                      | 266.0819  |
| 29   | 10     | 20     | 28    | 10      | 19      | A    | 1           | 174211.124   | -0.056                     | 278.4078  |
| 29   | 10     | 20     | 28    | 10      | 19      | E    | 1           | 174236.522   | 0.075                      | 277.8938  |
| 29   | 7      | 23     | 28    | 7       | 22      | E    | 1           | 174244.265   | 0.057                      | 268.6080  |
| 29   | 10     | 20     | 28    | 10      | 19      | A    | 0           | 174260.029   | 0.056                      | 161.7975  |
| 29   | 10     | 20     | 28    | 10      | 19      | E    | 0           | 174302.223   | 0.050                      | 161.7980  |
| 29   | 10     | 19     | 28    | 10      | 18      | A    | 1           | 174321.383   | -0.069                     | 278.4116  |
| 29   | 10     | 19     | 28    | 10      | 18      | E    | 0           | 174327.541   | 0.107                      | 161.8158  |
| 28   | 6      | 22     | 27    | 6       | 21      | A    | 1           | 174357.004   | -0.056                     | 262.5394  |
| 29   | 10     | 19     | 28    | 10      | 18      | A    | 0           | 174362.951   | 0.107                      | 161.8011  |
| 28   | 6      | 22     | 27    | 6       | 21      | E    | 1           | 174556.431   | -0.268                     | 262.0853  |
| 29   | 6      | 24     | 28    | 5       | 23      | E    | 0           | 174560.502   | -0.137                     | 149.3559  |
| 29   | 6      | 24     | 28    | 5       | 23      | A    | 0           | 174582.098   | -0.134                     | 149.3423  |
| 28   | 6      | 22     | 27    | 6       | 21      | E    | 0           | 174610.985   | 0.002                      | 145.7987  |
| 28   | 6      | 22     | 27    | 6       | 21      | A    | 0           | 174619.296   | -0.007                     | 145.7841  |
| 41   | 3      | 38     | 41    | 2       | 39      | E    | 0           | 174661.603   | -0.170                     | 219.7052  |
| 41   | 4      | 38     | 41    | 2       | 39      | E    | 0           | 174661.603   | -0.170                     | 219.7052  |
| 41   | 4      | 38     | 41    | 3       | 39      | E    | 0           | 174661.603   | -0.170                     | 219.7052  |
| 29   | 6      | 24     | 28    | 5       | 23      | E    | 1           | 174678.017   | -0.502                     | 265.6498  |
| 41   | 3      | 38     | 41    | 2       | 39      | A    | 0           | 174698.588   | -0.142                     | 219.6916  |
| 41   | 4      | 38     | 41    | 2       | 39      | A    | 0           | 174698.588   | -0.142                     | 219.6916  |
| 41   | 3      | 38     | 41    | 3       | 39      | A    | 0           | 174698.588   | -0.142                     | 219.6916  |
| 41   | 4      | 38     | 41    | 3       | 39      | A    | 0           | 174698.588   | -0.142                     | 219.6916  |
| 29   | 10     | 19     | 28    | 10      | 19      | E    | 0           | 174862.028   | 0.087                      | 161.7980  |
| 41   | 4      | 38     | 41    | 3       | 39      | E    | 1           | 174876.380   | 0.494                      | 335.9871  |
| 41   | 3      | 38     | 41    | 3       | 39      | E    | 1           | 174876.380   | 0.494                      | 335.9871  |
| 41   | 4      | 38     | 41    | 2       | 39      | E    | 1           | 174876.380   | 0.494                      | 335.9871  |
| 41   | 3      | 38     | 41    | 2       | 39      | E    | 1           | 174876.380   | 0.494                      | 335.9871  |
| 43   | 4      | 39     | 43    | 3       | 40      | A    | 1           | 174922.972   | 0.280                      | 357.3752  |
| 43   | 5      | 39     | 43    | 3       | 40      | A    | 1           | 174922.972   | 0.280                      | 357.3752  |
| 43   | 5      | 39     | 43    | 4       | 40      | A    | 1           | 174922.972   | 0.280                      | 357.3752  |
| 29   | 9      | 21     | 28    | 9       | 20      | A    | 1           | 175125.334   | -0.062                     | 274.9021  |
| 29   | 9      | 21     | 28    | 9       | 20      | A    | 0           | 175175.899   | -0.006                     | 158.2515  |
| 29   | 9      | 21     | 28    | 9       | 20      | E    | 0           | 175200.189   | 0.110                      | 158.2594  |
| 31   | 4      | 27     | 30    | 5       | 26      | A    | 1           | 175222.963   | -0.429                     | 274.3450  |
| 30   | 6      | 25     | 29    | 6       | 24      | A    | 1           | 175266.861   | -0.076                     | 271.8894  |
| 31   | 5      | 27     | 30    | 5       | 26      | A    | 1           | 175304.808   | -0.089                     | 274.3450  |
| 32   | 3      | 29     | 31    | 4       | 28      | A    | 1           | 175322.080   | -0.153                     | 276.3030  |
| 32   | 4      | 29     | 31    | 4       | 28      | A    | 1           | 175324.709   | -0.049                     | 276.3030  |

| $J'$ | $K'_a$ | $K'_c$ | $J''$ | $K''_a$ | $K''_c$ | Sym. | $v_{tCH_3}$ | $\nu_{Obs.}$ | $\nu_{Obs.} - \nu_{Calc.}$ | $E_{low}$ |
|------|--------|--------|-------|---------|---------|------|-------------|--------------|----------------------------|-----------|
| 32   | 3      | 29     | 31    | 3       | 28      | A    | 1           | 175326.863   | -0.058                     | 276.3029  |
| 32   | 4      | 29     | 31    | 3       | 28      | A    | 1           | 175329.465   | 0.020                      | 276.3029  |
| 29   | 9      | 20     | 28    | 9       | 19      | E    | 1           | 175338.165   | 0.041                      | 274.8707  |
| 31   | 4      | 27     | 30    | 4       | 26      | A    | 1           | 175365.614   | -0.062                     | 274.3402  |
| 31   | 4      | 27     | 30    | 5       | 26      | E    | 1           | 175385.294   | -0.083                     | 273.9253  |
| 31   | 4      | 27     | 30    | 5       | 26      | E    | 0           | 175392.990   | -0.094                     | 157.6261  |
| 31   | 4      | 27     | 30    | 5       | 26      | A    | 0           | 175397.832   | -0.078                     | 157.6129  |
| 31   | 5      | 27     | 30    | 4       | 26      | A    | 1           | 175447.257   | 0.077                      | 274.3402  |
| 29   | 8      | 22     | 28    | 8       | 21      | A    | 1           | 175452.702   | -0.047                     | 271.8259  |
| 33   | 2      | 31     | 32    | 2       | 30      | A    | 1           | 175455.565   | -0.050                     | 277.7979  |
| 33   | 3      | 31     | 32    | 2       | 30      | A    | 1           | 175455.565   | -0.050                     | 277.7979  |
| 33   | 2      | 31     | 32    | 3       | 30      | A    | 1           | 175455.565   | -0.050                     | 277.7979  |
| 33   | 3      | 31     | 32    | 3       | 30      | A    | 1           | 175455.565   | -0.050                     | 277.7979  |
| 30   | 6      | 25     | 29    | 6       | 24      | E    | 0           | 175459.119   | 0.020                      | 155.1786  |
| 32   | 4      | 29     | 31    | 4       | 28      | E    | 1           | 175459.127   | -0.098                     | 275.8677  |
| 32   | 3      | 29     | 31    | 3       | 28      | E    | 1           | 175461.687   | -0.058                     | 275.8675  |
| 30   | 6      | 25     | 29    | 6       | 24      | A    | 0           | 175464.696   | -0.055                     | 155.1657  |
| 32   | 4      | 29     | 31    | 3       | 28      | E    | 1           | 175464.702   | -0.038                     | 275.8675  |
| 32   | 3      | 29     | 31    | 4       | 28      | E    | 0           | 175471.401   | -0.088                     | 159.5708  |
| 30   | 6      | 25     | 29    | 6       | 24      | E    | 1           | 175471.403   | -0.079                     | 271.4765  |
| 32   | 4      | 29     | 31    | 4       | 28      | E    | 0           | 175474.164   | -0.153                     | 159.5708  |
| 32   | 3      | 29     | 31    | 3       | 28      | E    | 0           | 175476.663   | -0.053                     | 159.5706  |
| 32   | 4      | 29     | 31    | 4       | 28      | A    | 0           | 175478.547   | 0.099                      | 159.5572  |
| 32   | 3      | 29     | 31    | 3       | 28      | A    | 0           | 175480.866   | 0.004                      | 159.5570  |
| 31   | 5      | 27     | 30    | 5       | 26      | E    | 0           | 175482.760   | -0.068                     | 157.6261  |
| 31   | 5      | 27     | 30    | 5       | 26      | A    | 0           | 175488.164   | 0.007                      | 157.6129  |
| 29   | 9      | 21     | 28    | 9       | 20      | E    | 1           | 175528.767   | 0.195                      | 274.3667  |
| 29   | 8      | 22     | 28    | 8       | 21      | A    | 0           | 175538.946   | 0.010                      | 155.1396  |
| 29   | 8      | 22     | 28    | 8       | 21      | E    | 0           | 175542.249   | 0.073                      | 155.1506  |
| 31   | 4      | 27     | 30    | 4       | 26      | E    | 0           | 175548.986   | -0.058                     | 157.6209  |
| 33   | 3      | 31     | 32    | 3       | 30      | E    | 1           | 175551.549   | -0.060                     | 277.3378  |
| 33   | 2      | 31     | 32    | 2       | 30      | E    | 1           | 175551.549   | -0.060                     | 277.3378  |
| 31   | 4      | 27     | 30    | 4       | 26      | A    | 0           | 175554.660   | -0.043                     | 157.6077  |
| 33   | 2      | 31     | 32    | 2       | 30      | E    | 0           | 175576.840   | -0.026                     | 161.0464  |
| 33   | 3      | 31     | 32    | 2       | 30      | E    | 0           | 175576.840   | -0.026                     | 161.0464  |
| 33   | 2      | 31     | 32    | 3       | 30      | E    | 0           | 175576.840   | -0.026                     | 161.0464  |
| 33   | 3      | 31     | 32    | 3       | 30      | E    | 0           | 175576.840   | -0.026                     | 161.0464  |
| 33   | 2      | 31     | 32    | 2       | 30      | A    | 0           | 175579.780   | -0.028                     | 161.0320  |
| 33   | 3      | 31     | 32    | 2       | 30      | A    | 0           | 175579.780   | -0.028                     | 161.0320  |
| 33   | 2      | 31     | 32    | 3       | 30      | A    | 0           | 175579.780   | -0.028                     | 161.0320  |
| 33   | 3      | 31     | 32    | 3       | 30      | A    | 0           | 175579.780   | -0.028                     | 161.0320  |
| 31   | 5      | 27     | 30    | 4       | 26      | E    | 0           | 175638.292   | -0.496                     | 157.6209  |
| 34   | 1      | 33     | 33    | 1       | 32      | A    | 1           | 175643.487   | -0.085                     | 278.8622  |
| 34   | 2      | 33     | 33    | 1       | 32      | A    | 1           | 175643.487   | -0.085                     | 278.8622  |
| 34   | 1      | 33     | 33    | 2       | 32      | A    | 1           | 175643.487   | -0.085                     | 278.8622  |
| 34   | 2      | 33     | 33    | 2       | 32      | A    | 1           | 175643.487   | -0.085                     | 278.8622  |
| 31   | 5      | 27     | 30    | 4       | 26      | A    | 0           | 175645.223   | 0.272                      | 157.6077  |
| 34   | 2      | 33     | 33    | 2       | 32      | E    | 1           | 175700.815   | -0.128                     | 278.3688  |
| 34   | 1      | 33     | 33    | 1       | 32      | E    | 1           | 175700.815   | -0.128                     | 278.3688  |
| 49   | 13     | 36     | 48    | 14      | 35      | A    | 0           | 175713.695   | -0.188                     | 334.5908  |
| 34   | 1      | 33     | 33    | 1       | 32      | E    | 0           | 175735.945   | -0.071                     | 162.0855  |
| 34   | 2      | 33     | 33    | 1       | 32      | E    | 0           | 175735.945   | -0.071                     | 162.0855  |
| 34   | 1      | 33     | 33    | 2       | 32      | E    | 0           | 175735.945   | -0.071                     | 162.0855  |
| 34   | 2      | 33     | 33    | 2       | 32      | E    | 0           | 175735.945   | -0.071                     | 162.0855  |
| 34   | 1      | 33     | 33    | 1       | 32      | A    | 0           | 175737.764   | -0.006                     | 162.0701  |
| 34   | 2      | 33     | 33    | 1       | 32      | A    | 0           | 175737.764   | -0.006                     | 162.0701  |
| 34   | 1      | 33     | 33    | 2       | 32      | A    | 0           | 175737.764   | -0.006                     | 162.0701  |
| 34   | 2      | 33     | 33    | 2       | 32      | A    | 0           | 175737.764   | -0.006                     | 162.0701  |
| 28   | 7      | 21     | 27    | 7       | 20      | E    | 1           | 175796.671   | -0.074                     | 263.7934  |
| 43   | 16     | 27     | 43    | 15      | 28      | E    | 0           | 175818.749   | -0.091                     | 293.5214  |
| 43   | 16     | 28     | 43    | 15      | 29      | E    | 0           | 175824.077   | -0.477                     | 293.5027  |
| 43   | 4      | 39     | 43    | 3       | 40      | E    | 0           | 175830.908   | 0.053                      | 240.7050  |
| 43   | 5      | 39     | 43    | 3       | 40      | E    | 0           | 175830.908   | 0.053                      | 240.7050  |
| 43   | 5      | 39     | 43    | 4       | 40      | E    | 0           | 175830.908   | 0.053                      | 240.7050  |
| 35   | 0      | 35     | 34    | 0       | 34      | A    | 1           | 175856.033   | -0.008                     | 279.5169  |
| 35   | 1      | 35     | 34    | 0       | 34      | A    | 1           | 175856.033   | -0.008                     | 279.5169  |
| 35   | 0      | 35     | 34    | 1       | 34      | A    | 1           | 175856.033   | -0.008                     | 279.5169  |
| 35   | 1      | 35     | 34    | 1       | 34      | A    | 1           | 175856.033   | -0.008                     | 279.5169  |
| 43   | 4      | 39     | 43    | 3       | 40      | A    | 0           | 175863.908   | 0.020                      | 240.6930  |
| 43   | 5      | 39     | 43    | 3       | 40      | A    | 0           | 175863.908   | 0.020                      | 240.6930  |
| 43   | 5      | 39     | 43    | 4       | 40      | A    | 0           | 175863.908   | 0.020                      | 240.6930  |
| 35   | 1      | 35     | 34    | 1       | 34      | E    | 1           | 175872.332   | -0.129                     | 278.9814  |
| 35   | 0      | 35     | 34    | 0       | 34      | E    | 1           | 175872.332   | -0.129                     | 278.9814  |
| 35   | 0      | 35     | 34    | 0       | 34      | A    | 0           | 175918.121   | -0.249                     | 162.6922  |
| 35   | 1      | 35     | 34    | 0       | 34      | A    | 0           | 175918.121   | -0.249                     | 162.6922  |
| 35   | 0      | 35     | 34    | 1       | 34      | A    | 0           | 175918.121   | -0.249                     | 162.6922  |
| 35   | 1      | 35     | 34    | 1       | 34      | A    | 0           | 175918.121   | -0.249                     | 162.6922  |
| 35   | 0      | 35     | 34    | 0       | 34      | E    | 0           | 175918.121   | 0.252                      | 162.7089  |
| 35   | 1      | 35     | 34    | 0       | 34      | E    | 0           | 175918.121   | 0.252                      | 162.7089  |
| 35   | 0      | 35     | 34    | 1       | 34      | E    | 0           | 175918.121   | 0.252                      | 162.7089  |
| 35   | 1      | 35     | 34    | 1       | 34      | E    | 0           | 175918.121   | 0.252                      | 162.7089  |
| 43   | 5      | 39     | 43    | 4       | 40      | E    | 1           | 175988.902   | -0.428                     | 356.9918  |
| 43   | 4      | 39     | 43    | 4       | 40      | E    | 1           | 175988.902   | -0.428                     | 356.9918  |
| 43   | 5      | 39     | 43    | 3       | 40      | E    | 1           | 175988.902   | -0.428                     | 356.9918  |
| 43   | 4      | 39     | 43    | 3       | 40      | E    | 1           | 175988.902   | -0.428                     | 356.9918  |
| 29   | 9      | 20     | 28    | 9       | 19      | E    | 0           | 176022.157   | 0.076                      | 158.3004  |
| 29   | 9      | 20     | 28    | 9       | 19      | A    | 0           | 176037.025   | 0.094                      | 158.2891  |
| 29   | 9      | 20     | 28    | 9       | 19      | A    | 1           | 176037.036   | -0.206                     | 274.9421  |
| 30   | 5      | 25     | 29    | 5       | 24      | A    | 1           | 176196.672   | -0.142                     | 271.8063  |
| 30   | 29     | 1      | 29    | 29      | 0       | A    | 0           | 176301.690   | -0.413                     | 313.7970  |
| 30   | 29     | 2      | 29    | 29      | 1       | A    | 0           | 176301.690   | -0.413                     | 313.7970  |
| 30   | 29     | 2      | 29    | 29      | 1       | E    | 0           | 176301.690   | -0.442                     | 313.7778  |
| 28   | 7      | 21     | 27    | 7       | 20      | A    | 1           | 176304.207   | -0.136                     | 264.1954  |
| 28   | 7      | 21     | 27    | 7       | 20      | A    | 0           | 176342.671   | 0.060                      | 147.4559  |
| 30   | 28     | 2      | 29    | 28      | 1       | A    | 0           | 176346.747   | 0.032                      | 302.4912  |
| 30   | 28     | 3      | 29    | 28      | 2       | A    | 0           | 176346.747   | 0.032                      | 302.4912  |
| 28   | 7      | 21     | 27    | 7       | 20      | E    | 0           | 176346.747   | -0.196                     | 147.4697  |
| 30   | 27     | 3      | 29    | 27      | 2       | A    | 0           | 176395.332   | -0.176                     | 291.5828  |
| 30   | 27     | 4      | 29    | 27      | 3       | A    | 0           | 176395.332   | -0.176                     | 291.5828  |
| 30   | 27     | 4      | 29    | 27      | 3       | E    | 0           | 176395.332   | -0.342                     | 291.5655  |
| 17   | 7      | 11     | 16    | 6       | 11      | E    | 0           | 176397.876   | 0.022                      | 95.6495   |
| 30   | 25     | 5      | 29    | 25      | 4       | E    | 1           | 176406.962   | -0.451                     | 387.6915  |
| 29   | 8      | 22     | 28    | 8       | 21      | E    | 1           | 176434.074   | 0.102                      | 271.3494  |
| 30   | 26     | 4      | 29    | 26      | 3       | A    | 0           | 176448.976   | -0.202                     | 281.0721  |
| 30   | 26     | 5      | 29    | 26      | 4       | A    | 0           | 176448.976   | -0.202                     | 281.0721  |
| 30   | 26     | 5      | 29    | 26      | 4       | E    | 0           | 176448.976   | -0.105                     | 281.0538  |
| 30   | 5      | 25     | 29    | 5       | 24      | E    | 0           | 176450.796   | -0.030                     | 155.0893  |
| 30   | 5      | 25     | 29    | 5       | 24      | A    | 0           | 176460.149   | -0.041                     | 155.0760  |
| 13   | 9      | 5      | 12    | 8       | 4       | A    | 1           | 176472.522   | 0.165                      | 206.3346  |
| 13   | 9      | 4      | 12    | 8       | 5       | A    | 1           | 176472.522   | 0.165                      | 206.3346  |
| 30   | 24     | 6      | 29    | 24      | 5       | A    | 1           | 176474.433   | 0.035                      | 377.3778  |
| 30   | 24     | 7      | 29    | 24      | 6       | A    | 1           | 176474.433   | 0.035                      | 377.3778  |
| 30   | 5      | 25     | 29    | 5       | 24      | E    | 1           | 176483.658   | -0.065                     | 271.3846  |
| 30   | 25     | 5      | 29    | 25      | 4       | A    | 0           | 176508.494   | -0.067                     | 270.9593  |
| 30   | 25     | 6      | 29    | 25      | 5       | A    | 0           | 176508.494   | -0.067                     | 270.9593  |
| 30   | 25     | 6      | 29    | 25      | 5       | E    | 0           | 176508.494   | -0.037                     | 270.9402  |

| $J'$ | $K'_a$ | $K'_c$ | $J''$ | $K''_a$ | $K''_c$ | Sym. | $v_{tCH_3}$ | $\nu_{Obs.}$ | $\nu_{Obs.} - \nu_{Calc.}$ | $E_{low}$ |
|------|--------|--------|-------|---------|---------|------|-------------|--------------|----------------------------|-----------|
| 30   | 23     | 7      | 29    | 23      | 6       | E    | 1           | 176544.723   | -0.150                     | 368.7094  |
| 30   | 24     | 6      | 29    | 24      | 5       | A    | 0           | 176574.666   | -0.010                     | 261.2448  |
| 30   | 24     | 7      | 29    | 24      | 6       | A    | 0           | 176574.666   | -0.010                     | 261.2448  |
| 30   | 24     | 7      | 29    | 24      | 6       | E    | 0           | 176574.666   | -0.062                     | 261.2251  |
| 30   | 22     | 9      | 29    | 22      | 8       | E    | 1           | 176617.252   | 0.097                      | 359.4581  |
| 30   | 22     | 8      | 29    | 22      | 7       | E    | 1           | 176626.661   | 0.098                      | 359.8109  |
| 30   | 22     | 8      | 29    | 22      | 7       | A    | 1           | 176635.487   | 0.047                      | 359.1758  |
| 30   | 22     | 9      | 29    | 22      | 8       | A    | 1           | 176635.487   | 0.047                      | 359.1758  |
| 30   | 23     | 7      | 29    | 23      | 6       | A    | 0           | 176648.839   | 0.065                      | 251.9288  |
| 30   | 23     | 8      | 29    | 23      | 7       | A    | 0           | 176648.839   | 0.065                      | 251.9288  |
| 30   | 23     | 8      | 29    | 23      | 7       | E    | 0           | 176648.839   | -0.084                     | 251.9088  |
| 42   | 16     | 26     | 42    | 15      | 27      | E    | 0           | 176656.161   | 0.377                      | 284.9095  |
| 45   | 5      | 40     | 45    | 4       | 41      | A    | 0           | 176676.554   | 0.413                      | 262.7167  |
| 45   | 6      | 40     | 45    | 4       | 41      | A    | 0           | 176676.554   | 0.413                      | 262.7167  |
| 45   | 5      | 40     | 45    | 5       | 41      | A    | 0           | 176676.554   | 0.413                      | 262.7167  |
| 45   | 6      | 40     | 45    | 5       | 41      | A    | 0           | 176676.554   | 0.413                      | 262.7167  |
| 30   | 21     | 10     | 29    | 21      | 9       | E    | 1           | 176711.482   | 0.021                      | 350.8949  |
| 30   | 21     | 9      | 29    | 21      | 8       | E    | 1           | 176719.325   | 0.057                      | 351.3075  |
| 42   | 16     | 27     | 42    | 15      | 28      | A    | 0           | 176727.469   | 0.108                      | 284.9015  |
| 30   | 22     | 8      | 29    | 22      | 7       | A    | 0           | 176732.510   | 0.104                      | 243.0118  |
| 30   | 22     | 9      | 29    | 22      | 8       | A    | 0           | 176732.510   | 0.104                      | 243.0118  |
| 30   | 22     | 9      | 29    | 22      | 8       | E    | 0           | 176732.510   | -0.160                     | 242.9918  |
| 30   | 21     | 10     | 29    | 21      | 9       | A    | 1           | 176732.515   | 0.046                      | 350.6807  |
| 30   | 21     | 9      | 29    | 21      | 8       | A    | 1           | 176732.515   | 0.046                      | 350.6807  |
| 45   | 6      | 40     | 45    | 5       | 41      | E    | 1           | 176746.581   | -0.250                     | 379.0171  |
| 45   | 5      | 40     | 45    | 5       | 41      | E    | 1           | 176746.581   | -0.250                     | 379.0171  |
| 45   | 6      | 40     | 45    | 4       | 41      | E    | 1           | 176746.581   | -0.250                     | 379.0171  |
| 45   | 5      | 40     | 45    | 4       | 41      | E    | 1           | 176746.581   | -0.250                     | 379.0171  |
| 30   | 20     | 11     | 29    | 20      | 10      | E    | 1           | 176819.810   | -0.056                     | 342.7330  |
| 30   | 20     | 10     | 29    | 20      | 9       | E    | 1           | 176825.292   | -0.070                     | 343.1996  |
| 30   | 21     | 9      | 29    | 21      | 8       | A    | 0           | 176827.646   | 0.137                      | 234.4942  |
| 30   | 21     | 10     | 29    | 21      | 9       | A    | 0           | 176827.646   | 0.137                      | 234.4942  |
| 30   | 21     | 10     | 29    | 21      | 9       | E    | 0           | 176827.646   | -0.260                     | 234.4745  |
| 30   | 20     | 10     | 29    | 20      | 9       | A    | 0           | 176936.869   | 0.333                      | 226.3767  |
| 30   | 20     | 11     | 29    | 20      | 10      | A    | 0           | 176936.869   | 0.333                      | 226.3767  |
| 30   | 20     | 11     | 29    | 20      | 10      | E    | 0           | 176936.869   | -0.221                     | 226.3576  |
| 30   | 19     | 12     | 29    | 19      | 11      | E    | 1           | 176945.520   | -0.041                     | 334.9737  |
| 30   | 19     | 11     | 29    | 19      | 10      | E    | 1           | 176947.934   | 0.044                      | 335.4877  |
| 30   | 19     | 11     | 29    | 19      | 10      | A    | 1           | 176972.148   | 0.097                      | 334.9036  |
| 30   | 19     | 12     | 29    | 19      | 11      | A    | 1           | 176972.148   | 0.097                      | 334.9036  |
| 30   | 19     | 11     | 29    | 19      | 10      | A    | 0           | 177062.973   | 0.338                      | 218.6600  |
| 30   | 19     | 12     | 29    | 19      | 11      | A    | 0           | 177062.973   | 0.338                      | 218.6600  |
| 30   | 19     | 12     | 29    | 19      | 11      | E    | 0           | 177062.973   | -0.400                     | 218.6417  |
| 47   | 6      | 41     | 47    | 5       | 42      | A    | 0           | 177101.261   | 0.362                      | 285.7533  |
| 30   | 18     | 12     | 29    | 18      | 11      | A    | 1           | 177121.897   | 0.002                      | 327.6225  |
| 30   | 18     | 13     | 29    | 18      | 12      | A    | 1           | 177121.897   | 0.002                      | 327.6225  |
| 30   | 18     | 12     | 29    | 18      | 11      | A    | 0           | 177209.943   | 0.040                      | 211.3452  |
| 30   | 18     | 13     | 29    | 18      | 12      | A    | 0           | 177209.943   | 0.040                      | 211.3452  |
| 30   | 18     | 12     | 29    | 18      | 11      | E    | 0           | 177210.884   | 0.040                      | 211.3453  |
| 30   | 18     | 13     | 29    | 18      | 12      | E    | 0           | 177210.884   | 0.040                      | 211.3280  |
| 15   | 8      | 7      | 14    | 7       | 7       | E    | 0           | 177240.368   | -0.162                     | 92.0163   |
| 30   | 17     | 13     | 29    | 17      | 12      | E    | 1           | 177259.399   | 0.049                      | 321.2555  |
| 15   | 8      | 7      | 14    | 7       | 8       | A    | 0           | 177266.609   | -0.308                     | 91.9970   |
| 30   | 17     | 14     | 29    | 17      | 13      | E    | 1           | 177266.617   | -0.183                     | 320.6692  |
| 15   | 3      | 12     | 14    | 2       | 13      | E    | 1           | 177288.401   | 0.539                      | 198.4182  |
| 30   | 17     | 14     | 29    | 17      | 13      | A    | 1           | 177298.674   | 0.061                      | 320.7475  |
| 30   | 17     | 13     | 29    | 17      | 12      | A    | 1           | 177298.674   | 0.061                      | 320.7475  |
| 30   | 17     | 13     | 29    | 17      | 12      | A    | 0           | 177383.714   | -0.055                     | 204.4334  |
| 30   | 17     | 14     | 29    | 17      | 13      | A    | 0           | 177383.714   | -0.055                     | 204.4334  |
| 30   | 17     | 13     | 29    | 17      | 12      | E    | 0           | 177385.004   | 0.127                      | 204.4358  |
| 30   | 17     | 14     | 29    | 17      | 13      | E    | 0           | 177385.004   | 0.127                      | 204.4175  |
| 30   | 16     | 14     | 29    | 16      | 13      | E    | 1           | 177460.600   | 0.019                      | 314.7380  |
| 30   | 16     | 15     | 29    | 16      | 14      | E    | 1           | 177475.325   | 0.008                      | 314.1280  |
| 30   | 16     | 14     | 29    | 16      | 13      | A    | 1           | 177509.671   | 0.066                      | 314.2796  |
| 30   | 16     | 15     | 29    | 16      | 14      | A    | 1           | 177509.671   | 0.066                      | 314.2796  |
| 13   | 9      | 5      | 12    | 8       | 5       | E    | 0           | 177522.592   | 0.045                      | 89.6262   |
| 30   | 16     | 14     | 29    | 16      | 13      | A    | 0           | 177591.529   | -0.042                     | 197.9263  |
| 30   | 16     | 15     | 29    | 16      | 14      | A    | 0           | 177591.529   | -0.042                     | 197.9263  |
| 30   | 16     | 14     | 29    | 16      | 13      | E    | 0           | 177593.037   | 0.168                      | 197.9311  |
| 30   | 16     | 15     | 29    | 16      | 14      | E    | 0           | 177593.037   | 0.168                      | 197.9120  |
| 11   | 10     | 2      | 10    | 9       | 2       | E    | 0           | 177698.779   | 0.258                      | 88.4718   |
| 30   | 15     | 15     | 29    | 15      | 14      | E    | 1           | 177704.254   | -0.011                     | 308.6224  |
| 30   | 15     | 16     | 29    | 15      | 15      | E    | 1           | 177728.596   | -0.012                     | 307.9976  |
| 30   | 6      | 25     | 29    | 5       | 24      | A    | 1           | 177756.632   | 0.314                      | 271.8063  |
| 30   | 15     | 15     | 29    | 15      | 14      | A    | 1           | 177765.232   | 0.101                      | 308.2205  |
| 30   | 15     | 16     | 29    | 15      | 15      | A    | 1           | 177765.232   | 0.101                      | 308.2205  |
| 11   | 10     | 2      | 10    | 9       | 1       | A    | 0           | 177768.579   | 0.294                      | 88.4718   |
| 11   | 10     | 1      | 10    | 9       | 2       | A    | 0           | 177768.579   | 0.294                      | 88.4718   |
| 30   | 15     | 15     | 29    | 15      | 14      | A    | 0           | 177843.515   | 0.032                      | 191.8262  |
| 30   | 15     | 16     | 29    | 15      | 15      | A    | 0           | 177843.515   | 0.032                      | 191.8262  |
| 30   | 15     | 15     | 29    | 15      | 14      | E    | 0           | 177845.243   | 0.244                      | 191.8333  |
| 30   | 15     | 16     | 29    | 15      | 15      | E    | 0           | 177845.243   | 0.244                      | 191.8137  |
| 40   | 2      | 38     | 40    | 1       | 39      | E    | 0           | 177951.156   | -0.387                     | 206.5906  |
| 40   | 3      | 38     | 40    | 1       | 39      | E    | 0           | 177951.156   | -0.387                     | 206.5906  |
| 40   | 3      | 38     | 40    | 2       | 39      | E    | 0           | 177951.156   | -0.387                     | 206.5906  |
| 40   | 2      | 38     | 40    | 1       | 39      | A    | 0           | 177993.004   | -0.325                     | 206.5756  |
| 40   | 3      | 38     | 40    | 1       | 39      | A    | 0           | 177993.004   | -0.325                     | 206.5756  |
| 40   | 3      | 38     | 40    | 2       | 39      | A    | 0           | 177993.004   | -0.325                     | 206.5756  |
| 30   | 14     | 16     | 29    | 14      | 15      | E    | 1           | 178004.329   | 0.020                      | 302.9118  |
| 30   | 14     | 17     | 29    | 14      | 16      | E    | 1           | 178041.498   | -0.011                     | 302.2816  |
| 30   | 14     | 17     | 29    | 14      | 16      | A    | 1           | 178079.909   | 0.031                      | 302.5730  |
| 30   | 14     | 16     | 29    | 14      | 15      | A    | 1           | 178079.909   | 0.031                      | 302.5730  |
| 30   | 6      | 25     | 29    | 5       | 24      | E    | 0           | 178136.543   | -0.133                     | 155.0893  |
| 30   | 14     | 16     | 29    | 14      | 15      | A    | 0           | 178154.039   | -0.011                     | 186.1363  |
| 30   | 14     | 17     | 29    | 14      | 16      | A    | 0           | 178154.039   | -0.011                     | 186.1363  |
| 30   | 14     | 16     | 29    | 14      | 15      | E    | 0           | 178155.570   | 0.320                      | 186.1455  |
| 30   | 14     | 17     | 29    | 14      | 16      | E    | 0           | 178156.567   | 0.176                      | 186.1257  |
| 30   | 13     | 17     | 29    | 13      | 16      | E    | 1           | 178381.286   | -0.024                     | 297.6108  |
| 30   | 13     | 18     | 29    | 13      | 17      | E    | 1           | 178436.166   | 0.018                      | 296.9848  |
| 24   | 9      | 15     | 24    | 7       | 17      | E    | 1           | 178447.873   | 0.772                      | 247.6694  |
| 42   | 3      | 39     | 42    | 2       | 40      | A    | 1           | 178457.042   | -0.048                     | 343.7584  |
| 42   | 4      | 39     | 42    | 2       | 40      | A    | 1           | 178457.042   | -0.048                     | 343.7584  |
| 42   | 3      | 39     | 42    | 3       | 40      | A    | 1           | 178457.042   | -0.048                     | 343.7584  |
| 42   | 4      | 39     | 42    | 3       | 40      | A    | 1           | 178457.042   | -0.048                     | 343.7584  |
| 30   | 13     | 18     | 29    | 13      | 17      | A    | 1           | 178475.728   | 0.004                      | 297.3408  |
| 30   | 13     | 17     | 29    | 13      | 16      | A    | 1           | 178475.728   | 0.004                      | 297.3408  |
| 29   | 8      | 21     | 28    | 8       | 20      | E    | 1           | 178501.453   | 0.062                      | 271.8459  |
| 30   | 13     | 17     | 29    | 13      | 16      | A    | 0           | 178544.923   | 0.016                      | 180.8610  |
| 30   | 13     | 18     | 29    | 13      | 17      | A    | 0           | 178544.923   | 0.016                      | 180.8610  |
| 30   | 13     | 17     | 29    | 13      | 16      | E    | 0           | 178546.293   | 0.159                      | 180.8723  |
| 30   | 13     | 18     | 29    | 13      | 17      | E    | 0           | 178547.961   | 0.118                      | 180.8526  |
| 40   | 16     | 24     | 40    | 15      | 26      | E    | 0           | 178696.764   | -0.461                     | 268.2973  |
| 30   | 12     | 18     | 29    | 12      | 17      | E    | 1           | 178867.436   | 0.011                      | 292.7260  |
| 30   | 12     | 19     | 29    | 12      | 18      | E    | 1           | 178947.433   | 0.010                      | 292.1146  |
| 30   | 12     | 19     | 29    | 12      | 18      | A    | 1           | 178986.367   | -0.069                     | 292.5303  |
| 30   | 12     | 18     | 29    | 12      | 17      | A    | 1           | 178987.844   | 0.043                      | 292.5304  |

| $J'$ | $K'_a$ | $K'_c$ | $J''$ | $K''_a$ | $K''_c$ | Sym. | $v_{tCH_3}$ | $\nu_{Obs.}$ | $\nu_{Obs.} - \nu_{Calc.}$ | $E_{low}$ |
|------|--------|--------|-------|---------|---------|------|-------------|--------------|----------------------------|-----------|
| 30   | 12     | 19     | 29    | 12      | 18      | A    | 0           | 179049.446   | 0.015                      | 176.0072  |
| 30   | 12     | 18     | 29    | 12      | 17      | A    | 0           | 179051.142   | 0.454                      | 176.0072  |
| 30   | 12     | 18     | 29    | 12      | 17      | E    | 0           | 179051.142   | -0.132                     | 176.0203  |
| 30   | 12     | 19     | 29    | 12      | 18      | E    | 0           | 179054.007   | 0.213                      | 176.0011  |
| 29   | 6      | 23     | 28    | 6       | 22      | A    | 1           | 179146.328   | 0.021                      | 268.3554  |
| 14   | 4      | 11     | 13    | 2       | 12      | E    | 1           | 179169.828   | -0.042                     | 195.8652  |
| 17   | 5      | 12     | 16    | 3       | 13      | E    | 1           | 179202.166   | 0.385                      | 207.6075  |
| 31   | 5      | 26     | 30    | 6       | 25      | A    | 1           | 179308.776   | -0.081                     | 277.7356  |
| 30   | 7      | 24     | 29    | 7       | 23      | A    | 1           | 179367.799   | -0.024                     | 274.8267  |
| 31   | 5      | 26     | 30    | 6       | 25      | E    | 1           | 179392.503   | 0.150                      | 277.3296  |
| 31   | 5      | 26     | 30    | 6       | 25      | E    | 0           | 179424.603   | 0.039                      | 161.0313  |
| 38   | 16     | 23     | 38    | 15      | 24      | A    | 0           | 179427.970   | -0.351                     | 252.5510  |
| 29   | 6      | 23     | 28    | 6       | 22      | E    | 0           | 179444.438   | 0.022                      | 151.6231  |
| 29   | 6      | 23     | 28    | 6       | 22      | E    | 1           | 179444.438   | -0.304                     | 267.9079  |
| 29   | 6      | 23     | 28    | 6       | 22      | A    | 0           | 179455.337   | -0.050                     | 151.6088  |
| 42   | 3      | 39     | 42    | 2       | 40      | E    | 0           | 179467.956   | -0.219                     | 227.0491  |
| 42   | 4      | 39     | 42    | 2       | 40      | E    | 0           | 179467.956   | -0.219                     | 227.0491  |
| 42   | 4      | 39     | 42    | 3       | 40      | E    | 0           | 179467.956   | -0.219                     | 227.0491  |
| 42   | 3      | 39     | 42    | 2       | 40      | A    | 0           | 179506.007   | -0.173                     | 227.0357  |
| 42   | 4      | 39     | 42    | 2       | 40      | A    | 0           | 179506.007   | -0.173                     | 227.0357  |
| 42   | 3      | 39     | 42    | 3       | 40      | A    | 0           | 179506.007   | -0.173                     | 227.0357  |
| 42   | 4      | 39     | 42    | 3       | 40      | A    | 0           | 179506.007   | -0.173                     | 227.0357  |
| 30   | 11     | 19     | 29    | 11      | 18      | E    | 1           | 179516.965   | 0.061                      | 288.2680  |
| 30   | 7      | 24     | 29    | 7       | 23      | E    | 0           | 179534.092   | 0.053                      | 158.1312  |
| 30   | 7      | 24     | 29    | 7       | 23      | A    | 0           | 179537.538   | 0.055                      | 158.1189  |
| 30   | 7      | 24     | 29    | 7       | 23      | E    | 1           | 179632.848   | 0.005                      | 274.4202  |
| 30   | 11     | 20     | 29    | 11      | 19      | E    | 1           | 179635.193   | 0.068                      | 287.6819  |
| 30   | 11     | 20     | 29    | 11      | 19      | A    | 1           | 179663.419   | -0.007                     | 288.1514  |
| 30   | 11     | 19     | 29    | 11      | 18      | A    | 1           | 179682.481   | -0.027                     | 288.1519  |
| 30   | 11     | 20     | 29    | 11      | 19      | A    | 0           | 179718.698   | 0.071                      | 171.5851  |
| 30   | 11     | 19     | 29    | 11      | 18      | E    | 0           | 179729.026   | 0.021                      | 171.6002  |
| 30   | 11     | 20     | 29    | 11      | 19      | E    | 0           | 179731.997   | 0.047                      | 171.5817  |
| 30   | 11     | 19     | 29    | 11      | 18      | A    | 0           | 179736.359   | 0.057                      | 171.5856  |
| 29   | 8      | 21     | 28    | 8       | 20      | A    | 0           | 179768.259   | 0.069                      | 155.4053  |
| 29   | 8      | 21     | 28    | 8       | 20      | E    | 0           | 179776.411   | 0.102                      | 155.4174  |
| 29   | 8      | 21     | 28    | 8       | 20      | A    | 1           | 179829.794   | -0.111                     | 272.1042  |
| 31   | 9      | 23     | 31    | 7       | 25      | E    | 1           | 180011.044   | 0.718                      | 286.5806  |
| 18   | 7      | 12     | 17    | 6       | 11      | A    | 1           | 180152.562   | 0.178                      | 215.8423  |
| 32   | 4      | 28     | 31    | 5       | 27      | A    | 1           | 180193.242   | -0.185                     | 280.1925  |
| 32   | 5      | 28     | 31    | 5       | 27      | A    | 1           | 180239.554   | -0.098                     | 280.1925  |
| 31   | 6      | 26     | 30    | 6       | 25      | A    | 1           | 180267.808   | 0.012                      | 277.7356  |
| 33   | 3      | 30     | 32    | 4       | 29      | A    | 1           | 180269.323   | -0.193                     | 282.1512  |
| 33   | 4      | 30     | 32    | 4       | 29      | A    | 1           | 180270.805   | -0.062                     | 282.1512  |
| 33   | 3      | 30     | 32    | 3       | 29      | A    | 1           | 180272.026   | -0.015                     | 282.1512  |
| 33   | 4      | 30     | 32    | 3       | 29      | A    | 1           | 180273.401   | 0.010                      | 282.1512  |
| 32   | 4      | 28     | 31    | 4       | 27      | A    | 1           | 180274.920   | -0.010                     | 280.1898  |
| 32   | 5      | 28     | 31    | 4       | 27      | A    | 1           | 180320.884   | -0.270                     | 280.1898  |
| 22   | 9      | 14     | 22    | 7       | 16      | E    | 1           | 180356.142   | 0.621                      | 237.7068  |
| 32   | 4      | 28     | 31    | 5       | 27      | E    | 1           | 180359.196   | 0.043                      | 279.7786  |
| 32   | 4      | 28     | 31    | 5       | 27      | E    | 0           | 180367.342   | -0.100                     | 163.4795  |
| 32   | 4      | 28     | 31    | 5       | 27      | A    | 0           | 180372.453   | 0.001                      | 163.4666  |
| 33   | 3      | 30     | 32    | 4       | 29      | E    | 1           | 180402.625   | -0.120                     | 281.7204  |
| 36   | 16     | 21     | 36    | 15      | 22      | E    | 0           | 180404.213   | -0.104                     | 237.6105  |
| 33   | 4      | 30     | 32    | 4       | 29      | E    | 1           | 180404.219   | -0.143                     | 281.7204  |
| 33   | 3      | 30     | 32    | 3       | 29      | E    | 1           | 180405.731   | -0.009                     | 281.7203  |
| 34   | 2      | 32     | 33    | 2       | 31      | A    | 1           | 180408.336   | -0.101                     | 283.6505  |
| 34   | 3      | 32     | 33    | 2       | 31      | A    | 1           | 180408.336   | -0.101                     | 283.6505  |
| 34   | 2      | 32     | 33    | 3       | 31      | A    | 1           | 180408.336   | -0.101                     | 283.6505  |
| 34   | 3      | 32     | 33    | 3       | 31      | A    | 1           | 180408.336   | -0.101                     | 283.6505  |
| 34   | 3      | 32     | 33    | 3       | 31      | A    | 1           | 180408.336   | -0.101                     | 283.6505  |
| 32   | 7      | 26     | 32    | 8       | 25      | E    | 0           | 180412.793   | -0.114                     | 179.7612  |
| 32   | 5      | 28     | 31    | 5       | 27      | E    | 1           | 180412.800   | -0.124                     | 279.7786  |
| 32   | 5      | 28     | 31    | 5       | 27      | E    | 0           | 180418.492   | -0.080                     | 163.4795  |
| 33   | 4      | 30     | 32    | 4       | 29      | E    | 0           | 180421.243   | -0.105                     | 165.4240  |
| 33   | 3      | 30     | 32    | 3       | 29      | E    | 0           | 180422.602   | -0.054                     | 165.4239  |
| 33   | 3      | 30     | 32    | 4       | 29      | A    | 0           | 180423.955   | 0.054                      | 165.4105  |
| 32   | 5      | 28     | 31    | 5       | 27      | A    | 0           | 180423.955   | 0.054                      | 163.4666  |
| 33   | 4      | 30     | 32    | 3       | 29      | E    | 0           | 180423.955   | -0.221                     | 165.4239  |
| 33   | 4      | 30     | 32    | 4       | 29      | A    | 0           | 180425.408   | -0.042                     | 165.4105  |
| 33   | 3      | 30     | 32    | 3       | 29      | A    | 0           | 180426.802   | 0.036                      | 165.4104  |
| 33   | 4      | 30     | 32    | 3       | 29      | A    | 0           | 180428.455   | 0.158                      | 165.4104  |
| 30   | 10     | 20     | 29    | 10      | 19      | E    | 1           | 180435.358   | 0.055                      | 284.2542  |
| 32   | 4      | 28     | 31    | 4       | 27      | E    | 1           | 180453.043   | -0.131                     | 279.7755  |
| 32   | 4      | 28     | 31    | 4       | 27      | E    | 0           | 180457.144   | -0.043                     | 163.4766  |
| 32   | 4      | 28     | 31    | 4       | 27      | A    | 0           | 180462.624   | -0.076                     | 163.4636  |
| 31   | 6      | 26     | 30    | 6       | 25      | E    | 0           | 180466.100   | -0.098                     | 161.0313  |
| 31   | 6      | 26     | 30    | 6       | 25      | A    | 0           | 180472.101   | -0.055                     | 161.0186  |
| 31   | 6      | 26     | 30    | 6       | 25      | E    | 1           | 180474.085   | -0.194                     | 277.3296  |
| 34   | 3      | 32     | 33    | 3       | 31      | E    | 1           | 180503.908   | -0.072                     | 283.1936  |
| 34   | 2      | 32     | 33    | 3       | 31      | E    | 1           | 180503.908   | -0.072                     | 283.1936  |
| 34   | 3      | 32     | 33    | 2       | 31      | E    | 1           | 180503.908   | -0.072                     | 283.1936  |
| 34   | 2      | 32     | 33    | 2       | 31      | E    | 1           | 180503.908   | -0.072                     | 283.1936  |
| 32   | 5      | 28     | 31    | 4       | 27      | E    | 1           | 180506.754   | -0.192                     | 279.7755  |
| 32   | 5      | 28     | 31    | 4       | 27      | E    | 0           | 180508.325   | 0.009                      | 163.4766  |
| 32   | 5      | 28     | 31    | 4       | 27      | A    | 0           | 180514.076   | -0.055                     | 163.4636  |
| 34   | 2      | 32     | 33    | 2       | 31      | E    | 0           | 180530.882   | -0.006                     | 166.9030  |
| 34   | 3      | 32     | 33    | 2       | 31      | E    | 0           | 180530.882   | -0.006                     | 166.9030  |
| 34   | 2      | 32     | 33    | 3       | 31      | E    | 0           | 180530.882   | -0.006                     | 166.9030  |
| 34   | 3      | 32     | 33    | 3       | 31      | E    | 0           | 180530.882   | -0.006                     | 166.9030  |
| 34   | 2      | 32     | 33    | 2       | 31      | A    | 0           | 180533.812   | -0.005                     | 166.8887  |
| 34   | 3      | 32     | 33    | 2       | 31      | A    | 0           | 180533.812   | -0.005                     | 166.8887  |
| 34   | 2      | 32     | 33    | 3       | 31      | A    | 0           | 180533.812   | -0.005                     | 166.8887  |
| 34   | 3      | 32     | 33    | 3       | 31      | A    | 0           | 180533.812   | -0.005                     | 166.8887  |
| 30   | 10     | 21     | 29    | 10      | 20      | A    | 1           | 180548.244   | -0.101                     | 284.2188  |
| 30   | 10     | 21     | 29    | 10      | 20      | A    | 0           | 180596.383   | 0.092                      | 167.6102  |
| 35   | 1      | 34     | 34    | 1       | 33      | A    | 1           | 180598.447   | -0.069                     | 284.7211  |
| 35   | 2      | 34     | 34    | 1       | 33      | A    | 1           | 180598.447   | -0.069                     | 284.7211  |
| 35   | 1      | 34     | 34    | 2       | 33      | A    | 1           | 180598.447   | -0.069                     | 284.7211  |
| 35   | 2      | 34     | 34    | 2       | 33      | A    | 1           | 180598.447   | -0.069                     | 284.7211  |
| 30   | 10     | 21     | 29    | 10      | 20      | E    | 1           | 180616.046   | 0.149                      | 283.7058  |
| 30   | 10     | 21     | 29    | 10      | 20      | E    | 0           | 180649.085   | 0.038                      | 167.6121  |
| 35   | 2      | 34     | 34    | 2       | 33      | E    | 1           | 180655.630   | -0.057                     | 284.2295  |
| 35   | 1      | 34     | 34    | 2       | 33      | E    | 1           | 180655.630   | -0.057                     | 284.2295  |
| 35   | 2      | 34     | 34    | 1       | 33      | E    | 1           | 180655.630   | -0.057                     | 284.2295  |
| 35   | 1      | 34     | 34    | 1       | 33      | E    | 1           | 180655.630   | -0.057                     | 284.2295  |
| 44   | 4      | 40     | 44    | 3       | 41      | E    | 0           | 180669.786   | 0.017                      | 248.5397  |
| 44   | 5      | 40     | 44    | 3       | 41      | E    | 0           | 180669.786   | 0.017                      | 248.5397  |
| 44   | 5      | 40     | 44    | 4       | 41      | E    | 0           | 180669.786   | 0.017                      | 248.5397  |
| 35   | 1      | 34     | 34    | 1       | 33      | E    | 0           | 180692.257   | -0.022                     | 167.9474  |
| 35   | 2      | 34     | 34    | 1       | 33      | E    | 0           | 180692.257   | -0.022                     | 167.9474  |
| 35   | 1      | 34     | 34    | 2       | 33      | E    | 0           | 180692.257   | -0.022                     | 167.9474  |
| 35   | 2      | 34     | 34    | 2       | 33      | E    | 0           | 180692.257   | -0.022                     | 167.9474  |
| 35   | 1      | 34     | 34    | 1       | 33      | A    | 0           | 180694.068   | 0.041                      | 167.9320  |
| 35   | 2      | 34     | 34    | 1       | 33      | A    | 0           | 180694.068   | 0.041                      | 167.9320  |
| 35   | 1      | 34     | 34    | 2       | 33      | A    | 0           | 180694.068   | 0.041                      | 167.9320  |
| 35   | 2      | 34     | 34    | 2       | 33      | A    | 0           | 180694.068   | 0.041                      | 167.9320  |
| 44   | 4      | 40     | 44    | 3       | 41      | A    | 0           | 180703.935   | 0.155                      | 248.5278  |

| $J'$ | $K'_a$ | $K'_c$ | $J''$ | $K''_a$ | $K''_c$ | Sym. | $v_{tCH_3}$ | $\nu_{Obs.}$ | $\nu_{Obs.} - \nu_{Calc.}$ | $E_{low}$ |
|------|--------|--------|-------|---------|---------|------|-------------|--------------|----------------------------|-----------|
| 44   | 5      | 40     | 44    | 3       | 41      | A    | 0           | 180703.935   | 0.155                      | 248.5278  |
| 44   | 5      | 40     | 44    | 4       | 41      | A    | 0           | 180703.935   | 0.155                      | 248.5278  |
| 30   | 10     | 20     | 29    | 10      | 19      | E    | 0           | 180739.643   | 0.086                      | 167.6308  |
| 30   | 10     | 20     | 29    | 10      | 19      | A    | 1           | 180749.884   | -0.020                     | 284.2263  |
| 30   | 10     | 20     | 29    | 10      | 19      | A    | 0           | 180784.675   | 0.070                      | 167.6172  |
| 36   | 0      | 36     | 35    | 0       | 35      | A    | 1           | 180811.480   | -0.042                     | 285.3828  |
| 36   | 1      | 36     | 35    | 0       | 35      | A    | 1           | 180811.480   | -0.042                     | 285.3828  |
| 36   | 0      | 36     | 35    | 1       | 35      | A    | 1           | 180811.480   | -0.042                     | 285.3828  |
| 36   | 1      | 36     | 35    | 1       | 35      | A    | 1           | 180811.480   | -0.042                     | 285.3828  |
| 36   | 1      | 36     | 35    | 1       | 35      | E    | 1           | 180827.727   | -0.081                     | 284.8479  |
| 36   | 0      | 36     | 35    | 1       | 35      | E    | 1           | 180827.727   | -0.081                     | 284.8479  |
| 36   | 1      | 36     | 35    | 0       | 35      | E    | 1           | 180827.727   | -0.081                     | 284.8479  |
| 36   | 0      | 36     | 35    | 0       | 35      | E    | 1           | 180827.727   | -0.081                     | 284.8479  |
| 44   | 5      | 40     | 44    | 4       | 41      | E    | 1           | 180833.714   | -0.333                     | 364.8252  |
| 44   | 4      | 40     | 44    | 4       | 41      | E    | 1           | 180833.714   | -0.333                     | 364.8252  |
| 44   | 5      | 40     | 44    | 3       | 41      | E    | 1           | 180833.714   | -0.333                     | 364.8252  |
| 44   | 4      | 40     | 44    | 3       | 41      | E    | 1           | 180833.714   | -0.333                     | 364.8252  |
| 31   | 5      | 26     | 30    | 5       | 25      | A    | 1           | 180868.312   | -0.050                     | 277.6836  |
| 36   | 0      | 36     | 35    | 0       | 35      | A    | 0           | 180874.916   | -0.246                     | 168.5602  |
| 36   | 1      | 36     | 35    | 0       | 35      | A    | 0           | 180874.916   | -0.246                     | 168.5602  |
| 36   | 0      | 36     | 35    | 1       | 35      | A    | 0           | 180874.916   | -0.246                     | 168.5602  |
| 36   | 1      | 36     | 35    | 1       | 35      | A    | 0           | 180874.916   | -0.246                     | 168.5602  |
| 36   | 0      | 36     | 35    | 0       | 35      | E    | 0           | 180874.916   | 0.250                      | 168.5769  |
| 36   | 1      | 36     | 35    | 0       | 35      | E    | 0           | 180874.916   | 0.250                      | 168.5769  |
| 36   | 0      | 36     | 35    | 1       | 35      | E    | 0           | 180874.916   | 0.250                      | 168.5769  |
| 36   | 1      | 36     | 35    | 1       | 35      | E    | 0           | 180874.916   | 0.250                      | 168.5769  |
| 31   | 5      | 26     | 30    | 5       | 25      | E    | 0           | 181110.333   | -0.081                     | 160.9751  |
| 31   | 5      | 26     | 30    | 5       | 25      | A    | 0           | 181118.949   | -0.059                     | 160.9621  |
| 31   | 5      | 26     | 30    | 5       | 25      | E    | 1           | 181135.432   | -0.148                     | 277.2714  |
| 30   | 9      | 22     | 29    | 9       | 21      | A    | 1           | 181450.226   | -0.013                     | 280.7436  |
| 30   | 8      | 23     | 29    | 8       | 22      | A    | 1           | 181458.938   | -0.065                     | 277.6784  |
| 30   | 9      | 22     | 29    | 9       | 21      | A    | 0           | 181506.187   | 0.046                      | 164.0947  |
| 30   | 9      | 22     | 29    | 9       | 21      | E    | 0           | 181521.001   | 0.066                      | 164.1035  |
| 46   | 5      | 41     | 46    | 4       | 42      | E    | 0           | 181532.054   | 0.303                      | 271.0534  |
| 46   | 6      | 41     | 46    | 4       | 42      | E    | 0           | 181532.054   | 0.303                      | 271.0534  |
| 46   | 6      | 41     | 46    | 5       | 42      | E    | 0           | 181532.054   | 0.303                      | 271.0534  |
| 30   | 8      | 23     | 29    | 8       | 22      | A    | 0           | 181562.294   | -0.079                     | 160.9949  |
| 30   | 8      | 23     | 29    | 8       | 22      | E    | 0           | 181564.102   | 0.130                      | 161.0061  |
| 30   | 9      | 21     | 29    | 9       | 20      | E    | 1           | 181969.572   | 0.029                      | 280.7194  |
| 30   | 9      | 22     | 29    | 9       | 21      | E    | 1           | 182064.238   | 0.154                      | 280.2217  |
| 31   | 29     | 2      | 30    | 29      | 1       | A    | 0           | 182213.919   | -0.416                     | 319.6778  |
| 31   | 29     | 3      | 30    | 29      | 2       | A    | 0           | 182213.919   | -0.416                     | 319.6778  |
| 31   | 28     | 3      | 30    | 28      | 2       | A    | 0           | 182262.886   | -0.264                     | 308.3735  |
| 31   | 28     | 4      | 30    | 28      | 3       | A    | 0           | 182262.886   | -0.264                     | 308.3735  |
| 31   | 28     | 4      | 30    | 28      | 3       | E    | 0           | 182262.886   | -0.395                     | 308.3551  |
| 30   | 8      | 23     | 29    | 8       | 22      | E    | 1           | 182287.648   | 0.134                      | 277.2346  |
| 31   | 27     | 4      | 30    | 27      | 3       | A    | 0           | 182316.436   | -0.160                     | 297.4667  |
| 31   | 27     | 5      | 30    | 27      | 4       | A    | 0           | 182316.436   | -0.160                     | 297.4667  |
| 31   | 27     | 5      | 30    | 27      | 4       | E    | 0           | 182316.436   | -0.367                     | 297.4494  |
| 31   | 25     | 6      | 30    | 25      | 6       | A    | 1           | 182335.805   | -0.190                     | 392.9685  |
| 31   | 25     | 6      | 30    | 25      | 5       | A    | 1           | 182335.805   | -0.190                     | 392.9685  |
| 31   | 25     | 6      | 30    | 25      | 5       | E    | 1           | 182335.805   | 0.179                      | 393.5758  |
| 31   | 26     | 5      | 30    | 26      | 4       | A    | 0           | 182375.325   | -0.116                     | 286.9578  |
| 31   | 26     | 6      | 30    | 26      | 5       | A    | 0           | 182375.325   | -0.116                     | 286.9578  |
| 31   | 26     | 6      | 30    | 26      | 5       | E    | 0           | 182375.325   | -0.040                     | 286.9395  |
| 31   | 24     | 8      | 30    | 24      | 7       | E    | 1           | 182395.174   | -0.127                     | 383.6700  |
| 31   | 24     | 7      | 30    | 24      | 6       | E    | 1           | 182406.812   | -0.073                     | 383.8894  |
| 31   | 24     | 8      | 30    | 24      | 7       | A    | 1           | 182410.129   | -0.015                     | 383.2643  |
| 31   | 24     | 7      | 30    | 24      | 6       | A    | 1           | 182410.129   | -0.015                     | 383.2643  |
| 31   | 25     | 6      | 30    | 25      | 5       | A    | 0           | 182440.600   | -0.011                     | 276.8470  |
| 31   | 25     | 7      | 30    | 25      | 6       | A    | 0           | 182440.600   | -0.011                     | 276.8470  |
| 31   | 25     | 7      | 30    | 25      | 6       | E    | 0           | 182440.600   | -0.009                     | 276.8279  |
| 31   | 23     | 9      | 30    | 23      | 8       | A    | 1           | 182493.532   | 0.221                      | 373.9640  |
| 31   | 23     | 8      | 30    | 23      | 7       | A    | 1           | 182493.532   | 0.221                      | 373.9640  |
| 31   | 24     | 7      | 30    | 24      | 6       | A    | 0           | 182513.200   | -0.035                     | 267.1347  |
| 31   | 24     | 8      | 30    | 24      | 7       | A    | 0           | 182513.200   | -0.035                     | 267.1347  |
| 31   | 24     | 8      | 30    | 24      | 7       | E    | 0           | 182513.200   | -0.123                     | 267.1150  |
| 31   | 22     | 10     | 30    | 22      | 9       | E    | 1           | 182566.703   | -0.017                     | 365.3494  |
| 31   | 22     | 9      | 30    | 22      | 8       | E    | 1           | 182576.523   | 0.063                      | 365.7025  |
| 29   | 7      | 22     | 28    | 7       | 21      | E    | 1           | 182593.276   | -0.360                     | 269.6574  |
| 31   | 23     | 8      | 30    | 23      | 7       | A    | 0           | 182594.850   | 0.154                      | 257.8212  |
| 31   | 23     | 9      | 30    | 23      | 8       | A    | 0           | 182594.850   | 0.154                      | 257.8212  |
| 31   | 23     | 9      | 30    | 23      | 8       | E    | 0           | 182594.850   | -0.042                     | 257.8012  |
| 31   | 21     | 11     | 30    | 21      | 10      | E    | 1           | 182670.557   | -0.064                     | 356.7894  |
| 31   | 21     | 10     | 30    | 21      | 9       | E    | 1           | 182678.539   | 0.026                      | 357.2022  |
| 31   | 22     | 10     | 30    | 22      | 9       | E    | 0           | 182686.873   | -0.160                     | 248.8870  |
| 31   | 21     | 11     | 30    | 21      | 10      | A    | 1           | 182694.107   | 0.085                      | 356.5758  |
| 31   | 21     | 10     | 30    | 21      | 9       | A    | 1           | 182694.107   | 0.085                      | 356.5758  |
| 31   | 20     | 12     | 30    | 20      | 11      | E    | 1           | 182789.962   | -0.173                     | 348.6310  |
| 31   | 21     | 10     | 30    | 21      | 9       | A    | 0           | 182791.735   | 0.308                      | 240.3925  |
| 31   | 21     | 11     | 30    | 21      | 10      | A    | 0           | 182791.735   | 0.308                      | 240.3925  |
| 31   | 21     | 11     | 30    | 21      | 10      | E    | 0           | 182791.735   | -0.161                     | 240.3729  |
| 31   | 20     | 11     | 30    | 20      | 10      | E    | 1           | 182795.415   | 0.009                      | 349.0978  |
| 31   | 20     | 11     | 30    | 20      | 10      | A    | 1           | 182816.473   | 0.008                      | 348.4887  |
| 31   | 20     | 12     | 30    | 20      | 11      | A    | 1           | 182816.473   | 0.008                      | 348.4887  |
| 29   | 7      | 22     | 28    | 7       | 21      | A    | 1           | 182876.781   | -0.081                     | 270.0763  |
| 30   | 9      | 21     | 29    | 9       | 20      | E    | 0           | 182898.236   | 0.011                      | 164.1718  |
| 30   | 9      | 21     | 29    | 9       | 20      | A    | 0           | 182902.300   | 0.057                      | 164.1611  |
| 31   | 20     | 11     | 30    | 20      | 10      | A    | 0           | 182911.998   | 0.430                      | 232.2787  |
| 31   | 20     | 12     | 30    | 20      | 11      | A    | 0           | 182911.998   | 0.430                      | 232.2787  |
| 31   | 20     | 12     | 30    | 20      | 11      | E    | 0           | 182911.998   | -0.211                     | 232.2596  |
| 30   | 9      | 21     | 29    | 9       | 20      | A    | 1           | 182923.783   | -0.030                     | 280.8140  |
| 31   | 19     | 13     | 30    | 19      | 12      | E    | 1           | 182928.819   | 0.012                      | 340.8759  |
| 31   | 19     | 12     | 30    | 19      | 11      | E    | 1           | 182930.632   | 0.114                      | 341.3900  |
| 31   | 19     | 13     | 30    | 19      | 12      | A    | 1           | 182958.151   | 0.090                      | 340.8067  |
| 31   | 19     | 12     | 30    | 19      | 11      | A    | 1           | 182958.151   | 0.090                      | 340.8067  |
| 29   | 7      | 22     | 28    | 7       | 21      | A    | 0           | 182972.630   | -0.037                     | 153.3380  |
| 29   | 7      | 22     | 28    | 7       | 21      | E    | 0           | 182974.272   | 0.094                      | 153.3520  |
| 16   | 8      | 8      | 15    | 7       | 8       | E    | 0           | 183007.360   | -0.158                     | 94.9888   |
| 16   | 8      | 9      | 15    | 7       | 8       | A    | 0           | 183022.791   | -0.201                     | 94.9699   |
| 31   | 19     | 12     | 30    | 19      | 11      | A    | 0           | 183050.933   | 0.302                      | 224.5662  |
| 31   | 19     | 13     | 30    | 19      | 12      | A    | 0           | 183050.933   | 0.302                      | 224.5662  |
| 31   | 18     | 13     | 30    | 18      | 12      | E    | 1           | 183088.363   | 0.107                      | 334.0797  |
| 31   | 18     | 14     | 30    | 18      | 13      | E    | 1           | 183091.258   | -0.006                     | 333.5257  |
| 31   | 18     | 13     | 30    | 18      | 12      | A    | 1           | 183123.428   | 0.025                      | 333.5307  |
| 31   | 18     | 14     | 30    | 18      | 13      | A    | 1           | 183123.428   | 0.025                      | 333.5307  |
| 31   | 18     | 13     | 30    | 18      | 12      | A    | 0           | 183213.185   | 0.008                      | 217.2562  |
| 31   | 18     | 14     | 30    | 18      | 13      | A    | 0           | 183213.185   | 0.008                      | 217.2562  |
| 31   | 18     | 13     | 30    | 18      | 12      | E    | 0           | 183214.257   | 0.030                      | 217.2564  |
| 31   | 18     | 14     | 30    | 18      | 13      | E    | 0           | 183214.257   | 0.030                      | 217.2391  |
| 27   | 16     | 11     | 27    | 15      | 12      | E    | 0           | 183237.939   | -0.284                     | 180.5744  |
| 31   | 17     | 14     | 30    | 17      | 13      | E    | 1           | 183274.665   | 0.206                      | 327.1682  |
| 31   | 17     | 15     | 30    | 17      | 14      | E    | 1           | 183283.686   | 0.031                      | 326.5822  |
| 31   | 17     | 15     | 30    | 17      | 14      | A    | 1           | 183318.582   | -0.010                     | 326.6615  |
| 31   | 17     | 14     | 30    | 17      | 13      | A    | 1           | 183318.582   | -0.010                     | 326.6615  |
| 31   | 17     | 14     | 30    | 17      | 13      | A    | 0           | 183405.216   | -0.046                     | 210.3502  |

| $J'$ | $K'_a$ | $K'_c$ | $J''$ | $K''_a$ | $K''_c$ | Sym. | $v_{tCH_3}$ | $\nu_{Obs.}$ | $\nu_{Obs.} - \nu_{Calc.}$ | $E_{low}$ |
|------|--------|--------|-------|---------|---------|------|-------------|--------------|----------------------------|-----------|
| 31   | 17     | 15     | 30    | 17      | 14      | A    | 0           | 183405.216   | -0.046                     | 210.3502  |
| 31   | 17     | 14     | 30    | 17      | 13      | E    | 0           | 183406.635   | 0.140                      | 210.3528  |
| 31   | 17     | 15     | 30    | 17      | 14      | E    | 0           | 183406.635   | 0.140                      | 210.3344  |
| 14   | 9      | 5      | 13    | 8       | 5       | E    | 0           | 183412.388   | -0.066                     | 92.2037   |
| 14   | 9      | 6      | 13    | 8       | 5       | A    | 0           | 183443.817   | 0.115                      | 92.1853   |
| 14   | 9      | 5      | 13    | 8       | 6       | A    | 0           | 183443.817   | 0.115                      | 92.1853   |
| 30   | 6      | 24     | 30    | 5       | 26      | E    | 0           | 183451.836   | 0.241                      | 157.6261  |
| 31   | 16     | 15     | 30    | 16      | 14      | E    | 1           | 183497.088   | 0.058                      | 320.6574  |
| 31   | 16     | 16     | 30    | 16      | 15      | E    | 1           | 183514.368   | 0.038                      | 320.0480  |
| 31   | 16     | 15     | 30    | 16      | 14      | A    | 1           | 183551.955   | 0.045                      | 320.2007  |
| 31   | 16     | 16     | 30    | 16      | 15      | A    | 1           | 183551.955   | 0.045                      | 320.2007  |
| 12   | 10     | 3      | 11    | 9       | 3       | E    | 0           | 183573.609   | 0.286                      | 90.6320   |
| 31   | 16     | 15     | 30    | 16      | 14      | A    | 0           | 183635.131   | 0.028                      | 203.8501  |
| 31   | 16     | 16     | 30    | 16      | 15      | A    | 0           | 183635.131   | 0.028                      | 203.8501  |
| 31   | 16     | 15     | 30    | 16      | 14      | E    | 0           | 183636.711   | 0.168                      | 203.8549  |
| 31   | 16     | 16     | 30    | 16      | 15      | E    | 0           | 183636.711   | 0.168                      | 203.8358  |
| 12   | 10     | 3      | 11    | 9       | 2       | A    | 0           | 183643.377   | 0.272                      | 90.6320   |
| 12   | 10     | 2      | 11    | 9       | 3       | A    | 0           | 183643.377   | 0.272                      | 90.6320   |
| 30   | 6      | 24     | 29    | 6       | 23      | A    | 1           | 183645.866   | -0.094                     | 274.3310  |
| 31   | 15     | 16     | 30    | 15      | 15      | E    | 1           | 183767.019   | 0.078                      | 314.5499  |
| 31   | 15     | 17     | 30    | 15      | 16      | E    | 1           | 183794.959   | 0.026                      | 313.9260  |
| 31   | 15     | 17     | 30    | 15      | 16      | A    | 1           | 183834.918   | 0.018                      | 314.1501  |
| 31   | 15     | 16     | 30    | 15      | 15      | A    | 1           | 183834.918   | 0.018                      | 314.1501  |
| 31   | 15     | 16     | 30    | 15      | 15      | A    | 0           | 183914.151   | 0.014                      | 197.7584  |
| 31   | 15     | 17     | 30    | 15      | 16      | A    | 0           | 183914.151   | 0.014                      | 197.7584  |
| 31   | 15     | 16     | 30    | 15      | 15      | E    | 0           | 183916.016   | 0.200                      | 197.7655  |
| 31   | 15     | 17     | 30    | 15      | 16      | E    | 0           | 183916.016   | 0.200                      | 197.7460  |
| 30   | 6      | 24     | 29    | 6       | 23      | E    | 0           | 183972.458   | -0.065                     | 157.6087  |
| 30   | 6      | 24     | 29    | 6       | 23      | A    | 0           | 183985.222   | -0.047                     | 157.5948  |
| 30   | 6      | 24     | 29    | 6       | 23      | E    | 1           | 184009.277   | -0.628                     | 273.8935  |
| 31   | 14     | 17     | 30    | 14      | 16      | E    | 1           | 184100.003   | 0.086                      | 308.8493  |
| 31   | 14     | 18     | 30    | 14      | 17      | E    | 1           | 184142.216   | -0.152                     | 308.2204  |
| 13   | 11     | 3      | 12    | 10      | 2       | E    | 1           | 184142.216   | -0.152                     | 213.4689  |
| 31   | 14     | 18     | 30    | 14      | 17      | A    | 1           | 184184.229   | 0.047                      | 308.5131  |
| 31   | 14     | 17     | 30    | 14      | 16      | A    | 1           | 184184.229   | 0.047                      | 308.5131  |
| 31   | 14     | 17     | 30    | 14      | 16      | A    | 0           | 184258.850   | 0.031                      | 192.0789  |
| 31   | 14     | 18     | 30    | 14      | 17      | A    | 0           | 184258.850   | 0.031                      | 192.0789  |
| 31   | 14     | 17     | 30    | 14      | 16      | E    | 0           | 184260.384   | 0.256                      | 192.0881  |
| 31   | 14     | 18     | 30    | 14      | 17      | E    | 0           | 184261.607   | 0.177                      | 192.0684  |
| 43   | 3      | 40     | 43    | 2       | 41      | E    | 0           | 184271.855   | -0.141                     | 234.5584  |
| 43   | 4      | 40     | 43    | 2       | 41      | E    | 0           | 184271.855   | -0.141                     | 234.5584  |
| 43   | 3      | 40     | 43    | 3       | 41      | E    | 0           | 184271.855   | -0.141                     | 234.5584  |
| 43   | 4      | 40     | 43    | 2       | 41      | A    | 0           | 184310.805   | -0.234                     | 234.5450  |
| 43   | 3      | 40     | 43    | 2       | 41      | A    | 0           | 184310.805   | -0.234                     | 234.5450  |
| 43   | 3      | 40     | 43    | 3       | 41      | A    | 0           | 184310.805   | -0.234                     | 234.5450  |
| 43   | 4      | 40     | 43    | 3       | 41      | A    | 0           | 184310.805   | -0.234                     | 234.5450  |
| 17   | 4      | 13     | 16    | 3       | 14      | A    | 0           | 184357.317   | -0.306                     | 89.8037   |
| 43   | 4      | 40     | 43    | 3       | 41      | E    | 1           | 184498.521   | -0.363                     | 350.8375  |
| 43   | 3      | 40     | 43    | 3       | 41      | E    | 1           | 184498.521   | -0.363                     | 350.8375  |
| 43   | 4      | 40     | 43    | 2       | 41      | E    | 1           | 184498.521   | -0.363                     | 350.8375  |
| 43   | 3      | 40     | 43    | 2       | 41      | E    | 1           | 184498.521   | -0.363                     | 350.8375  |
| 31   | 13     | 18     | 30    | 13      | 17      | E    | 1           | 184519.535   | 0.087                      | 303.5609  |
| 34   | 18     | 17     | 33    | 18      | 15      | E    | 1           | 184548.914   | -0.666                     | 353.0026  |
| 31   | 13     | 19     | 30    | 13      | 18      | E    | 1           | 184581.517   | -0.027                     | 302.9368  |
| 31   | 13     | 19     | 30    | 13      | 18      | A    | 1           | 184624.795   | 0.041                      | 303.2941  |
| 31   | 13     | 18     | 30    | 13      | 17      | A    | 1           | 184624.795   | 0.041                      | 303.2941  |
| 32   | 5      | 27     | 31    | 6       | 26      | A    | 1           | 184655.159   | -0.001                     | 283.7487  |
| 31   | 7      | 25     | 30    | 7       | 24      | A    | 1           | 184689.210   | -0.012                     | 280.8098  |
| 31   | 13     | 18     | 30    | 13      | 17      | A    | 0           | 184693.909   | 0.054                      | 186.8166  |
| 31   | 13     | 19     | 30    | 13      | 18      | A    | 0           | 184693.909   | 0.054                      | 186.8166  |
| 31   | 13     | 18     | 30    | 13      | 17      | E    | 0           | 184695.401   | 0.210                      | 186.8280  |
| 31   | 13     | 19     | 30    | 13      | 18      | E    | 0           | 184697.301   | 0.171                      | 186.8083  |
| 32   | 6      | 26     | 31    | 7       | 25      | E    | 1           | 184766.413   | 0.575                      | 286.5806  |
| 32   | 5      | 27     | 31    | 6       | 26      | E    | 1           | 184782.706   | 0.009                      | 283.3495  |
| 32   | 5      | 27     | 31    | 6       | 26      | E    | 0           | 184805.409   | 0.385                      | 167.0510  |
| 32   | 5      | 27     | 31    | 6       | 26      | A    | 0           | 184807.987   | 0.050                      | 167.0385  |
| 31   | 7      | 25     | 30    | 7       | 24      | E    | 0           | 184872.039   | 0.016                      | 164.1198  |
| 32   | 6      | 26     | 31    | 7       | 25      | A    | 0           | 184874.346   | 0.135                      | 170.2745  |
| 31   | 7      | 25     | 30    | 7       | 24      | A    | 0           | 184876.526   | 0.115                      | 164.1077  |
| 19   | 7      | 13     | 18    | 6       | 12      | A    | 1           | 184879.308   | 0.202                      | 219.4781  |
| 32   | 6      | 26     | 31    | 7       | 25      | E    | 0           | 184890.914   | 0.161                      | 170.2865  |
| 31   | 7      | 25     | 30    | 7       | 24      | E    | 1           | 184928.356   | -0.019                     | 280.4121  |
| 48   | 17     | 31     | 48    | 16      | 32      | E    | 0           | 185062.775   | 0.231                      | 345.4582  |
| 31   | 12     | 19     | 30    | 12      | 18      | E    | 1           | 185062.775   | 0.059                      | 298.6924  |
| 33   | 4      | 29     | 32    | 5       | 28      | A    | 1           | 185147.760   | -0.263                     | 286.2047  |
| 33   | 4      | 29     | 32    | 4       | 28      | A    | 1           | 185194.253   | 0.006                      | 286.2031  |
| 31   | 12     | 19     | 30    | 12      | 18      | A    | 1           | 185198.108   | 0.088                      | 298.5008  |
| 34   | 3      | 31     | 33    | 3       | 30      | A    | 1           | 185218.046   | -0.088                     | 288.1644  |
| 34   | 4      | 31     | 33    | 4       | 30      | A    | 1           | 185218.046   | -0.088                     | 288.1644  |
| 33   | 5      | 29     | 32    | 4       | 28      | A    | 1           | 185220.429   | 0.202                      | 286.2031  |
| 32   | 6      | 27     | 31    | 6       | 26      | A    | 1           | 185235.362   | -0.101                     | 283.7487  |
| 31   | 12     | 20     | 30    | 12      | 19      | A    | 0           | 185257.405   | 0.110                      | 181.9796  |
| 31   | 12     | 19     | 30    | 12      | 18      | A    | 0           | 185260.059   | 0.079                      | 181.9797  |
| 31   | 12     | 19     | 30    | 12      | 18      | E    | 0           | 185260.059   | 0.092                      | 181.9928  |
| 31   | 12     | 20     | 30    | 12      | 19      | E    | 0           | 185262.891   | 0.083                      | 181.9737  |
| 33   | 4      | 29     | 32    | 5       | 28      | E    | 1           | 185315.196   | -0.156                     | 285.7966  |
| 33   | 4      | 29     | 32    | 5       | 28      | E    | 0           | 185324.739   | -0.091                     | 169.4977  |
| 33   | 4      | 29     | 32    | 5       | 28      | A    | 0           | 185329.837   | -0.093                     | 169.4849  |
| 33   | 5      | 29     | 32    | 5       | 28      | E    | 1           | 185345.798   | -0.029                     | 285.7966  |
| 34   | 4      | 31     | 33    | 4       | 30      | E    | 1           | 185350.738   | -0.008                     | 287.7380  |
| 34   | 3      | 31     | 33    | 3       | 30      | E    | 1           | 185350.738   | -0.008                     | 287.7380  |
| 33   | 5      | 29     | 32    | 5       | 28      | E    | 0           | 185353.713   | 0.015                      | 169.4977  |
| 33   | 5      | 29     | 32    | 5       | 28      | A    | 0           | 185359.006   | 0.030                      | 169.4849  |
| 35   | 2      | 33     | 34    | 2       | 32      | A    | 1           | 185361.408   | -0.011                     | 289.6683  |
| 35   | 3      | 33     | 34    | 2       | 32      | A    | 1           | 185361.408   | -0.011                     | 289.6683  |
| 35   | 2      | 33     | 34    | 3       | 32      | A    | 1           | 185361.408   | -0.011                     | 289.6683  |
| 35   | 3      | 33     | 34    | 3       | 32      | A    | 1           | 185361.408   | -0.011                     | 289.6683  |
| 34   | 3      | 31     | 33    | 3       | 30      | E    | 0           | 185369.350   | -0.244                     | 171.4422  |
| 34   | 4      | 31     | 33    | 4       | 30      | E    | 0           | 185369.350   | -0.244                     | 171.4422  |
| 33   | 4      | 29     | 32    | 4       | 28      | E    | 1           | 185369.350   | 0.226                      | 285.7948  |
| 34   | 3      | 31     | 33    | 3       | 30      | A    | 0           | 185373.677   | 0.008                      | 171.4288  |
| 34   | 4      | 31     | 33    | 4       | 30      | A    | 0           | 185373.677   | 0.008                      | 171.4289  |
| 33   | 4      | 29     | 32    | 4       | 28      | E    | 0           | 185376.067   | 0.107                      | 169.4960  |
| 20   | 5      | 16     | 19    | 3       | 16      | E    | 0           | 185381.357   | 0.451                      | 102.1034  |
| 33   | 5      | 29     | 32    | 4       | 28      | E    | 1           | 185399.491   | -0.107                     | 285.7948  |
| 33   | 5      | 29     | 32    | 4       | 28      | E    | 0           | 185404.544   | -0.283                     | 169.4960  |
| 33   | 5      | 29     | 32    | 4       | 28      | A    | 0           | 185410.481   | 0.075                      | 169.4832  |
| 32   | 6      | 27     | 31    | 6       | 26      | E    | 0           | 185438.332   | 0.008                      | 167.0510  |
| 32   | 6      | 27     | 31    | 6       | 26      | E    | 1           | 185443.065   | -0.243                     | 283.3495  |
| 32   | 6      | 27     | 31    | 6       | 26      | A    | 0           | 185444.545   | 0.064                      | 167.0385  |
| 35   | 3      | 33     | 34    | 3       | 32      | E    | 1           | 185456.485   | -0.043                     | 289.2146  |
| 35   | 2      | 33     | 34    | 3       | 32      | E    | 1           | 185456.485   | -0.043                     | 289.2146  |
| 35   | 3      | 33     | 34    | 2       | 32      | E    | 1           | 185456.485   | -0.043                     | 289.2146  |
| 35   | 2      | 33     | 34    | 2       | 32      | E    | 1           | 185456.485   | -0.043                     | 289.2146  |
| 35   | 2      | 33     | 34    | 2       | 32      | E    | 0           | 185485.033   | -0.051                     | 172.9248  |
| 35   | 3      | 33     | 34    | 2       | 32      | E    | 0           | 185485.033   | -0.051                     | 172.9248  |

| $J'$ | $K'_a$ | $K'_c$ | $J''$ | $K''_a$ | $K''_c$ | Sym. | $v_{tCH_3}$ | $\nu_{Obs.}$ | $\nu_{Obs.} - \nu_{Calc.}$ | $E_{low}$ |
|------|--------|--------|-------|---------|---------|------|-------------|--------------|----------------------------|-----------|
| 35   | 2      | 33     | 34    | 3       | 32      | E    | 0           | 185485.033   | -0.051                     | 172.9248  |
| 35   | 3      | 33     | 34    | 3       | 32      | E    | 0           | 185485.033   | -0.051                     | 172.9248  |
| 35   | 2      | 33     | 34    | 2       | 32      | A    | 0           | 185487.944   | -0.057                     | 172.9106  |
| 35   | 3      | 33     | 34    | 2       | 32      | A    | 0           | 185487.944   | -0.057                     | 172.9106  |
| 35   | 2      | 33     | 34    | 3       | 32      | A    | 0           | 185487.944   | -0.057                     | 172.9106  |
| 35   | 3      | 33     | 34    | 3       | 32      | A    | 0           | 185487.944   | -0.057                     | 172.9106  |
| 45   | 4      | 41     | 45    | 3       | 42      | E    | 0           | 185504.068   | 0.033                      | 256.5395  |
| 45   | 5      | 41     | 45    | 3       | 42      | E    | 0           | 185504.068   | 0.033                      | 256.5395  |
| 45   | 5      | 41     | 45    | 4       | 42      | E    | 0           | 185504.068   | 0.033                      | 256.5395  |
| 45   | 4      | 41     | 45    | 3       | 42      | A    | 0           | 185538.747   | -0.260                     | 256.5277  |
| 45   | 5      | 41     | 45    | 3       | 42      | A    | 0           | 185538.747   | -0.260                     | 256.5277  |
| 45   | 5      | 41     | 45    | 4       | 42      | A    | 0           | 185538.747   | -0.260                     | 256.5277  |
| 36   | 1      | 35     | 35    | 1       | 34      | A    | 1           | 185553.355   | -0.046                     | 290.7452  |
| 36   | 2      | 35     | 35    | 1       | 34      | A    | 1           | 185553.355   | -0.046                     | 290.7452  |
| 36   | 1      | 35     | 35    | 2       | 34      | A    | 1           | 185553.355   | -0.046                     | 290.7452  |
| 36   | 2      | 35     | 35    | 2       | 34      | A    | 1           | 185553.355   | -0.046                     | 290.7452  |
| 36   | 2      | 35     | 35    | 2       | 34      | E    | 1           | 185610.319   | -0.057                     | 290.2555  |
| 36   | 1      | 35     | 35    | 2       | 34      | E    | 1           | 185610.319   | -0.057                     | 290.2555  |
| 36   | 2      | 35     | 35    | 1       | 34      | E    | 1           | 185610.319   | -0.057                     | 290.2555  |
| 36   | 1      | 35     | 35    | 1       | 34      | E    | 1           | 185610.319   | -0.057                     | 290.2555  |
| 32   | 5      | 27     | 31    | 5       | 26      | A    | 1           | 185614.053   | -0.047                     | 283.7167  |
| 36   | 1      | 35     | 35    | 1       | 34      | E    | 0           | 185648.437   | -0.051                     | 173.9746  |
| 36   | 2      | 35     | 35    | 1       | 34      | E    | 0           | 185648.437   | -0.051                     | 173.9746  |
| 36   | 1      | 35     | 35    | 2       | 34      | E    | 0           | 185648.437   | -0.051                     | 173.9746  |
| 36   | 2      | 35     | 35    | 2       | 34      | E    | 0           | 185648.437   | -0.051                     | 173.9746  |
| 36   | 1      | 35     | 35    | 1       | 34      | A    | 0           | 185650.257   | 0.028                      | 173.9593  |
| 36   | 2      | 35     | 35    | 1       | 34      | A    | 0           | 185650.257   | 0.028                      | 173.9593  |
| 36   | 2      | 35     | 35    | 2       | 34      | A    | 0           | 185650.257   | 0.028                      | 173.9593  |
| 36   | 2      | 35     | 35    | 2       | 34      | A    | 0           | 185650.257   | 0.028                      | 173.9593  |
| 45   | 5      | 41     | 45    | 4       | 42      | E    | 1           | 185673.541   | -0.331                     | 372.8237  |
| 45   | 4      | 41     | 45    | 4       | 42      | E    | 1           | 185673.541   | -0.331                     | 372.8237  |
| 45   | 5      | 41     | 45    | 3       | 42      | E    | 1           | 185673.541   | -0.331                     | 372.8237  |
| 45   | 4      | 41     | 45    | 3       | 42      | E    | 1           | 185673.541   | -0.331                     | 372.8237  |
| 40   | 1      | 39     | 40    | 0       | 40      | E    | 0           | 185683.594   | -0.203                     | 200.3969  |
| 40   | 2      | 39     | 40    | 1       | 40      | E    | 0           | 185683.594   | -0.203                     | 200.3969  |
| 37   | 0      | 37     | 36    | 0       | 36      | A    | 1           | 185766.898   | -0.008                     | 291.4140  |
| 37   | 1      | 37     | 36    | 0       | 36      | A    | 1           | 185766.898   | -0.008                     | 291.4140  |
| 37   | 0      | 37     | 36    | 1       | 36      | A    | 1           | 185766.898   | -0.008                     | 291.4140  |
| 37   | 1      | 37     | 36    | 1       | 36      | A    | 1           | 185766.898   | -0.008                     | 291.4140  |
| 37   | 0      | 37     | 36    | 1       | 36      | E    | 1           | 185782.940   | -0.117                     | 290.8796  |
| 37   | 1      | 37     | 36    | 0       | 36      | E    | 1           | 185782.940   | -0.117                     | 290.8796  |
| 37   | 0      | 37     | 36    | 0       | 36      | E    | 1           | 185782.940   | -0.117                     | 290.8796  |
| 31   | 11     | 20     | 30    | 11      | 19      | E    | 1           | 185793.960   | 0.002                      | 294.2561  |
| 37   | 0      | 37     | 36    | 0       | 36      | A    | 0           | 185831.566   | -0.292                     | 174.5936  |
| 37   | 1      | 37     | 36    | 0       | 36      | A    | 0           | 185831.566   | -0.292                     | 174.5936  |
| 37   | 0      | 37     | 36    | 1       | 36      | A    | 0           | 185831.566   | -0.292                     | 174.5936  |
| 37   | 1      | 37     | 36    | 1       | 36      | A    | 0           | 185831.566   | -0.292                     | 174.5936  |
| 37   | 0      | 37     | 36    | 0       | 36      | E    | 0           | 185831.566   | 0.199                      | 174.6102  |
| 37   | 1      | 37     | 36    | 0       | 36      | E    | 0           | 185831.566   | 0.199                      | 174.6102  |
| 37   | 0      | 37     | 36    | 1       | 36      | E    | 0           | 185831.566   | 0.199                      | 174.6102  |
| 32   | 5      | 27     | 31    | 5       | 26      | E    | 0           | 185846.685   | 0.026                      | 167.0163  |
| 32   | 5      | 27     | 31    | 5       | 26      | A    | 0           | 185854.658   | 0.041                      | 167.0036  |
| 32   | 5      | 27     | 31    | 5       | 26      | E    | 1           | 185864.894   | 0.272                      | 283.3135  |
| 31   | 11     | 21     | 30    | 11      | 20      | E    | 1           | 185928.534   | 0.103                      | 293.6739  |
| 31   | 11     | 21     | 30    | 11      | 20      | A    | 1           | 185951.040   | 0.007                      | 294.1443  |
| 31   | 11     | 20     | 30    | 11      | 19      | A    | 1           | 185988.258   | -0.032                     | 294.1455  |
| 31   | 11     | 21     | 30    | 11      | 20      | A    | 0           | 186004.788   | 0.070                      | 177.5798  |
| 31   | 11     | 20     | 30    | 11      | 19      | E    | 0           | 186024.942   | 0.087                      | 177.5953  |
| 31   | 11     | 21     | 30    | 11      | 20      | E    | 0           | 186025.909   | 0.038                      | 177.5769  |
| 31   | 11     | 20     | 30    | 11      | 19      | A    | 0           | 186039.325   | 0.062                      | 177.5810  |
| 30   | 8      | 22     | 29    | 8       | 21      | E    | 1           | 186103.521   | 0.029                      | 277.8001  |
| 32   | 6      | 27     | 31    | 5       | 26      | A    | 1           | 186194.430   | 0.028                      | 283.7167  |
| 12   | 6      | 7      | 11    | 4       | 8       | E    | 1           | 186226.182   | 0.080                      | 194.0392  |
| 47   | 5      | 42     | 47    | 4       | 43      | E    | 0           | 186408.776   | 0.286                      | 279.5446  |
| 47   | 6      | 42     | 47    | 4       | 43      | E    | 0           | 186408.776   | 0.286                      | 279.5446  |
| 47   | 6      | 42     | 47    | 5       | 43      | E    | 0           | 186408.776   | 0.286                      | 279.5446  |
| 47   | 5      | 42     | 47    | 4       | 43      | A    | 0           | 186439.521   | 0.338                      | 279.5343  |
| 47   | 6      | 42     | 47    | 4       | 43      | A    | 0           | 186439.521   | 0.338                      | 279.5343  |
| 47   | 5      | 42     | 47    | 5       | 43      | A    | 0           | 186439.521   | 0.338                      | 279.5343  |
| 47   | 6      | 42     | 47    | 5       | 43      | A    | 0           | 186439.521   | 0.338                      | 279.5343  |
| 32   | 6      | 27     | 31    | 5       | 26      | E    | 0           | 186480.057   | 0.099                      | 167.0163  |
| 32   | 6      | 27     | 31    | 5       | 26      | A    | 0           | 186491.029   | -0.133                     | 167.0036  |
| 47   | 6      | 42     | 47    | 5       | 43      | E    | 1           | 186518.503   | -0.126                     | 395.8321  |
| 47   | 5      | 42     | 47    | 5       | 43      | E    | 1           | 186518.503   | -0.126                     | 395.8321  |
| 47   | 6      | 42     | 47    | 4       | 43      | E    | 1           | 186518.503   | -0.126                     | 395.8321  |
| 47   | 5      | 42     | 47    | 4       | 43      | E    | 1           | 186518.503   | -0.126                     | 395.8321  |
| 32   | 6      | 27     | 31    | 5       | 26      | E    | 1           | 186525.146   | -0.088                     | 283.3135  |
| 31   | 10     | 21     | 30    | 10      | 20      | E    | 1           | 186846.658   | 0.042                      | 290.2728  |
| 31   | 10     | 22     | 30    | 10      | 21      | A    | 1           | 186910.074   | -0.114                     | 290.2413  |
| 19   | 6      | 13     | 18    | 5       | 14      | E    | 1           | 186927.904   | -0.813                     | 216.7965  |
| 14   | 3      | 12     | 13    | 1       | 13      | A    | 0           | 186957.981   | 0.198                      | 77.6624   |
| 31   | 10     | 22     | 30    | 10      | 21      | A    | 0           | 186957.981   | 0.198                      | 173.6343  |
| 49   | 7      | 43     | 49    | 5       | 44      | A    | 0           | 186983.905   | 0.247                      | 303.5560  |
| 49   | 7      | 43     | 49    | 6       | 44      | A    | 0           | 186983.905   | 0.247                      | 303.5560  |
| 14   | 3      | 12     | 13    | 1       | 13      | E    | 1           | 187004.504   | 0.204                      | 193.9726  |
| 31   | 10     | 22     | 30    | 10      | 21      | E    | 0           | 187008.229   | 0.074                      | 173.6379  |
| 31   | 10     | 22     | 30    | 10      | 21      | E    | 1           | 187049.431   | 0.105                      | 289.7304  |
| 30   | 8      | 22     | 29    | 8       | 21      | A    | 0           | 187198.378   | 0.100                      | 161.4017  |
| 30   | 8      | 22     | 29    | 8       | 21      | E    | 0           | 187207.349   | 0.083                      | 161.4141  |
| 31   | 10     | 21     | 30    | 10      | 20      | E    | 0           | 187250.163   | 0.031                      | 173.6596  |
| 30   | 8      | 22     | 29    | 8       | 21      | A    | 1           | 187251.896   | -0.107                     | 278.1027  |
| 31   | 10     | 21     | 30    | 10      | 20      | A    | 1           | 187266.646   | 0.064                      | 290.2555  |
| 31   | 10     | 21     | 30    | 10      | 20      | A    | 0           | 187291.634   | 0.088                      | 173.6476  |
| 31   | 8      | 24     | 30    | 8       | 23      | A    | 1           | 187342.813   | -0.017                     | 283.7312  |
| 31   | 8      | 24     | 30    | 8       | 23      | A    | 0           | 187465.971   | 0.144                      | 167.0512  |
| 31   | 8      | 24     | 30    | 8       | 23      | E    | 0           | 187465.971   | -0.038                     | 167.0624  |
| 42   | 2      | 40     | 42    | 1       | 41      | E    | 0           | 187517.157   | -0.412                     | 220.7942  |
| 42   | 3      | 40     | 42    | 1       | 41      | E    | 0           | 187517.157   | -0.412                     | 220.7942  |
| 42   | 3      | 40     | 42    | 2       | 41      | E    | 0           | 187517.157   | -0.412                     | 220.7942  |
| 42   | 2      | 40     | 42    | 1       | 41      | A    | 0           | 187561.238   | -0.373                     | 220.7793  |
| 42   | 3      | 40     | 42    | 1       | 41      | A    | 0           | 187561.238   | -0.373                     | 220.7793  |
| 42   | 3      | 40     | 42    | 2       | 41      | A    | 0           | 187561.238   | -0.373                     | 220.7793  |
| 17   | 8      | 10     | 16    | 7       | 9       | A    | 1           | 187687.082   | 0.290                      | 214.8863  |
| 31   | 9      | 23     | 30    | 9       | 22      | A    | 1           | 187741.459   | -0.079                     | 286.7961  |
| 31   | 9      | 23     | 30    | 9       | 22      | A    | 0           | 187805.878   | 0.044                      | 170.1491  |
| 31   | 9      | 23     | 30    | 9       | 22      | E    | 0           | 187815.204   | 0.052                      | 170.1583  |
| 31   | 8      | 24     | 30    | 8       | 23      | E    | 1           | 187963.378   | 0.127                      | 283.3151  |
| 32   | 30     | 2      | 31    | 30      | 1       | E    | 1           | 187966.260   | -0.457                     | 454.2365  |
| 32   | 30     | 2      | 31    | 30      | 1       | A    | 1           | 187967.889   | -0.196                     | 453.6112  |
| 32   | 30     | 3      | 31    | 30      | 2       | A    | 1           | 187967.889   | -0.196                     | 453.6112  |
| 32   | 30     | 3      | 31    | 30      | 2       | E    | 1           | 187975.388   | -0.087                     | 454.0149  |
| 31   | 6      | 25     | 30    | 6       | 24      | A    | 1           | 187995.829   | 0.003                      | 280.4568  |
| 44   | 3      | 41     | 44    | 2       | 42      | A    | 1           | 188008.169   | -0.081                     | 358.9332  |
| 44   | 4      | 41     | 44    | 2       | 42      | A    | 1           | 188008.169   | -0.081                     | 358.9332  |



| $J'$ | $K'_a$ | $K'_c$ | $J''$ | $K''_a$ | $K''_c$ | Sym. | $v_{tCH_3}$ | $\nu_{Obs.}$ | $\nu_{Obs.} - \nu_{Calc.}$ | $E_{low}$ |
|------|--------|--------|-------|---------|---------|------|-------------|--------------|----------------------------|-----------|
| 44   | 3      | 41     | 44    | 3       | 42      | A    | 1           | 188008.169   | -0.081                     | 358.9332  |
| 44   | 4      | 41     | 44    | 3       | 42      | A    | 1           | 188008.169   | -0.081                     | 358.9332  |
| 32   | 29     | 4      | 31    | 29      | 3       | E    | 1           | 188024.069   | -0.132                     | 442.3511  |
| 32   | 28     | 5      | 31    | 28      | 4       | A    | 1           | 188071.804   | -0.158                     | 430.5777  |
| 32   | 28     | 4      | 31    | 28      | 3       | A    | 1           | 188071.804   | -0.158                     | 430.5777  |
| 32   | 30     | 2      | 31    | 30      | 1       | A    | 0           | 188080.821   | -0.368                     | 337.4561  |
| 32   | 30     | 3      | 31    | 30      | 2       | A    | 0           | 188080.821   | -0.368                     | 337.4561  |
| 32   | 30     | 3      | 31    | 30      | 2       | E    | 0           | 188080.821   | -0.392                     | 337.4364  |
| 32   | 29     | 3      | 31    | 29      | 2       | A    | 0           | 188129.721   | -0.346                     | 325.7558  |
| 32   | 29     | 4      | 31    | 29      | 3       | A    | 0           | 188129.721   | -0.346                     | 325.7558  |
| 32   | 29     | 4      | 31    | 29      | 3       | E    | 0           | 188129.721   | -0.440                     | 325.7367  |
| 32   | 27     | 6      | 31    | 27      | 5       | A    | 1           | 188131.480   | 0.003                      | 419.6653  |
| 32   | 27     | 5      | 31    | 27      | 4       | A    | 1           | 188131.480   | 0.003                      | 419.6653  |
| 32   | 27     | 6      | 31    | 27      | 5       | E    | 1           | 188135.033   | 0.104                      | 420.2126  |
| 15   | 9      | 7      | 14    | 8       | 6       | A    | 1           | 188154.297   | 0.285                      | 211.6553  |
| 15   | 9      | 6      | 14    | 8       | 7       | A    | 1           | 188154.297   | 0.285                      | 211.6553  |
| 32   | 28     | 4      | 31    | 28      | 3       | A    | 0           | 188183.081   | -0.272                     | 314.4531  |
| 32   | 28     | 5      | 31    | 28      | 4       | A    | 0           | 188183.081   | -0.272                     | 314.4531  |
| 32   | 28     | 5      | 31    | 28      | 4       | E    | 0           | 188183.081   | -0.443                     | 314.4347  |
| 32   | 26     | 7      | 31    | 26      | 6       | E    | 1           | 188185.847   | -0.126                     | 409.6635  |
| 32   | 26     | 6      | 31    | 26      | 5       | A    | 1           | 188196.992   | -0.135                     | 409.1561  |
| 32   | 26     | 7      | 31    | 26      | 6       | A    | 1           | 188196.992   | -0.135                     | 409.1561  |
| 32   | 26     | 6      | 31    | 26      | 5       | E    | 1           | 188198.671   | 0.252                      | 409.7374  |
| 32   | 27     | 5      | 31    | 27      | 4       | A    | 0           | 188241.644   | -0.107                     | 303.5482  |
| 32   | 27     | 6      | 31    | 27      | 5       | A    | 0           | 188241.644   | -0.107                     | 303.5482  |
| 32   | 27     | 6      | 31    | 27      | 5       | E    | 0           | 188241.644   | -0.361                     | 303.5308  |
| 32   | 25     | 8      | 31    | 25      | 7       | E    | 1           | 188255.844   | -0.153                     | 399.5100  |
| 32   | 25     | 7      | 31    | 25      | 6       | E    | 1           | 188268.380   | -0.198                     | 399.6578  |
| 32   | 25     | 8      | 31    | 25      | 7       | A    | 1           | 188270.072   | 0.132                      | 399.0506  |
| 32   | 25     | 7      | 31    | 25      | 6       | A    | 1           | 188270.072   | 0.132                      | 399.0506  |
| 32   | 26     | 6      | 31    | 26      | 5       | A    | 0           | 188306.002   | -0.109                     | 293.0412  |
| 32   | 26     | 7      | 31    | 26      | 6       | A    | 0           | 188306.002   | -0.109                     | 293.0412  |
| 32   | 26     | 7      | 31    | 26      | 6       | E    | 0           | 188306.002   | -0.055                     | 293.0229  |
| 31   | 6      | 25     | 30    | 6       | 24      | E    | 0           | 188332.168   | -0.053                     | 163.7454  |
| 32   | 24     | 9      | 31    | 24      | 8       | E    | 1           | 188334.392   | 0.065                      | 389.7541  |
| 31   | 6      | 25     | 30    | 6       | 24      | A    | 0           | 188345.569   | -0.073                     | 163.7319  |
| 32   | 24     | 8      | 31    | 24      | 7       | E    | 1           | 188346.797   | 0.189                      | 389.9739  |
| 32   | 24     | 8      | 31    | 24      | 7       | A    | 1           | 188351.186   | 0.024                      | 389.3489  |
| 32   | 24     | 9      | 31    | 24      | 8       | A    | 1           | 188351.186   | 0.024                      | 389.3489  |
| 19   | 7      | 12     | 18    | 6       | 13      | A    | 0           | 188359.656   | -0.301                     | 102.6393  |
| 32   | 25     | 7      | 31    | 25      | 6       | A    | 0           | 188377.461   | 0.011                      | 282.9326  |
| 32   | 25     | 8      | 31    | 25      | 7       | A    | 0           | 188377.461   | 0.011                      | 282.9326  |
| 32   | 25     | 8      | 31    | 25      | 7       | E    | 0           | 188377.461   | -0.018                     | 282.9135  |
| 31   | 6      | 25     | 30    | 6       | 24      | E    | 1           | 188388.372   | -0.227                     | 280.0314  |
| 19   | 7      | 12     | 18    | 6       | 12      | E    | 1           | 188412.582   | 0.310                      | 219.1982  |
| 32   | 23     | 10     | 31    | 23      | 9       | E    | 1           | 188422.217   | -0.297                     | 380.3968  |
| 32   | 23     | 9      | 31    | 23      | 8       | E    | 1           | 188434.239   | 0.252                      | 380.6854  |
| 32   | 23     | 10     | 31    | 23      | 9       | A    | 1           | 188442.335   | 0.006                      | 380.0513  |
| 32   | 23     | 9      | 31    | 23      | 8       | A    | 1           | 188442.335   | 0.006                      | 380.0513  |
| 32   | 24     | 8      | 31    | 24      | 7       | A    | 0           | 188457.142   | 0.128                      | 273.2227  |
| 32   | 24     | 9      | 31    | 24      | 8       | A    | 0           | 188457.142   | 0.128                      | 273.2227  |
| 32   | 24     | 9      | 31    | 24      | 8       | E    | 0           | 188457.142   | -0.001                     | 273.2030  |
| 32   | 22     | 11     | 31    | 22      | 10      | E    | 1           | 188522.367   | -0.113                     | 371.4392  |
| 32   | 22     | 10     | 31    | 22      | 9       | E    | 1           | 188532.561   | 0.014                      | 371.7926  |
| 32   | 23     | 9      | 31    | 23      | 8       | A    | 0           | 188546.508   | 0.176                      | 263.9119  |
| 32   | 23     | 10     | 31    | 23      | 9       | A    | 0           | 188546.508   | 0.176                      | 263.9119  |
| 32   | 23     | 10     | 31    | 23      | 9       | E    | 0           | 188546.508   | -0.070                     | 263.8919  |
| 31   | 9      | 23     | 30    | 9       | 22      | E    | 1           | 188582.937   | 0.243                      | 286.2947  |
| 32   | 21     | 12     | 31    | 21      | 11      | E    | 1           | 188636.614   | -0.019                     | 362.8826  |
| 32   | 21     | 11     | 31    | 21      | 10      | E    | 1           | 188644.623   | 0.035                      | 363.2957  |
| 32   | 22     | 11     | 31    | 22      | 10      | E    | 0           | 188647.473   | -0.208                     | 254.9808  |
| 32   | 21     | 12     | 31    | 21      | 11      | A    | 1           | 188662.628   | 0.032                      | 362.6698  |
| 32   | 21     | 11     | 31    | 21      | 10      | A    | 1           | 188662.628   | 0.032                      | 362.6698  |
| 17   | 8      | 10     | 16    | 7       | 10      | E    | 0           | 188689.113   | -0.163                     | 98.1513   |
| 17   | 8      | 9      | 16    | 7       | 9       | E    | 0           | 188734.672   | -0.230                     | 98.1656   |
| 32   | 21     | 11     | 31    | 21      | 10      | A    | 0           | 188762.654   | 0.369                      | 246.4898  |
| 32   | 21     | 12     | 31    | 21      | 11      | A    | 0           | 188762.654   | 0.369                      | 246.4898  |
| 32   | 21     | 12     | 31    | 21      | 11      | E    | 0           | 188762.654   | -0.177                     | 246.4702  |
| 32   | 20     | 13     | 31    | 20      | 12      | E    | 1           | 188768.010   | -0.018                     | 354.7283  |
| 32   | 20     | 12     | 31    | 20      | 11      | E    | 1           | 188773.130   | 0.103                      | 355.1952  |
| 31   | 9      | 22     | 30    | 9       | 21      | E    | 1           | 188793.115   | 0.124                      | 286.7892  |
| 32   | 20     | 12     | 31    | 20      | 11      | A    | 1           | 188797.215   | 0.102                      | 354.5868  |
| 32   | 20     | 13     | 31    | 20      | 12      | A    | 1           | 188797.215   | 0.102                      | 354.5868  |
| 29   | 9      | 20     | 29    | 7       | 23      | E    | 1           | 188845.433   | 0.338                      | 274.4202  |
| 32   | 20     | 12     | 31    | 20      | 11      | A    | 0           | 188894.675   | 0.364                      | 238.3799  |
| 32   | 20     | 13     | 31    | 20      | 12      | A    | 0           | 188894.675   | 0.364                      | 238.3799  |
| 32   | 20     | 13     | 31    | 20      | 12      | E    | 0           | 188894.675   | -0.371                     | 238.3609  |
| 30   | 7      | 23     | 29    | 7       | 22      | E    | 1           | 188919.348   | -0.175                     | 275.7481  |
| 32   | 19     | 13     | 31    | 19      | 12      | E    | 1           | 188921.799   | 0.187                      | 347.4919  |
| 32   | 19     | 13     | 31    | 19      | 12      | A    | 1           | 188952.868   | 0.069                      | 346.9095  |
| 32   | 19     | 14     | 31    | 19      | 13      | A    | 1           | 188952.868   | 0.069                      | 346.9095  |
| 28   | 10     | 19     | 28    | 8       | 20      | A    | 1           | 188975.809   | 0.246                      | 272.1042  |
| 30   | 7      | 23     | 29    | 7       | 22      | A    | 1           | 189010.969   | -0.078                     | 276.1764  |
| 32   | 19     | 13     | 31    | 19      | 12      | A    | 0           | 189047.331   | 0.079                      | 230.6721  |
| 32   | 19     | 14     | 31    | 19      | 13      | A    | 0           | 189047.331   | 0.079                      | 230.6721  |
| 32   | 19     | 14     | 31    | 19      | 13      | E    | 0           | 189048.212   | 0.005                      | 230.6539  |
| 44   | 3      | 41     | 44    | 2       | 42      | E    | 0           | 189073.257   | -0.180                     | 242.2329  |
| 44   | 4      | 41     | 44    | 2       | 42      | E    | 0           | 189073.257   | -0.180                     | 242.2329  |
| 44   | 4      | 41     | 44    | 3       | 42      | E    | 0           | 189073.257   | -0.180                     | 242.2329  |
| 32   | 18     | 14     | 31    | 18      | 13      | E    | 1           | 189095.264   | 0.029                      | 340.1869  |
| 32   | 18     | 15     | 31    | 18      | 14      | E    | 1           | 189099.467   | -0.005                     | 339.6329  |
| 32   | 18     | 14     | 31    | 18      | 13      | A    | 1           | 189134.854   | 0.101                      | 339.6390  |
| 32   | 18     | 15     | 31    | 18      | 14      | A    | 1           | 189134.854   | 0.101                      | 339.6390  |
| 30   | 7      | 23     | 29    | 7       | 22      | E    | 0           | 189170.169   | -0.007                     | 159.4554  |
| 30   | 7      | 23     | 29    | 7       | 22      | A    | 0           | 189172.030   | -0.033                     | 159.4413  |
| 15   | 9      | 7      | 14    | 8       | 7       | E    | 0           | 189211.241   | 0.151                      | 94.9495   |
| 32   | 18     | 14     | 31    | 18      | 13      | A    | 0           | 189226.072   | -0.102                     | 223.3676  |
| 32   | 18     | 15     | 31    | 18      | 14      | A    | 0           | 189226.072   | -0.102                     | 223.3676  |
| 32   | 18     | 14     | 31    | 18      | 13      | E    | 0           | 189227.427   | 0.085                      | 223.3678  |
| 32   | 18     | 15     | 31    | 18      | 14      | E    | 0           | 189227.427   | 0.085                      | 223.3504  |
| 15   | 9      | 6      | 14    | 8       | 6       | E    | 0           | 189250.128   | 0.121                      | 94.9654   |
| 15   | 9      | 7      | 14    | 8       | 6       | A    | 0           | 189281.170   | -0.003                     | 94.9470   |
| 15   | 9      | 6      | 14    | 8       | 7       | A    | 0           | 189281.170   | -0.003                     | 94.9470   |
| 32   | 17     | 15     | 31    | 17      | 14      | E    | 1           | 189300.401   | 0.003                      | 333.2816  |
| 32   | 17     | 16     | 31    | 17      | 15      | E    | 1           | 189311.529   | 0.023                      | 332.6959  |
| 32   | 17     | 16     | 31    | 17      | 15      | A    | 1           | 189349.874   | 0.100                      | 332.7764  |
| 32   | 17     | 15     | 31    | 17      | 14      | A    | 1           | 189349.874   | 0.100                      | 332.7764  |
| 32   | 17     | 15     | 31    | 17      | 14      | A    | 0           | 189437.766   | -0.057                     | 216.4680  |
| 32   | 17     | 16     | 31    | 17      | 15      | A    | 0           | 189437.766   | -0.057                     | 216.4680  |
| 32   | 17     | 15     | 31    | 17      | 14      | E    | 0           | 189439.330   | 0.292                      | 216.4705  |
| 32   | 17     | 16     | 31    | 17      | 15      | E    | 0           | 189439.333   | -0.009                     | 216.4522  |
| 13   | 10     | 4      | 12    | 9       | 3       | A    | 0           | 189514.332   | 0.294                      | 92.9904   |
| 13   | 10     | 3      | 12    | 9       | 4       | A    | 0           | 189514.332   | 0.294                      | 92.9904   |
| 32   | 16     | 16     | 31    | 16      | 15      | E    | 1           | 189545.986   | 0.054                      | 326.7782  |
| 32   | 16     | 17     | 31    | 16      | 16      | E    | 1           | 189566.022   | -0.009                     | 326.1694  |
| 32   | 16     | 16     | 31    | 16      | 15      | A    | 1           | 189607.164   | 0.044                      | 326.3233  |

| $J'$ | $K'_a$ | $K'_c$ | $J''$ | $K''_a$ | $K''_c$ | Sym. | $v_{tCH_3}$ | $\nu_{Obs.}$ | $\nu_{Obs.} - \nu_{Calc.}$ | $E_{low}$ |
|------|--------|--------|-------|---------|---------|------|-------------|--------------|----------------------------|-----------|
| 32   | 16     | 17     | 31    | 16      | 16      | A    | 1           | 189607.164   | 0.044                      | 326.3233  |
| 32   | 16     | 16     | 31    | 16      | 15      | A    | 0           | 189691.355   | -0.026                     | 209.9755  |
| 32   | 16     | 17     | 31    | 16      | 16      | A    | 0           | 189691.355   | -0.026                     | 209.9755  |
| 32   | 16     | 16     | 31    | 16      | 15      | E    | 0           | 189693.093   | 0.119                      | 209.9804  |
| 32   | 16     | 17     | 31    | 16      | 16      | E    | 0           | 189693.093   | 0.119                      | 209.9613  |
| 36   | 8      | 28     | 35    | 9       | 27      | A    | 0           | 189758.902   | 0.107                      | 203.5249  |
| 33   | 5      | 28     | 32    | 6       | 27      | A    | 1           | 189835.692   | 0.321                      | 289.9275  |
| 32   | 15     | 17     | 31    | 15      | 16      | E    | 1           | 189844.255   | 0.102                      | 320.6797  |
| 11   | 11     | 1      | 10    | 10      | 1       | E    | 1           | 189871.449   | 0.262                      | 208.3742  |
| 32   | 15     | 18     | 31    | 15      | 17      | E    | 1           | 189876.111   | -0.012                     | 320.0568  |
| 32   | 7      | 26     | 31    | 7       | 25      | A    | 1           | 189902.283   | 0.007                      | 286.9704  |
| 32   | 15     | 18     | 31    | 15      | 17      | A    | 1           | 189919.836   | 0.076                      | 320.2822  |
| 32   | 15     | 17     | 31    | 15      | 16      | A    | 1           | 189919.836   | 0.076                      | 320.2822  |
| 31   | 9      | 22     | 30    | 9       | 21      | A    | 0           | 189973.830   | 0.084                      | 170.2620  |
| 31   | 9      | 22     | 30    | 9       | 21      | E    | 0           | 189976.795   | 0.085                      | 170.2727  |
| 33   | 5      | 28     | 32    | 6       | 27      | E    | 1           | 189992.281   | 0.016                      | 289.5353  |
| 32   | 15     | 17     | 31    | 15      | 16      | A    | 0           | 189999.674   | -0.023                     | 203.8931  |
| 32   | 15     | 18     | 31    | 15      | 17      | A    | 0           | 189999.674   | -0.023                     | 203.8931  |
| 32   | 15     | 18     | 31    | 15      | 17      | E    | 0           | 190002.162   | 0.127                      | 203.8807  |
| 33   | 5      | 28     | 32    | 6       | 27      | E    | 0           | 190007.702   | 0.147                      | 173.2366  |
| 20   | 7      | 14     | 19    | 6       | 13      | E    | 0           | 190007.702   | 0.147                      | 106.5847  |
| 33   | 5      | 28     | 32    | 6       | 27      | A    | 0           | 190012.108   | -0.022                     | 173.2243  |
| 31   | 9      | 22     | 30    | 9       | 21      | A    | 1           | 190019.898   | -0.027                     | 286.9157  |
| 41   | 17     | 25     | 41    | 16      | 25      | E    | 0           | 190083.071   | 0.002                      | 282.4263  |
| 34   | 4      | 30     | 33    | 5       | 29      | A    | 1           | 190094.583   | 0.003                      | 292.3814  |
| 32   | 7      | 26     | 31    | 7       | 25      | E    | 0           | 190099.628   | -0.022                     | 170.2865  |
| 32   | 7      | 26     | 31    | 7       | 25      | A    | 0           | 190104.921   | 0.066                      | 170.2745  |
| 34   | 5      | 30     | 33    | 5       | 29      | A    | 1           | 190108.988   | -0.072                     | 292.3814  |
| 34   | 4      | 30     | 33    | 4       | 29      | A    | 1           | 190120.507   | -0.052                     | 292.3806  |
| 32   | 7      | 26     | 31    | 7       | 25      | E    | 1           | 190132.265   | -0.111                     | 286.5806  |
| 34   | 5      | 30     | 33    | 4       | 29      | A    | 1           | 190135.006   | -0.034                     | 292.3806  |
| 35   | 3      | 32     | 34    | 3       | 31      | A    | 1           | 190165.655   | -0.217                     | 294.3426  |
| 35   | 4      | 32     | 34    | 3       | 31      | A    | 1           | 190165.655   | -0.217                     | 294.3426  |
| 35   | 4      | 32     | 34    | 4       | 31      | A    | 1           | 190165.655   | -0.217                     | 294.3426  |
| 33   | 6      | 28     | 32    | 6       | 27      | A    | 1           | 190181.634   | -0.044                     | 289.9275  |
| 32   | 18     | 15     | 32    | 17      | 15      | E    | 1           | 190206.227   | -0.998                     | 339.5960  |
| 32   | 14     | 18     | 31    | 14      | 17      | E    | 1           | 190212.853   | 0.020                      | 314.9903  |
| 32   | 14     | 19     | 31    | 14      | 18      | E    | 1           | 190260.812   | 0.044                      | 314.3628  |
| 34   | 4      | 30     | 33    | 5       | 29      | E    | 0           | 190273.136   | -0.117                     | 175.6804  |
| 34   | 5      | 30     | 33    | 5       | 29      | E    | 1           | 190279.182   | -0.142                     | 291.9790  |
| 34   | 5      | 30     | 33    | 5       | 29      | E    | 0           | 190289.348   | -0.070                     | 175.6804  |
| 34   | 4      | 30     | 33    | 4       | 29      | E    | 1           | 190292.516   | -0.154                     | 291.9780  |
| 34   | 5      | 30     | 33    | 5       | 29      | A    | 0           | 190294.590   | -0.064                     | 175.6678  |
| 35   | 4      | 32     | 34    | 4       | 31      | E    | 1           | 190297.332   | -0.041                     | 293.9206  |
| 35   | 3      | 32     | 34    | 3       | 31      | E    | 1           | 190297.332   | -0.041                     | 293.9206  |
| 34   | 4      | 30     | 33    | 4       | 29      | E    | 0           | 190302.008   | -0.113                     | 175.6794  |
| 32   | 14     | 19     | 31    | 14      | 18      | A    | 1           | 190306.902   | 0.397                      | 314.6568  |
| 32   | 14     | 18     | 31    | 14      | 17      | A    | 1           | 190306.902   | 0.397                      | 314.6568  |
| 34   | 5      | 30     | 33    | 4       | 29      | E    | 1           | 190309.480   | -0.319                     | 291.9780  |
| 36   | 2      | 34     | 35    | 2       | 33      | A    | 1           | 190314.472   | -0.053                     | 295.8513  |
| 36   | 3      | 34     | 35    | 2       | 33      | A    | 1           | 190314.472   | -0.053                     | 295.8513  |
| 36   | 2      | 34     | 35    | 3       | 33      | A    | 1           | 190314.472   | -0.053                     | 295.8513  |
| 36   | 3      | 34     | 35    | 3       | 33      | A    | 1           | 190314.472   | -0.053                     | 295.8513  |
| 35   | 3      | 32     | 34    | 3       | 31      | E    | 0           | 190318.134   | -0.027                     | 177.6254  |
| 35   | 4      | 32     | 34    | 4       | 31      | E    | 0           | 190318.134   | -0.027                     | 177.6255  |
| 34   | 5      | 30     | 33    | 4       | 29      | E    | 0           | 190318.134   | -0.027                     | 175.6794  |
| 35   | 3      | 32     | 34    | 3       | 31      | A    | 0           | 190322.178   | 0.032                      | 177.6122  |
| 35   | 4      | 32     | 34    | 4       | 31      | A    | 0           | 190322.178   | 0.032                      | 177.6122  |
| 46   | 4      | 42     | 46    | 3       | 43      | E    | 0           | 190334.094   | 0.057                      | 264.7046  |
| 46   | 5      | 42     | 46    | 3       | 43      | E    | 0           | 190334.094   | 0.057                      | 264.7046  |
| 46   | 5      | 42     | 46    | 4       | 43      | E    | 0           | 190334.094   | 0.057                      | 264.7046  |
| 46   | 4      | 42     | 46    | 3       | 43      | A    | 0           | 190369.993   | 0.037                      | 264.6929  |
| 46   | 5      | 42     | 46    | 3       | 43      | A    | 0           | 190369.993   | 0.037                      | 264.6929  |
| 46   | 5      | 42     | 46    | 4       | 43      | A    | 0           | 190369.993   | 0.037                      | 264.6929  |
| 32   | 14     | 18     | 31    | 14      | 17      | A    | 0           | 190381.390   | 0.008                      | 198.2251  |
| 32   | 14     | 19     | 31    | 14      | 18      | A    | 0           | 190381.390   | 0.008                      | 198.2251  |
| 32   | 14     | 18     | 31    | 14      | 17      | E    | 0           | 190382.919   | 0.110                      | 198.2344  |
| 32   | 14     | 19     | 31    | 14      | 18      | E    | 0           | 190384.402   | 0.115                      | 198.2147  |
| 33   | 6      | 28     | 32    | 6       | 27      | E    | 0           | 190387.440   | -0.140                     | 173.2366  |
| 33   | 6      | 28     | 32    | 6       | 27      | E    | 1           | 190389.871   | -0.076                     | 289.5353  |
| 33   | 6      | 28     | 32    | 6       | 27      | A    | 0           | 190393.822   | -0.029                     | 173.2243  |
| 36   | 3      | 34     | 35    | 3       | 33      | E    | 1           | 190409.226   | 0.014                      | 295.4007  |
| 36   | 2      | 34     | 35    | 3       | 33      | E    | 1           | 190409.226   | 0.014                      | 295.4007  |
| 36   | 3      | 34     | 35    | 2       | 33      | E    | 1           | 190409.226   | 0.014                      | 295.4007  |
| 36   | 2      | 34     | 35    | 2       | 33      | E    | 1           | 190409.226   | 0.014                      | 295.4007  |
| 33   | 5      | 28     | 32    | 5       | 27      | A    | 1           | 190415.654   | -0.020                     | 289.9082  |
| 36   | 2      | 34     | 35    | 2       | 33      | E    | 0           | 190439.315   | -0.099                     | 179.1120  |
| 36   | 3      | 34     | 35    | 2       | 33      | E    | 0           | 190439.315   | -0.099                     | 179.1120  |
| 36   | 2      | 34     | 35    | 3       | 33      | E    | 0           | 190439.315   | -0.099                     | 179.1120  |
| 36   | 3      | 34     | 35    | 3       | 33      | E    | 0           | 190439.315   | -0.099                     | 179.1120  |
| 36   | 2      | 34     | 35    | 2       | 33      | A    | 0           | 190442.231   | -0.087                     | 179.0979  |
| 36   | 3      | 34     | 35    | 2       | 33      | A    | 0           | 190442.231   | -0.087                     | 179.0979  |
| 36   | 2      | 34     | 35    | 3       | 33      | A    | 0           | 190442.231   | -0.087                     | 179.0979  |
| 36   | 3      | 34     | 35    | 3       | 33      | A    | 0           | 190442.231   | -0.087                     | 179.0979  |
| 35   | 9      | 27     | 34    | 9       | 25      | E    | 1           | 190459.770   | 0.370                      | 313.4461  |
| 37   | 1      | 36     | 36    | 1       | 35      | A    | 1           | 190508.177   | -0.040                     | 296.9346  |
| 37   | 2      | 36     | 36    | 1       | 35      | A    | 1           | 190508.177   | -0.040                     | 296.9346  |
| 37   | 1      | 36     | 36    | 2       | 35      | A    | 1           | 190508.177   | -0.040                     | 296.9346  |
| 37   | 2      | 36     | 36    | 2       | 35      | A    | 1           | 190508.177   | -0.040                     | 296.9346  |
| 37   | 2      | 36     | 36    | 2       | 35      | E    | 1           | 190564.777   | -0.224                     | 296.4468  |
| 37   | 1      | 36     | 36    | 2       | 35      | E    | 1           | 190564.777   | -0.224                     | 296.4468  |
| 37   | 2      | 36     | 36    | 1       | 35      | E    | 1           | 190564.777   | -0.224                     | 296.4468  |
| 37   | 1      | 36     | 36    | 1       | 35      | E    | 1           | 190564.777   | -0.224                     | 296.4468  |
| 13   | 10     | 3      | 12    | 9       | 3       | E    | 1           | 190568.338   | 0.158                      | 209.6648  |
| 37   | 1      | 36     | 36    | 1       | 35      | E    | 0           | 190604.510   | -0.123                     | 180.1672  |
| 37   | 2      | 36     | 36    | 2       | 35      | E    | 0           | 190604.510   | -0.123                     | 180.1672  |
| 37   | 1      | 36     | 36    | 1       | 35      | A    | 0           | 190606.334   | -0.034                     | 180.1520  |
| 37   | 2      | 36     | 36    | 1       | 35      | A    | 0           | 190606.334   | -0.034                     | 180.1520  |
| 37   | 1      | 36     | 36    | 2       | 35      | A    | 0           | 190606.334   | -0.034                     | 180.1520  |
| 37   | 2      | 36     | 36    | 2       | 35      | A    | 0           | 190606.334   | -0.034                     | 180.1520  |
| 41   | 17     | 24     | 41    | 16      | 25      | E    | 0           | 190626.195   | -0.023                     | 282.4263  |
| 33   | 5      | 28     | 32    | 5       | 27      | E    | 0           | 190641.129   | -0.080                     | 173.2154  |
| 33   | 5      | 28     | 32    | 5       | 27      | A    | 0           | 190648.580   | -0.094                     | 173.2030  |
| 33   | 5      | 28     | 32    | 5       | 27      | E    | 1           | 190652.778   | -0.099                     | 289.5132  |
| 32   | 13     | 19     | 31    | 13      | 18      | E    | 1           | 190678.846   | 0.058                      | 309.7158  |
| 38   | 0      | 38     | 37    | 0       | 37      | A    | 1           | 190722.158   | -0.029                     | 297.6106  |
| 38   | 1      | 38     | 37    | 0       | 37      | A    | 1           | 190722.158   | -0.029                     | 297.6106  |
| 38   | 0      | 38     | 37    | 1       | 37      | A    | 1           | 190722.158   | -0.029                     | 297.6106  |
| 38   | 1      | 38     | 37    | 1       | 37      | A    | 1           | 190722.158   | -0.029                     | 297.6106  |
| 33   | 9      | 25     | 33    | 7       | 27      | E    | 1           | 190732.095   | 0.707                      | 299.4358  |
| 38   | 1      | 38     | 37    | 1       | 37      | E    | 1           | 190738.115   | -0.091                     | 297.0767  |
| 38   | 0      | 38     | 37    | 1       | 37      | E    | 1           | 190738.115   | -0.091                     | 297.0767  |
| 38   | 1      | 38     | 37    | 0       | 37      | E    | 1           | 190738.115   | -0.091                     | 297.0767  |
| 38   | 0      | 38     | 37    | 0       | 37      | E    | 1           | 190738.115   | -0.091                     | 297.0767  |
| 32   | 13     | 20     | 31    | 13      | 19      | E    | 1           | 190748.935   | 0.081                      | 309.0938  |
| 38   | 0      | 38     | 37    | 0       | 37      | A    | 0           | 190788.207   | -0.246                     | 180.7922  |

| $J'$ | $K'_a$ | $K'_c$ | $J''$ | $K''_a$ | $K''_c$ | Sym. | $v_{tCH_3}$ | $\nu_{Obs.}$ | $\nu_{Obs.} - \nu_{Calc.}$ | $E_{low}$ |
|------|--------|--------|-------|---------|---------|------|-------------|--------------|----------------------------|-----------|
| 38   | 1      | 38     | 37    | 0       | 37      | A    | 0           | 190788.207   | -0.246                     | 180.7922  |
| 38   | 0      | 38     | 37    | 1       | 37      | A    | 0           | 190788.207   | -0.246                     | 180.7922  |
| 38   | 1      | 38     | 37    | 1       | 37      | A    | 0           | 190788.207   | -0.246                     | 180.7922  |
| 38   | 0      | 38     | 37    | 0       | 37      | E    | 0           | 190788.207   | 0.241                      | 180.8089  |
| 38   | 1      | 38     | 37    | 0       | 37      | E    | 0           | 190788.207   | 0.241                      | 180.8089  |
| 38   | 0      | 38     | 37    | 1       | 37      | E    | 0           | 190788.207   | 0.241                      | 180.8089  |
| 38   | 1      | 38     | 37    | 1       | 37      | E    | 0           | 190788.207   | 0.241                      | 180.8089  |
| 32   | 13     | 20     | 31    | 13      | 19      | A    | 1           | 190796.076   | 0.127                      | 309.4526  |
| 32   | 13     | 19     | 31    | 13      | 18      | A    | 1           | 190796.076   | 0.127                      | 309.4526  |
| 41   | 2      | 40     | 41    | 1       | 41      | E    | 1           | 190804.687   | -0.327                     | 323.5177  |
| 41   | 1      | 40     | 41    | 1       | 41      | E    | 1           | 190804.687   | -0.327                     | 323.5177  |
| 41   | 1      | 40     | 41    | 0       | 41      | E    | 1           | 190804.687   | -0.327                     | 323.5177  |
| 30   | 20     | 10     | 29    | 20      | 10      | E    | 1           | 190813.952   | 0.024                      | 342.7330  |
| 32   | 13     | 19     | 31    | 13      | 18      | A    | 0           | 190864.667   | -0.011                     | 192.9774  |
| 32   | 13     | 20     | 31    | 13      | 19      | A    | 0           | 190864.667   | -0.011                     | 192.9774  |
| 20   | 7      | 13     | 19    | 6       | 13      | E    | 0           | 190866.295   | 0.202                      | 106.5847  |
| 32   | 13     | 19     | 31    | 13      | 18      | E    | 0           | 190866.295   | 0.202                      | 192.9887  |
| 32   | 13     | 20     | 31    | 13      | 19      | E    | 0           | 190868.442   | 0.119                      | 192.9692  |
| 34   | 7      | 27     | 33    | 8       | 26      | A    | 0           | 190941.920   | -0.283                     | 186.3835  |
| 34   | 7      | 27     | 33    | 8       | 26      | E    | 0           | 190986.742   | -0.291                     | 186.3946  |
| 33   | 6      | 28     | 32    | 5       | 27      | E    | 0           | 191020.558   | -0.322                     | 173.2154  |
| 33   | 6      | 28     | 32    | 5       | 27      | A    | 0           | 191030.281   | -0.113                     | 173.2030  |
| 33   | 6      | 28     | 32    | 5       | 27      | E    | 1           | 191050.453   | -0.106                     | 289.5132  |
| 48   | 5      | 43     | 48    | 4       | 44      | E    | 0           | 191278.551   | 0.322                      | 288.2009  |
| 48   | 6      | 43     | 48    | 4       | 44      | E    | 0           | 191278.551   | 0.322                      | 288.2009  |
| 48   | 6      | 43     | 48    | 5       | 44      | E    | 0           | 191278.551   | 0.322                      | 288.2009  |
| 32   | 12     | 20     | 31    | 12      | 19      | E    | 1           | 191285.198   | 0.063                      | 304.8655  |
| 48   | 5      | 43     | 48    | 4       | 44      | A    | 0           | 191310.031   | 0.212                      | 288.1908  |
| 48   | 6      | 43     | 48    | 4       | 44      | A    | 0           | 191310.031   | 0.212                      | 288.1908  |
| 48   | 5      | 43     | 48    | 5       | 44      | A    | 0           | 191310.031   | 0.212                      | 288.1908  |
| 48   | 6      | 43     | 48    | 5       | 44      | A    | 0           | 191310.031   | 0.212                      | 288.1908  |
| 48   | 12     | 36     | 47    | 13      | 34      | E    | 1           | 191343.409   | 0.461                      | 436.8571  |
| 32   | 12     | 21     | 31    | 12      | 20      | E    | 1           | 191387.414   | 0.028                      | 304.2597  |
| 48   | 6      | 43     | 48    | 5       | 44      | E    | 1           | 191393.144   | -0.054                     | 404.4870  |
| 48   | 5      | 43     | 48    | 5       | 44      | E    | 1           | 191393.144   | -0.054                     | 404.4870  |
| 48   | 6      | 43     | 48    | 4       | 44      | E    | 1           | 191393.144   | -0.054                     | 404.4870  |
| 48   | 5      | 43     | 48    | 4       | 44      | E    | 1           | 191393.144   | -0.054                     | 404.4870  |
| 31   | 10     | 22     | 31    | 8       | 24      | E    | 1           | 191414.092   | 0.053                      | 289.5849  |
| 32   | 12     | 21     | 31    | 12      | 20      | A    | 1           | 191431.569   | 0.028                      | 304.6781  |
| 32   | 12     | 20     | 31    | 12      | 19      | A    | 1           | 191437.533   | -0.037                     | 304.6783  |
| 32   | 12     | 21     | 31    | 12      | 20      | A    | 0           | 191492.648   | 0.067                      | 188.1591  |
| 32   | 12     | 20     | 31    | 12      | 19      | E    | 0           | 191496.807   | -0.027                     | 188.1724  |
| 32   | 12     | 20     | 31    | 12      | 19      | A    | 0           | 191498.239   | 0.100                      | 188.1593  |
| 32   | 12     | 21     | 31    | 12      | 20      | E    | 0           | 191500.093   | 0.103                      | 188.1534  |
| 33   | 6      | 27     | 32    | 7       | 26      | E    | 1           | 191729.627   | 0.241                      | 292.9228  |
| 33   | 6      | 27     | 32    | 7       | 26      | A    | 0           | 191822.582   | 0.065                      | 176.6157  |
| 33   | 6      | 27     | 32    | 7       | 26      | E    | 0           | 191831.995   | 0.024                      | 176.6276  |
| 33   | 6      | 27     | 32    | 7       | 26      | A    | 1           | 191872.717   | -0.468                     | 293.3048  |
| 15   | 4      | 12     | 14    | 2       | 13      | E    | 1           | 191893.808   | 0.198                      | 198.4182  |
| 50   | 7      | 44     | 50    | 6       | 45      | E    | 1           | 191932.277   | -0.006                     | 429.0007  |
| 50   | 6      | 44     | 50    | 6       | 45      | E    | 1           | 191932.277   | -0.006                     | 429.0007  |
| 50   | 7      | 44     | 50    | 5       | 45      | E    | 1           | 191932.277   | -0.006                     | 429.0007  |
| 50   | 6      | 44     | 50    | 5       | 45      | E    | 1           | 191932.277   | -0.006                     | 429.0007  |
| 32   | 11     | 21     | 31    | 11      | 20      | E    | 1           | 192108.576   | 0.049                      | 300.4535  |
| 32   | 11     | 22     | 31    | 11      | 21      | E    | 1           | 192261.519   | 0.191                      | 299.8758  |
| 32   | 11     | 22     | 31    | 11      | 21      | A    | 1           | 192271.047   | 0.019                      | 300.3469  |
| 32   | 11     | 22     | 31    | 11      | 21      | A    | 0           | 192322.947   | -0.087                     | 183.7843  |
| 32   | 6      | 26     | 31    | 6       | 25      | A    | 1           | 192326.579   | -0.045                     | 286.7277  |
| 32   | 11     | 21     | 31    | 11      | 20      | A    | 1           | 192341.598   | 0.041                      | 300.3494  |
| 32   | 11     | 22     | 31    | 11      | 21      | E    | 0           | 192355.978   | 0.082                      | 183.7821  |
| 32   | 11     | 21     | 31    | 11      | 20      | E    | 0           | 192363.256   | 0.064                      | 183.8004  |
| 32   | 11     | 21     | 31    | 11      | 20      | A    | 0           | 192388.617   | 0.112                      | 183.7866  |
| 21   | 7      | 15     | 20    | 6       | 14      | A    | 1           | 192445.745   | 0.063                      | 227.4360  |
| 43   | 3      | 41     | 43    | 2       | 42      | E    | 1           | 192594.114   | -0.382                     | 344.4133  |
| 43   | 2      | 41     | 43    | 2       | 42      | E    | 1           | 192594.114   | -0.382                     | 344.4133  |
| 43   | 3      | 41     | 43    | 1       | 42      | E    | 1           | 192594.114   | -0.382                     | 344.4133  |
| 43   | 2      | 41     | 43    | 1       | 42      | E    | 1           | 192594.114   | -0.382                     | 344.4133  |
| 32   | 6      | 26     | 31    | 6       | 25      | E    | 0           | 192657.380   | -0.002                     | 170.0274  |
| 32   | 6      | 26     | 31    | 6       | 25      | A    | 0           | 192670.525   | 0.001                      | 170.0144  |
| 32   | 6      | 26     | 31    | 6       | 25      | E    | 1           | 192717.607   | -0.214                     | 286.3154  |
| 32   | 8      | 25     | 31    | 8       | 24      | A    | 1           | 193091.584   | 0.006                      | 289.9803  |
| 32   | 8      | 25     | 31    | 8       | 24      | E    | 0           | 193234.671   | 0.014                      | 173.3156  |
| 32   | 8      | 25     | 31    | 8       | 24      | A    | 0           | 193235.861   | 0.066                      | 173.3044  |
| 32   | 10     | 23     | 31    | 10      | 22      | A    | 1           | 193288.206   | -0.020                     | 296.4759  |
| 32   | 10     | 22     | 31    | 10      | 21      | E    | 1           | 193324.890   | 0.045                      | 296.5054  |
| 18   | 8      | 11     | 17    | 7       | 10      | A    | 1           | 193332.352   | 0.174                      | 218.2682  |
| 32   | 10     | 23     | 31    | 10      | 22      | A    | 0           | 193337.173   | 0.098                      | 179.8705  |
| 32   | 10     | 23     | 31    | 10      | 22      | E    | 0           | 193373.896   | 0.053                      | 179.8758  |
| 21   | 7      | 15     | 20    | 6       | 14      | E    | 0           | 193501.848   | -0.313                     | 110.6796  |
| 32   | 10     | 23     | 31    | 10      | 22      | E    | 1           | 193541.081   | 0.198                      | 295.9697  |
| 32   | 8      | 25     | 31    | 8       | 24      | E    | 1           | 193541.981   | 0.042                      | 289.5849  |
| 44   | 10     | 35     | 43    | 10      | 33      | E    | 1           | 193583.034   | 0.064                      | 389.5365  |
| 31   | 8      | 23     | 30    | 8       | 22      | E    | 1           | 193698.494   | 0.197                      | 284.0078  |
| 34   | 17     | 17     | 34    | 16      | 18      | A    | 0           | 193799.968   | -0.313                     | 229.5656  |
| 34   | 17     | 18     | 34    | 16      | 19      | A    | 0           | 193799.968   | -0.313                     | 229.5656  |
| 45   | 3      | 42     | 45    | 2       | 43      | E    | 0           | 193872.482   | -0.189                     | 250.0726  |
| 45   | 4      | 42     | 45    | 2       | 43      | E    | 0           | 193872.482   | -0.189                     | 250.0726  |
| 45   | 4      | 42     | 45    | 3       | 43      | E    | 0           | 193872.482   | -0.189                     | 250.0726  |
| 32   | 10     | 22     | 31    | 10      | 21      | E    | 0           | 193882.079   | 0.097                      | 179.9056  |
| 32   | 10     | 22     | 31    | 10      | 21      | A    | 1           | 193897.459   | -0.166                     | 296.5021  |
| 32   | 10     | 22     | 31    | 10      | 21      | A    | 0           | 193908.843   | 0.114                      | 179.8949  |
| 33   | 29     | 4      | 32    | 29      | 3       | E    | 1           | 193928.764   | -0.209                     | 448.7724  |
| 33   | 29     | 5      | 32    | 29      | 4       | A    | 1           | 193933.589   | -0.189                     | 448.1647  |
| 33   | 29     | 4      | 32    | 29      | 3       | A    | 1           | 193933.589   | -0.189                     | 448.1647  |
| 33   | 29     | 5      | 32    | 29      | 4       | E    | 1           | 193939.886   | -0.194                     | 448.6229  |
| 16   | 9      | 8      | 15    | 8       | 7       | A    | 1           | 193970.483   | 0.409                      | 214.6169  |
| 16   | 9      | 7      | 15    | 8       | 8       | A    | 1           | 193970.483   | 0.409                      | 214.6169  |
| 32   | 9      | 24     | 31    | 9       | 23      | A    | 1           | 193975.272   | 0.023                      | 293.0585  |
| 33   | 28     | 5      | 32    | 28      | 4       | A    | 1           | 193992.692   | -0.162                     | 436.8511  |
| 33   | 28     | 6      | 32    | 28      | 5       | A    | 1           | 193992.692   | -0.162                     | 436.8511  |
| 33   | 30     | 3      | 32    | 30      | 2       | A    | 0           | 193995.811   | -0.415                     | 343.7298  |
| 33   | 30     | 4      | 32    | 30      | 3       | A    | 0           | 193995.811   | -0.415                     | 343.7298  |
| 33   | 28     | 6      | 32    | 28      | 5       | E    | 1           | 193997.620   | -0.052                     | 437.3573  |
| 33   | 27     | 7      | 32    | 27      | 5       | E    | 1           | 194037.600   | -0.672                     | 426.4889  |
| 33   | 29     | 4      | 32    | 29      | 3       | A    | 0           | 194049.154   | -0.256                     | 332.0312  |
| 33   | 29     | 5      | 32    | 29      | 4       | A    | 0           | 194049.154   | -0.256                     | 332.0312  |
| 33   | 29     | 5      | 32    | 29      | 4       | E    | 0           | 194049.154   | -0.388                     | 332.0120  |
| 32   | 9      | 24     | 31    | 9       | 23      | A    | 0           | 194051.497   | 0.129                      | 176.4137  |
| 33   | 27     | 6      | 32    | 27      | 5       | A    | 1           | 194057.474   | -0.267                     | 425.9407  |
| 33   | 27     | 7      | 32    | 27      | 6       | A    | 1           | 194057.474   | -0.267                     | 425.9407  |
| 32   | 9      | 24     | 31    | 9       | 23      | E    | 0           | 194057.474   | 0.069                      | 176.4232  |
| 33   | 27     | 7      | 32    | 27      | 6       | E    | 1           | 194060.726   | 0.092                      | 426.4881  |
| 33   | 28     | 5      | 32    | 28      | 4       | A    | 0           | 194107.196   | -0.251                     | 320.7302  |
| 33   | 28     | 6      | 32    | 28      | 5       | A    | 0           | 194107.196   | -0.251                     | 320.7302  |
| 33   | 26     | 8      | 32    | 26      | 7       | A    | 1           | 194129.550   | 0.176                      | 415.4337  |
| 33   | 26     | 7      | 32    | 26      | 6       | A    | 1           | 194129.550   | 0.176                      | 415.4337  |

| $J'$ | $K'_a$ | $K'_c$ | $J''$ | $K''_a$ | $K''_c$ | Sym. | $v_{tCH_3}$ | $\nu_{Obs.}$ | $\nu_{Obs.} - \nu_{Calc.}$ | $E_{low}$ |
|------|--------|--------|-------|---------|---------|------|-------------|--------------|----------------------------|-----------|
| 33   | 26     | 7      | 32    | 26      | 6       | E    | 1           | 194129.550   | -0.310                     | 416.0150  |
| 33   | 27     | 6      | 32    | 27      | 5       | A    | 0           | 194171.043   | -0.068                     | 309.8272  |
| 33   | 27     | 7      | 32    | 27      | 6       | A    | 0           | 194171.043   | -0.068                     | 309.8272  |
| 33   | 27     | 7      | 32    | 27      | 6       | E    | 0           | 194171.043   | -0.371                     | 309.8099  |
| 33   | 25     | 9      | 32    | 25      | 8       | E    | 1           | 194192.852   | -0.141                     | 405.7896  |
| 33   | 25     | 8      | 32    | 25      | 7       | E    | 1           | 194206.383   | -0.047                     | 405.9378  |
| 33   | 25     | 9      | 32    | 25      | 8       | A    | 1           | 194208.971   | 0.092                      | 405.3306  |
| 33   | 25     | 8      | 32    | 25      | 7       | A    | 1           | 194208.971   | 0.092                      | 405.3306  |
| 33   | 26     | 7      | 32    | 26      | 6       | A    | 0           | 194241.219   | -0.114                     | 299.3224  |
| 33   | 26     | 8      | 32    | 26      | 7       | A    | 0           | 194241.219   | -0.114                     | 299.3224  |
| 33   | 26     | 8      | 32    | 26      | 7       | E    | 0           | 194241.219   | -0.085                     | 299.3041  |
| 33   | 24     | 9      | 32    | 24      | 8       | E    | 1           | 194291.805   | 0.138                      | 396.2564  |
| 33   | 24     | 10     | 32    | 24      | 9       | A    | 1           | 194297.644   | 0.012                      | 395.6316  |
| 33   | 24     | 9      | 32    | 24      | 8       | A    | 1           | 194297.644   | 0.012                      | 395.6316  |
| 33   | 25     | 8      | 32    | 25      | 7       | A    | 0           | 194319.203   | -0.034                     | 289.2162  |
| 33   | 25     | 9      | 32    | 25      | 8       | A    | 0           | 194319.203   | -0.034                     | 289.2162  |
| 33   | 25     | 9      | 32    | 25      | 8       | E    | 0           | 194319.203   | -0.096                     | 289.1971  |
| 18   | 8      | 11     | 17    | 7       | 11      | E    | 0           | 194371.117   | -0.151                     | 101.5335  |
| 33   | 23     | 11     | 32    | 23      | 10      | E    | 1           | 194375.212   | 0.039                      | 386.6819  |
| 32   | 17     | 15     | 32    | 16      | 16      | A    | 0           | 194385.464   | -0.342                     | 216.3029  |
| 32   | 17     | 16     | 32    | 16      | 17      | A    | 0           | 194385.464   | -0.342                     | 216.3029  |
| 33   | 23     | 10     | 32    | 23      | 9       | E    | 1           | 194387.399   | 0.201                      | 386.9709  |
| 18   | 8      | 11     | 17    | 7       | 10      | A    | 0           | 194390.816   | -0.110                     | 101.5300  |
| 33   | 23     | 10     | 32    | 23      | 9       | A    | 1           | 194397.374   | 0.053                      | 386.3371  |
| 33   | 23     | 11     | 32    | 23      | 10      | A    | 1           | 194397.374   | 0.053                      | 386.3371  |
| 33   | 24     | 9      | 32    | 24      | 8       | A    | 0           | 194406.287   | 0.096                      | 279.5089  |
| 33   | 24     | 10     | 32    | 24      | 9       | A    | 0           | 194406.287   | 0.096                      | 279.5089  |
| 33   | 24     | 10     | 32    | 24      | 9       | E    | 0           | 194406.287   | -0.075                     | 279.4893  |
| 18   | 8      | 10     | 17    | 7       | 10      | E    | 0           | 194411.171   | 0.043                      | 101.5480  |
| 18   | 8      | 10     | 17    | 7       | 11      | A    | 0           | 194484.571   | -0.384                     | 101.5273  |
| 33   | 22     | 12     | 32    | 22      | 11      | E    | 1           | 194484.571   | -0.076                     | 377.7277  |
| 33   | 22     | 11     | 32    | 22      | 10      | E    | 1           | 194495.098   | 0.056                      | 378.0814  |
| 33   | 23     | 10     | 32    | 23      | 9       | A    | 0           | 194504.014   | 0.138                      | 270.2011  |
| 33   | 23     | 11     | 32    | 23      | 10      | A    | 0           | 194504.014   | 0.138                      | 270.2011  |
| 33   | 23     | 11     | 32    | 23      | 10      | E    | 0           | 194504.014   | -0.163                     | 270.1812  |
| 33   | 22     | 11     | 32    | 22      | 10      | A    | 1           | 194510.178   | 0.133                      | 377.4474  |
| 33   | 22     | 12     | 32    | 22      | 11      | A    | 1           | 194510.178   | 0.133                      | 377.4474  |
| 20   | 7      | 13     | 19    | 6       | 14      | A    | 0           | 194536.484   | -0.312                     | 106.4482  |
| 31   | 8      | 23     | 30    | 8       | 22      | A    | 0           | 194544.547   | 0.099                      | 167.6460  |
| 31   | 8      | 23     | 30    | 8       | 22      | E    | 0           | 194552.701   | -0.024                     | 167.6587  |
| 16   | 9      | 8      | 15    | 8       | 7       | E    | 0           | 194552.701   | -0.024                     | 97.9284   |
| 31   | 8      | 23     | 30    | 8       | 22      | A    | 1           | 194567.575   | -0.120                     | 284.3488  |
| 33   | 21     | 13     | 32    | 21      | 12      | E    | 1           | 194609.760   | 0.020                      | 369.1748  |
| 33   | 22     | 11     | 32    | 22      | 10      | A    | 0           | 194614.705   | 0.323                      | 261.2933  |
| 33   | 22     | 12     | 32    | 22      | 11      | A    | 0           | 194614.705   | 0.323                      | 261.2933  |
| 33   | 22     | 12     | 32    | 22      | 11      | E    | 0           | 194614.705   | -0.130                     | 261.2734  |
| 33   | 21     | 12     | 32    | 21      | 11      | E    | 1           | 194618.011   | 0.275                      | 369.5882  |
| 33   | 21     | 13     | 32    | 21      | 12      | A    | 1           | 194638.571   | 0.132                      | 368.9629  |
| 33   | 21     | 12     | 32    | 21      | 11      | A    | 1           | 194638.571   | 0.132                      | 368.9629  |
| 31   | 7      | 24     | 30    | 7       | 23      | A    | 1           | 194670.914   | -0.096                     | 282.4811  |
| 33   | 21     | 12     | 32    | 21      | 11      | A    | 0           | 194740.711   | 0.382                      | 252.7862  |
| 33   | 21     | 13     | 32    | 21      | 12      | A    | 0           | 194740.711   | 0.382                      | 252.7862  |
| 33   | 21     | 13     | 32    | 21      | 12      | E    | 0           | 194740.711   | -0.247                     | 252.7666  |
| 31   | 7      | 24     | 30    | 7       | 23      | E    | 1           | 194747.297   | -0.161                     | 282.0497  |
| 33   | 20     | 13     | 32    | 20      | 12      | A    | 1           | 194785.951   | 0.102                      | 360.8844  |
| 33   | 20     | 14     | 32    | 20      | 13      | A    | 1           | 194785.951   | 0.102                      | 360.8844  |
| 20   | 6      | 14     | 19    | 5       | 15      | E    | 1           | 194801.115   | 0.609                      | 220.5942  |
| 33   | 20     | 13     | 32    | 20      | 12      | A    | 0           | 194885.272   | 0.226                      | 244.6808  |
| 33   | 20     | 14     | 32    | 20      | 13      | A    | 0           | 194885.272   | 0.226                      | 244.6808  |
| 31   | 7      | 24     | 30    | 7       | 23      | E    | 0           | 194894.941   | 0.017                      | 165.7654  |
| 31   | 7      | 24     | 30    | 7       | 23      | A    | 0           | 194900.529   | 0.011                      | 165.7514  |
| 34   | 5      | 29     | 33    | 6       | 28      | A    | 1           | 194911.003   | -0.016                     | 296.2713  |
| 22   | 7      | 16     | 21    | 6       | 15      | A    | 1           | 194941.332   | 0.012                      | 231.7696  |
| 33   | 19     | 15     | 32    | 19      | 14      | A    | 1           | 194956.697   | 0.103                      | 353.2123  |
| 33   | 19     | 14     | 32    | 19      | 13      | A    | 1           | 194956.697   | 0.103                      | 353.2123  |
| 32   | 9      | 24     | 31    | 9       | 23      | E    | 1           | 194977.421   | 0.122                      | 292.5851  |
| 33   | 7      | 27     | 32    | 7       | 26      | A    | 1           | 195025.112   | -0.016                     | 293.3048  |
| 16   | 9      | 8      | 15    | 8       | 8       | E    | 0           | 195030.869   | 0.098                      | 97.9124   |
| 35   | 5      | 31     | 34    | 5       | 30      | A    | 1           | 195045.263   | -0.109                     | 298.7228  |
| 35   | 4      | 31     | 34    | 4       | 30      | A    | 1           | 195052.092   | 0.249                      | 298.7223  |
| 33   | 19     | 14     | 32    | 19      | 13      | A    | 0           | 195052.113   | -0.709                     | 236.9780  |
| 33   | 19     | 15     | 32    | 19      | 14      | A    | 0           | 195052.113   | -0.709                     | 236.9780  |
| 33   | 19     | 15     | 32    | 19      | 14      | E    | 0           | 195054.028   | 0.131                      | 236.9598  |
| 35   | 5      | 31     | 34    | 4       | 30      | A    | 1           | 195059.885   | 0.033                      | 298.7223  |
| 16   | 9      | 7      | 15    | 8       | 7       | E    | 0           | 195069.880   | -0.059                     | 97.9284   |
| 34   | 5      | 29     | 33    | 6       | 28      | E    | 1           | 195086.498   | 0.005                      | 295.8860  |
| 34   | 5      | 29     | 33    | 6       | 28      | E    | 0           | 195098.055   | -0.156                     | 179.5872  |
| 25   | 17     | 9      | 25    | 16      | 9       | E    | 0           | 195098.055   | -0.156                     | 176.2437  |
| 16   | 9      | 8      | 15    | 8       | 7       | A    | 0           | 195101.031   | 0.028                      | 97.9100   |
| 16   | 9      | 7      | 15    | 8       | 8       | A    | 0           | 195101.031   | 0.028                      | 97.9100   |
| 34   | 5      | 29     | 33    | 6       | 28      | A    | 0           | 195103.204   | -0.062                     | 179.5751  |
| 33   | 18     | 15     | 32    | 18      | 14      | E    | 1           | 195112.020   | -0.095                     | 346.4944  |
| 36   | 3      | 33     | 35    | 3       | 32      | A    | 1           | 195113.841   | -0.135                     | 300.6859  |
| 36   | 4      | 33     | 35    | 3       | 32      | A    | 1           | 195113.841   | -0.135                     | 300.6859  |
| 36   | 3      | 33     | 35    | 4       | 32      | A    | 1           | 195113.841   | -0.135                     | 300.6859  |
| 36   | 4      | 33     | 35    | 4       | 32      | A    | 1           | 195113.841   | -0.135                     | 300.6859  |
| 34   | 6      | 29     | 33    | 6       | 28      | A    | 1           | 195115.242   | 0.095                      | 296.2713  |
| 33   | 18     | 16     | 32    | 18      | 15      | E    | 1           | 195117.782   | 0.080                      | 345.9406  |
| 33   | 18     | 15     | 32    | 18      | 14      | A    | 1           | 195156.452   | 0.121                      | 345.9479  |
| 33   | 18     | 16     | 32    | 18      | 15      | A    | 1           | 195156.452   | 0.121                      | 345.9479  |
| 47   | 4      | 43     | 47    | 3       | 44      | A    | 0           | 195197.212   | 0.242                      | 273.0233  |
| 47   | 5      | 43     | 47    | 3       | 44      | A    | 0           | 195197.212   | 0.242                      | 273.0233  |
| 47   | 5      | 43     | 47    | 4       | 44      | A    | 0           | 195197.212   | 0.242                      | 273.0233  |
| 35   | 4      | 31     | 34    | 5       | 30      | E    | 1           | 195204.503   | 0.021                      | 298.3261  |
| 35   | 5      | 31     | 34    | 5       | 30      | E    | 1           | 195213.961   | -0.075                     | 298.3261  |
| 35   | 4      | 31     | 34    | 4       | 30      | E    | 1           | 195221.599   | -0.011                     | 298.3255  |
| 35   | 5      | 31     | 34    | 5       | 30      | E    | 0           | 195226.328   | -0.016                     | 182.0278  |
| 35   | 5      | 31     | 34    | 5       | 30      | A    | 0           | 195231.473   | -0.062                     | 182.0153  |
| 35   | 4      | 31     | 34    | 4       | 30      | E    | 0           | 195233.388   | -0.138                     | 182.0272  |
| 33   | 7      | 27     | 32    | 7       | 26      | E    | 0           | 195234.764   | 0.113                      | 176.6276  |
| 35   | 4      | 31     | 34    | 4       | 30      | A    | 0           | 195238.759   | -0.001                     | 182.0148  |
| 33   | 7      | 27     | 32    | 7       | 26      | A    | 0           | 195240.576   | 0.052                      | 176.6157  |
| 35   | 5      | 31     | 34    | 4       | 30      | E    | 0           | 195242.418   | -0.091                     | 182.0272  |
| 36   | 4      | 33     | 35    | 4       | 32      | E    | 1           | 195244.769   | -0.003                     | 300.2683  |
| 36   | 3      | 33     | 35    | 3       | 32      | E    | 1           | 195244.769   | -0.003                     | 300.2683  |
| 35   | 5      | 31     | 34    | 4       | 30      | A    | 0           | 195247.668   | -0.136                     | 182.0148  |
| 33   | 18     | 15     | 32    | 18      | 14      | A    | 0           | 195249.315   | 0.041                      | 229.6795  |
| 33   | 18     | 16     | 32    | 18      | 15      | A    | 0           | 195249.315   | 0.041                      | 229.6795  |
| 33   | 18     | 15     | 32    | 18      | 14      | E    | 0           | 195250.668   | 0.100                      | 229.6797  |
| 33   | 18     | 16     | 32    | 18      | 15      | E    | 0           | 195250.668   | 0.100                      | 229.6624  |
| 33   | 7      | 27     | 32    | 7       | 26      | E    | 1           | 195254.277   | -0.128                     | 292.9228  |
| 34   | 5      | 29     | 33    | 5       | 28      | A    | 1           | 195257.269   | -0.057                     | 296.2598  |
| 37   | 2      | 35     | 36    | 2       | 34      | A    | 1           | 195267.465   | -0.252                     | 302.1995  |
| 37   | 3      | 35     | 36    | 2       | 34      | A    | 1           | 195267.465   | -0.252                     | 302.1995  |
| 37   | 2      | 35     | 36    | 3       | 34      | A    | 1           | 195267.465   | -0.252                     | 302.1995  |
| 37   | 3      | 35     | 36    | 3       | 34      | A    | 1           | 195267.465   | -0.252                     | 302.1995  |

| $J'$ | $K'_a$ | $K'_c$ | $J''$ | $K''_a$ | $K''_c$ | Sym. | $v_{tCH_3}$ | $\nu_{Obs.}$ | $\nu_{Obs.} - \nu_{Calc.}$ | $E_{low}$ |
|------|--------|--------|-------|---------|---------|------|-------------|--------------|----------------------------|-----------|
| 36   | 3      | 33     | 35    | 3       | 32      | E    | 0           | 195267.469   | 0.109                      | 183.9738  |
| 36   | 4      | 33     | 35    | 3       | 32      | E    | 0           | 195267.469   | 0.109                      | 183.9738  |
| 36   | 3      | 33     | 35    | 4       | 32      | E    | 0           | 195267.469   | 0.109                      | 183.9738  |
| 36   | 4      | 33     | 35    | 4       | 32      | E    | 0           | 195267.469   | 0.109                      | 183.9738  |
| 36   | 3      | 33     | 35    | 3       | 32      | A    | 0           | 195271.355   | -0.026                     | 183.9607  |
| 36   | 4      | 33     | 35    | 3       | 32      | A    | 0           | 195271.355   | -0.026                     | 183.9607  |
| 36   | 3      | 33     | 35    | 4       | 32      | A    | 0           | 195271.355   | -0.026                     | 183.9607  |
| 36   | 4      | 33     | 35    | 4       | 32      | A    | 0           | 195271.355   | -0.026                     | 183.9607  |
| 42   | 1      | 41     | 42    | 0       | 42      | A    | 0           | 195276.692   | 0.453                      | 214.2656  |
| 42   | 2      | 41     | 42    | 0       | 42      | A    | 0           | 195276.692   | 0.453                      | 214.2656  |
| 42   | 1      | 41     | 42    | 1       | 42      | A    | 0           | 195276.692   | 0.453                      | 214.2656  |
| 42   | 2      | 41     | 42    | 1       | 42      | A    | 0           | 195276.692   | 0.453                      | 214.2656  |
| 14   | 10     | 5      | 13    | 9       | 5       | E    | 0           | 195309.555   | 0.232                      | 95.5477   |
| 34   | 6      | 29     | 33    | 6       | 28      | E    | 0           | 195322.967   | -0.068                     | 179.5872  |
| 34   | 6      | 29     | 33    | 6       | 28      | E    | 1           | 195322.967   | 0.049                      | 295.8860  |
| 34   | 6      | 29     | 33    | 6       | 28      | A    | 0           | 195329.354   | 0.003                      | 179.5751  |
| 33   | 17     | 16     | 32    | 17      | 15      | E    | 1           | 195337.718   | 0.107                      | 339.5960  |
| 47   | 5      | 43     | 47    | 4       | 44      | E    | 1           | 195341.169   | 0.791                      | 389.3162  |
| 47   | 4      | 43     | 47    | 4       | 44      | E    | 1           | 195341.169   | 0.791                      | 389.3162  |
| 47   | 5      | 43     | 47    | 3       | 44      | E    | 1           | 195341.169   | 0.791                      | 389.3162  |
| 47   | 4      | 43     | 47    | 3       | 44      | E    | 1           | 195341.169   | 0.791                      | 389.3162  |
| 37   | 3      | 35     | 36    | 3       | 34      | E    | 1           | 195361.976   | -0.021                     | 301.7521  |
| 37   | 2      | 35     | 36    | 3       | 34      | E    | 1           | 195361.976   | -0.021                     | 301.7521  |
| 37   | 3      | 35     | 36    | 2       | 34      | E    | 1           | 195361.976   | -0.021                     | 301.7521  |
| 37   | 2      | 35     | 36    | 2       | 34      | E    | 1           | 195361.976   | -0.021                     | 301.7521  |
| 14   | 10     | 5      | 13    | 9       | 4       | A    | 0           | 195379.363   | 0.184                      | 95.5477   |
| 14   | 10     | 4      | 13    | 9       | 5       | A    | 0           | 195379.363   | 0.184                      | 95.5477   |
| 37   | 2      | 35     | 36    | 2       | 34      | E    | 0           | 195393.818   | -0.026                     | 185.4643  |
| 37   | 3      | 35     | 36    | 2       | 34      | E    | 0           | 195393.818   | -0.026                     | 185.4643  |
| 37   | 2      | 35     | 36    | 3       | 34      | E    | 0           | 195393.818   | -0.026                     | 185.4643  |
| 37   | 3      | 35     | 36    | 3       | 34      | E    | 0           | 195393.818   | -0.026                     | 185.4643  |
| 37   | 2      | 35     | 36    | 2       | 34      | A    | 0           | 195396.705   | -0.029                     | 185.4503  |
| 37   | 3      | 35     | 36    | 2       | 34      | A    | 0           | 195396.705   | -0.029                     | 185.4503  |
| 37   | 2      | 35     | 36    | 3       | 34      | A    | 0           | 195396.705   | -0.029                     | 185.4503  |
| 37   | 3      | 35     | 36    | 3       | 34      | A    | 0           | 195396.705   | -0.029                     | 185.4503  |
| 38   | 1      | 37     | 37    | 1       | 36      | A    | 1           | 195462.862   | -0.095                     | 303.2893  |
| 38   | 2      | 37     | 37    | 1       | 36      | A    | 1           | 195462.862   | -0.095                     | 303.2893  |
| 38   | 1      | 37     | 37    | 2       | 36      | A    | 1           | 195462.862   | -0.095                     | 303.2893  |
| 38   | 2      | 37     | 37    | 2       | 36      | A    | 1           | 195462.862   | -0.095                     | 303.2893  |
| 34   | 5      | 29     | 33    | 5       | 28      | E    | 0           | 195477.886   | 0.008                      | 179.5745  |
| 33   | 17     | 16     | 32    | 17      | 15      | A    | 0           | 195481.950   | 0.044                      | 222.7869  |
| 33   | 17     | 17     | 32    | 17      | 16      | A    | 0           | 195481.950   | 0.044                      | 222.7869  |
| 33   | 17     | 16     | 32    | 17      | 15      | E    | 0           | 195483.646   | 0.230                      | 222.7895  |
| 33   | 17     | 17     | 32    | 17      | 16      | E    | 0           | 195483.646   | 0.230                      | 222.7712  |
| 34   | 5      | 29     | 33    | 5       | 28      | A    | 0           | 195485.001   | 0.016                      | 179.5624  |
| 38   | 2      | 37     | 37    | 2       | 36      | E    | 1           | 195519.511   | -0.043                     | 302.8034  |
| 38   | 1      | 37     | 37    | 2       | 36      | E    | 1           | 195519.511   | -0.043                     | 302.8034  |
| 38   | 2      | 37     | 37    | 1       | 36      | E    | 1           | 195519.511   | -0.043                     | 302.8034  |
| 38   | 1      | 37     | 37    | 1       | 36      | E    | 1           | 195519.511   | -0.043                     | 302.8034  |
| 26   | 17     | 10     | 26    | 16      | 11      | E    | 0           | 195537.178   | -0.347                     | 181.3460  |
| 38   | 1      | 37     | 37    | 1       | 36      | E    | 0           | 195560.663   | -0.043                     | 186.5251  |
| 38   | 2      | 37     | 37    | 1       | 36      | E    | 0           | 195560.663   | -0.043                     | 186.5251  |
| 38   | 1      | 37     | 37    | 2       | 36      | E    | 0           | 195560.663   | -0.043                     | 186.5251  |
| 38   | 2      | 37     | 37    | 2       | 36      | E    | 0           | 195560.663   | -0.043                     | 186.5251  |
| 38   | 1      | 37     | 37    | 1       | 36      | A    | 0           | 195562.471   | 0.036                      | 186.5099  |
| 38   | 2      | 37     | 37    | 1       | 36      | A    | 0           | 195562.471   | 0.036                      | 186.5099  |
| 38   | 1      | 37     | 37    | 2       | 36      | A    | 0           | 195562.471   | 0.036                      | 186.5099  |
| 38   | 2      | 37     | 37    | 2       | 36      | A    | 0           | 195562.471   | 0.036                      | 186.5099  |
| 33   | 16     | 17     | 32    | 16      | 16      | E    | 1           | 195607.948   | 0.116                      | 333.1008  |
| 33   | 16     | 18     | 32    | 16      | 17      | E    | 1           | 195630.998   | 0.022                      | 332.4926  |
| 33   | 16     | 17     | 32    | 16      | 16      | A    | 1           | 195675.798   | -0.002                     | 332.6479  |
| 33   | 16     | 18     | 32    | 16      | 17      | A    | 1           | 195675.798   | -0.002                     | 332.6479  |
| 39   | 0      | 39     | 38    | 0       | 38      | A    | 1           | 195677.382   | 0.018                      | 303.9724  |
| 39   | 1      | 39     | 38    | 0       | 38      | A    | 1           | 195677.382   | 0.018                      | 303.9724  |
| 39   | 0      | 39     | 38    | 1       | 38      | A    | 1           | 195677.382   | 0.018                      | 303.9724  |
| 39   | 1      | 39     | 38    | 1       | 38      | A    | 1           | 195677.382   | 0.018                      | 303.9724  |
| 39   | 1      | 39     | 38    | 1       | 38      | E    | 1           | 195693.217   | -0.033                     | 303.4390  |
| 39   | 0      | 39     | 38    | 1       | 38      | E    | 1           | 195693.217   | -0.033                     | 303.4390  |
| 39   | 1      | 39     | 38    | 0       | 38      | E    | 1           | 195693.217   | -0.033                     | 303.4390  |
| 39   | 0      | 39     | 38    | 0       | 38      | E    | 1           | 195693.217   | -0.033                     | 303.4390  |
| 34   | 6      | 29     | 33    | 5       | 28      | E    | 0           | 195702.707   | 0.000                      | 179.5745  |
| 34   | 6      | 29     | 33    | 5       | 28      | A    | 0           | 195710.667   | -0.406                     | 179.5624  |
| 34   | 6      | 29     | 33    | 5       | 28      | E    | 1           | 195720.682   | 0.081                      | 295.8727  |
| 39   | 0      | 39     | 38    | 0       | 38      | A    | 0           | 195744.672   | -0.274                     | 187.1563  |
| 39   | 1      | 39     | 38    | 0       | 38      | A    | 0           | 195744.672   | -0.274                     | 187.1563  |
| 39   | 0      | 39     | 38    | 1       | 38      | A    | 0           | 195744.672   | -0.274                     | 187.1563  |
| 39   | 1      | 39     | 38    | 1       | 38      | A    | 0           | 195744.672   | -0.274                     | 187.1563  |
| 39   | 0      | 39     | 38    | 0       | 38      | E    | 0           | 195744.672   | 0.209                      | 187.1729  |
| 39   | 1      | 39     | 38    | 0       | 38      | E    | 0           | 195744.672   | 0.209                      | 187.1729  |
| 39   | 0      | 39     | 38    | 1       | 38      | E    | 0           | 195744.672   | 0.209                      | 187.1729  |
| 39   | 1      | 39     | 38    | 1       | 38      | E    | 0           | 195744.672   | 0.209                      | 187.1729  |
| 33   | 16     | 17     | 32    | 16      | 16      | A    | 0           | 195760.990   | 0.024                      | 216.3029  |
| 33   | 16     | 18     | 32    | 16      | 17      | A    | 0           | 195760.990   | 0.024                      | 216.3029  |
| 33   | 16     | 17     | 32    | 16      | 16      | E    | 0           | 195762.891   | 0.167                      | 216.3079  |
| 33   | 16     | 18     | 32    | 16      | 17      | E    | 0           | 195762.891   | 0.167                      | 216.2888  |
| 32   | 9      | 23     | 31    | 9       | 22      | E    | 1           | 195905.418   | 0.084                      | 293.0867  |
| 33   | 15     | 18     | 32    | 15      | 17      | E    | 1           | 195936.521   | -0.072                     | 327.0123  |
| 33   | 15     | 19     | 32    | 15      | 18      | E    | 1           | 195972.908   | 0.016                      | 326.3904  |
| 33   | 15     | 19     | 32    | 15      | 18      | A    | 1           | 196020.554   | 0.116                      | 326.6172  |
| 33   | 15     | 18     | 32    | 15      | 17      | A    | 1           | 196020.554   | 0.116                      | 326.6172  |
| 31   | 7      | 25     | 30    | 6       | 24      | E    | 0           | 196098.399   | -0.449                     | 163.7454  |
| 33   | 15     | 18     | 32    | 15      | 17      | A    | 0           | 196100.886   | 0.005                      | 210.2309  |
| 33   | 15     | 19     | 32    | 15      | 18      | A    | 0           | 196100.886   | 0.005                      | 210.2309  |
| 33   | 15     | 18     | 32    | 15      | 17      | E    | 0           | 196102.627   | 0.252                      | 210.2381  |
| 33   | 15     | 19     | 32    | 15      | 18      | E    | 0           | 196103.584   | 0.110                      | 210.2185  |
| 31   | 7      | 25     | 30    | 6       | 24      | A    | 0           | 196141.897   | -0.057                     | 163.7319  |
| 49   | 5      | 44     | 49    | 4       | 45      | E    | 0           | 196141.897   | 0.333                      | 297.0223  |
| 49   | 6      | 44     | 49    | 4       | 45      | E    | 0           | 196141.897   | 0.333                      | 297.0223  |
| 49   | 6      | 44     | 49    | 5       | 45      | E    | 0           | 196141.897   | 0.333                      | 297.0223  |
| 49   | 5      | 44     | 49    | 4       | 45      | A    | 0           | 196174.480   | 0.455                      | 297.0123  |
| 49   | 6      | 44     | 49    | 4       | 45      | A    | 0           | 196174.480   | 0.455                      | 297.0123  |
| 49   | 5      | 44     | 49    | 5       | 45      | A    | 0           | 196174.480   | 0.455                      | 297.0123  |
| 49   | 6      | 44     | 49    | 5       | 45      | A    | 0           | 196174.480   | 0.455                      | 297.0123  |
| 33   | 14     | 19     | 32    | 14      | 18      | E    | 1           | 196343.990   | 0.005                      | 321.3351  |
| 33   | 14     | 20     | 32    | 14      | 19      | E    | 1           | 196398.039   | 0.005                      | 320.7092  |
| 33   | 14     | 20     | 32    | 14      | 19      | A    | 1           | 196447.932   | 0.104                      | 321.0047  |
| 33   | 14     | 19     | 32    | 14      | 18      | A    | 1           | 196447.932   | 0.104                      | 321.0047  |
| 33   | 14     | 19     | 32    | 14      | 18      | A    | 0           | 196522.753   | 0.048                      | 204.5755  |
| 33   | 14     | 20     | 32    | 14      | 19      | A    | 0           | 196522.753   | 0.048                      | 204.5755  |
| 33   | 14     | 19     | 32    | 14      | 18      | E    | 0           | 196524.410   | 0.153                      | 204.5849  |
| 33   | 14     | 20     | 32    | 14      | 19      | E    | 0           | 196526.067   | 0.141                      | 204.5652  |
| 39   | 9      | 30     | 38    | 10      | 29      | E    | 0           | 196618.368   | -0.139                     | 229.4560  |
| 33   | 6      | 27     | 32    | 6       | 26      | A    | 1           | 196724.563   | 0.030                      | 293.1430  |
| 33   | 13     | 20     | 32    | 13      | 19      | E    | 1           | 196860.715   | 0.051                      | 316.0762  |
| 33   | 13     | 21     | 32    | 13      | 20      | E    | 1           | 196939.602   | 0.124                      | 315.4565  |
| 33   | 13     | 21     | 32    | 13      | 20      | A    | 1           | 196990.269   | -0.021                     | 315.8168  |

| $J'$ | $K'_a$ | $K'_c$ | $J''$ | $K''_a$ | $K''_c$ | Sym. | $v_{tCH_3}$ | $\nu_{Obs.}$ | $\nu_{Obs.} - \nu_{Calc.}$ | $E_{low}$ |
|------|--------|--------|-------|---------|---------|------|-------------|--------------|----------------------------|-----------|
| 33   | 13     | 20     | 32    | 13      | 19      | A    | 1           | 196991.138   | -0.028                     | 315.8168  |
| 33   | 6      | 27     | 32    | 6       | 26      | E    | 0           | 197040.845   | -0.024                     | 176.4538  |
| 33   | 6      | 27     | 32    | 6       | 26      | A    | 0           | 197053.174   | 0.014                      | 176.4412  |
| 33   | 13     | 20     | 32    | 13      | 19      | A    | 0           | 197058.757   | -0.016                     | 199.3439  |
| 33   | 13     | 21     | 32    | 13      | 20      | A    | 0           | 197058.757   | -0.016                     | 199.3439  |
| 33   | 13     | 20     | 32    | 13      | 19      | E    | 0           | 197060.527   | 0.171                      | 199.3553  |
| 33   | 13     | 21     | 32    | 13      | 20      | E    | 0           | 197063.016   | 0.194                      | 199.3358  |
| 33   | 6      | 27     | 32    | 6       | 26      | E    | 1           | 197095.707   | -0.216                     | 292.7438  |
| 32   | 9      | 23     | 31    | 9       | 22      | A    | 0           | 197260.819   | 0.068                      | 176.5989  |
| 32   | 9      | 23     | 31    | 9       | 22      | E    | 0           | 197268.328   | 0.066                      | 176.6096  |
| 32   | 9      | 23     | 31    | 9       | 22      | A    | 1           | 197329.722   | -0.176                     | 293.2541  |
| 44   | 3      | 42     | 44    | 2       | 43      | E    | 1           | 197381.378   | -0.390                     | 351.9266  |
| 44   | 2      | 42     | 44    | 2       | 43      | E    | 1           | 197381.378   | -0.390                     | 351.9266  |
| 44   | 3      | 42     | 44    | 1       | 43      | E    | 1           | 197381.378   | -0.390                     | 351.9266  |
| 44   | 2      | 42     | 44    | 1       | 43      | E    | 1           | 197381.378   | -0.390                     | 351.9266  |
| 33   | 12     | 21     | 32    | 12      | 20      | E    | 1           | 197536.879   | 0.062                      | 311.2460  |
| 33   | 12     | 22     | 32    | 12      | 21      | E    | 1           | 197652.205   | 0.110                      | 310.6436  |
| 33   | 12     | 22     | 32    | 12      | 21      | A    | 1           | 197697.396   | 0.022                      | 311.0636  |
| 33   | 12     | 21     | 32    | 12      | 20      | A    | 1           | 197709.412   | -0.059                     | 311.0640  |
| 23   | 7      | 17     | 22    | 6       | 16      | A    | 0           | 197746.667   | -0.533                     | 119.5707  |
| 50   | 18     | 32     | 50    | 17      | 34      | E    | 0           | 197746.667   | -0.313                     | 371.4552  |
| 33   | 12     | 22     | 32    | 12      | 21      | A    | 0           | 197757.010   | 0.093                      | 194.5466  |
| 33   | 12     | 21     | 32    | 12      | 20      | E    | 0           | 197764.307   | 0.090                      | 194.5601  |
| 33   | 12     | 21     | 32    | 12      | 20      | A    | 0           | 197767.890   | -0.188                     | 194.5470  |
| 33   | 12     | 22     | 32    | 12      | 21      | E    | 0           | 197767.890   | 0.345                      | 194.5411  |
| 32   | 7      | 26     | 31    | 6       | 25      | E    | 0           | 197866.154   | -0.124                     | 170.0274  |
| 32   | 7      | 26     | 31    | 6       | 25      | A    | 0           | 197901.028   | -0.139                     | 170.0144  |
| 34   | 6      | 28     | 33    | 7       | 27      | E    | 1           | 198045.094   | 0.140                      | 299.4358  |
| 32   | 7      | 26     | 31    | 6       | 25      | E    | 1           | 198085.514   | 1.156                      | 286.3154  |
| 34   | 6      | 28     | 33    | 7       | 27      | A    | 0           | 198118.102   | 0.276                      | 183.1282  |
| 34   | 6      | 28     | 33    | 7       | 27      | E    | 0           | 198121.944   | 0.042                      | 183.1399  |
| 25   | 7      | 19     | 24    | 6       | 18      | A    | 0           | 198255.661   | -0.487                     | 129.4180  |
| 24   | 7      | 18     | 23    | 6       | 17      | E    | 0           | 198323.611   | -0.289                     | 124.3945  |
| 19   | 6      | 14     | 18    | 4       | 14      | E    | 1           | 198392.779   | 0.055                      | 216.0298  |
| 24   | 7      | 18     | 23    | 6       | 17      | A    | 0           | 198394.704   | -0.392                     | 124.3798  |
| 33   | 11     | 22     | 32    | 11      | 21      | E    | 1           | 198465.069   | 0.123                      | 306.8615  |
| 15   | 2      | 13     | 14    | 1       | 14      | E    | 0           | 198526.455   | -0.081                     | 80.0747   |
| 15   | 2      | 13     | 14    | 1       | 14      | A    | 0           | 198550.190   | 0.228                      | 80.0576   |
| 22   | 6      | 17     | 21    | 5       | 17      | E    | 1           | 198593.321   | 0.506                      | 228.7365  |
| 33   | 11     | 23     | 32    | 11      | 22      | A    | 1           | 198622.748   | 0.002                      | 306.7604  |
| 33   | 11     | 23     | 32    | 11      | 22      | E    | 1           | 198638.381   | 0.139                      | 306.2889  |
| 46   | 3      | 43     | 46    | 2       | 44      | E    | 0           | 198669.663   | -0.193                     | 258.0776  |
| 46   | 4      | 43     | 46    | 2       | 44      | E    | 0           | 198669.663   | -0.193                     | 258.0776  |
| 46   | 4      | 43     | 46    | 3       | 44      | E    | 0           | 198669.663   | -0.193                     | 258.0776  |
| 33   | 11     | 23     | 32    | 11      | 22      | A    | 0           | 198673.263   | 0.162                      | 190.1995  |
| 33   | 8      | 26     | 32    | 8       | 25      | A    | 1           | 198699.868   | -0.023                     | 296.4211  |
| 33   | 11     | 23     | 32    | 11      | 22      | E    | 0           | 198719.728   | 0.092                      | 190.1984  |
| 33   | 11     | 22     | 32    | 11      | 21      | A    | 1           | 198752.348   | 0.052                      | 306.7652  |
| 33   | 11     | 22     | 32    | 11      | 21      | E    | 0           | 198755.527   | 0.074                      | 190.2170  |
| 33   | 11     | 22     | 32    | 11      | 21      | A    | 0           | 198793.631   | 0.105                      | 190.2040  |
| 33   | 8      | 26     | 32    | 8       | 25      | E    | 0           | 198863.514   | 0.022                      | 179.7612  |
| 33   | 8      | 26     | 32    | 8       | 25      | A    | 0           | 198865.943   | 0.053                      | 179.7500  |
| 19   | 8      | 12     | 18    | 7       | 11      | A    | 1           | 198884.820   | 0.024                      | 221.8580  |
| 33   | 8      | 26     | 32    | 8       | 25      | E    | 1           | 199042.417   | 0.067                      | 296.0407  |
| 19   | 8      | 11     | 18    | 7       | 12      | A    | 1           | 199105.128   | 0.213                      | 221.8516  |
| 43   | 10     | 34     | 42    | 10      | 32      | E    | 0           | 199315.634   | 0.626                      | 264.2351  |
| 48   | 18     | 30     | 48    | 17      | 32      | E    | 0           | 199549.452   | 0.535                      | 351.6135  |
| 33   | 10     | 24     | 32    | 10      | 23      | A    | 1           | 199669.753   | -0.027                     | 302.9233  |
| 33   | 10     | 24     | 32    | 10      | 23      | A    | 0           | 199721.676   | 0.078                      | 186.3196  |
| 34   | 31     | 4      | 33    | 31      | 3       | A    | 1           | 199740.635   | -0.334                     | 478.4654  |
| 34   | 31     | 3      | 33    | 31      | 2       | A    | 1           | 199740.635   | -0.334                     | 478.4654  |
| 33   | 10     | 24     | 32    | 10      | 23      | E    | 0           | 199745.325   | 0.108                      | 186.3261  |
| 17   | 9      | 9      | 16    | 8       | 8       | A    | 1           | 199763.204   | 0.217                      | 217.7805  |
| 17   | 9      | 8      | 16    | 8       | 9       | A    | 1           | 199765.241   | 0.476                      | 217.7804  |
| 34   | 29     | 5      | 33    | 29      | 4       | E    | 1           | 199847.244   | -0.191                     | 455.2412  |
| 34   | 29     | 5      | 33    | 29      | 4       | A    | 1           | 199853.325   | -0.246                     | 454.6337  |
| 34   | 29     | 6      | 33    | 29      | 5       | A    | 1           | 199853.325   | -0.246                     | 454.6337  |
| 32   | 7      | 25     | 31    | 7       | 24      | A    | 1           | 199857.267   | 0.085                      | 288.9747  |
| 34   | 29     | 6      | 33    | 29      | 5       | E    | 1           | 199859.542   | -0.129                     | 455.0920  |
| 34   | 31     | 3      | 33    | 31      | 2       | A    | 0           | 199861.222   | -0.377                     | 362.2952  |
| 34   | 31     | 4      | 33    | 31      | 3       | A    | 0           | 199861.222   | -0.377                     | 362.2952  |
| 34   | 31     | 4      | 33    | 31      | 3       | E    | 0           | 199861.222   | -0.394                     | 362.2752  |
| 33   | 7      | 27     | 32    | 6       | 26      | A    | 1           | 199876.684   | 0.208                      | 293.1430  |
| 33   | 10     | 23     | 32    | 10      | 22      | E    | 1           | 199892.178   | 0.023                      | 302.9540  |
| 34   | 30     | 4      | 33    | 30      | 3       | A    | 0           | 199914.361   | -0.371                     | 350.2008  |
| 34   | 30     | 5      | 33    | 30      | 4       | A    | 0           | 199914.361   | -0.371                     | 350.2008  |
| 34   | 28     | 6      | 33    | 28      | 5       | A    | 1           | 199917.729   | -0.061                     | 443.3220  |
| 34   | 28     | 7      | 33    | 28      | 6       | A    | 1           | 199917.729   | -0.061                     | 443.3220  |
| 19   | 8      | 12     | 18    | 7       | 11      | A    | 0           | 199952.683   | -0.116                     | 105.1210  |
| 34   | 29     | 5      | 33    | 29      | 4       | A    | 0           | 199972.191   | -0.290                     | 338.5040  |
| 34   | 29     | 6      | 33    | 29      | 5       | A    | 0           | 199972.191   | -0.290                     | 338.5040  |
| 34   | 27     | 8      | 33    | 27      | 6       | E    | 1           | 199976.449   | -0.175                     | 432.9616  |
| 36   | 4      | 32     | 35    | 5       | 31      | A    | 1           | 199978.525   | -0.218                     | 305.2288  |
| 48   | 4      | 44     | 48    | 3       | 45      | E    | 0           | 199982.930   | 0.350                      | 281.5302  |
| 48   | 5      | 44     | 48    | 3       | 45      | E    | 0           | 199982.930   | 0.350                      | 281.5302  |
| 48   | 5      | 44     | 48    | 4       | 45      | E    | 0           | 199982.930   | 0.350                      | 281.5302  |
| 36   | 5      | 32     | 35    | 5       | 31      | A    | 1           | 199982.933   | -0.209                     | 305.2288  |
| 36   | 4      | 32     | 35    | 4       | 31      | A    | 1           | 199986.603   | -0.150                     | 305.2285  |
| 36   | 5      | 32     | 35    | 4       | 31      | A    | 1           | 199990.864   | -0.288                     | 305.2285  |
| 34   | 27     | 7      | 33    | 27      | 7       | E    | 1           | 199990.864   | 0.215                      | 432.9613  |
| 19   | 8      | 12     | 18    | 7       | 12      | E    | 0           | 200004.532   | 0.017                      | 105.1224  |
| 19   | 8      | 11     | 18    | 7       | 11      | E    | 0           | 200015.823   | 0.037                      | 105.1378  |
| 48   | 4      | 44     | 48    | 3       | 45      | A    | 0           | 200020.543   | 0.192                      | 281.5188  |
| 48   | 5      | 44     | 48    | 3       | 45      | A    | 0           | 200020.543   | 0.192                      | 281.5188  |
| 48   | 5      | 44     | 48    | 4       | 45      | A    | 0           | 200020.543   | 0.192                      | 281.5188  |
| 34   | 28     | 6      | 33    | 28      | 5       | A    | 0           | 200035.417   | -0.140                     | 327.2050  |
| 34   | 28     | 7      | 33    | 28      | 6       | A    | 0           | 200035.417   | -0.140                     | 327.2050  |
| 34   | 28     | 7      | 33    | 28      | 6       | E    | 0           | 200035.417   | -0.402                     | 327.1866  |
| 35   | 6      | 30     | 34    | 6       | 29      | A    | 1           | 200042.041   | 0.107                      | 302.7796  |
| 46   | 18     | 29     | 46    | 17      | 29      | E    | 0           | 200046.590   | 0.061                      | 332.6328  |
| 37   | 3      | 34     | 36    | 3       | 33      | A    | 1           | 200062.737   | -0.125                     | 307.1942  |
| 37   | 4      | 34     | 36    | 3       | 33      | A    | 1           | 200062.737   | -0.125                     | 307.1942  |
| 37   | 3      | 34     | 36    | 4       | 33      | A    | 1           | 200062.737   | -0.125                     | 307.1942  |
| 37   | 4      | 34     | 36    | 4       | 33      | A    | 1           | 200062.737   | -0.125                     | 307.1942  |
| 34   | 26     | 8      | 33    | 26      | 7       | A    | 1           | 200066.271   | -0.093                     | 421.9092  |
| 34   | 26     | 9      | 33    | 26      | 8       | A    | 1           | 200066.271   | -0.093                     | 421.9092  |
| 34   | 26     | 8      | 33    | 26      | 7       | E    | 1           | 200066.271   | 0.308                      | 422.4905  |
| 34   | 7      | 28     | 33    | 7       | 27      | A    | 1           | 200076.892   | -0.013                     | 299.8102  |
| 32   | 7      | 25     | 31    | 7       | 24      | E    | 1           | 200079.844   | -0.259                     | 288.5458  |
| 33   | 10     | 24     | 32    | 10      | 23      | E    | 1           | 200088.445   | 0.164                      | 302.4256  |
| 34   | 27     | 7      | 33    | 27      | 6       | A    | 0           | 200104.720   | -0.090                     | 316.3041  |
| 34   | 27     | 8      | 33    | 27      | 7       | A    | 0           | 200104.720   | -0.090                     | 316.3041  |
| 34   | 27     | 8      | 33    | 27      | 7       | E    | 0           | 200104.720   | -0.279                     | 316.2868  |
| 35   | 5      | 30     | 34    | 6       | 29      | E    | 1           | 200109.329   | -0.144                     | 302.4013  |
| 35   | 5      | 30     | 34    | 6       | 29      | E    | 0           | 200119.419   | 0.000                      | 186.1025  |
| 35   | 5      | 30     | 34    | 6       | 29      | A    | 0           | 200124.776   | -0.181                     | 186.0906  |

| $J'$ | $K'_a$ | $K'_c$ | $J''$ | $K''_a$ | $K''_c$ | Sym. | $v_{tCH_3}$ | $\nu_{Obs.}$ | $\nu_{Obs.} - \nu_{Calc.}$ | $E_{low}$ |
|------|--------|--------|-------|---------|---------|------|-------------|--------------|----------------------------|-----------|
| 35   | 5      | 30     | 34    | 5       | 29      | A    | 1           | 200126.776   | -0.002                     | 302.7728  |
| 33   | 9      | 25     | 32    | 9       | 24      | A    | 1           | 200126.776   | -0.002                     | 299.5288  |
| 34   | 25     | 10     | 33    | 25      | 9       | E    | 1           | 200134.660   | -0.349                     | 412.2671  |
| 32   | 7      | 25     | 31    | 7       | 24      | E    | 0           | 200143.410   | -0.091                     | 172.2664  |
| 36   | 4      | 32     | 35    | 5       | 31      | E    | 1           | 200145.220   | 0.296                      | 304.8377  |
| 36   | 5      | 32     | 35    | 5       | 31      | E    | 1           | 200150.063   | -0.153                     | 304.8377  |
| 32   | 7      | 25     | 31    | 7       | 24      | A    | 0           | 200152.816   | 0.036                      | 172.2526  |
| 36   | 4      | 32     | 35    | 4       | 31      | E    | 1           | 200154.558   | 0.080                      | 304.8374  |
| 36   | 4      | 32     | 35    | 5       | 31      | E    | 0           | 200159.723   | -0.041                     | 188.5398  |
| 36   | 5      | 32     | 35    | 4       | 31      | E    | 1           | 200159.723   | -0.047                     | 304.8374  |
| 19   | 8      | 11     | 18    | 7       | 12      | A    | 0           | 200161.330   | -0.016                     | 105.1149  |
| 36   | 5      | 32     | 35    | 5       | 31      | E    | 0           | 200164.756   | 0.034                      | 188.5398  |
| 36   | 4      | 32     | 35    | 4       | 31      | E    | 0           | 200168.677   | -0.070                     | 188.5395  |
| 36   | 5      | 32     | 35    | 5       | 31      | A    | 0           | 200169.955   | 0.087                      | 188.5276  |
| 36   | 4      | 32     | 35    | 4       | 31      | A    | 0           | 200173.867   | -0.052                     | 188.5273  |
| 36   | 5      | 32     | 35    | 4       | 31      | A    | 0           | 200178.826   | -0.085                     | 188.5273  |
| 34   | 26     | 8      | 33    | 26      | 7       | A    | 0           | 200181.290   | 0.031                      | 305.8016  |
| 34   | 26     | 9      | 33    | 26      | 8       | A    | 0           | 200181.290   | 0.031                      | 305.8016  |
| 34   | 26     | 9      | 33    | 26      | 8       | E    | 0           | 200181.290   | 0.033                      | 305.7833  |
| 37   | 4      | 34     | 36    | 4       | 33      | E    | 1           | 200192.786   | -0.026                     | 306.7809  |
| 37   | 3      | 34     | 36    | 3       | 33      | E    | 1           | 200192.786   | -0.026                     | 306.7809  |
| 37   | 3      | 34     | 36    | 3       | 33      | E    | 0           | 200217.242   | -0.009                     | 190.4872  |
| 37   | 4      | 34     | 36    | 3       | 33      | E    | 0           | 200217.242   | -0.009                     | 190.4872  |
| 37   | 3      | 34     | 36    | 4       | 33      | E    | 0           | 200217.242   | -0.009                     | 190.4872  |
| 37   | 4      | 34     | 36    | 4       | 33      | E    | 0           | 200217.242   | -0.009                     | 190.4872  |
| 37   | 3      | 34     | 36    | 3       | 33      | A    | 0           | 200221.104   | -0.142                     | 190.4742  |
| 37   | 4      | 34     | 36    | 3       | 33      | A    | 0           | 200221.104   | -0.142                     | 190.4742  |
| 37   | 3      | 34     | 36    | 4       | 33      | A    | 0           | 200221.104   | -0.142                     | 190.4743  |
| 37   | 4      | 34     | 36    | 4       | 33      | A    | 0           | 200221.104   | -0.142                     | 190.4743  |
| 34   | 24     | 11     | 33    | 24      | 10      | E    | 1           | 200228.611   | 0.134                      | 402.5167  |
| 34   | 24     | 10     | 33    | 24      | 9       | E    | 1           | 200242.590   | 0.353                      | 402.7373  |
| 35   | 6      | 30     | 34    | 5       | 29      | A    | 1           | 200245.880   | -0.183                     | 302.7728  |
| 35   | 6      | 30     | 34    | 6       | 29      | E    | 1           | 200248.411   | -0.057                     | 302.4013  |
| 35   | 6      | 30     | 34    | 6       | 29      | E    | 0           | 200251.188   | 0.120                      | 186.1025  |
| 35   | 6      | 30     | 34    | 6       | 29      | A    | 0           | 200257.431   | 0.044                      | 186.0906  |
| 34   | 25     | 9      | 33    | 25      | 8       | A    | 0           | 200266.238   | 0.103                      | 295.6980  |
| 34   | 25     | 10     | 33    | 25      | 9       | A    | 0           | 200266.238   | 0.103                      | 295.6980  |
| 34   | 25     | 10     | 33    | 25      | 9       | E    | 0           | 200266.238   | 0.004                      | 295.6788  |
| 34   | 7      | 28     | 33    | 7       | 27      | E    | 0           | 200296.005   | -0.017                     | 183.1399  |
| 34   | 7      | 28     | 33    | 7       | 27      | A    | 0           | 200302.397   | -0.013                     | 183.1282  |
| 34   | 7      | 28     | 33    | 7       | 27      | E    | 1           | 200308.575   | 0.058                      | 299.4358  |
| 38   | 3      | 36     | 37    | 3       | 35      | E    | 1           | 200314.830   | -0.025                     | 308.2687  |
| 38   | 2      | 36     | 37    | 3       | 35      | E    | 1           | 200314.830   | -0.025                     | 308.2687  |
| 38   | 3      | 36     | 37    | 2       | 35      | E    | 1           | 200314.830   | -0.025                     | 308.2687  |
| 38   | 2      | 36     | 37    | 2       | 35      | E    | 1           | 200314.830   | -0.025                     | 308.2687  |
| 35   | 7      | 28     | 34    | 8       | 27      | A    | 0           | 200324.504   | 0.234                      | 193.2001  |
| 34   | 23     | 12     | 33    | 23      | 11      | E    | 1           | 200334.020   | 0.173                      | 393.1655  |
| 35   | 5      | 30     | 34    | 5       | 29      | E    | 0           | 200344.197   | -0.036                     | 186.0950  |
| 34   | 23     | 11     | 33    | 23      | 10      | E    | 1           | 200346.060   | -0.376                     | 393.4549  |
| 35   | 5      | 30     | 34    | 5       | 29      | E    | 1           | 200346.060   | 0.163                      | 302.3934  |
| 38   | 2      | 36     | 37    | 2       | 35      | E    | 0           | 200348.323   | -0.020                     | 191.9820  |
| 38   | 3      | 36     | 37    | 2       | 35      | E    | 0           | 200348.323   | -0.020                     | 191.9820  |
| 38   | 2      | 36     | 37    | 3       | 35      | E    | 0           | 200348.323   | -0.020                     | 191.9820  |
| 38   | 3      | 36     | 37    | 3       | 35      | E    | 0           | 200348.323   | -0.020                     | 191.9820  |
| 38   | 2      | 36     | 37    | 2       | 35      | A    | 0           | 200351.160   | -0.026                     | 191.9681  |
| 38   | 3      | 36     | 37    | 2       | 35      | A    | 0           | 200351.160   | -0.026                     | 191.9681  |
| 38   | 2      | 36     | 37    | 3       | 35      | A    | 0           | 200351.160   | -0.026                     | 191.9681  |
| 38   | 3      | 36     | 37    | 3       | 35      | A    | 0           | 200351.160   | -0.026                     | 191.9681  |
| 35   | 5      | 30     | 34    | 5       | 29      | A    | 0           | 200351.160   | -0.026                     | 186.0831  |
| 47   | 18     | 29     | 47    | 17      | 31      | E    | 0           | 200351.160   | 0.159                      | 342.0092  |
| 35   | 7      | 28     | 34    | 8       | 27      | E    | 0           | 200356.948   | -0.165                     | 193.2111  |
| 34   | 23     | 12     | 33    | 23      | 11      | A    | 1           | 200358.708   | 0.220                      | 392.8215  |
| 34   | 23     | 11     | 33    | 23      | 10      | A    | 1           | 200358.708   | 0.220                      | 392.8215  |
| 34   | 24     | 10     | 33    | 24      | 9       | A    | 0           | 200361.076   | 0.133                      | 285.9936  |
| 34   | 24     | 11     | 33    | 24      | 10      | A    | 0           | 200361.076   | 0.133                      | 285.9936  |
| 34   | 24     | 11     | 33    | 24      | 10      | E    | 0           | 200361.076   | -0.086                     | 285.9739  |
| 39   | 1      | 38     | 38    | 1       | 37      | A    | 1           | 200417.586   | -0.029                     | 309.8092  |
| 39   | 2      | 38     | 38    | 1       | 37      | A    | 1           | 200417.586   | -0.029                     | 309.8092  |
| 39   | 1      | 38     | 38    | 2       | 37      | A    | 1           | 200417.586   | -0.029                     | 309.8092  |
| 39   | 2      | 38     | 38    | 2       | 37      | A    | 1           | 200417.586   | -0.029                     | 309.8092  |
| 34   | 22     | 13     | 33    | 22      | 12      | E    | 1           | 200453.478   | 0.033                      | 384.2150  |
| 34   | 22     | 12     | 33    | 22      | 11      | E    | 1           | 200464.314   | 0.152                      | 384.5690  |
| 34   | 23     | 11     | 33    | 23      | 10      | A    | 0           | 200467.714   | 0.185                      | 276.6890  |
| 34   | 23     | 12     | 33    | 23      | 11      | A    | 0           | 200467.714   | 0.185                      | 276.6890  |
| 34   | 23     | 12     | 33    | 23      | 11      | E    | 0           | 200467.714   | -0.176                     | 276.6691  |
| 39   | 2      | 38     | 38    | 2       | 37      | E    | 1           | 200473.973   | -0.055                     | 309.3252  |
| 39   | 1      | 38     | 38    | 2       | 37      | E    | 1           | 200473.973   | -0.055                     | 309.3252  |
| 39   | 2      | 38     | 38    | 1       | 37      | E    | 1           | 200473.973   | -0.055                     | 309.3252  |
| 39   | 1      | 38     | 38    | 1       | 37      | E    | 1           | 200473.973   | -0.055                     | 309.3252  |
| 35   | 6      | 30     | 34    | 5       | 29      | E    | 0           | 200475.898   | 0.016                      | 186.0950  |
| 34   | 22     | 12     | 33    | 22      | 11      | A    | 1           | 200481.668   | 0.123                      | 383.9355  |
| 34   | 22     | 13     | 33    | 22      | 12      | A    | 1           | 200481.668   | 0.123                      | 383.9355  |
| 35   | 6      | 30     | 34    | 5       | 29      | A    | 0           | 200483.493   | 0.020                      | 186.0831  |
| 35   | 6      | 30     | 34    | 5       | 29      | E    | 1           | 200484.992   | 0.100                      | 302.3934  |
| 39   | 1      | 38     | 38    | 1       | 37      | E    | 0           | 200516.616   | -0.085                     | 193.0483  |
| 39   | 2      | 38     | 38    | 1       | 37      | E    | 0           | 200516.616   | -0.085                     | 193.0483  |
| 39   | 1      | 38     | 38    | 2       | 37      | E    | 0           | 200516.616   | -0.085                     | 193.0483  |
| 39   | 2      | 38     | 38    | 2       | 37      | E    | 0           | 200516.616   | -0.085                     | 193.0483  |
| 39   | 1      | 38     | 38    | 1       | 37      | A    | 0           | 200518.416   | -0.008                     | 193.0332  |
| 39   | 2      | 38     | 38    | 1       | 37      | A    | 0           | 200518.416   | -0.008                     | 193.0332  |
| 39   | 1      | 38     | 38    | 2       | 37      | A    | 0           | 200518.416   | -0.008                     | 193.0332  |
| 39   | 2      | 38     | 38    | 2       | 37      | A    | 0           | 200518.416   | -0.008                     | 193.0332  |
| 34   | 22     | 12     | 33    | 22      | 11      | A    | 0           | 200588.488   | 0.297                      | 267.7849  |
| 34   | 22     | 13     | 33    | 22      | 12      | A    | 0           | 200588.488   | 0.297                      | 267.7849  |
| 34   | 22     | 13     | 33    | 22      | 12      | E    | 0           | 200588.488   | -0.229                     | 267.7650  |
| 34   | 21     | 13     | 33    | 21      | 12      | E    | 1           | 200598.609   | 0.405                      | 376.0799  |
| 34   | 21     | 14     | 33    | 21      | 13      | A    | 1           | 200621.997   | 0.191                      | 375.4554  |
| 34   | 21     | 13     | 33    | 21      | 12      | A    | 1           | 200621.997   | 0.191                      | 375.4554  |
| 40   | 0      | 40     | 39    | 0       | 39      | A    | 1           | 200632.404   | -0.030                     | 310.4995  |
| 40   | 1      | 40     | 39    | 0       | 39      | A    | 1           | 200632.404   | -0.030                     | 310.4995  |
| 40   | 0      | 40     | 39    | 1       | 39      | A    | 1           | 200632.404   | -0.030                     | 310.4995  |
| 40   | 1      | 40     | 39    | 1       | 39      | A    | 1           | 200632.404   | -0.030                     | 310.4995  |
| 40   | 1      | 40     | 39    | 1       | 39      | E    | 1           | 200648.105   | -0.084                     | 309.9666  |
| 40   | 1      | 40     | 39    | 0       | 39      | E    | 1           | 200648.105   | -0.084                     | 309.9666  |
| 40   | 0      | 40     | 39    | 0       | 39      | E    | 1           | 200648.105   | -0.084                     | 309.9666  |
| 33   | 10     | 23     | 32    | 10      | 22      | E    | 0           | 200656.160   | -0.014                     | 186.3728  |
| 33   | 10     | 23     | 32    | 10      | 22      | A    | 0           | 200668.383   | 0.064                      | 186.3630  |
| 33   | 10     | 23     | 32    | 10      | 22      | A    | 1           | 200676.125   | -0.080                     | 302.9698  |
| 40   | 0      | 40     | 39    | 0       | 39      | A    | 0           | 200701.115   | -0.216                     | 193.6856  |
| 40   | 1      | 40     | 39    | 0       | 39      | A    | 0           | 200701.115   | -0.216                     | 193.6856  |
| 40   | 0      | 40     | 39    | 1       | 39      | A    | 0           | 200701.115   | -0.216                     | 193.6856  |
| 40   | 1      | 40     | 39    | 1       | 39      | A    | 0           | 200701.115   | -0.216                     | 193.6856  |
| 40   | 0      | 40     | 39    | 0       | 39      | E    | 0           | 200701.115   | 0.263                      | 193.7022  |
| 40   | 1      | 40     | 39    | 0       | 39      | E    | 0           | 200701.115   | 0.263                      | 193.7022  |
| 40   | 0      | 40     | 39    | 1       | 39      | E    | 0           | 200701.115   | 0.263                      | 193.7022  |
| 40   | 1      | 40     | 39    | 1       | 39      | E    | 0           | 200701.115   | 0.263                      | 193.7022  |

| $J'$ | $K'_a$ | $K'_c$ | $J''$ | $K''_a$ | $K''_c$ | Sym. | $v_{tCH_3}$ | $\nu_{Obs.}$ | $\nu_{Obs.} - \nu_{Calc.}$ | $E_{low}$ |
|------|--------|--------|-------|---------|---------|------|-------------|--------------|----------------------------|-----------|
| 34   | 21     | 13     | 33    | 21      | 12      | A    | 0           | 200726.078   | 0.267                      | 259.2821  |
| 34   | 21     | 14     | 33    | 21      | 13      | A    | 0           | 200726.078   | 0.267                      | 259.2821  |
| 34   | 21     | 14     | 33    | 21      | 13      | E    | 0           | 200726.078   | -0.451                     | 259.2625  |
| 34   | 20     | 15     | 33    | 20      | 14      | E    | 1           | 200747.851   | 0.043                      | 367.5212  |
| 34   | 20     | 14     | 33    | 20      | 13      | E    | 1           | 200752.273   | 0.159                      | 367.9885  |
| 34   | 20     | 14     | 33    | 20      | 13      | A    | 1           | 200783.069   | 0.107                      | 367.3817  |
| 34   | 20     | 15     | 33    | 20      | 14      | A    | 1           | 200783.069   | 0.107                      | 367.3817  |
| 33   | 16     | 17     | 33    | 15      | 19      | E    | 1           | 200808.185   | -0.932                     | 332.9273  |
| 17   | 9      | 9      | 16    | 8       | 9       | E    | 0           | 200828.340   | -0.019                     | 101.0774  |
| 34   | 20     | 14     | 33    | 20      | 13      | A    | 0           | 200884.199   | 0.140                      | 251.1814  |
| 34   | 20     | 15     | 33    | 20      | 14      | A    | 0           | 200884.199   | 0.140                      | 251.1814  |
| 34   | 20     | 15     | 33    | 20      | 14      | E    | 0           | 200885.092   | 0.090                      | 251.1624  |
| 33   | 24     | 9      | 32    | 24      | 9       | E    | 1           | 200892.354   | -0.156                     | 396.0362  |
| 17   | 9      | 9      | 16    | 8       | 8       | A    | 0           | 200898.006   | 0.048                      | 101.0749  |
| 17   | 9      | 8      | 16    | 8       | 9       | A    | 0           | 200899.652   | 0.025                      | 101.0748  |
| 34   | 19     | 15     | 33    | 19      | 14      | E    | 1           | 200930.851   | 0.069                      | 360.2955  |
| 34   | 19     | 16     | 33    | 19      | 15      | E    | 1           | 200930.851   | 0.069                      | 359.7814  |
| 34   | 19     | 15     | 33    | 19      | 14      | A    | 1           | 200969.925   | 0.142                      | 359.7154  |
| 34   | 19     | 16     | 33    | 19      | 15      | A    | 1           | 200969.925   | 0.142                      | 359.7154  |
| 50   | 5      | 45     | 50    | 4       | 46      | A    | 0           | 201032.285   | -0.049                     | 305.9989  |
| 50   | 6      | 45     | 50    | 4       | 46      | A    | 0           | 201032.285   | -0.049                     | 305.9989  |
| 50   | 5      | 45     | 50    | 5       | 46      | A    | 0           | 201032.285   | -0.049                     | 305.9989  |
| 50   | 6      | 45     | 50    | 5       | 46      | A    | 0           | 201032.285   | -0.049                     | 305.9989  |
| 32   | 8      | 24     | 31    | 8       | 23      | E    | 1           | 201032.285   | 0.192                      | 290.4689  |
| 34   | 19     | 15     | 33    | 19      | 14      | A    | 0           | 201067.609   | -0.064                     | 243.4843  |
| 34   | 19     | 16     | 33    | 19      | 15      | A    | 0           | 201067.609   | -0.064                     | 243.4843  |
| 34   | 19     | 16     | 33    | 19      | 15      | E    | 0           | 201069.022   | 0.143                      | 243.4661  |
| 50   | 6      | 45     | 50    | 5       | 46      | E    | 1           | 201122.797   | 0.046                      | 422.2920  |
| 50   | 5      | 45     | 50    | 5       | 46      | E    | 1           | 201122.797   | 0.046                      | 422.2920  |
| 50   | 6      | 45     | 50    | 4       | 46      | E    | 1           | 201122.797   | 0.046                      | 422.2920  |
| 50   | 5      | 45     | 50    | 4       | 46      | E    | 1           | 201122.797   | 0.046                      | 422.2920  |
| 33   | 9      | 25     | 32    | 9       | 24      | E    | 1           | 201130.704   | 0.160                      | 299.0889  |
| 34   | 18     | 16     | 33    | 18      | 15      | E    | 1           | 201139.437   | 0.159                      | 353.0026  |
| 34   | 18     | 17     | 33    | 18      | 16      | E    | 1           | 201146.393   | 0.048                      | 352.4490  |
| 34   | 18     | 17     | 33    | 18      | 16      | A    | 1           | 201188.708   | 0.176                      | 352.4576  |
| 34   | 18     | 16     | 33    | 18      | 15      | A    | 1           | 201188.708   | 0.176                      | 352.4576  |
| 15   | 10     | 5      | 14    | 9       | 5       | E    | 0           | 201198.220   | 0.209                      | 98.3216   |
| 34   | 6      | 28     | 33    | 6       | 27      | A    | 1           | 201225.264   | 0.071                      | 299.7050  |
| 15   | 10     | 6      | 14    | 9       | 5       | A    | 0           | 201236.689   | 0.341                      | 98.3043   |
| 15   | 10     | 5      | 14    | 9       | 6       | A    | 0           | 201236.689   | 0.341                      | 98.3043   |
| 15   | 10     | 6      | 14    | 9       | 6       | E    | 1           | 201267.997   | -0.230                     | 214.4269  |
| 34   | 18     | 16     | 33    | 18      | 15      | A    | 0           | 201282.869   | -0.002                     | 236.1923  |
| 34   | 18     | 17     | 33    | 18      | 16      | A    | 0           | 201282.869   | -0.002                     | 236.1923  |
| 34   | 18     | 16     | 33    | 18      | 15      | E    | 0           | 201284.469   | 0.170                      | 236.1926  |
| 34   | 18     | 17     | 33    | 18      | 16      | E    | 0           | 201284.469   | 0.170                      | 236.1753  |
| 34   | 17     | 17     | 33    | 17      | 16      | E    | 1           | 201386.648   | 0.089                      | 346.1117  |
| 34   | 17     | 18     | 33    | 17      | 17      | E    | 1           | 201402.168   | 0.141                      | 345.5269  |
| 34   | 17     | 18     | 33    | 17      | 17      | A    | 1           | 201447.822   | 0.214                      | 345.6100  |
| 34   | 17     | 17     | 33    | 17      | 16      | A    | 1           | 201447.822   | 0.214                      | 345.6100  |
| 36   | 11     | 26     | 35    | 11      | 24      | E    | 1           | 201501.051   | 0.203                      | 327.3645  |
| 34   | 6      | 28     | 33    | 6       | 27      | E    | 0           | 201524.657   | 0.075                      | 183.0264  |
| 34   | 6      | 28     | 33    | 6       | 27      | A    | 0           | 201535.807   | -0.026                     | 183.0142  |
| 34   | 17     | 17     | 33    | 17      | 16      | A    | 0           | 201538.020   | 0.036                      | 229.3075  |
| 34   | 17     | 18     | 33    | 17      | 17      | A    | 0           | 201538.020   | 0.036                      | 229.3075  |
| 34   | 17     | 17     | 33    | 17      | 16      | E    | 0           | 201539.767   | 0.120                      | 229.3102  |
| 34   | 17     | 18     | 33    | 17      | 17      | E    | 0           | 201539.767   | 0.120                      | 229.2918  |
| 34   | 6      | 28     | 33    | 6       | 27      | E    | 1           | 201569.865   | -0.107                     | 299.3182  |
| 13   | 11     | 3      | 12    | 10      | 3       | E    | 1           | 201615.357   | 0.277                      | 212.8861  |
| 32   | 8      | 24     | 31    | 8       | 23      | A    | 1           | 201620.081   | -0.073                     | 290.8388  |
| 21   | 6      | 15     | 20    | 5       | 16      | A    | 0           | 201632.573   | -0.230                     | 108.2724  |
| 32   | 8      | 24     | 31    | 8       | 23      | A    | 0           | 201648.212   | 0.106                      | 174.1353  |
| 32   | 8      | 24     | 31    | 8       | 23      | E    | 0           | 201654.145   | 0.116                      | 174.1482  |
| 34   | 16     | 18     | 33    | 16      | 17      | E    | 1           | 201683.351   | 0.051                      | 339.6256  |
| 34   | 16     | 19     | 33    | 16      | 18      | E    | 1           | 201709.890   | 0.136                      | 339.0182  |
| 34   | 16     | 19     | 33    | 16      | 18      | A    | 1           | 201758.662   | 0.113                      | 339.1749  |
| 34   | 16     | 18     | 33    | 16      | 17      | A    | 1           | 201758.662   | 0.113                      | 339.1749  |
| 31   | 16     | 15     | 30    | 16      | 15      | E    | 1           | 201768.066   | 0.303                      | 320.0480  |
| 34   | 16     | 18     | 33    | 16      | 17      | A    | 0           | 201844.462   | 0.014                      | 222.8328  |
| 34   | 16     | 19     | 33    | 16      | 18      | A    | 0           | 201844.462   | 0.014                      | 222.8328  |
| 34   | 16     | 18     | 33    | 16      | 17      | E    | 0           | 201846.445   | 0.065                      | 222.8378  |
| 34   | 16     | 19     | 33    | 16      | 18      | E    | 0           | 201846.445   | 0.065                      | 222.8187  |
| 45   | 2      | 43     | 45    | 1       | 44      | E    | 0           | 201858.441   | -0.133                     | 243.3393  |
| 45   | 3      | 43     | 45    | 1       | 44      | E    | 0           | 201858.441   | -0.133                     | 243.3393  |
| 45   | 3      | 43     | 45    | 2       | 44      | E    | 0           | 201858.441   | -0.133                     | 243.3393  |
| 34   | 15     | 19     | 33    | 15      | 18      | E    | 1           | 202045.118   | 0.119                      | 333.5480  |
| 34   | 15     | 20     | 33    | 15      | 19      | E    | 1           | 202086.059   | 0.056                      | 332.9273  |
| 34   | 15     | 20     | 33    | 15      | 19      | A    | 1           | 202137.810   | 0.101                      | 333.1558  |
| 34   | 15     | 19     | 33    | 15      | 18      | A    | 1           | 202137.810   | 0.101                      | 333.1558  |
| 45   | 3      | 43     | 45    | 2       | 44      | E    | 1           | 202167.725   | -0.233                     | 359.6053  |
| 45   | 2      | 43     | 45    | 2       | 44      | E    | 1           | 202167.725   | -0.233                     | 359.6053  |
| 45   | 3      | 43     | 45    | 1       | 44      | E    | 1           | 202167.725   | -0.233                     | 359.6053  |
| 45   | 2      | 43     | 45    | 1       | 44      | E    | 1           | 202167.725   | -0.233                     | 359.6053  |
| 34   | 15     | 19     | 33    | 15      | 18      | A    | 0           | 202218.475   | 0.025                      | 216.7721  |
| 34   | 15     | 20     | 33    | 15      | 19      | A    | 0           | 202218.475   | 0.025                      | 216.7721  |
| 34   | 15     | 19     | 33    | 15      | 18      | E    | 0           | 202220.201   | 0.127                      | 216.7793  |
| 34   | 15     | 20     | 33    | 15      | 19      | E    | 0           | 202221.475   | 0.155                      | 216.7598  |
| 24   | 10     | 15     | 24    | 8       | 16      | A    | 1           | 202258.778   | -0.229                     | 250.5102  |
| 18   | 10     | 9      | 17    | 9       | 8       | E    | 1           | 202412.123   | -0.027                     | 224.4386  |
| 34   | 14     | 20     | 33    | 14      | 19      | E    | 1           | 202494.546   | 0.169                      | 327.8844  |
| 33   | 31     | 2      | 32    | 31      | 2       | E    | 1           | 202517.573   | 0.506                      | 472.3443  |
| 34   | 14     | 21     | 33    | 14      | 20      | E    | 1           | 202555.127   | 0.031                      | 327.2603  |
| 34   | 14     | 21     | 33    | 14      | 20      | A    | 1           | 202609.286   | 0.075                      | 327.5575  |
| 34   | 14     | 20     | 33    | 14      | 19      | A    | 1           | 202609.286   | 0.075                      | 327.5575  |
| 34   | 14     | 20     | 33    | 14      | 19      | A    | 0           | 202683.903   | 0.070                      | 211.1308  |
| 34   | 14     | 21     | 33    | 14      | 20      | A    | 0           | 202683.903   | 0.070                      | 211.1308  |
| 34   | 14     | 20     | 33    | 14      | 19      | E    | 0           | 202685.659   | 0.140                      | 211.1402  |
| 34   | 14     | 21     | 33    | 14      | 20      | E    | 0           | 202687.519   | 0.123                      | 211.1206  |
| 34   | 13     | 21     | 33    | 13      | 20      | E    | 1           | 203066.614   | 0.060                      | 322.6427  |
| 34   | 13     | 22     | 33    | 13      | 21      | E    | 1           | 203155.104   | 0.115                      | 322.0257  |
| 34   | 13     | 22     | 33    | 13      | 21      | A    | 1           | 203209.766   | 0.012                      | 322.3877  |
| 34   | 13     | 21     | 33    | 13      | 20      | A    | 1           | 203211.682   | 0.076                      | 322.3878  |
| 22   | 7      | 16     | 21    | 6       | 16      | E    | 1           | 203241.065   | 0.402                      | 230.9274  |
| 34   | 13     | 22     | 33    | 13      | 21      | A    | 0           | 203276.888   | 0.041                      | 205.9171  |
| 34   | 13     | 21     | 33    | 13      | 20      | E    | 0           | 203279.187   | -0.230                     | 205.9286  |
| 34   | 13     | 22     | 33    | 13      | 21      | E    | 0           | 203282.280   | 0.096                      | 205.9092  |
| 33   | 9      | 24     | 32    | 9       | 23      | E    | 1           | 203368.238   | 0.149                      | 299.6214  |
| 25   | 6      | 19     | 24    | 5       | 19      | E    | 1           | 203437.607   | 0.389                      | 244.2007  |
| 47   | 3      | 44     | 47    | 2       | 45      | E    | 0           | 203464.918   | -0.213                     | 266.2479  |
| 47   | 4      | 44     | 47    | 2       | 45      | E    | 0           | 203464.918   | -0.213                     | 266.2479  |
| 47   | 4      | 44     | 47    | 3       | 45      | E    | 0           | 203464.918   | -0.213                     | 266.2479  |
| 47   | 3      | 44     | 47    | 2       | 45      | A    | 0           | 203508.058   | -0.172                     | 266.2350  |
| 47   | 4      | 44     | 47    | 2       | 45      | A    | 0           | 203508.058   | -0.172                     | 266.2350  |
| 47   | 3      | 44     | 47    | 3       | 45      | A    | 0           | 203508.058   | -0.172                     | 266.2350  |
| 47   | 4      | 44     | 47    | 3       | 45      | A    | 0           | 203508.058   | -0.172                     | 266.2350  |
| 34   | 7      | 28     | 33    | 6       | 27      | E    | 0           | 203698.579   | -0.122                     | 183.0264  |
| 34   | 7      | 28     | 33    | 6       | 27      | A    | 0           | 203720.388   | -0.030                     | 183.0142  |



| $J'$ | $K'_a$ | $K'_c$ | $J''$ | $K''_a$ | $K''_c$ | Sym. | $v_{tCH_3}$ | $\nu_{Obs.}$ | $\nu_{Obs.} - \nu_{Calc.}$ | $E_{low}$ |
|------|--------|--------|-------|---------|---------|------|-------------|--------------|----------------------------|-----------|
| 35   | 26     | 10     | 34    | 26      | 8       | E    | 1           | 203737.195   | 0.051                      | 429.1640  |
| 34   | 12     | 22     | 33    | 12      | 21      | E    | 1           | 203820.331   | 0.090                      | 317.8352  |
| 35   | 6      | 29     | 34    | 7       | 28      | A    | 1           | 203825.248   | -0.115                     | 306.4840  |
| 35   | 6      | 29     | 34    | 7       | 28      | E    | 1           | 203884.105   | 0.056                      | 306.1173  |
| 35   | 6      | 29     | 34    | 7       | 28      | A    | 0           | 203938.708   | 0.253                      | 189.8096  |
| 35   | 6      | 29     | 34    | 7       | 28      | E    | 0           | 203938.708   | 0.049                      | 189.8210  |
| 34   | 12     | 23     | 33    | 12      | 22      | E    | 1           | 203950.165   | 0.101                      | 317.2366  |
| 34   | 12     | 23     | 33    | 12      | 22      | A    | 1           | 203994.067   | -0.019                     | 317.6581  |
| 34   | 12     | 23     | 33    | 12      | 21      | A    | 1           | 204017.681   | 0.018                      | 317.6588  |
| 34   | 12     | 23     | 33    | 12      | 22      | A    | 0           | 204051.930   | 0.122                      | 201.1431  |
| 34   | 12     | 22     | 33    | 12      | 21      | E    | 0           | 204065.079   | 0.053                      | 201.1568  |
| 31   | 7      | 25     | 31    | 5       | 27      | E    | 0           | 204067.916   | 0.301                      | 163.4795  |
| 34   | 12     | 22     | 33    | 12      | 21      | A    | 0           | 204073.614   | 0.029                      | 201.1438  |
| 34   | 8      | 27     | 33    | 8       | 26      | A    | 1           | 204169.957   | -0.033                     | 303.0490  |
| 34   | 8      | 27     | 33    | 8       | 26      | E    | 0           | 204353.699   | 0.041                      | 186.3946  |
| 34   | 8      | 27     | 33    | 8       | 26      | A    | 0           | 204357.288   | 0.046                      | 186.3835  |
| 34   | 8      | 27     | 33    | 8       | 26      | E    | 1           | 204454.459   | 0.079                      | 302.6801  |
| 34   | 25     | 9      | 33    | 25      | 9       | E    | 1           | 204607.249   | -0.326                     | 412.2671  |
| 33   | 7      | 26     | 32    | 7       | 25      | A    | 1           | 204619.408   | 0.067                      | 295.6412  |
| 33   | 9      | 24     | 32    | 9       | 23      | A    | 0           | 204725.660   | 0.120                      | 183.1788  |
| 33   | 9      | 24     | 32    | 9       | 23      | E    | 0           | 204735.843   | 0.066                      | 183.1898  |
| 49   | 4      | 45     | 49    | 3       | 46      | E    | 0           | 204801.878   | 0.186                      | 290.1908  |
| 49   | 5      | 45     | 49    | 3       | 46      | E    | 0           | 204801.878   | 0.186                      | 290.1908  |
| 49   | 5      | 45     | 49    | 4       | 46      | E    | 0           | 204801.878   | 0.186                      | 290.1908  |
| 33   | 9      | 24     | 32    | 9       | 23      | A    | 1           | 204807.291   | -0.065                     | 299.8363  |
| 49   | 4      | 45     | 49    | 3       | 46      | A    | 0           | 204840.538   | 0.169                      | 290.1796  |
| 49   | 5      | 45     | 49    | 3       | 46      | A    | 0           | 204840.538   | 0.169                      | 290.1796  |
| 49   | 5      | 45     | 49    | 4       | 46      | A    | 0           | 204840.538   | 0.169                      | 290.1796  |
| 34   | 11     | 23     | 33    | 11      | 22      | E    | 1           | 204869.075   | 0.098                      | 313.4816  |
| 36   | 5      | 31     | 35    | 6       | 30      | A    | 1           | 204897.394   | 0.061                      | 309.4523  |
| 37   | 4      | 33     | 36    | 5       | 32      | A    | 1           | 204919.882   | -0.102                     | 311.8995  |
| 37   | 5      | 33     | 36    | 5       | 32      | A    | 1           | 204922.345   | -0.041                     | 311.8995  |
| 37   | 4      | 33     | 36    | 4       | 32      | A    | 1           | 204924.332   | -0.052                     | 311.8994  |
| 37   | 5      | 33     | 36    | 4       | 32      | A    | 1           | 204926.736   | -0.049                     | 311.8994  |
| 33   | 7      | 26     | 32    | 7       | 25      | E    | 0           | 204958.057   | -0.009                     | 178.9425  |
| 33   | 7      | 26     | 32    | 7       | 25      | E    | 1           | 204960.533   | -0.189                     | 295.2198  |
| 36   | 6      | 31     | 35    | 6       | 30      | A    | 1           | 204966.001   | -0.011                     | 309.4523  |
| 33   | 7      | 26     | 32    | 7       | 25      | A    | 0           | 204970.535   | -0.001                     | 178.9290  |
| 49   | 5      | 45     | 49    | 4       | 46      | E    | 1           | 204991.575   | 0.088                      | 406.4692  |
| 49   | 4      | 45     | 49    | 3       | 46      | E    | 1           | 204991.575   | 0.088                      | 406.4692  |
| 49   | 5      | 45     | 49    | 3       | 46      | E    | 1           | 204991.575   | 0.088                      | 406.4692  |
| 49   | 4      | 45     | 49    | 3       | 46      | E    | 1           | 204991.575   | 0.088                      | 406.4692  |
| 34   | 11     | 24     | 33    | 11      | 23      | A    | 1           | 205003.720   | 0.062                      | 313.3858  |
| 38   | 3      | 35     | 37    | 3       | 34      | A    | 1           | 205012.179   | -0.067                     | 313.8675  |
| 38   | 4      | 35     | 37    | 3       | 34      | A    | 1           | 205012.179   | -0.067                     | 313.8675  |
| 38   | 3      | 35     | 37    | 4       | 34      | A    | 1           | 205012.179   | -0.067                     | 313.8675  |
| 38   | 4      | 35     | 37    | 4       | 34      | A    | 1           | 205012.179   | -0.067                     | 313.8675  |
| 36   | 5      | 31     | 35    | 5       | 30      | A    | 1           | 205016.312   | -0.019                     | 309.4484  |
| 34   | 11     | 24     | 33    | 11      | 23      | A    | 0           | 205052.789   | 0.091                      | 196.8265  |
| 34   | 11     | 24     | 33    | 11      | 23      | E    | 1           | 205064.426   | 0.128                      | 312.9148  |
| 35   | 7      | 29     | 34    | 7       | 28      | A    | 1           | 205075.777   | 0.007                      | 306.4840  |
| 37   | 4      | 33     | 36    | 5       | 32      | E    | 1           | 205084.965   | -0.028                     | 311.5140  |
| 36   | 6      | 31     | 35    | 5       | 30      | A    | 1           | 205084.980   | -0.030                     | 309.4484  |
| 37   | 5      | 33     | 36    | 5       | 32      | E    | 1           | 205087.893   | -0.013                     | 311.5140  |
| 37   | 4      | 33     | 36    | 4       | 32      | E    | 1           | 205090.253   | -0.033                     | 311.5138  |
| 37   | 5      | 33     | 36    | 4       | 32      | E    | 1           | 205093.102   | -0.096                     | 311.5138  |
| 36   | 5      | 31     | 35    | 6       | 30      | E    | 0           | 205099.557   | -0.030                     | 192.7821  |
| 37   | 4      | 33     | 36    | 5       | 32      | E    | 0           | 205101.791   | -0.080                     | 195.2166  |
| 37   | 5      | 33     | 36    | 5       | 32      | E    | 0           | 205104.548   | -0.041                     | 195.2166  |
| 37   | 4      | 33     | 36    | 5       | 32      | A    | 0           | 205107.003   | 0.051                      | 195.2045  |
| 37   | 4      | 33     | 36    | 4       | 32      | E    | 0           | 205107.003   | -0.043                     | 195.2164  |
| 34   | 11     | 24     | 33    | 11      | 23      | E    | 0           | 205107.003   | -0.043                     | 196.8270  |
| 37   | 5      | 33     | 36    | 5       | 32      | A    | 0           | 205109.577   | -0.112                     | 195.2045  |
| 37   | 5      | 33     | 36    | 4       | 32      | E    | 0           | 205109.577   | 0.030                      | 195.2164  |
| 37   | 4      | 33     | 36    | 4       | 32      | A    | 0           | 205111.884   | -0.059                     | 195.2043  |
| 37   | 5      | 33     | 36    | 4       | 32      | A    | 0           | 205114.712   | 0.030                      | 195.2043  |
| 38   | 3      | 35     | 37    | 3       | 34      | E    | 0           | 205167.663   | -0.002                     | 197.1657  |
| 38   | 4      | 35     | 37    | 3       | 34      | E    | 0           | 205167.663   | -0.002                     | 197.1657  |
| 38   | 3      | 35     | 37    | 4       | 34      | E    | 0           | 205167.663   | -0.002                     | 197.1657  |
| 38   | 4      | 35     | 37    | 4       | 34      | E    | 0           | 205167.663   | -0.002                     | 197.1657  |
| 38   | 3      | 35     | 37    | 3       | 34      | A    | 0           | 205171.616   | -0.020                     | 197.1529  |
| 38   | 4      | 35     | 37    | 3       | 34      | A    | 0           | 205171.616   | -0.020                     | 197.1529  |
| 38   | 3      | 35     | 37    | 4       | 34      | A    | 0           | 205171.616   | -0.020                     | 197.1529  |
| 38   | 4      | 35     | 37    | 4       | 34      | A    | 0           | 205171.616   | -0.020                     | 197.1529  |
| 39   | 2      | 37     | 38    | 2       | 36      | A    | 1           | 205174.178   | -0.080                     | 315.3915  |
| 39   | 3      | 37     | 38    | 2       | 36      | A    | 1           | 205174.178   | -0.080                     | 315.3915  |
| 39   | 2      | 37     | 38    | 3       | 36      | A    | 1           | 205174.178   | -0.080                     | 315.3915  |
| 39   | 3      | 37     | 38    | 3       | 36      | A    | 1           | 205174.178   | -0.080                     | 315.3915  |
| 36   | 6      | 31     | 35    | 6       | 30      | E    | 0           | 205175.950   | 0.038                      | 192.7821  |
| 36   | 6      | 31     | 35    | 6       | 30      | A    | 0           | 205182.219   | 0.019                      | 192.7705  |
| 34   | 11     | 23     | 33    | 11      | 22      | E    | 0           | 205222.796   | 0.072                      | 196.8468  |
| 37   | 18     | 19     | 37    | 17      | 20      | A    | 0           | 205228.917   | 0.203                      | 257.4142  |
| 37   | 18     | 20     | 37    | 17      | 21      | A    | 0           | 205228.917   | 0.203                      | 257.4142  |
| 36   | 5      | 31     | 35    | 5       | 30      | E    | 1           | 205228.917   | 0.029                      | 309.0762  |
| 36   | 5      | 31     | 35    | 5       | 30      | E    | 0           | 205231.447   | 0.210                      | 192.7777  |
| 34   | 11     | 23     | 33    | 11      | 22      | A    | 1           | 205234.677   | 0.012                      | 313.3949  |
| 36   | 5      | 31     | 35    | 5       | 30      | A    | 0           | 205237.766   | -0.068                     | 192.7661  |
| 34   | 11     | 23     | 33    | 11      | 22      | A    | 0           | 205267.792   | 0.006                      | 196.8350  |
| 39   | 3      | 37     | 38    | 3       | 36      | E    | 1           | 205267.792   | 0.034                      | 314.9504  |
| 39   | 2      | 37     | 38    | 3       | 36      | E    | 1           | 205267.792   | 0.034                      | 314.9504  |
| 39   | 3      | 37     | 38    | 2       | 36      | E    | 1           | 205267.792   | 0.034                      | 314.9504  |
| 39   | 2      | 37     | 38    | 2       | 36      | E    | 1           | 205267.792   | 0.034                      | 314.9504  |
| 39   | 2      | 37     | 38    | 2       | 36      | E    | 0           | 205302.752   | 0.032                      | 198.6649  |
| 39   | 3      | 37     | 38    | 2       | 36      | E    | 0           | 205302.752   | 0.032                      | 198.6649  |
| 39   | 2      | 37     | 38    | 3       | 36      | E    | 0           | 205302.752   | 0.032                      | 198.6649  |
| 39   | 3      | 37     | 38    | 3       | 36      | E    | 0           | 205302.752   | 0.032                      | 198.6649  |
| 35   | 7      | 29     | 34    | 7       | 28      | E    | 0           | 205302.752   | 0.032                      | 189.8210  |
| 39   | 2      | 37     | 38    | 2       | 36      | A    | 0           | 205305.708   | -0.045                     | 198.6511  |
| 39   | 3      | 37     | 38    | 2       | 36      | A    | 0           | 205305.708   | -0.045                     | 198.6511  |
| 39   | 2      | 37     | 38    | 3       | 36      | A    | 0           | 205305.708   | -0.045                     | 198.6511  |
| 39   | 3      | 37     | 38    | 3       | 36      | A    | 0           | 205305.708   | -0.045                     | 198.6511  |
| 35   | 7      | 29     | 34    | 7       | 28      | A    | 0           | 205308.783   | -0.031                     | 189.8096  |
| 35   | 7      | 29     | 34    | 7       | 28      | E    | 1           | 205310.207   | 0.074                      | 306.1173  |
| 36   | 6      | 31     | 35    | 5       | 30      | A    | 0           | 205314.516   | -0.116                     | 192.7661  |
| 40   | 1      | 39     | 39    | 1       | 38      | A    | 1           | 205372.078   | -0.105                     | 316.4944  |
| 40   | 2      | 39     | 39    | 1       | 38      | A    | 1           | 205372.078   | -0.105                     | 316.4944  |
| 40   | 1      | 39     | 39    | 2       | 38      | A    | 1           | 205372.078   | -0.105                     | 316.4944  |
| 40   | 2      | 39     | 39    | 2       | 38      | A    | 1           | 205372.078   | -0.105                     | 316.4944  |
| 40   | 2      | 39     | 39    | 2       | 38      | E    | 1           | 205428.391   | -0.026                     | 316.0123  |
| 40   | 1      | 39     | 39    | 2       | 38      | E    | 1           | 205428.391   | -0.026                     | 316.0123  |
| 40   | 2      | 39     | 39    | 1       | 38      | E    | 1           | 205428.391   | -0.026                     | 316.0123  |
| 40   | 1      | 39     | 39    | 1       | 38      | E    | 1           | 205428.391   | -0.026                     | 316.0123  |
| 40   | 1      | 39     | 39    | 1       | 38      | E    | 0           | 205472.529   | -0.082                     | 199.7368  |
| 40   | 2      | 39     | 39    | 1       | 38      | E    | 0           | 205472.529   | -0.082                     | 199.7368  |
| 40   | 1      | 39     | 39    | 2       | 38      | E    | 0           | 205472.529   | -0.082                     | 199.7368  |
| 40   | 2      | 39     | 39    | 2       | 38      | E    | 0           | 205472.529   | -0.082                     | 199.7368  |

| $J'$ | $K'_a$ | $K'_c$ | $J''$ | $K''_a$ | $K''_c$ | Sym. | $v_{tCH_3}$ | $\nu_{Obs.}$ | $\nu_{Obs.} - \nu_{Calc.}$ | $E_{low}$ |
|------|--------|--------|-------|---------|---------|------|-------------|--------------|----------------------------|-----------|
| 40   | 1      | 39     | 39    | 1       | 38      | A    | 0           | 205474.323   | -0.006                     | 199.7217  |
| 40   | 2      | 39     | 39    | 1       | 38      | A    | 0           | 205474.323   | -0.006                     | 199.7217  |
| 40   | 1      | 39     | 39    | 2       | 38      | A    | 0           | 205474.323   | -0.006                     | 199.7217  |
| 40   | 2      | 39     | 39    | 2       | 38      | A    | 0           | 205474.323   | -0.006                     | 199.7217  |
| 36   | 18     | 18     | 36    | 17      | 19      | E    | 0           | 205490.009   | 0.122                      | 250.0858  |
| 20   | 8      | 12     | 19    | 7       | 12      | E    | 0           | 205507.040   | -0.069                     | 108.9376  |
| 18   | 9      | 10     | 17    | 8       | 9       | A    | 1           | 205527.839   | -0.013                     | 221.1470  |
| 18   | 9      | 9      | 17    | 8       | 10      | A    | 1           | 205532.710   | -0.030                     | 221.1468  |
| 41   | 0      | 41     | 40    | 0       | 40      | A    | 1           | 205587.421   | 0.028                      | 317.1918  |
| 41   | 1      | 41     | 40    | 0       | 40      | A    | 1           | 205587.421   | 0.028                      | 317.1918  |
| 41   | 0      | 41     | 40    | 1       | 40      | A    | 1           | 205587.421   | 0.028                      | 317.1918  |
| 41   | 1      | 41     | 40    | 1       | 40      | A    | 1           | 205587.421   | 0.028                      | 317.1918  |
| 41   | 1      | 41     | 40    | 1       | 40      | E    | 1           | 205602.982   | -0.035                     | 316.6595  |
| 41   | 0      | 41     | 40    | 1       | 40      | E    | 1           | 205602.982   | -0.035                     | 316.6595  |
| 41   | 1      | 41     | 40    | 0       | 40      | E    | 1           | 205602.982   | -0.035                     | 316.6595  |
| 41   | 0      | 41     | 40    | 0       | 40      | A    | 0           | 205657.367   | -0.240                     | 200.3803  |
| 41   | 1      | 41     | 40    | 0       | 40      | A    | 0           | 205657.367   | -0.240                     | 200.3803  |
| 41   | 0      | 41     | 40    | 1       | 40      | A    | 0           | 205657.367   | -0.240                     | 200.3803  |
| 41   | 1      | 41     | 40    | 1       | 40      | A    | 0           | 205657.367   | -0.240                     | 200.3803  |
| 41   | 0      | 41     | 40    | 0       | 40      | E    | 0           | 205657.367   | 0.235                      | 200.3969  |
| 41   | 1      | 41     | 40    | 0       | 40      | E    | 0           | 205657.367   | 0.235                      | 200.3969  |
| 41   | 0      | 41     | 40    | 1       | 40      | E    | 0           | 205657.367   | 0.235                      | 200.3969  |
| 41   | 1      | 41     | 40    | 1       | 40      | E    | 0           | 205657.367   | 0.235                      | 200.3969  |
| 35   | 30     | 5      | 34    | 30      | 4       | E    | 1           | 205708.129   | -0.621                     | 473.6377  |
| 35   | 30     | 5      | 34    | 30      | 4       | A    | 1           | 205713.310   | -0.284                     | 473.0127  |
| 35   | 30     | 6      | 34    | 30      | 5       | A    | 1           | 205713.310   | -0.284                     | 473.0127  |
| 35   | 29     | 6      | 34    | 29      | 5       | E    | 1           | 205769.498   | -0.158                     | 461.9074  |
| 35   | 29     | 6      | 34    | 29      | 5       | A    | 1           | 205777.029   | -0.200                     | 461.3000  |
| 35   | 29     | 7      | 34    | 29      | 6       | A    | 1           | 205777.029   | -0.200                     | 461.3000  |
| 35   | 29     | 7      | 34    | 29      | 6       | E    | 1           | 205782.938   | -0.153                     | 461.7586  |
| 35   | 6      | 29     | 34    | 6       | 28      | A    | 1           | 205828.998   | -0.022                     | 306.4172  |
| 35   | 30     | 5      | 34    | 30      | 4       | A    | 0           | 205836.492   | -0.322                     | 356.8692  |
| 35   | 30     | 6      | 34    | 30      | 5       | A    | 0           | 205836.492   | -0.322                     | 356.8692  |
| 35   | 28     | 8      | 34    | 28      | 7       | A    | 1           | 205846.867   | -0.029                     | 449.9906  |
| 35   | 28     | 7      | 34    | 28      | 6       | A    | 1           | 205846.867   | -0.029                     | 449.9906  |
| 35   | 29     | 6      | 34    | 29      | 5       | A    | 0           | 205899.157   | -0.239                     | 345.1743  |
| 35   | 29     | 7      | 34    | 29      | 6       | A    | 0           | 205899.157   | -0.239                     | 345.1743  |
| 35   | 27     | 9      | 34    | 27      | 8       | A    | 1           | 205923.561   | 0.031                      | 439.0846  |
| 35   | 27     | 8      | 34    | 27      | 7       | A    | 1           | 205923.561   | 0.031                      | 439.0846  |
| 35   | 27     | 8      | 34    | 27      | 7       | E    | 1           | 205925.275   | 0.169                      | 439.6323  |
| 35   | 28     | 7      | 34    | 28      | 6       | A    | 0           | 205967.694   | -0.117                     | 333.8774  |
| 35   | 28     | 8      | 34    | 28      | 7       | A    | 0           | 205967.694   | -0.117                     | 333.8774  |
| 35   | 28     | 8      | 34    | 28      | 7       | E    | 0           | 205967.694   | -0.429                     | 333.8591  |
| 35   | 26     | 10     | 34    | 26      | 9       | E    | 1           | 205991.348   | -0.079                     | 429.0888  |
| 35   | 26     | 9      | 34    | 26      | 8       | A    | 1           | 206008.411   | 0.164                      | 428.5827  |
| 35   | 26     | 10     | 34    | 26      | 9       | A    | 1           | 206008.411   | 0.164                      | 428.5827  |
| 34   | 10     | 25     | 33    | 10      | 24      | A    | 1           | 206037.682   | -0.033                     | 309.5836  |
| 35   | 27     | 8      | 34    | 27      | 7       | A    | 0           | 206042.899   | -0.086                     | 322.9788  |
| 35   | 27     | 9      | 34    | 27      | 8       | A    | 0           | 206042.899   | -0.086                     | 322.9788  |
| 35   | 27     | 8      | 34    | 27      | 8       | E    | 0           | 206042.899   | -0.022                     | 322.9616  |
| 34   | 10     | 25     | 33    | 10      | 24      | A    | 0           | 206095.239   | 0.124                      | 192.9815  |
| 35   | 25     | 10     | 34    | 25      | 9       | A    | 1           | 206102.430   | 0.025                      | 418.4851  |
| 35   | 6      | 29     | 34    | 6       | 28      | E    | 0           | 206112.682   | -0.096                     | 189.7485  |
| 35   | 6      | 29     | 34    | 6       | 28      | A    | 0           | 206123.005   | -0.034                     | 189.7367  |
| 35   | 26     | 9      | 34    | 26      | 8       | A    | 0           | 206126.014   | -0.021                     | 312.4789  |
| 35   | 26     | 10     | 34    | 26      | 9       | A    | 0           | 206126.014   | -0.021                     | 312.4789  |
| 35   | 26     | 10     | 34    | 26      | 9       | E    | 0           | 206126.014   | -0.050                     | 312.4606  |
| 35   | 6      | 29     | 34    | 6       | 28      | E    | 1           | 206147.529   | -0.085                     | 306.0418  |
| 34   | 9      | 26     | 33    | 9       | 25      | A    | 1           | 206171.954   | -0.005                     | 306.2043  |
| 35   | 24     | 12     | 34    | 24      | 11      | E    | 1           | 206184.091   | 0.134                      | 409.1956  |
| 35   | 24     | 11     | 34    | 24      | 10      | A    | 1           | 206207.696   | 0.042                      | 408.7923  |
| 35   | 24     | 12     | 34    | 24      | 11      | A    | 1           | 206207.696   | 0.042                      | 408.7923  |
| 35   | 25     | 10     | 34    | 25      | 9       | A    | 0           | 206218.406   | 0.096                      | 302.3781  |
| 35   | 25     | 11     | 34    | 25      | 10      | A    | 0           | 206218.406   | 0.096                      | 302.3781  |
| 34   | 9      | 26     | 33    | 9       | 25      | A    | 0           | 206282.187   | 0.029                      | 189.5651  |
| 34   | 9      | 26     | 33    | 9       | 25      | E    | 0           | 206284.271   | 0.004                      | 189.5749  |
| 35   | 23     | 13     | 34    | 23      | 12      | E    | 1           | 206298.881   | 0.144                      | 399.8480  |
| 35   | 23     | 12     | 34    | 23      | 11      | E    | 1           | 206311.986   | 0.081                      | 400.1378  |
| 35   | 24     | 11     | 34    | 24      | 10      | A    | 0           | 206321.579   | 0.125                      | 292.6769  |
| 35   | 24     | 12     | 34    | 24      | 11      | A    | 0           | 206321.579   | 0.125                      | 292.6769  |
| 35   | 24     | 12     | 34    | 24      | 11      | E    | 0           | 206321.579   | -0.145                     | 292.6573  |
| 35   | 23     | 13     | 34    | 23      | 12      | A    | 1           | 206326.196   | 0.163                      | 399.5047  |
| 35   | 23     | 12     | 34    | 23      | 11      | A    | 1           | 206326.196   | 0.163                      | 399.5047  |
| 30   | 11     | 20     | 30    | 9       | 21      | E    | 1           | 206395.608   | -0.211                     | 286.7892  |
| 35   | 22     | 14     | 34    | 22      | 13      | E    | 1           | 206429.256   | 0.159                      | 390.9014  |
| 35   | 23     | 12     | 34    | 23      | 11      | A    | 0           | 206437.694   | 0.201                      | 283.3759  |
| 35   | 23     | 13     | 34    | 23      | 12      | A    | 0           | 206437.694   | 0.201                      | 283.3759  |
| 35   | 23     | 13     | 34    | 23      | 12      | E    | 0           | 206437.694   | -0.224                     | 283.3560  |
| 35   | 22     | 13     | 34    | 22      | 12      | E    | 1           | 206440.339   | 0.208                      | 391.2558  |
| 35   | 22     | 13     | 34    | 22      | 12      | A    | 1           | 206460.254   | 0.183                      | 390.6229  |
| 35   | 22     | 14     | 34    | 22      | 13      | A    | 1           | 206460.254   | 0.183                      | 390.6229  |
| 35   | 21     | 15     | 34    | 21      | 14      | E    | 1           | 206578.238   | -0.007                     | 382.3573  |
| 35   | 21     | 14     | 34    | 21      | 13      | E    | 1           | 206586.355   | 0.111                      | 382.7712  |
| 34   | 10     | 24     | 33    | 10      | 23      | E    | 1           | 206589.708   | 0.122                      | 309.6217  |
| 18   | 9      | 10     | 17    | 8       | 10      | E    | 0           | 206598.793   | 0.004                      | 104.4453  |
| 20   | 5      | 15     | 19    | 4       | 16      | A    | 0           | 206600.789   | -0.046                     | 102.2106  |
| 35   | 21     | 15     | 34    | 21      | 14      | A    | 1           | 206613.125   | 0.169                      | 382.1474  |
| 35   | 21     | 14     | 34    | 21      | 13      | A    | 1           | 206613.125   | 0.169                      | 382.1474  |
| 18   | 9      | 9      | 17    | 8       | 9       | E    | 0           | 206638.421   | -0.253                     | 104.4611  |
| 18   | 9      | 10     | 17    | 8       | 9       | A    | 0           | 206667.353   | 0.168                      | 104.4428  |
| 18   | 9      | 9      | 17    | 8       | 10      | A    | 0           | 206671.361   | -0.412                     | 104.4426  |
| 34   | 10     | 25     | 33    | 10      | 24      | E    | 1           | 206671.361   | 0.287                      | 309.0998  |
| 35   | 21     | 14     | 34    | 21      | 13      | A    | 0           | 206719.173   | 0.187                      | 265.9776  |
| 35   | 21     | 15     | 34    | 21      | 14      | A    | 0           | 206719.173   | 0.187                      | 265.9776  |
| 35   | 20     | 16     | 34    | 20      | 15      | E    | 1           | 206750.330   | 0.057                      | 374.2174  |
| 35   | 20     | 15     | 34    | 20      | 14      | E    | 1           | 206754.264   | 0.114                      | 374.6848  |
| 35   | 20     | 15     | 34    | 20      | 14      | A    | 1           | 206788.858   | 0.107                      | 374.0791  |
| 35   | 20     | 16     | 34    | 20      | 15      | A    | 1           | 206788.858   | 0.107                      | 374.0791  |
| 35   | 20     | 15     | 34    | 20      | 14      | A    | 0           | 206891.669   | 0.023                      | 257.8822  |
| 35   | 20     | 16     | 34    | 20      | 15      | A    | 0           | 206891.669   | 0.023                      | 257.8822  |
| 35   | 20     | 16     | 34    | 20      | 15      | E    | 0           | 206892.923   | 0.218                      | 257.8632  |
| 35   | 19     | 16     | 34    | 19      | 15      | E    | 1           | 206948.898   | -0.001                     | 366.9979  |
| 35   | 19     | 17     | 34    | 19      | 16      | E    | 1           | 206950.566   | 0.096                      | 366.4837  |
| 35   | 19     | 17     | 34    | 19      | 16      | A    | 1           | 206992.857   | 0.145                      | 366.4190  |
| 35   | 19     | 16     | 34    | 19      | 15      | A    | 1           | 206992.857   | 0.145                      | 366.4190  |
| 34   | 9      | 26     | 33    | 9       | 25      | E    | 1           | 207019.374   | 0.141                      | 305.7979  |
| 16   | 10     | 6      | 15    | 9       | 6       | E    | 0           | 207045.190   | 0.391                      | 101.2781  |
| 16   | 10     | 7      | 15    | 9       | 6       | A    | 0           | 207083.370   | 0.299                      | 101.2608  |
| 16   | 10     | 6      | 15    | 9       | 7       | A    | 0           | 207083.370   | 0.299                      | 101.2608  |
| 35   | 19     | 16     | 34    | 19      | 15      | A    | 0           | 207092.135   | -0.013                     | 250.1912  |
| 35   | 19     | 17     | 34    | 19      | 16      | A    | 0           | 207092.135   | -0.013                     | 250.1912  |
| 35   | 19     | 17     | 34    | 19      | 16      | E    | 0           | 207093.682   | 0.189                      | 250.1731  |
| 16   | 10     | 7      | 15    | 9       | 7       | E    | 1           | 207109.734   | 0.344                      | 217.3818  |
| 35   | 18     | 17     | 34    | 18      | 16      | E    | 1           | 207177.340   | 0.218                      | 359.7119  |
| 35   | 18     | 18     | 34    | 18      | 17      | E    | 1           | 207185.924   | 0.118                      | 359.1586  |
| 35   | 18     | 17     | 34    | 18      | 16      | A    | 1           | 207232.013   | 0.244                      | 359.1685  |

| $J'$ | $K'_a$ | $K'_c$ | $J''$ | $K''_a$ | $K''_c$ | Sym. | $v_{tCH_3}$ | $\nu_{Obs.}$ | $\nu_{Obs.} - \nu_{Calc.}$ | $E_{low}$ |
|------|--------|--------|-------|---------|---------|------|-------------|--------------|----------------------------|-----------|
| 35   | 18     | 18     | 34    | 18      | 17      | A    | 1           | 207232.013   | 0.244                      | 359.1685  |
| 35   | 18     | 17     | 34    | 18      | 16      | A    | 0           | 207327.355   | -0.015                     | 242.9064  |
| 35   | 18     | 18     | 34    | 18      | 17      | A    | 0           | 207327.355   | -0.015                     | 242.9064  |
| 35   | 18     | 17     | 34    | 18      | 16      | E    | 0           | 207329.031   | 0.091                      | 242.9067  |
| 35   | 18     | 18     | 34    | 18      | 17      | E    | 0           | 207329.031   | 0.091                      | 242.8894  |
| 48   | 12     | 36     | 47    | 13      | 35      | A    | 1           | 207402.717   | 0.462                      | 436.5896  |
| 35   | 17     | 18     | 34    | 17      | 17      | E    | 1           | 207447.758   | 0.035                      | 352.8293  |
| 35   | 17     | 19     | 34    | 17      | 18      | E    | 1           | 207465.748   | 0.087                      | 352.2449  |
| 27   | 18     | 10     | 27    | 17      | 11      | E    | 0           | 207469.025   | -0.317                     | 193.1848  |
| 35   | 7      | 29     | 34    | 6       | 28      | E    | 0           | 207476.078   | -0.097                     | 189.7485  |
| 14   | 11     | 4      | 13    | 10      | 4       | E    | 1           | 207482.273   | -0.451                     | 215.4389  |
| 35   | 7      | 29     | 34    | 6       | 28      | A    | 0           | 207493.258   | -0.141                     | 189.7367  |
| 35   | 17     | 19     | 34    | 17      | 18      | A    | 1           | 207515.429   | 0.188                      | 352.3296  |
| 35   | 17     | 18     | 34    | 17      | 17      | A    | 1           | 207515.429   | 0.188                      | 352.3296  |
| 35   | 7      | 29     | 34    | 6       | 28      | E    | 1           | 207573.558   | -0.139                     | 306.0418  |
| 32   | 11     | 22     | 32    | 9       | 23      | A    | 1           | 207578.893   | -0.016                     | 299.8363  |
| 34   | 10     | 24     | 33    | 10      | 23      | E    | 0           | 207605.050   | -0.063                     | 193.0659  |
| 34   | 10     | 24     | 33    | 10      | 23      | A    | 0           | 207606.804   | -0.182                     | 193.0566  |
| 35   | 17     | 18     | 34    | 17      | 17      | A    | 0           | 207606.811   | 0.258                      | 236.0301  |
| 35   | 17     | 19     | 34    | 17      | 18      | A    | 0           | 207606.811   | 0.258                      | 236.0301  |
| 35   | 17     | 18     | 34    | 17      | 17      | E    | 0           | 207608.590   | 0.211                      | 236.0328  |
| 35   | 17     | 19     | 34    | 17      | 18      | E    | 0           | 207608.590   | 0.211                      | 236.0145  |
| 34   | 10     | 24     | 33    | 10      | 23      | A    | 1           | 207639.083   | -0.174                     | 309.6636  |
| 18   | 6      | 12     | 17    | 4       | 13      | E    | 1           | 207641.758   | 0.418                      | 212.2720  |
| 25   | 18     | 7      | 25    | 17      | 8       | E    | 0           | 207678.155   | 0.036                      | 182.7699  |
| 22   | 3      | 20     | 21    | 1       | 20      | E    | 0           | 207731.938   | -0.177                     | 104.6376  |
| 35   | 16     | 19     | 34    | 16      | 18      | E    | 1           | 207773.022   | 0.081                      | 346.3530  |
| 32   | 16     | 16     | 31    | 16      | 16      | E    | 1           | 207799.597   | 0.232                      | 326.1694  |
| 35   | 16     | 20     | 34    | 16      | 19      | E    | 1           | 207803.196   | 0.208                      | 345.7465  |
| 35   | 16     | 19     | 34    | 16      | 18      | A    | 1           | 207856.104   | 0.107                      | 345.9049  |
| 35   | 16     | 20     | 34    | 16      | 19      | A    | 1           | 207856.104   | 0.107                      | 345.9049  |
| 35   | 16     | 19     | 34    | 16      | 18      | A    | 0           | 207942.494   | 0.046                      | 229.5656  |
| 35   | 16     | 20     | 34    | 16      | 19      | A    | 0           | 207942.494   | 0.046                      | 229.5656  |
| 35   | 16     | 20     | 34    | 16      | 19      | E    | 0           | 207944.887   | -0.126                     | 229.5516  |
| 33   | 8      | 25     | 32    | 8       | 24      | A    | 1           | 207947.921   | -0.016                     | 297.1746  |
| 35   | 15     | 20     | 34    | 15      | 19      | E    | 1           | 208170.298   | 0.138                      | 340.2875  |
| 35   | 15     | 21     | 34    | 15      | 20      | E    | 1           | 208170.298   | 0.087                      | 339.6682  |
| 48   | 3      | 45     | 48    | 2       | 46      | E    | 0           | 208258.494   | -0.126                     | 274.5834  |
| 48   | 4      | 45     | 48    | 2       | 46      | E    | 0           | 208258.494   | -0.126                     | 274.5834  |
| 48   | 4      | 45     | 48    | 3       | 46      | E    | 0           | 208258.494   | -0.126                     | 274.5834  |
| 35   | 15     | 21     | 34    | 15      | 20      | A    | 1           | 208272.528   | 0.126                      | 339.8984  |
| 35   | 15     | 20     | 34    | 15      | 19      | A    | 1           | 208272.528   | 0.126                      | 339.8984  |
| 33   | 8      | 25     | 32    | 8       | 24      | A    | 1           | 208286.968   | -0.080                     | 297.5642  |
| 35   | 15     | 20     | 34    | 15      | 19      | A    | 0           | 208353.317   | 0.092                      | 223.5174  |
| 35   | 15     | 21     | 34    | 15      | 20      | A    | 0           | 208353.317   | 0.092                      | 223.5174  |
| 35   | 15     | 20     | 34    | 15      | 19      | E    | 0           | 208355.072   | 0.087                      | 223.5247  |
| 35   | 15     | 21     | 34    | 15      | 20      | E    | 0           | 208356.539   | 0.149                      | 223.5052  |
| 33   | 8      | 25     | 32    | 8       | 24      | A    | 0           | 208381.333   | 0.067                      | 180.8615  |
| 33   | 8      | 25     | 32    | 8       | 24      | E    | 0           | 208383.955   | 0.081                      | 180.8747  |
| 22   | 7      | 15     | 21    | 6       | 16      | E    | 1           | 208401.815   | -0.159                     | 114.6876  |
| 48   | 4      | 45     | 48    | 3       | 46      | E    | 1           | 208514.543   | 0.047                      | 390.8548  |
| 48   | 3      | 45     | 48    | 3       | 46      | E    | 1           | 208514.543   | 0.047                      | 390.8548  |
| 48   | 4      | 45     | 48    | 2       | 46      | E    | 1           | 208514.543   | 0.047                      | 390.8548  |
| 48   | 3      | 45     | 48    | 2       | 46      | E    | 1           | 208514.543   | 0.047                      | 390.8548  |
| 36   | 7      | 29     | 35    | 8       | 28      | A    | 0           | 208581.560   | 0.073                      | 200.1956  |
| 35   | 14     | 21     | 34    | 14      | 20      | E    | 1           | 208665.189   | 0.084                      | 334.6389  |
| 35   | 14     | 22     | 34    | 14      | 21      | E    | 1           | 208733.316   | 0.215                      | 334.0168  |
| 35   | 14     | 22     | 34    | 14      | 21      | A    | 1           | 208791.917   | 0.095                      | 334.3158  |
| 35   | 14     | 21     | 34    | 14      | 20      | A    | 1           | 208791.917   | 0.095                      | 334.3158  |
| 38   | 18     | 21     | 37    | 18      | 19      | E    | 1           | 208814.605   | -0.576                     | 381.0497  |
| 36   | 7      | 29     | 35    | 8       | 28      | A    | 1           | 208836.966   | -0.191                     | 316.8480  |
| 35   | 14     | 21     | 34    | 14      | 20      | A    | 0           | 208865.958   | 0.046                      | 217.8916  |
| 35   | 14     | 22     | 34    | 14      | 21      | A    | 0           | 208865.958   | 0.046                      | 217.8916  |
| 35   | 14     | 21     | 34    | 14      | 20      | E    | 0           | 208867.843   | 0.104                      | 217.9011  |
| 35   | 14     | 22     | 34    | 14      | 21      | E    | 0           | 208869.911   | 0.065                      | 217.8815  |
| 34   | 7      | 27     | 33    | 7       | 26      | A    | 1           | 209064.444   | 0.085                      | 302.4665  |
| 36   | 6      | 30     | 35    | 7       | 29      | A    | 1           | 209269.366   | -0.132                     | 313.3246  |
| 23   | 10     | 13     | 23    | 8       | 15      | E    | 1           | 209286.604   | 0.268                      | 245.5654  |
| 35   | 13     | 22     | 34    | 13      | 21      | E    | 1           | 209298.254   | 0.132                      | 329.4163  |
| 36   | 6      | 30     | 35    | 7       | 29      | E    | 1           | 209390.002   | 0.143                      | 312.9658  |
| 35   | 13     | 23     | 34    | 13      | 22      | E    | 1           | 209397.391   | 0.237                      | 328.8022  |
| 36   | 6      | 30     | 35    | 7       | 29      | E    | 0           | 209427.447   | -0.053                     | 196.6692  |
| 36   | 6      | 30     | 35    | 7       | 29      | A    | 0           | 209429.926   | -0.040                     | 196.6579  |
| 34   | 7      | 27     | 33    | 7       | 26      | E    | 0           | 209437.548   | -0.072                     | 185.7791  |
| 34   | 7      | 27     | 33    | 7       | 26      | A    | 0           | 209452.257   | -0.023                     | 185.7661  |
| 35   | 13     | 23     | 34    | 13      | 22      | A    | 1           | 209455.769   | 0.073                      | 329.1660  |
| 35   | 13     | 22     | 34    | 13      | 21      | A    | 1           | 209459.537   | 0.036                      | 329.1662  |
| 34   | 7      | 27     | 33    | 7       | 26      | E    | 1           | 209485.788   | -0.103                     | 302.0565  |
| 35   | 8      | 28     | 34    | 8       | 27      | A    | 1           | 209511.023   | -0.019                     | 309.8594  |
| 21   | 8      | 14     | 20    | 7       | 13      | A    | 1           | 209514.263   | 0.129                      | 229.6725  |
| 35   | 13     | 23     | 34    | 13      | 22      | A    | 0           | 209521.480   | 0.020                      | 212.6977  |
| 35   | 13     | 22     | 34    | 13      | 21      | A    | 0           | 209525.054   | 0.095                      | 212.6978  |
| 35   | 13     | 22     | 34    | 13      | 21      | E    | 0           | 209525.054   | -0.031                     | 212.7092  |
| 35   | 13     | 23     | 34    | 13      | 22      | E    | 0           | 209528.201   | 0.038                      | 212.6899  |
| 50   | 4      | 46     | 50    | 3       | 47      | E    | 0           | 209617.769   | 0.076                      | 299.0166  |
| 50   | 5      | 46     | 50    | 3       | 47      | E    | 0           | 209617.769   | 0.076                      | 299.0166  |
| 50   | 5      | 46     | 50    | 4       | 47      | E    | 0           | 209617.769   | 0.076                      | 299.0166  |
| 50   | 4      | 46     | 50    | 3       | 47      | A    | 0           | 209657.416   | 0.152                      | 299.0055  |
| 50   | 5      | 46     | 50    | 3       | 47      | A    | 0           | 209657.416   | 0.152                      | 299.0055  |
| 50   | 5      | 46     | 50    | 4       | 47      | A    | 0           | 209657.416   | 0.152                      | 299.0055  |
| 35   | 8      | 28     | 34    | 8       | 27      | E    | 0           | 209713.302   | -0.040                     | 193.2111  |
| 35   | 8      | 28     | 34    | 8       | 27      | A    | 0           | 209718.003   | -0.004                     | 193.2001  |
| 35   | 8      | 28     | 34    | 8       | 27      | E    | 1           | 209769.278   | 0.084                      | 309.4999  |
| 37   | 5      | 32     | 36    | 6       | 31      | A    | 1           | 209850.384   | -0.162                     | 316.2893  |
| 38   | 5      | 34     | 37    | 5       | 33      | A    | 1           | 209862.832   | -0.185                     | 318.7350  |
| 38   | 4      | 34     | 37    | 4       | 33      | A    | 1           | 209864.105   | -0.011                     | 318.7349  |
| 37   | 6      | 32     | 36    | 6       | 31      | A    | 1           | 209889.774   | -0.049                     | 316.2893  |
| 37   | 5      | 32     | 36    | 5       | 31      | A    | 1           | 209919.165   | -0.060                     | 316.2870  |
| 37   | 6      | 32     | 36    | 5       | 31      | A    | 1           | 209958.329   | -0.173                     | 316.2870  |
| 39   | 3      | 36     | 38    | 3       | 35      | A    | 1           | 209961.892   | -0.151                     | 320.7060  |
| 39   | 4      | 36     | 38    | 3       | 35      | A    | 1           | 209961.892   | -0.151                     | 320.7060  |
| 39   | 3      | 36     | 38    | 4       | 35      | A    | 1           | 209961.892   | -0.151                     | 320.7060  |
| 39   | 4      | 36     | 38    | 4       | 35      | A    | 1           | 209961.892   | -0.151                     | 320.7060  |
| 38   | 5      | 34     | 37    | 5       | 33      | E    | 1           | 210027.004   | -0.030                     | 318.3550  |
| 38   | 4      | 34     | 37    | 4       | 33      | E    | 1           | 210028.502   | 0.149                      | 318.3549  |
| 38   | 5      | 34     | 37    | 4       | 33      | E    | 1           | 210030.103   | 0.157                      | 318.3549  |
| 36   | 7      | 30     | 35    | 7       | 29      | A    | 1           | 210037.533   | -0.015                     | 313.3246  |
| 38   | 4      | 34     | 37    | 5       | 33      | E    | 0           | 210044.078   | -0.316                     | 202.0581  |
| 38   | 5      | 34     | 37    | 5       | 33      | E    | 0           | 210045.727   | -0.148                     | 202.0581  |
| 37   | 5      | 32     | 36    | 6       | 31      | E    | 1           | 210045.734   | -0.135                     | 315.9246  |
| 38   | 4      | 34     | 37    | 4       | 33      | E    | 0           | 210047.095   | -0.017                     | 202.0581  |
| 38   | 5      | 34     | 37    | 5       | 33      | A    | 0           | 210050.802   | -0.129                     | 202.0462  |
| 38   | 4      | 34     | 37    | 4       | 33      | A    | 0           | 210052.160   | -0.015                     | 202.0461  |
| 38   | 5      | 34     | 37    | 4       | 33      | A    | 0           | 210053.819   | 0.151                      | 202.0461  |
| 37   | 5      | 32     | 36    | 6       | 31      | E    | 0           | 210056.113   | -0.238                     | 199.6261  |
| 39   | 4      | 36     | 38    | 4       | 35      | E    | 1           | 210090.517   | 0.114                      | 320.3014  |

| $J'$ | $K'_a$ | $K'_c$ | $J''$ | $K''_a$ | $K''_c$ | Sym. | $v_{tCH_3}$ | $\nu_{Obs.}$ | $\nu_{Obs.} - \nu_{Calc.}$ | $E_{low}$ |
|------|--------|--------|-------|---------|---------|------|-------------|--------------|----------------------------|-----------|
| 39   | 3      | 36     | 38    | 4       | 35      | E    | 1           | 210090.517   | 0.114                      | 320.3014  |
| 39   | 4      | 36     | 38    | 3       | 35      | E    | 1           | 210090.517   | 0.114                      | 320.3014  |
| 39   | 3      | 36     | 38    | 3       | 35      | E    | 1           | 210090.517   | 0.114                      | 320.3014  |
| 37   | 6      | 32     | 36    | 6       | 31      | E    | 1           | 210092.641   | 0.120                      | 315.9246  |
| 37   | 6      | 32     | 36    | 6       | 31      | E    | 0           | 210100.245   | 0.046                      | 199.6261  |
| 37   | 6      | 32     | 36    | 6       | 31      | A    | 0           | 210106.453   | 0.014                      | 199.6146  |
| 39   | 3      | 36     | 38    | 3       | 35      | E    | 0           | 210118.400   | -0.115                     | 204.0094  |
| 39   | 4      | 36     | 38    | 3       | 35      | E    | 0           | 210118.400   | -0.115                     | 204.0094  |
| 39   | 3      | 36     | 38    | 4       | 35      | E    | 0           | 210118.400   | -0.115                     | 204.0094  |
| 39   | 4      | 36     | 38    | 4       | 35      | E    | 0           | 210118.400   | -0.115                     | 204.0094  |
| 39   | 3      | 36     | 38    | 3       | 35      | A    | 0           | 210122.374   | -0.088                     | 203.9967  |
| 39   | 4      | 36     | 38    | 3       | 35      | A    | 0           | 210122.374   | -0.088                     | 203.9967  |
| 39   | 3      | 36     | 38    | 4       | 35      | A    | 0           | 210122.374   | -0.088                     | 203.9967  |
| 39   | 4      | 36     | 38    | 4       | 35      | A    | 0           | 210122.374   | -0.088                     | 203.9967  |
| 37   | 5      | 32     | 36    | 5       | 31      | E    | 1           | 210127.300   | 0.534                      | 315.9219  |
| 40   | 2      | 38     | 39    | 2       | 37      | A    | 1           | 210127.308   | -0.252                     | 322.2354  |
| 40   | 3      | 38     | 39    | 2       | 37      | A    | 1           | 210127.308   | -0.252                     | 322.2354  |
| 40   | 2      | 38     | 39    | 3       | 37      | A    | 1           | 210127.308   | -0.252                     | 322.2354  |
| 40   | 3      | 38     | 39    | 3       | 37      | A    | 1           | 210127.308   | -0.252                     | 322.2354  |
| 37   | 5      | 32     | 36    | 5       | 31      | E    | 0           | 210132.584   | -0.092                     | 199.6235  |
| 37   | 5      | 32     | 36    | 5       | 31      | A    | 0           | 210138.890   | -0.216                     | 199.6121  |
| 37   | 6      | 32     | 36    | 5       | 31      | E    | 1           | 210173.448   | 0.031                      | 315.9219  |
| 37   | 6      | 32     | 36    | 5       | 31      | E    | 0           | 210176.551   | 0.028                      | 199.6235  |
| 40   | 3      | 38     | 39    | 3       | 37      | E    | 1           | 210220.587   | -0.099                     | 321.7974  |
| 40   | 2      | 38     | 39    | 3       | 37      | E    | 1           | 210220.587   | -0.099                     | 321.7974  |
| 40   | 3      | 38     | 39    | 2       | 37      | E    | 1           | 210220.587   | -0.099                     | 321.7974  |
| 40   | 2      | 38     | 39    | 2       | 37      | E    | 1           | 210220.587   | -0.099                     | 321.7974  |
| 40   | 2      | 38     | 39    | 2       | 37      | E    | 0           | 210257.459   | 0.004                      | 205.5130  |
| 40   | 3      | 38     | 39    | 2       | 37      | E    | 0           | 210257.459   | 0.004                      | 205.5130  |
| 40   | 2      | 38     | 39    | 3       | 37      | E    | 0           | 210257.459   | 0.004                      | 205.5130  |
| 40   | 3      | 38     | 39    | 3       | 37      | E    | 0           | 210257.459   | 0.004                      | 205.5130  |
| 40   | 2      | 38     | 39    | 2       | 37      | A    | 0           | 210260.342   | 0.033                      | 205.4993  |
| 40   | 3      | 38     | 39    | 2       | 37      | A    | 0           | 210260.342   | 0.033                      | 205.4993  |
| 40   | 2      | 38     | 39    | 3       | 37      | A    | 0           | 210260.342   | 0.033                      | 205.4993  |
| 40   | 3      | 38     | 39    | 3       | 37      | A    | 0           | 210260.342   | 0.033                      | 205.4993  |
| 36   | 7      | 30     | 35    | 7       | 29      | E    | 0           | 210268.921   | 0.031                      | 196.6692  |
| 36   | 7      | 30     | 35    | 7       | 29      | E    | 1           | 210273.783   | -0.022                     | 312.9658  |
| 36   | 7      | 30     | 35    | 7       | 29      | E    | 0           | 210275.942   | 0.052                      | 196.6579  |
| 35   | 12     | 24     | 34    | 12      | 23      | A    | 1           | 210284.707   | 0.254                      | 324.0397  |
| 35   | 12     | 24     | 34    | 12      | 23      | A    | 1           | 210322.861   | 0.073                      | 324.4626  |
| 41   | 1      | 40     | 40    | 1       | 39      | A    | 1           | 210326.597   | -0.061                     | 323.3449  |
| 41   | 2      | 40     | 40    | 1       | 39      | A    | 1           | 210326.597   | -0.061                     | 323.3449  |
| 41   | 1      | 40     | 40    | 2       | 39      | A    | 1           | 210326.597   | -0.061                     | 323.3449  |
| 41   | 2      | 40     | 40    | 2       | 39      | A    | 1           | 210326.597   | -0.061                     | 323.3449  |
| 35   | 12     | 23     | 34    | 12      | 22      | A    | 1           | 210367.396   | -0.079                     | 324.4641  |
| 35   | 12     | 24     | 34    | 12      | 23      | A    | 0           | 210378.467   | 0.039                      | 207.9495  |
| 41   | 2      | 40     | 40    | 2       | 39      | E    | 1           | 210382.587   | -0.128                     | 322.8647  |
| 41   | 1      | 40     | 40    | 2       | 39      | E    | 1           | 210382.587   | -0.128                     | 322.8647  |
| 41   | 2      | 40     | 40    | 1       | 39      | E    | 1           | 210382.587   | -0.128                     | 322.8647  |
| 41   | 1      | 40     | 40    | 1       | 39      | E    | 1           | 210382.587   | -0.128                     | 322.8647  |
| 35   | 12     | 23     | 34    | 12      | 22      | E    | 0           | 210403.305   | 0.063                      | 207.9637  |
| 35   | 12     | 24     | 34    | 12      | 23      | E    | 0           | 210403.305   | 0.063                      | 207.9449  |
| 35   | 12     | 23     | 34    | 12      | 22      | A    | 0           | 210419.842   | 0.097                      | 207.9510  |
| 41   | 1      | 40     | 40    | 1       | 39      | E    | 0           | 210428.392   | -0.040                     | 206.5906  |
| 41   | 2      | 40     | 40    | 1       | 39      | E    | 0           | 210428.392   | -0.040                     | 206.5906  |
| 41   | 1      | 40     | 40    | 2       | 39      | E    | 0           | 210428.392   | -0.040                     | 206.5906  |
| 41   | 2      | 40     | 40    | 2       | 39      | E    | 0           | 210428.392   | -0.040                     | 206.5906  |
| 41   | 1      | 40     | 40    | 1       | 39      | A    | 0           | 210430.201   | 0.057                      | 206.5756  |
| 41   | 2      | 40     | 40    | 1       | 39      | A    | 0           | 210430.201   | 0.057                      | 206.5756  |
| 41   | 1      | 40     | 40    | 2       | 39      | A    | 0           | 210430.201   | 0.057                      | 206.5756  |
| 41   | 2      | 40     | 40    | 2       | 39      | A    | 0           | 210430.201   | 0.057                      | 206.5756  |
| 36   | 6      | 30     | 35    | 6       | 29      | A    | 1           | 210519.987   | 0.082                      | 313.2829  |
| 42   | 0      | 42     | 41    | 0       | 41      | A    | 1           | 210542.126   | -0.113                     | 324.0495  |
| 42   | 1      | 42     | 41    | 0       | 41      | A    | 1           | 210542.126   | -0.113                     | 324.0495  |
| 42   | 0      | 42     | 41    | 1       | 41      | A    | 1           | 210542.126   | -0.113                     | 324.0495  |
| 42   | 1      | 42     | 41    | 1       | 41      | A    | 1           | 210542.126   | -0.113                     | 324.0495  |
| 42   | 1      | 42     | 41    | 1       | 41      | E    | 1           | 210557.597   | -0.136                     | 323.5177  |
| 42   | 1      | 42     | 41    | 0       | 41      | E    | 1           | 210557.597   | -0.136                     | 323.5177  |
| 42   | 0      | 42     | 41    | 0       | 41      | E    | 1           | 210557.597   | -0.136                     | 323.5177  |
| 42   | 0      | 42     | 41    | 0       | 41      | A    | 0           | 210613.540   | -0.231                     | 207.2403  |
| 42   | 1      | 42     | 41    | 0       | 41      | A    | 0           | 210613.540   | -0.231                     | 207.2403  |
| 42   | 0      | 42     | 41    | 1       | 41      | A    | 0           | 210613.540   | -0.231                     | 207.2403  |
| 42   | 1      | 42     | 41    | 1       | 41      | A    | 0           | 210613.540   | -0.231                     | 207.2403  |
| 42   | 0      | 42     | 41    | 0       | 41      | E    | 0           | 210613.540   | 0.240                      | 207.2569  |
| 42   | 1      | 42     | 41    | 0       | 41      | E    | 0           | 210613.540   | 0.240                      | 207.2569  |
| 42   | 0      | 42     | 41    | 1       | 41      | E    | 0           | 210613.540   | 0.240                      | 207.2569  |
| 42   | 1      | 42     | 41    | 1       | 41      | E    | 0           | 210613.540   | 0.240                      | 207.2569  |
| 20   | 5      | 15     | 19    | 3       | 16      | E    | 1           | 210688.409   | 0.674                      | 218.3999  |
| 36   | 6      | 30     | 35    | 6       | 29      | E    | 0           | 210790.897   | 0.001                      | 196.6237  |
| 36   | 6      | 30     | 35    | 6       | 29      | A    | 0           | 210800.200   | -0.125                     | 196.6122  |
| 21   | 8      | 13     | 20    | 7       | 13      | E    | 0           | 210816.279   | 0.077                      | 112.9513  |
| 36   | 6      | 30     | 35    | 6       | 29      | E    | 1           | 210816.279   | 0.337                      | 312.9182  |
| 40   | 9      | 31     | 39    | 10      | 30      | E    | 0           | 210884.002   | -0.568                     | 237.3619  |
| 34   | 9      | 25     | 33    | 9       | 24      | E    | 1           | 211087.324   | 0.232                      | 306.4050  |
| 19   | 9      | 11     | 18    | 8       | 10      | A    | 1           | 211257.593   | 0.459                      | 224.7174  |
| 19   | 9      | 10     | 18    | 8       | 11      | A    | 1           | 211269.992   | 0.326                      | 224.7170  |
| 35   | 11     | 24     | 34    | 11      | 23      | E    | 1           | 211329.047   | 0.081                      | 320.3153  |
| 35   | 11     | 25     | 34    | 11      | 24      | A    | 1           | 211408.587   | 0.007                      | 320.2239  |
| 35   | 11     | 25     | 34    | 11      | 24      | A    | 0           | 211457.218   | 0.129                      | 203.6663  |
| 21   | 8      | 13     | 20    | 7       | 14      | A    | 0           | 211490.927   | -0.257                     | 112.9121  |
| 35   | 11     | 25     | 34    | 11      | 24      | E    | 0           | 211506.281   | 0.030                      | 203.6686  |
| 35   | 11     | 25     | 34    | 11      | 24      | E    | 1           | 211545.017   | 0.192                      | 319.7550  |
| 36   | 31     | 6      | 35    | 31      | 5       | A    | 1           | 211572.657   | -0.237                     | 491.9879  |
| 36   | 31     | 5      | 35    | 31      | 4       | A    | 1           | 211572.657   | -0.237                     | 491.9879  |
| 36   | 31     | 6      | 35    | 31      | 5       | E    | 1           | 211581.273   | 0.011                      | 492.3332  |
| 36   | 7      | 30     | 35    | 6       | 29      | E    | 0           | 211632.347   | 0.060                      | 196.6237  |
| 36   | 30     | 6      | 35    | 30      | 5       | A    | 1           | 211635.894   | -0.125                     | 479.8745  |
| 36   | 30     | 7      | 35    | 30      | 6       | A    | 1           | 211635.894   | -0.125                     | 479.8745  |
| 36   | 7      | 30     | 35    | 6       | 29      | A    | 0           | 211646.301   | 0.051                      | 196.6122  |
| 36   | 7      | 30     | 35    | 6       | 29      | E    | 1           | 211699.942   | 0.054                      | 312.9182  |
| 36   | 29     | 8      | 35    | 29      | 7       | A    | 1           | 211704.648   | -0.223                     | 468.1640  |
| 36   | 29     | 7      | 35    | 29      | 6       | A    | 1           | 211704.648   | -0.223                     | 468.1640  |
| 47   | 3      | 45     | 47    | 2       | 46      | E    | 1           | 211737.140   | -0.150                     | 375.4582  |
| 47   | 2      | 45     | 47    | 2       | 46      | E    | 1           | 211737.140   | -0.150                     | 375.4582  |
| 47   | 3      | 45     | 47    | 1       | 46      | E    | 1           | 211737.140   | -0.150                     | 375.4582  |
| 47   | 2      | 45     | 47    | 1       | 46      | E    | 1           | 211737.140   | -0.150                     | 375.4582  |
| 36   | 30     | 6      | 35    | 30      | 5       | A    | 0           | 211762.241   | -0.340                     | 363.7352  |
| 36   | 30     | 7      | 35    | 30      | 6       | A    | 0           | 211762.241   | -0.340                     | 363.7352  |
| 36   | 28     | 8      | 35    | 28      | 7       | A    | 1           | 211780.295   | -0.007                     | 456.8569  |
| 36   | 28     | 9      | 35    | 28      | 8       | A    | 1           | 211780.295   | -0.007                     | 456.8569  |
| 35   | 11     | 24     | 34    | 11      | 23      | E    | 0           | 211791.701   | 0.034                      | 203.6923  |
| 35   | 11     | 24     | 34    | 11      | 23      | A    | 1           | 211808.493   | 0.043                      | 320.2408  |
| 35   | 11     | 24     | 34    | 11      | 23      | A    | 0           | 211830.104   | -0.094                     | 203.6820  |
| 36   | 29     | 8      | 35    | 29      | 7       | A    | 0           | 211830.104   | -0.094                     | 352.0424  |
| 36   | 27     | 10     | 35    | 27      | 9       | E    | 1           | 211847.731   | -0.070                     | 446.5005  |
| 36   | 27     | 10     | 35    | 27      | 9       | A    | 1           | 211863.361   | 0.032                      | 445.9535  |

| $J'$ | $K'_a$ | $K'_c$ | $J''$ | $K''_a$ | $K''_c$ | Sym. | $v_{tCH_3}$ | $\nu_{Obs.}$ | $\nu_{Obs.} - \nu_{Calc.}$ | $E_{low}$ |
|------|--------|--------|-------|---------|---------|------|-------------|--------------|----------------------------|-----------|
| 36   | 27     | 9      | 35    | 27      | 8       | A    | 1           | 211863.361   | 0.032                      | 445.9535  |
| 36   | 27     | 9      | 35    | 27      | 9       | E    | 1           | 211883.728   | -0.190                     | 446.5005  |
| 36   | 28     | 8      | 35    | 28      | 7       | A    | 0           | 211904.209   | -0.125                     | 340.7478  |
| 36   | 28     | 9      | 35    | 28      | 8       | A    | 0           | 211904.209   | -0.125                     | 340.7478  |
| 36   | 26     | 11     | 35    | 26      | 10      | E    | 1           | 211936.196   | 0.001                      | 435.9599  |
| 36   | 26     | 10     | 35    | 26      | 9       | A    | 1           | 211955.342   | 0.166                      | 435.4544  |
| 36   | 26     | 11     | 35    | 26      | 10      | A    | 1           | 211955.342   | 0.166                      | 435.4544  |
| 36   | 27     | 9      | 35    | 27      | 8       | A    | 0           | 211985.764   | -0.010                     | 329.8517  |
| 36   | 27     | 10     | 35    | 27      | 9       | A    | 0           | 211985.764   | -0.010                     | 329.8517  |
| 36   | 27     | 10     | 35    | 27      | 9       | E    | 0           | 211985.764   | 0.030                      | 329.8344  |
| 36   | 25     | 12     | 35    | 25      | 11      | E    | 1           | 212034.921   | 0.175                      | 425.8171  |
| 36   | 25     | 11     | 35    | 25      | 10      | E    | 1           | 212051.051   | 0.055                      | 425.9668  |
| 36   | 25     | 11     | 35    | 25      | 10      | A    | 1           | 212057.403   | 0.080                      | 425.3599  |
| 36   | 25     | 12     | 35    | 25      | 11      | A    | 1           | 212057.403   | 0.080                      | 425.3599  |
| 36   | 26     | 10     | 35    | 26      | 9       | A    | 0           | 212075.830   | 0.016                      | 319.3546  |
| 36   | 26     | 11     | 35    | 26      | 10      | A    | 0           | 212075.830   | 0.016                      | 319.3546  |
| 36   | 26     | 11     | 35    | 26      | 10      | E    | 0           | 212075.830   | -0.045                     | 319.3362  |
| 35   | 9      | 27     | 34    | 9       | 26      | A    | 1           | 212092.311   | -0.025                     | 313.0815  |
| 36   | 24     | 13     | 35    | 24      | 12      | E    | 1           | 212145.287   | 0.007                      | 416.0731  |
| 36   | 24     | 12     | 35    | 24      | 11      | E    | 1           | 212160.866   | 0.233                      | 416.2947  |
| 36   | 24     | 12     | 35    | 24      | 11      | A    | 1           | 212171.740   | 0.164                      | 415.6706  |
| 36   | 24     | 13     | 35    | 24      | 12      | A    | 1           | 212171.740   | 0.164                      | 415.6706  |
| 36   | 25     | 11     | 35    | 25      | 10      | A    | 0           | 212176.008   | 0.083                      | 309.2568  |
| 36   | 25     | 12     | 35    | 25      | 11      | A    | 0           | 212176.008   | 0.083                      | 309.2568  |
| 36   | 25     | 12     | 35    | 25      | 11      | E    | 0           | 212176.008   | -0.099                     | 309.2377  |
| 35   | 9      | 27     | 34    | 9       | 26      | A    | 0           | 212224.336   | 0.388                      | 196.4459  |
| 35   | 9      | 27     | 34    | 9       | 26      | E    | 0           | 212224.336   | -0.194                     | 196.4558  |
| 19   | 9      | 11     | 18    | 8       | 11      | E    | 1           | 212252.719   | 0.527                      | 224.1334  |
| 34   | 9      | 25     | 33    | 9       | 24      | A    | 0           | 212267.023   | 0.056                      | 190.0077  |
| 36   | 23     | 14     | 35    | 23      | 13      | E    | 1           | 212270.097   | 0.054                      | 406.7293  |
| 34   | 9      | 25     | 33    | 9       | 24      | E    | 0           | 212278.198   | 0.058                      | 190.0190  |
| 36   | 23     | 13     | 35    | 23      | 12      | E    | 1           | 212283.817   | 0.014                      | 407.0196  |
| 36   | 24     | 12     | 35    | 24      | 11      | A    | 0           | 212288.080   | 0.174                      | 299.5591  |
| 36   | 24     | 13     | 35    | 24      | 12      | A    | 0           | 212288.080   | 0.174                      | 299.5591  |
| 36   | 24     | 13     | 35    | 24      | 12      | E    | 0           | 212288.080   | -0.152                     | 299.5394  |
| 36   | 23     | 14     | 35    | 23      | 13      | A    | 1           | 212300.353   | 0.190                      | 406.3870  |
| 36   | 23     | 13     | 35    | 23      | 12      | A    | 1           | 212300.353   | 0.190                      | 406.3870  |
| 21   | 8      | 13     | 20    | 7       | 13      | E    | 1           | 212322.032   | 0.691                      | 229.4856  |
| 19   | 9      | 11     | 18    | 8       | 11      | E    | 0           | 212336.321   | 0.092                      | 108.0171  |
| 34   | 9      | 25     | 33    | 9       | 24      | A    | 1           | 212341.534   | -0.019                     | 306.6680  |
| 35   | 10     | 26     | 34    | 10      | 25      | A    | 1           | 212370.829   | -0.006                     | 316.4563  |
| 19   | 9      | 10     | 18    | 8       | 10      | E    | 0           | 212376.559   | 0.028                      | 108.0328  |
| 19   | 9      | 11     | 18    | 8       | 10      | A    | 0           | 212401.303   | -0.023                     | 108.0146  |
| 36   | 23     | 13     | 35    | 23      | 12      | A    | 0           | 212414.277   | 0.304                      | 290.2619  |
| 36   | 23     | 14     | 35    | 23      | 13      | A    | 0           | 212414.277   | 0.304                      | 290.2619  |
| 36   | 23     | 14     | 35    | 23      | 13      | E    | 0           | 212414.277   | -0.190                     | 290.2420  |
| 36   | 22     | 14     | 35    | 22      | 13      | E    | 1           | 212423.343   | 0.169                      | 398.1419  |
| 35   | 10     | 26     | 34    | 10      | 25      | A    | 0           | 212437.189   | 0.115                      | 199.8561  |
| 35   | 10     | 26     | 34    | 10      | 25      | E    | 0           | 212447.022   | 0.080                      | 199.8639  |
| 36   | 21     | 16     | 35    | 21      | 15      | E    | 1           | 212574.267   | 0.111                      | 389.2480  |
| 36   | 21     | 15     | 35    | 21      | 14      | E    | 1           | 212582.284   | 0.173                      | 389.6622  |
| 36   | 21     | 16     | 35    | 21      | 15      | A    | 1           | 212612.331   | 0.176                      | 389.0393  |
| 36   | 21     | 15     | 35    | 21      | 14      | A    | 1           | 212612.331   | 0.176                      | 389.0393  |
| 36   | 21     | 15     | 35    | 21      | 14      | A    | 0           | 212720.058   | -0.061                     | 272.8730  |
| 36   | 21     | 16     | 35    | 21      | 15      | A    | 0           | 212720.058   | -0.061                     | 272.8730  |
| 36   | 21     | 16     | 35    | 21      | 15      | E    | 0           | 212721.457   | 0.420                      | 272.8534  |
| 35   | 9      | 27     | 34    | 9       | 26      | E    | 1           | 212729.034   | 0.109                      | 312.7033  |
| 36   | 20     | 17     | 35    | 20      | 16      | E    | 1           | 212761.635   | 0.119                      | 381.1138  |
| 36   | 20     | 16     | 35    | 20      | 15      | E    | 1           | 212765.082   | 0.176                      | 381.5814  |
| 36   | 20     | 17     | 35    | 20      | 16      | A    | 1           | 212803.754   | 0.236                      | 380.9768  |
| 36   | 20     | 16     | 35    | 20      | 15      | A    | 1           | 212803.754   | 0.236                      | 380.9768  |
| 17   | 10     | 8      | 16    | 9       | 8       | E    | 0           | 212846.719   | 0.286                      | 104.4180  |
| 17   | 10     | 7      | 16    | 9       | 7       | E    | 0           | 212878.604   | 0.246                      | 104.4352  |
| 36   | 20     | 16     | 35    | 20      | 15      | A    | 0           | 212908.071   | -0.035                     | 264.7834  |
| 36   | 20     | 17     | 35    | 20      | 16      | A    | 0           | 212908.071   | -0.035                     | 264.7834  |
| 36   | 20     | 17     | 35    | 20      | 16      | E    | 0           | 212909.505   | 0.215                      | 264.7644  |
| 17   | 10     | 8      | 16    | 9       | 7       | A    | 0           | 212916.812   | 0.259                      | 104.4178  |
| 17   | 10     | 7      | 16    | 9       | 8       | A    | 0           | 212916.812   | 0.259                      | 104.4178  |
| 17   | 10     | 8      | 16    | 9       | 8       | E    | 1           | 212936.597   | -0.225                     | 220.5371  |
| 36   | 19     | 17     | 35    | 19      | 16      | E    | 1           | 212977.021   | -0.093                     | 373.9009  |
| 36   | 19     | 18     | 35    | 19      | 17      | A    | 1           | 213026.012   | 0.274                      | 373.3236  |
| 36   | 19     | 17     | 35    | 19      | 16      | A    | 1           | 213026.012   | 0.274                      | 373.3236  |
| 49   | 3      | 46     | 49    | 2       | 47      | E    | 0           | 213050.050   | -0.384                     | 283.0842  |
| 49   | 4      | 46     | 49    | 2       | 47      | E    | 0           | 213050.050   | -0.384                     | 283.0842  |
| 49   | 4      | 46     | 49    | 3       | 47      | E    | 0           | 213050.050   | -0.384                     | 283.0842  |
| 36   | 19     | 17     | 35    | 19      | 16      | A    | 0           | 213126.585   | -0.016                     | 257.0991  |
| 36   | 19     | 18     | 35    | 19      | 17      | A    | 0           | 213126.585   | -0.016                     | 257.0991  |
| 36   | 19     | 18     | 35    | 19      | 17      | E    | 0           | 213128.208   | 0.114                      | 257.0810  |
| 36   | 18     | 18     | 35    | 18      | 17      | E    | 1           | 213226.222   | 0.162                      | 366.6226  |
| 35   | 10     | 26     | 34    | 10      | 25      | E    | 1           | 213231.164   | 0.148                      | 315.9936  |
| 36   | 18     | 19     | 35    | 18      | 18      | E    | 1           | 213236.605   | 0.100                      | 366.0695  |
| 36   | 18     | 18     | 35    | 18      | 17      | A    | 1           | 213286.703   | 0.235                      | 366.0810  |
| 36   | 18     | 19     | 35    | 18      | 18      | A    | 1           | 213286.703   | 0.235                      | 366.0810  |
| 49   | 4      | 46     | 49    | 3       | 47      | E    | 1           | 213311.675   | 0.056                      | 399.3539  |
| 49   | 3      | 46     | 49    | 3       | 47      | E    | 1           | 213311.675   | 0.056                      | 399.3539  |
| 49   | 4      | 46     | 49    | 2       | 47      | E    | 1           | 213311.675   | 0.056                      | 399.3539  |
| 49   | 3      | 46     | 49    | 2       | 47      | E    | 1           | 213311.675   | 0.056                      | 399.3539  |
| 35   | 7      | 28     | 34    | 7       | 27      | A    | 1           | 213337.614   | 0.127                      | 309.4402  |
| 15   | 11     | 5      | 14    | 10      | 5       | E    | 1           | 213345.753   | 0.222                      | 218.1902  |
| 36   | 18     | 18     | 35    | 18      | 17      | A    | 0           | 213383.313   | 0.120                      | 249.8221  |
| 36   | 18     | 19     | 35    | 18      | 18      | A    | 0           | 213383.313   | 0.120                      | 249.8221  |
| 36   | 18     | 18     | 35    | 18      | 17      | E    | 0           | 213385.080   | 0.163                      | 249.8224  |
| 36   | 18     | 19     | 35    | 18      | 18      | E    | 0           | 213385.080   | 0.163                      | 249.8051  |
| 35   | 10     | 25     | 34    | 10      | 24      | E    | 1           | 213489.361   | 0.208                      | 316.5128  |
| 36   | 17     | 19     | 35    | 17      | 18      | E    | 1           | 213521.803   | 0.195                      | 359.7490  |
| 36   | 17     | 20     | 35    | 17      | 19      | E    | 1           | 213542.369   | 0.143                      | 359.1652  |
| 36   | 17     | 20     | 35    | 17      | 19      | A    | 1           | 213596.217   | 0.174                      | 359.2515  |
| 36   | 17     | 19     | 35    | 17      | 18      | A    | 1           | 213596.217   | 0.174                      | 359.2515  |
| 36   | 17     | 19     | 35    | 17      | 18      | A    | 0           | 213688.122   | -0.010                     | 242.9551  |
| 36   | 17     | 20     | 35    | 17      | 19      | A    | 0           | 213688.122   | -0.010                     | 242.9551  |
| 36   | 17     | 19     | 35    | 17      | 18      | E    | 0           | 213690.140   | 0.008                      | 242.9579  |
| 36   | 17     | 20     | 35    | 17      | 19      | E    | 0           | 213690.140   | 0.008                      | 242.9396  |
| 35   | 7      | 28     | 34    | 7       | 27      | E    | 0           | 213723.768   | 0.029                      | 192.7652  |
| 35   | 7      | 28     | 34    | 7       | 27      | A    | 0           | 213739.330   | 0.019                      | 192.7526  |
| 35   | 7      | 28     | 34    | 7       | 27      | E    | 1           | 213795.832   | -0.177                     | 309.0442  |
| 46   | 19     | 27     | 46    | 18      | 28      | A    | 0           | 213800.618   | 0.335                      | 339.3214  |
| 46   | 19     | 28     | 46    | 18      | 29      | A    | 0           | 213800.618   | 0.335                      | 339.3214  |
| 36   | 16     | 20     | 35    | 16      | 19      | E    | 1           | 213877.570   | 0.175                      | 353.2836  |
| 36   | 16     | 21     | 35    | 16      | 20      | E    | 1           | 213911.399   | 0.065                      | 352.6780  |
| 16   | 2      | 14     | 15    | 1       | 15      | E    | 1           | 213948.619   | 0.577                      | 198.9274  |
| 36   | 16     | 21     | 35    | 16      | 20      | A    | 1           | 213969.060   | 0.246                      | 352.8382  |
| 36   | 16     | 20     | 35    | 16      | 19      | A    | 1           | 213969.060   | 0.246                      | 352.8382  |
| 36   | 16     | 20     | 35    | 16      | 19      | A    | 0           | 214055.727   | 0.099                      | 236.5018  |
| 36   | 16     | 21     | 35    | 16      | 20      | A    | 0           | 214055.727   | 0.099                      | 236.5018  |
| 36   | 16     | 21     | 35    | 16      | 20      | E    | 0           | 214058.570   | 0.118                      | 236.4879  |
| 36   | 15     | 21     | 35    | 15      | 20      | E    | 1           | 214313.028   | 0.102                      | 347.2313  |

| $J'$ | $K'_a$ | $K'_c$ | $J''$ | $K''_a$ | $K''_c$ | Sym. | $v_{tCH_3}$ | $\nu_{Obs.}$ | $\nu_{Obs.} - \nu_{Calc.}$ | $E_{low}$ |
|------|--------|--------|-------|---------|---------|------|-------------|--------------|----------------------------|-----------|
| 36   | 15     | 22     | 35    | 15      | 21      | E    | 1           | 214364.739   | 0.143                      | 346.6135  |
| 34   | 8      | 26     | 33    | 8       | 25      | E    | 1           | 214368.350   | -0.055                     | 304.1110  |
| 36   | 15     | 22     | 35    | 15      | 21      | A    | 1           | 214425.595   | 0.180                      | 346.8456  |
| 36   | 15     | 21     | 35    | 15      | 20      | A    | 1           | 214425.595   | 0.180                      | 346.8456  |
| 34   | 8      | 26     | 33    | 8       | 25      | A    | 1           | 214490.172   | -0.004                     | 304.5119  |
| 36   | 15     | 21     | 35    | 15      | 20      | A    | 0           | 214506.174   | 0.086                      | 230.4673  |
| 36   | 15     | 22     | 35    | 15      | 21      | A    | 0           | 214506.174   | 0.086                      | 230.4673  |
| 36   | 15     | 21     | 35    | 15      | 20      | E    | 0           | 214508.063   | 0.069                      | 230.4746  |
| 37   | 6      | 31     | 36    | 7       | 30      | A    | 1           | 214509.747   | -0.029                     | 320.3307  |
| 36   | 15     | 22     | 35    | 15      | 21      | E    | 0           | 214509.754   | 0.183                      | 230.4552  |
| 34   | 8      | 26     | 33    | 8       | 25      | E    | 0           | 214658.294   | -0.050                     | 187.8256  |
| 34   | 8      | 26     | 33    | 8       | 25      | A    | 0           | 214659.875   | 0.149                      | 187.8124  |
| 37   | 6      | 31     | 36    | 7       | 30      | E    | 1           | 214671.864   | 0.148                      | 319.9797  |
| 37   | 6      | 31     | 36    | 7       | 30      | E    | 0           | 214697.706   | 0.013                      | 203.6830  |
| 37   | 6      | 31     | 36    | 7       | 30      | A    | 0           | 214702.007   | 0.077                      | 203.6720  |
| 36   | 8      | 29     | 35    | 8       | 28      | A    | 1           | 214737.758   | 0.023                      | 316.8480  |
| 35   | 10     | 25     | 34    | 10      | 24      | A    | 0           | 214757.305   | 0.086                      | 199.9816  |
| 35   | 10     | 25     | 34    | 10      | 24      | E    | 0           | 214762.251   | 0.077                      | 199.9909  |
| 39   | 4      | 35     | 38    | 4       | 34      | A    | 1           | 214805.329   | 0.121                      | 325.7352  |
| 39   | 5      | 35     | 38    | 5       | 34      | A    | 1           | 214805.329   | 0.121                      | 325.7353  |
| 38   | 6      | 33     | 37    | 6       | 32      | A    | 1           | 214814.700   | -0.054                     | 323.2904  |
| 35   | 10     | 25     | 34    | 10      | 24      | A    | 1           | 214817.411   | -0.109                     | 316.5897  |
| 38   | 5      | 33     | 37    | 5       | 32      | A    | 1           | 214831.703   | -0.052                     | 323.2891  |
| 36   | 14     | 22     | 35    | 14      | 21      | E    | 1           | 214857.547   | 0.171                      | 341.5992  |
| 40   | 3      | 37     | 39    | 3       | 36      | A    | 1           | 214912.081   | -0.099                     | 327.7096  |
| 40   | 4      | 37     | 39    | 3       | 36      | A    | 1           | 214912.081   | -0.099                     | 327.7096  |
| 40   | 3      | 37     | 39    | 4       | 36      | A    | 1           | 214912.081   | -0.099                     | 327.7096  |
| 40   | 4      | 37     | 39    | 4       | 36      | A    | 1           | 214912.081   | -0.099                     | 327.7096  |
| 36   | 14     | 23     | 35    | 14      | 22      | E    | 1           | 214933.532   | 0.212                      | 340.9794  |
| 36   | 8      | 29     | 35    | 8       | 28      | E    | 0           | 214956.414   | -0.042                     | 200.2064  |
| 36   | 8      | 29     | 35    | 8       | 28      | A    | 0           | 214962.098   | 0.035                      | 200.1956  |
| 39   | 5      | 35     | 38    | 5       | 34      | E    | 1           | 214967.873   | 0.033                      | 325.3608  |
| 39   | 4      | 35     | 38    | 4       | 34      | E    | 1           | 214967.873   | 0.033                      | 325.3607  |
| 37   | 7      | 31     | 36    | 7       | 30      | A    | 1           | 214974.993   | -0.056                     | 320.3307  |
| 39   | 4      | 35     | 38    | 4       | 34      | E    | 0           | 214988.787   | -0.007                     | 209.0645  |
| 39   | 5      | 35     | 38    | 5       | 34      | E    | 0           | 214988.787   | -0.007                     | 209.0645  |
| 39   | 4      | 35     | 38    | 4       | 34      | A    | 0           | 214993.712   | -0.096                     | 209.0527  |
| 39   | 5      | 35     | 38    | 5       | 34      | A    | 0           | 214993.712   | -0.096                     | 209.0528  |
| 36   | 14     | 23     | 35    | 14      | 22      | A    | 1           | 214997.038   | 0.095                      | 341.2804  |
| 36   | 14     | 22     | 35    | 14      | 21      | A    | 1           | 214997.038   | 0.095                      | 341.2804  |
| 38   | 5      | 33     | 37    | 6       | 32      | E    | 0           | 215000.464   | -0.004                     | 206.6343  |
| 35   | 23     | 12     | 34    | 23      | 12      | E    | 1           | 215000.464   | 0.237                      | 399.8480  |
| 38   | 5      | 33     | 37    | 6       | 32      | A    | 0           | 215006.356   | -0.124                     | 206.6230  |
| 38   | 6      | 33     | 37    | 6       | 32      | E    | 1           | 215015.306   | 0.104                      | 322.9325  |
| 38   | 6      | 33     | 37    | 6       | 32      | E    | 0           | 215025.481   | 0.033                      | 206.6343  |
| 38   | 6      | 33     | 37    | 6       | 32      | A    | 0           | 215031.631   | 0.002                      | 206.6230  |
| 38   | 5      | 33     | 37    | 5       | 32      | E    | 1           | 215035.269   | 0.093                      | 322.9310  |
| 40   | 4      | 37     | 39    | 4       | 36      | E    | 1           | 215039.762   | -0.026                     | 327.3093  |
| 40   | 3      | 37     | 39    | 4       | 36      | E    | 1           | 215039.762   | -0.026                     | 327.3093  |
| 40   | 4      | 37     | 39    | 3       | 36      | E    | 1           | 215039.762   | -0.026                     | 327.3093  |
| 40   | 3      | 37     | 39    | 3       | 36      | E    | 1           | 215039.762   | -0.026                     | 327.3093  |
| 38   | 5      | 33     | 37    | 5       | 32      | E    | 0           | 215044.413   | 0.097                      | 206.6328  |
| 38   | 5      | 33     | 37    | 5       | 32      | A    | 0           | 215050.595   | -0.016                     | 206.6216  |
| 38   | 6      | 33     | 37    | 5       | 32      | E    | 1           | 215061.870   | 0.016                      | 322.9310  |
| 36   | 14     | 23     | 35    | 14      | 22      | A    | 0           | 215069.725   | -0.223                     | 224.8586  |
| 40   | 3      | 37     | 39    | 3       | 36      | E    | 0           | 215069.725   | -0.001                     | 211.0182  |
| 40   | 4      | 37     | 39    | 3       | 36      | E    | 0           | 215069.725   | -0.001                     | 211.0182  |
| 40   | 3      | 37     | 39    | 4       | 36      | E    | 0           | 215069.725   | -0.001                     | 211.0182  |
| 40   | 4      | 37     | 39    | 4       | 36      | E    | 0           | 215069.725   | -0.001                     | 211.0182  |
| 36   | 14     | 22     | 35    | 14      | 21      | E    | 0           | 215072.086   | -0.096                     | 224.8682  |
| 40   | 3      | 37     | 39    | 3       | 36      | A    | 0           | 215073.612   | -0.038                     | 211.0056  |
| 40   | 4      | 37     | 39    | 3       | 36      | A    | 0           | 215073.612   | -0.038                     | 211.0056  |
| 40   | 3      | 37     | 39    | 4       | 36      | A    | 0           | 215073.612   | -0.038                     | 211.0056  |
| 40   | 4      | 37     | 39    | 4       | 36      | A    | 0           | 215073.612   | -0.038                     | 211.0056  |
| 41   | 2      | 39     | 40    | 2       | 38      | A    | 1           | 215080.702   | -0.154                     | 329.2445  |
| 41   | 3      | 39     | 40    | 2       | 38      | A    | 1           | 215080.702   | -0.154                     | 329.2445  |
| 41   | 2      | 39     | 40    | 3       | 38      | A    | 1           | 215080.702   | -0.154                     | 329.2445  |
| 41   | 3      | 39     | 40    | 3       | 38      | A    | 1           | 215080.702   | -0.154                     | 329.2445  |
| 41   | 3      | 39     | 40    | 3       | 38      | E    | 1           | 215173.734   | 0.117                      | 328.8096  |
| 41   | 2      | 39     | 40    | 3       | 38      | E    | 1           | 215173.734   | 0.117                      | 328.8096  |
| 41   | 3      | 39     | 40    | 2       | 38      | E    | 1           | 215173.734   | 0.117                      | 328.8096  |
| 41   | 2      | 39     | 40    | 2       | 38      | E    | 1           | 215173.734   | 0.117                      | 328.8096  |
| 37   | 7      | 31     | 36    | 7       | 30      | E    | 0           | 215209.700   | -0.035                     | 203.6830  |
| 41   | 2      | 39     | 40    | 2       | 38      | E    | 0           | 215211.960   | -0.067                     | 212.5265  |
| 41   | 3      | 39     | 40    | 2       | 38      | E    | 0           | 215211.960   | -0.067                     | 212.5265  |
| 41   | 2      | 39     | 40    | 3       | 38      | E    | 0           | 215211.960   | -0.067                     | 212.5265  |
| 41   | 3      | 39     | 40    | 3       | 38      | E    | 0           | 215211.960   | -0.067                     | 212.5265  |
| 37   | 7      | 31     | 36    | 7       | 30      | E    | 1           | 215211.960   | 0.036                      | 319.9797  |
| 41   | 2      | 39     | 40    | 2       | 38      | A    | 0           | 215214.819   | -0.051                     | 212.5128  |
| 41   | 3      | 39     | 40    | 2       | 38      | A    | 0           | 215214.819   | -0.051                     | 212.5128  |
| 41   | 2      | 39     | 40    | 3       | 38      | A    | 0           | 215214.819   | -0.051                     | 212.5128  |
| 41   | 3      | 39     | 40    | 3       | 38      | A    | 0           | 215214.819   | -0.051                     | 212.5128  |
| 37   | 7      | 31     | 36    | 7       | 30      | A    | 0           | 215216.894   | 0.022                      | 203.6720  |
| 37   | 6      | 31     | 36    | 6       | 30      | A    | 1           | 215277.853   | 0.027                      | 320.3051  |
| 42   | 1      | 41     | 41    | 1       | 40      | A    | 1           | 215280.992   | -0.040                     | 330.3606  |
| 42   | 2      | 41     | 41    | 1       | 40      | A    | 1           | 215280.992   | -0.040                     | 330.3606  |
| 42   | 1      | 41     | 41    | 2       | 40      | A    | 1           | 215280.992   | -0.040                     | 330.3606  |
| 42   | 2      | 41     | 41    | 2       | 40      | A    | 1           | 215280.992   | -0.040                     | 330.3606  |
| 42   | 2      | 41     | 41    | 2       | 40      | E    | 1           | 215336.876   | -0.040                     | 329.8823  |
| 42   | 1      | 41     | 41    | 2       | 40      | E    | 1           | 215336.876   | -0.040                     | 329.8823  |
| 42   | 2      | 41     | 41    | 1       | 40      | E    | 1           | 215336.876   | -0.040                     | 329.8823  |
| 42   | 1      | 41     | 41    | 1       | 40      | E    | 1           | 215336.876   | -0.040                     | 329.8823  |
| 42   | 1      | 41     | 41    | 1       | 40      | E    | 0           | 215384.068   | -0.088                     | 213.6098  |
| 42   | 2      | 41     | 41    | 1       | 40      | E    | 0           | 215384.068   | -0.088                     | 213.6098  |
| 42   | 1      | 41     | 41    | 2       | 40      | E    | 0           | 215384.068   | -0.088                     | 213.6098  |
| 42   | 2      | 41     | 41    | 2       | 40      | E    | 0           | 215384.068   | -0.088                     | 213.6098  |
| 42   | 1      | 41     | 41    | 1       | 40      | A    | 0           | 215385.847   | -0.015                     | 213.5948  |
| 42   | 2      | 41     | 41    | 1       | 40      | A    | 0           | 215385.847   | -0.015                     | 213.5948  |
| 42   | 1      | 41     | 41    | 2       | 40      | A    | 0           | 215385.847   | -0.015                     | 213.5948  |
| 42   | 2      | 41     | 41    | 2       | 40      | A    | 0           | 215385.847   | -0.015                     | 213.5948  |
| 43   | 0      | 43     | 42    | 0       | 42      | A    | 1           | 215496.914   | -0.054                     | 331.0724  |
| 43   | 1      | 43     | 42    | 0       | 42      | A    | 1           | 215496.914   | -0.054                     | 331.0724  |
| 43   | 0      | 43     | 42    | 1       | 42      | A    | 1           | 215496.914   | -0.054                     | 331.0724  |
| 43   | 1      | 43     | 42    | 1       | 42      | A    | 1           | 215496.914   | -0.054                     | 331.0724  |
| 43   | 0      | 43     | 42    | 1       | 42      | E    | 1           | 215512.277   | -0.056                     | 330.5412  |
| 43   | 0      | 43     | 42    | 1       | 42      | E    | 1           | 215512.277   | -0.056                     | 330.5412  |
| 43   | 1      | 43     | 42    | 0       | 42      | E    | 1           | 215512.277   | -0.056                     | 330.5412  |
| 43   | 0      | 43     | 42    | 0       | 42      | E    | 1           | 215512.277   | -0.056                     | 330.5412  |
| 37   | 6      | 31     | 36    | 6       | 30      | E    | 0           | 215539.072   | -0.012                     | 203.6549  |
| 37   | 6      | 31     | 36    | 6       | 30      | A    | 0           | 215548.145   | 0.289                      | 203.6438  |
| 22   | 8      | 15     | 21    | 7       | 14      | A    | 0           | 215555.597   | -0.141                     | 117.1700  |
| 37   | 6      | 31     | 36    | 6       | 30      | E    | 1           | 215555.597   | -0.065                     | 319.9502  |
| 36   | 13     | 23     | 35    | 13      | 22      | E    | 1           | 215557.401   | 0.143                      | 336.3978  |
| 43   | 1      | 43     | 42    | 0       | 42      | A    | 0           | 215569.539   | -0.280                     | 214.2656  |
| 43   | 0      | 43     | 42    | 1       | 42      | A    | 0           | 215569.539   | -0.280                     | 214.2656  |
| 43   | 1      | 43     | 42    | 1       | 42      | A    | 0           | 215569.539   | -0.280                     | 214.2656  |

| $J'$ | $K'_a$ | $K'_c$ | $J''$ | $K''_a$ | $K''_c$ | Sym. | $v_{tCH_3}$ | $\nu_{Obs.}$ | $\nu_{Obs.} - \nu_{Calc.}$ | $E_{low}$ |
|------|--------|--------|-------|---------|---------|------|-------------|--------------|----------------------------|-----------|
| 43   | 0      | 43     | 42    | 0       | 42      | E    | 0           | 215569.539   | 0.187                      | 214.2822  |
| 43   | 1      | 43     | 42    | 0       | 42      | E    | 0           | 215569.539   | 0.187                      | 214.2822  |
| 43   | 0      | 43     | 42    | 1       | 42      | E    | 0           | 215569.539   | 0.187                      | 214.2822  |
| 43   | 1      | 43     | 42    | 1       | 42      | E    | 0           | 215569.539   | 0.187                      | 214.2822  |
| 36   | 13     | 24     | 35    | 13      | 23      | E    | 1           | 215668.159   | 0.166                      | 335.7870  |
| 36   | 13     | 24     | 35    | 13      | 23      | A    | 1           | 215729.662   | -0.061                     | 336.1527  |
| 36   | 13     | 23     | 35    | 13      | 22      | A    | 1           | 215737.452   | 0.122                      | 336.1530  |
| 36   | 13     | 24     | 35    | 13      | 23      | A    | 0           | 215793.912   | 0.105                      | 219.6865  |
| 36   | 13     | 23     | 35    | 13      | 22      | E    | 0           | 215799.396   | 0.014                      | 219.6982  |
| 36   | 13     | 23     | 35    | 13      | 22      | A    | 0           | 215801.001   | 0.197                      | 219.6868  |
| 36   | 13     | 24     | 35    | 13      | 23      | E    | 0           | 215802.937   | 0.199                      | 219.6790  |
| 37   | 7      | 30     | 36    | 8       | 29      | A    | 0           | 215884.836   | 0.191                      | 207.3659  |
| 37   | 7      | 30     | 36    | 8       | 29      | E    | 0           | 215898.215   | 0.151                      | 207.3766  |
| 37   | 7      | 30     | 36    | 8       | 29      | A    | 1           | 215986.119   | -0.170                     | 324.0108  |
| 21   | 6      | 15     | 20    | 4       | 16      | E    | 0           | 216051.189   | 0.047                      | 107.8058  |
| 37   | 7      | 31     | 36    | 6       | 30      | E    | 0           | 216051.189   | 0.047                      | 203.6549  |
| 37   | 7      | 31     | 36    | 6       | 30      | A    | 0           | 216062.852   | 0.055                      | 203.6438  |
| 37   | 7      | 31     | 36    | 6       | 30      | E    | 1           | 216095.903   | 0.033                      | 319.9502  |
| 36   | 12     | 24     | 35    | 12      | 23      | E    | 1           | 216494.804   | 0.147                      | 331.6433  |
| 48   | 3      | 46     | 48    | 2       | 47      | E    | 1           | 216520.725   | 0.205                      | 383.6325  |
| 48   | 2      | 46     | 48    | 2       | 47      | E    | 1           | 216520.725   | 0.205                      | 383.6325  |
| 48   | 3      | 46     | 48    | 1       | 47      | E    | 1           | 216520.725   | 0.205                      | 383.6325  |
| 48   | 2      | 46     | 48    | 1       | 47      | E    | 1           | 216520.725   | 0.205                      | 383.6325  |
| 23   | 7      | 16     | 22    | 6       | 17      | E    | 0           | 216629.002   | 0.032                      | 119.0990  |
| 23   | 7      | 16     | 22    | 6       | 17      | A    | 0           | 216643.222   | -0.259                     | 119.0854  |
| 36   | 12     | 25     | 35    | 12      | 24      | E    | 1           | 216659.198   | 0.182                      | 331.0540  |
| 36   | 12     | 25     | 35    | 12      | 24      | A    | 1           | 216683.997   | 0.126                      | 331.4782  |
| 36   | 12     | 25     | 35    | 12      | 24      | A    | 0           | 216737.368   | 0.080                      | 214.9670  |
| 36   | 12     | 24     | 35    | 12      | 23      | A    | 1           | 216766.302   | 0.021                      | 331.4812  |
| 36   | 12     | 25     | 35    | 12      | 24      | E    | 0           | 216774.357   | 0.088                      | 214.9632  |
| 36   | 12     | 24     | 35    | 12      | 23      | E    | 0           | 216785.856   | 0.038                      | 214.9820  |
| 36   | 12     | 24     | 35    | 12      | 23      | A    | 0           | 216813.702   | 0.121                      | 214.9698  |
| 20   | 9      | 12     | 19    | 8       | 11      | A    | 1           | 216941.428   | 0.294                      | 228.4930  |
| 20   | 9      | 11     | 19    | 8       | 12      | A    | 1           | 216971.286   | -0.065                     | 228.4921  |
| 22   | 8      | 14     | 21    | 7       | 15      | A    | 0           | 217224.118   | -0.160                     | 117.1228  |
| 23   | 2      | 21     | 22    | 1       | 21      | E    | 0           | 217489.223   | 0.061                      | 108.5157  |
| 36   | 7      | 29     | 35    | 7       | 28      | A    | 1           | 217579.122   | -0.070                     | 316.5564  |
| 13   | 7      | 6      | 12    | 5       | 7       | A    | 0           | 217601.099   | -0.373                     | 81.9692   |
| 37   | 31     | 6      | 36    | 31      | 5       | A    | 0           | 217624.720   | -0.346                     | 382.8875  |
| 37   | 31     | 7      | 36    | 31      | 6       | A    | 0           | 217624.720   | -0.346                     | 382.8875  |
| 37   | 29     | 8      | 36    | 29      | 7       | A    | 1           | 217636.727   | 0.113                      | 475.2258  |
| 37   | 29     | 9      | 36    | 29      | 8       | A    | 1           | 217636.727   | 0.113                      | 475.2258  |
| 37   | 29     | 9      | 36    | 29      | 8       | E    | 1           | 217641.903   | 0.021                      | 475.6847  |
| 22   | 8      | 14     | 21    | 7       | 14      | E    | 1           | 217672.283   | 0.139                      | 233.7008  |
| 37   | 30     | 7      | 36    | 30      | 6       | A    | 0           | 217691.921   | -0.220                     | 370.7988  |
| 37   | 30     | 8      | 36    | 30      | 7       | A    | 0           | 217691.921   | -0.220                     | 370.7988  |
| 37   | 28     | 9      | 36    | 28      | 8       | E    | 1           | 217704.051   | 0.023                      | 464.5017  |
| 37   | 28     | 10     | 36    | 28      | 9       | A    | 1           | 217718.391   | 0.258                      | 463.9211  |
| 37   | 28     | 9      | 36    | 28      | 8       | A    | 1           | 217718.391   | 0.258                      | 463.9211  |
| 37   | 28     | 10     | 36    | 28      | 9       | E    | 1           | 217721.114   | 0.066                      | 464.4270  |
| 37   | 29     | 8      | 36    | 29      | 7       | A    | 0           | 217765.026   | -0.203                     | 359.1083  |
| 37   | 29     | 9      | 36    | 29      | 8       | A    | 0           | 217765.026   | -0.203                     | 359.1083  |
| 37   | 27     | 11     | 36    | 27      | 10      | E    | 1           | 217790.439   | 0.132                      | 453.5670  |
| 37   | 27     | 10     | 36    | 27      | 9       | A    | 1           | 217808.026   | 0.108                      | 453.0205  |
| 37   | 27     | 11     | 36    | 27      | 10      | A    | 1           | 217808.026   | 0.108                      | 453.0205  |
| 37   | 27     | 10     | 36    | 27      | 9       | E    | 1           | 217808.026   | 0.121                      | 453.5682  |
| 36   | 11     | 26     | 35    | 11      | 25      | A    | 1           | 217828.927   | 0.057                      | 327.2758  |
| 37   | 28     | 9      | 36    | 28      | 8       | A    | 0           | 217845.155   | -0.099                     | 347.8161  |
| 37   | 28     | 10     | 36    | 28      | 9       | A    | 0           | 217845.155   | -0.099                     | 347.8161  |
| 36   | 11     | 25     | 35    | 11      | 24      | E    | 1           | 217858.570   | 0.242                      | 327.3645  |
| 36   | 9      | 28     | 35    | 9       | 27      | A    | 1           | 217874.304   | 0.037                      | 320.1561  |
| 36   | 11     | 26     | 35    | 11      | 25      | A    | 0           | 217878.262   | 0.052                      | 210.7198  |
| 37   | 26     | 11     | 36    | 26      | 10      | E    | 1           | 217903.894   | 0.165                      | 443.1056  |
| 37   | 26     | 12     | 36    | 26      | 11      | A    | 1           | 217907.443   | 0.139                      | 442.5244  |
| 37   | 26     | 11     | 36    | 26      | 10      | A    | 1           | 217907.443   | 0.139                      | 442.5244  |
| 36   | 11     | 26     | 35    | 11      | 25      | E    | 0           | 217913.621   | 0.027                      | 210.7237  |
| 37   | 27     | 10     | 36    | 27      | 9       | A    | 0           | 217933.291   | -0.027                     | 336.9228  |
| 37   | 27     | 11     | 36    | 27      | 10      | A    | 0           | 217933.291   | -0.027                     | 336.9228  |
| 37   | 27     | 11     | 36    | 27      | 10      | E    | 0           | 217933.291   | -0.012                     | 336.9055  |
| 20   | 9      | 12     | 19    | 8       | 12      | E    | 1           | 217938.297   | -0.263                     | 227.9086  |
| 36   | 7      | 29     | 35    | 7       | 28      | E    | 0           | 217959.908   | 0.016                      | 199.8943  |
| 36   | 7      | 29     | 35    | 7       | 28      | A    | 0           | 217975.219   | -0.005                     | 199.8822  |
| 36   | 9      | 28     | 35    | 9       | 27      | E    | 0           | 218028.557   | 0.335                      | 203.5349  |
| 36   | 9      | 28     | 35    | 9       | 27      | A    | 0           | 218028.865   | -0.224                     | 203.5249  |
| 37   | 26     | 11     | 36    | 26      | 10      | A    | 0           | 218030.908   | 0.160                      | 326.4287  |
| 37   | 26     | 12     | 36    | 26      | 11      | A    | 0           | 218030.908   | 0.160                      | 326.4287  |
| 37   | 26     | 12     | 36    | 26      | 11      | E    | 0           | 218030.908   | 0.064                      | 326.4103  |
| 36   | 7      | 29     | 35    | 7       | 28      | E    | 1           | 218037.573   | -0.078                     | 316.1757  |
| 36   | 11     | 26     | 35    | 11      | 25      | E    | 1           | 218083.636   | 0.205                      | 326.8114  |
| 37   | 25     | 12     | 36    | 25      | 11      | A    | 0           | 218139.228   | 0.078                      | 316.3343  |
| 37   | 25     | 13     | 36    | 25      | 12      | A    | 0           | 218139.228   | 0.078                      | 316.3343  |
| 37   | 25     | 13     | 36    | 25      | 12      | E    | 0           | 218139.228   | -0.151                     | 316.3152  |
| 37   | 24     | 13     | 36    | 24      | 12      | A    | 1           | 218141.762   | 0.074                      | 422.7479  |
| 37   | 24     | 14     | 36    | 24      | 13      | A    | 1           | 218141.762   | 0.074                      | 422.7479  |
| 37   | 24     | 13     | 36    | 24      | 12      | A    | 0           | 218260.601   | 0.115                      | 306.6402  |
| 37   | 24     | 14     | 36    | 24      | 13      | A    | 0           | 218260.601   | 0.115                      | 306.6402  |
| 37   | 24     | 14     | 36    | 24      | 13      | E    | 0           | 218260.601   | -0.270                     | 306.6206  |
| 37   | 23     | 14     | 36    | 23      | 13      | A    | 1           | 218281.326   | 0.237                      | 413.4686  |
| 37   | 23     | 15     | 36    | 23      | 14      | A    | 1           | 218281.326   | 0.237                      | 413.4686  |
| 36   | 9      | 28     | 35    | 9       | 27      | E    | 1           | 218338.432   | 0.039                      | 319.7992  |
| 37   | 23     | 14     | 36    | 23      | 13      | A    | 0           | 218397.436   | 0.259                      | 297.3473  |
| 37   | 23     | 15     | 36    | 23      | 14      | A    | 0           | 218397.436   | 0.259                      | 297.3473  |
| 37   | 23     | 15     | 36    | 23      | 14      | E    | 0           | 218397.436   | -0.309                     | 297.3274  |
| 37   | 22     | 16     | 36    | 22      | 15      | E    | 1           | 218401.964   | 0.090                      | 404.8724  |
| 37   | 22     | 15     | 36    | 22      | 14      | E    | 1           | 218413.707   | 0.184                      | 405.2275  |
| 37   | 22     | 15     | 36    | 22      | 14      | A    | 1           | 218439.373   | 0.231                      | 404.5961  |
| 37   | 22     | 16     | 36    | 22      | 15      | A    | 1           | 218439.373   | 0.231                      | 404.5961  |
| 36   | 11     | 25     | 35    | 11      | 24      | E    | 0           | 218482.896   | 0.081                      | 210.7569  |
| 36   | 11     | 25     | 35    | 11      | 24      | A    | 1           | 218500.316   | -0.019                     | 327.3060  |
| 36   | 11     | 25     | 35    | 11      | 24      | A    | 0           | 218506.138   | 0.044                      | 210.7479  |
| 37   | 22     | 15     | 36    | 22      | 14      | A    | 0           | 218552.357   | 0.119                      | 288.4564  |
| 37   | 22     | 16     | 36    | 22      | 15      | A    | 0           | 218552.357   | 0.119                      | 288.4564  |
| 37   | 22     | 16     | 36    | 22      | 15      | E    | 0           | 218553.280   | 0.262                      | 288.4365  |
| 37   | 21     | 17     | 36    | 21      | 16      | E    | 1           | 218578.320   | 0.131                      | 396.3387  |
| 37   | 21     | 16     | 36    | 21      | 15      | E    | 1           | 218586.309   | 0.239                      | 396.7531  |
| 37   | 21     | 17     | 36    | 21      | 16      | A    | 1           | 218619.937   | 0.264                      | 396.1313  |
| 37   | 21     | 16     | 36    | 21      | 15      | A    | 1           | 218619.937   | 0.264                      | 396.1313  |
| 36   | 10     | 27     | 35    | 10      | 26      | A    | 1           | 218645.079   | 0.006                      | 323.5402  |
| 18   | 10     | 8      | 17    | 9       | 8       | E    | 0           | 218695.880   | 0.338                      | 107.7935  |
| 36   | 10     | 27     | 35    | 10      | 26      | A    | 0           | 218723.927   | 0.068                      | 206.9423  |
| 17   | 4      | 14     | 16    | 2       | 15      | E    | 0           | 218723.927   | 0.068                      | 87.7275   |
| 37   | 21     | 16     | 36    | 21      | 15      | A    | 0           | 218729.371   | -0.103                     | 279.9685  |
| 37   | 21     | 17     | 36    | 21      | 16      | A    | 0           | 218729.371   | -0.103                     | 279.9685  |
| 36   | 10     | 27     | 35    | 10      | 26      | E    | 0           | 218730.727   | 0.197                      | 206.9504  |
| 37   | 21     | 17     | 36    | 21      | 16      | E    | 0           | 218730.727   | 0.197                      | 279.9490  |
| 18   | 10     | 9      | 17    | 9       | 8       | A    | 0           | 218733.981   | 0.334                      | 107.7761  |

| $J'$ | $K'_a$ | $K'_c$ | $J''$ | $K''_a$ | $K''_c$ | Sym. | $v_{tCH_3}$ | $\nu_{Obs.}$ | $\nu_{Obs.} - \nu_{Calc.}$ | $E_{low}$ |
|------|--------|--------|-------|---------|---------|------|-------------|--------------|----------------------------|-----------|
| 18   | 10     | 8      | 17    | 9       | 9       | A    | 0           | 218733.981   | 0.334                      | 107.7761  |
| 37   | 20     | 17     | 36    | 20      | 16      | E    | 1           | 218784.804   | 0.120                      | 388.6785  |
| 35   | 9      | 26     | 34    | 9       | 25      | E    | 1           | 218807.995   | 0.197                      | 313.4461  |
| 37   | 20     | 18     | 36    | 20      | 17      | A    | 1           | 218827.856   | 0.277                      | 388.0752  |
| 37   | 20     | 17     | 36    | 20      | 16      | A    | 1           | 218827.856   | 0.277                      | 388.0752  |
| 37   | 20     | 17     | 36    | 20      | 16      | A    | 0           | 218933.706   | -0.046                     | 271.8852  |
| 37   | 20     | 18     | 36    | 20      | 17      | A    | 0           | 218933.706   | -0.046                     | 271.8852  |
| 37   | 20     | 18     | 36    | 20      | 17      | E    | 0           | 218935.287   | 0.219                      | 271.8663  |
| 37   | 19     | 18     | 36    | 19      | 17      | E    | 1           | 219015.606   | 0.132                      | 381.0051  |
| 37   | 19     | 19     | 36    | 19      | 18      | E    | 1           | 219019.441   | 0.195                      | 380.4911  |
| 37   | 19     | 19     | 36    | 19      | 18      | A    | 1           | 219069.413   | 0.180                      | 380.4293  |
| 37   | 19     | 18     | 36    | 19      | 17      | A    | 1           | 219069.413   | 0.180                      | 380.4293  |
| 37   | 19     | 18     | 36    | 19      | 17      | A    | 0           | 219171.446   | 0.050                      | 264.2082  |
| 37   | 19     | 19     | 36    | 19      | 18      | A    | 0           | 219171.446   | 0.050                      | 264.2082  |
| 37   | 19     | 19     | 36    | 19      | 18      | E    | 0           | 219173.157   | 0.108                      | 264.1902  |
| 20   | 9      | 11     | 19    | 8       | 11      | E    | 1           | 219251.427   | 0.034                      | 228.4045  |
| 37   | 18     | 19     | 36    | 18      | 18      | E    | 1           | 219286.717   | 0.198                      | 373.7351  |
| 37   | 18     | 20     | 36    | 18      | 19      | E    | 1           | 219298.991   | 0.111                      | 373.1823  |
| 37   | 18     | 19     | 36    | 18      | 18      | A    | 1           | 219353.319   | 0.242                      | 373.1955  |
| 37   | 18     | 20     | 36    | 18      | 19      | A    | 1           | 219353.319   | 0.242                      | 373.1955  |
| 37   | 18     | 19     | 36    | 18      | 18      | A    | 0           | 219450.858   | 0.075                      | 256.9398  |
| 37   | 18     | 20     | 36    | 18      | 19      | A    | 0           | 219450.858   | 0.075                      | 256.9398  |
| 37   | 18     | 19     | 36    | 18      | 18      | E    | 0           | 219452.805   | 0.136                      | 256.9402  |
| 37   | 18     | 20     | 36    | 18      | 19      | E    | 0           | 219452.805   | 0.136                      | 256.9229  |
| 47   | 2      | 46     | 47    | 1       | 47      | E    | 1           | 219472.894   | 0.075                      | 368.1374  |
| 47   | 1      | 46     | 47    | 1       | 47      | E    | 1           | 219472.894   | 0.075                      | 368.1374  |
| 47   | 2      | 46     | 47    | 0       | 47      | E    | 1           | 219472.894   | 0.075                      | 368.1374  |
| 47   | 1      | 46     | 47    | 0       | 47      | E    | 1           | 219472.894   | 0.075                      | 368.1374  |
| 37   | 17     | 20     | 36    | 17      | 19      | E    | 1           | 219608.948   | 0.203                      | 366.8713  |
| 38   | 6      | 32     | 37    | 7       | 31      | A    | 1           | 219619.442   | -0.112                     | 327.5015  |
| 37   | 17     | 21     | 36    | 17      | 20      | E    | 1           | 219632.365   | 0.097                      | 366.2882  |
| 36   | 10     | 27     | 35    | 10      | 26      | E    | 1           | 219660.446   | 0.114                      | 323.1062  |
| 37   | 17     | 21     | 36    | 17      | 20      | A    | 1           | 219690.764   | 0.195                      | 366.3763  |
| 37   | 17     | 20     | 36    | 17      | 19      | A    | 1           | 219690.764   | 0.195                      | 366.3763  |
| 39   | 5      | 34     | 38    | 6       | 33      | A    | 1           | 219728.809   | -0.156                     | 330.4559  |
| 35   | 9      | 26     | 34    | 9       | 25      | A    | 0           | 219731.417   | -0.060                     | 197.0882  |
| 35   | 9      | 26     | 34    | 9       | 25      | E    | 0           | 219741.613   | -0.131                     | 197.0998  |
| 39   | 6      | 34     | 38    | 6       | 33      | A    | 1           | 219741.618   | 0.118                      | 330.4559  |
| 40   | 4      | 36     | 39    | 4       | 35      | A    | 1           | 219748.021   | -0.056                     | 332.9004  |
| 40   | 5      | 36     | 39    | 4       | 35      | A    | 1           | 219748.021   | -0.056                     | 332.9004  |
| 40   | 4      | 36     | 39    | 5       | 35      | A    | 1           | 219748.021   | -0.056                     | 332.9004  |
| 40   | 5      | 36     | 39    | 5       | 35      | A    | 1           | 219748.021   | -0.056                     | 332.9004  |
| 39   | 5      | 34     | 38    | 5       | 33      | A    | 1           | 219751.231   | -0.009                     | 330.4551  |
| 35   | 9      | 26     | 34    | 9       | 25      | A    | 1           | 219773.413   | -0.010                     | 313.7599  |
| 37   | 17     | 20     | 36    | 17      | 19      | A    | 0           | 219783.381   | 0.114                      | 250.0830  |
| 37   | 17     | 21     | 36    | 17      | 20      | A    | 0           | 219783.381   | 0.114                      | 250.0830  |
| 37   | 17     | 20     | 36    | 17      | 19      | E    | 0           | 219785.586   | 0.133                      | 250.0858  |
| 37   | 17     | 21     | 36    | 17      | 20      | E    | 0           | 219785.586   | 0.133                      | 250.0675  |
| 38   | 6      | 32     | 37    | 7       | 31      | E    | 1           | 219808.287   | 0.103                      | 327.1584  |
| 38   | 6      | 32     | 37    | 7       | 31      | E    | 0           | 219827.034   | 0.116                      | 210.8616  |
| 38   | 6      | 32     | 37    | 7       | 31      | A    | 0           | 219832.370   | 0.086                      | 210.8508  |
| 41   | 3      | 38     | 40    | 3       | 37      | A    | 1           | 219862.543   | -0.054                     | 334.8783  |
| 41   | 4      | 38     | 40    | 3       | 37      | A    | 1           | 219862.543   | -0.054                     | 334.8783  |
| 41   | 3      | 38     | 40    | 4       | 37      | A    | 1           | 219862.543   | -0.054                     | 334.8783  |
| 41   | 4      | 38     | 40    | 4       | 37      | A    | 1           | 219862.543   | -0.054                     | 334.8783  |
| 37   | 8      | 30     | 36    | 8       | 29      | A    | 1           | 219868.307   | 0.029                      | 324.0108  |
| 38   | 7      | 32     | 37    | 7       | 31      | A    | 1           | 219897.918   | -0.048                     | 327.5015  |
| 40   | 5      | 36     | 39    | 5       | 35      | E    | 1           | 219909.389   | 0.098                      | 332.5313  |
| 40   | 4      | 36     | 39    | 4       | 35      | E    | 1           | 219909.389   | 0.098                      | 332.5313  |
| 39   | 5      | 34     | 38    | 6       | 33      | E    | 1           | 219924.676   | 0.179                      | 330.1047  |
| 40   | 4      | 36     | 39    | 4       | 35      | E    | 0           | 219932.390   | 0.019                      | 216.2357  |
| 40   | 5      | 36     | 39    | 5       | 35      | E    | 0           | 219932.390   | 0.019                      | 216.2358  |
| 40   | 4      | 36     | 39    | 4       | 35      | A    | 0           | 219937.389   | 0.047                      | 216.2242  |
| 40   | 5      | 36     | 39    | 5       | 35      | A    | 0           | 219937.389   | 0.047                      | 216.2242  |
| 39   | 6      | 34     | 38    | 6       | 33      | E    | 1           | 219939.796   | 0.159                      | 330.1047  |
| 39   | 5      | 34     | 38    | 6       | 33      | A    | 0           | 219943.948   | -0.392                     | 213.7957  |
| 39   | 5      | 34     | 38    | 5       | 33      | E    | 1           | 219950.992   | -0.184                     | 330.1038  |
| 39   | 6      | 34     | 38    | 6       | 33      | E    | 0           | 219952.464   | 0.017                      | 213.8067  |
| 39   | 6      | 34     | 38    | 6       | 33      | A    | 0           | 219958.476   | -0.087                     | 213.7957  |
| 39   | 5      | 34     | 38    | 5       | 33      | E    | 0           | 219963.247   | -0.058                     | 213.8059  |
| 39   | 5      | 34     | 38    | 5       | 33      | A    | 0           | 219969.414   | -0.075                     | 213.7949  |
| 39   | 6      | 34     | 38    | 5       | 33      | E    | 0           | 219977.476   | 0.048                      | 213.8059  |
| 39   | 6      | 34     | 38    | 5       | 33      | A    | 0           | 219984.098   | 0.387                      | 213.7949  |
| 16   | 11     | 5      | 15    | 10      | 5       | E    | 1           | 219984.098   | -0.461                     | 221.7222  |
| 41   | 4      | 38     | 40    | 4       | 37      | E    | 1           | 219989.524   | 0.048                      | 334.4822  |
| 41   | 3      | 38     | 40    | 4       | 37      | E    | 1           | 219989.524   | 0.048                      | 334.4822  |
| 41   | 4      | 38     | 40    | 3       | 37      | E    | 1           | 219989.524   | 0.048                      | 334.4822  |
| 41   | 3      | 38     | 40    | 3       | 37      | E    | 1           | 219989.524   | 0.048                      | 334.4822  |
| 37   | 16     | 21     | 36    | 16      | 20      | E    | 1           | 219997.580   | 0.238                      | 360.4178  |
