# Supplementary material for: Millimeter-Wave Spectroscopy of Methylfuran Isomers: Local vs. Global Treatments of the Internal Rotation
Source: Molecules. 2022 Jun 2;27(11):3591. doi: 10.3390/molecules27113591 (PMC9182110; doi:10.3390/molecules27113591)
Supplement: Supplementary file 1 [file molecules-27-03591-s001.zip]

Archive with 6 entries (6 files):
- note.tex
- S1 table 2MF.pdf
- S2 table 3MF.pdf
- S3 linelist 2MF.pdf
- S4 linelist 3MF.pdf
- supp-mat.rar
