# Supplementary material for: Millimeter-Wave Spectroscopy of Methylfuran Isomers: Local vs. Global Treatments of the Internal Rotation
Source: Molecules. 2022 Jun 2;27(11):3591. doi: 10.3390/molecules27113591 (PMC9182110; doi:10.3390/molecules27113591)
Supplement: Supplementary file 1 [file molecules-27-03591-s001.zip › note.tex]

\documentclass[a4paper,12pt]{article}

\title{Supplementary materials \\
Millimeter-wave spectroscopy of methylfuran isomers: local vs global treatments of the internal rotation}

\author{Jonas Bruckhuisen \and Sathapana Chawananon \and Isabelle Kleiner \and Anthony Roucou \and Guillaume Dhont \and Colwyn Bracquart \and Pierre Asselin \and Arnaud Cuisset}

\date{}

\begin{document}
\maketitle

\begin{table}[h!]
  \begin{center}
      \caption{Supplementary materials: The compressed file supp-mat.rar contains four tables in the .pdf and .tex format. }
      \begin{tabular}{l|c|c}
      \hline \hline
    filename            & prefix in main paper  & content                   \\
    \hline
    S1 table 2MF        & S1                    & full set of RAM parameters of 2-MF \textit{BELGI}-C$_s$ fit   \\
    S2 table 3MF        & S2                    & full set of RAM parameters of 3-MF \textit{BELGI}-C$_s$ fit   \\
    S3 linelist  2MF    & S3                    & all transitions used in the 2-MF \textit{BELGI}-C$_s$ fit     \\
    S4 linelist  3MF    & S3                    & all transitions used in the 3-MF \textit{BELGI}-C$_s$ fit     \\
           \hline \hline
      \end{tabular}
  \end{center}
\end{table}

\bibliographystyle{plain}
\bibliography{./biblio_article.bib}
  
\end{document}
